# Supplementary material for: iSS-PC: Identifying Splicing Sites via Physical-Chemical Properties Using Deep Sparse Auto-Encoder
Source: PubMed Central journal article supplement (PMC5557945; doi:10.1038/s41598-017-08523-8), 2017-08-15
Supplement: 41598_2017_8523_MOESM1_ESM.pdf [file 41598_2017_8523_MOESM1_ESM.pdf]

# **iSS-PC: Identifying Splicing Sites via Physical-Chemical Properties Using Deep Sparse Auto-Encoder**

Zhao-Chun Xu<sup>1\*</sup>, Peng Wang<sup>1</sup>, Wang-Ren Qiu<sup>1,2\*</sup> and Xuan Xiao<sup>1,3\*</sup>

<sup>1</sup>Computer Department, Jing-De-Zhen Ceramic Institute, Jing-De-Zhen 333403 China

<sup>2</sup>Department of Computer Science and Bond Life Science Center, University of Missouri, Columbia, MO, USA

<sup>3</sup>Gordon Life Science Institute, Boston, Massachusetts 02478, United States of America

\*To whom correspondence should be addressed ([jdzxuzhaochun@163.com](mailto:jdzxuzhaochun@163.com), [qiuone@163.com](mailto:qiuone@163.com), or [jdzxiaoxuan@163.com](mailto:jdzxiaoxuan@163.com)).

**Online Supporting Information  $S_1^+$  represents the positive dataset containing 2796 true splice donor site sequences.**

>1

CTCCTCTTTGCCTTACTCCTAGCCATGGAGCTCCCATTGGTGGCAGCCAGTGCCACCAT  
GCGCGCTCAGTGTAAAGTATCATTCCCTCTCACTGTCTCTGGAGAGGACGAGAATTCCAC  
CTGGGGTGCTGGGGGTCCTGGG

>2

AATGACTTCAACTGTCCCAACATTAGAGTATGTCCGTATCATATTAGGCGCTGTATGACA  
ATCTCCATTCGTAAGTACCTCTTGGTCATTTGGACACATTGTAGATTAGTCCCCTACCTG  
GGTAGTTTCTGGGGCCAGGG

>3

TGACCAGGAAGTGGCGGGTGGGCGCCCTGCAGAGGCTGCTGCAGTTTGGGATCGTGG  
TCTATGTGGTAGGGTAAGAGAGAAGAGCTTTTGGCCAGGCTGGAGGGCAAGGGAAG  
AGGTGGGGGGTGGGGCTTGGTCCTGC

>4

TTCCGTCCTCAGATCAAGGAGCTTGGAAACCGGCTGTGGGATGTGGCCGACTTCGTG  
AAGCCACCTCAGGTGGGGGCCCTGATGTTGCTGACGGGGCGCAAGTCCTTTCCCAC  
TGACAGCCTGAACACCCGCCATGC

>5

AGAGAACGTGTTCTTCTTGGTGACCAACTCCTTGTGACGCCAGCCCAAGTTCAGGGC  
AGATGCCAGAGGTGAGTTTACCAGGATCCTCCCAGCGGGTCCCTTGTTCCTCCATCA  
GCCCCAGGTGGCCACCCGTGTTT

>6

TCCGTCCCCTGGCTAACTGCTGGGTGACGAGGACTGCCCCGAAGGGGAGGGAGGC  
ACACACAGCCACGGTAACTGTGGGCTCTGTCTTCCAGTGCCCCCAGCAGGGTGGGGG  
CCGGGCTGGGATCCTGGGTGGCTCCT

>7

TGTTCAATGGGACCCACAGGACCTGTGAGATCTGGAGTTGGTGCCCCGTGGAGAGTG  
GCGTTGTGCCCTCGTAAGTGTCCCCACAATCCCCTACCCCAACTGGCGCAGGGCCCCA  
GGCCTGGCAGAGGCTGTACCTCCC

>8

TGGCCAGGCCAGAACTTCACACTGTTTCATCAAAAACACAGTCACCTTCAGCAAGTT  
CAACTTCTAAGTAAGCAGAGTGGGTCTCATCTGCCCAAGACCCTCCTTGTCCCCTA  
CCTCATCTGACCTTTCCCACTCC

>9

CTGTCCCGTGTTCGCAATTGGGGACCTCGTGGCCAAGGCTGGAGGGACCTTCGAGGAC  
CTGGCGTTGCTGGTGGGTCCCAAGTTGGGGGCAGGGTTCCTAGAGGGCTCTGGGAGA  
GGGTCCCGGGCCACCCACCGGTGG

>10

TGGACACCGGGGACTCTGGGCTGCTGGCCTCACTACTCCTTCCAGCTGCAGGAGAAGA  
GCTACAACCTCAGGTGAGGCCCCACAGCTCCCAGTGCCCAAGATGCTGGGCCCATCGCC  
CTCTCCCTGTGGCGGCCAGGACAGA

>11

ACCGGGTGTGGAGGCCCGCACCCCTGCTCAAGCTCTATGGAATCCGCTTCGACATCCTC  
GTCACCGGGCAGGTAGGCACAGGTAGGGGTGAGGCCGGGGATGGGATGGGGCAGGGCA

GACAGGGCTGGAGGAGGCATGAGGC

>12

TTTCTGTGACCTGCTACTGCTGTATGTGGATAGAGAAGCCCATTCTACTGGAGGACAA  
AGTATGAGGAGGTGAGCTGAGGTGCTCTGCTTGGACCCTGGGTTCTGCCACACTTAG  
GAAGATGTTGGCTGGATCCCTGA

>13

GCCTCCTGTCGGACCCGGTTCGCCGGCGCGCTCGCCCGCCTAGTGCTGCGCCTCAA  
CGCGCCGTTGTGGTGAGGACAGGGCCCGGGAGGCGGGGACCCGAGGGCCCTGGGC  
TCGCGCCGGCGGCCCATGCGCGGTC

>14

AGCAGTTTTCGGGCGGAGACCGTGCCCGGGCTTTTGCCTGGACTTCGCCGCCACC  
GCAAGAAGTCGGGTGAGCGGCAGAGCAGGGCGTATGGGGCGAGCAGTGGTGGCTA  
AGGCCGGGGAGCTCTGCTCAGAGGCTC

>15

AGGGCTGGAGGTCTACACGCAGAGTTTCTCCCGAAACTGCCCTTCCAGATGAGACC  
CACGAGCGCTATGACTGGGGGAGTGGGGTGTGCCTGGGCCAGAAAGCACCTTGA  
GGGAGGGGTCTGGGCTGGGTATCAC

>16

CCCTGTGGCTCTGACTCTACCAACAGCCAGGCTGTGGGGCTGCTGCTGGCACTGGCTG  
CCCACTTCCGGGGTGAGTCTCAGGGCTGCTGGCCGTGGAGGGGTTTGGTCAGTGCCCC  
AGACCCTGCTGATCCTGCTTCTGG

>17

CTGGTAACAGAACATGACCTTCTGGGCACTGAGGCTTGGCTTGAAGCCTACCACGATG  
TCAATGCTACTGGTAGGTTCTTGTCTGCCTGCCCTGGTCCCCCTCTCAGGGTCACT  
GTCCTACCACGTCCTCCATTAG

>18

CCTTGACCTGCTCAATCTCTTCCAGACCTTCTGCCAGAAAGGGGGCCTGTTGTGCACG  
CTTCAGGGCAAGGTGGGGCTGCCTGCCTGCCTGAGGGCTGAAGGGCACAGGGTCTGT  
GGGAGGGGCTGTCTCATCCTGTCTT

>19

TGGAGGCCCTAACCTGCGTGGCATCAATAGCTTCCGCCAGTACAAGTATGACCTGGT  
GGCAGTGGGCAAGTAAGTAGTCTCTGGTCCCCCTTCCATGCCAGGATGGGGTCTA  
GCTGGAGCGGAGTGGGGGATGGCC

>20

TGAGGCTGGAATGGCCTTGAGGAGCCCGGGGTGCCCTGGCCCCAGTGTAACCCTT  
CCCCATCACAGGTGATGGCACCCCTTCTGTTGTTGGAATGGGCTTCTGGGGTCTGAC  
TGGTGTTTAGTGTGCAACTTAG

>21

CTGAGGCTGTGGTGTGACTGCTGGCGATTTATGCAGCTGGCCTGGCCCTGCCCA  
CAATACCCACCGTAAGAGGCTGGGCTGGTTGTTGGGGGCAGGGGTAGAGGTCCCCT  
GGACATGCAGACAGCTTGTGGGTTG

>22

TCTCACTGGGCTTCTGCTGGCCACCACCATGGTGCCCACTGCTGCGCTTGCCAAGCC  
TCATGGGCCCCGGTATGTATGGATCAGCCCCACTTCCCCAATGCCTGTGCCCTCATCA  
CAGACCGCACCTCATTAGTAG

>23

TTCGCTTTGACCCAAAGAACATCAAGGAGAGGTCACCTCTGGCTTTTATTCCCTTCTCA  
GCAGGGCCAGGTAAGGGCGCCTGTGTTTGAGGCGGGGACGGGGAGATAGGTGCAG  
GGGTCTGGGCATGACAGTGGGGAA

>24

GCCGTCATGGCGCCCGAACCCCTCGTCCTGCTACTCTCGGGGGCCCTGGCCCTGACCC  
AGACCTGGGCGGGTGAGTGCGGGGTCGGGAGGGAAACGGCCTCTGTGGGGAGAAGC  
AAGGGGCCCGCCCGCGGGGGCGCAG

>25

AAGGCCCACTCACAGACTGACCGAGCGAACCTGGGGACCCTGCGCGGCTACTACAAC  
CAGAGCGAGGACGGTGAGTGACCCCGCCCGGGGCGCAGGTCACGACCCCTCATCCC  
CCACGGACGGGCCAGGTGCCCCACAG

>26

CTGGAGGGCCGGTGCCTGGAGTGGCTCCGCAGATACCTGGAGAACGGGAAGGAGACG  
CTGCAGCGACGGGTACCAGGGGCCACGGGGCGCCTCCCTGATCGCCTGTAGATCTCC  
CGGGCTGGCCTCCACAAGGAGGGG

>27

GGACAGGAGCAGAGATACACCTGCCATGTGCAGCATGAGGGTCTGCCAAGCCCCTC  
ACCCTGAGATGGGGTAAGGAGGGAGACGGGGGTGCATGTCTTTAGGGAAAGCAGG  
AGCCTCTCTGACCTTTAGCAGGGTCA

>28

CTGGTTCTCTTTGGAGCTGTGATCGCTGGAGCTGTGGTCGCTGCTGTGATGTGGAGGA  
GGAAGAGCTCAGGTGGGAAGGGATGAAGGGTGGGTCTGAGATTTCTGTCTCACTG  
AGGGTTCCAAGACCCAGGTAGAAGT

>29

CAATAAAAGGCGACGGGATGGCTACCTTTTCCAATTGCTGCGGATTGCTGATGCCACT  
TGGACAGAGTGGTGAGGAATTGCCAATGGCAGAGCTGAGTTGGGAGATTACTCACGG  
GGGCAAATGTGACTCTACCCCTA

>30

CTGTTGCTCTATCCAGGAAATACTGGAATGACTGTGAGCCACCTGATTCCAGACGTC  
CATCTGAAATAGTAAGTAAAGAGGGCACCTTCACTCTGCTCTTTTCACTTATTTTCCA  
TCTACTCTGTTCACTCAGCCA

>31

ATAGCTACAAGACATTCCCATGAATCTCAGGACCTCAGAGTGATTGACTTTAACTGCAC  
CACAAGTTCTGGTATGGTAATCTGTTAAATTGCTAATTAATTCTTGATTAATAAAATCA  
ATCATAACAGTGGTATTTGTC

>32

GAAGTACAAAGAGGAGAATGATGACTTTGCCTCTTTCAGAGTGGACCGAATCGAGAG  
AGTTGCAAGAGTGGTGAGTCTCCACTAAGGTTTCGGTTGGAGTCTGAAGGCCAGGCT  
CCAACCTGGCAGCAGGAACTGAATGG

>33

AGGAACTGGTTACTTCGTGGACTTCTCTGTGCGGAACTGCCCCAGACACCATTTCCTCC  
AGACACCCCAATGTGAGTATAAGAAATGTCTGTGATCGTTGACTAGAGTCACAGAGAA  
AAAAGAAAGAGAAGAAGGAGAAGG

>34

TGATGTAGAAGCCTTGGACTTGGAAAGCCCGAAAAACCTTGTCAAACTGTGAAGTC  
TTCGACCCTCAGGTGGGTTGTCTAAGCAGACTTTGTCATGGCAGTGCCAGATTAAGTG

ACATACGTACACAAATAGTGTGT

>35

CCCCTCTACGCCAGCTTTCTGGCCGAACCTTTCTGCAAGGGGGGGCTGTGAGGCTA  
CACGAGCTGCAGGTAGGAAGGGACGCCTTCCCGAGACAGAGTGCTGGGGAACTGG  
TTTTGACAGCGTCAGAAAGGACTGA

>36

AGCGCTGCAGCTTCTCGCCCTGGACGGAGCACCGCCGCTGCCGCCAGCGGGCTTGCG  
GACTGCTCACTGCGTTGAGTCTTCTGCCCCAGAAGCCAGACGCCCTGCACCGGC  
CCTCTCTGCTGCGGGTCCCGAAAC

>37

GGACGTGGCACGGGGCCGCCCGCCCTGGTTCGGGACGTGGCGGGGAATTTACAAG  
TTCGGACTGGAAGGTGAGTCCCAGGACAGAGCTGGGCAGGCGTCGGGGCGCCCTAC  
CAGAGCCTCCCGAACCTGACGGCG

>38

TGGCTGCGCCACCTTGTGCCTGGGCCCTGGGGCCGCTTGCCGAGACTGGGACCAGA  
TGTTTGCATTTGGTAAGGCACAGGTGAGGTGGAATGGGGGAATGTAAAGCTGTCCA  
GGGGTAGCGAGGTATTCACGTGCC

>39

CCGGGAAGAGTTGCCTGCCAGTCCATCCTGGGAAATGTGACAGAGTTGCTATTGGCG  
GGAGTGGACACGGTGAGGTTCTCCCTCCGTGCTGTGAGCCGTTCCAGGGCTTAGCCT  
CCGCAGACTCCGGCTCCATTTTC

>40

GTGCCTACCCCTCAGCCACTGTTCTGTCCCAGCTGCCCTGCTGAAGGCGGTGGTCAA  
GGAAGTGCTAAGGTGAGGGGAAGGAGAGGAGGAACAAGAGGAAATGCCAAGGAA  
GGGCTGGGGAAGCAACTAGTGATGGA

>41

TGTGGTACCTGGAAATTCTCGTGTCCCAGACAAAGACATTCATGTGGGTGACTATATTA  
TCCCCAAAATGTGAGTAAAGCCTATGCACCCTTTCTACTGAGCCATTCCTCACTATCTT  
GGGCCCCAACCTGTTCTCAA

>42

TGGCTTTGGCAAGCGCAGCTGTATGGGGAGACGCCTGGCAGAGCTTGAATTGCAAATG  
GCTTTGGCCAGGTGAGTGCTCTAGATTTTATACCTTCCCAGACTGGAGAGACCCTAA  
CCCTCTAAAGTTGTGAGCTCTTT

>43

GACTTACGGAAAATTGGAAGCTGTGCAGTATAAACTCAAGTTGTTGCTGGAACAAAT  
TACTACATTAAGGTTAGAGTTCAGCACCTACTTTAGCGCCAAAAGATGTATTTCTCATT  
TATGTAAAATATTCCCTGATTT

>44

CCAACAGCTCTGGCACCATCGAGCTCGTGAAGAAGGGCTGCTGGCTAGATGACTTCAA  
CTGCTACGATAGGTACCCAAGACTTGCCCTCCTTCTCTTGGACCCACCTGCGCTTAT  
ACTGCCCACTGGGCCATTTGGG

>45

TTCTGCTGCTGTGAAGGCAACTTCTGCAACGAGCGCTTCACTCATTGCCAGAGGCTG  
GGGGCCCGAAGGTAAGGGGGCAGTGTGGAAGTGGGGCCTTGAGTCAGCCGACCTG  
GGCTTCTTTGGCTTGAGCGCTTGGC

>46

CATCGTCCTGCTGGCCTTTTGGATGTACCGGCATCGCAAGCCCCCTACGGTCATGTGG  
ACATCCATGAGGTGAGACAGTGCTGGCTTGGGGCAGGGCAGGATAGAGGTGGGGAGG  
ACAGGCCAGACCTTTTTAACCTT

>47

GCGCTTTGGCTGTGTCTGGAAGGCCAGCTCATGAATGACTTTGTAGCTGTCAAGATCT  
TCCACTCCAGGTGAGTGTGAGGGGCTCCATCCAGGTCCTCTGCCTCCACTGTAGCT  
TGAAGTGGAGGCTCTCCTGACC

>48

CATTGCTGCCGAGAAGCGAGGCTCCAACCTCGAAGTAGAGCTGTGGCTCATCACGGCC  
TTCCATGACAAGGTGAGCCACCCATCAGAATGGACTCTGAGAGGAGATGGAATGTC  
CCCTGGGTGGCTCTCATAATATG

>49

GCCTCTACACCTGCATGAGGATGTGCCCTGGTGCCGTGGCGAGGGCCACAAGCCGTC  
TATTGCCACAGGTACCTGGGTACGAGGTCCTTCTGCACCTGACCTGGAGCTGT  
GGGAAGGGTTGGTGGGCGAGAGCA

>50

CGTGCTGGCTGACTTTGGCTTGGCTGTTGATTTGAGCCAGGGAAACCTCCAGGGGAC  
ACCCACGGACAGGTAACAGGCCTCACAGGGCAGGAAGAGAGGGACAGACCCAGGGT  
AGATACTTTGCCCTTTTTGTGCTCAG

>51

CTGCGCATTGACATGTATGCCATGGGGTTGGTGCTGTGGGAGCTTGTGTCTCGCTGCAA  
GGCTGCAGACGGTAAGTAGGATGGCAGCCCTGGGCATCTAGATTGAGTGATAGGGAG  
CAGTGGGACCTTAGAGTGATCCT

>52

GGAGCTGCAGGAGGTGGTGGTGACAAGAAGATGAGGCCACCATTAAAGATCACTG  
GTTGAAACACCCGGTAAGGGGCCTGGTTCAGGCAACTTTCAGGGGGGTGGAGAAGG  
GAAAACCCTTCATGTGTAGCAGGTAA

>53

CGCTACCTTGAGATAGAGTTCTGCTTGAACATAGGAGCTGCCCTCCTGGATTTGGAGT  
GGTGCAAGCTGGTACGTGTCAATGTGCAGCAAAATTAATTAGGATCATGCAAAGTCAG  
ATAGTTGTGACAGTTTAGGAGAA

>54

CAGAAAGGAAATGCAACACACGACAACATATGTTCCGGAAACAGTGAATCAACTCAA  
AAATGTGGAATAGGTAATTACATTCCAAAATACGTCTTTGTACGATTTGTAGTATCATC  
TCTCTCTGAGTTGAACACAAG

>55

ACTTTCCAGCTGCTGAAGTTATGGAAACATCAAAACAAAGACCAAGATATAGTCAAGA  
AGATCATCCAAGGTATGATAATCTAAAATAAAAAGATCAATCAGAAATCAAAGACACCT  
ATTTATCATAAACAGGAACAAG

>56

TAGGAATTTCTGATTCATTTAAAGGATTTACAAATTCATCAACCCCTGAAAACATAAAGC  
AAATTGAACAGGTATGATAATAAAATAATTTCAATTTTTTAAGAATGTATTCTACTGT  
TAAAATTATAAAAGTATATT

>57

AAATTGAAGCAAGCATTCTATATTCCAAGAAATTTGGAACACCTATACCTACAAAATAA  
TGAAATAGAAAGTATGTAGACTTTTATTGTGTTTTGAAGAGAGAAAGAATGGAATCCTG

ATCTTTTAAAGAAAAAATATT

>58

ATCATGAAGGGCCTTGCAGCTGCCCTCCTTGCTCTGTCTGCACCATGGCCCTCTGCTC  
CTGTGCACAAGGTGAGTCTGTCCATGTGCTTTGATGGCTCCCTGGGCAGAAGTCA  
GGCGACATCTTCCAAGTGCTGTG

>59

GGCAGATTCCACAAAAGTTCATAGTTGACTATTCTGAAACCAGCCCCAGTGCCCCAA  
GCCAGGTGTCATGTAAGTGCCAGTGCTCCTGCCACCCCTCGGGAGGGAGGATGGGA  
GGTTTGGGGTGAGGTCCCCTCAGAG

>60

TTCAGCGTGAGAAGCAGGCCAGGCCTGGGTCTGGAGCCGTCCTGGCCTTCCAGATG  
ACAAGGACCTCAGGTCAGCTTCAGCGTGAGAAGCAGGCCAGGCCTGGGTCTGGAGCC  
GGGTGATGTGCACATGGGGCTCACTT

>61

ATGGTCCAGCAGAGTCTCAGAGCGGGTCTTTGGAGATGTGTGCCCCCTACTCACTTC  
TCTCTTGGATGGGTGAGTTAAAATATTTTTAAGGCCAGTCATCATAGTTACATTTGAATAT  
AAAGAAGCTTCACTGTGCTGT

>62

GCCCTGTTCTGCCGCTTGACCCACAGAGTGACTTAGGAATTATCCCTAGAGTGGCTGA  
GGAGCTCTCAGGTAAGTCCGATGGTGATGAGTGGGGCAGAGAAATATGGCAGGGAA  
GCCAGGCGGTGAGCACCTTGGTTAT

>63

TGTCGGGGGTCAAGCGTGAGGTGGTGACAGCCAAGGATGGACGGACAGAGTTGCGC  
TGCTGGCCTCTGAGTGAGTACTGCACCTGCCCGTGCTGCTGGCCTCTGAGTGAGAAT  
GGCACCTGCCCTCCACCTGGTCA

>64

GCGGATTCCTCCAGGTCTCACCTGATAATTACGGTGACTCTAACCACAGCCTCCTGCTC  
TGACAGCACTGGTAAGTCAACATTTGTGCTTGGTCAGTGCCAAGTAATAGAAAACCC  
ACTTAAGAAGAAAAAATCAGGC

>65

CCCGCAGGGCATGCGGAGCAGGTGCAGGCTCGACTACAGCTCGTGGACTCGGCCGGC  
AGCGAGTGCCTGGTGAGCAGGGGCAGGCATTTCCCTGGGGGGTGGGTGCTGCAGAA  
GCCTATGATCTGATGGAGCTGGATGT

>66

CCGGACCCCTTTGTGCGGCCGGAGGCGGCGGGGAACGGCCATGGCGCCAACATG  
TACCGGGTGGGAGGTGAGTACCGGGCGCAGGGATACGGGGCCGGGGCGGGAGAGGT  
TGGGGTAGGGACCTGAGGGGCTCGGC

>67

AAGGTTGTCTGTCTTTTCCGGCGCAGGGACATTTCTAGTAGCCTCAACAGCCTGGCTGA  
TAGTAATGCCAGTGAGTATCTTCTCCCTTCTTTTTCTCCTACCCATGATCTGAGGCCT  
GGGCATGTCCCTGCAGGTATT

>68

GCCATCAACTGAAGCACCGGAACTTTTTCTTCTCGGCAATTTGAATCATTACCAGCC  
ACCCACATACGGTACAGGACAAGTGGGGCCAGCATAGCCTGCGTGCACCTACGTAGAA  
GATGGAGAGAAGGAGGTGGTATT

>69

CTCGCTGATCAGGGCGAGATTAGAGTTGGTTGCAAATACCAAGCTGAGATCCCAGATC  
GCCTAGTAGAGGGTAAGCAACAGGACAAGACTGTACGGCTACCAGTTGTCTAATTCC  
AAGGGGCACTTTAACATTATAGTC

>70

AGATGAAGGTCTGGGACCCAGACAACCCTCTCACAGACCGGCAGATCGACCAGTTTC  
TTGTGGTGGCCCGGTGAGGGGTGGGTGGATAGGGAAGATGGGCTGGGGGAGGTGTGG  
ACATTGTTCTGAGTCCCATGTTTCTT

>71

TTGTAGCAGCTCCATTTCGGCAGCCAAGCTTGACATGAGTGCAGCTGCTGCCTCCCGA  
GATATCACTCTGGTGAGCAGAAGTTGGTGGGTAGTTGGGCAGGCTGGGTTTTCTGGGG  
ACTTGCAGAGCCTGGGAACAGAAG

>72

AGAGGCCATGCTATTTGAGGAGGCCCTAGAGAAGTATGGGAAGGACTTCAATGATATT  
CGCCAGGATTTTGTAAAGTGGATGGCACTAGGAGGAGAAGTGGGAGAGATGACAGGTG  
AGGGAACCAGGACCTGGGGCCAGAT

>73

CTGGAAGTCACTTGCCAGCATAGTCCAGTTTTATTACATGTGGAAAACACAGACCGGT  
ATATTCAGCAGGTATTATCTGGGCTGGGGAGGGTGGACCATAGGCTACCTGCTGACCTC  
TGCCTTTGAAGTTGATGACATT

>74

TCTGTGGGTTCAAACCTGGCATGAATGGGGCTGGATTCAGAAGGGCCTGACTTGTG  
AGAGTTGCCACAGTGAGTTACGGGGGCACTGGGATGGTGGGGATGGGTGGAAGGCCT  
GCTGTGGCTCAAGAATCTGAGGGGC

>75

GATCTACTGGAAGAAGTATGGGGGACTGAAGACCCCAACTCAGCTTGAGGGGGCCAC  
TCGGGGCACACGGTAAGGATCAGTGGGAAGAAAAGCAGGGGAGAGCAGTAAGCATA  
TTGATGGTGAGCTTAGGTGAAGGCCA

>76

CTATTACAGCCAAGGAGGGCCGCCGACGGCCTTATGCTCCTATCAATGCCAATGCCAT  
CAAAGCAGAGTGTAAGGGCAGGGAGTGGTGGGACTGGTGGTGGGTTTCGGATTGCTC  
TGCCAGAGACCGTTGTTTCTCTG

>77

GCCGCCAAGACTCCATTGAAGATTCACCCTCTGGTGC GGCTGCCCTGGCAACTATCG  
TCAAAGATCTGGGTATGGGATGGGGACCAGTGAGGTTGGCATCAGGCTCCAGTCCTT  
TCCCTGTCTGACATCTCTCCCTT

>78

GATCAACAGAAACCAGCTGTCCAGAACCAGGGGACTGGGGGGCATTATGGTGAAACG  
GGCCTATGAGACTGTGAGTTGACAGAAAGGGGTGGGCCAGATTGAGTTGGGTGGGCT  
TTTGTCTCTCATAGGAGTCTGAGAGG

>79

CCAAGCGTCAGAACTAAACCCAGCTGATGCCCAATCCTGTGGTGTGGTGGCCAC  
AAAGGATACCAGGTAAGGCGTCTACCATGGGAGGGGCTGAGAGGGACAGTCCAGGCT  
GGTGAGTGTGGGGAGTAGGAGTATC

>80

GATTGAAAATGATCAGTCGATCAGCCGAAATCATGCTGTGTTAACTGCTAACTTTTCTG  
TAACCAACCTGGTATGTTACTAATTTTATTTCACTAGTTTCCAGTAAGGGGGTTGAAATC



ACAAAATATTCTCTTGGTTTG

>81

AGAATGGCTTTTCCCGAACTTTGAAGTCGGGGGATGGTATTACTTTTGGAGTGTGGGA  
AGTAAATTCAGGTAAGACATTTTAAAATTGATTTTAAAATGGACAGCTTTGTTTCAGCC  
AAATCCTAAAGGAAAATGATAT

>82

ATTTACTGTAAACAATTGGACAGAAGAATGCACTCACCTTGTCATGGTATCAGTGAAAG  
TTACCATTAAAGTAGGTTGAATGTCTTGTCTTATGTTAAAAATAAGTTATTTGAATTTAA  
GCTTACCCACTATACACAGA

>83

TAAAGCCAGAATATTTTACTGAATTCCTGAAAGCAGTTGAGTCCAAGAAGCAGCCTCC  
ACAAATTGAAAAGGTATATTATGTATTTAAATATAACAAGATGCACTTATATGATAGCAT  
TGATTTTTATTTAAGTTAATT

>84

TCTGTCAGGACGGCAGGAAAGAAAACAAATCTTCAAAGGGAAAACATTTATATTTTTG  
AATGCCAAACAGGTAATTATGTTATAAGCTAAATTTTCTAAAGAATACATTACAAACTA  
GGATACATTATTAACCTTATC

>85

CAAACCTACAGACCTTAATTCCTGACTGTCAGAAGAAATGGATTCAGTCAATAATGGAT  
ATGCTCCAAAGGTATAGAATTATTCTTTATTAGTAAAAAACTGCAAGTAGGAGATTTTAT  
GTTAACCTTTTTTGTGCTT

>86

GAAATTGGATTGGCGGTGATTTTCATGACTACAAAGAATTACTGTGATCCTCAGGGCCA  
TCCAGTACAGGTAATTGAAGCATTATTTTATTGATTCGTTAGCACTTTATTATGTAAAT  
CGATAAGCTAAATATACGTT

>87

TAATGCCAAGCGCCCCAGTGAACACTACAACATACGTAGCTGACACAGAATCAGAGCA  
AGCAGATACATGGTAAAGCTTCTTCACTACCGTACTATTGTTATTATTCTATCAATAAATT  
AATAGTATATTCAGGAAGTAA

>88

AAGATAGGGCTTCTCAGCAGCAGCAGACCAACTCCATCAGAACTACTTTCAGCCGTC  
TACCAAAAAAGGTCTGTTTTTGATAACTTCTCTCATGTCTCTGAAAAAAAATGAAA  
GTTTTTTTACTGTTGTAGAATGG

>89

GCCAAGGATGGATATAGAAACAAATGACACTTTCAGTGATGAAGCAGTACCAGAAAGT  
AGCAAAATATCTGTAAGTAACATTTTAAATGAGAGGTATAGTACATAGAAGCTTAGAAT  
GCTAACAGGTACTTTCGATTTTG

>90

TACTTCCAGAAATCCATCTGGCATAAATGATGATTATGGTCAACTAAAAAATTTCAAGA  
AATTCAAAAAGGTAGGTATTTCAACTGTATCACAAGAGGTCAGTGTGAAATGTTTTT  
AGAGATACCAGTGATGCTAAAC

>91

ATCAGATCTAATAGCTCATCATGCTCGAAAGAATACAGAACTAGAAGAGTGGCTAAGG  
CAGGAAATGGAGGTTAGTAGGAAGTGAGGCCAGAACTTGCTTAAATTGCACTTTGG  
TCCATTATGGTGGCCTTCAAGCAA

>92

CCGGAGGACGAGTCGACCCCGGAAAAGAGGACTGAGAAAATCTCCGCCAAATGGAC  
ACAAACAACGACGGTGAGGGGCGGGGCGGGACGGGGTGACGGGGCGGGCGCCTT  
TCCCTCCCTCCCTCCCTGCCTCCCTT

>93

GGCGCTGGCTCCCGGAATATGGAGCCCTGGGCGCGGGGGCGGCGTGTGAGGTGGTTG  
CGGAGCTGGTAAGGTGAGGGGAAGGCAAGGTGAGGGGTACGGCATTCCGCTCGCTG  
GCAGGGAGGGGCGCGGGGCGGCTCGA

>94

TCATATTCTAAGAACTCAGCCACTCAGGTATCCACCATGGTGTGGGTCCTGAACAGAA  
GATGTCAGATGGTAATTTACCACTTTGTGTTATTGTCTAATTTTATTTGTAATTAGGTTTAT  
GTTGGTAACAGAAATTTAT

>95

GTCCCCTGGGGACTCAGAGGAGTACTTCGCCACTTACTTTAATGAGAAGATCTCCATTC  
CTGAGGAGGAGGTTAGTATCAGGTCCTTGAGGAGAACACTATTGTCTGGGGAAAACC  
TGTGAGTGAAAGATCTGCTGGAT

>96

GAGCATTGCCTACCTGGATCCAGGAAATATTGAATCCGATTGTCAGTCTGGAGCAGTGG  
CTGGATTTAAGGTGAACATCTAGTCTACCCCTGTCTTTTAAGCACATAATACCCTCTC  
ACATCCTTTTCTCCACCCTGC

>97

GCTTGCAGCTAGACTGGGAGTGGTTACTGGGCTGCATCTTGCTGAAGTATGTCACCGTC  
AGTATCCAAGGTGAGCAATGTATTGCTGTTTGTCTCTCACCCATGCCATAGGAATCT  
GTGTGCTGGCGGTATGTGCT

>98

CTATCATCGGCTCAGACATGCAAGAAGTCATTGGCTCAGCCATTGCTATCAATCTTCTGT  
CTGTAGGAAGGTGAGGGGTTTTCTCTAGAAAGTCATCAGTGTGTTTGTGATTTCCAA  
GCAGAGATAAAAACAAAACC

>99

ATTCCTCTGTGGGGTGGCGTTCTCATCACCATTGCAGATACTTTTGTATTTCTTCTTG  
GACAAATATGGTAAGGAGAGCAGGAATGGGAGGGTCAAAGGAGCTGCTCTCTGTCAT  
GTGGCAGATGGGGAAGTCTACCT

>100

ACAGGCTGTGGGCATCGTGGGAGCTGTCATCATGCCACACAACATGTACCTGCATTCTG  
CCTTAGTCAAGGTGAGCAAGGCCCTTATCTCCTTCACCTCTAGACAGTTCATGGGATC  
TTTTCTTCAATTGCAAGGGAC

>101

CTTCATCATCAATGTCTTTGTTGTCTCAGTCTTTGCTGAAGCATTTTTTGGGAAAACCA  
ACGAGCAGGTGGTGAGTAAGCCAGGGTTATGGGTGGTAGTGAATGTGAGGGTAAAGT  
GAAGACTGCAATGGGATGGGGAAG

>102

TACCAGCAGTCCTCATGCTGGCCTCTTCTCTAAAGATAACTCGACACTGGCTGTGGACA  
TCTACAAAGGGTAAGCATGTTTGGATTTGTGATCTTTGTTCTGAATCAGTATTTTTAG  
CATAGTATGTGGTCTTTTTTG

>103

AGTGGGGATCCTGGCTGCAGGACAGAGCTCCACCATGACAGGAACCTATTCTGGCCAG  
TTTGTGATGGAGGTACGTGCTGGTATAGGATAGAGGGAGATAACACAACCCTTTTGCTA

CTTCTTCTTCTTCTTCTTCTT

>104

TGCTGTCTTCCAAGATGTAGAGCATCTAACAGGGATGAATGACTTTCTGAATGTTCTAC  
AGAGCTTACAGGTGAGGAGGAAGCTGAGGAAACACATCCTAGTTATTCAGGTAGCATT  
ATGTACTIONCCTTGGGTACCAAG

>105

CCTTTGCTCTCATACCCATCCTCACATTTACGAGCTTGCGGCCAGTAATGAGTGACTTTG  
CCAATGGACTGTGAGTGACTCCTCTTCGTTCCCAAAGGGGATGCTGATATGGGGAAA  
GGGTATCTTCATGCAGTAGGCC

>106

AGGGCATGTGGCATTATATGTGGTGGCTGCTGTGGTCAGCGTGGCTTATCTGGGCTTTG  
TGTTTACTTGGTAAGTCTAGCCTGGAAGAGCAGGGGCATAGGTATCAGGGATGGTTG  
AGGTGGGGTTCACTGACATTCAG

>107

GGGCCGCGTATGGAGCCCCGCCCCCGGAGCTGCCAACATTGCCAACGCCACCGCCA  
CGCTACACACAGGTGAGCTCTGGGCCTGGAGGGTGGAGGGCCAGTCCGTGACCCCA  
CGTATCCTTCCCGCCCCCGCGCAGA

>108

ATTCCACCCTTCTGTACATCGTAGCGAATCAATCCGTGGCGCCGCACTCCTCCGCATC  
CCTCTTTAACAGTGAGTCTACCTGAGTTTGTATTCTGCCTCCTCCAGTCCCCAATGCA  
TCAGTCCATGGCTTTTTTCAA

>109

ACTACGCAAGAACAAGACCAACATGAATTACGACAAGCTCAGCCGGGCCTTGCGGTA  
CTACTATGACAAGGTACAGTCTCTCAGACCAGGGCTGGAACCCCCCTGACATTTATA  
TCAGAGATTTTATTTTGTTTAAT

>110

GGGAAGTGCTCCGGCCTCCAGGCTCCGGGGCCGGCGCTGACCCATCCCTGCTTCTCT  
ACGCATACATTGGTGAGTGCTGCGGAGGGGTGGGGTGTGTGGGCGCCAGCACCAATG  
GGATTGGCATGTGGCGGGTACTGA

>111

CGCGCTGCGCGCTGGGGACCGCCTGGTTCGAGGTCAACGGCGTCAACGTGGAGGGCGA  
GACGCACCACCAGGTGGGGGCCAGCGCTCGCCCCGGCCCGCCGCCCTCCCGAG  
CGCGTCCCCTGGGGCGAGCAGGGGT

>112

CCACGACCCCTGGGAGCCGAAGCCAGACTGGGCACACACCGGCAGCCACAGTCCGA  
AGCTGGCAAGAAGGTATGGCGGGCTTGGCCACAGGGACCACCCTAGCCTCTCCAG  
AGGCTCTCTCAGCTTTTGACGACGAT

>113

CATCCGCTCTGTGGACCCGGGCTCACCTGCCGCCGCTCTGGCCTCCGCGCCAGGAC  
CGGCTCATTGAGGTACCGGCCACCAGGGCTGCGGGGTGCCGAGTCCCCGCACCTGT  
CCCACTGGGGCCCTGGGTCTTG

>114

GTCGTGGACCCCGAGACAGATGAACACTTCAAGCGGCTTCGGGTACACCCACCGAG  
GAGCACGTGGAAGGTGGGCCACGGCCAGGGCACAGGGTGGGTGCGGTGTGGTGGC  
TGAGCAGCCACTGACACGCTGTCCCA

>115

CCGGGAGGCCTGGCCTCCCCAGGGCCGCCACCTCTGCTGGTTGCTCTGTGCTTTCAC  
CTTAAAGCTCTGGTAAGGAGAGTAAGGGGAGGGAAAAGAGTCACTGGAGGACAGATT  
CGTCCCCGGCCTCCGGGCTGGGGA

>116

TTTGCCATGCTGGCTGGTGGGAAGAGTTTGTGGTAGCAGAAGAGTGCTCTCCATGCTCT  
AATTTCCGGGCTGTGAGTATCTATTTCTCTACCCTTTTTTTTTTAAACATCTAAGCAAA  
CACTTAAGCAACATCTTAACAT

>117

CTGAGTGTGGTCCCACAGGATATGTAGAGAAAATCACATGCAGCTCATCTAAGAGAAA  
TGAGTTCAAAAGGTGAGTGCTGTTTCTTCTCTGAGATCACCTCCTTTGCTCCTATGA  
CTTTAGATGGATGGTCCCACCTT

>118

GGAGCAGGAGAGCTGTCTGGATGGCTGGGAGTTCAGTCAGGACGTCTACCTGTCCAC  
CATTGTGACCGAGGTGGGTGCCGGCCCTGCTGGGGCTGAGACCAGGGCTCGGAGGA  
CCTGTCGCGGTCTTGAACCCGAGCT

>119

CACTACAATCTCCTTGTCTTTCGTGGGTGTGCTGTTGGGCTCCTTCATTCAGGGCAG  
CTGTGACAGAGTAAGGTGTCTGTCTTCTGGAGCACAGGGGACCTCAGCACTGAGG  
AAGAAGCGTGTGCCTGGCCCTTGA

>120

ATGTTTGTGCTGCTGTTTGTCTTGTAGGCATGGGCCAGATCTCCAATATGTGGCAGC  
ATTTGTCCTGGGTATGGCCATCAGGTTGGAGTTGAGTACTTGATCCTGTATTTACCATC  
ATCCCATCACCTACCTTTCTG

>121

TCATCCGAGACTGGCGGATGCTGCTGGTGGCGCTGACGATGCCGGGGGTGCTGTGCGT  
GGCACTCTGGTGGTGAGTGTGACCCTGTGCCCATGTGCCACTGGCAGGATGATTTT  
TGTCTGGCCTTCACTAGAGGGCAG

>122

GGTGATCATCCGAAGGCTGCCAAAGCCAATGGGATTGTTGTGCCTTCCACTATCTTTG  
ACCCGAGTGAGGTAAGCACCATGTGGGTGTGGGTGAGAGGGACAGACTGACCGTGAT  
TTGAGAGCAGCAGCACCCAGCCCT

>123

CCCACAACATTCTGGATCTGCTTCGAACCTGGAATATCCGGATGGTCACCATCATGTCC  
ATAATGCTGTGGTATGTAAAAGAGACCTGCCTGAGGCTTCCAGACAAAGCTTCTTGAA  
GTGGCCATTGGGCCTCTTGTTA

>124

CGCTATTCCATGGCCACTGCCCTCTTCTGGGTGGCAGTGTCTTCTCTTCATGCAGCT  
GGTACCCCCAGGTAGGGACCATGTGCATCTATGTTTGGGGTCTTCACTGAGTCTCTTA  
CTGTCTACCAGGCTGTCTCAAT

>125

ATGGGTGTGGGAGTCAGCTCCACAGCATCCCGCCTGGGCAGCATCCTGTCTCCCTACTT  
CGTTTACCTTGGAAGTCCCATGAGCCAAGGGCACACTAGAGCAACGGGATGGAAGTA  
CTAACTGGCTTGAATGTGAGCTG

>126

CCTGTTTCTCCCAGAGAGCTTCGGTACCCCACTCCCAGACACCATTGACCAGATGCTA  
AGAGTCAAAGGGTAAGAAGACCTCCTCTGTCAGTGTTGATGCACTGGGTCTGGGTCTG

GCCAGGTCTCAGGAGCCCCTCAC

>127

CTCGGGGTCGTATGACGCACTTTTCCAGCTCGAGCCCTCACGAGGCCGTGGGTACGAC  
CGGAAGCCGCAGGTGGGTGAAGCGGAAACGTTTCAAACCGGGATGTTGCGGGCCGTA  
GCGCGTGGGCGGCCGTGGGGTCTTG

>128

GGGTTCAAGCGATTCTCCTGCCTCAGCCTCCCGAGTAGCTGAGATTACAGGCGCCCGC  
CACCACGCCAGGTAATTTTTGTATTTTTGGTAGAGACGGGGTTTACCATGTTGGCCA  
GGCTGGTCTCAAACCTCTGACCT

>129

ATTCTGGAACCCTAACAAGATCACATTTTTGACCAAAGTCAATATCTTGGACTATAGTTA  
ATTTATCAAGGTAAATGCCACTTTGATGTGTCTTGGTTAGGAATCTTTGTTCACTTGAGG  
GAATACATGGTATATGATAG

>130

GAGTGCTTTAGGAGGCCAAGGCAGGAGGACTGCTTGAGCCCAGGAGTTTGAGACCAG  
CCTGGACAACAAAGTGAGATTCATCTCTACAAAAAAAAAAAAAAAAAAAAAAAAAATAGC  
CAGGCGTGGTGGCACATGCTGGCTAA

>131

CCCGGGCTCCAGAGGGAAGTGCCTTCGGCAGAGTTGAATGAATGAAGAGAGACGC  
GGAGAACTCCTAAGTGAGTAGATGCAGCCATGCAGTTCGCCTTCTTTTATGCTTTTTC  
CTTCTTTTGCACGTCTCTTTTC

>132

GATGGGATCCGGCTCCTCCAGCTACCGGCCAAGGCCATCTACCTGGACATCGATGGA  
CGCATTGAGAAGGTAGCCCCTCCCCACCCAGACCCCCCTCCTCCCCCGGGTGACA  
GCGCCGGGGCCGGGCGCGCGGGG

>133

TAATCTTCAGCAAGTACTGCAACTCCAGCGACATCATGGACCTGTTCTGCATCGCCACC  
GGCCTGCCTCGGTGAGTGCAGCTGCGGGCTCTGCCCGGTGACGCCACGCGCCTCCT  
CGCCTTTTCGGGATGGCTGGGAG

>134

CCATCTCCCTGCTGACCACCGACGACGCCATGGTCTCCATCGACCCACCATGCCCGC  
GAATTCAGAACGGTAAGAGGCTCCGGCCGCGCTCTCGGGGTGTGCTGGCACTTCTC  
TCCATGACATGGGAGGCTTTCTGT

>135

AGTGGACAGGTAGAGCCCAGGCCAGAGAGCCCCAGGGCTGCTACCAGGAAGGCCA  
GCGCATCCCTCCAGGTAACGGGAGCTCCTCGGCCACAGCCTCCACCCCCAACACGT  
GGGATTCGGGCTGCAATGGCCTACAC

>136

GCATTCAAATCAATGAACTGAAAGCTGAAGTTGCAAATCACTTGGCTGTCCTAGAGA  
AACGCGTGGAATGTGAGTGACGTTTCTGTTTCTTTTGTCTCTGTCCTTAACTCT  
ATTCAAATTAACCACTTGAAC

>137

TGGTGGAGATTGAGAAATGCAAGAGTGACATTAAGAAGATGAGGGAGGAGCTGGCGG  
CCAGAAGCAGCAGGTAGGGTCTGCGCTGGGGCCACGGGCGGCCGGGCTGGGGAGG  
GCTCCCCGTACCAGTTGGGCTGGGGCT

>138

CTGTAAGTACAGTTTTTTGGATAACCACAAGAAGTTGACTCCTCGACGCGATGTTCCCA  
CTTACCCCAAGGTAAGATGAGATTCCGGCCCCAGAAGAAGCTGCAGCTGTGTCCCCAGC  
CCCACGCCAGCCCTGTGGCCCT

>139

GCTCTCTCCAGAGACCATCGAGGCCCTGCGGAAGCCGACCTTTGACGTCTGGCTTTGG  
GAGCCCAATGAGGTAAGTGCGGGGCTTGACAGGCACCACGTCCCAGGGGGAGGCAGCT  
CAGGATCTTGACGCCAGTGGGACC

>140

GCACATGTACCACGACCTCGGGCTGGTCAGGGACTTCAGCATCAACCCTGTCACCCTC  
AGGAGGTGGCTGGTGAGTGCCAAACCCGCTTCGGTTCTTCTGGGCACGTGGTTTCA  
TCCAGTTCCACAGGAATGGAGGGA

>141

CCACAATTCCGGCACTGCTTCTGCGTGGCCCAGATGATGTACAGCATGGTCTGGCTCT  
GCAGTCTCCAGGTGGGTCTGCCCGCTGCACACCCAGACCTTACTCTCGGGGGTACG  
ACGGAGGCCCTTCCAGGGAGC

>142

AAACGGATATCCTGATCCTAATGACAGCGGCCATCTGCCACGATCTGGACCATCCCGGC  
TACAACAACACGTATGTACAGGATTTTCTTTTTTCTTTTAAAAGGCACCCTGGCTA  
CTGGAGGGAACCTGTCAGCCC

>143

GATCCTCGCCGAGCCTGAGTGCAACATCTTCTCCAACATCCCACCTGATGGGTTCAAG  
CAGATCCGACAGGTGTGTGGGGTGAGGGCCCTCCACCGGAGTGGGGGCACATTACG  
GGACAGAGCAGCCCCACTCTCCAT

>144

AGAAATTATGGATTCTTTCAAAGAGAAAATGGAGAATTTTACTACAGCAACGAGGAG  
CACATGACCCTGGTGAGTGGCTTATTCTGCCTGGGTGGCAGCCAGGCGGTGGGCTGG  
CGAAGCAGGTCATCCATCCAGCTC

>145

TAACGAGGTCCGTCCAATGGAAGTCGCAGAGCCTTGGGTGGACTGTTTATTAGAGGAA  
TATTTTATGCAGGTAAGAGTCTTGACAGCAATCAAGCCTCCAGCCACTTATTAGCC  
CCACTTAGTAAGGGTTTGCCTTA

>146

GACCAAGGCCACAGCCCAGATTGGGTTTCATCAAGTTTGCCTGATCCCAATGTTTGAA  
ACAGTGACCAAGGTGAGTAACTGTACCCACATGTCACACTTGCTTACTCAGATACA  
TGCATGCACACACAGGCACACACA

>147

GCTGCAGCCACTTTGGGAATCCCGAGATCGCTACGAGGAGCTGAAGCGGATAGATGAC  
GCCATGAAAGAGGTAACACACTGAGAAGAGCCTGCCTTCTTGCGGCAAGCAGGC  
ACGCTGCCCTCCGCACTCCCGACTC

>148

ACTGACAGCTTGACGTCTGGGGCCACCGAGAAGTCCAGAGAGAGAAGCAGAGATGTG  
AAAAACAGTGAAGGTAATGCTTGCTGCTGAAGTGGCATCTCAGCGCATAAATGAT  
TCTGACAAAAGACAGAAGGAAAGAG

>149

ACTGGGCACCCAGTCCAGGAAAACCAACCCAAAAGGAAGCCAAGTATTAAGAAATCA  
CAAGGCAGGAAGGGTAAGACAGCATTGCGAGCATATTTATTTTCAGAAATGCATTTTCT

CCTCCCAGCCTCTTAAGGATAGGG

>150

CCCGGGCTCCCAGAGGGAAGTGCACCTTCGGCAGAGTTGAATGAATGAAGAGAGACGC  
GGAGAAGTCTAAGTGAGTAGATGCAGCCATGCAGTTCGGCCCTCTTTTATGCTTTT  
TCCTTCTTTTGCACGTCTCTTCTT

>151

TTTGTCTTCATTGAATTACGACACTGTCCACCTTTAATTCCTCGAAAACGCCTGTAAC  
TCGGCTGAAGGTTAGTGCAACTTCATTTCTTTCTTTACTCTCCAGAGCTCCCCAAACA  
TCAAGAAACAGGACAAGGCAA

>152

GTGTGGGGACAACGCGGCCTGCCAACACTACGGCGTGCGCACCTGTGAGGGCTGCAA  
AGGCTTCTTTAAGGTGAGCAATGGCGGGAGCGGAGTAGGCAGGTAGGGAGCCCCTAG  
TGCCCGGGACCTCGGAGTGTGCCCTC

>153

AAGCGTCGCCGAATCGCTGTCAGTACTGCCGATTCAGAAGTGCTGGCTGTTGGGA  
TGGTCAAAGAAGGTAGGCTGAGGGGAGCTGCCGACCCTCCAGTTTGCCTTTAGGA  
AACCACTGCTCATACTCCAGCATCA

>154

TCTGATCAGTGCCCTCGTCAGGGCCATGTCGACTCCAACCCGGCTATGACCAGCCTG  
GACTATTCCAGGGTAAGAAGCTGGCGGGGGGATATCATGTGGACAAACCGACAGATG  
GGCAGGACCCCTCCCCACATCCGT

>155

CCAAAGCCGACCAAGACCTGCTTTTTGAATCAGCTTTCTTAGAACTGTTTGCCTTCGA  
TTAGCATACAGGTAATAAGGGAGGGAGGAGACAATCCAGGGAGGCTGTGAGAGAAAT  
CAAGAAAGGAAAAGAAAGGGAGGA

>156

TCCAATTGCAGAATATGAACATCGACATTTCTGCCTTCTCCTGCATTGCTGCCCTGGCT  
ATGGTCACAGGTCAGTACTGCAGGCGCAGGGCGCTTCCCCTCCAGAACTGCCTAGCAG  
GATTTGCTCAGTTCCTTCCCTTG

>157

CAGACCGCGGACGTCTGTAATCTCAGAGGCTTGTGGCTGAGGGTGCCTGCGCAGCTG  
CGACGGCTGCTGGTGAGCGCCCCGACCAGACCGAGGGACAGGGCGAAGGGGGACT  
GGAGGAGGGAACCCCTTTAGGGAC

>158

AAAATTTGACCAAAATTTGGATACAAAGTGGTACCAGTGAAGGCAACACACAGAAG  
ATTATATGGCGCGTTGGTAACATCTGAAACTGTCCAGAGGGACTCTGGAGAGAATGG  
TCCTCGCTGTTGGGAGTTGATAGCC

>159

CACAATGGGGAATACAGCCAAGGGAACATGGCTTACAATGGCCATGAATGCTTTTG  
GTGACATGGTGAGTGTGGCAAGGATTGCTGAACTCTGTGCTGCTTCTCAGTTCTTCAC  
CAAAATAGTCTTGCTTTTAACATT

>160

GATCTTCCAAATCTGTGGATTGGAGAAAGAAAGGCTACGTGACGCCAGTGAAGAATC  
AGGTGAGACAGCGTCAGATTCAGACCCTGTCTCCACAGGAAAGCCAAGAAGGAATTG  
GTGTCATTGCTGTGGTAGATGGTGG

>161

TAGGGCCTTCCAGTATGTCAAGGAGAACGGAGGCCTGGACTCTGAGGAATCCTATCCA  
TATGTAGCAGTGGTAAATGGAGCTCCTTATCTTGTTCATTCGTGCTCTGCTTTTGGAAAGT  
GGAACACTTTCAGAGATAACAG

>162

GTCGCAACTGTGGGGCCCATCTCCGTTGCTATGGATGCAGGCCATTTCGTCCTTCCAGTT  
CTACAAATCAGGTAAGTGTCAATTTATTATAGAAATTTAGGCAGAATTGGGAAGCATCA  
CTGTGATTGATTCTTGGATATG

>163

TTCTGGTGGTTGGCTACGGCTTTGAAGGAGCAAATTCGAATAACAGCAAGTATTGGCT  
CGTCAAAAACAGGTATAAACTCAAATTTGAAAAGGGAATTTTGTTCCAAATCAGTA  
TTTGGATAACAAGTTCACAAAAGCT

>164

GGGGGAAAGATGGTGGGGACCAAGGCCTGGGTGTTCTCCTTCTGGTCTGGAAGTC  
ACATCTGTGTTGGGTATAGGCTAAGTATCTGCTGGCTCCCAAATCTTCCACTTGCCACA  
GTGAGGTTGTGTCTGGTCTGGGAC

>165

TCAGTAAGAAGAGTCCAGCCTGGGAAGAAGAACCCAGCATCTTTGCCAAGCCTGCC  
GACACCCTGGAGAGTGAGTTGTGGCTGAAGCAGGGAGGGGCTGGAGGGGCAGCCTTT  
AACGAGCTCCGAAGTGGATCTCTGA

>166

TGCCTCAACAGGGAGCAGCGGCCTGGCCAGAAGTCTAATTACACCGTACGCTTCC  
TCTGCCACCAGGTAAGCCAGAACGCCCCACCCACCCGCTACTTCCACTGGCCT  
CTACTCAGGGAGAGGGAGAACCTG

>167

GCAGAGATGGTGTGCTGTGCAGTGAGGCCAGCGAAGAGGGTCAGCACTGCATGGGC  
CAGGACTGTACAGGTACCACCCTCCCTCCTGGCACTGGGCAGGGTGTGGTGGGTGAG  
GCTGAAGAATGAGGAGGGGAGTTAGAG

>168

CCCATTGTACTIONACAATGCCAAGACTAGCCTGAAGGCAGCCACCATCAAGGCAGAGT  
TTGTGAGGGCAGGTAACATAAATCTTTGGGATAGGGCTGGTGAGAAGGTCCAGATTTTT  
AAATAAAGGATTATAGTGCTAA

>169

GGAGAGCTGGGCAGAGCGTGTCTGTGCTGTAAGGCCACAGGGAAGCCCAGGCCAG  
ACAAGTATTTTTGGTGCATTTCTGCTAGCTACCCTGCCAATTCTCCTCTGGAACC  
AGAGCTTCTTGCATTGGGTCTGGA

>170

GAGTACTTTTGCAAGGCCAGAGTGATGCTGGGGCTGTGAAGTCCAAGGTTGCCAGC  
TGATTGTACAGGTAAGCCTGTCTGGGTCCCTGGGGCCCTGGGTCTGCAACAGGGTT  
GGCTGAGCACCCAGGTGGGCATAA

>171

CCGCTCCTCCTGGAGAGGGGATCTCTGCTGCTCCGACAGTTGAGCCCAGTTCCGGGGA  
GGCTGAAGGCGGGTAAGAGGTCTGCGCCCGAGGAAGACGCGGGAGGGAGGCCCG  
CCCCTCGCGAATCCCGCGGCTCCTGG

>172

GTGAGGTAGAGCTGCAATGTGGGATTTGTACAAAATGGTTCACGGCTGACACATTTGG  
CATAGATACCTCGTGAGTACTTTTCATAGTTTTTGTGAGAATTGCTCGGTAAAATAAATC



TGAACATGCTCAACAGTTACTT

>173

ACCAACTACAGTTTTTCATTGCAACGTCTGCCATCACAGTGGGAATACCTATTTCTCCG  
GAAGCAAGCAAGTAAGAACAACTCTGGAGTATTTGAAGATGATTATCCACTGGAAAA  
GAAAAGGGATCTGGGCGTAGCAG

>174

TTTGGCCAACCTGACATGGCAGTCCCGAACACAGGATGAACATCCGAAGACAATGTTC  
TCCAAAGATAAGGTACAGGTGGAACATAATGTGATTGCAGTTATATTGAAGAGTTAGGTG  
GAACTTCTAAATATACTCCCTAA

>175

CTGGGAGTGCATGACAACCAGACAGAGACCTGGGAAAATGACTTGGCCAAATAACAT  
TGTTAAAACAATGGTAAGTAGATTAATAATTGATTAGACTTGACATTTAAAAAACATTG  
TTTTTTGTAAGAATTCAATAATAT

>176

AAAGGAACACCCAGATCCAGGCAGTAAAGATCCAGAAGAAGATTACCCCAAATTTGG  
ACTTTTGGATCAGGTACATTAATATGTTTTACATTTCTTTTTGATTTTAAGCCACTCGGG  
GATAGGTAATCAGGTTCTGTTT

>177

AGTAACATTGGTCCTGCTTATGACAACCAAAAAACAGAGCAGTGCTGTGTCTACTAGTG  
GGAATTTAAATGGTAAGTGTTTACATATCTCATTGCTGAAATATTTGGAAGCTATTGAAT  
CCAGTTGTGCCTAGAACTGGCC

>178

GAAAAGGACGAGGAGCCAAGCGCAAACAGCAGGATGGAGGGACCACAGGGACCACC  
AAGAAGGCCCGGAGGTGGGGAGAGTGCCACCCCTGCCCCCTCACTATTTAAGTATTA  
TTTGGTGCTGGGAAAGTCCAGCAGAG

>179

AAACCTATTCTGGAGACCTCTACAGAGCCTGCTTGATGAACGGGTTTTGTTAGCCCT  
ACATGATCGAGGTATGTAAAGTATTGGAGATCATATGGATGCAGGGTTACTTTGAACTG  
CCATCATTAGCCTTGTCAGTCT

>180

TATTTTCAAATCACTGTGGATGAGATGCCACCAGATACCGCTGCCAGACTGGGTTGGTC  
CCAGCCCCTAGGTAAGCTGGGGCCTTAATATGGACATCACAGCAGATAGAGAGGATAG  
ACCATCTGGCCAAGGGCTAAGGC

>181

GGGATTTTATATTAATCTTCCTGAAGACACAGAGACAGCCAAGTCATTGCCAGACACAT  
ACAAAGATAAGGTGAGTTTGTCTCTCCCGGCAGATTCCTGGCTTTGAAGGCCTGTGG  
CAGCCAGTGCTTATCACTGGCTT

>182

TTTGTATTTGAGGAAAAAGACTTTGTGGATAAAGCAGAGAAGAGCCTGAAGCAGACT  
CCCCATAGTGAGGTGAGTCATGGCCATAAGAACATTAGAATCATAAGGCCTTGAGCGTT  
AGGACCCATTCTTCATTATAAA

>183

AGGTGTGGCTTACAAAGATATTTTGGAGGGGTTTACTTCCCAGCCATCTCACTGTACA  
AGAGCTGCACGGTACGTACATGTTTCCATCCCATGAGCAAACTTGAGGGAAGCAGAT  
GAATGGGTTGTGATGACAAAGTT

>184

GCTGGAAGCCAAGCGGCTGCAGTGCCCTTTGAGCAGGAGCTGCTGAGACGGCAGCA  
GAGGCTGAACCAGGTGGGTGATGGGCACCCAGCAGGGACCACGCATCCTCCAGGGCT  
GTCCTCCAGGGAGGAGCTCTGCTGTG

>185

GGCTAAGGTCCTCTGTTGCTTTTTGGTTCCACCTTAGAAGAGGCTCCGCTTACTAAGA  
GTAGCTTGAAGGTAAGCCAGTGGGGAGGAGGGCTCCAGGGCCAGCGGCGGGAGCGG  
GAGGCCTGTTGGACATAGGGGCTGG

>186

ATGTTGACAACATTGCCGCCGATACTGCTGCTGTCTGGCTGGGCCTTTTGTAGCCAAGA  
CGCCTCAGATGGTGAGTCGGGGGCACATCTCCTGCCTCAGGATGGTTCTGGAGAATCT  
CAGTCTATCTGGGCACATGGCAA

>187

GGCCTGCAGTCCTACCTGCTCCAGTTCACGGCCTCGTGCGCCTGGTGCACCAGGAGC  
GGACCTTGGCCTGTGAGTAGGCGCGCAGCGGGGGCGGGTCTGGGCGGGGCTAGTGG  
GGGCGGGGCTGGCGGGTGGGGGCG

>188

CTGCGGGAATTCCTGGAGGACACCTGTGTGCAGTATGTGCAGAAACATATTTCCGCGG  
AAAACACGAAAGGTATGATGGGACGGGGCCAGGCCTGCAAGCTGGGGAGAGGGCG  
GGTCCAGACAAATGGATGGACCTGA

>189

CAGGCTCAAGCAATCCTCCCGCTCAGCCTTCCAAGTAACTAGGACTACAGGCATGTG  
CCACCACGCCTGGTGAATTTTTTAAATTTTGTGTTGTAGAGATAGGTTCTCACCATATG  
CCCAGGCTGGTCTTGAACCTCT

>190

TCTTACTAGTTTCTGCTGCTGGTGTACTCCTATGCCGTGCCCCGCTGCATGCCGGC  
CTGGCCTCCACGTGAGTGGCCAGCTGGGCAGATGATGGGTGTAGGTGGGGGAGGGA  
TGGCACCCACCCATGGGGCCCTG

>191

TCAGTGCCAGCAGCTTTCACAGAAGCTCTGCACACTGGCCTGGAGTGCACATCCACTA  
GTGGGACACATGGTGAGTGGCAGCCCCTGGAGCCTAACAGGAGTCCAGGCTCTCAA  
GGCTGTGGCAGAAGACCGTGACCTT

>192

TACAAATGATGTTCCCATATCCAGTGTGGAGATGGCTGTGACCCCCAAGGACTCAGG  
GACAACAGTCAGGTACCACTGGGATGTGGCTGGGCAATGAAGGAGAGGGGACTGAGA  
ACATGGCTGGGTACCATGGTAAACC

>193

TTCTCTGCTCCCTGATAGCCCTGTGGGCCAGCTTCATGCCTCCCTACTGGGCCTCAGCC  
AACTCCTGCAGGTATGAAGTAGGGGCGTGGAGGATGGGGGCTTGCAGGTGTCAGAGA  
CAGAGGGTTGGGGGTTAAGGGTTT

>194

GATGTGGGAGTCTTCTATGGTTCCACTGCTCCATCTCGCCTGCCACCTGGGGCACAGG  
GGCCTCAGCAGGTGAGGTGCCAACCGCTGTGGGGAGGCATGAGCAGTCCCAGGAAA  
TTCCTGCTGTGAGGGGCCGGGGAA

>195

GTCTCAGATGGGGCCCTGCACAGCCGTGCTGCCTGCTGATTGCAGAGCGCATCCATT  
CGGGTTACGAAGGTGGGCATGTCAGGGCCCTGGCCTGGTGGGGGCTGGGAGGAAGGA

CATCTCCTCATGGCCAGACATGAAT

>196

CTGGGGGCCCCAGTGCTCCTGTTCTGCATCCTGAGGACCGACCCCTCATGCTGGCTAT  
CCACAAGAAGAGTTCCTCTCGCCCTGCTCGCCCTTCCCACTGTCCTGGGCTTTTGAGT  
GGCTGCCCTTGTGGTTGTGTCTC

>197

CAGCCCAGCTCCCTCCCTGGACTGATATCCAGGAGCTGTCAGAGCAGATCCACCGG  
CTGCTGCTGCAGGTGAGAGTAGCGGACAGGGAGCCTGGGAGGTGAGAAAAGGTGTG  
GGAAGCCGGGTCAAGCCATCTAACCT

>198

TCTCCACAGCCCTGGGTCTCCAGTGATAGCAACGGGGGTGATGCAGAGGGGCCTGG  
GCCTCCTGCGCCAGTGAGTGACCTGCTCCTACCTCACCTCTAATCGCCCTTCCCTC  
TCCTTCTTGAACCAGCACTGCCA

>199

TATACCACCTCCTCAGCCTCTGACGACGACAGGCAGAGGACAGGTCCAGTCTCTGTGG  
GGACCAAGAAAGGTAAAGATCCAATGCACCCTGCTCCCACTGCCCGTCTGGCCTGG  
TGGCCCTGTGTCTTTCCCTTCTG

>200

AGGATCCCATTGGCTGCTCATGGCCAATGCTGACCAGCGGTCATGATGACCTACCAG  
GTGCCCTCCAGGTGAGGCATTTAGAGGCCTTCTTGGCCTTCCTTCAGAGGTAGTAGT  
GGGGGCAGTTTTCTTTCTGGG

>201

GCGGCGGGAAGTGGGTGCTGTGCACTCCTGGGTCCGGAAGGGCCAAGTGCCTCGGGC  
TCTTGATGTGATGGTGAGAGAAGCCTGGGACGGGGAGAAAAAGAATTGAGCTCAAT  
TCAAGGGGGAGAAAAAGAATTGAGC

>202

CCTCCTCCCCGCGCTGGTGCTGCTGGCCCGGCTGGGGGCCCGGCGGTGCCGGCCTGG  
AGCGCAGCGCAGGTGAGCGGCGGGGGGAGGCCAGGTGCCGGGTTGGGGGGTCTCT  
CACGTCTGTGGGTCTGGTCTATCGGG

>203

CACGGCGGCATCCACTTCGACGACAGCGAGTACTGGGTCTGGGCCCCACGCGCTACA  
GCTGGAAGAAAGGTGACCGTCCAGGCTCCTCCTGGAGGCCTCCTCTGCAGCACAG  
TGGGCTGCCGCGTTCGGGCTTTGGG

>204

CTGAACGCCACGCTGCGCGGCTGGAAGGCGTTGTCCAGGACGAGCTGTGGGGGCTG  
CACCGGCTCTACGGTGAGTCCCTTTGTGCGGGCGGGAGGGCGGGGACCGGGCGGTCT  
GAGCCAGGCGTGCTCCCCACGCTCCC

>205

AGGGGCTTCTGCGACGCTCGCCGGCGGCTCATGAAGAGGCTCTGCCCCAGCAGCTGC  
GACTTCTGCTACGGTGATGCCACGGGCGGGACAGGGCTGCGTGGGAGCTGGGCCT  
TGGCCATGGCGCAGCTGAGGGGGCAC

>206

TGGTGCCCGAGGGCAGGAACGTGACCTCCGCTGCGGCCAGAAGATCCTCCACAAGA  
AAGGGAAAGTGTAGTGAGTGAGCGCCCGGGCGGTCTCGGGGTGGGCAGCCCGCGG  
GCGGCCTTGGGGCAGGGGTGCGGGGC

>207

CGTCTTTCAACTGGCAAGAGTCATTTTGACCAGCAGATTAATCAACTGTAAGACGGATC  
CTCACACAAAGGTCGGTACTTGGAATATAAACTGAATATTTTACTTTGAATATTGAAA  
TTTTTCTCAAAGATAACATTT

>208

GAATGTAAGGGGAAGCGAGGTGTGAAGTATATTTATATACATATATACACACATATAGTC  
AATGCCAAAAGTTTATCTTCTGTTCCCTCGGCGCCAACCTATTTCAACAACGCGAGCTT  
TGCTTAGAAAATCAATTCCAC

>209

TGGAACAGCCAGGTGTACTGCACCAAGGACCAGCCACAGGGGTCCCACTTTTGGAAA  
TCTTCCTTTCCAGGTAGGGGCGATGGAGAAAAGGGACCGACACGAGGGAGGGGGAGA  
GAGAAGGAGAAAAGAAAGGACTAAGA

>210

GAGTGGCGACCGCGGCTGGAGTGTGGGCCACCTCAAGGCCACCTGAGCCGCGTCTA  
CCCCGAGCGTCCGGTGAGAGCGGCCCGACTTCCCGCCCCTAGGCTGTGGCCCCCGC  
CCTCTGCTGGGGATGCCACGTCCGG

>211

GGACCAGAGGTTAATTTATTCTGGGAAGCTGTTGTTGGATCACCAATGTCTCAGGGACT  
TGCTTCAAAGGTACATCACTTACACATTAACCTCTGAATGTTTTTAAGCACTCACCAG  
GTTAGGTTCAAGTCCTTAAGTA

>212

AAAACGGCATGTTTTGCATCTGGTGTGCAATGTGAAGAGTCCTTCAAAAATGCCAGAA  
ATCAACGCCAAGGTGTGTCTGCCTCTTCATGATGGTAACAATTTGTATCATTACAGCTTT  
CAGGGGAGTAATAAAAAGAAGTT

>213

CAAGTGATGGTTTAAGGCAAAGGGAAGTTCTTCGGAACCTTTCTTCCCCTGGATGGGA  
AAACATCTCAAGGTGAGTGTATAATAAAGATCTTGGCTTATGCAACATGAATGTTCTCT  
CGTTTGCATCAATTTAAGAATAA

>214

ACACACCCTATGGGTGGCTTCCAGCTTCCCTGGTTCCAGCAGATATATGCACGACAGTAC  
TACATGCAATAGTGAGTCCTTCCCGCCATGCTGGGTGTGGCCAGGGCTCCCGGAATT  
GAAGGGAATTTTATCCATGTTAC

>215

GTATCCTCTACTTCTACTCCTCCCTGAGCAGATTCTCATGGTCATGGGGGCCACCGTTG  
TTATGTACCTGTAAGCAGATGGTTTCTCTAATATAAATTACACTACACTGTGTTACACT  
AAGCAGATTTTGCTTTTTT

>216

GGTTCAGAACTTCCCAAATGATGGTCCTCCTCCTGACGTTGTAAATCAGGACCCCAAC  
AATAACTTACAGGTATGGAGCCTCCACGAAGCCAGCGAGCTTGACGTGATATGCC  
AGGCTCTCCAATCCTCAACCTTTA

>217

CAGCATCACATCAGCATTAGGGATGGTCTCTTAGGAGCCAAAGACAACACTGCACAA  
CAAATTAGCAAGGTAGCTATCAGCATCATTACGTTGTCTGTTGCAGTTTTTCTCTGGTT  
CCGTCGGCTAGCACGCAGATGG

>218

ATCCACTGATGCATATGAGCTGAAGATCGCCAACAAGCTCTTCGGAGAAAAGACGTAT  
CAATTTTTACAGGTAATTTACCTGGCCTACCCACATTTCAATTTGCATCCTGATGTCTGT

GTCTCTGAGTGGCCAAATGGAA

>219

ACTGATTTTGCAAATGCTCCAGAAGAAAGTCGAAAGAAGATTAACCTCTGGGTGGAAA  
GTCAAACGAATGGTAGGAGAGCCACCCATTATAGAAACACCTTTGAGAAACCTATGCC  
AGTGAGCCTTGCTTGACACTGC

>220

TTTCAAAGGGCAGTGGGAGAATAAATTTAAAAAAGAAAACTAAAGAGGAAAAATT  
TTGGCCAAACAAGGTATTGTCTATATTTTATTTATATAGTGAATATGTTAATACATGGAAT  
GTTAAACATTTCTGATGGAAT

>221

AATACCATACAAAGGCAAAGATCTAAGCATGATTGTGCTGCTGCCAAATGAAATCGATG  
GTCTGCAGAAGGTAAGAACTTGCATCTACAACCTTCTCTTCTACTGCCGGACATTTTTC  
CAAAGATACCAAGTTTAAACAA

>222

TTTAACGCTGACAAGTTCTGCATTTCTGCTGTTTCAGTTGTACTACTACAAGCACTATTT  
ATCAACAAAGGTAATTTTATTCCTTCTTCTTATCATTCTCCTTTCTTATCATTGTATATT  
TTCTGATCACACTTCTCT

>223

ATGCAAGTTTTCTGTGTTCCAAGAGACTTTACTGCATTTGCACTGCAGTATCACCTATG  
GAAGAATGAGGTAAGTGACTTGCTTTCAGATAATGGAATGTGTCTCTTTTACAAAATA  
GTATAGGTTTAGGCTAGTTTA

>224

AACACATTGACAGGAAATTTGTTCCCTCCGAAAGTTACAGTTTGGTCGTTATCCAGGA  
GCTTTTGACAGGTAAGTTCAGAGTCAAAACGTGAAATGTGAAATGAGTGTGTTTCAGT  
CATAATTCTGCAGTGTTTTTAC

>225

CTTTGTAGAAGAAGTACCACACTCTAGGTTTATTGAGTGTAGGTATAAAGAAGCTCGAG  
CATTCTTTCAGGTTAGAGACAACCAAATGTGTACTTTTAAATTAAGAAAATGTTGGGA  
TTATTTTAAATTTGAGGGTG

>226

CTGCAACTAGCAGCGAAAACATTAACAAATTGGGAGTACCATTCTGGCTGAGCAGTG  
GAACTGTCTAGGTAAAATTCTTACGACTTTCATTTGTCTTCTGTCAATTTGCTCTCT  
GGCTTTAGGGATTACTGCTTGA

>227

AGATTACAAATCTGATATTATTTTAGCATTTTCAGGATGCAGGACTCCGCTCAAACACA  
AATTTGGGAAGGTCAGTAACAAAAGTCGGCTTCATTTTATAAGTAACATATCTCACTTG  
TAAAGTTTACATTAAGCAACTC

>228

TTTTCTTCTATGAAGAAACTGATCACATGTGGAATGGAGGCACTCAGGCCAAAACAGG  
AAAAAATTCAAGTATGAATCAAATAAGTACTTATTTATAAAGGTACTIONACAGAAATAATT  
TCAGGAGGTAGAAATAAAGAAG

>229

ACCGAAACCCTGCAGAGGGAACCTGGTACATCCAGTCACTTTGCCAGAGCCTGAGAG  
AGCGATGTCCTCGGTAAGTTTTGCCTACTCAGCCCTCCTCACTGTTACTACTACCTTCCC  
CCCCTACTCCATCACACTACTATC

>230

GTGGTGGCCGTCGCTGCCAGGCACAAGTGTCGCCGCCGATCTCCTTCAGCGCGAGCCA  
CCGATTGTACAGGTAGGGTGTGCACACAGGTACAGCGGCGGGCGGTGGGCGCCGGGC  
CCCGAACGTCACCGGGGCGGGGCC

>231

AGTGATGAAGAAACTTGAACTGTTTGGGAAATGCAACAATCCAAATGGCCATGGGC  
ACAATTATAAAGGTGAGAGAAAACTGATGACATTTACGCCCTTCAATAAGGATGAAA  
GAGTATTCAGCAAATGTAGACATA

>232

GTATTCCCGATCTGCCATGTATTCCAGAAAGGCCATGTACAAGAGGAAGTACTCAGCCG  
CTAAATCCAAGGTAAGGGAAGAGGACCACGGACCATTATGTCTTAACCTTAATTGGCAT  
TCTCTTACTGTTGATGCATTTG

>233

CGCAACTGTTACAAAACCAAGTTGGTGGTGACAAGAACGGCGGTACCCGGGTGGTTAA  
ACTTCGCAAAATGGTAAGATGTGGGGACTGTAAATTGGATTTTCTGTTTATGCTTGAAT  
ACTGTGAAGATGTTTTGAATACT

>234

GAGAAAAGTGCAGCCAGCATTACCCCGGGACCATTCTGATCATCCTCACTGGACGC  
CACAGGGGCAAGGTGAGAGTACCTGTGCTTGGGGCGCTTCACTGCAGCTGCCTGGGG  
TGCCTGGTGGCAATGCGTTTGACG

>235

TTACTTCAAGAAGAAGAAGCTGCGGAAGCCCAGACACCAGGAAGGTGAGATCTTCGA  
CACAGAAAAAGAGGTAAGTTTCTACTTGTCTCCTGTGTTAGCACTGGCCCTTCTAC  
CTGGGAGTAAAAAGAAACAGTTG

>236

TCCCAGCGCGCAACCACCCCGCCTGCCTGCCAAAGCACCGGACTGGAGCACG  
GAGACCTACCAGGGTAAGTTGGCACTCCTTGGCCCTCAAGCCTCAACTGCAGCCCCA  
TGTTATGCGCCACTCTCAACTTGA

>237

GATGTACCCTGCCACATGTACCAAGTGACAAGTCAAGACGGGGAATAAAGCGGAGC  
GAGGACAGCAAGGTAAGCAAGTGCACCCCTAGGGACCCTGCGCTCAGCCCCTCGCGC  
GCGCTGAGTTTCAAGAAAAGTTTT

>238

GAGACGTGACCGGATTAACGAGTGCATCGCCAGCTGAAGGATCTCCTACCCGAACAT  
CTCAAATTACAGTAAGTGAAGCTGGCCCTTCCAACCCAGTCCTTGCCAGAG  
GGCGGGCGGGTCACTCGCCGCTG

>239

AAAGCACTAACAAACCTAATTGATCAGCAGCAGCAGAAAATCATTGCCCTGCAGAGTG  
GTTTACAAGCTGGTGAGTGCTGATTCTGGCTATGCTCTTTAAGAGTTTGAGTGAAA  
TAGAGAGCCCGTGGGCTCAACAT

>240

GGCCGGGCTGCAGGAGCTGCGATTCCCTGAGGAGAAGCCGCTGCTCCGGGGCCAGGA  
CGCCACCGAGCTGGTGAGTTGGAGTCGCGCCTTTGAGGTCTTAGGGCCGAGCGCGCC  
ACCTCGTGCCAAGAGGGAGACCGCG

>241

GGCCTTTGTTTGCCTTCTGGTAGAGGCGGGTCCCTCCCTCGGCAAGATGCCGGAG  
TGCTGGGATGGGGTGAGTGAGGGCGCTGCGGGCATCAAGGTGGGCCGGGAGGATGGT

GCATCCTTATGACCCACCGCAGGGA

>242

GTAGTGATCCGGGGCTCCCCAAGGGGAACCGCCCAGCCATCCTCACCTACCATGATG  
TGGGCCTCAACCGTAAGTGACGCCAGCCTCAGTCAGCCCTCCTCTGCCTCCCATCAG  
CCAGAGCGGTGAGGCCCCACCC

>243

CCAAGCACTTTGTGGTGTGTACGTGGATGCCCTGGACAACAGGTGGGGGCGTCGC  
AGTTTCTCAGGGGTAGGTACCCTGAGCCCCCTGTGCTGTCTCCAGCTCTGCACCTG  
AGGCCACACCTGGGCCCTGACCTCC

>244

GGTGGAGGGGCTGGTGCTGGTGAACATCGACCCCAATGGCAAAGGCTGGATAGACTG  
GGCTGCCACCAAGGTGTGTGTGGTGACCGGGGGTGGGGTGGGTATACCTAGGGTGGG  
GTGAGGGGCGGCACTCACGCTGGCGC

>245

GCTACCGGCAGCAGATTGGGAACGTGGTGAACCAGGCCAACCTGCAGCTTTCTGGA  
ACATGTACAACAGGTGCGGGTGGGATCAGCAGCCCTGGGACCCAGCACACCCCAGTG  
GGGGCCCTTGCACTGCCCCCTGAG

>246

GCTGGGACTTGAACCAGCAGTAAGATTTTCACGACACAGTGCTGTCTGCTTCTCCGTA  
AGAAGTTAGAAGGTAAGAAAGCCAGAAATCCCGTGGAGAGGCAAATGTAAGGGATGT  
GGCAACGACCACTCTATTCTACAG

>247

ACCTGACGACTTTGATTCTGAAGACAAAGAGATATTAAGCTGGGATATTAATGATGTGA  
AACTGCCACAGGTATGACTTGCTATAAAAATCTGCCCTCAACATTGGGCTGTGAAGTC  
TTGACTATTAACATGCGGAGAC

>248

CTCGCAGAGGAGGGGCGCAAGATCTACCTGAGACCTGCCATCTGTGACAAGGCCCGG  
CAGAAGCAGCAGCGTGAGTAGAGCTTCGTGGCACCAGCAAAAAGCTGACATCCCTC  
AGATGCCCTGCCAGATGGGTCACTG

>249

TTGCCGAGGTCATGGGGGCTTCCCGGTCACCAACTTCTGGAGGCACGACGGACGCTTT  
ATATTTTCCAGGTTGGATTTTGTAGTTAGTTACGTGAGAGTTTCATTACTGAGGAGTTT  
CACCAGAGGCTAGAAATGCACC

>250

AGCCATGAAGAAAGTGAACACAGCACCTTCTCCGTCTCATTGAGCCTGAAGGGGAG  
CACAGAGACCAGGGTAATCCTTCATTATGTATGTTCAATACATGCAGTAGCTTGCCACG  
CCTGTGCTGGGGGCGGTAGATTTT

>251

CTAGAGCGGTCCTTGGGGAGACGCGGGTCCCAGTCCTGCGGCTCCTACTGGGGAGTG  
CGCTGGTCGGAAGGTGAGTGATCCCCTGTCGGGGACCGGGGACTTGGGAAGGACAG  
TTCCCGGACTGGACGGCCAGAACGCT

>252

GACTACGCAGGAAAGCCCCAGCCACCCATCAAATCAGAGAGAAGGAATCCACCTTCTT  
ACGCTATGGCAGGTAATGATCACTATTGTGGAGTAAGACTTTTTTTTTTTTGGAGATGGG  
ATTTTGTGATTGCCAGGCT

>253

TGCACCGTCACAGTGTCTGATTTGTATGCCATGAACTTTGAGCCGAGGGCCACAGACA  
AAGATATCACTGGTGAGTCATGGGATAAATGCTCTATTTATAAAAACTATCTTTATGTTTT  
TTACTTTAAAAAATGTTGACT

>254

AAGGTCTCTGGCTAGCGACATCACTGATGAGCAGAAAAAGGTTCCGGGAGGCTGACCT  
AGTGATATTTCAAGTTTGTCTCTAATTAATATATTGAATCAGATTCATCTTATGTACA  
AACTCTTTCTGAATATTGAGT

>255

GATGGATAGGGTGCTGTGCCAGGGCTTTGCCTTTGACATCCCAGGATTCTACGATTCCG  
GTTTGCTCCAGGTATGTGCTCTTGATAAGGATCACTATGGATAGTTGGAGGGAGGGGA  
CAGAGGATGCGTCTTCTATCAA

>256

AGGCACGGCCGAGATGTACACGAAGACAGGAGTCAATGGAGATTCTCGATACTTCCTG  
TGGCCACTCCAGGTAGACCAGCTGCGAGTGGCTCCCTTGCTTGTGGCACACGCACAC  
ACAGACACACACATGCACACATGC

>257

TCAGAATGACCCTTGGGCCCCACTGTGGATTTCACTGACTTCATCAACAATGAGACC  
ATTGCTGGAAAGGTCAGCTGGCCGGGTAGAGGTACAGGATGAGCCTTGCTTTCTCT  
TGGGAGGGTCCCTGAAAACCACCT

>258

GGCAGTGTGACCAAGAACCATGCCTGGTGGATCCAGACATGATCAAAGCCATCAACCA  
GGGCAACTATGGGTGAGAGGCCCTAGAGGCACCCTCAGTGGGCACACATGCATACTCA  
TGCATGTATACACGCATGCTGTGC

>259

TGAGGGCATTGCTACCGCCTGGGCACCATCCGCCATCTTCTCGGTCATGAACATGC  
ATGAAATTTATGTAAGTCCATCCTTCCCCACAATGCTGCCATCTCCCCATGGCTCAGAAC  
CTCAGGGATGCTGGCCCTGTG

>260

TGGCCCAACCTGATTCATGAGCCTTTGACCAAGGCAACTGTGCAGGCTCCTGGGCCT  
TCTCCACAGCAGGTAAGCCAAGGGCAAGGGCTGGCGCCTGGGAGAGGAGGGCCAAG  
TCCTGAGCCTCCCACAGCCCCTTA

>261

ACACCCACCAGCAGCAGGGCTGCCGCGGTGGGCGTCTCGATGGTGCCTGGTGGTTCT  
GCGTCGCCGAGGGTATGACGCAACAGGGGATGTGGGCAGAGAAGAGGGCAAGGAGC  
TCCGTGGGCATGGCCTGGGCCATGAT

>262

CTGCCCCAACAGCTATGTTAATAACAATGACATCTACCAGGTCACCTGTCTACCGCC  
TCGGTCCAACGTAAGTCAGCACTTGGGTGAGGGCGCCGAGGCAGGAGGGTTGTGAA  
AGCCTGGAGTCTCACCCCTGACGT

>263

ACACGCCAGTGAGCCTTGGGAGGCCAGAGAGATACCGCCGGCATGGGACCCACTCAG  
TCAAGATCACAGGGTGAGGGGCGTGTGGGCAGAGGGGTTGGGACAGCAGGGTTTG  
TGCTAGGGGCTCTGGAGCCTGCCTTG

>264

GGTGCTGGTGTACGGCGGCAGGGGCGCTCTGGGTTCTCGATGCGTGCAGGCTTTTCGG  
GCTCGCAACTGGGTAATGCTGCGGGCTGGGGCTGCTGGGTCTCCGCGGGGTGGCCG



GGGGCTTTCGTGTGGAACCCGGCGG

>265

GGAGAATGAAGAGGCCAGCGCTAGCATCATTGTTAAAATGACAGACTCGTTCCTGAG  
CAGGCTGACCAGGTAGTTTCAAAAAGGCCCCCAAACATTGTGAGGGGAACCTGGGG  
AGAGGTGACCACTGGCTGTATGTTT

>266

GGTGAAGAGAAGGTGGATGCAATTCTTTGCGTTGCTGGAGGATGGGCCGGGGGCAAT  
GCCAAATCCAAGTGTGAGTCCCTTTCCTGAGTCACTCATTGTTCTGCTCTGCTCTTTTC  
CAGCTGACAAGGATTGGGTTTGC

>267

ACCAAGCATCTCAAGGAAGGAGGCCTCCTAACCTTGGCTGGCGCAAAGGCTGCCCTG  
GATGGGACTCCTGGTAAGCCTTTATTTCCCTATCTGTGGAGTGGGGTTGCTTACCTTGCT  
TGCTGGGGCTGCTGGGCACTTTC

>268

AGCTCTGCCAGAGCCTGGCTGGGAAGAACAGCGGCATGCCGCCGGGGCAGCCGCCA  
TCGCTGTGCTCCCGTAAGTGTGCTTGGGGTCCCTGGCTGCTGCCACCTCTGCCCACTG  
CTGCAGGTGACCGTTTGTCTGACT

>269

CCCCGATGAACAGGAAATCAATGCCTGAGGCTGACTTCAGCTCCTGGACACCCTTAGA  
ATTCTAGTTGAGTGAGTATTACAGACATGTCCATGACTGAGCAGCTTCCAGCCCCTAT  
TCTCTGCCTGCTGTGGTCCAGAG

>270

CGCGCTGTTTACATCTTTGCCAAGAAGAACGACATTCCCTTCGAGCTGCGCATCGTGGA  
TCTGATTAAGGTAGGTCCAGCCTCGGGTTTGGGGAACCGAAAAGTCAGGAAGGGGA  
CAGGTAGGCATACATAGCTTAGGG

>271

CCTTTGCCAGGTGAACCCCTCAAGAAGGTGCCAGCCTTGAAGGACGGGGACTTCA  
CCTTGACGGAGAGGTAAGTGGGACCCTAGGACTGCTGCCAGGCCTGCTGGAACCATCC  
TGTTCTAACCTCTATTTATAGAC

>272

TGTGGATGAGTACCTGGCATGGCAGCACACGACTCTGCGGAGAAGCTGCCTCCGGGCC  
TTGTGGCATAAGGTGAGGCTGGGAATGTGGGGGGCGGCAGCGAGAGCATTCCCCAAA  
GGTGTTTCAGGCACCAGTCTCTTCTT

>273

GAACAAGGCCTTCTTACTGGTCCTCACATCTCCTTAGCTGACCTCGTAGCCATCACGG  
AGCTGATGCATGTGAGTGTGTTGGGAGGTGAACCCACTAGGCAGGGGGCCTGGCT  
AGTTGCTGAAGTCTGCTTATGCT

>274

TTATATCCTCTGGGCTGGGTTTCTGAAGTACCACACATAGAGGAGAGAGAAAATG  
GCTGAGTTAAAGGTAAGAAACCATCTGACAAGTTTGCTATGGCTTCTTACGCCAAAATT  
TATGGAAGTTTCTGAGAACTTCA

>275

CATTTCTGGATTTGGGAATGAGTGTCTTTCAGAGGATCCTCGCTGCCAGGTTCCCTGC  
CAGAAGGACAGGTATGAGCAAATAAAGTGCTTAGAAGAGCTCTGATTCCTATTTCTG  
GATGACTAGCTTTCAGGCCAAAG

>276

CCTACAATCTCTATGCTGAGCAGCTCTCAGGATCGGCTTTCACCTTGCCACGGAGCACC  
AATAAGAGAAGGTACAAGGATTAGATGAATTCTGACCTGCAGACTGTGGGTACTATGA  
CAGGGACTTTGTGCTGCCTCCTT

>277

GCCCTTTGAATCCATTGACGAAGGCCATGTCACACTCACAACCTGGGATGAAGTTGATCCT  
GATCCTAACAGGTAACCTGGTCCTGTGAATTGAAGCTTATCATATACCCAAAGCCTTG  
ACTAGAAATACCTAAATAGAATA

>278

CTGGAGACATAAAGTCTAACAATGGGCTTGCTATCCACATTTTCTCTGCAATACCTCCA  
TGGAGAACAGGTAAGTGGCTCAGTTTTAGGGAAGGACATGCCATCTTCTAAGGGATT  
TTGGCCAGAAGTCAAACCTCCAG

>279

AGGGAACCTTCTCATTTACACCGAGTTTGGCAAGATGCTTGTACAGCCCAATGAGATCT  
GCGTCATTACAGTTGGTGATGTGTCCCTTCTCTCCCTGCTTCTACTAATTTGGGAGC  
AGTCAGATGTTTCAGCTGCTG

>280

GAGGAGACCAGGGGCTACATCTTGGAGGTCTATGGTGTCCACTTTGAGTTACCTGACC  
TTGGACCAATTGGTAAATCTTCATTACAAGCCTCTAAGCCTCGCTTGAGATGTAGGACT  
CAGATAATTGCATGAAAGTTAAA

>281

GGATCGCCAAGTACCAGGTGGTTACACGGTCATTAATAAATACCAGGGCAAGCTGTTTG  
CTGCCAAACAGGTAAAGTAAAAGGGTTGGCAGGCAAGGGAGGAAATGAAGAGTGATT  
GAGCACTTACTGATTGCCAAGGCG

>282

GAATTATACACCCTACAAGTACAACCTGAAGAATTTTCATGGTTATCAACTCAGTGGCCT  
TTGACCATGCAGTAAGTCTGAACCCTGTAGGGGCCTTGGGATGAGGCAACGCTTGGGT  
GGGAGGGGTCCACAGTAGACCCC

>283

GCTGATTTTGTATCTTCCCACCTCGATGGGGGGTTGCTGATAAGACCTTCAGGCCTCC  
TTATTACCATAGTAAGTCTCTCTTTTACCAAGCCACATTTGCAAGCCAAAGAGACAACA  
AAGCAGTGAGCGCTACACATTG

>284

TGATGCTGACTGCTTTGAGAAGGCCAGCAAGGTCAAGCTGGCACCTGAGAGGATTGC  
CGATGGCACCATGGTAAGTATGTTAACTGCCACATCCAGCGGCCTCTGAACTCCCCAC  
CCTTACTGAGAAGGGTTGCCGTTT

>285

TCAGGACACAACCTGTGGGACGTGCCGTCTGGCTGGAGAGGAGCTGCCTGTGACCAG  
AGGGTTCTCATAGGTAAGTGGAGATATGAATGAGTTCATAAGTCCCTGCATGAGACTCAA  
GGCTCTTAATAAAATCTTAAATCA

>286

CTCTCATGAGGGACCAGCTTTTCTCACATGGCACAGGTACCACCTCCTGCGTCTGGAG  
AAAGACATGCAGGTATGTAAGAAGCATTTCAGTTTGAGACTCTTTACAGACAAGATG  
CCTTGTTTGTAAGTGATTTTAATT

>287

GTCTTTTCTCAATGGCGAGTGGTCTGTGACTCCTTGGGAAGATTATGATACCCTGGGAAC  
ACTTTGTAACAGTAAGTTCCAAATGATAGCTTGGAGTCAGAATTTCTTTTTAGATAAAG

AGATTAAATATGTTGCCTGAAA

>288

CCTATTTTTGTCCTCCTGCACACCTTCACAGATGCAGTCTTTGATGAATGGCTGAGGAG  
ATACAATGCTGGTAAGACATTTTCATATGCTTTTTGCATGCTCAGCTGGGCGGATTGTTT  
AGATGGCATAGTTATCAGTTC

>289

GTCACCAACACAGAAATGTTTGTACTGCTCCAGACAACCTGGGATACTTATGAAAT  
TCAATGGCCAAGTGAGTGTGAAAGTGATTTTTACTGTGATAATTTCCAAAAGCAAAT  
GTGTTATCTTTCAAGTAGAGTA

>290

CTTTCCAGCTCCAATCTTTGATGATCAGTGTAACACTACACGATACTTTTCTTTGTCCT  
GGTTTTCCCTGTTAGGAGAGAAAGCATTGCATTAATCTTTTTCTGCTTCTGGAGATTG  
TTTTAGTTAAAGAAATCATA

>291

ATGCTCAGCTTTGTGGATACGCGGACTTTGTTGCTGCTGCAGTAACCTTATGCCTAGC  
AACATGCCAATGTAAGTGCCTTCAGCTTGTGGGGGAGACTGGGTAGAGAGGTTAGA  
TGGGAGGGCACCCCTGCCCTGAAA

>292

AGATGGTGAAGATGGTCCCACAGGCCCTCCTGGTCCACCTGGTCCCTCCTGGCCCCCT  
GGTCTCGGTGGGGTAAGGTGTCTTACGTATTGCTAACTTTTAGCTAACTTCAGTTGAAA  
GAAGGTTTATTGTGGAATTTATT

>293

TCCTGCTGGTCCC GCCGGTCCCCGTGGTGAAGTGGGTCTCCAGGCCTCTCCGGCCCC  
GTTGGACCTCCTGTAAGTAGCCACTGTCTTAACTTTATTGAGTAAAAGAAAACAAA  
GGTGGAGTATGGGGAAGAAGAAGA

>294

CCTCCCTGGACCCCGCGGTATTCTGGCCCTGTTGGTGCTGCCGGTGCTACTGGTGCCA  
GAGGACTTGTGTAAGTGGTCATGACTGTGGTTCTCATCATCCTGAAATACCACCTCTG  
CCATCATTTCATCACTATCTAG

>295

TGAAGAAGGAAAGAGAGAGGCCCTAATGGGGAAGCTGGATCTGCCGGCCCTCCAGGACC  
TCCTGGGCTGAGAGTAGGTTTCAAATGCTCCCAACACCCTAACACACCAGAGGCAGAT  
TATGATACCCCTTCATTGGGAATTG

>296

CCCTGCTGGAGTCCGAGGACCTAATGGAGATGCTGGTCGCCCTGGGGAGCCTGGTCTC  
ATGGGACCCAGAGTAAGTTTCAAACCTGATTCTGAGCAAATCACACCTGGCATTACTTCC  
TTCTTTAAAGGGTTGGTTAATAT

>297

CCCAATTGGCCCCGTTGGAGCAAGAGGAGAGCCTGGCAACATTGGATTCCCTGGACCC  
AAAGGCCCCACTGTAAGAATCACCACAACCTTCTTACCCTCAGCACTTCTGTAGCCA  
AATTTTACCAAACCTCTAGATTTA

>298

TGCTGCCGGTCCACTACTGGTCCCTATTGGAAGCCGAGGTCTTCTGGACCCCCAGGGCCT  
GATGGAAACAAGGTAATCTTATGTTTTCTATATTGCTGGTTTGGCCAGTCTGCCTG  
GAATAAGTAGACCCCTTACAATA

>299

TCCATCTGGTCCTAGTGACTCCCAGGAGAGAGGGGTGCTGCTGGCATACTGGAGGC  
AAGGGAGAAAAGGTACGTGTTGACCCCTATTACATATTGTTGATGAACTCTAGTAAAGA  
AGGCTGCACAAGGATGCCCAAGT

>300

AGGCAAAGGGCCTAAGGGTGAAAACGGTGTGTTGGTCCCACAGGCCCGTTGGAGC  
TGCTGGCCCAGCTGTAAGTTGAATTCAGTGGTGGTCCACACAGCAGCTACCCATTAGAT  
CTTCCAATTAATATATATCCGTC

>301

AGAAGTAGGTGCAGTTGGTCCCCCTGGCTTCGCTGGTGAGAAGGGTCCCTCTGGAGA  
GGCTGGTACTGCTGTAAGTGATTTCCAACCTCTTTCTTAATACCTTATGCTGAATTAA  
AATAAAGCCCTACACAGATCTT

>302

TGCTCCTGGTATTCTGGGTCTCCCTGGCTCGAGAGGTGAACGTGGTCTACCTGGTGTG  
CTGGTGTGTTGGTGAAGTCTTGACAGTATTCTGACTCCATTAACATAAGAAAAGATTTT  
AAAAGCTGCCACTTCAAATGTG

>303

GGCCCGTGGTCTCCTGGTGTGTTGGGTAGTCTGGAGTCAACGGTGTCTCCTGGTGAA  
GCTGGTCGTGATGTGAGTCCAACACTTGGTTTGAAAATAAACTGAGCAGGATTTTCAT  
TGTGTGAAACTTTATGCCTGAG

>304

TGCTGCAGGTGCACCTGGTCTCATGGCCCCGTGGTCTGCTGGCAAACATGGAAAC  
CGTGGTGAAACTGTAAGTTTGTGAATACCAGTCCCTCAGTGCAGCATTCTCGTGGGCTT  
CACTTCTGACTTCCCCACACTTG

>305

TGAAAAGGGGCCAGAGGTCTTCTGGCTTCAAGGGACACAATGGATTGCAAGGTCT  
GCCTGGTATCGCTGTAAGTAACTGTAGCCATCTCGCACATAAACTGATCCTGAAGGCC  
TTCAGCTCAGAAGGATTTTCATAT

>306

TCGCACTGGACATCCTGGTACGGTTGGACCTGCTGGCATTGAGGCCCTCAGGGTCAC  
CAAGGCCCTGCTGTAAGTATGATTTGGGGAAATAATAAAGAAGATCACGGACCTAAGG  
AATGTTTTCTCAGACTAAACCAA

>307

GAAGGCTCTAGAAAGAACCCAGCTCGCACATGCCGTGACTTGAGACTCAGCCACCCA  
GAGTGGAGCAGTGGTAGGTCAAGATGTCCAGACCAGACTGACCCTTCTACAAGTTG  
AGCTTTTCAAATAGTTTCCATTGA

>308

GAACTGGTATAGGAGCTCCAAGGACAAGAAACACGTCTGGCTAGGAGAACTATCAAT  
GCTGGCAGCCAGGTGAGGAATCCCACAAACACCTCTCCTTCTGCTAAATAATATTTGG  
TAGGACTGTTTGTTAATTATCTG

>309

TAATGATGTTGAACTGTTGCTGAGGGCAACAGCAGGTTCACTTACACTGTTCTTGTAG  
ATGGCTGCTCTGTAAGTAATAGTAAATATGGGAATAGCTTTGGGAAGTGGGATGGAGG  
GGGTTCTAACTTAGACTGCCCC

>310

CGCCGAGGGCCTGAGTGTCCAGTAGCCACCGCATCTGGAGAACCAGCGGTTACCATG  
GAGGGGATCAGTGAAGTCCAGTTTCAACCTGCTTTGTCATAAATGTACAAACGTTTGA

ACTTAGAGCGCAGCCCCTCTCCG

>311

GAGGAGTGAAGGAGTTCGTGTGGAACCCGAGGACGCACCAGTTTATGGGCCGCACC  
GGGACCAGCTGGGGTACGCAGGGCCGGCACGCAAGGGGCGGGGGAAAGCCGCGGGG  
CGACGCCTCGGGGGCGCAGGGTCCCGC

>312

ACCATGTGGGTGATGCTGCAGACTGTCTCCGACCATAACCCCAAGTACCAGGACCGAC  
TGCCACACCGGGTGTGAGTGTGGAGGCTCCCCCTGCCAGCTACTCTAACTGCTCTTGTG  
CCCCAAACCTCCAGAAGGAACTC

>313

GTCATTGTCAATGTCAGTGACACTGAAAGCTGGGACCAGCATGTTTCAAGAAGCTCAACA  
AGTTCTTGAGCGTGAGTGTGGGCCCTGGTTATGTGTCAGTTCAAGACTTCGGGCAGGG  
GACTGGGGACCTTGAAGTGAAC

>314

CGGCATTGGGGACTCCACCCACTATGGTTACAGCACTGGGCAGCCCTGTGTCTTCATCA  
AGATGAACCGGGTATCTATGACCTTGGTCCCCAGGGTGAATGGAGGAAGGATCTGGGG  
ACACCACCTGCAGACAATTGCAT

>315

CTTCGTCATGTTCCCCGCCAACGGCAACATCGACCTCATGTACTTCCCCTACTATGGCA  
AAAAGTTCCACGTAAGTCCCAGGGGAGGCCAGGCTGGATGGCGGGTGCGGGTGGTG  
AGCTAGGGAAGGAGGCCGCGTTGC

>316

AACCAGAGCTGGGAAGATTGAACACCGACCTCGTCCCGGCCCTGCAGTCCGGATAC  
TCACGCCAGAAGGTAAGTGAAATCTTAGAGATCCCCTCCCACCCCAAGCAGCCCCC  
ATATCTAATCAGGGATTCTCATC

>317

CTACGTGCTGCCCTGCGCCCGCAGCCATGTGCCGCACCCTGGCCGCCTTCCCCACCAC  
CTGCCTGGAGAGGTAAGGGGAGGTTGTCCAAGTCTTGGGGGAAGTCCCACCAACTC  
TTAGGGAGTGGAGCGGCAGGCCTGG

>318

AATCAGAGCTGGGCTGCGATACTGGGAGTACTGGCAAGTTCGAGTGGGGCAGTAAAC  
ACAGCAAAGAGAAGTAAGTGTGCTGACCAGCTCAGGGCTCCGAGAGGGAAGGGAG  
TGGGAAGGGAGTCATGAGGAGGGAAAT

>319

AGCTACCAAGCTGGCCTCCAGGGCACACCAGATCTTTGAGGAGTTCATTTGCAGTGAG  
GCCCCAAAAGAGGTTAGAGCCCCATATGCCAGTGAATCCTCACGACCCTGCCTGCTC  
CTTCCCCTCTGAGAATCAGGGCT

>320

TTCGACGGCGAGCCGCAGCCCTACCCAACGCTGCCGCCTGGCACGGGCCGCCGATCC  
ACAGCTACCGAGGTACGGGCCCGGCGCTTAGGCCCGACCCAGCAGGGACGATAGCAC  
GGTCTGAAGCCCCCTACCGCCCCG

>321

CAAAGTGAATTATTTGTGCCATCTCTCAATGTTGACGGACAGCCTATTTTGGCCAATATC  
ACACTGCCAGGTAAGTACTGACGTTTTACTTTTTAAAAAGATAAGGTTGTTGTGGTAAGTACA  
GGATAGACCACTTGAAAAAT

>322

TTCAGCCATGCCTCACAGCTCCGACAGCAGTACTCCAGCTTCAGCCGCTCTCCTCCC  
CCTGGCAAACAGGTAGAGTCTCCTTTTCTCTCCTACCTTCTGATTCTCCTGGGGG  
ATGGAAAGAGAGCCAGGCTTCCT

>323

GGAGAAAAATCGTATTGCCGCCAGAAGAGCCGACAGAGGCAGACACAGAAGGCCG  
ACACCCTGCACCTGGTAAGTGTTAGATCAATCAACATCCACGTGAGCTTTAGGCTTTG  
CCCTCCGCCATCTGGGAACCCTTGG

>324

CTTTAGCGGCCACCGCCCTCCTGACGCACGGCCAAGAGGAAGGCCAAGTCGAGGGC  
CAAGACGAAGACAGTAAGTCCCAAACCTTTGGGAGTGCAAGGATACTCTATATCGCGC  
CTTGCGCTTGGTCCCGGGGGCCGCG

>325

GAGACCAAGAACTGCCCCGGCGCCGAAGTCCCCGAGGGCGAGTGCTGTCCCGTCTGC  
CCCGACGGCTCAGGTGCGGCTGCGCTCGGGGCCTGGGGCCTGGGGCTGGGGCTGGGG  
GTGGTCGGCGCTCGCTGGCCCTCCGT

>326

CCCTGGACAGCCTGGACTTCCCGGACCCCCGGACCCCCGGACCTCCCGGACCCCCT  
GGCCTCGGAGGAGTAAGTGGAGAGGCCTTGTGTGTCCACTCTCCCCTGTTTTGTTTT  
GTTTTTTGGCAGATGACATAATTT

>327

CTTTGCTCCCCAGCTGTCTTATGGCTATGATGAGAAAATCAACCGGAGGAATTTCCGTGC  
CTGGCCCATGGTGAGCCAGCAGGGGGAGCATGGATGACAGAAGAGAGAATGGGTAT  
CCAGAGGATGTGGGCATACGCGGC

>328

CTCTGAAGGTCCCAGGGTGTGCGTGGTGAGCCTGGCCCCCTGGCCCTGCTGGTGCT  
GCTGGCCCTGCTGTAAGTGTCCCGACTCAGTGTCCTTTGCCACTTTCTAACCTCAG  
AGTCCTTGCCTGTTGCTGACT

>329

CTTCCCTGGTGCCCGAGGCCCTCTGGACCCAGGGCCCCGGCGGCCCTCCTGGTCCC  
AAGGGTAACAGCGTGAGTACCAAACCTCTCCCTTCTGCCACCCCATGCACTGGCTCCA  
GTGCGGCTCTCATCTGGGGAGCAG

>330

AGAGGAAGGAAAGCGAGGAGCTCGAGGTGAACCCGGACCCACTGGCCTGCCCGGAC  
CCCCTGGCGAGCGTGAAGTGTCCCTGCCCGCCCCCTCCCACTCCACCCTCATTGCCTG  
GCTGGTGCCTGTGTGTCGCGGAGTT

>331

CCCCGCTGGCCCCAAAGGATCTCCTGGTGAAGCTGGTCGTCCCGGTGAAGCTGGTCTG  
CCTGGTGCCAAGGTGAGGCCCCAGGCTTTCAGCCTGGCTTGCCAGGCCCTGACCATC  
CCGTGTAGGGTCTGGGATGAGGCG

>332

ACCCCCAGGCCACCTGGTGCCCGTGGTCAGGCTGGTGTGATGGGATTCCCTGGACCT  
AAAGGTGCTGCTGTGAGTATTAAGTGAGGATCCATGAAGAGCCAGGGACAAACACAC  
CTGAGACTTGAAGGAGTCTGGGCT

>333

TGTGCAAGGTCCCCTGGTCTGCTGGTCCCCGAGGGGCCAACGGTGCTCCCGCAA  
CGATGGTGCTAAGGTGAGGGCAGCGTGAAGGGGCTCTGGCAAGTGGCCAGGGACC

AGGTCTACCCCTCCTGCAGCAGGGG

>334

CGCCCTGGCCTTCAGGGAATGCCTGGTGAACGTGGTGCAGCTGGTCTCCAGGGCCT  
AAGGGTGACAGAGTAAGTTCAACCTTCCCCTCCCCTGAGCCCTACATGGCTCCCATC  
TCTGCCTGCTTTGAATCTCTCAGC

>335

CAAAGATGGCGTCCGTGGTCTGACCGGCCCCATTGGTCTCCTGGCCCTGCTGGTGCC  
CCTGGTGACAAGGTGAGGTGGCCGCTCCCACCTTCTGCCCTAACACATAGCCTCCT  
CAGCAGGCCTGGGCACGGTCCGT

>336

TGATGCTGGTGCTAAAGGCGATGCTGGTCCCCCTGGCCCTGCCGGACCCGCTGGACCC  
CCTGGCCCCATTGTGAGTGGCTTGGCCCTCTGTGCCACGAGGCTGGTGGGCTGGGAC  
CCAGGACGGGTCCAGGCTTGATGC

>337

TGAAGTTGGTCCCCTGGTCCCCTGGCCCTGCTGGCGAGAAAGGATCCCCTGGTGCT  
GATGGTCTGCTGTAAGTGCCAGCTCAGATCTCTGCAGCTCCGGAGGTGTGCAGAGCT  
GGGGAGGGGTCCCTGTGCTGCTGT

>338

ACAGCGTGGTGTGGTGGCCCTGCCTGGTCAGAGAGGAGAGAGAGGCTTCCCTGGTCT  
TCCTGGCCCCTCTGTAAGTGCCCCCTCACCTTGGGGGGCCCTGAGAAAAACCATCAC  
AGGACTTGGAGTGGGGCGGAGCCAA

>339

TGAACGTGGTCCCCTGGTCCCATGGGCCCCCTGGATTGGCTGGACCCCTGGTGAA  
TCTGGACGTGAGGTGAGCAGTCCCAGCCCCATGCCAGTACCCTCAGCATGGCCATT  
GTGGCCTGCCTAAGCCCTCTCC

>340

TGCTCCTGGTGCTCCTGGTGGCCCTGGCCCCGTTGGCCCTGCTGGCAAGAGTGGTGAT  
CGTGGTGAGACTGTAAGTAGCTGGGCTCCAGTTCCTGTACCTGGTCAGGCCAGGGAC  
TCTTCAGGCCTCCTTAGAGGCCTG

>341

CGAACAGGGCGACAGAGGCATAAAGGGTCACCGTGGCTTCTCTGGCCTCCAGGGTCC  
CCCTGGCCCTCCTGTAAGTATGCTCAGCCCCTCCCAGTCCCATGCTGTGCTGTGGGA  
TAGGAGGGGGAGCTTCGCCTCAGT

>342

ACTCAACGGTCTCCCTGGCCCCATTGGGCCCCCTGGTCTCGCGTTCGCACTGGTGAT  
GCTGGTCTGTTGTATGTAGCCCCTCATCCCCTCTGCTCATGGCCCTCCAGCCCCATAG  
CACTTGGATGCCGGAATCCCCA

>343

GAGGGAAGCCGCAAGAACCCCGCCCGCACCTGCCGTGACCTCAAGATGTGCCACTCT  
GACTGGAAGAGTGGTGTGGGCTGCCCTAGCCTCTCCCTCCCTACTCCTGCCATGC  
CAGGGTCCCCTATGCCCATATGTGC

>344

GTACATCAGCAAGAACCCCAAGGACAAGAGGCATGTCTGGTTCGGCGAGAGCATGAC  
CGATGGATTCCAGGTGCGTGAGCTGGACCTCAGAGCCAGTGTTAGGAGATGGGCTAGC  
CCAGTGCTCAGAAGGGACATGAAGT

>345

CAACGAGATCGAGATCCGCGCCGAGGGCAACAGCCGCTTACCTACAGCGTCACTGTC  
GATGGCTGCACGGTGAGTGCCCAGAATCCCCAGGCAGGGCCCCACCTCTCCGGCCTTG  
GGCATTGTTGGCCAGGCCATAGTGC

>346

CGCCGCTACGGCCTCCCCCGCAGCCTCCTTGTTCCTCCAGGTGGTAGTGCTCGCTC  
TGGCGCAGATTGTAAGTTTCGAGCCCCTCCGCTGCCAGGGTCCAGGGTGCGGGGTCT  
GGAGTCCGGGATGGAGGAGCTCT

>347

TCCACCGGGAGAGCGGGGCCCCCGGGTCCCCGGGACCGCCGGGAGTGCCTGGATC  
CGACGGCATCGACGTAAGTCTCTAACCTGAGACCAGGGCGGGAGGGAGGCGGCAGAC  
AAAGGAGAAGTTTGTGAGCGCTGTGG

>348

TCCCCCGGCCCTCGAGGACTGGCCGGGAACCGAGGCGTGCCAGGACAGCCCGGGAG  
ACAGGGCGTGAGGTGAGTCGGGCCCGGGTAGGAGGTGCTTCTTAGGTAGATCT  
GTTCTGGGGTGC GGCTTACCCGCCA

>349

CACCTGGCCCTCGGGGCGTTCCTGGCATCGTGGGAGCCGTGGGTGAGATCGGCAACA  
CGGGGCCAAGGGTGAGTGCTCCTCTCGGTGGGCATGGGGGCCAGGCAGTGAGGAT  
TTGTCCAGGCCGCCCTTCCCAT

>350

GGAGAGAAGGGTGATCCAGGAGAAGTGGGACGGGGGCACCCCGGGATGCCTGGGCC  
CCCAGGGATCCAGGTAAGCCATTGGCCCTGCCAGCTGCAGTGTGTTCTCAGCTTG  
GGAATTAATGACGTGTGGACTGCG

>351

GGCTGGCACAGCTGCCTGCATCGCAGATCTCATCACCTTCTCTGGATACTGCTAAAG  
TCCGGTTACAGGTGAGGGGATGAAGCCTGGGAGTCTTGATGGTGTCTACTCTGTTCCC  
TCCCCAAAGACACAGACCCCTCA

>352

ATGAGCTTTGCCTCTGTCCGCATCGGCCTGTATGATTCTGTCAAACAGTTCTACACAA  
GGGCTCTGAGCGTGAGTATGGAGCAAGGGTGTAGGCCCTTGGCCCTTTTTTCTCAGT  
GATGATTGATCTTAGTTCATTCA

>353

AGATACCAAAGCACCGTCAATGCCTACAAGACCATTGCCCGAGAGGAAGGGTCCGG  
GGCCTCTGGAAAGGTGTGTACCAGTTGTTTTCCCTTCCCTTTTCTCCTCCCCGATAC  
TCTGGTCTCACCCAGGATCTTCCT

>354

GTCAACTGTGCTGAGCTGGTGACCTATGACCTCATCAAGGATGCCCTCCTGAAAGCCA  
ACCTCATGACAGGTGAGTCATGAGGTAGACGGTGTGGGTCTACCCTTCCCCATGC  
CAGGAGCAGGTGCGGGGTCTAGC

>355

AGTACAGTAGCGCTGGCCACTGTGCCCTTACCATGCTCCAGAAGGAGGGGCCCGAGC  
CTTCTACAAAGGGTGAGCCTCTGGTTCCCTCCCAACCCAGTTCAGGCCTCTGGCTATGC  
ATGTCTATTGTGGGTGGGAGAGA

>356

CCGCCCAATTCTGCCCTATTCTCTGCCTGGGAGATGGCTTCCCCGAGCCCCCGC  
CGGAGTCGAAGGTAAGTAAGCACCCCCCGGGATCCCGTTGTCTCGCCGCTACCCC



AGCTAGGCCGCACCACTGCTTTC

>357

CTCCAGGTGAAGCACCATTTTTGACCTTCCCTTGTGTCTTCTGTTCTGGCACAGTGCC  
TGGACCCCAAGGTACACGCTTAGAGAACCTCAAGGAATTGAATTGAATAGAGTCACAA  
GCCAGTGCAAATGGAAAATTGAA

>358

CTGGACCCAGCTCAGAGAAGCCTGTATAAAGATGTCATGATGGAGAATTATGGAAACC  
TGGTCTCACTGGGTAAGAATCTGCTGTTTCTCTAATTAATAATCTAAGAAGGTAGAGA  
GAAATCAGACTAACAGAACATTT

>359

AGCCGCACTCGCCGATCCTCCAGGCATGCCCCGCTACGAGCTGGCTTTAATCCTGAAA  
GCCATGCAGCGGGTAAGTGACCTTCCCTCAGAGCCGGTTTTCCCGCGGGCGCCCCC  
TGTGCTTGTGATGACCCCTATATT

>360

TCTACTTAACCCACCCACCAGATCTACCCTGTGACTCAGCCACTTGCCCCAGTTCATA  
ACCCATTAGTGTAAGTCCAAATTTACTGGCTTTGCTGTTTCATTCAAGATGTGTATGTG  
ATGGTAGAATAAAAGAATAAA

>361

ACGGACGAGGGCGCGCTGCATGGCGCGGCTGAGGCCAATTTCCGCATCTACCCCTGGA  
TGCGGTCTTCAGGTAGGCGCAGTCGCTAGGCGGGCCAGGCTGGCGGAGCGGGACCGG  
GAGCGGGGAGCGCAGCGCTGGGGAG

>362

GGCTGGTACCCTGGAGGAAAGCGAGCCCTCAGCTCAGCCCAGGATCCCCAGAATGCC  
CTTAGGCCCCCAGGTGGGTGTCTCCAGCCTCATGGGGAGGAAGAAAGTGATGGCCG  
GGGGCTCCCCACCTCCTGGAGCCT

>363

GCCCTGGGAGGGCAGGACCACGGCCCAGTGGTCCCTTACAGGAAGCGACACCTGGC  
ACGGACACTGCTGGTGAGTAGGGTGAGAGGTCCCCAGCATCAAGACCAGCCACTGGT  
CATCAGAGGCCATTGTGGCTTAGGGT

>364

CAGTCTTTAAACAAAAGCAAAGAATAAGCTTCGGGCGCTGTAGTACCTGCCAGCTT  
TCGCCACAGGAGGTAAGTGGATCTGGGAGCTGGGGGAACTGAGAAGACTAGCCAGAT  
ATTACATGTATTGCCAACTCAAAC

>365

TTGGATATCACTGATCCCCAGAGCGTCCAGCAGGCAGCCAAGTGGGTGGAGATGCACG  
TTAAGGAAGCAGGTAAGTATGGTAGACCACCAGGAATATGGTGTGGGGTGTCTGATC  
CCCACAGTACCCCAGGAGTCACC

>366

GCCTGGCAGCCAATGGTGGGGGCTACTGTGTCTCAAATTTGGCCTGGAGGCCTTCTC  
TGACAGCCTGAGGTGAGGGGTACAGGGCTCTGGGTTCCAGGACTAACAGCAGCCCAC  
TCAACAAACGTGGGCCAGCAGAGGT

>367

CTGCAGGCCTGCTGGGCACGGCTGCCTCCTGCCACACAGGCCCACTATGGGGGGCCT  
TCCTACCAAGTGTGAGTAGCCAGGCCACACAGGGGCACATGAAGGGAAACAAGTA  
CCAGAAAGGCCAGTCTGCATAAGC

>368

GCGGTGGAAAAGACCAAGCAGGGGGTGACGGAAGCAGCTGAGAAGACCAAGGAGG  
GGGTCATGTATGTGGGTAAGTGGGGCATGGCAGGGTGGGACAGTGTGGTGGCCAAAG  
GGTGAGTGCCAGTTACCTTCGCCAGAC

>369

CAACTGTGGCCACCAAGACCGTGGAGGAGGCGGAGAACATCGCGGTCACCTCCGG  
GGTGGTGCACAAGGTGAGCCCCGGCCCTCAGACCTGCCAGTCCTCTCCTGGGCCA  
GAAAGGCTGCTGGGCGGAGGCGGCAT

>370

GGACTTGAGGCCATCTGCCCCCAACAGGAGGGTGTGGCATCCAAAGAGAAAGAGGA  
AGTGGCAGAGGAGGTAGGAGCTGGGCTCCTGGGGTGCACCATGGGGGGTTCCTTGGT  
AGGGACCCCATCCCCACAGACGCAC

>371

TGGATGTGGAATATAATTGAATATTTTCTTGTTTAAGGGGAGCATGAAGAGGTGTTGAG  
GTTATGTCAAGGTAACAAAACCACCATTGTGGTAAAGACCACCAGGAGGGATAACTG  
AATATATGGCTTACAAAATGTTT

>372

CTATGAAGGCATTGTCGTTGCAATCGACCCCAATGTGCCAGAAGATGAAACACTCATTC  
AACAAATAAAGGTAAGTTTCATAGTAATTATCCATACTTTTTTAAAAATAGCATAATGTTG  
TGATAGAGAGAACATGAGTGC

>373

CATTTTGATTCTGAAACATGGAAGACAAAGGCTGACTATGTGAGACCAAAACTTGAG  
ACCTACAAAATGTGAGAATATCAAGTTCTTCTTTAAAATTCCACTTCTCCTGTAACC  
AAGATTTTTTAAAATCAAAATAT

>374

AAGGGTGAAAGGATCCACCTCACTCCTGATTCATTGCAGGAAAAAAGTTAGCTGAAT  
ATGGACCACAAGGTAAGAAATATTCTACCATACTTCTCATACAATTTAACTATTTTATGTT  
CAAAGTGATCAACACTAGCA

>375

GGGGAGTATTTGACGAGTACAATAATGATGAGAAATTCTACTTATCCAATGGAAGAATA  
CAAGCAGTAAGGTATGTATATTTGATTTAACTTGTTCCAAATTTTTAAATTGCAACC  
TTTTTTTCTGAATTGATTAC

>376

ATGTGAGTTTGTCTCCAATCCCGCCAGACGGAGAGGCTTCTATAATGTTGCACAAC  
ATGTTGATTCTGTAAGTACCTTGTCTCACCCCTCCCCAGATTCTTATGAATTTAGTG  
AGGCTTTTACTCCAAGTGCTC

>377

CACCTTCTCATTGCTGCAGATTGGACAAAGAATTGTGTGTTTAGTCCTTGACAAATCTG  
GAAGCATGGCGGTATGTTCAATGAGTCTTGGTCTTCTGGATGCTGGTCACAGATATGCA  
TGTTCTGGACCCTGACTCGGAA

>378

CGCCAAAAGATTACCTGCAGCAGCTTCAGGAGGGACGTCCATCTGCAGCGGGCTTCGA  
TCGGCATTACTGTGAGATGTGTTTTCTATTGTAGTTTGGAAATGTTGCAATTTATGTTG  
CTTAACAAAATTCCATTCCA

>379

GCCATCATCCACACAGTCGCTTTGGGGCCCTCTGCAGCTCAAGAAGTAGAGGAGCTGT  
CCAAAATGACAGGTGAGGGATGATTTGCTGAGACCCCGGTATTGTCTCTCCTACTGG

ACTGTGAGCTCCAGTGAAGTGGGG

>380

CAATGGCCTCATTGATGCTTTTGGGGCCCTTTCATCAGGAAATGGAGCTGTCTCTCAGC  
GCTCCATCCAGTTGGAGTTCTTAATCTTTGGTTTTTCATATTTACACATAATCATAGCCA  
AGATGGAGAATTTAATGGCT

>381

GAAGCAAGGTGGCTTTGTAGTGGACAAAAACACCAAATGGCCTACCTCCAAATCCC  
AGGCATTGCTAAGGTATGGAGTCAGCTTTTTTTCTTTCTCATAATTCAACAAGATAAAAT  
AAAGTTTTTACAGAATAATTGTA

>382

AGTGTACAGCCCTGATTGAATCAGTGAATGGAAAAACAGTTACCTTGGAACTACTGG  
ATAATGGAGCAGGTAATCACCCAAGAAATTGGAAGATATTTATTTCTTTTTCCAAGAAG  
CAACCAGGGAATGCCAAGAGGGC

>383

AACGCAGCCAGACGGAGAGTGATACCCAGCAGAGTGGAGCACTGTACATACCTGGC  
TGGATTGAGAATGGTAAGTAATTTGTAATAACATACCTGGCTTGTGCAAAGCATTGGT  
TTCAAGAGGAACTATTAAGCCTG

>384

GAAATTCACGGGGGCAGTCTCATTAATCTGACTTGGACAGCTCCTGGGGATGATTATGA  
CCATGGAACAGGTAAGCTGAACTGGTGTGGACCTGTAAAAGATTTACCAGCCAAGTAG  
AAGAGCAGAAGCGGGTGAGGCAG

>385

GTCTCCGAGGCTGCCCTGTCTCTCCTTGTCTCATCCTTATCATTACTTCGGCTTCTCGC  
AGCCAGCCAAGTGAGTCCACTTGTCTGTAGGGCAGGAACGAGAAAGGGGGATGGA  
GCAGCTGGCAGGGAGGTAGTCC

>386

AGAAAGTGTGCCAAGGAGACTAGTGGTGGGATACAGAAAGGCCCTCAACTGTCACC  
TGCCAGCAATCATGTAAGCACGTCCTTTTAGATATTTCTGTGGAGAGGGACAGGGAGC  
CCAGGGGCAGGAATGAGATACATGG

>387

AGTCAGCTTGCCGCCGGCGGCCAAGCAGCCAACCATGCTCAACTTCGGTGCCTCTCTC  
CAGCAGACTGCGGTAAGTCATTTGGGGATGCCCTGTGCTTCTCGCTGGTCTTGTCT  
GGGGGGCCAAAGGGGGCGCGAAC

>388

TTTTTACACAATCTCTACTTTGACCAAACGAGTCTGGACAGTTTTCTTTAATGGAAAAT  
AGGAGAAATGGTGAGTAGTACCATTTTTTTTTAGCGTAGTTCAAAGAACTTTACTATAA  
AACATTAGGTAGTTCTACAAA

>389

AGTATCTGATTTGTCAGAGGAAGAGAATCTGCTTCCGGGAACACCTGATTTTCATACAA  
TCCCAGCATTTGTAAGTATTATTGTTTTTAAGATAGACGTAAATTATATAATTTCTTAAAA  
TTTATATAATAAACTGTAGA

>390

AGCCACCCAGGATGTGGCAAGACATACTTTAAAAGTCCCATCTGAAGGCCACACGA  
GGACGCACACAGGTACCAGCCACTTCTTATATCTTTAGTGTTTTAAATGAAGAGATTTG  
GCTGTGATCACACATTTAAACCC

>391

GATCGTCAGCCTCGCAGTGGCCGACCTCCTCGTCGCCACACTGGTCATGCCCTGGGTT  
GTCTACCTGGAGGTAGGTGGGCCCTGCTTGCTCCAGCACTTTCTCCAGCAGGGCCC  
TGCACTGGACACTGGGGACTCTAG

>392

TCTTCGTCCTGACGTCATGATGTGCACGGCGAGCATCCTGAACTGTGTGCCATC  
AGCATCGACAGGTGAGCCCAGCCAGGGTGGGAAGAGGTTGCTCTGGCCACTCACCATT  
CTGGCTGCCCCAGCTTTTCTCAA

>393

ATGATCTCCATCGTCTGGGTCTGTCTTACCATCTCCTGCCACTCCTCTTCGGACTC  
AATAACGCAGGTACATTCTGCTTTTGTTCCTGAGGCTCAGCTGGCCCTGGGCCCTG  
CTCCCTCGAAGGGCCTGAGG

>394

ACGCCGAAGCGAGTCAACACCAAACGCAGCAGCCGAGCTTTCAGGGCCCACCTGAG  
GGCTCCACTAAAGGTCTCAAGACACCCCCAACCAACTCCAAGGGTCCCCACCTAACC  
ATTACCAAGAGGGCTCATCTTATGC

>395

CGAGGACATGAACTCTGCACCGTTATCATGAAGTCTAATGGGAGTTTCCCAGTGAAC  
AGGCGGAGAGTGTAAGTGCTCAGGCCAGGACCCAGAGCCAGGTCTTTCTGCCCTA  
GGGAAGCCCACTGGCCATGGTTCTG

>396

ACCATGAGCCGTAGGAAGCTCTCCAGCAGAAGGAGAAGAAAGCCACTCAGATGCTC  
GCCATTGTTCTCGGTGAGTCGGCCCTGGCTGCTGGCCACAGCCCGTCTGTGAAAGGT  
CCCATTCCCTGCCATGTCCTTCTA

>397

CAGCATTTCATCTGCTATGGCCATGGTTTTTCTGGGGACCAGAGGTAACACGGCAGCAC  
AGCTGTCCAAGGTCAGCAGAAACAAAAAAGGGTCTGCTTTCCTCCATCTCCCTAC  
GAATGGACAGTCTGCATGGAAAG

>398

ACGTGGAGCGTCTATATTCTGAACTTGCTAATAGATTATATGGAGAGAAACTTACAA  
TTTCCTTCTGTAAGTACTTTGCCCTTACATTCTAAAACCCCACTAGACAGTGCAGATA  
TTTTCCAGCACAATCAAGTC

>399

GTGGATTTTCAGCATGCCTCTGAAGATGCAAGGAAGACCATAAACCAAGTGGGTCAAAG  
GACAGACAGAAGGTGAGAGCCTGGGCAGAATGGAATCATTATGCGCTGGTCATGTCAT  
TCGTTTCCTCAGTCCGCCTTCCCT

>400

TTTCAAGGGAAACTGGAAGGATAAATTCATGAAAGAAGCCACGACGAATGCACCATT  
AGATTGAATAAGGTGAGGTGAGGTAACTGTACAGAGTCATGCATTGCTCTAAAAGAAT  
GCAGAGAATAATTTAGTGATTTT

>401

AGGCGAGGAGCTCAGCATGGTCATCCTGCTGCCGGATGACATTGAGGACGAGTCCACG  
GGCCTGAAGAAGGTATGGCTCCTGGGCTTTCATGCTTTGTGGTTCTTTCATGTCATG  
GTCGCATGGTAGGTAGGTGCTTG

>402

CACCTCTCCGCCCTCTGGCGCCCGGGCTCTGGCGAAGCTGCTGCCGCTGCTGATGG  
CGCAACTCTGGGGTAAGGTGGGGGACAGGGGGCGGGGAGAGGCGCCGGTGGGAGGC

ACGGGCGGGAGGGCAATGTGTTCCCG

>403

TCTCGTTCCACTGCGCGGGTGCCTGGTGGACCAGAGTTGGGTGCTGACGGCCGCGCA  
CTGCGGAAACAAGTAGGAGGAGATCCATCCCCGAGGACGCCACGGGGGGCTGTGGAG  
GCGGCCTCCAGGGAGGAGCGGGCAG

>404

CTTCTACCCTGGCGTGGTCACCAACAACATGATATGTGCTGGACTGGACCGGGGCCAG  
GACCCTTGCCAGGTAGGGTCTGAACAGGGAGAGTCTCTGACTCCTGGGAGGGAGGAC  
AGGGAGTTATGGGAAAAGAGCAGA

>405

CGGTGCACTTCCTCATCTTCTCACCATGCACGCCAGCAGCTTACGCTGGCCGCCGTC  
TCCCTGGACAGGTGAGCCAGCGCCTTGGCCTCCCTGGGAGATGGGCATCCACGCGGG  
GGATGGAGCGGGAGGCGGGACTGG

>406

GCTCCCGCCGCACCATGGCCAAGACCGTGGCCTATTTCTACGACCCCGACGTGGGCA  
ACTTCCACTACGGTGAGGAAACAGGGCTATGCATGAGGGGTTGGGACACGGAGTTTT  
GAGGCGGGGTTGCAACTCCAGGGG

>407

TATGAAGCTCATCGCCTGGCATTGACCCATAGCCTGGTCTGCATTACGGTCTCTATAA  
GAAGATGATCGTGAGTTCCGCCGCTCGGCCGGGGTTGGGGGTGGGGCGAGCTGT  
GGCCGTAGGGATAGGTGGGCTGG

>408

AGAGAGTCAGCCCCACCAATATGCAAGGCTTCACCAAGAGTCTTAATGCCTTCAACGT  
AGGCGATGACTGGTGAGGGAGGACTGGGAGTTTTGATGTCTAACAGTTTAATGCCAAG  
CCCTTCAGTGAGGTCTTTTGGCAG

>409

CGGGCTCTTTGAGTTCTGCTCGCGTTACACAGGCGCATCTCTGCAAGGAGCAACCCAG  
CTGAACAACAAGGTGACATAGTCCCAGTCTGTCTTCTCTTCTGATCCCTGGA  
CTCGGGATTTAACCTGATCCTG

>410

TTCTACCTCACTGACCGGGTCATGACGGTGTCTTCCACAAATACGGAAATTACTTCTT  
CCCTGGCACAGGTATGGGAATAGGGATTACTTTCCCTTTGCACCCTCAGCTCTTTACT  
ATGAGTGCCTCCTTCTCAGCC

>411

GAAGTCGGGGCAGAGAGTGGCCGCTACTACTGTCTGAACGTGCCCTGCGGGATGGC  
ATTGATGACCAGAGTAAGTACCGAAGTCTTCCCTCTGTTCCCTAGGCCCTTCTTTTCT  
CCTTGAAATAACCTCTTCTGCCT

>412

CAAGCACCTTTTCCAGCCGGTTATCAACCAGGTAGTGGACTTCTACCAACCCACGTGC  
ATTGTGCTCCAGGTAATACTGTCAGTTCTCCTCAGGAGTGTCTGCCTGGGCTTGGGG  
AAAGAGAGCAAGGGAAGAGGAGG

>413

AGAGCTTCAATATCCCTCTACTCGTGCTGGGTGGTGGTTATACTGTCCGAAATGTT  
GCCCGCTGCTGGTGAGCACTCTCCTGATTTCTCCCCTGTTGTCCAGTGTGAGCTAGGG  
TGTCCTCAGATATGGCCACAT

>414

GTACTTTGCCCCAGACTTCACACTTCATCCAGATGTCAGCACCCGCATCGAGAATCAGA  
ACTCACGCCAGGTCAGCAGCTCAGAAAAGCTGAGCACAACTTCTCCTGAAAGGTGG  
AGCCCAGGAGAGGTCAAAGATGTG

>415

ACCTCCTGACCTATGACAGGACTGATGAGGCTGATGCAGAGGAGAGGGGTCTGAGG  
AGAACTATAGCAGGTCTGGGAGCAGGGACTTCAGCCTACTTTCAATAGGCTTGCTGGG  
GAGGTTTAAAAGGGAAAAAGTAAAT

>416

GGACCATCGGAGAGCAGTGCAGCGTGTGTGGGGTCGAGCTTCCTGATAACGAGGCTG  
TGGAGCAGCACAGGTAGGCCCGCTCCAGCCCCGCACCTGATGTAGGACTTGAGGCC  
CTCACACCCCTCCTCACACCCTGGC

>417

GGGTGCGAGCTCTGCGGAAGCGGTTCTGGATAGTTTTCGGCTGAGAATGCACTTAC  
TGGCTCATTAGGTAGGCAAGTTCGCCTTAGTGGCCGTTTCAGATACAGGCAACCATCT  
CCTGCTTGCTTTACCCCTCCTC

>418

GTCTGTGATCAGTGCAGTGCACAGTTTTTCGAAGGAGGATGCCCTGGAGACACACAGG  
CAGACCCATACTGGTGTAGTTGACTTGGATTCTGTCTCCAGTTTTCCACAGTGTGG  
TAGCACATGGACATGAACTGTCTG

>419

ATCTGCAGTGAGTGCAACCGCACCTTCCCCAGCCACACGGCTCTCAAACGCCACCTGC  
GCTCACATACAGGTAGGTGAGTCCAGCTGATGGGTGGATCTGGGTCTCTGGGAGCCAG  
CGTCTATATTTACCTCCAAGGACG

>420

GAGTGCAATGGCTGTGGCAAGAAGTTCAGCCTCAAGCATCAGCTGGAGACGCACTATA  
GGGTGCACACAGGTACCGAAGGCCAGGGAGGGCCTGAGCTGGCTCTGGGACCTGGG  
CGGAGGTGGGAAGCAGATAGTCTCC

>421

TGGGTGTGAGGGACACATACATCCTAAAAGCACCACAGCAGAGGAGGCCAGGCAGT  
GCCAGGAGTCAAGGTGAGTGCACGACCTGACTGTGTACCAAGGGCCGTACCCCCAGA  
AACAGTGTGAGACCTGGCAGCACCGG

>422

CTGTGAGGCCCTAGAGCACCACTTAAGAGAAGAAGAGCTGTAAGCCGGCCTTTGTC  
AGAGCCATCATGGGTGAGTTTCTCAGCTGAGGCCACTGGCACTGTCCTCTCTCCCTC  
AGTCCTGTGGGATCCCATCATACCT

>423

GGAGAACAACAAACCCCGGAGCCGGAGCCAGGGGAGGCTGGACGGGACGGGATGGG  
CGACAGCGGGCGGGGTGAGTGTCCCGCAGCAGAAGGGCAGGGCAGCCATGGACCGCTTT  
ATCTGCGACCCCTCCCCACACCCTCC

>424

TTCCATGGGGTCCCCTGGTCTGCCCCCTCCAGCTCCCCAGGATTCTCCGGCCTGTCA  
GCAGCCCCAGGTGAGAGTTGTGACCACTTACTGCCTGGCCACTTTCATTTTCTGT  
TTTCCTTGTAACCCAGATCCT

>425

TGTCCACCCCTCCAGGTGGCCCTGGGGCTGGCAAACGGCTATGTGCAATCTGCGGGG  
ACAGAAGCTCAGGTATGTGGCTCAGAGGATGAACAGATAGGGAGAGTCTGGGCCATGT

ATCATCACCTGTGGGATTCCCAGG

>426

AAGCGCCAGCGGAACCGCTGTCACTACTGCCGCTATCAGAAGTGCCTGGCCACTGGCA  
TGAAGAGGGGAGGGTAAGGACGAGTCTGTCCACGCGTCTTAGACCACGTTCCCAGAC  
TCCCTATACGCCACTCGGACTGTGT

>427

GCTTGCTGTGGAACAGAAGAGTGACCAGGGCGTTGAGGGTCTGGGGGAACCGGGG  
GTAGCGGCAGCAGCGTGAGTGTGGGGTCAATCCACTCTCCTTCGTGATGGGGGTTGG  
GGGAGGCAGTCTAGGTCTGTAAACA

>428

GAGTGGGCGAAGAGGATCCCACACTTTTCTCCTTGCCTCTGGATGATCAGGTCATATT  
GCTGCGGGCAGGTCAGTGACCTTGGATCCCTTTGACTTCTTGACATTTGACCCCTTTT  
GACTTCCCGATCTTTAGTGACC

>429

TCCTTGCCACAGGTCTTCACGTGCACCGCAACTCAGCCATTGAGCAGGAGTAGGAGC  
CATCTTTGATCGGTCAAGTGGCCCTCGGCTAGGCTGGCATGTAGATAGAGGGGGTGGGG  
CTATAGGCTGGTCCGTGTCCAAGG

>430

AAAATGCGTGACATGAGGATGGACAAGACAGAGCTTGGCTGCCTGAGGGCAATCATT  
TGTTTAATCCAGGTAAGAGGAGGATTACCTTTGTCTCTCAAGGCCAAGGCAACCTTGG  
AGCCTCCTCTTCTCCGAGACTCCT

>431

TCCTGCGGGAGAAAGTGTATGCATCACTGGAGACCTACTGCAAACAGAAGTACCCTGA  
GCAGCAGGGACGGTGAGATGGGGCTGGGGGGCACTGAGGCTCCCTTGGGGGTGGGG  
AGTGCTATGAGGATGTGTTCAAGGCC

>432

CCAGGCCCGGAGGACGAGGACTCCAGCCTGGATGAATCTGACCTCTATAGCCTGGCCC  
ATCCTACCTCGGTAAGGCCACTCAGCCATCTCCACGTCCTTCTCCTCTCCCGAAA  
TCAGGACCCACCCCTCTGTTC

>433

AAACTGGTGACCAAGCTGCAGAATTCAGAGAGGAAGAAGCGAGGGGCACGGCGCTG  
AGACAGAGCTGGAGGTAAGGAGTCGGGGGGCCAGAGAGCTCAAGGTGGTGCTTCTG  
CCATGAAGGACAGGCCGGAAGGTGTGT

>434

CACCATGGGGCGCCTGCAACTGGTTGTGTTGGGCCTCACCTGCTGCTGGGCAGTGGCG  
AGTGCCGCGAAGGTAAGAGCCCAGCAGAGGGGCAGGTCCTGCTGCTCTCTCGCTCAA  
TCAGATCTGGAAACTTCGGGCCAGG

>435

ATCGTGGTCACCTTCAACTACCGTGTGCGCCCCCTTGGGTTCTCAGCACTGGGGACG  
CCAATCTGCCAGGTGCGTGGGTGCCTTCGGCCCTGAGGTGGGGCGACCAGCATGCTGA  
GCCAGCAGGGAGATTTCTCCTCAG

>436

CAGTGTCTGAAGGTTACTGATCCCCGAGCCCTGACGCTGGCCTATAAGGTGCCGCTGG  
CAGGCCTGGAGTGTGAGTAGTGTGCTCGGGTTGGCCATGGGGTCTCGAGGTGGGGGTT  
GAGGGGGGTACTGCCAGGGAGTAC

>437

ACATGGACGGCCACATCTTCGCCAGCATCGACATGCCTGCCATCAACAAGGGCAACAA  
GAAAGTCACGGAGTAAGCAGGGGGCACAGGACTCAGGGGCGACCCGTGCGGGAGGG  
CCGCCGGGAAAGCACTGGCGAGGGGG

>438

CCCAGCCACCAATGGCTCTGAGCTGGTGACAGTACAGCTTATGGTGTCACTGGCCCAG  
CTCATCAGTGTGGTGAGTAGAGGTCCCAGGCTCTCTGCCAGCTACTGAAATCAGCCC  
CGCCAAAATGTGTTAATGCTTGTG

>439

TTGACAACATGAAGAAAGTTTCGGCTCCCTTCCAAACACATCTGGCTCCCAGATGTGGT  
CCTGTACAACAAGTAGGTGCAATGGGAAGGTTGGGGGAGACCATTGGAGGGCTCAGG  
GAGGGAAGGGTTCTGGGGAAAATA

>440

CCTCCGGGAGGCGGTGGACGGCGTGCGCTTCATCGCAGACCACATGCGGAGCGAGGA  
CGATGACCAGAGCGTGAGTGCCGACGGCTGGGACCCCGGGCGTGAGATATGGGGTCT  
GCCAGGGCCCGGTATCTGAAAAGCA

>441

GTCCTCGGCCAGAGCACTTCGACTTTGTAAAGCCTGAGGACCTGGACGGCATAGGCA  
TGGGCCGGCCTGGTGAGGGGACCCTGCCCGAGGCCCTGGTCTCTGTCCACAGCCT  
ATCAGTTGCCTTCCCCACCACAA

>442

CCAGCGCAGACTGTCCGAAGCTCTGAAAAGGCTACGTTCTGGGCCTAAGTCTAAGAAC  
TGGGTCTACAAGGTGTGTGTTGTAGGTGGGCAGCTTGGGCCTGGGAATGAGGTGGCTT  
GAGGGGCAGGGAGGGGGGCGCAGG

>443

GGAGCTGCTGGGTTCAAGGCTCTCGGTGTGGTGACCGAGGGCTGTGGACGCTGCC  
CAGTGGCAAGAGTGTGAGTGTCCAGGGAGCCCGCTTCATCCAGGCCAGCTGCCCCCT  
CTGTTCTTCATGCCCGCAATGCCTAA

>444

CATGATGAACTTGAGCACCCACACGTGCTGCGTCTGCACGGCCTTGTACTGGGCCAG  
CCTCTGCAGATGGTGAGCAGATCCAGCCGCTGGTTCCCGGGACAGCCGTGCGGCAGG  
AGCGTGGGCGGCCAGGGTCCAATGG

>445

TGGTGCGCCTCTGGGCGGTGCCCGGGGCCGCTACGTCATGGGCGGGCCCCGCCCTAT  
CCCCTACGCCTGGTGAGAGCGGGTCCGCGGGCGGTGGGGCTCTGAGCCGGGCGGATC  
CGGAGGGCAGCAGCCGAGGGAGATC

>446

CTTGCGCTGCTGGGCCCCCACCCTGCCGACCGGCCTAGCTTTTCCACCTGGAGGGG  
CTGCTGCAAGAGGTGGGAACCCCGACCTACCAGATACACAGTCCCTCTTCCCTCCA  
TTCGCTCTCCAGGGTTCCATGCG

>447

TGAGGGATGTACAGAACCAGGCGCCCTGAGGATGGAGACTGGTGACCCCATCACAG  
TCATCGAGGGCAGGTGACAGTCCATACCTCCCAAGCACCCCTCAGGAGGAGGATACCC  
TCCAGCCTAATCCTGATCCCTTC

>448

TGCCAGCCACCCGTCCAGTCCACAGAGGCACCCCTGCCCGGGGAGATCAACACCCAG  
GAAGCATAGATGGGTGAGGACCTGAAAGGGTGAGGGCAGGGGTTGGCTGGGAGAACT



GATGAGGTCCAGGAGCTTCTCTGGAA

>449

AAGGCAAATCTTTGGGATGCGCCCCAGCACGGGGCCAGAGGAGGAACATGCCCTG  
GAGAGGATGAAAGGTGGGTGTGGTGGACTCCAGAGTCTCTGAGGAGATCAAGACCAG  
TCCTTCAATTCCGACCCCCTGCCTA

>450

AGCCCGTAAAGCCGCTGCCCTCTCTGGAGGCCTCTGTCCGATCCTGAGTTGCAGAGG  
AAGATTATGGAGGTGAGGTCTCACTGAAATGGCCTGGTGTCCAGAAGGGGCTACAGGC  
AGGGGCAGGGCCTGAGTGAGGCT

>451

CCACCAGGAGTGCCAGACAGCACTAGGAGCCACTGGGGGAGATGTGGTTTCTGCCAT  
CCGGAACCTCAAGGTAAAGCCAGCCCCTTCTCTTGGGGTCCCTCCTCCTGCCCTG  
CCGCCTGGCAGTCAGCTGCAACCCA

>452

GCTCACACAGCTCCTCCTCAGGCAACGGCAAGGACTCAGCCCTGCTGGAGACCACTG  
AGAGCAGCAAGAGGTGTGTATGGATGTGTATGTTGGGTCTAGGAATGGTCTTGTGAGC  
AGGCAGAGCTGGGTGACAGGCCTCG

>453

GCAGTTCATTGCCTACAGCCTCTGAGTGCCAGCTCAGAGCAGGACAACCCGTCCAC  
CAGTGGCTGCAGGTACGTGCGGTGAGGCTGGAGGAGAGGTCTGGGGGCCAGGCCAC  
ACTCTGGGACTAATGTCTTTATCTC

>454

CGGGGCAAGGGCCGCTCTGGGACCCTGGCCACGCTGCAGTACGCACTGGCCTGTGTC  
AAGCAGGTGCAGGGTAAGTGGTGTGTCCCAAGAGGGAATGGCCTGGGCCTGGGCTCC  
CGTGTTGAGGCAGCCTCCTTACTGAA

>455

CATGGACATGTCCACCTATACCCTGGAGGAGCTGGAGCACATCACGTCTGAGTACACA  
CTTCAGAACCAGGTGAGCGCGGCCTGGCCTCTGCATCCCGACGCACCCCTACTCCTT  
CTCCCACAGCTCTTGAATCTGCTC

>456

GATGTGGGAGTCTTCTATGGTTCCACTGCTCCATCTCGCCTGCCACCTGGGGCACAGG  
GGCCTCAGCAGGTGAGGTGCCAAGCGCTGTGGGGAGGCATGAGCAGTCCCAGGAAA  
TTCCTGCTGTGAGGGGCCGGGAA

>457

GTCTCAGATGGGGCCCTGCACAGCCGTGCTGCCTGCTGATTGCAGAGCGCATCCATT  
CGGGTTACGAAGGTGGGCAGGTGAGGGCCCTGGCCTGGTGGGGGCTGGGAGGAAGG  
ACATTTCTCATGGCCAGACATGAAT

>458

TACCCCTGACAAGAGGATTTCACTACGCGGCACACACCCAGCTGCCTCTTCCAGGA  
TGTGGATGAAAGGTGAGGATAGGACCTAGAGGAGACGAGGGCAGCCAGGGCTGAGG  
CCACGGCCACTCTGATGCCTCCTTCC

>459

CTGGGGGCCCAAGTCTCTGTTCTGCATCCTGAGGACCGACCCCTCATGCTGGCTAT  
CCACAAGAAGAGTGAGTTCCTCTCGCCCTGCTCGCCCTTCCACTGTCTGGGCTTTT  
GAGTGGCTGCCCTTGTGGTTGTG

>460

GCTGGGCTGGCTTTGTGACCCCTGGAGCCGCAAGGTAGCCTTCGTGTTGGGCCGCCA  
CAAAGTACGCACGTAAGTGGGCCATGCCCCGAGCTGGCGTTGGGGATAGGGCAGTG  
CGGTGGGGGACAGGACCGGGCCAGG

>461

CAGCCCAGCTCCCTCCCTGGACTGATATCCAGGAGCTGTCAGAGCAGATCCACCGG  
CTGCTGCTGCAGGTGAGAGTAGCGGAGAGGGAGCCTGGGAGGTGAGAAAAGGTGTG  
GGAAGCGGGGTCAAGCCATCTAACCT

>462

TCTCCACAGCCCTGGGTCTCCAGTGATAGCAACGGGGGTGATGCAGAGGGGCCTGG  
GCCTCCTGCGCCAGTGAGTGACCTGCTCCTACCTACCCTCTAATCGCCCTTCCCTCT  
CCTTCTTGAACCAGCACTGCCAG

>463

GTGAAGCACCAGGGCCAGCAGCTTTTTATTGAGTCTCGGGCCCGCCTCAGTCCCGGC  
CCCGCCTCCCTGGTGAGTTGATGATGATGTGTGGGTGAAGAGACAGACCTGGGGGGTC  
CCCTGACCTTACCCCCAACCCAT

>464

AGGAGGCCGAGAGGAAAGAAGCCTCCAGCTGCTCCTACCAGCAGATCAACTGCCTGG  
ACAGCATCTCAGGTAAGGCCTGCCAGGCATCTTCTCCACCTCGGGCTCTAACCTGC  
CCACCCAAGCCCTGCTCTGATGCC

>465

TCCGTACCAGTCAGTGTAGCTCAGCTCCACCATCGTCCATGTGGGAGACAAGAAGC  
CCCCGGAGTCGGGTATGGGTGTGGAATTGGGGGGCAGTGCTTGGGCTCCACCGGTCTC  
CCAGCTAGAGCTCCCTCCTGCCTT

>466

TTCCGAGACCTGGGCAGGCTGCGTGGACTCGACAGCTTCCACAGCTCCCTCAGCCC  
TTGGCGAGCGAGGTAGCCACCTGGGGCCTCCTGGAGCCTGCCCTCTGCCAGTCTAGG  
ACTGGATTGTTGGGGGTGGGTCT

>467

AGGAGGCCCTGGGAGCAGTGCCGGCCCCCACCTCCCAGTGCGGAGGCTGCTGAGCC  
AGAGGCCAGACTGGTGAGCACTGACCCTGCGTCTGCCTGCCAGCCCCACCCAGC  
CCGCCCCTCTGCCACCCTGTGCTGC

>468

GGCTCTGGCTTGGGCTCTGGGTCTGGTTCAGGCTCCCATGAAGGGGGCAGCACCTCAG  
CCAGCATCACTCGTGAGTACCCCGCCTCCAGCATCTCCAGGGTAGGGCAGTGATTGG  
GGAGCCGGGAGCCCAGGCCCGTC

>469

AGGATCCCATTGGCTGCTCATGGCCAATGCTGACCAGCGGTCATGATGACCTACCAG  
GTGCCCTCAGGTGAGGCATTTAGAGGCCTTCTTGGCCTTCCTTTCAGAGGTAGAGT  
GGGGGCAGTTTTCTTTCTGGGG

>470

GCGGCGGGAAGTGGGTGCTGTGCACTCCTGGGTCCGGAAGGGCCAAGTGCCTCGGGC  
TCTTGATGTGATGGTGAGAGAAGCCTGGGACGGGAGAAAAAGAATTGAGCTCAAG  
TTCAAGGGGAGAAAAAGAATTGAGC

>471

AAAGTTGCTGACCTCGCGTCCCTAAAGCCCTCTGCAGTTAGTAGTGTGACATCGTCTA  
CCTCCTTGTCAGTGAGTATCTGTCATAGCAGCCTGCCCTGCCCCACTCACAGGGGCCTT

GGGGATGAGGTTGCTTGCCTTG

>472

GCAGGGGTCTCCAAGGATGCCATCGTCACAGGCCCTGCCCCGGGTCCTTCCACCATG  
GCCTTGCCACAGTAAGTGCTTCTTTGCTGCTCTGGTCACTCAGGAACCTCTAGATTG  
TGCCAGGGGTCTGCTGTTGTG

>473

TCCAGCCCGCCCCATGCAGCGCTCTCCACACGCTGCGGTGCCACCCATATCCCGC  
AGAGTCTGCCAGTAATCACCCGACGGTCAGTGTGCCACGCGCACCGTGTGCCTTTGC  
CCTCTCACCCCTAGGTGCTTTGC

>474

GCTACCTGGCGAACTGGATTTCTCTCCGCCTGCCGGCCTGCCTGCCACAGCCGGAC  
TCCGCCACTCCGGTAGGATTCCCCGCCTGTCATTCCCTAGCCAGCTTTGGGAAACTG  
CAGAGGGGTCCAGAGGATTTGCA

>475

GCTGCCACCTTTGGGGCCGATGACTTGGTACTGACCCTGAGCAACCCCAAGATGTCAT  
TGGAGGGTACAGGTGGGTCTCAGCGGGGTGGGATGGGGCACGGAGTGGGAGACAGAT  
CCATCTAAGGGCCTGTTAGACAAAT

>476

GCCCTTGAGGAGCTGCGTCTGGTCTTTGGCCTCTGGGGGACCAACTCCATGCCCAGC  
TGCGAGACCTCAGTGAGTCCAGGCCCTGGAGGCTGGGGAGCAGCTCCACATGTTGA  
GCTGAGTCGAGTTCAGTGTGGCCGT

>477

AGTTGGATCATTGAGCTGCTGGAGAAGGATGGCATGGCCTTCCAGGAGGCCCTAGACC  
CAGGGCCCTTTGGTGAGAACCCGTTTTCTCCTTCCCTCCCCAGCCTGTCTTGTCCCATC  
CCTGCCCTCCACAGAGTGCTAG

>478

AGCCCTACCACCCCGGCAGCTGTGGCGCAGGAGCCCCCTCCCCTGGCAGCTCTGACG  
TCTCCACCGCAGGTGAGAGCTCTCTCTGGGCCACAACCTCCCTTCCCCGAAGTGTCCC  
TTGTTCCCTCTGGCTCCCAGCACC

>479

TCCCACTCCTCAGACTCCGGTGAAGTGACGTGGACCTGGATCCCACTGATGGCAAGC  
TCTTCCCCAGCGGTGAGTGCAGGGAGGTCCCAAGAGGGCGTCCCATTTAGCAATGCA  
CAGGGGGCCCGGCTCTTCTGCA

>480

AAACGAGGCCGGCCCCGAAAGCTGAGCAAAGAGTACTGGGACTGTCTCGAGGGCAA  
GAAGAGCAAGCACGGTGAGTCCGGGGGCACGTGGGTCCCTCCCTGCGCCGGGCTGAG  
CGGCTTCTGGGGCACTGCGGGTTGTT

>481

TGGCCCAACTATGGGGCCAAAAGAAAAAGAACAGCAACATGACCTACGAGAAGCTGA  
GCCGGGCCATGAGGTGAGCTGGCGGCCAGGACCCTCACGATACAGCCGGACATGGGG  
ACAGGCGCTCACACTCCCACCGCCCT

>482

ACGAATTGTTCTGCTCGGGCGTCTGGTGCATCCGCAGTGGGTGCTGTCAGCCGCACA  
CTGTTTCCAGAAGTGAGTGCAGAGGTAGGGGGAGTGGGCAGGGCCTGGGTCCGGGGG  
CGGGGCCTAATATCAGGCTCATCTT

>483

AGCATTGCTTCGCAGTGCCTACCGCGGGAACTCTTGCTCGTTTCTGGCTGGGGTCT  
GCTGGCGAACGGTGAGCTCACGGGTGTGTCTGCCCTCTCAAGGAGGTCCTCTGCC  
CAGTCGCGGGGGCTGACCCAGAG

>484

CTATGACCCGCTGTACCACCCAGCATGTTCTGCGCCGGCGGAGGGCAGACCAGAAG  
GACTCCTGCAACGTGAGAGAGGGGAAAGGGGAGGGCAGGCGACTCAGGGAAGGGTG  
GAGAAGGGGGAGACAGAGACACACAG

>485

GGGAGGGGAGGCTTCGCGGAACGCTCTCGGCGCCAGGACTCGCGTGCAAAGCCCAG  
GCCCCGGGCGCCAGGTGAGGCCAGCGTCGCTCGCGGCATCGGGGCGCCCCGCTCCTT  
CCGCAGACCCCGAAGTGGGGCGCAGGG

>486

GTCATTGGCTTTGCTGTGGACCTGGCCAACGTCTGGCGGTTCCCCTACCTGTGCTACAA  
AAATGGTGCGGTAAGTCCCATCTCAGCCTCCCTGAGCATGCTGGCCGGGCGGGGGTC  
GTAGGTGCAGCCGGGGCCAAGGC

>487

GAGCTGGCCCTCGGCCAGTTCAACAGGGAAGGGGCCGCTGGTGTCTGGAAGATCTGC  
CCCATACTGAAAGGTAATATGCGGGTGCCTCCCTTACCCTGGCGCAGCGCGGATCATG  
GTGGTGACGCTGGAGCTTTCAAAG

>488

GTGACTCCAGTGGAGACAGCTCGGGCCTCAACGACACTTTTGGGACCACACCTGCTG  
CCGAGTACTTTGAGTAAGTGGGAGTCGGGTCTCGGGAACGGGAGAGATGGCGCAGC  
CAGGTCCCCATGGTAGCCCCTTGGT

>489

AGCCTGCCTGGTGCTGGTCATCGTGCTGCTCTACTTCAGCCTCTGGAAGGGCGTGAAG  
ACCTCAGGGAAGGTGAGGCTCGGGGGTACCAATTGGGCCTGTAGACATGGGGCCAC  
CAAGTGGACATGTGGCCGTGGCTGG

>490

CCTCCCTGGAGCCATAGACGGCATCAGAGCATACTGAGCGTTGACTTCTACCGGCTCT  
GCGAGGCGTCTGTGAGTACAGTCTGCTCACTGCTTACAGTCCACAGGGGCTCTGGCA  
TTCCCAGGTTTCCATATGCATTG

>491

CCCTGGGCGTGGGGTTCGGGGTGTGATCGCCTTCTCCAGCTACAACAAGTTCACCAA  
CAACTGCTACAGGTGAGCCCCTAGCAGGGCCAGGCAGGGGCCTCATCAATACTAGGGA  
GAGGTGCTGACTTCCAGAAATAG

>492

GTCGTCTTCTCCTTCTGGGGTACATGGCACAGAAGCACAGTGTGCCATCGGGGACG  
TGGCCAAGGACGGTGAGCCCCTCTGCTGCACCTGGGCCTGCTCCGTGTAGCACCAGC  
GCCGAGCTCTCAGCAAAGCCTTTT

>493

GCTCCCTCTGTCTCAGCCTGGGCCGTGGTCTTCTTCATCATGCTGCTCACCCCTGGGTA  
TCGACAGCGCCGTGAGTAACCCGACCGCCCGGCCCTGCTCCTCGGCAGTTGGGTTCTT  
TCCACCCGAGGGGGCCCTGCCCT

>494

ACACCGTGAGCTTTACGCTTTCATCGTCTGCGGACCTTCTCCTGTCCCTGTTCT  
GCGTACCAACGTACGTACCATCGCCGGCTTCGCCTTCTCCTGGTCATGTCTCCTTAGC

ACGTGGCACGGGGCGCCCTGGC

>495

CATTTTGCAGCCGGCACGTCCATCCTCTTTGGAGTGCTCATCGAAGCCATCGGAGTGGC  
CTGGTTCTATGGTGTAGTCCGGGGGGAGGCAGCCAAGCCGGCACCCCTTGTGGTGG  
CTGTGCCACTCCCCTTCTGAAAA

>496

GATGACCGGGCAGCGGCCAGCCTGTACTGGCGGCTGTGCTGGAAGCTGGTCAGCCC  
CTGCTTTCTCCTGGTAAGGGACCTCGGGCCACCTGCCCTTCCCCGTCTGCCACTGCC  
CCCACTCTGGCACCTGCCCCGAGG

>497

ACTGGCCTACGCCATTGCACCCGAGAAGGACCGTGAGCTGGTGGACAGAGGGGAGGT  
GCGCCAGTTCACGGTGTAGGTGAGGTCCCTGCTGGGCCTCTCTCGGGGAATTCAGAA  
TGATCCCAAGCTCAGTGTCTTAGC

>498

CGGGGAAGAGGAGAAGGCACCCGCGGAACCGACGGCTCAGGTGCCGGACGCTGGCG  
GATGTGCGAGCGAGGTAGGTGCAGAGCGGAAGCGAGCGAAGTGCGGCGTCTACGCC  
GCCGGGAGCCCCGAGGCTTGTGTCCG

>499

TGATGATGAAAAAAAATAGCAGAGAAACCTGACTGGGAGGCAGAAAAGACCACTGA  
ATCTAGAAATGAGGTAAGCCTGTGAGAATATTCAAGCCTTGCCGTTTTGGTTTTAATGA  
GATTTTGTGGCATTGACAGTTT

>500

GACAGATACTTCTTCTCTGGAAGACTTATTCCAGTTGCTTTCATCACAGCCTGAAA  
ATCACTGGAGGTAATTGGAACCTTGGCTTTATCCTCGCAGGAACATATCTGCACTGA  
CCTTTTGGTGAACAAATAACAAC

>501

GAAGTGTGGATTAATGGTAGCAGGGAAGTGCCTCCTCTCCCACCAGCACCATGGCT  
GGCATCGCTCAGGTGGGCAGGGTAGAGTAAACAGGAGGCATAGCTGCAGCTTCTGTG  
GCAGAGCTTGCCTTAACTTCTCATT

>502

GACTCATGAAGGTGTTTCGTACCCGCGAGGATACCCGCCGAGGGTAGGGTCGCGCTCGC  
CCGGGCGGCAGAGTAAGAGCCTCGCGCGCCGTGGAGGAGGGAGCAGGGCGGTCCCA  
GGGACCGGAGAGCCGGGCGGGGCGTT

>503

GTGGCGGGGGCCACGGCCTGCTCTGCCTCCTCTCCGACCACGTGGACAAGAGGATC  
CTGGATGCTGCAGGTGCACACTGGGTGGGCAGGGGACTTGAGGGTGGCTTGGCCCTG  
TGGGCCCCCTCAGCCTGTGCTGCTGGC

>504

CCAATCTCAAAGTCATCAGCACCATGTCTGTGGGCATCGACCACTTGGCTTTGGATGAA  
ATCAAGAAGCGGTAAGTGCAGCTTGGGATCTGGAGGGGGCCTAGAGAGAGGGGTGGC  
TATGAGAGAAAGAAGAGCTGTTGA

>505

CCGAAGTGCAGTCTCCCTGCTACTTACCACCTGCCGCCGTTGCCGGAGGCCATCGA  
GGAAGTGAAGAAGTAAGTGAACGCAGACCAGGTGCGGTGGCTCACGGCTGTAATCCC  
AGCACTTTGGGAGGCCAAAGTGAGC

>506

AAGCCCCTCTGGCTGTGTGGCTATGGACTCACGCAGAGCACTGTCGGCATCATCGGGC  
TGGGGCGCATAGGTGAGGCTCCACCGGCCCGCTTGCCCGCCCGGCTCTCACAGCGT  
GGTTTGCATCCCTGGCACCACGTG

>507

GTCCAGAGATTCTGTACACAGGGCGCCAGCCCAGGCCTGAGGAAGCAGCAGAATTC  
CAGGCAGAGTTTGGTAATAAGCCTTGATTCCCAGAAGCCTATCTGTGCCCAGTTGAAA  
GGCTGTATTTTCTCTCAATGGGGCA

>508

CCGAGGGACTCTGCAACAAGGACTTCTTCCAGAAGATGAAGGAAACAGCTGTGTTCA  
TCAACATCAGCAGGTATCCTAGGGCCACCTTACCCAGCAAGCCTGGAGAGGAGCCATC  
CCCACTGCTGCCATCTGGAGATTTT

>509

GCTGGACTGGATGTGACGAGCCCAGAACCACTGCCTACAAACCACCCTCTCCTGACCC  
TGAAGAACTGTGGTAAGAACTGCACTTTCTGATGCAAACCTCCCTGCTGCCCTGCAGGA  
CCAGTGTTTTTGGAGGGGGTCCCAA

>510

CCCGAGGCCGTTCCGGGTCTGAACTGTAACAGGGAGGGGCCTCGCAGGAGCAGCAGC  
GGGCGAGTTAAAGGTGTGTACGTAGTTTTTCTAAATAGGACAGCGCTTTGCAAATTGGC  
TGTCATGGACTTGCTGTTTTGACA

>511

CAATGCCACCTTCTGCCTCATCTCTGGCCACCGTCCCGAGGCTGCCTCGCGCTTCTCC  
AAGCCCTGCAGGTACAACCCCAATTTGAGCATCACCCATCCTCTGTCCCCCAGCACTCA  
TGAGCTGGCAGGGTACCAACCT

>512

GCTGCCCTTCTCCGAGGTCATCGACTGGACCAAGGCAGCCATCGTAGCTGATGAGAGG  
CTCCCACTTCAGGTAGCTCAGAGCCCTGCCACAGGGTGGGAACTGGACCCAGGACA  
GGGGAGGGACCTAGAATCCTGGATC

>513

GGGGCACTCCTGGCCCTGTCTACTTTTTCCACAAGCCCCCAGGACTTCCCCTTCTACTA  
CCTGCAACAGGGTATGCCCTGGGGATGGGACAACCTGAAGTCCCCTCAGCTCTACCCA  
GGGCTGCCCCAGCCTCATCTGGA

>514

GGTGGGGCCCCCAGGCCAGCCCCCTCTGAAGCTCATCCAGGCGGTGGCAGGCTCCCA  
GCACTGTGCCCAGGTCTGCCCCCTCCAGCTGGAGTCCCTGGGATCCAGGGTGGGGGT  
AAGGGACAGGGCAGGGCCCTGATGA

>515

TGAGAGGCCACTCCCATCCAGGTGGCCGGAGACAGCTGTGCCCTTGACAGTCATTGAT  
GGGCACAGGAAGGTAAGGGATGAGGAGAGCCATGAAAGGGGTGGGCCCATGCTGGG  
AGCTGGGGGAGGGCACCCATGGGGTG

>516

CCCATATAGCACCATCAGAACAGATGCCATCCTCAGCCTCGATGCCCGCAGCAGTCTTT  
CCACAAGTGAGGTGAGGGCTGGGCCCAAGAGAAGCCAGTGTGGGTAGACACAGAG  
CCAGAGGGCCCTGGCAGCCCCCTCAG

>517

GCTGGGGCTACACTGCTGAGAGGACCAACGAATTCTCCATGGTTCTCACCACAGCCGC  
CTTCTACCATAGGTACAGACCCTACCCTGCACAGGGATCAGAGTATCAGAGGCCAGAG

ACCACCCCAACCGGAGCA

>518

AGCAGCAGTCACCAAGCTGCCCCCTATCAAGGTGCCCTATGGCAAGCAGCGCCAGGA  
GGCTGCTCCACTGGTGAGGGCTGAGGGGGATTGGTCGGAAGTGGCACGGATTGGGCG  
GGGATGCCGGAGAGATCCCTCTACT

>519

TGGGGGAATGGACCATCTTGAGAGGCTGCTAGAAGCCGCGGTGCAGCAGCACTCCA  
CTATGATCGGAAGGTAAGGGCGCAAGCCGCGGTGAGGGGGCCCCGTCGGGCGGCC  
CCCGGGAGTCCCTTCTCACACCTGGA

>520

TTCTCGTCAGGAAGCCCTCCGACCCCAATCGGAAGCCTAACTACAGCGAGCTGCAGG  
ACTCTAATCCAGGTGCGTTGGAGGGTTCTGGGCTCCAGGAGGTTGGGGGAGACAG  
GCGAAGGCTGCGTGGGGGGCACCTG

>521

GTCTGCGGAACCTGCGGAAGGCCTTCTTAGGCCCTGGCTGCTACAAGGCCATGTCC  
GGACCCACACTGGTACGTGCCCTCCAGGCGCCCCACCGTTGCTCTCTGTCAGCT  
TTTGTGAATCTGGGCTTGCTGTTC

>522

GCCACTTTCAGTCTTCAAAGAGAAAGATAAGAAATTCTGGATTTCAAATCCTTTTGA  
AGCCTTTAAGGTAAGATGAAATATCCTTTTACTCAGAACCAACTGATTCATTTAGAA  
AGAACTTTGAATTTCAAAGATG

>523

ATTATTATCCTAAAGAAAATGAAGATAATTACATATTTTTGCATTTGGGCAGTAGCATG  
GGCATTCCAGTAAGTATGCCTTTCTTAGAAAACCTTCTCACTTTGTTATCTTTTAAAC  
CTAACATTAATACAAAATGT

>524

ACCACTGGAGAGACATGTCGAAAAATCCATGAATTTGCATCTCCTAGCAAGATCAAAT  
GTGTCAGTACAGGTATAGGATGTAATATATTTTCAATTTTCTGAGTTGCTAC  
ATTCCATTAACTTCTCCAAGA

>525

AAGCAAACGCGTAGAAAATAGAATCACCAAAGAATCAGAGACACATGCTGTTGGGAA  
GAGCCAAGATAAGGTTAGTTTGTAAGCTGATTTCTTCAATGGCAGTTAAATTCTC  
CCCTCCATCTATTGATGCTAGCAC

>526

GGTGATTGTATCCAACCTCAGTCGCATCTACCACCAGAATCAACGAGCAGACAAACGA  
AGGGCACAAAAGGTGCGTATTCAACTCCGTGCAACCATGGTTTAGCACTTCCCACTTT  
TTATAATGAGCTTTAAAATTTCTT

>527

AGCCAAAAGCGGAAGCGCAAATGCTTACATGCAGAGCAAACGGAATGGTTTACTCAGT  
AATCAGCTGCAGGTACAATCAATTACATCTCTTTTTTAATGTTCAATTTCTGGTTAAT  
ATTGATTTAGTTCTACTTTCC

>528

TGTTAGCAAATCCGGCTCCAGCTTTGAAACCCAGCACCCACCTGCTTCACTGCCTG  
GAAAAACCACGGTAAGGAGACAGCATGACTGCCTTCCCTTGCTCTCTGACAGTAATT  
CCATTTGCTTTTGTGCATACTTAA

>529

ATCAAGGTAGTATAACAAGAACTCAGCACGATTCAGATCAGATGTGTGGAGAGAACACC  
TCTGTCTAACAGGTACCTGAGATTAATCTGTGTTGTCTACACACCTGTGCTGGTTCCCA  
GGGTGTGTCTTCTGCACTCATGT

>530

CTCGGTGCTCAACAGCCTGGTGGGGCCTGCCTGCATCTTCTGCGGCCAGCATTGCC  
GCCACCCAACCTCGTATGTACGGCCACCCGCCAGCCTGCCTGCCCTTGCCCTCTC  
CCACCAGCTCACCTGCCCTTGCC

>531

GGTGCCTGCATGCGGACCCTGGGCTACATGCCACCGAGATGGAGCTCATCGAGATCT  
CACAGCAAATCAGTATGTGCCTCGGACCCATCCCCATCCCCAGTCTCCAGATGCCCC  
GCTGGGCCCATGAAGCCAAGCAG

>532

GGGCCCCAAGCTGCTGGCAGAGACGGCAGACATGATCGGTGTCCGGGAGCTACGGGA  
CGCCTTCCGGGAGGTGCGGCCACTGGGGCTGAGGGCGGGCAGGGCTGCGTGTCTGCC  
GTGAGTGAGGGGCTGCGCGTGTGAAT

>533

AGCCAGCGGGAGGTGGACGAGATCCTCCAGGACGTGGACCTCAATGGGGACGGTCTG  
GTCGACTTCGAAGGTACCCCTGCCGCACATAGCAACACACGCCCTGGAAGGGTCTA  
GCAGATAAGAAACCGCACAGCAAGA

>534

TATGCTGGGAGCGGTGAAGATGGAAGGGCACGAGCCGTCCGACTGGAGCAGCTACTAT  
GCAGAGCCCGAGGTAAGCGCTCGTCTTTCCAGGGGAAGTGGAGCGGCGGCGCTCG  
CTCCTTCCCAACCTCAGGACCGCT

>535

CCAGGAAGATGTCATTGCCACAGCCAATCTGAGCCGCCGTGCTATTGCAGATATGCTTC  
GGGCTTGCAAGGTAGAAATCCTTGAGGCATTTCCGTGAGGCAGCTTTGGGCCAGAACA  
TAGTGGGAGAGAACTGTAGGGA

>536

TTGACAGGACATTCAAAGCGTGTGGCTGGTCCGTCACTGAGCTCATCCAGGCTGCTG  
AAGCCATGAAGGGTGAGGGGTGACCAGGGACAGGGACGGATGGAAAACCCTTATCAT  
GGTGTGATCTCTGCTTCCCTGGCTGG

>537

GGGAGCTGCAGCCGCCATTGAGGCTGCAGCCAAAAGCTAGAGCAGCTGAAGCCCCG  
GGCCAAACCCAAGGTACGTCTGCTCCCTTCCCTTCCACCCTCACCATGGCAGTGTC  
CCCACCTTCATCTCTGACTTTACAT

>538

TGCAGCAGCCACCAGTGCACTGGTAAAGGCTGCGTCGGCTGCCAGAGAGAACTAGT  
GGCCCAAGGGAAGGTGAGTGCTTAAATACCCAGAAGAATGGGGACAGGTTGGCACTT  
TGATGTCCACATCCACATCCATAGCC

>539

CACAGCCCAGCTCCTTGTGGCCTGCAAGGTCAAGGCTGACCAGGACTCGGAGGCAAT  
GAAACGACTTCAGGTGAGAACCCTGACCCATCCATTGTCCCTTGGGCTATACTGCTTC  
AAACTGTCACTCCCGAGATGTATG

>540

TGCAGCCTTTGAAGAGCAGGAGAATGAGACAGTGGTGGTGAAGAGAAGATGGTTGG  
CGGCATTGCCAGGTGAGCTTACCCCAGATGCTGAGGGACGCTGTCAGGAGGGCAG



TCATGTTGCCTGCGCTGGTCCCAACT

>541

GGAGAAGAAGGGACCCCAGGTCAGAGACTGGAGCCATTACTTCAAGATCATCGAGGA  
CCTGAGGGGCTCAGGTAAGGGGTAGGAGGGACCTCAACTCCCAGCCTTGTCTGACCCCTC  
CAATTATACACTCCTTTGCCTCTTT

>542

CTGTGGACAATGCCCCGATCGTTCTGCAGATTGACAATGCCCGTCTTGCTGCTGATGAC  
TTTAGAGTCAAGTAAGTTTGGGGGCTAGAGAGCTGGGGGTCCAGGGGTGGAGCTAAG  
AAGGACTGCTCCCCAGGCTGGGTA

>543

CATCCGGGCCAATATGACGAGCTGGCTCGGAAGAACCGAGAGGAGCTAGACAAGTA  
CTGGTCTCAGCAGGTGCGTGAGGGGAGGGGATGGCTGCCAAGGTGTGGGAGGGAGG  
CAGACGGAATGAGGGGCTGATGGACT

>544

GACGACGCTCACAGAGCTGAGACGTACAGTCCAGTCCCTGGAGATCGACCTGGACTC  
CATGAGAAATCTGGTGAGTGCCTTACATCACCTGCCAGCTCCTCCTTCACTTGGCCT  
CAGACCCAACCCTGTCTCAACCCA

>545

ACATCAAGGTCAAGCTGGAGGCTGAGATCGCCACCTACCGCCGCTGCTGGAAGATGG  
CGAGGACTTTAAGTGAGTGGGGCTCTCTACCCACACGTGCTGGGATCAGGAGATCAC  
TTCTCCCCAAAGTCTGAGCTTTTG

>546

TATGTTAAATGTCTGTCTCCAGAATATGCTGGAAAGGCTTTTAAAGCATTGCATGGCTCT  
TGTTTTGATGGTAAGAAATTTGAGTACTACAAACATTTTAAAAGATAGTTATAGTTTAA  
TTTTAAACTATACCAGATTT

>547

ACCGTAACGTGCTGCGCGACATGGGCCTGCAGGAGATGGCCGGGCAGCTGCAGGCG  
GCCACGCACCAGGTTGAGCCGCCCGGTTCCCTCCACCCCGTCTTTCCCTCCACCC  
ACACCAGCGCTTACCCCGGGGCTC

>548

CGCCTGGAGGAAAACAAAGACTTTCCAGAAAGAAGAGAGAAGCGGAAGCTATGAA  
AGCCACAGAGGATGGTAATGAACTTCCCTTCTACTTCTTTCTTGATGCATGGAGAAT  
GCCAGCACTAATTTTTTCTTCT

>549

GGCAAGCCGGTGATGGAGCGCTGGGAGACCCCCTATATGCACGCGCTGGCCGCCGCCG  
CCTCTCCAAGGTAGCCCCCGCCGGCCTGCACCGCCCCGGGGGCGCAGGGGAAA  
CTGAGGCCGGGGCTGCCCCGACCCG

>550

TTGGATCATCGAGTGCAATGACGGCGTCTTCCAGCGGCTCCGGGACTGGGCCCCACGG  
CAGACACACAAGGTGCCCTCTGCCCGCAGGCCCTCCAGGACCCCCACTCCTTGGGG  
TGAGGGCACTGCTCCTGGGGTTG

>551

GGGGCCGCTGCTCCCCAAAGCAGCACAGCAGTACCAGTCCCTTCCCCACCTCCACG  
CCCCTCCGAGAGTGAGTATCTCCCATGGAGTCCCTGCACATCAGTGCTCACGGATCTC  
AGAGCGCTGTCAGTCTCCACTGG

>552

ATGAGAAGGAGAAGGCCGAGAAAGCAGCGGCTCAAGGAGGAGCGGCGCAAGGAGAG  
ACAGGAAGCCCTGGAGTGAGTGTCTTGAGGCCATGCTGGGCCCGCCACCCTGCTG  
CTGGATTCCGCTCCTGGCCACTCTGATG

>553

TCAAAGGCCGGCAGCCCTGAGGTCCGGACCCACGCACGTTTCCACCCGGAATGCAG  
ATATTTTTAACAGGTCAGAGCCTGAGGAGGTCGGCCTTCACCCCTAGTGATGCTGGA  
GGCCAGCATCCTGAACCCTGGGGTC

>554

TGCCTACTGGGGTACCTGGAATAAGAAGACGGCACTCATCCGCGCGGAGACCCCTGG  
GCCCAGGACACGGTGAGCTAGCCCCAGAGTGCCTCCGTCCCCGTACCTCCTACTGTG  
CCCCTTCTCCAGCCCCAAAGAC

>555

CTATGAGGTGGACAGTGATGAGGAGTGGGAAGAAGAGGAGCCTGGGGAGTCCCTGTC  
CCACAGTGAGGGGGTAAGGATGTGCCCCAGCTGTCTTCACTCACAGACGGCTTGTGTT  
TGAGTCTCTGTCCACAGTGAGGGG

>556

GGATGAAGATGAGGACGATGGTTTCTTTGTGCCCATGGGTACCTGTCTGAGGACGAA  
GGTGTGACAGAGGTGAGGGAGTGAAGGGGGAGGTCACCGGCTCAGAAAAGTTCATT  
TCTGGACTGGTGCTCAGTGGCCTGA

>557

CTGGAGACCCTGCCGGCCAGGAGGAGCAGACGCCCAAGGCCTCCAAGCGGGAGAG  
GAGAGACGAGCAGAGTGAGTGTGGGCGGGGCCAGGCCACCCACCTGTTCTGGGCC  
AGCTAATTCCAGGGCTGAGGGCAAGAG

>558

GCTGAAGAGGAAGTCAGCGGGCAGCATGTGCATACCCAATTCATGAAGAAGCGCAG  
GCACGACGGCCAGGTGAGGTGGGGTGGGCAGGTGGGGCCTCTGCAGGGCTTTTCTT  
TTTTGTTTGTGTTTTGTTGTTTTGT

>559

CAGGCAGACACGGAGGAGGAGGAAGAGGAGGAGGGCGACTGTATGATCGTGATGTC  
CCGGATGCTGTGGGTGAGAAGGGCTGTAGATAGCAGAACGCACTGGTGAGGTGGGCG  
CTGGAGGTAACCTCAACAGAGAAGG

>560

GCATGCGTACCCTGATGGCCGTAGAGAGGAGCCACAGAGACAGAAAGTGGGAACATC  
AAGCAGATACCGGTAACCTCTACTGTTTTTTAAAGGAGGGGAAATTCCAAGGTATC  
AGTTGAGTCTGCACATATTGGGGT

>561

CCATTCGATCAGCTGGATCCTGGAACCTTTGATTGTGATATGTGGGCATGTTCTAGTG  
ACGCAGACAGGTAATACTACTGTGCTAAAGGAAGGAGCATGAATAGGCTGTCTTTTG  
TGATTGTGGAATGATAACAGAG

>562

CTATGACACGCCTTCAAAGAGAAAAGTCTTTTGAGATCGTGATTATGGTGCTAAAGG  
ACAAATTCAGGTAGGTTTTGGAGAGGGACAGGTTGAGTCTCATTAGTGAGCAGGAG  
TGCACAGGGGGCCTTTCACATT

>563

AGAGAAAATAGACTCTGGGCATTTATGGCAAAGTGAATATCACTCAATTGGTTTTA  
GCTTCAGCTCGGTGAGTGACCTTCCACAGCTTGGGGTCTTTTATGAGGATGGTTTCTGA

TGAGATGGTAGAAAAAATCTTC

>564

GGTTGAACACCCCATGGGCCCTGGACGAACTGTCGTCGTTAAAGGAGAAGTGAATG  
CAAATGCCAAAAGGTCAGTATCCTTCGGTACCAGTCACAGTGCAGATACTCCGTGCCT  
GTTACCGCCTTCTACCCGTGAACG

>565

TCAGGAGTCCTGGGGAGAAGAAGAGAGAAATATTACCTCTTTCCATTTAGTCCTGGG  
ATGTACTTTGAGGTGAGGTTCCAGTTTTTGAAAATGGGACAGCAATAAGAATCCTGGG  
AGCAGGGGTGGGATAAGTGGTCCA

>566

GGGTGCACGTGTGCGGCGGGTCACTGCTCAGCCCCAGTGGGTGCTCACAGCTGCC  
ACTGCTTCTCCGGGTGAGTGTCCGGGTGGCAGGGGCAGTCTCAATGTCCAGGCCCA  
GTGGGGCATGCGCCAGCGCAGAGGC

>567

GAGGCCTCAGATGACTTCTGCCCTGGGATCCGGTGCTGGGTGACCGGCTGGGGCTATA  
CGCGGGAGGGAGGTGAGGAGCCCCGTGGGGATGCTGGGATGGAGGAAGGCAAGGG  
CGGCCATGGAAGAGAGCTGGCTTGAG

>568

TCCCGCCCCGGGGCAGCATCATTAGCCCCGACATGCTGTGTGCCCGGGGCCCGGG  
GATGCCTGCCAGGTGAGCCTGCCAGGCCGTGACAGAGGATGGGGGCGGCTGAAGCCC  
AGGGAGGGGCTCCCCATCTTCTCGG

>569

TGAATTTTAGTTGGAAGCCTCTTTTGAGGCAAACACATACCAAGAGACCTACAAA  
AGAATATACGGGTAAGACGCAACTGAAAAGGACCCAGCACATCTGCTGGAATCTTT  
CCTTATCAGCCTGAACTGCAGGCC

>570

CTAATTAATTTAGGGGATCCTGATGCCACTTAGCAGTGGGATTTAGAGGACCTTTCA  
GAGGAGCTAAGGTAAGATGAGATGGAGGCAGAGTGGGGCAGGAAAGATGGCTTAGGG  
GCCTTTTGGGCTTTGTGACTC

>571

TTGCCTTGATTTCTTCAAAGACAACATAATCATTCAAAAATTCCAAGTTGGGTCCA  
AAATGTCAAAGGTAGGTATTGGACTCTGCCATGTGCCAGGTCATATGCCTGAGTCTGTG  
TCCTTCAACAGGCTGCCTTAT

>572

GGCGATGAGCACCCTACTGCTGCATTGTGCAGCACGCGGGGCTGGCGCAGCCCCTCA  
GGGTGGAGCTGGGTGAGGTCCC GCCAGGTGGTGTGCTCCTGGTTTCCCGTTGCCTTG  
TCTACTGCTGCGCCGGTCCTCC

>573

GTCTTGCTACTCACGGCAGCGGCTGTAGGAGGAGCTCTGTTGTGGAGAAGGATGAGG  
AGTGGGCTGCCAGGTGGGGGGCAGCGGGAGGAAGAGCCTCTGAGAGAGGGACAGAG  
ACCCAAGAGAGGGGCACACAGACCTG

>574

CGGAGCAGGTTGAGGACTGTGTGCTGACTGTGGAAGGAAGTGGCCTTCAAGAAAC  
AGCAGAAAGTCTTGTAAGTGCTGCAAGTGCTCAGCCTTCTCCTGTTTTTCCCCCTGA  
GATTAGCACTATCCTTCTGAACAT

>575

TGGCTCTCATCCCAGACTTGGCCATGGAAACCTGGCTTCTCCTGGCTGTCAGCCTGGT  
GCTCCTCTATCTGTGAGTAACTGTCCAGGCTCCTCTTCTCTGTTTCCTTGGACTTGGGG  
CGCTAATCACGCCTCTCTTTCCC

>576

TTTTAAGAAGCTTGAATTCCAGGGCCACACCTCTGCCTTTTTTGGGAAATATTTTGT  
CCTACCATAAGGTGAGTGTTTTTGAGCTCACTCTTTTGCTTCTTATGATTGCCAAGAGC  
AGCTTAGTTCATCAGTAAAAA

>577

TATCACAGATCCTGACATGATCAAAACAGTGCTAGTGAAAGAATGTTATTCTGTCTTCA  
CAAACCGGAGGGTAAGCATTATGTTGAAATTAATACTGATTGATTAAATTTATAT  
TTTGAAATTCTTATATATTCA

>578

TGAGGATGAAGAATGGAAGAGATTACGATCATTGCTGTCTCCAACCTTCACCAAGTGG  
AAACTCAAGGAGGTATGAAAATAACATGAGTTTTAATAAGAACTTAAAGAATGAATC  
TGGTGGGGACAGGTATAAAATAAG

>579

AGTATGGAGATGTGTTGGTGAGAAATCTGAGGCGGGAAGCAGAGACAGGCAAGCCTG  
TCACCTTGAAAGAGTAAGTAGAAGCGCAGCCATGGGGTCTGAGCTGTCATGAACCCC  
TCCAGCTGCCTGCCATGGAGCTGAT

>580

GACCCCTTTGTGGAAAACACCAAGAAGCTTTTAAGATTTGATTTTTTGGATCCATTCTT  
TCTCTCAATAAGTATGTGGACTACTATTTCTTTAATTTATCTTTCTCTTAAAAATAAC  
TGCTTTATTGAGATATAAAT

>581

AGAAGTTACAAATTTTTTAAGAAAATCTGTA AAAAGGATGAAAGAAAGTCGCCTCGAA  
GATACACAAAAGGTAAAATGTGGTGGTAGTTATAGGAGGATGTTTAGTTTTTCATAATTT  
TTTAGATAATATACATATGATC

>582

TGAACTGGCCACTCACCTGATGTCCAGCAGAACTGCAGGAGGAAATTGATGCAGTT  
TTACCCAATAAGGTGAGTGGATGGTACATGGAGAAGGAGGGAGGAGGTGAAACCTTA  
GCAAAAATGCCTCCTCACCACTCC

>583

TGATTCCAAGCTATGCTCTTCACCGTGACCCAAAGTACTGGACAGAGCCTGAGAAGTT  
CCTCCCTGAAAGGTACAAGGCCCTGGGAAGGGAGCCCTCCCTGAACCAGCCTGGTT  
CAAGCATATTCTGCCTCTCTTAATC

>584

CATGAACATGAAACTTGCTCTAATCAGAGTCCTTCAGA ACTTCTCCTCAAACCTTGTA  
AAGAAACACAGGTTAGTCAATTTCTATAAAAATAATGTTGTATTAATAATTCTTTTAAC  
TGAGTGGTCTGTATTTTTTAA

>585

TGTCTTGGCCATGGTCCCCTGGTGCTGCAACTCCTCTCCTTCACGCTCTTGGCTGGGCT  
CCTTGTCCAAGGTCAGGGGCAGGTTCTGAGGGTGTGGGGTCCCCACGCTGGCTTTTG  
GCTGTGGACACAGCCTGGGGCTG

>586

GGTGAGCTTCCAGAGAAATCTAAGCAGCAGGAGATCTACCAGGAGCTGACCCAGCTG  
AAGGCTGCAGTGGGTGAGTATCTGGAACCAGGCTTCTTGGGCCTGAGATGGTCGTTGT

GTGGTGTGAGTTTGCTTGAGTCACT

>587

GCACGACTCCATCACCGCCTGCAAAGAAGTGGGGGCCAGCTCGTCGTAATCAAAAAG  
TGCTGAGGAGCAGGTACACCTGGTGGGGATCCCCGTCCTGGCCTAGGGCATGGCTTCT  
GGCCAACTGGGGAGGAGGTGCTCAG

>588

GGATGGGACTTTCAGATCTAAATCAGGAAGGCACGTGGCAATGGGTGGACGGCTCACC  
TCTGTTGCCAGGTAGATCTCAGAAGGGGCACCCTATCCACTGGGGCTGGAATTGTGA  
AACTCTGATTTGAACTTTCCTGG

>589

GGCGCCCTGGTGCTGCAACTCCTCTCCTTCATGCTCTTGGCTGGGGTCCTGGTGGCCAT  
CCTTGTCCAAGGTCAGGGGCAGGTTCTGAGGGTCTGGGGTCCCAGGCCTGGCCTTTT  
GGCTATGAACAGAGCCTGGAGTG

>590

GGTGAGTTGCCAGACCAGTCCAAGCAGCAGCAAATCTATCAAGAACTGACCGATTTGA  
AGACTGCATTTGGTGAGTTCCTGCACATCAAGGGTCCTTGGCCTGAGATGGTCTCTG  
TGTGATGTGACTTTACTTGAGTTA

>591

GCACGACTCCGTCACCGCCTGCCAGGAAGTGAGGGGCCAGCTCGTCGTAATCAAAAC  
TGCTGAGGAGCAGGTACACCTGGTGGGGTCCCTCGTCCTGGCCTGGGGCATGCTTCTG  
GCCAACTGGGGAGGAAGTGCTCAGA

>592

GGATGGGACTTTCAGACCTAAATCAGGAAGGCACGTGGCAATGGGTGGACGGCTCAC  
CTCTGTACCCAGGTAGATTCTGGGAAAAAGGGACACTGTATCCAGTCCGGCTGGGTT  
CCTGCAACTCTGACTTGAGCTTCC

>593

TTCAGAGACGAATAGTTGTTTCCCTGCTAGCCTCAGCCTCCATTGTGGTATAGCAGAAC  
TTCACCCACTTGTAAGCCAGCGCTTCTTCTCTCCATCCTTGGACCTTCACAAATGCCCT  
GAGACGGTTCTCTGTTGATTT

>594

GGCAGGCCCGCGCCGCTTAGGAGGGAGAGCCACCCGCGCCAGGAGCCGAACGCG  
GACTCGCCACCCGGGTAAGCCAACTCGGGCGAGTGGGGGCCCGGCAGGGGACGCGT  
GGCCCAAGTCTGCGCCAGCCCTCC

>595

TTGGATCCTTCTTGACTCATAAATATTTAATCCAGAAGTATTTCAACCACAGATGGCA  
CTGCCAACAGGTAAGAAAACCTCATCCCTGTTACCCTGTTGTTCTGCTTTCAGTCTTAGT  
AAAATGCAGGATTTGTTAATA

>596

AGGCCATCCCATGGTGGACTACCTGGTGCCTCTAGTGAAAAGAACAAGAAGTCTTAC  
CCTCAGGTCAAAGTAAGTTTGTGGTAGCTCTCCTTCTATTTGAATTCTGGAAATTTGAT  
TTCCTACGATTTCCAAGGAATT

>597

GCCTGGTGGGAAAACACTGTGAGGATGGGATCTGCACTGTAAGTCTGGACCCAAGG  
ACATGGTGGTGGGTAAGTAGGGGTATATGATGCTGTGGAAGGTAGGAACAGATAGAA  
TATGGGATGCAGGAACTTAGAATGA

>598

CCTGGACTCTTGGTGCACCCTGACCTTGCCTATTTGCAAGCAGAAGGTGGAGGGGACC  
GGCAGCTGGGAGGTAAGCATCATTTTCTGGCCTTGATCCTCCAAGGGGTCCAGGCTT  
TGGTTTTTCATCTGTATGAATTATA

>599

CTTCCGGATAGCACTGGCAGCTTACAAGGCGCCTGGAACCCGTGGTATCAGACGCCA  
TCTATGACAGTAGTGAGTACTTCACTTCCAACAGGGGGCACACCAAGAATAGACTTCC  
AGCCCTGCCCTGCCATTTACTTGC

>600

ATGGACAGGACAGCTGGATGTGTGACTGGAGGGGAGGAAATTTATCTTCTTTGTGACA  
AAGTTCAGAAAGGTAAATACATTCTGTGATCTCTGATCTCAAGAGGTGTGATCTTGACA  
CACTACAGTTCTGAGTGTGTCTG

>601

TGAAGAGGAAGAAAATGGTGGAGTCTGGGAAGGATTTGGAGATTTTTCCCCACAGAT  
GTTTCATAGACAAGTAAGTATTATTATTATTAATCCTTATTATTTTAGAGATGGGAT  
CTCACTCTGACACCCAGGCT

>602

CAGCTTCGGAGGAAATCTGACTTGGAACTAGTGAACCAAACCTTTCCTCTACTATC  
CTGAAATCAAAGGTAAGTCAGTTGTTTAAAATCTTATGCTCATATTTATTTTATTTTATT  
TTTGGTTTTTGTGTTTTGTTTTG

>603

GCTGGAGCTGGAGGCGGAGGCATGTTTGGTAGTGGCGGTGGAGGAGGGGGCACTGGA  
AGTACAGGTCCAGGTACAAAATACTTATTCTTCTAAAACCTTTTCATATTGGAGAGG  
GTAGAATTTTCTTTTCTTTGGTTT

>604

GGATTTCTACTTATGGTGGGATTACTTCCATCCTGGAACCTAAATCTAATGCTGGG  
ATGAAGCATGGTAAGTAATGCTTTGTTCTTAATACCAAGAAAGGAAAAAATAATTAAT  
GCTAAAAAGGGTTTTTAAAAT

>605

ACCGTTGGGAATGGTGAGGTCACTCTAACGTATGCAACAGGAACAAAAGAAGAGAGT  
GCTGGAGTTCAGGGTAAGTGAGCACACAAATTACGTTCTGTTGGTTGGCTGGGGAGGG  
GTCAGTCCTAGGTGCAGAAAGATAT

>606

CAGGAGACGTGAAGATGCTGCTGGCCGTCCAGCGCCATCTCACTGCTGTGCAGGATGA  
GAATGGGGACAGGTAAGTCAGAACTTTGTCATGATAGGTTGCTCTGGGTGGGGAAGAA  
GAAGAGCATCGTATAATGCATACT

>607

GGATCTACTAGAAGTCACATCTGGTTTGATTTCTGATGACATTATCAACATGAGAAATGA  
TCTGTACCAGGTAAGCAGAAATCTCAAGAAAACAACCTGAAGAAAATCTGTAGTTTAC  
TTTTTCTTCTGTTATGTTTGGG

>608

GATAAAGTTCTCAGTATCTTACTCAAGCACAAAAGGCAGCACTACTTCTTGACCACC  
CCAACGGGGACGGTAAGAGACAATCACACATCATTGGTGTAACCTTCTCCACCTTCTA  
AATATCTACTAGGTATTTGATAAA

>609

CGGGCGCACAGCACTGCACCTGGCTGTGGAGCACGACAACATCTCATTGGCAGGCTG  
CCTGCTCCTGGAGGTGAAGGGCACACTTATTTGCTTTTGCATTAATTTCTGAGGGAGA

TTTAAGGAAATCTTTTCAAAGAAG

>610

GGAACCACACCCTGCATATAGCAGCTGGGAGAGGGTCCACCAGGCTGGCAGCTCTTC  
TCAAAGCAGCAGGTAAGATGGTGATCTGGCGGTCATTAATGAAAAATGTTACCAGGAA  
TGCAAACCCAACTTCAATAGAGCA

>611

GGAAAATGCAGGAGAGGATGAAGGAGTTGTGCCTGGAACCACGCCTCTAGATATGGC  
CACCAGCTGGCAGGTGAGTGCCGCTCCATCTGTCTGATGGCTGCCCTGAGGGAGTCA  
GAGGTTCAAGGAATGTAAGAACAGAT

>612

TCTGGGGATACTTAATAATGCCTTCCGGCTGAGTCCTGCTCCTTCCAAAACACTTATGG  
ACAACTATGAGGTAACACCTTACCTTACAGATTTAGCAATTTTCATTTGACTTTACTCTG  
TTAACATCTCTGGCCAGGGCA

>613

AGCCCAGTGAAGACCACCTCTCAGGCCCACTCGCTGCCTCTCTCGCCTGCCTCCACAA  
GGCAGCAAATAGGTAAGAAAAAGACAAAAGACAGTGGAGATATTTTCCAGCTCCCC  
CAGGCTGGTGTCTTCACTCTTTTT

>614

AGTGCAACCAATGGTCAGCCCGACCAACAGGCCGACCAAAAAGCACCTCAAAGAAG  
GAAAAAAGAAAGGTATGGAGAAATCCACTTGAAGCCAAGGAAGGGAGCTAGAGAT  
GGTACCCTGGAGAAATGTGAGATTC

>615

GATTGGCATTGATGATGTGCCAGATGCAAGAGGGGATAAAATGAGCCAAGACTCTATG  
ATGAAACTAAAGGTAAAAGGGAAATGAATGCTTTATCTGTATATTAAGCAAAAAGTCCAA  
GAGAGGGAATTATATTAGAAGCT

>616

ACAACACAAACAAAGGATCTGGGTCAACATTTCCCTTTCTGGGATAAAAATAATTGATG  
AGAAAAGTGGGGTAAGAATTCACATTTGCTGATACCTCTCTGACCACCTGAGTCTGAC  
CAACAATTTGCTACTTGAATTTT

>617

CCGGGCATTGGTTACGTGTGTGGAGGAGAAGGCCAGCATCAGTTTTTTGCCATAAAA  
ACCGGGCAACAGGTGAGCTCTAAGTCTTGACATAGACCTGGGGACTTGTCTCTGTGG  
ACATTGGAGTGTCTGTCACTCAAC

>618

ACATGACTCCATAGCCATTATCCCACCTCCACAAAGTACCAAACCAGGAAGAGGCAGA  
AGGACTGCTAAGGTGAATTGTCTTCTCCACATATCCATTAGCAGAGTGCATGTTCCGGTA  
CCAAAGGGTGGTGTGATGCAAGC

>619

CTGCAGCCCAACCCTCTGGATCTCTTCAAAAACAAGTGCTCCTGCCCCAGTGGGGCCCC  
TGGTGGGTCTAGGTAGGTGCCTAGAGATAAAATTAAGTATGACTCTTTTGTCTTTGCTCA  
TAAATGATGATGCATCGGAAG

>620

GTTGGCATTCTCAGGAGAATGCAGACCATGATGACTTTGATGCTAATCAACTATTGAA  
CAAGATCAATGGTAAGCCACTCACCCTCTGCCTACTGTTCCAACAACACTATCTCCACTG  
CCACATGGACCTAAATGAGTTC

>621

TACCAAATCTACTGACAATGCATTTGAGAACCCTTTCTTTAAAGATTCTTTTGGTTCATC  
ACAAGCCTCTGTAAGTATGAACTACTAGAAGCTCTTCTCCAAAGTACATGCCACATAGA  
GCTCCAGCCTCCTGAATTAAC

>622

TGGCTTCTTCTCAACCTGTATCTTCTGAGATGTATAGGGATCCATTTGGAAATCCTTTTG  
CCTAAATTCTGTAAGTAGAAGATCCTAATAAGCCTGTCTCAGGAGTTTTTGTGAGAAAG  
GGTGACATGGAATAAAGAGTG

>623

GGTGTCCCCACTACCCATGGCTTCCTCGGTACCCTTGGTACCCTAGGCTCCCAGGGCAG  
GTGAGGAGCAGGTGAGCATGGGCTTGGCTTGGGGGATGACAGGGAGTTCTCCAGT  
GGGGGCCAGCTCTCAGAATCAGA

>624

CTTGGCAACTTTCTGGCCCTTTGAAGAGGAAATGAAGGGTATTGCCGCTGTTACTGA  
TATACCTTAGGTAAAGTTCACTTAGAAGCTTTAAAAAAAAGTAATTAATTCCTTTTA  
CAAGTTTCCATTGAGGTGTGA

>625

ATTATTTCAATCAATATTTTTATGAATTATTTACCATTTGTACTTCAATAGTAGCAGAAGA  
CAAAAAGGTAATGTGCGCTGAGGGAGGGTGGGCAGCATGAAGCACTACATAAAGA  
AAAATCTTCTAAATGAAATTA

>626

AAACAACAAAAGTCTTCAAGGCTTCAAGCTTTGCTGGCTATGTGGGCATGTTAACA  
GGATTCAAACCAGTAAGGAGTCTGTTGTTACATAATTATACAGGTAGCCTTCTGTCCTG  
TTACCGTTATGTAAAAGTTGAAA

>627

GGATTCTGGGAAAGAAAGATGCCATGTGGATAGGGTTCTCACTAGAACAGTTCTGGA  
AAATAGCACAAAGTAAAGTGTTCGTTGCTTACTATTAATATTTATTTTAAATTACTCA  
TATTAATAAATAAATAATTT

>628

GAAACATCCCTTCTCCTTGATGATCGCAGAACGCCTGCAAAGATGTGTTTGAACCGC  
ACCAGCCAAGAGGTACCTTTGCAGGGTCATCTATAGAAAGAACTGTTGCCATTAAG  
ATTCCCTTGGTTCTGGCATTTC

>629

GGAAGCCATCGCCTGGCCCCGGCTCTCTGGACCTTGTCTCGCTCGGGAGCGGAAACA  
GCGGCAGCCAGAGGTGCGCGGGCGGCTTTCTCTGCCGCCTCCTGGGGACTTGGGCGC  
GGGAACTGCGCGGAGCCTGCGCTGGG

>630

AATGCTTCTCACCCGGAACAACTTGCCAGTTGGGTATCCTCCTCAGTATCCACCGAC  
AGCATTCCAAGGTAAAGCAGTTGCTGAAAGAAGAAAAAGTAAAATTAATTGAGAGAC  
AGAGAGAGAGAGTGAGAGTGGGAG

>631

AGGGGTACCATGGATGCCAGCGCCACAGCCTCCATTAACCTGTCCACCTGGATTAGAAT  
ATTTAAGTCAGGTAATTTCAAAGACACAAAATACTCATAAAAAACAGAACTGTGCTTC  
CAGCTTGCTTAACCAGATTAGCA

>632

TCAAGAAGTCATAACTCTGGAGAGACCACTAAGATGTAGCAGCTGTTGTTGCCCTGC  
TGCCTTCAGGAGGTCTGTGATCAATTACCAGGGCACTTTGTAAAATAGTTCAGCAAGAA



TTTCTGCCCTGTCATTGAACCTT

>633

AAGAGAGGATGTAATAAAAAATAAGTGGTCCATGTGTTGTGTGCAGCTGTTGTGGAGAT  
GTTGATTTTGTAGGTAAGAGATGTCATAATGTTTATAAGATTTGCTTTCCTAATATAAGAA  
GAATGTAATTTTGCAGGACATT

>634

TGGAATCCAGTTCCTTTAGACCTTGATGTTAAAATGAAAGCTGTAATGATTGGTGCCT  
GTTTCTCATTGTAAGTCTGTTCTTATAATCTTGATTATAGATGCTTCTCTAGGTTTCATT  
CTGAAATGATTCAGTAAAG

>635

CTGCTTACCCTGAAGCCTGGGGAGGCCATGTTTCTGGAGGCCAACGTACCCCATGCCT  
ACCTGAAAGGAGGTGAGCACATTTACAGCAGTGAGCCACTGCCATCCCTGCTGGGCC  
TGTTTCCCTATCTGGACAAAGGAA

>636

GAGTCAGGAAGACCCCTACCTCTCAATCTATGACCCCTGTACCAGACTTCACCATTA  
TGAAGACGGAGGTGAGTGAGGGGCTATGATGGGTGCCTTCGTGTGCCATGAAAATCT  
CTGGCAAGGGTCACGATGTGGAG

>637

TCAAGATTATAAAATAACCCAACGGATGGTCTGTGCTGGCTATAAAGAAGGGGGAAAA  
GATGCTTGTAAGGTAACCTCATGAGATTATGAAAACACAATAGGCTGCTTGAGAAAATTC  
ATTTCAAATATATTTTCCAATA

>638

CCAAGTCTGGTGAAGGCCACCAGGATGCCAGCGCCACGTAGCTGCAGGCACACA  
GCAGCCCTACCGGTATGTGAGCTGGTGGTGCCTCTGACAGCCTTCTGGGGGTCAG  
GGTGTCTCTGTGGGTGTGTGTGTG

>639

CATCCTCGCCCGGGACCCCATGAACCGCATGGAGATCTTCCGGCTCAACACCATTCCCC  
TGTTTGTGCAGGTGAGTCTGGGGCAGGTGGGCAGGAGAGGTCCCCCACCCTGCTT  
AAAGGGCAAGTTAGGAGTCCCAG

>640

GACGCCATTGATGCAGAGGGGGCCTCGGCCCACTCATGGAGTTGCTGCACTCCCGCA  
ACGAGGGCACTGGTGTGAGCTGGGGGAGGGCAGGAGGCTGGGTCCCACTCCCCAGCC  
ACGATGGAGGCTGGCCGACGTTTAAC

>641

CTACCGGAAGCGGTGTCCGTGGAGCTACCAACTCCCTTCAAGCATGACCCGGCT  
GCCTGGGAGGCTGTGAGTATCCTAGGTTGGACCGCAGTAGTTGGTTGTGCAAGTTGGG  
CACTGCCCATGGGCAACTTTTG

>642

TCTATGGCCATGCAGGCAGCTGCACTGGGTTCCCTCTATCGGAACAGCAGTTGTTGGAG  
GTCTGATGACAGGTGAGCATAAAAAGTGAACACTTCCCTGTATCTTATGCTCTCAGATT  
ATTTACAATAGATAATTAATGAG

>643

AATTCTAAAGTTGCCTCTCTGGGGACAGCCATCTGACCAGAACTGCTATGATGATTCTG  
TTTATTGGAAGGTACTGTACAGTATTCTAAACAAGAATGTGAACGATGACTCCATTAGT  
GAAAGCTTTACACACTTCAAGC

>644

AAAGGTGAAGTCTCGAGAAAGGGAGCAAATCAAGTCACTCAACAACCAATTTGCCTC  
CTTCATTGACAAGGTGAGTTTCTCTCTCATTGCACTGGTAGGGCTGCCGCTGGTCCACT  
TGGGATTGGTGCAGTCAAAACACA

>645

AGAGTGATCAATCTCGTTGGATTGCGAACTGAAGAACATGCAGGACATGGTGGAGGA  
TTACCGGAACAAGTAAGGGACCCTGTCTGGGCAGTTCTTAACTTTTGCTGTAAAAGAG  
TTCCAGAAAGTAATAAGCTAAGAT

>646

GGTGGACCTTCAGGCCAACTTGACAACCTTGCAAGCAGGAAATTGATTCCTTACAGCA  
CTCTACCAAGCAGTAAGTCTCCAGTTTCAACCAAGTTTATCTAAATGGAGAGTTTTTA  
AGCCTGAACCCACAACGATTGAG

>647

GATAGAAATTTCTGAGCTGAATCGTGTGATCCAGAGACTTAGATCTGAAATCGACAATG  
TCAAGAAGCAGGTATGTGCTTTCTCCTTCTACCACTCAGCTGTATGGAATGGGGTAAC  
CCTCAGGTAAAGGGCGAGTGCT

>648

TGAACACCAAGCTGGCCCTGGATCTGGAGATTGCCACCTACAGGACCCTCCTGGAGGG  
AGAAGAAAGCAGGTGAGGAAGGGACGCTGGGAGTGAACCTTCTCATGGTCTTCC  
TTCCTTGCAAGCTGATTGTTGTTGA

>649

GCCCACATTTATGCCACCCGCTCATCAAATGAGACCCTTCTGGAGAACCGGGCCC  
AGCAGCACTGGGGTAAGTGAGAGTTTGGGAAGGTGCTTCCCCACAGCATCCCTGAA  
CTTAGAAGTGTCTGCAAGAGAATG

>650

CTGTGTGGTGGGCACTCTGTTCAAGGCCATGCCGCTGCAGCCCTCCATCCTGCGGGAG  
GTCAGCGAGGAGGTGAGGCAGGGTGCTACACAGTGGGGCCGCCAGGCAGACCTGGC  
CTCCCACTAGAACACCTCCCTGGAGG

>651

CTGGTCTTGAAGATGAACTGCAGCGTATCAAATAAAAAGGCACCATTGACGTGTCAA  
AGCTGGTTACGGGTAGGGAGCCCAATGAGAGGATGTGGGTGATGCAGGTGAAGAGCC  
CAGCGGTGGTGTGTTAGGGATGGTG

>652

TTCTGGTGGAGGACTATTGCTTTGCTGACCTTGCTCCCCAGAAGCCCGCACCCCCACTT  
GACACAGATAGGTGAGCAGCAGTTCTCGGGAGCTGGAACCAGCTCATGGTCAGTGGA  
ATCTTTGAGTTGCACCTAGGAGGG

>653

CGTCTCCCGGGTTATCCTCGCTGGCAACCTCCTCAGCCACAGCACCCAGAGCAGGGAT  
TCTATCAATAAGGTATGGAGCCACCTGGCTGCATTCAGCCCCAGCCAGGAGCCTGC  
AAGCCTGTAAGACCCTCCTTCCCC

>654

CACCAAGAAAACCCAGGCAGCCAGCGTGGAGGCTGTTAAGATGCTGGATGAGATCCT  
CCTGCAGCTGAGCGTGAGCGAGCTGGGGGCTGGAGGGGTGATGGGGATTGCAGTCTT  
CAAAGCTGCCACTGGGCAACAGAAGG

>655

CGCTGGCCACTGCCTACTCCACGCTCCAGCTGGTCAACAACCCCTACCAGGCCACCAT  
TGATGGAGTCAGGTAGCTGGCACAGCCCACTTCAGTCTGACCCAGCCTTTTGCCTCA

GGAGGCACAAAGAAGGGAGGGGAG

>656

GATCACTTGGAGATCCTGGAGTGGACCCTGCGGGTCCGTCACATCAGCCCCACAGCCC  
CTGACTCTAGGTAACAGGCTCAGCCATACAGGGTGGGAGCAGAGGGCCAGGAGGC  
CTGGCAGGACCCTGAAGTGCACAGG

>657

ATCTTCCCAGAGTGCCCGCATGTCTACTTTTGTGGCAACACCCCCAGCTTTGGCTCCAA  
AATCATCCGAGGTAATTTTGTCTTCTGGGGGCCAGGCTGATTTGCTGATTTGCTCTCA  
CCTGGGGACAAGGTTACAGA

>658

AGAGTACCCTGAATACCAGCGTTGGATGGGCCTCAACGACCGCCTCAGCTCCTGCAGA  
GCTGTTTCTGTTGAGTCTGGGGACTGTGTACTCCCTCTGTTTCCCACGCCCTCTGTC  
CGCTTCTCTTGGCTTTTAGGTGA

>659

AGTTAGACTCCTTCGCTGTATCGTCTACTGATTCTTAAAATGTGACAAATCTGATTGGAC  
GACTTACATGGTACGGTGAATTTTGTATGTCCAGACTAAAGTGAGTCTTCTCTAGGCA  
AACAGTAATTTTGGTTAAAAC

>660

AGTGCCGGGAGGGCAACGCAGTCGCCGTTGCGCTGTGGCTGGACAACACGGAGAACG  
ACCTCAACCAGGGGTGAGCTGAAACGGTTGGTGGATGAGAGGAAGGCTAGAGATCTC  
CTGGTACGTGGAGTGGAGTGCTCAT

>661

AATGAACCGTGGGGATGACACCCCCCTGCATCTGGCAGCCAGTCATGGACACCGTGAT  
ATTGTACAGAAGGTACGTACAACTCCTTCGTCATCCACATCACATACATGCCATGAGG  
GTCAGTCACAGGCACTGTAACAT

>662

TGCAGTGAATGAACACGGGAATGTGCCCTGCACTATGCCTGTTTTTGGGGCCAAGAT  
CAAGTGGCAGAGGTGAGTACTCAGCCCTTAATTCCTGAGATGGGTAGGAAGTAAAGTC  
TGAGCCTTGGTGGGAGATTTTGA

>663

AGCATCTGTAACAAGTATGGAGAGATGCCTGTGGACAAAGCCAAGGCACCCCTGAGA  
GAGCTTCTCGAGGTCCATCTCCCATCCCCTAGCTTGTGTCTCTCGTCCCTTCCCAC  
CTGTCTTCTCCCTCTGTACCACAG

>664

ATGGGCCAGAATCTCAACCGTATTCCATACAAGGACACATTCTGGAAGGGGACCACCC  
GCACTCGGCCCGTGAGTCAACTGTGGGAAGAAGGGTTGAAAAGGAAATAATCC  
TGGCCTCTTGGGGCTGGGTTAGGGT

>665

CAAACACTCTGGCATTGACTTCAAACAGCTTAACTTCTGACGAAGCTCAACGAGAAT  
CACTCTGGAGAGGTGACCCTGCCCTTCTTGGCCTTCCCTACTAAACCCCATAAATT  
ACTTGCTTTGTACCTGTTTTAAG

>666

AGGTGCTGAAGGTTGAGACTGGAGTACAAGGAAGAGCAGGGACTTCAATGAAGAGT  
GTCCCCGGCTCAGGTAGTGAAGGCCTAACCTGGAAGCTGCTAGTTCCAAGGAACCCT  
GAATAGCACTGAAAGAGATCTTTTG

>667

CCTCATCCTACTCTCATCACACACTGGATGCCGTATGGATCCCTCTACAATGTACTACAT  
GAAGGCACCAGTGAGTAGGGATGTTGAATTTCTTGGGGAGGAAATGGCAGAGAGGG  
AGCCTCTCTGAACTATTTGACTT

>668

GGGCATGGCCTTCTACACACACTAGAGCCCCTCATCCCACGACATGCACTCAATAGCC  
GTAGTGTAATGGTGAGGCCACAAGCTCACTCCTGGCCCAGGCCCAAAGCCCTTTGC  
CTATCTATGACTTACCTCCTTCT

>669

ATGGCTGATGTCAAGTTCTCTTTCCAATGTCCTGGTCGCATGTATGCACCTGCCTGGGT  
AGCCCCGAAGGTGAGTGAAGTCATCATGTCTGGGAGGTAAAAAGGACCACCTCAGA  
AGTAGTGGAAGGGGGCAGAGACAG

>670

GCTTCTGTGGAACTGGTGACACGGGAGGTACCCTTTGCTGACCTCTCCAATATGGAG  
ATTGGAATGAAGGTGAGAGCACAACAGCATACTTTGTGTGCGGGAGTGGTTGGTGA  
TGGTGAAAATAACTGTAGTGGGCC

>671

TGATAATCCAAATGGAGATGGAAGATGTGTGACATGTATATATTATCTTAATAAAGACTG  
GGATGCCAAGGTATGCAACTTAATTGAGCATTATTTTTTTCTTACAGGTGTCTTTTTCT  
CAAAAGCATTAAAGTTTCATA

>672

TTGATAGACTGCTGTTTTCTGGTCTGACCGTCGCAACCCTCATGAAGTACAACCAGCA  
TATGCTACAAGGTAGTATTCCTTTTCAGAAAAAATTGGTTTAGAGTATGGTAGGACAGG  
AGGGAATCTGTAGAGTAAACGT

>673

CTTTCAAAGCAATTCACAAGTCCTTCTAGAGGTTAATGAAGAAGGCTCAGAAGCTG  
CTGCTGTCTCAGGTAAGTGTGCTAGAACTTCTCCCCTCTTCTAGATTTGTATTTTAGA  
GCAATCTTGAGTGGGGAGTGG

>674

ATGGCTGTGCTGTATCCTCAAGTTATTGTCGACCATCCATTTTTCTTTCTTATCAGAAAC  
AGGAGAACTGGTAAGTTTATTATGAAAACAAAATTTATTTAATAGGTCACAAAGAACC  
TCTTTTTTAAATGGAGATTTT

>675

GACTGCCTTCGGCTTTTTTTCTGCTGACTAAGATCTCCTATAGAGAGCTACAACAATGC  
CCAAAAGAAAGGTAAGTGAATGGAAAGACAGACGGGGAATGAGCTGCTGAGTTACC  
TATTTCTAATAGGAAGAATTTAT

>676

CAAGCAAGAAGCAGTTGTTGAAGAAGACTACAATGAAAATGCTAAAAATGGAGAAGC  
CAAAATTACAGAGGTATTTCTAATGTAAACAGTTTATCTATTTGAAAGTTTAAACAATG  
GGTACAACCTGAAAGAAATCCTAT

>677

GGCCTTCAACCAGAGGTTCTGTGGTTCTGCAGAAAACAGTCCAGGAGCACTATCAG  
GACTTTGACAAGGTGAGCCCGGGGTGCAGGTGGCAAGGGGCACCTTGCAGGGCCTGG  
GTGCAGCCCCTCCCTCCAGCTCCA

>678

CCTAGAGCCAGCGGCAACCTCATCCCACAGGAGAAGATTGTCAACCTTGTCAATGACA  
TCTTTGGAGCAGGTAGGAACCAGAACCTTGCCCCTCCATCCAACAATGCCTGCTGTTT

ACCCACAGCCTTGCCAGCCCCTC

>679

GCCATCTCCTGGAGCCTCATGTACCTTGTGACCAAGCCTGAGATACAGAGGAAGATCC  
AGAAGGAGCTGGGTACATGGGGGCCCAACCCTATAGCCAGGAGAAGCCTTGAAAC  
CCAGGTTGTTTGTTCAGTCTACAAA

>680

CCTACTTGGAGGCCTTCATCCTGGAGACCTTCGACACTCCTCCTTCTTGCCCTCACC  
ATCCCCACAGGTGAGGCCTGCCGTTCTGCCCTCCACCTCTAAAGTGCTTGCCATGT  
TTTCTCTCCTGGCTTCTCAGC

>681

CGCTGAATGGCTTCTACATCCCAAGAAATGCTGTGTCTTCGTAAACCAGTGGCAGGT  
CAACCATGACCCGTGAGTACATACCCCTCACGAAAAAATGTGTGCAGGTTCAGCAGTC  
AGGAAGGCTGTTTGTCCCTGCTAG

>682

AAGGGGAAAGTTGCACATTTATATCCTAGAGGGAAGCGACAGCAGTGCTTCTCCCTGT  
GCTGAGGTACAGGTAAGGAGGGTGGTTTGTAAAGTTCCTGAGGGAGGGTGATCCCTCT  
TTATTGTTCTAATATTATGCTCGC

>683

GAGGTCCGAGCCAGGGAGGACGACAGCATCCGCCCTTCAAGGTGGAAACGTCAGA  
TGAGGAGATCCACGTAAGGCACCTTGGGCCGGCCGGGCTGGGCAGTGGAGAGGGTG  
GTGTGTCGAAGACAGGGGTTGGGTCT

>684

AATGAATTTGACTGGAAGAAGCAGGTGGAGATTCTCAACAGACACCCTCACTTCAAG  
ACTAAGATTGAAGGTATGTTTGCAAACGCCAGCCAGAGAGGGATGTATGTCATGAGA  
ACAGCCTTCTCCACAATGTGACTT

>685

GAGCACGTTTTTGAAGTCATCTGCCCTTCCATCCCTGGCTATGGCTTCTCAGAGGCATC  
CTCCAAGAAAGGTACGGGGCTGCTAGAGGTTCCATAACTGCCCCGCTCTCGCCAAGGG  
TGGGCCCGGTGTTCCACCAGGC

>686

AGGAATTCTACATTCAAGGAGGGGACTGGGGTCCCTGATCTGCACTAATATGGCCCA  
GCTGGTGCCAGGTGAGGTCACTGTTGGGGTGGTGTGTGTGTGTGTGTGTGTGTGT  
GTGTGTGTGTGTGTCCTCTAAGAA

>687

AAGGTATTCTACAGCCTGATGAGGGAGAGCGGCTACATGCACATCCAGTGCACCAAGC  
CTGACACCGTAGGTGAGTGTGCTCAGGGGTCCTCGCCCACTGCCGGCTCCACTGGGGC  
AGGGAGACACCGCGGGTAACCTC

>688

ATATTCTAGAGAAGTTTTCCACCTGGACCAATACGGAATTCGATACCTGGAGGATGGA  
GGCCTGGAAAGGTGAGGCCCTGGTTTGGCCCTGCAGTCATGACCCTGGTCCCAGCAG  
CCAACCTCCTACCCTCTTCATC

>689

CCATCATCTCCTCCAGCGCTTCTACAAGGAGAACCTGGGACAGGGCTGGATGACCCA  
GAAGCATGAGCGGTGAGCCTGGCTGAGCCGAGAACAGGGGCTCTGAGGCTGGAGG  
CAGGGGGACGGCCAGTCTTGGGCTCC

>690

AATGATCATAGCACCTTGGATGGGTATTCCAGAAGAACCACCTTGTCTTCAAAAATGTA  
TCACACCAAAGGTAAGGATGTTAAGACTCATTCTTAGCACATCAGAAGTGTCTTTTGAA  
TTATTTTAGTGAAACGATGCAG

>691

GAGGGTGAGGACCGAGGAGCGGAGCAGATCAAGACCCTCAACAATAAGTTTGCCTC  
CTTCATCGACAAGGTGAGCTACGATCTTTTGTA AAAAATCACTGTGGGTCTGAAATAAA  
TGCCAAAGAGAGAGAAAGAAGGAA

>692

TGGGGGAACGGGGCCGCTGGACTCAGAGCTGAGAAACATGCAGGACCTGGTGGAA  
GACTTCAAGAACAAAGTGAGTTGGGGTGGAGGGTGGACACAGGGGAGGGTGGTGTCTT  
CTTGGTACCAGATGGGCTTTGTTACTA

>693

GGTGGAGCTGGAGGCCAAGGTTGATGCACTGATGGATGAGATTAACCTCATGAAGATG  
TTCTTTGATGCGGTAAGAACTTATCTAAATTTTTACATGGGTGGGTTTTTTTTCTCA  
AGTTGTCATATCACAATGAGTG

>694

GGTCAAGGCCAGTATGAGGAGATTGCCAACCGCAGCCGGACAGAAGCCGAGTCCTG  
GTATCAGACCAAGGTGGTGTCTGATGACTGTCTCCTGAGTGAGGGGACACACCCAT  
GTCTAGGATTCTAGGCCATGACGAC

>695

GCATGAGATCACAGAGATGAACCGGATGATCCAGAGGCTGAGAGCCGAGATTGACAAT  
GTCAAGAAACAGGTAGGGTGAGATTGAAAGAGGGCAAGGAAGGGGCCTGAGTTCTA  
AAAGAAACACCTACTTTGTTTTATTT

>696

TGAACACCAAGCTGGCCCTGGACGTGGAGATCGCCACTTACCGCAAGCTGCTGGAGG  
GCGAGGAATGCAGGTGAGTAGACAGCATGAACTCAAGATGGCCTTCAGCTGATAAAG  
CGAAGCTGCTCTACTGTGGGGTGTAC

>697

GGCCCCCTGATACCCCTCTGCCTGAGGAGGTAAAGAGGTCCAGCCTCTCCTCATCCC  
AACCACCGGCAGGTACGATGGGGCGTGGGGCTTGGGGGAGGTCAGTGCTGGATAATA  
CACAGAGGCTTGCAGGCCACTGCTC

>698

ACAGAGCCCAATTCTCGGGGGCCCTCCAGTGCAAGGGGGCTGCTCCCCGCGATGCC  
AGCCGCCCCATGTGAGTTGTCCCTCAGAAGGGAAGGGAGGGATGCACGGGTTCTGG  
GTCTGTGGGAGATACACAGCCGCTT

>699

GTGCAGCGAGCTCACGCCTTGAGCGACGAGACCTGGGGGCTGGTGGAGTGCCACCCC  
CACCTAGCACTGGGTAAGTCAGGTGCATGGA ACTATCCGGGCTGGGAGATGATGCCTT  
GCATCTTGGGCTAGGCATGTGGCTC

>700

CGTGGGCGGAGATAGCCGCTTCGTCTTCCGGAAAACTTCGCCAAGTACGAACTGTTC  
AAGAGCTCCCCAGTGAGTGCATGAGGGCTGTCTGGGCGCTGGGATGCCTGATCCTCA  
ACCTGGATGCTGGAGCCCTGATCC

>701

GTTCCAGAAAAAATGGTCTCCAGCTGTCTCGATGCACACACTGGTATATCCCATGAAG  
ACCTCATCCAGGTGGGGGACCCCCATTTCACTGCAGATTCACGACTCCCCAGCATT

GGCCAGTGCTTCTCCACCCTTAA

>702

GCTTTGGAAACGCTTTTTCTGTTTCTTGCGCCGATCTGGCCTCTATTACTCCACCAAGG  
GCACCTTAAGGTAAGGTCTTGAGGGTACCAGCCCCAGCCCCCTCAGTCCCTGGTCCT  
TTTAGAAGTTGCCCTTCTCTGC

>703

CAACGTGTACGTGGTGACGCAGGGCCGCAAGCTCTACGGGATGCCACTGACTTCGGT  
TTCTGTGTCAAGGTGAAGACCTGGCCAGGCTGGCCCCTGGCCTGGGGAAGCAGGAA  
CTGCTCAGGCCCCCTGGATCCTGCCC

>704

GCTTCGGATCTTCTGCAGTGAAGATGAGCAGAGCCGCACCTGCTGGCTGGCTGCCTTC  
CGCCTCTTAAGGTGAGACCTGGGAGTGGCATGGGGGGCTGGCCTGGCCAGAGGGA  
TCCCAGCTCTGCCCTCAGGAAGTC

>705

GCTGTACAAGAATTACCAGCAGGCACAGTCTCGCCATCTGCATCCATCTTGTGGGCT  
CCCCACCCTTGGTGAGTGTGCCAAGGGGATGGGAGGGTGGGTATGCAGGCCCTGTCT  
TACGGGTACCTGGGCCCTGTTCT

>706

TGCTGGGCGTGTCAATTGAGAACCCCCGGGAGGCTCTGAGTGTGGCCCTGGAGGAGGC  
CCAGGCCTGGAGGGTGAGGCCTGCTGTGTGTGTGTGTGTTTGTGCTGGGGACCCACTC  
TCTGGGTGGGATCCCTGAAATAGGA

>707

TCTGGTCCACGGGCGCATTTCCCGTGAGGAGAGCCAGCGGCTTATTGGACAGCAGGG  
CTTGGTAGACGGGTAAGGGGAGGGCCGGGCAACAGACCCAGGGATAAGAGAGACTG  
GGGTCCAGGTGGCAGCCATGGTCCT

>708

GCGGAACCCCCAGGGCTTTGTCCTCTCTTTGTGCCACCTGCAGAAAGTGAAGCATTAT  
CTCATCTGCCGGTGAGCTTCCCTGCGTCCCCGGAGTCTGCAATGAGACACAGGACT  
CCCAGCAACCTGTCCTCCTCACCA

>709

GATGGCAGTGGCCGGCTGCTCCAACCTGGACCTCCAACCTCCTAGTCGGATTGCTCTTCC  
CCTCCGCTGCTGTAAGTAACTCACCTTATCTTAAACCAGCCTATGTAAGCTGACATG  
AAGATACTCCTTAATAATACAG

>710

TTACCCCGATGGGCGGCTAGCAGAGCCTGAGAAACCTCGGAAACAGCTCAGTTCTCA  
AGGCACTGTGAGGGTAAGGACTTTAGCCATCTCTAGTTGGGGACACTTAGCAGCTGTG  
GGCATTCCAGGTACCGTTCCTGGC

>711

GATATGCTTTGTACGATGCCACATACGAAACAAAAGAGTCTAAGAAAGAAGACCTAGT  
ATTTATATTCTGGTGTGTA AAAACAAAAGAAAAAAGTACTTTTAAATGCAAGGATTAT  
TATCATAGTCAGTCTTACCTTG

>712

GAAAGTGCACCTTTAAAAAGCAAGATGATTTATGCTAGCTCTAAAGATGCCATTA AAAA  
GAAATTTACAGGTACAACTTGAATATTTGGGGCAGAGAAATTATTCTTTATTAATTATA  
ATAAAGTAATAGGATAATGTT

>713

CACAAGAAGCAGCTGGACTCTCTGCGGGAGAGGCTGCAGCGGAGGCGGAAGCAGGA  
CTCGGGGCACTGGGTGAGGCACTGGGCTGTTGGGGCCGAGGCTCAACCGGGGAGGA  
CGGGCGGGATCCCTAGAGAAAAAGCTC

>714

ACACCACCTCTCTGATCTGGCCTTAACATTGCCCACTGATGCTGTGTCCATCTGTCTTGC  
CATCTCCACGGTAATGACCTGACAGAGTTAGGATTTACCACTATTTTCAGTTCACGGT  
CAGTGTCTTATTGCCCATACC

>715

CTCAGATGTTGATCTGGAGATAGAGAGCCTTCTGAACCAACAGTCCACTAAGGAACAA  
CAGAGCAAGAAGGTAGGGGTCATGTGAAAATACTCTACAATATGCTCTTAATTATAGC  
TTTGTGGACAGGGATTTACCC

>716

ACTATGGAACCAAGGAGGAGTGCATGAAAGCCAGTGATGCTGATCGACCCTGTCGCAA  
GCTGCACTTCAGGTCTCTTGAAGGGAATGAGGTGGGATGGGTTTGTGAGAAGCAGC  
CATTCTTTTCAGCATATTCCTTCC

>717

AAGCCAGGAGCTTGCTCTTACACAGAGTGTGCGAGGTGATTCCAGTGCAGACCGACTC  
TCCCACCTCAGGTACCTGTCTGCTCAGAAAACCTCGTCTCAACTTACGGACTTATGTTT  
GATAGGGCAGCCATACACGTAA

>718

ATGAGATGCGCAGGCTCAACATACCCGTAACACTACAGGATGATGGCTTTCTTCTCTGG  
GTCACAGGCAGGTAATGCAATTCAGTTATGTAGGTATGGACAGATACAGTACAAGAGT  
GAATACTGAATGGGAGATAAAAT

>719

TCAACTGCAACGCATCATTGACAGGCCGTACAGGTCACTGGTTGAACCATGGGAAG  
GAACACTGCTTGGTGAGCAGCAGTGGGGCCAATTCAATAGGTGGAGCACAAGAAG  
AATCATTTGATTTCTTACTGAGAAA

>720

TTGAAAGACTATCTCCTGGCACTCGCAAGATTGAGTTATTTGGACGACCACACAATGTG  
CAACCCAACTGGTAAGGTGACCAGAGAACAGGCTAGTCCTCAAGGGGCTATTATTTAT  
GATTAAGGACAGAACTTAGTAGA

>721

GGCTGGGCCGAGTGGGTGTCTGGTGCCGGCGTTTGGGCTACGTTGTTGTTGGCGACT  
GTGCTTCAAGCGGTGAGTGTAGATCACCTTCGCAGCTGCCACAGGGAGAGTAGGAGT  
GATTGCAGCTGAGAAAGACGCAACA

>722

CAACCTGCTTCAGCTGGATCCTGATTGCAGAGGATGCTGTCAGGAGGAAGCACAATTT  
GAAACCAAAAAGGTAAGTGTCTTAGTATATTCCTCCATTGGATGGTTTAGTTGAGAC  
AAGGTAAAAATGTAAGTTGCTTA

>723

GCTGCCCCTGAACCCAGAACCAACCAGCTGGATCAGTTCTCACAGGAGCTACAGCGCT  
GAGACTGGGTAAGTCAACGATCCCCAGAGCTGGGACAGAAGGGGCAGCAATGGGGCA  
GCAACTGAGGGAGAAGAGAGCTGAC

>724

GCTGCCCCTGAACCCAGAACCAACCAGCTGGATCAGTTCTCACAGGAGCTACAGCGC  
GGAGACTGGGTAAGTCAACGATCCCCAGAGCTGGGACAGAAGGGGCAGCAATGGGGC



AGCAACTGAGGGAGAAGAGAGCTGAC

>725

ACAGCCCCACCTCCGGCAAGTTCCGCCGCGGGAGCGGCTCGGCCTGCAGCCTTCTCTG  
CTGCTGCGGAAGGTTTCGAGTCCCGGTCTGGCACATTCAGATTGGAGGTTAGGGAATG  
GGGAAAGGGGAGCGAGCCAGAGAA

>726

GAAGCTGGAGTTTAAACAAGGCAGAGAAGCACGTGCACAACTTCATGATGGATATCCAG  
TATACCAAAGAGGTGAGATGGGCATATGGCACCCATGGGACACCCCTCTTCCAAGAAG  
CAGGAGTCCAGGCGCCCCTGCTTC

>727

AACATACTCGCAGGAAGGAGTCTCATGCTGCCCGCAGGCATCAGCGCAAGCTGCTGGC  
CGCCATCAACGCGTGAGGGCCGCTTTGTATGCACACGTGTCCATGTGCACCCATGTCCA  
AGTCACCTCTCTGCACGGCTGTG

>728

GTTCCGCCAGGTGCGGCTGAAACACCGGAAGCTCCGGGAACAAGTGAECTCCATGGT  
GGACATCTCCAAGGTACTAGGATCCCGTGGGAGGAGGTCTTGAAGAAGGGGGAGGTT  
GGGGCCACAGGGAGGGAAATCTGGCC

>729

GACTGAGCTGCTTAGCACTGCCCTGGGGCCGAGGCAGCTTCCAGAACCCAGCCAGCA  
GTCCAAGTAGCTGGTGAGGGGGCTGGGACTTGGGCAGGAAGGCATCCTGGAGGAAGG  
GTTCTGTGGCCAGCACCTATGTGG

>730

CGTGGTAGCCTAGAGTCTGGGGAGCTTCTGTCCACCTGTCTGCAGAGGAGTCGTTT  
CCAGCCCGGCTGGTGAGTGCTGGCCAGGGTGGGGCAGAGCAGGCGGGGCGGGGAAA  
GTCCAGACCTGGCTGTGCTGTCTGGA

>731

CGAGAAGAAGACAACATGTGGCACCGTTTGCCTCAAGTACCTGCTGTTTACCTACAAT  
TGCTGCTTCTGGGTGAGGAGGGGTGCGCTTGCCCCACCCCCACCCCTCCCG  
GGCCACCATCAGACCTGGGCAGAT

>732

TGTCGTCATGGTACTGGGGTCTTGGGCTGCTGCGCCACCTCAAGGAGCGTCGGAAC  
CTGCTGCGCCTGGTCAGGAGGGCGCAGGGCCACGGGGTGGGGTGGTGCAGATGGGC  
CCAAGGAGGTTGTCGCTGCAGGCTT

>733

CATCCTGCTCCTCATCATCTTCTGCTGGAGATCATCGCTGGTATCCTCGCTACGCCTA  
CTACCAGCAGGTGAGGGGCTGGGCAGGCCATTCAGAGACACAGACATGCACAGGCG  
GGGCGGACACACACATGCACA

>734

CATGACCAGGCGCTACCACCAGTCGGGCCATGAGGCTGTGACCAGCGCTGTGGACCA  
GCTGCAGCAGGAGGTGGGTGGGTGGTGTGCTGGGAGGGCGCGTGCATCCCCAGGGCCTC  
CCTGGACCTCTGCAGGAGCCTCTGGC

>735

CAGCTGCTGCAAGACGGTGGTGGCTTTGTGGACAGCGAGACCATGCCTCCAACATC  
TACAAGGTGGAGGTGGGTGTGCAGCGGGATCATGCCTCCAGTGTCTACGAGGTGGTGG  
GGGGCACCCAGTACTGGCTGT

>736

GTTGGAGACCTTCATCCAGGAGCACCTGAGGGTCATTGGGGCTGTGGGGATCGGCATT  
GCCTGTGTGCAGGTGAGGGCACATGGGGGTGGCGGCATCTTGTGGGGACACGGGG  
CAGGGCGGTGGCTGGTGGCCCCATG

>737

GATCCTAAGGACCTTGAGCCCCGAGGAGCTAGAGCAGCTGGACTGCGAACTACAGGA  
GATGGATCCTGAGGTAGGGGCTCCAGCACAGGGAACCAGAGGCAGTCCCAGGCATT  
GGGAAGGGTGTGGGCTCTGGGTGGC

>738

TACTTGAGCAACAGGCACTAGAAGTCAAAGAGCGTGATGACTTGGTGCCCTCACA  
GGCGAGAAGAAGGGTATGGGGACCCTGACATCCATGCCTCGTAGAACCCAAGTGGCT  
GTGCTGTCTCTCACTCGTCCCCACTC

>739

ATCACCTGGAGCCTGAGCTGGAGGAGGCACTGGCACATGCCACAGATGCTGAAATGT  
GTGACATTGCAGGTGGGTAGCTGTGGGAAGTTGAGGGTGAGAGGATCAGGGGCAGGT  
GGATTCTAGCCATGACATGGGACTA

>740

CTGATGAGTAACAAGCAATACTATGATGCCCTCTGCAGTGGAGAAATCTGCAACTG  
AAGGCATTAGCAGTGAGTGTGTTGGGGAGCATGGTCCCCAGGGCTCTGGGCAGGCA  
GTCCTAGTGTCTGGGAGAAGGTAGA

>741

TGAGGAGATACTAAAGAGGGTCCGAAGCAATGACAAGGAGCTGGAGGAGGTGAACTT  
GAATAATATACAGGTATTTGACTTGCATCCTCCAAACCATAACACCGGATAACCACTGA  
CATCCGAGAGTCCCTTAGCCCACC

>742

AATGAAGGCAAATACCTATGTGCGGAGCTTCAGTCTGGTAGCCACGAGGAGTGGTGAC  
CCCATTGCCAATGTAAGGCTAGTTGACATCCCAGCCCTCTCCCCACATCTTACATGCA  
CCTGTTGCATGGCTGTCATAAAG

>743

AGGACTCATGGCTGTGCTGAAGGCAGTTCGGGAAAATGCCACACTCACTGAGCTCCGT  
GTAGACAATCAGGTCAGCATTCCCTTCCCCTGATGTTAGCATTGAGTCTCATTGAGTCT  
CCTCCCTGAGCCAGCCAGTGGGG

>744

GGCTACCACTTTACACAGCAGGGGCCACGAGCTCGGGCAGCCCAGGCCATGACCCGA  
AACAATGAACTACGTGAGTAACTGCAGACATGATGTGTGGAGTGGTCAGGGAAGTGC  
AGAAATTGGTGGATCCTCCTGAAAGC

>745

GACCAGGAGGAGACCAACACCCTGGTGGCCAATACCAGCAACTCCAACGGGCTGAAA  
TTGGACCCCGCAGGTGAGCCGGGAAAGTCGCTGCCGAGGTGGTTGGGTTTGGGGTG  
CCCAGAGCCTCGCCTGGCCTTCGGCG

>746

AAAGCTATATTAGTTCCTACTAGCACCCCGGAAGCTCAACAGCACAAGTGATATTGAAGA  
AAAGGAGAACAGGTAATCCTAAAACAGCCAAAAGATGGTCTCATCTCTTAGGTCT  
ACTGGACATAGTCATCTCCTGGGC

>747

ATGAAGCAAAGGAAATGAAATCCCACAGACAATTGCTCCCTCCACCTATGTATCAAC  
TTACTTGAAAAGGTACCAGGCTCAAAGGGGTGGGAGATGTTTCTTCACTCTAGCCA

TGGGAAATGGGTAATGATTGTATG

>748

GGGTTACAGCTACTCCTGTGCTCTCCACTGGAACAGATTCCTCTGTGGAAGCCAGG  
GAGAAGAGGAGGTATGTTGAGTTACTGATTTCAATTTGTGGGGCTCTGCTTTGAGGTAGA  
CGATAAAGGAATGGGCATAAAG

>749

GGATGAGGAAGCAGAGTCTTTACGGAAAGCACGCTCCAGACAAGCTCGGCAGACACG  
AAGGTCTACTCAAGTGAGTGTGGCTTTTTTAAAATGTCATTTGTGTATCTACCCTTCT  
GTTGGAGGTACAATCAAAACACA

>750

GCCCTCAGCAGTTCAGCAACAGAAGCTGGGGAGGGCCAGCAGCCCTGGGGCAGGA  
GTCTGGATGAAGAGGTGAGCTCATTTTTGCTGGCATGTACTGTGCTAAAAGCAGGGTA  
ATTAGTTTGGGGAGTATCTTCTTAC

>751

TCAGTCCCTGATTCTGAGAGTTCAGAGACTACCACAAACTACAAGTCAAAGGAAA  
TGGACAAAAATGGTATGTAGAAGTTCAAAAGACACAGGCCCTCCACAGTGCACATCC  
CCAGATTCTTAAAGTTCATACTTT

>752

GTCCATCCGAGAGAGGAGGCGGCCCAAGGAACGACGAAGAGGCACAGGCATCAATTT  
CTGGACAAAGGATGTAAGTGGATTGGTCTGTGCTGAGGCATATCATATTACTCTTGGTC  
ACCATTCTTTCAGTTGAGTTAAA

>753

GGCCCGGGAGGCCCGCCTAGCCACCCTGACCAGCCGTGTAGAAGAAGACAGCAACAG  
AGATTATAAAAAAGTAGGGTCTTTATTCAATTTCCGGTTCTTTGGTGACATGTAAACCT  
CTCAGCCTTCTCCACCACACCC

>754

GAAAACAAAATTCAGGAAGCCCAGCTAGAGCTAGCAGATATAAAGTCCAAGCTTGA  
GAAGGTGGCCAGGTAAGACGGAAGAAGAAAAAAGATGAGAACCAAGGGTTGA  
TGTAAGGAAGCAAAGTACTAGGGAT

>755

GCAGGGCCAGGCGCCCTTGGCCTTAGGACCCAACTTCTCTTACCGCCATGGAGTTCG  
ACCTGGGAGCAGGTGAGCTCCTGGGGAGTGAGGACTGGAGGTGCAGGGGGCCGGAC  
TCAAGCCCAGAAGCTGCCTGCACCAA

>756

GGGAGATCCCAAGCTCAGTCCCCACAAAGTTCAGGGCCGGTCGGAGGCAGGGGCAGG  
TCCGGGTCCAAAGGTAAGTCGCCTCATACCGGCTGCGGAGGGGCGGGAAGGCTGGG  
GTTGCCCTGACCCAGGGTCTGCTG

>757

GCGCGGCCACAGCATGACCGCTCGCGGCCTGGCCCTTGGCCTCCTCCTGCTGCTACTG  
TGTCCAGCGCAGGTGAGCGGTCGCCGGCCACCGGGACGCCCTGTGGGGACGTGGCGG  
GGCCGAGAGCCGGGAAGGCGACGG

>758

CAAGAGGTACAATTGCGAATATTCTGGCCACCAAAACCATTGCCAAAGGATGGATATG  
ACTTAGTGACAGGTAAGTTCATTATCTTAGGCACTGGGAACACAAAATGCTGATCACAA  
GATCCTCTGTAATTATTCCTTAA

>759

TCTGTTGTGATGTTTCGGCAGCTTCAGACACTAAAAGACAACCTGCAGCTGCCTCTACA  
GTTTCTGTCCAGGTAGGTTCTGCTGGGGAAACAGAACAACCTGGGCTGTAGATACTTGT  
GAACTGGTAATGCTCAGCTTTCCA

>760

CCTGTTACAAACCAGACGAAAACAAATGTGAAAGAGTTACAATACTACGTCGGACAG  
AGTTTTGCCAATGGTAAGTAACTTTTAATTATTCCTCTTTTACAGCTGGCATCAGGACA  
GCAGAGCAAATTGTTCTTTTAG

>761

AACTGGATTGAATACATGTTCAATAAGGACAATGGACAGGCACCTTTTACCATCACTCC  
TGTGTTTTTCAGGTAGGTATAAAGATTCCAAGTTTGGTGTGTTATGATATTGTTTTAAAG  
CCAAGGAACTGGCTGGGCACA

>762

TCATGTGGATCACCTACATGGCGTTTTTGCTTGTGTTTTTGGAGCATTTTTTGCAGTGT  
GGTGCTACAGGTAAGCAGTTTTGTTGTATCCAGGGCAAAAAGAGCAAATGCCCCA  
CTGGCACTTTGAGCTTTCATTT

>763

CGGTATTTTGTCTCCGAGTACACTCCCATCGATAGCAATATAGCTTTTTCTGTTAATGCA  
AGTGACAAAGGTAGGCATATTTGTCCATGAATAAAAGGGTTCAGATGATGCTGTCTGTC  
ATGAGAGCATTGTTTTCTCA

>764

TTACCAGCCATACCCTTCGGGAGCTGATGTACCCTTTGGACCTCCGCTTGACATACAGA  
TACTGCACCAGGTAACCTGCTGTTTGAAGAAATAAGTCACTCTAGATGACCTTGTGGTT  
TGCTGGCTTTTACATGTTGACT

>765

TGGACCACAAGAAAGGGGACGACTTCTTTGTGTATGCCGATTACCACACGCACTTTCT  
GTACTGCGTACGGTAAGTGGCAAGAGACAATCATTGGTAGACACCATTCTTGGGTCTG  
ACTTAGGGTACATGGGCAAAAGCT

>766

CTCCATGACCCTTGTCTGGGTACGTTTGGTGGACCAGTGTCCCGTGGCTTGTGTTGGG  
AGGCTATGATGGTAAGTAAGAGAAGCTTTGACTTTTCTTTTAGATAAAGTCATCTCGG  
TTTTGTCATTAGCATCAAGTGG

>767

TTACCTTCCCTGTCAATAATTACTATAATGATACAGAGAAGCTCCAGAGGGCCCAGGCC  
TGGGAAAAGAGTGAGTCACTCATGGGTGTGAGCAGACTGTCTTGCATTGTGGGAA  
GCTAGACACTTGCAGCAAGCACTT

>768

TAGCTATGCCATCATGTTTCTATATATTTCCCTAGCCTTGGGGCACATCAAAGCTGTGC  
CAGGCTTCTGGTAAGCCGGGGGGGGTGGTGTATGTTCTAGAGGTTAACAGCAGTGCA  
CAGTGTAACGTCATATTTTTGC

>769

TGAAGTCATCCCGTTCCTGGTGTGGCTGTTGGAGTGGACAACATCTTCATTCTGGTGC  
AGGCCTACCAGGTATACTTCCATATTCTCACAGGGCTCAGCATCTGTTCAAGTTTCAGG  
GACTGTGAATGGCTCCTGGGCT

>770

AGGGTCTAGGAGAAGTGGCTCCCAGTATGTTTCTGTCATCCTTTTCTGAGACTGTAGC  
ATTTTTCTTAGGTAATTATGCTTTCAATCCTACCAGTCTGTAGTCTGCTGAGCCTGGAG

AAAGAAGGAGCTGGCTACCTG

>771

CTTCATTGACTTTCTTCTGCAGATTACCTGTTTCGTGAGTCTCTTGGGGTTAGACATTAA  
ACGTCAAGAGGTAAGTTGGTGCCAGGATTATAGTCTATTTAATTTGAGTCTAGAATCTA  
GAGGAAGCAGCTAGCGGGTAT

>772

CTGTTTGTTCGCTTCTTCAAAAACCTCTATTCTCCACTTCTGCTAAAGGACTGGATGA  
GACCAATTGTGGTATGCGCTTATCTGTGGTTTTTCTTTTCTCTACTGAAACAGATTA  
TCACATGCCTTCTAAGAAGCC

>773

TCTGTCATTCAGCATCGCAGTCCTGAACAAAGTAGATATTGGATTGGATCAGTCTCTTT  
CGATGCCAGATGTAAGATGACTTCCTTTTTTTTTTTTTTAACTTCTTTAGCTGATGATGA  
ATACATTTTTCAAAACATGC

>774

GCGGCGGCATGGGCTGCAACAATGATTCCCTGGTGCAGCAGATATTTAACGCGGCGCA  
GCTGGACAACACTAGTCAGTACCACCTTGTCTTGTACTTCAGAAGCAGCGGAGGAGGCTC  
TCAGCCAGGCAGTCAGCTCAGGCC

>775

AGGGGGGAGACTTCATGAGATTCCTGCCATGTTCTTTCGGATAACCCTAACCCCAAG  
TGTGGCAAAGGGTAAGTGCTGCTGCCATTGCAGATAAGCATCCACTGCAACTTTAATTT  
GCAGTAGAAAACACTAGGAGAGGA

>776

GACTTATAGCCAGTAATGTCACCGAAACCATGGGCATTAACGGCAGTGCCTACCGAGTA  
TTTCCTTACAGGTAAGCCTGCCCTTTTTCAATGGGGTTTACCCAGCAAAGGGCCTACA  
CTGGGTGGGAGTGGGGAGGGTT

>777

CAACATGTTTGGAGTTATGTGGCTCTGGGGCATCAGTCTGAACGCTGTATCCTTGGTCA  
ACCTGGTGATGGTGAGTCCCTACACAGTCTCAGTTTGTCCCTAGCTCCTGTTTCACTTG  
GGGAATTGGCTGTCTTAGATT

>778

GTTACGGTGAGCATGAAAGGCAGCCGCGTGGAGCGCGCGGAAGAGGCACTTGCCCA  
CATGGGCAGTCCGTGAGTACCCTGAGCAGGGCCACGCCGCAGAGTCGACCACAA  
AGTAATCCTGGTCACTGGCTGAAGAG

>779

TATTTGGCCATGGTCTTACTGGGAGCCACTCACGGATTAATTTCTCCCTGTCTTACTC  
AGTTACATAGGTAAGAGTTCTCATCTTAAAAGGGTGGCACAATGGAAGGACATTACTG  
AAAGGGAATTCTATCCTGAGGC

>780

AATTGGCGGGCAACGACCTTTCTTTTATCCACCAAAGGCCTTGTCTGGGTTGAAAGA  
ACTCAAAGTTCTGTAAGTAATGCAATTTAGAGTTTCACAGCTGGCTGTGTATTTCTTT  
CTGCGTAGTCAACATGCTTGGA

>781

CGCTCCAGAATAATCAGTTGAAAACAGTACCCAGTGAAGCCATTCGAGGGCTGAGTGC  
TTTGCAGTCTTTGTAAGTAACTTCTTGGTTTCTTGACTACCAAGAGACTACTCTGGCT  
GTTAAAGATGTAATAACTAGAA

>782

CCCTGGCTCTCAACAAGATCTCAAGCATCCCTGACTTTGCATTTACCAACCTTTCAAGC  
CTGGTAGTTCTGTAAGTATCTATCCCTTTTAATTCCATATATTTGTGTTAATTGGGGTACA  
AAAACAGATTTCTTCTGACA

>783

ATCTTCATAACAATAAAATTAGAGGCCTGAGTCAACACTGTTTTGATGGACTAGATAAC  
CTGGAGACCTTGTAAGTATATTCATATTTTGGGCAACTGCATTGTGATATTGAAAGTATA  
ATTTTATACTTCACTGCAGAA

>784

GATTCATAGTAATTCTATTTCTGTTATCCCTGATGGAGCATTGTGATGGTAATCCACTCTT  
AAGAACTATGTAAGTATTTTGAAGTTTCTTTAATGTATAATTATGTGAAGCTGTGTC  
CGTACAATGCCAAACACCC

>785

ATTTGTATGATAATCCTCTGTCTTTTGTGGGGAACCTCAGCATTTCACAATTTATCTGATCT  
TCATCCCTGTAAGTATGTGAATTTAAAAACAAACCTGGATATTATACAGTTGTTTATG  
TGGAAAACAAGAATTTATT

>786

CTTTACAGCGTAATCAAATCTACCAAATAAAGGAAGGCACCTTTCAAGGCCTGATATCT  
CTAAGGATTCTGTAAGTTTGTCTATGATTATTAAGACAATAAATTTTTCCAAACTATGT  
TAATATGTTGTTATGATTC

>787

ATCTGAGTAGAAACCTGATACATGAAATTCACAGTAGAGCTTTTGCCCACTTGGGCCA  
ATAACTAACCTGTAAGTGGATGATTATGCAGTAATGCATGAAAGTAGTAAGTAGTGCTA  
TAGAAACATCTGTTTTAACAT

>788

ATCAACTGAAACTTGTGGGCAACTTCAAGCTGAAAGAAGCCTTAGCAGCAAAGACT  
TTGTTAACCTCAGGTGGTTTTGCTTTTTCTTTTTGTTGAAGTTATGGTAGGCTCCAAAA  
TTACAGAGTGTCTGGTTTTTTG

>789

GCAAATGTCACAAGCACTCTTGAAAATGAAGAACATAGTCAAATAATTATCCATTGTAC  
ACCTTCAACAGGTATGCCTGGCCTATTTTTTACAGTTACCCATGTTAAACAAACATTAG  
GCAAATATATCTAAATGCCT

>790

CCCTAAACCCAGTGCAAACAGTGAACGTCACCCCACTCAAAGAGAAAAGAATGCC  
CTTCTTTAAGAAGGTAACATTAACCTCCAAGCTCCCATTGTCCACCTGCTCAACTGCAC  
TGCGTCACATTTCTAGTCTGTTG

>791

TCCTCCGTATGATGTGGTACCTTCCATGCGACCAGTGGTCCTAGTGGGCCCTTCTCTGA  
AGGGCTACGAGGTGGGTAGCAGCCTTCCACAGGAAGCTTAACTTGCATGCTGAACTTC  
TTTGTGATGCTGCCTCCTACTCC

>792

AAACGCTCGGTATTAACAATCCCAGTAAGCACGCAATAATAGAAAGATCCAACACAA  
GGTCAAGCTTAGGTAAGTCTGTGCAATGAGCTTAAGCTTTTTAACTCTCTCTCCCGA  
TGTTGATGATGAGAAGACCTAAC

>793

TCATCCAGCTCAACTCAGTAAAACCTCCTTGGCCCTATTATAGTATATGTAAAGATTC  
TTCTCCTAAGGTAAGTAGGACTGCTACTGTTTGTCTATAATCAAACCTTCTAAAATGT

ATTTTATGTTCTGCTTTCTA

>794

AGGGAAATCTCAAGCTAAACACCTCAACGTCCAGATGGTAGCAGCTGATAAACTGGCT  
CAGTGTCTCCAGTAAGTTATCTCTATATACAGCATAATCCAGTTACAGAGATCAGACCT  
TTTTTTTTTTTTTTTTTTTTTTTT

>795

CCCTCTCCTTAGCCGTACATTAGCCACTTCAAGTCTGCCTCTTAGCCCCACCCTAGCCTC  
TAATTCACAGGTAAGGGGAGTTTTTATATATATCTATATATACAATCTTCATAGAAAAAAG  
GTTGCCTATGGTGACACCT

>796

GGGCCCCTTCTCCTCCTCCTCCTGCTGCTGCTGCTGCTGCCACGGGGGTCCAGCCCC  
AGCCTGGCGGGGTGAGCACTGACCTTGTGCGAGTGCACAGAGGTTCCAGTGGCT  
ACTTGGGAGGAGGCCAGAGGGAGG

>797

GGACCCCAAAGTGGGGGGCTCCCGCCCCCGCCAGGGCAGTTCCTCGAGCAGTAGC  
CCCCAGGCCAAGGTGGGTGAGGTGGGCTGGGAGGAGGTGTCGTGCTTCACCTTAG  
GGCTGGGTGGGAGGAGCATGGCTGCG

>798

GGTCCCCTTCCGCTACGGGGGCCGATGCTGCATGCCCTGCACTTCGGAGGGCAGTGC  
ACACAGGAAGTGGTGGGTCCGGGCAGCCGGGGCACCCGAGCTGGGGTCACCTGCCCC  
ACGCTGCCTGCTTTTCTGGGAGCCG

>799

ACTCACAACACTACGACCGGGACAGGGCCTGGGGCTACTGTGTGGAGGCCACCCCGCCT  
CCAGGGGGCCAGGTGGGTGCTGGGTTGGGTAGCCTGGGGCGAGCAGGGGGCACTGG  
GCCAGGCCAGAAGGGCCAAGGGGAGG

>800

AATACCCAGGACCCCCAGTCTATCACTGCAGCTGCCCCGGGCCTTACCAGGCAAGG  
ACTGCGGCACAGGTGAGCTGGGCCCGGAGGTCCGAGGGTCCAGGGGCCGGAGCAA  
GTCCCGGAGGATGGGAGAACAGGTGG

>801

CGCCAGGGCCACGTGGAACAGTGCAGTGTCTCGGGGGCCGGACCTGGTGCGAAGGC  
ACCCGACATACAGGTGCGCCACGGGGTGTGAGCCGTGCCACTGACCCCTGACGGGTG  
TCCCTGTCCACACCCGAGTGGGAGGA

>802

CTGATCGTGCCACCGGGACCACCGTGTGTGCCTGCCACCAGGCTTCGCTGGACGGC  
TCTGCAACATCGGTGAGTGGGTGAGCCCCCGGGGTGCCCTGGGGCAGTGCCGGGTG  
GACCCACCGTGGGCCGGCCTCACTG

>803

ACCAGGAGCTGCACGTGGACTCCGTGGGCGCCGCGGCCCTGCTGGGCCTGGGCCCCC  
ATGCCTACTGCCGTCAGCACCAACCCGCTCCAGGCCCGCCGACGCGGGGCAGGCA  
GGATTTTCTGTTGAGAGGCCCCCC

>804

GAGAGGCCCTGGTGCTACGTGGTGAAGGACAGCGCGCTCTCCTGGGAGTACTGCCGC  
CTGGAGGCCTGCGGTGCGCGGTGGCGGGGGGTGCTGCCTGGGCCCCACCGAGGTC  
ACAGCAGTTTTCCCCGTGATCCTCCT

>805

ACAGCTTCTGCGCCGGGAGCCTGGTCCACACCTGCTGGGTGGTGTGCGGCCGCCCCTG  
CTTCTCCACAGGTGCACCTCCTCTGGGCCCCAGTCACCTGCCCTGAGGCCCCACACA  
CCATCCAGCGTCACTATGCGCCTG

>806

ACCTTCGGCATCGAGAAGTACATCCCGTACACCCTGTACTCGGTGTTCAACCCAGCG  
ACCACGACCTCGGTGAGCTCCGGCGTGTCTGGCTGCACTCTGGGCAGGTGGGCCCT  
GTGCTCCCAGGCCAGGCCAGACA

>807

CCCGAGCCCGGCAGCACCTTCCCGCAGGACACAAGTGCCAGATTGCGGGCTGGGGC  
CACTTGGATGAGAGTGAGTTGGGAGGGGGCGCCAGCGTCCGCCAGGTGGACAGGT  
GGCCAGCCACAGTGTGGTGTACGCT

>808

CTACGGCGCCGACATCAGCCCCAACATGCTCTGTGCCGGCTACTTCGACTGCAAGTCC  
GACGCCTGCCAGGTGAGCTGGTGCCCGCCCCACCAGGACCCGACTGGTGGGGGCTCA  
GCTGGTCTGAGTCTCCGAGATGCT

>809

ACCTCAGCCATGAGACTTCTCATCCTGGCCCTCCTTGGCATCTGCTCTCTCACTGCATA  
CATTGTGGAAGGTAAGTGGAGAAGCTGTCTGTGAGATAAAGAATAGGGAGGCAAGGC  
AGGTGGGCACACATTTTGGGTTTG

>810

CTACCCAGCGACTGCCAGTTAGCAGAATCAAGACCTACCCATCACGGAAGGCTCCTT  
GAGAGCAGTAATGTGAGTCTGCCTCCTCAGAAGTTGGGCTGGGTGGGTACCTAGAGGT  
ATAGAAATACACTCTATAGAAATG

>811

ACCTCAGCCATGAGACTTCTCATCCTGGCCCTCCTTGGCATCTGCTCTCTCACTGCATA  
CATTGTGGAAGGTAAGTGGAGAAGCTGTCTGTGAGATAAAGAACAGGGAGGCAAGGC  
AGGTGGGCACACATTTTGGGTTTG

>812

CTACCCAGCGACTGCCGTTAGCAGAATCAAGACCTACCCATCACGGAAGGCTCCTT  
GAGAGCAGTAATGTGAGTCTGCCTCCTCAGAAGTTGTGCTGGGTGGGTATCTAGAAGT  
ATAGAAATACACTCTGTAGAAATG

>813

CCCCAAGCCAAGCCCTCCAACCCAGTAACCCTCGAGTCTTCTTTGACGTGGACATCG  
GAGGGGAGCGAGGTGAGCGGAGTCTGACGCTCGCGGAAAAGCCCCGAGGAGGCGGG  
GGTCCCAGGATTGGGGGATTCCAA

>814

ACAGGAGAAAAAGGCATTGGACACACGACTGGGAAACCTCTCCATTTCAAAGGATGC  
CCTTTTCATCGAAGTATGTGAAATTTCTTAATCTTGTATTCTTCATACAGACAAGTCC  
TGTTCTTTAGGATTGGGGAAG

>815

AAATCAGAATGGGACAGGTGGAGAAAGTATTTATGGTGAAAAATTTGAAGATGAAAAT  
TTCCATTACAAGGTAAAGTAGAGAAAATGCATGTTATTGCTGATAAAAAGATTGTTATAT  
ATCTGGAATACTTGTGGATTA

>816

AGTAATTAAGGAATAGGAGTGGCAAGGATATTGGAAAATGTGGAAGTGAAGGTGA  
AAAACCTGCTAAAGTAAGTAAAAGTTACAGTGAAATACACTTATTATCTTAGTTGCTA



TCTTTTTGAGACGGAGTCTCGATC

>817

ACATTGGAAATACTTTTTCAAATCCCAGAACTGGGAGATGGCTATTAATAAATATGCA  
GAAGTTTAAAGGTAATATTATTTCTAACAAATTATTTTAAAGAAATTATAAATTGAATTAT  
AAACTAAAATTAAGAATTGC

>818

TGACTGAATATTGGTGCTTGTAAGTGAAGATGTCAAATTGGCAGGGAGCAATTGACA  
GTTGTTTAGAGGTAAGTCTGTTTGATTTGAACCTTTTGAATAAGTTGGATTAAGACTTA  
GTTTGAATAGTAGCAACTTTT

>819

ATCAAATACCAAAGCATTGTACCGCAGAGCTCAAGGATGGCAAGGATTAAGAATAT  
GATCAAGCATTGGTAAATTTGTTCCAAATGTTAATTTTTTAAATAGACAACCTACCTT  
TATAAATCATACACCTAACTTA

>820

CAATCAAACCTTCCTTGGGGATACAAACACACCTTGAACCAGATTGATGAAGTAAAG  
GTGTGGCCTCAGGTAAGTGGACCTGCTGTCTATGAGCTGAAATAATGTGTACATGGAGC  
TCAATCAGGTGCCTCAAAAATC

>821

GGAAACCACCTGCCATGTGCTGGACCCACCCCTGTGGCAAGATGCAGCGTGAGGCA  
GCTGAAGGAGCATGTGAGTACCCTTCTTAGGATGACTGTAGGTGGCCCTTCGGCCAGC  
TCCACCGATTCACCCAGCGTCTCAG

>822

TGTGATTTCCAGCTGTTGAAACTAGATGGCAAGTTTTCCGTGGTATACGCAAATGTGA  
TTCCAGTCCAGGTACAGATGACTATTCTTATTCTCATTTTTTCTTGTAGAGAAAGTGGG  
GAAGGGATCTGAATAATTTTC

>823

GGCCGCCTTCAACGCTCAGAACAACGGCTCCAATTTTCAGCTGGAGGAAATTTCCCGG  
GCTCAGCTTGTGGTAAAGACTGAGATTCTTTTACAGGTTGGGCAGTTCGGTGGCACT  
TCGGGAATGTACTGTACGTGGTGG

>824

AGTGTGTGGCACTGACTGTGTTGCTAAAGAGGCCACAGAGGCAGCCAAGTGTAACTT  
GCTGGCAGAAAAGGTGAGTGGGCCGGGACCTTGGGGTGTACCCTCGGACAGAGCT  
GTTTGTGGAACAGAACATCCTTGGTT

>825

TAAGGCAACACTCAGTGAGAAGCTTGGTGGGGCAGAGGTTGCAGTGACCTGCACGGT  
GTTCCAAACACAGGTAACAGCTCCGTGAATATTCTTGCCTACACCTTCAGAATACAATG  
ACCCCTTCACATTTATGCAGTGCA

>826

TGTCATCAAAGGATATTCCAGATTCTTGACAGCATTCTCGTCATCTCTGAGGACATCAC  
CATCATCTCAGGTGAGCACCAGGTGGAGTGCCTCTGGGTGACTGGCCGGTTTGGAGCA  
GGGAGGGAGGCTTAGAGTCTCAT

>827

AGCCTTCAACATCCAGACATTTGGGGAGACCAAGATGTCCAATGCCACCCTCGTCAGC  
TACATTGTGCAGGTGAGGCCAGGGCAGCCTCCCCCAAAGCAGAGGAGCTCTGGAG  
TCTAGGGCTGGTGGGCAGGGCCAGC

>828

TCGCCCTGGTCCAGGAGGTCAGAGACAGCCACCTGACTGCCGTGGGGAAGCTGCTGG  
ACAACCTCAATCAGTGGGTGACAGTGGCAGGGTCATAGGAAGGTGACATCTCGTCCAC  
GGCACAGCCTCACTTCACTTGGGCC

>829

CCTACTACTACGTGGTGAGTGAGCCACTGGGACGGAACAGCTATAAGGAGCGCTACCT  
GTTCTGTACAGGTGGGTGGTCTAGAAAGCCAGGAAGCCCCTCCCTCACCTGGGAGG  
GCCCAACAGAGCAGGGAAGTAGTT

>830

TGCGAGCCCTGCGGGAACGACACCTTCAACCGAGAGCCAGCCATTGTCAGGTTCTTCT  
CCCGTTACAGGTGGGTGCTGCCTGGGCCAGGGTGGGGCTCGGCTTGGCGCTTATGG  
CCTCCACCCCTCCTAGGGAACCT

>831

GGACGCAGTAGCCGAGATCGACGCTCTCTATGACGTCTACCTGGATGTCCAAGAGAAA  
TGGGGCTTGGAGGTGAGGCCCTCCAGGGGCAGTGGGCACCAGCGGCCTCCGCATGT  
CCCAGGGCCACAGGCAGCGTTTCCT

>832

CCACCTTCCAGTGGCTGATCCCCGACAGCGCTGACACCACAGCTACACCCACGCACTG  
TGCCTATGACAGGTGAGCAGGGCCTCGCGCTTAGGGCAGACTGAGGGCACCTCCAAG  
GGCAGCCGTGACTCATAGGTCCGGC

>833

AGGCGCCGTTGTTCCCGACTCGGCTCTTCCCTTTAACTTCCAGGCTGCCTATGGCCTGA  
GTGACCAACTGGTATGTCTCCCTTGACAGCCACATGAGGATGGGACACAGGAGC  
TCAGGTAGGCTCAGCCCAGACCC

>834

CACGAAGAAGAGAAAACCTGGGGAAGAACCAGACGTTGACACAAGCTTCTTGCCTGA  
TCGAGACCGTGAGGTAAAGGCTGCCTGGCCCTGACCCCGCCTCGACTCCAGCCCTG  
GTGGAGACCCTTGCTTAGGGAGCCAG

>835

AGGGCAACACCATGCAGCAGTTCCTGCAGAAGGCGCTCGAGATCCTTCGAAAGACT  
TCAGTGAGCTGAGGTGTGAGGTGTGCGTGTGTGCACGGTGGTGTGTGGCACCTGTG  
GCTCCAGCCCGGGTGCCAGACACCC

>836

ACCACTTTCAACTTTGATGTTTATGACGATGTGCGTTGCTCAGTGACCCACTGTGG  
AGAAGGATGAGGTACAGCGTAGGGGGCCGTGTGAGGGGGAACGGGTGTCCCTGGGCT  
ATGGAGGAGAAGCCAAGGGAAGGG

>837

GAACAAGCACATCTTTCCCGCCAGCCGCTGGGAACCCTACGACCCTGAAAAGAAGTG  
GGACAAGTACACGGTGAAGGAGGGGCTGGCAGGGACCCCTCAAGTTGGGGACGGCA  
GCCAGCCCCTGCTCACCCCTCGCCTTC

>838

GCATTTTGACACCCTCTTAAGGGTGAGCTGAAGCAGCTGCTTACAAAGGAGCTTGCA  
AACACCATCAAGGTAGGTGATGCCCTTCACTGCAAACCTGCCATGACCCTGCACT  
GAGGGGAGTGGAAGGCCTGGCAG

>839

CTGGTCATGGCGCCCCGAACCGTCTCCTGCTGCTCTCGGCGGCCCTGGCCCTGACCG  
AGACCTGGGCCGGTGAGTGCGGGTCGGGAGGGAAATGGCCTTGCCGGGAGGAGCG

AGGGGACCGCAGGCGGGGGCGCAGGA

>840

AAGACCAACACACAGACTGACCGAGAGAGCCTGCGGAACCTGCGCGGCTACTACAAC  
CAGAGCGAGGCCGGTGAGTGACCCCGCCCCGGGGCGCAGGTCACGACTCCCCATCCC  
CCACGGACGGCCCCGGTTCGCCCCGAG

>841

CTGGAGGGCACGTGCGTGGAGTGGCTCCGCAGATACCTGGAGAACGGGAAGGACACG  
CTGGAGCGCGGGTACCAGGGCAGTGGGGAGCCTTCCCCATCTCTATAGGTGCC  
GGGGATGGCCTCCCACGAGAAGAGG

>842

CTGGCTGTCTAGCAGTTGTGGTCATCGGAGCTGTGGTCGCTGCTGTGATGTGTAGGA  
GGAAGAGCTCAGGTAGGAAGGGGTGAGGGGTGGGGTCTGGGTTTTCTGTCCACT  
GGGGTTTTCAAGCCCCAGGTAGAAG

>843

CGGGTCATGGCGCCCCGAGCCCTCTCTGCTGCTCTCGGGAGGCCTGGCCCTGACCG  
AGACCTGGGCCTGTGAGTGCGGGGTTGGGAGGGAAGCGCCTCTGCGGAGAGGAGC  
GAGGGGCCCGCCCCGGCGAGGGCGCAG

>844

AAGCGCCAGGCACAGGCTGACCGAGTGAGCCTGCGGAACCTGCGCGGCTACTACAAC  
CAGAGCGAGGACGGTGAGTGACCCCGCCCCGGGGCGCAGGTCACGACCCCTCCCCAT  
CCCCACGGACGGCCCCGGTTCGCCCC

>845

CTGGAGGGCACGTGCGTGGAGTGGCTCCGCAGATACCTGGAGAACGGGAAGGAGACG  
CTGCAGCGCGCAGGTACCAGGGCAGTGGGGAGCCTTCCCCATCTCTATAGATCTCC  
CGGGATGGCCTCCCACGAGGAGGGG

>846

GGACAAGAGCAGAGATACACGTGCCATATGCAGCACGAGGGGCTGCAAGAGCCCCTC  
ACCCTGAGCTGGGTAAGGAGGGGAATGGGGGTTCACATCTCTATCAGAGAAAGCA  
GAAGTCCTTCTGGAGCCCTTACGCCG

>847

GCTGTCTGGTTGCCTAGCTGTCTTGGAGCTGTGGTCACCGCTATGATGTGTAGGAG  
GAAGAGCTCAGGTAGGGAAGGGGTGAAGAGCGGGGTCTGGGTTTTCTGTCCACTG  
GGAGTTTTCAAGCCCCAGGTAGAAG

>848

GTGTGGCCCTGATGTGGGCCGCCAGACCGTGGGCGCTTGGGCTTCCAGGTCTGGCTG  
AAGAATGGCGTGGTGAGTGGCACCCCTGGGCTAGGGCGCTGGGGGGCTGGGGTGTGAC  
CCCCTGTGAGTCTGGGCCAATCCC

>849

TTCCTGAAGGCGGCTGAGGACTATGGGGTCATCAAGACTGACATGTTCCAGACTGTTG  
ACCTCTTTGAAGGTAGAGAGGAGAATGCTGGGGGAGGAGGTGGGCAGGAGGACAGG  
GTGCTGGGACAGGGAGAGGGTATGAC

>850

TGGCTTTGGGCAGCTTGGCAGTGACCAAGAATGATGGGCACTACCGTGGAGATCCCAA  
CTGGTTTATGAAGTATGTGGCCCCAGGGAGCTTGAGTCTCCGCATGGGGTGGGAGGT  
GGCTTGTCTAAGGAGCTTGCGGG

>851

ATCGCTGAGGCCTACGACGTGCTCAGCGACCCGCGCAAGCGCGAGATCTTCGACCGCT  
ACGGGGAGGAAGGTGTGTGCTCGCGGCCAGGGGCGCGGCCCGCCTTTTGACAGACA  
GGGAAACTGAGGCACGCTGGCCCCT

>852

CAAGCCCCACAATATCTTTAAGAGAGATGGCTCTGATGTCATTTATCCTGCCAGGATCA  
GCCTCCGGGAGGTAAGGTGCCAGGTGGGGCGGTGTCTGTAGAGGGCGATGGCTGCTT  
TTTGAAGCAGTTTAGTATTTGCTG

>853

ACTCCTCCCTGTGAACTCGGGCTCGAAAATGAGACGCTTTTCTGCTTGATCAGCCCC  
GTCCTTCAAAGGTAAGTGTGCGAAGCTGTTATTTTAATTCAGGAACTATTGAGTTGT  
GGGAGAAATCAGCAAAGGCAAGG

>854

CTCATCCCCAATCTGCTCAAGGATTTTCATCTTCGGGAGCGCCGTTTGCAAGACCACCAC  
CTACTTCATGGGTAAGTTGCTGCTGGTGACTCTTTCTGGAGCTTGCCCCAGACCCCACT  
CAGCCCCAGACCTTCCCAAACC

>855

CCAAAATAACAACCAGACCGGAATATGTGCCGCTTTCTACTGCCAAATGATGTTATG  
CAGCAGTCTGGTAAGGTTGCATTGTTATTTTTAAAAATACAGCTTGATGTAATTTTGC  
AATATCATGAAAAACTGAGAT

>856

TATGGATTAATCTCTTTGGAAGTCTACCAGGGAATAAAATTTGAGGCTAGCCAGAAGAA  
GTCTGCTAAAGGTAAGTACTCTGTAGCTGTGTGTTATGCCAAATGAGCACAAAAGCTT  
GTTTTCTATCATTTAAATAGAT

>857

GCGCAGGGTCGCGATGCTGCCGGTTTGGCACTGCTCCTGCTGGCCGCTGGACGGCT  
CGGGCGCTGGAGGTGGGTGCCGCGCCTCGGAAGGCGGGGGGAGGCTGCACGGTGGG  
GACGCGATACCCCCAAGACCTTAAC

>858

GGATTCAGATCCATCAGGGACCAAACCTGCATTGATACCAAGGAAGGCATCCTGCAG  
TATTGCCAAGAAGTAAGTCTGTCCGGTGGCTAGCAATTCACGTTGGATCACATGCATT  
TGTTTTCAAAAAATTTAACTTCT

>859

AACTGGTGCAAGCGGGCCGCAAGCAGTGCAAGACCCATCCCCACTTTGTGATTCCCT  
ACCGTGCTTAGGTGAGCCGGCCGCGCTGGGGCTGGTGTGATTGGGGCCTGGTCT  
TGAGGGAAGAAAAAGAGGATGCTC

>860

CAAATCTTACACCAGGAGAGGATGGATGTTTGCGAACTCATCTTCACTGGCACACC  
GTCGCCAAAGAGGTACCAGCCATAAATCTTTCTTATTGCAAAGTGAAGATTTCTGG  
GGACGTGCTTAATGGCATTTTAG

>861

CTGCTGATGCGGAGGAGGATGACTCGGATGTCTGGTGGGGCGGAGCAGACACAGACT  
ATGCAGATGGGAGGTAAGGTGCCCTTTGTGTTTCAGCCTCAGAGATGCTGAAACATCTT  
GTATGGAGTATTTGTATCCTGTAAA

>862

ACAGAGAGAACCACCAGCATTGCCACCACCACCACCACCACAGAGTCTGTGGAA  
GAGGTGGTTCGAGGTAATCCACCATTGCTTGGATTCCCCCACCCECAAGGAAAAGA

AAGCGTAATACCAGAGTTGGAAATA

>863

GGCGGATGTGGCGGCAACCGGAACAACCTTTGACACAGAAGAGTACTGCATGGCCGTG  
TGTGGCAGCGCCAGTAAGTGGACCCCTTCTCGAGCCTGGCCACCTTTCGTCTCTCTCG  
CCACTGACTCTGCTTTTTGTAACAG

>864

GAATGAACATGCCATTTCCAGAAAGCCAAAGAGAGGCTTGAGGCCAAGCACCGAGA  
GAGAATGTCCAGGTAAGTCTGGCTCTCCATCATTAGCCCTACGATATTGGGAAACC  
TGAGCTTGCCTCTGCCTCAGTCTC

>865

GAGAGAATGGGAAGAGGCAGAACGTCAAGCAAAGAACTTGCCTAAAGCTGATAAGA  
AGGCAGTTATCCAGGTAACCTGAACCCATTTCTACCAAACATCACATGCCAGCAG  
TCTTTTTAATGAGTGTCTGCAGGTTT

>866

CATGCTCAATGACCGCCGCGCCTGGCCCTGGAGAACTACATCACCGCTCTGCAGGCT  
GTTCTCTCTCGGGTAGGTCTCGCTGCAGCCGAGTTCACACTTCAGGTCACAGCACAGA  
CAGTAAGGGTGGGGCACTGGGAAC

>867

GCACACCCTAAAGCATTTGAGCATGTGCGCATGGTGGATCCCAAGAAAGCCGCTCAG  
ATCCGGTCCCAGGTAAGCGTGGGGTATAATCATCTTCTGCAGCTTTGACAATCCAGGAT  
TCTTGCTTCTGGGTTGGTGACA

>868

CGCATGAATCAGTCTCTCCCTGCTCTACAACGTGCCTGCAGTGGCCGAGGAGATTC  
AGGATGAAGTTGGTAAGTAAGCTGTTCTTTTGATGCTGCACATGGACATGTATTTCCC  
CCAGAGGAAAATTGAGGAAGTGA

>869

AGCCTGGACGATCTCCAGCCGTGGCATTCTTTGGGGCTGACTCTGTGCCAGCCAACA  
CAGAAAACGAAGGTAAGAGTCCCCTGAGCCAGCAAGGGCGTTCTGGGAGGTATATATA  
CACATACATAACGTGTGTGCAAGA

>870

GATCTCTGAAGTGAAGATGGATGCAGAATCCGACATGACTCAGGATATGAAGTTCATC  
ATCAAAAATTGGTACGTAATAAATTTACCTCTTCCACTACTGTTGTCTTGCCAAATG  
ACCTATTAACCTGGTTCATC

>871

AGTGATCGTCATCACCTTGGTGATGCTGAAGAAGAAACAGTACACATCCATTCATCATG  
GTGTGGTGGAGGTAGGTAACTTGACTGCATGTTTCCAAGTGGGAATTAAGACTATGA  
GAGAATTAGGCTTAGCTTTTTGC

>872

TTGACATCTGACGACGTGAAGGAGCAGATTTACAACTGGCCAAGAAGGGCCTTACTC  
CTTCACAGATCGGTGAGTGTGTTGTGCTAACATAGCCTATTTGCCTGTCCTCGTGTGA  
CTTGTAGGATCTAGTAGGTGGTA

>873

TCCTGAAGATCTCTACCATTTAATTAAGAAAGCAGTTGCTGTTTCGAAAGCATCTTGAGA  
GGAACAGAAAGGTAAGCTAATAAATAAACCTGGTGCTAAGTAGGACTGCTTGTACTA  
AATTTTTTCGGTAAAATGTAATG

>874

TAGAGAGCCGGATTACCGTTTGGCTCGATATTATAAGACCAAGCGAGTCCTCCCTCCC  
AATTGGAAATAGTAAGTATCAACTCTTTTGTCTGTTGTTATCAAGAATAGGAGTCAGCCA  
GTAGTAAAAGTCCTAGTAGTAA

>875

CGCACCTTAGTGCTGCTGGACAACCTCAACGTGCGGGGAGACTCATTGCTTTTCTTCC  
GGAGCCTGAAGGGTGAGAGCGGGGTCCGAGGGGGTAGCGTGTGGGGGCCTGGGGTT  
GGTACAGACATCGAGGGCATTGACCA

>876

AGCCTGTCTCTCATAAAGTATGGGGAATTCCTCTATGACAATCTCATCATTTTCTCCCT  
TCGGTAGAAGGTAAAGGGTCCGCGTCGCCCTAGCACTGGAATTCGAGACCCGGGACT  
TGATGGATTGCTTTCTTCTGGT

>877

AACGTGGAGACCATCAGTGCCTTTATTGACGGTGGAGGCAGTGTGCTGGTAGCTGCCA  
GCTCCGACATTGGTGAGTCCGACCTGGGAGGTTCTGGTGCTTCCACTTCTCCAGGGA  
GTTGGAGAGCATTACAAACAGAAG

>878

GATTGAGTTTGACGAGGAGAAAACGGCTGTCATTGACCATCACAACCTATGACATCTCA  
GACCTTGGCCAGGTAATCAGGCCTGTCACCTTCCAGGTTTCAGGGGCATATGGCAAAG  
CTCTGCTTAGCCAAAAGCCAAGAG

>879

AGAACCTGCTGAAGGCCCAACCATCGTTGGGAAATCATCTCTAAATCCCATCCTCTTT  
CGAGGTGTTGGGTGAGTGAGTGAGCAGGGAGAGGACAGCAGAAACCTGGGGGAAGA  
AGGGGTCACTTAATTTTTGTGGGAA

>880

TTTGGTGCTGGACATCCTGACGGGCTTCCACCTCTTACTCCTTCTCCCGACAAGC  
CTATACCCAGGTAAGGGCTTACAACCTTGAGGCTTCGAAATAAAAATGAAGCAGAA  
CAGCACATTTGGCTGAGGCGAAG

>881

GCTCCCTCGACTTCTCAGCGACTCCTTCTCAACTCAGCAGTGCAGAAGGCGGCGCC  
CGGCTCCAGAGGTAGCTGCCAGGAGGCTTAGGGGCCGGGATCCGGGTGGTGCAGT  
GTGTGTATATGGGGAGGACTCAGAA

>882

GGGGCCTGTGCCATCATCGGGTGGGCGAGACAGCCCCACCAATGCCTACACTGTC  
ACTGACCTAGTGGTAAGAGATGTTTGGGGTGGGAGGGCCAAAGGGTTTGCCAAGCT  
GACTGAGCTCAGCTCAGAAGCACTT

>883

GATGGCGATGACATTCAGCTGGAGTTTGTCCGCATTGATCCTTTTGTGAGGACCTTCCT  
GAAGAAGAAAGGTGAGTGTAGTTCCTGCACGAGGATGCTGCCAGAAAACGGCCCCAG  
GCCTCACTTGCTCTCGAGGCCCAA

>884

GTATGGTGTATTCCAGTTTAAAGTGGATTACAACCGGCTAGGCTACACACACCTGTACT  
CTTCCACTCAGGTAAGCACAGGTGACAGCTTCTGTTTTAGCTAGCATGTGCCCTGCCT  
GGGTTCTGCAGTGGGCAGGTCC

>885

TGTCTTTCAACTGGCAAGAGTCATTTTGACCAGCAGGTTAATCAACTCTAAGACAGATC  
CTCACGCAAAGGTATGTACCTGGAAATATTAAGTGAAGAAATTTTTCTCAGACTTTTC

ATGAGCTTTTATAGGACATTC

>886

CCACCATCCACGCCAGCCGCACCATGCCGCTCCTAAGCCTGCACAGCCGCGGCGGCAG  
CAGCAGTGAGAGGTAAGTGCCCCGCCCGTCCGAAGCTTCCAGAAGCGCCGCCGC  
GCAGGCCTGCGGGGGCCGTCTCC

>887

CCTGAAGATCCCAGGTGGGCGAGGGAATAGTCAGAGGGATCACAATCTTTCAGCTAAC  
TTATTCTACTCCGTGAGTATGGGGCCGGCCTGCTGGGGCTGCTCTGGGGCCACAGGT  
ACTTCTTGTGCACCTTGCTGCCCCG

>888

CAGTGCTGAGTGCGGCAGCCTCTACATCGAGATCCCGGGCGGCGCTGCCCGAGG  
GGAGCAAGGACAGGTGAGGGGCAAGGACAGGCAGGGAGTGCTCACCCAGGGGAGCA  
GGGACCAGGTGAGGGGCAAGGACAGGC

>889

GAGTTCGCTGAGGAGCAGCTGCGAGCCGACCATGTCTTCATTGCTTCCACAAGAACC  
GCGAGGACAGAGGTAGGTGACCCGTATCGCCTGCAGTAGGGTGCGTGGGGGTGCCTG  
CGCCGCCCTTCATTCTCAGCCCCG

>890

CCCTCTGAACACGACCCTCAGCAGCAGCAGCTTTGAGATTTACCAGTGCTGCCGTGA  
GGCCTTCCAGAGGTGAGGGCCTGGGCTGTGGGACCTGCAGGGCACCCACAGTGATAG  
ACAGAATGCTTGAGCGCTGGGGGGG

>891

GTGGGTGATCATTTTAGCAGTTCTAGCAGGATTGTTGCTACTGGCTGTTTTGGTATTTGT  
AATGTACAGGGTAAGTAACGGACTTAGAAAGAAGGAGAGAGGGAAAGCAGAAGAAA  
AGGGAAAGGGAAGAAGGAAAAGAA

>892

TGATAGAAAAACAAATCAGTCATGGCAACTTCAGCACCCAGGCCCGGGCCAAGACAG  
AGAACCCGGGCAGGTGAGTGAGCGTGTGTAGATAGAATGGGGCCAGGGAGGAGGGG  
AGAAGGAGGGACAGAGCTCTGTAGAAC

>893

CTGGGGAATTGTCACTTATGGCAGCATTGGCAGCAGGACATCTTGTCAAAAGTCACAT  
GATTCACAACAGGTAAGACTCAAAGATATATTTAACATGTTCCCCCTATACTTCAAAA  
ATATGCAGTGTA AAAACTTACTA

>894

ATCACCTTTGGTGCCTTCCTCATCGGGGCCCTGCTCACTGCTGCACTCTGGTACATCTA  
CTCGCACACCGGTGAGTACCCAGGCCCCACAGTGAGCATGCCGGGCCCTCCATCC  
ACCCGGGGGAGCCAGTGAAGCC

>895

GAGCAGGAGCACCAGTCCAAGCCCCTTGAGGCCTGTCTGGAGGCTGAAGAGGCCGG  
CTTGCTCTGCAGGTAAGGACTGGAATATAGAAATTCAGTAAGAGGAGGCAGTAAAGA  
GGAGGGATGTGTAATCCCCGGATGA

>896

GGGAAGTGGCTCCGGCCTCCAGGCTCCGGGGCCGGCGCTGACCCCATCCCTGCTTCT  
ACGCATACATTGGTGAAGTGCCTGCGGAGGGGTGGGGTGTGTGGGCGCCAGACCAATG  
GGATTGGCATGTGGCGGGTACTGA

>897

TCCTAGCATTCACTTCTGGAGCACCCCTGAGTCCCATTGCGCCCCGTAGCCCGGCCAAG  
CTCTCCTTCCAGGTAGGATCCTCTTTCCCCGTTTTGGACAGGGTGAGAGACCCAAGAA  
TGGCCCCCATCTGTGACCTCTCCC

>898

CCTGGGCCCTGCGTGTGATCTCACCCCTTTCGACTTCAAACAAGGCATCTTGTGCTATC  
CAGCCCCAAGGTACTTCAACAACATGAGATACCTAGGTAGGGGTGGATGTGCCACCCA  
ACACCCAACCACTGACCCATATT

>899

GGAAGGAGGCCCCGAGGGATGAGACCAAGGCTGACACTGACACAGCCCCAGCTTCAT  
TCCCTGCTCCTGGGTGAGTGTGGTCTAAGGTGAGCCAGATGGGTGAGGGTTGTGATT  
GGGGGTGCTCTTGGAGCCCCACACC

>900

TGTGGAATCAGCTTCTCAGGGGATGGCACCCAAAGGCAGCGGCTCAAAACGTTGTGC  
AAAGACTGTCGAGGTGAGTGGCCTCCAGAGGATGGGGCATCGGGAGATAGGAGCTGG  
AGCAGGTCCAGTGTGATGCTACGCTG

>901

GCCCCATGATGTGGCATCGGGGCTGTTCTGCAAGTGTGAACGGAGACGCTGCCTCCGG  
ATTGTGAAAGGGTGAAGTGGGCAAGTGGAAAGAGCCCAAGGCTCACCTCGGCCCT  
GGCCCCATGGGCTTGGCCCCATGC

>902

CATCTGCCTTCGCCCTCCCCGCCCTGGTCTCAGGCGCCAGTGGAATGTGTCCAGCGA  
CGTTGCCACGGGTGAGTTGGGCTGGAGGGAGCAGAGCTCATTCTGCTGTTAAAATCG  
TCGCTGCCTCTGCTTCCTTTCAAC

>903

CAGGCGGCGCCCCGGAGCCCAGCCACTGCCTCCACCACCCCATCACAGTCCCCAGA  
GCCACAGAGCCGGTGAGGCCCCAGTGGGTGGAGGGAAGGCACAACCCTGACCTTAC  
CCAGTACCTGCCCTGACCCACCCCA

>904

GCCCAAATTCGGGGGCAGCAACCAGAAGCGCCAGAAGTGTGTTGGCGCCAATGCCT  
GCAGTTTGCCATGGTGGGTGGGGCAGGAAGGGTCAGGTGGACGGGATAGGTTGGGCC  
AGGCGCCCCAGTGCCTGGAAGTGGTG

>905

ACGGGAAGGCGCAAGCAGTCTGTGCAGGTGCCGGGCCCTGTTGCAGCTTCCACAGA  
AGCCCTGTTGCAGGTGAGGGCCCCACCCTGCTCTGCCTTCCCAGCTCACCCAGCTGC  
ATGCCAGGGAGCTGAGACCAAGTCT

>906

CCAGGACGAGTGGACACCAGGCACAGCTGTCCTGACTTCTCCCGTATTGGTGCCTGGC  
TGCCCTAGCAAGGTGGGGCAGTGATGGATGTTCTGTTGGTGCCGTAGCGGAGTGGTC  
TGTAAGCAGAGTGATGATGAGCCA

>907

GGAGAACAAGGATGATTCTGCCTCAAATTGGCCCCAGAGGAAGAGGCAGGAGGGGC  
TGGCACACCCGTGGTCAAGTGTGGGATGCCACCCTGCCCTGACCTGCTGTAGCC  
CCAACAACCACATTGACCTATGGTG

>908

CCGCGGAGAGAACCCGGGCACCCCTGCTCTCTCCATAGGCTTCTCCGTGGCCCTGGGC  
CACCTCCTGGGGTAGGTCATGGCCATGGGTTCCAGCCTCCCTGGAGAAACAGACACA



CAGACCACTCCAGAGACAGACACA

>909

CGGCTGCTCTATGAATCCTGCCCGCTCCCTGGCTCCAGCTGTCGTCACTGGCAAATTTG  
ATGACCACTGGGTAATGGCTGAAACCCCTGCCCTCCCCTTCTCTAGAAACCCATTTTA  
GAGGGAGAACAAGAGCTGGAAT

>910

AAATCATTCCATTCCGAGTGGCTGCCTACAACAAAGCCAAAAAGCCATGGACTTCTA  
TGATCCAGCAAGGTAGGTTTTTCAGAGGAAAATTCTTTTATCAACATCTGTATAAAAGAA  
ATGATGAGGCAGAATTTGGGCC

>911

ACCTGCAAAAGTCAGGGCAAGACGTGTCCAGGCCAACGCCAGATCAAGCGGGGG  
GCGCCGCCCGCAGGTAAGCGGGGGTCCCCGGGGCTGGGCGGGGTCGAGCGGGGGC  
GCACCACGGGTTCGCTCTGTCTAGGCCA

>912

AGCGTCCGTTTTCTGCAGCAGCGACGCCAGGCGGGCCGGGACCGCAGAGCCCC  
GGGAGCCCCTCGGTGAGTGCAGCGGAGAGGGCAGGAAGGGCAAGCCGTAGAGGCG  
GAGTCAGCGGGAGAGGCGGGGCCAGAG

>913

ACCATCCACGAACACAGATAGAAAGAAGGAAAAACAAGCCTGTATTTTTCCAGCAAAT  
ATAACAAAGAAGGTATCCCTTTCCAATCAGAACAGCAAATTCTAATTCATTTGGGT  
TTTCAATTCTGATGCACTATGTT

>914

GTTCAAGAAACACTTTTTCATGATCCATGGAAGCTTCTCATCGCTACTATATTTCTCAAT  
CGGACCTCAGGTTTGGGATTATTATCATCTTTGTCTTAGTAGAGACAGTGTGGTAGGG  
AGAAAGCACTGAATTGAGGCC

>915

GATGTGTCAGAACTTCTTAAACCTCTTGGTCTCTACGATCTTCGGGCAAAAACCATTGT  
CAAGTCTCAGGTATTTTCTATATACCCAAAGGAAAAACATAATACATTGTGCTTATTT  
AAGAGAGCCACACCTTAAACT

>916

TGAGCTTCATGGGATTGGTAAATATGGCAACGACTCTTACCGAATTTTTTGTGTCAATG  
AGTGGAAAGCAGGTGAGGCTCACTCCCATCCATAATTCAGCACATTTGGTCTCTGAGGC  
AAAATAAGTCCACCATTATGGTT

>917

AGTTGGGGAAGCTCCAGATGGACCAGCCAGTGCCTACTTGGCCGACACCACCATACC  
TCCTTGACATGGTGAGGCCCAAGGATGGGTGTAGACCAGCGCAGGGGGTAGAAAC  
GATTTTTAGAAACGAAAGCTTTTTA

>918

TGTCTCCTCCAGGCCTGGAGGCCTTGGTGTCTGAACTCTGTGCTGTCCTGAAGCCTCG  
CCTCCAGCCAGGGTGAGTGAGGTCATCACCCAGGGTGTGAGAAAAGCCTGCTTAGA  
ACATCCCTGGAGGAGCAGCAGCCAG

>919

CCCCCAGGCTGTGGGAAGACCACAGTAGTTGCTGCTGCCTGTAGTCACCTTGGGCTC  
CACTTACTGAAGGTGAGGGTCTCTGGAGAGTAGAGCCCCAGCTACTTCCCCTCCCAG  
CTCATGTTCTCCCTCTCTGCTGCT

>920

GGCTGGGTGAGGATGCCCCTGTGATGGCTGTGCTGCGTCACCTCCTCAATGAGGA  
CCCCCTCAACAGGTAATTATACAGAGCTGGGCCTCTCAAAGCTGGGGGGCCGGCTGG  
GCGCGGTGGCTCACACTTATAATC

>921

GCGGGCCCTCACTGCCACCTTCCCCTGGGCCAGGAGGTGAACTTGGCACAGCTAGC  
ACGGCGGTGTGCAGTGAGTATCAAGGGAGAGTACTGGCCCTCCTAGGAGGTCCCTGG  
CTTTTGTTACAAGAACTCAGTCCTG

>922

TGGTAGGGGATCTCTATGCCCTTCTGACCCACAGCAGCCGGGCAGCCTGCACCAGGAT  
CAAGAACTCAGGGTAAGAGGACGTGGGCACCGGAAAGGCGGAAAGAGGAAATGGAT  
GTAGATGGGTGGGTGGTGAGGAAGGG

>923

GGCTGAGGACTTTGGGCAGGCACTGGAGCAACTGCAGACAGCTCACTCCCAGGCCGT  
TGGAGCCCCAAGGTGGAGACCAAGTCCTTGGAGGTGGGACAGGAGCCCCTCCAAGA  
GCATATCCCAACCACGCACTTTCCAT

>924

GGCCCCCTGGCACC GGCAAGACCCTTCTGGCCAAGGCAGTAGCCACTGAGTGCAGCC  
TTACCTTCTCAGGTGGCCAGGGGGCCTGGAAGGGATGGTGGGTGGATCAGGGGCTG  
CAGCAGGCTGGGGAGCAGGAGGGGCT

>925

TCTTTGATGAACTGGACTCTTTGGCCCCAAGCCGGGGGCGAAGTGGAGATTCTGGAGG  
AGTGATGGACAGGTAGGGGTCTGAGTGGGAATGAAAGCTGAGGGGTCCAGGGTGGGA  
AGGATATGAGAAAGCTCACAGCAGT

>926

AGGATGTGTTTGTGATTGGAGCCACCAACAGACCAGATCTCCTGGACCCTGCCCTTCT  
GCGGCCTGGCAGGTGGGCCCTTGTACTGCTCATCTCCACCCTCATTTTGTGCCTCCTT  
CACCCCTCATGGCTGGGCTCCCT

>927

AGCTGGTGTGTTGTTGGGGGCAAATGAGGACCGGGCCTCCCAGCTACGCTTCTAAGTGC  
CATCACACGCAAGTATGCTCTGTTAGAGGAAGACTGCGAAGGGCTTGGGCCTTGGGAT  
GCTTAGGGGATGCATGCAACATGC

>928

GACCTCTACTCTCTGCTCTGATGCTATGACAGCTGCCCTCAAACGCAGGGTTCATGA  
CCTGGAGGAAGGTGAGCACTTGCCGGTCTGAGAGGTCAACCAAAAAGCTAGTGGGG  
AGCTGGGTGCACCTGAGTCCCAGC

>929

TGGGCCGCGACTAAGAAACATCTAGTGGTGCCGGGGGATAACAATCACTACGGACAC  
AGGATTCATGCGGTACGTGGGGACTTGGGGGAGTCGAGGCTTCAGAGAGCGGGCTCA  
GGGCTCTCTGCACGTGGTCCAGGCC

>930

TCATTGCATCTGTTGCTGGCTCTGTGGAGAGAGTAAACAAGTTGATCTGTGTGAAAGC  
TTTGAAAACAGGTGAGAACAAAAGGTGTGTATTCCCTTCTTGAGCATCAGGTTGT  
ACAACCAGGCTTTTCTGCCCCCT

>931

CTTCATCTGGATTTACCCAACACCTGAGCACAAAGAAGAGGAAGCAGGGGGCTTCATT  
GCAAACCTGGAGGTGAGCAAACACTGTGGCCATTTTCAGTGGGATGGAGGGGGCTCA

GTCTTTGCTGTGTTTTGTGGCCAG

>932

GGTAACTCAGAGGATGATGCTGTATGATACCAGCATCCTGTACTGCTATGAAGCATCCC  
TTCCACATCAGGACTCTCCCCAGGGCCTCTCCCTTCTTCACTGATCTGTGAGCTGCTC  
TGTTGTTTGTTTCAGAGACAATA

>933

ATCTGCCTGAAGCTGGTGGGCTGCAAATCCAAGAAGGGGCTGCCTCGTCCTCCAGCT  
GTTATCTGGAAGGTAAGCCCGGGCCGCACGGTTGGGCTGAGTAGCCGCGGCCCTCC  
CGCTGCTGCTGGGCCCTTCTAGG

>934

GACCCCAACCTTTTCGTTGCACTGTATGATTTTGTGGCCAGTGGAGATAAACTCTAAG  
CATAACTAAAGGTAAGCCCGGGTGTGGGCAGCTAGTGGTGGTTGCAGGAGATAGAAATC  
TGGAATTGCGGTTTGACCTACC

>935

GAGGTCCATCTCGCTGAGATACGAAGGGAGGGTGTACCATTACAGGATCAAACTGCT  
TCTGATGGCAAGGTAGGGGACCCTTGGCAGGGGGCGCTGATGGGCCAGGGCAGGGG  
AACCAGAGGTCCTGCTGTCGGATTG

>936

CCAGTACGGGGAGGTGTACGAGGGCGTGTGGAAGAAATACAGCCTGACGGTGGCCGT  
GAAGACCTGAAGGTAGGCTGGGACTGCCGGGGGTGCCAGGGTACGTGGGGCAAGG  
CGTCTGCTGGCATTAGGCGATGCATC

>937

GTGGAAGAGTTCTTGAAAGAAGCTGCAGTCATGAAAGAGATCAAACACCCTAACCTG  
GTGCAGCTCCTTGGTGAAGTAAAGCCCGGGGCTCTGAAGAGAGGGTCTCGCGCCGACC  
CCCAGGGTGACACAGGCGCTGGGGAA

>938

TGCTGCTGTACATGGCCACTCAGATCTCGTCAGCCATGGAGTACCTGGAGAAGAAAA  
CTTCATCCACAGGTAGGGGCTGGCCAGGCAGCCTGCGCCATGGAGTCACAGGGCGT  
GGAGCCGGGCAGCCTTTTACAAAAA

>939

TTCCCCATCAAATGGACTGCACCCGAGAGCCTGGCCTACAACAAGTTCTCCATCAAGT  
CCGACGTCTGGGGTAAAGGCTGCTGCTGCACTGAAGTGGTCTTCTGACTACAGGAG  
GGTTTTTTTCTGCCTCTTTCTTGC

>940

CTAGAGAAGGACTACCGCATGGAGCGCCAGAAAGGCTGCCAGAGAAGGTCTATGAA  
CTCATGCGAGCATGTAAGCCTTCTCAGCCTGTTCTCACGAGTATATGTGGGCATTCCA  
GGAAATTCAACTGTGCAGGAGTGT

>941

GACCGGCCCTCCTTTGCTGAAATCCACCAAGCCTTTGAAACAATGTTCCAGGAATCCA  
GTATCTCAGACGGTAAAGTACCCATCCCGGGGTACCTGCAGTGGGGTGAAAGGGCAGC  
CATGTGGGACTGCAGCCTGGGTCA

>942

AGAGCTGCAGAGCACAGAGACCACTGACGTGCCTGAGATGCCTCACTCCAAGGGC  
CAGGGAGAGAGCGGTAAGTCCCCGCTTCCCCAACCCCACTGCTCTTCCCTTCCCTG  
CCAGAGGCTACATTAGGCCATCAT

>943

CAAAGCTAAAATTGAACTACTTGGGAGCTATGATCCACAAAAACAATTATTATTGAAG  
ATCCCTATTATGTAAGTACAGTTCACGTTTTAGGGCTAATATGAAGACCCAACACATTTG  
TATCCTGCCATATTAATAAC

>944

ACTATAAGCTCCAGGTTGACTTCTCCTCAGACCACCTGGGCTGTTTCACCAAGTGCCG  
GAAGCCATGCAGGTTAGTGTCCCCTTCCCCGGGTACAGGTTGGGTAGAATACAGGTTA  
CCGAGCCAAGCATTGGGAGAGCT

>945

AGTGGCCAAAGTCAACATCTTCTTCAAGGAGCTGAACTACAAAACCAATTCTGAGTCT  
CCCTCTGTACGGTAGGTCGTGCCTGGATGGAGCCTGTGATGCTCTGGGGGTCTTACTT  
AGCAGGGCGGCTGTCCGGGAAAA

>946

GCGCCATCTACAACAACATGAAGCAGTTCATCCGCTACCTCATTTCTCCAACGTGGGC  
GAGGTGGTCTGGTGAGCAGCTGGGTGGGCGTCCAGGAGGAAGCCGGGGTTAGGGTGG  
GGTGGCTGCAGGTCTGGGAGGCAG

>947

CGCCCCCGGAGCCCCAAGGAGCCCCTCATCAGTGGCTGGCTCTTCTTCCGCTACA  
TGGAATCGGGGGTGAAGTGGAGGGGTTCTCGATCTCCCAACCCTGGGACTAAC  
CCCCTCTTGGGACACCAGCTCCC

>948

CACCGTGGGAGCAGCTGCCTGGTGGTTCCTGTACGCTGAGGATGGGCCTCATGTCAAC  
TACAGCCAGCTGGTAGGGGGAGGCCACAAAGGAGGGGACCAGGAGGGGGGGGGGAT  
GCAGGAGGGTACCAGGAGGGTGGCAT

>949

AGGCCCCGAGCCCATGACCATGGCCCTGTCCGTGCTGGTGACCATCGAGATGTGCAA  
TGCACTGAACAGGTGGGGGCCCCCCAGCTACACCCACCACCCTCCCCTGAGGCCACT  
GCCACATCCTCCACTGTGCCGCC

>950

CTGGTGCTGGGCTCCATCTGCCTCTCCATGTCCCTGCACTTCTCATCCTCTATGTTGA  
CCCCCTGCCGGTGAGGTTTCTTCCGCCAGGGCCGCCACCCAGCACTGGGGAGCCC  
ACGGGCGCCCATGACCACTCCC

>951

CTCAAGATCTCACTGCCAGTCATTGGGCTCGACGAAATCCTCAAGTTCGTTGCTCGGA  
ACTACCTAGAGGGTAAGGAGTGCCCTCTCTGTCCCAAGCCCTGGCCCCACCACAGCCC  
CTTCCCATGACGTCCGTCCCCCG

>952

ATGTGAACAGGAAGAAAAGTATGAAATTCCTGAAGGTCCACGCAGAAGCAGGCTCAA  
CAGAGAACAGCTGGTATTTTTCTTTAATACTTTTATTGTTCTTATTATGACATACTA  
TTATTATCACCATCAGGAAGAA

>953

TGTGCACCGGCTGGTCAACCTCTTCCAGCAGGGGGGCCGGGAGCTCGACATCTACAAC  
AACCTACGGCAGGTGAGGCTCGGTCTGAGGGAGGAGGGCTGGGGCTGGACTCTGG  
GTCTGACAGAGGAGGGGCTGGGGGC

>954

ACCTGCCTGCGAGCCCTGCTGGACAGCGCAGCTCCGGGCACGTTGGACCTGGAGGCC  
CGCAATTATGACGGTAAGCATTACCGCGGGGCACCGCTGGGCTGTCCAGCGGACCTG

GAGTCCATCAGCGGCCGCAAAGCCC

>955

GGCAGTGAACACCGAGTGCCAAGAAACCGTGCAGCTTTGCTAGAGCGCGGTGCCGA  
CATCGACGCAGTGGTGAGCGTGCCTAGGAGCTGGGAGGGAGCGGGCCTTAGCAGG  
GGCGGGGTCTTGGCGGGGGCGGGGCC

>956

GAGCGGCCGCTCCCCGCTCATCCACGCCGTGGAAAACAACAGCCTTAGCATGGTGCAG  
CTGCTGCTGCAGGTGCGTACAGCCCCCTGAGCCTCGCGCCACCTATCCTCTGACC  
CCAACCCGGCTCTGGCCTCAGCCC

>957

CAGCGGCGCTGACAGCAGCCTCAAGAACTGCCACAACGACACGCCGCTCATGGTGGC  
GCGCAGCCGCAGGGTGAGCCGGGGCAGCTGTGGACATGCCCTTGACACAGTGTGTC  
CGCGGGCTGGTTGCAGGCGAGTGTGC

>958

CAGCCAGACCCCTCCCTGACCGGAGCGCCAACACCTCCCCGAGAGCAGCAGCCGC  
CTCAGCTCCAATGGTGAGAAACCGTTCCCAACCTCCAGCCCTGGCGCCTCCTCCCTCA  
GACCCAGGAATCCCAACCCACAGCC

>959

AGCTGCTGAAGAACCACTGATTGAGCCCCTGATGGAGCCAGAAGGGGAGAGTTATGA  
GGACCCACCCAGGTGAGGGGGCAGCAGGGCTGGGCGGGACTTTGGGAATCCAGGAT  
GATTGCTGCCGTCCCTAGCTGGGGTG

>960

CTTCATGCCGTCTCCCAGGTGGTCAGGTGGAACCCATGCCTGGAGCCTCACCGCTTC  
AATGACACAGAGGTGATTCTGCCTTTTCTCCTCAGTAGGCTGAGGGTACACAGAGGTG  
ATCTAAGTCAGGGACCAGAAGCTG

>961

CAGTATCTCTGCTGCTCTCAGACAGCCAAAATGCTATGGGCTGCCAAATTTTGAGA  
ACAGGAATGGAAGTAAGCAATCTGATCGATATAATTTCTTTCTCCTTTGACTGTTCCAT  
CACTCTCAAGGGTCTGTCAAG

>962

GGAAGGGTGATGAATATTTTATCTTGGAGGAAAGCAACTTACCATGGTGGAGAGCACG  
AGATAAAAATGGGTGAGTCCACACCAGCCCTTCTGAGCCTGGTGCCTGCCACTCCC  
TACACGCAAAAAGTGCTGCGGCAT

>963

GAGGTTTCATTGTCAGAGACTCCAGCAAAGCTGGCAAATATACAGTGTCTGTGTTTGCT  
AAATCCACAGGGTGAGTGCTACTATTCCAAGGCCCTGAGGACAAAGAACAGGGGTAC  
CCTCCTAATAGCTCCTTGATGCTG

>964

TACCTGGCTGAGAAGCACCTTTTCAGCACCATCCCTGAGCTCATTAACCTACCATCAGCA  
CAACTCTGCAGGTGAGTACCAGGGGCAACTGAGAAGGGAGTTACAGACACCAGGATA  
AGCAATGCAGGACAAGGTGATAAG

>965

ATATCCAGGCTCAAATATCCAGTGTCTCAACAAAACAAGAATGCACCTTCCACTGCAG  
GCCTGGGATACGGTAACTCCTTATTTCTCTGGGGTAGGGTGGACTGGCCAGTTGCAA  
AACTACCTTTGCTGGCCTTGCTTA

>966

TGCCATCAAGATGATCAAAGAAGGCTCCATGTCTGAAGATGAATTCATTGAAGAAGC  
CAAAGTCATGATGTGAGTTATAGCCCAAACCTCAACTCTCAATCTATTTGCTGGAGTCTA  
GGAATTCACACAACAACCCACTG

>967

AGAGATGTGCAAGGATGTCTGTGAAGCCATGGAATACCTGGAGTCAAAGCAGTTCCTT  
CACCGAGACCTGGTGGGACCTTAGAAGGATTGGCCTAGGACAAAGGGCTGATGGGGT  
GGAAGTAGCAGTGGAAGATATATCA

>968

GTCCGGTGGTCCCCACCGGAAGTCTGATGTATAGCAAGTTCAGCAGCAAATCTGACA  
TTTGGGCTTTTGGTAAGTGGATAAGATTACACAGATTATACAGCTCAAAGGATAAGAAA  
TGCAATGGGGAAAATTCACACTT

>969

CCTACGTCTCTACAGGCCTCATCTGGCTTCAGAGAAGGTATATACCATCATGTACAGTTG  
CTGGCATGAGGTAAGTGCTTTATTAGGATCTCTTAAATTATTTCTTGAATCTACTTGCC  
CATTTAGCTGGCCATTCAGC

>970

ATGAGATCTCTTGGGCAGAATCCCACAGAAGCAGAGTTACAGGACATGATTAATGAAG  
TAGATGCTGATGGTAAGTCTTCAATTTTGTGGGGCTGGGAGGGGTTGAAGAAGTGATA  
CTTAGATGTTTCCACTAAACCTTT

>971

GATGGCAAGAAAATGAAAGACACAGACAGTGAAGAAGAAATTAGAGAAGCATTCCG  
TGTGTTTGATAAGGTACGTCAAGGACTGGATATGTTAAATTTTGGAGGATGAAATGAAGA  
TACCAGGACTCATTATGAAGACTT

>972

ACAGATGAAGAAGTTGATGAAATGATCAGGGAAGCAGATATTGATGGTGATGGTCAAG  
TAAACTATGAAGGTAAATGTTTCGGTCTCACGCCTCATTCTTCACTTTGATTTTTAAGAT  
AAGAGGCTCTTTGTTAGGGAAC

>973

ATGAGGTCACTGGGTCAGAACCCAACAGAAGCTGAATTGCAGGATATGATCAATGAAG  
TGGATGCTGATGGTAAGAGCTTTAAAACCATGAATGAGGGCCATTGTTGTGTAATTCAA  
GTTACAGACATGTTACAGGATTGT

>974

GATGGCTAGAAAAATGAAAGATACAGATAGTGAAGAAGAAATCCGTGAGGCATTCCGA  
GTCTTTGACAAGGTAATCCAGCATCTACATAGCAGATGGTACTTAAGTATGGCTCTTCC  
GCTTTCACTTCTAAAAGCTATA

>975

ACAGATGAAGAAGTAGATGAAATGATCAGAGAAGCAGATATTGATGGAGACGGACAA  
GTCAACTATGAAGGTAAAATAAATTCTCTGAGCTCAGTGTTCATAGTCTTACCTTTA  
GATCTGTAAGCAAGCCAACCTGCTT

>976

TCAAAGAACAGGACATAAAAAACAAAGTCACAATGACATTCCATAGTAAATTTGGAATC  
AGAACTCCAAATGTGAGTATAATTTCTTCTAGGTTTAAATGCTCTGTAGGTTGGCACTGT  
TACACTGCATGTATGCAAAGAA

>977

GACACGGACGCCTCCGCAGCTGCAAGTCCCCACCAAGAGGTCCAAGAAAGCTGGC  
CGCCATTAACAGGTGGGGGCCTAGGTAAACAGGTCCCCTATGTCCCTCTGGGTGATTC

CAGCAAGTGAGCTGGTATCTTCCA

>978

GCCCCCGTCTCTGGGCCTGCAGGGCGTCCCGGGTGTTCCTGGCATCACGGGGAAG  
CCGGGAGTTCGGTACGTGCGTTTTCCGGCTTTCCAGCTTTCACAGGGTTGAGATCGT  
GTTTTTCCGGAAGGAAGTTACT

>979

CACCCTGGCGCTCGAGGACCCCCGGATACCGCGGTCCCACTGGGGAGCTGGGAGAC  
CCCGGGCCAGAGGTGAGTGTGGACCCATGACACGGTCACCCTGCTGTAAAAATCC  
CTGAGACTGACTTGTAGTAGGCGC

>980

GGTGACAGAGGAGACAAAGGCGCGCAGGAGCAGGGCTGGACGGGCCTGAAGGAG  
ACCAGGGGCCCAAGGTACGAGTCCACGGCCAGCAAGGCTTCACTGGGTGACATCTC  
TTCCGCCATCTGTAGCTTTATGTGGGG

>981

AGGACCGTGTACCACGCAGAAGAGGTGCAGTGTGATGGCAGGAGCTCCACCGCTGC  
TGCTTTCTCTGCAGTAAGTAGCTCTCCATGCTCCACCTTTGACGGAATTTGTATGTACAG  
AGCTTCAATATGTCTATTTAAGG

>982

ACGGTTATGGCCAGGGCGCTGGCACGCTTAACATGGACCGTGGCGAGAGGCTGGGCAT  
CAAACCAGAGAGGTGAGTTGGGAGACCGTTGGTTACCTTCAGAAATGAGTTGCGACA  
GTTAGTGCCGCTTGCTGAACAGGAA

>983

AGGTGCTGAGAAGTGTCCAGATGTGGGGATTCTGTATATGCTGCCGAGAAGATAATTG  
GAGCTGGAAAGGTAAAGTGCTATTTGGAATTAATAACAGCAAATGACTTCTCTGCTC  
CCTTTCTCCCCTAACCTTCCA

>984

TGTGCAAAGTGTGGGAAGAGTCTTGAATCAACAACCTCTGACTGAAAAAGAAGGTGAA  
ATCTATTGTAAGGTAAAATTCATTTAGTTACTGCTGTCCATATGAATATCCACACTGG  
TTCTTGTTAATGAAATGCTACT

>985

AGTATCTCAGCGCCCTGGAGCCACAGTACCACTGACTTTGCCACCTCCCTTCATCAG  
CCTTCTCAGGGTGAGGGGGAGCATGGGGTGGAGGAGGTGGGACACGTGTGGAGAG  
CTCAGGCGGCCCCCTCTCCTCCAG

>986

TGCAGAGCAGATGGTTATGGTGATCAAAGCCCCTCTGAGACCCAGCTCCAAGCCGTG  
GACTCTTCGGAGGTGAGATCTGGGAACTCCGGGCCCAACCTGGGCTGGGCTGGGCTG  
GGCTGGTGGTCACCTGGGCCTCAGT

>987

CCACCACCATCATCTCCCCCTCATCCCTCACCACAGATCCCAGCCAGTCTCTACTCAG  
CCTGGAGCAAGGTGGGTGATGGGTAGGTGGGTGGGGTGGGGCAGGGCCCCCTTCTG  
GGGGTGGGCAGGCACGACAGCCC

>988

AGGTGGACGTGGGTTTGGCTGCCGATGTAGGAACACTGGAGCGCCTGCCAAGGTCAT  
CGGGAACCAGAGGTGGCGTGCAGGGGGTGTGGGGGTGTAAACAGAGACCCAGAGC  
ATCTCCAGCCCCGGGTGGCAGCCT

>989

TGGTCAACGAGCTGGCCTTACCGCCCACAAGATGATGGCTGACGAGGCCCTGGACA  
GTGGGCTGGTCAGGTAGGGCCATGGGCTGGTAGCTCAGTGCTGGGGGCAGCCAGGCC  
TGGAGGGAAGGAGGCCTCTCCGGGTC

>990

GGTGCAGAGCACCAAGGTCAACCTGCTGTATTCCCGCGACCATTGGGTGGCCGAGAGC  
CTCAACTACGTGGTAAGGTGCACGCTCCGACCAATCACAGCCCTCCTCTAACCCCAGG  
CGACCAACCAGGGTGCAGGGTGCT

>991

ACCGGGTGCGCATCAATGTACCTCCACACAGAGGGCTTCTCTGGGCCCTCTCCAGGTG  
ACGGGGCCATGGGTAAGGCAGCCCCCTTCCCCTGCCAAGCCCTCCATGTTGGGGGAG  
GGAGCGCTGCCATGGGGGAGGGTC

>992

CCCAACAAATGCCATTTCATTGCCTGGACGGGCCGGGGAATGGAGTTCAAGCTCATT  
GAGCCTGAGGAGGTGGGCCTCTCGGATGTCCCAGCCCTCCTTCCAAAGTTTACAGC  
CTGGAGGTGGGAGAACCTGGGAAA

>993

GCCAGCCATGAATTACGACAAGCTGAGCCGCTCGCTCCGATACTATTATGAGAAAGGCA  
TCATGCAGAAGGTGGGGGCTGTGGGTCTAGGGACAAGGTGGTGGGGGGCAGTGGCTG  
TGAGAAGCTGACTGGGGAGAGGGT

>994

ATAGCCAACGAGAGTGGCCCTCCCACTTGTGTGGCACCTCCACGCCATTGTGGGAC  
TCATGGCCAATGGTAAGTGTTAACTTCTAGAGTCTCTCCCTCACCCCCACCTGTGCTTT  
GCATATAGACCAGTGAGAAGCTG

>995

AGCATGAGATCACCATGCCAACCAGATGGTCCGCATCTACAAGGATGGCAAGGTGTT  
GTACACAATTAGGTATGTCAAGCCTCTGGAGTCTCACTTCTGGAATTCTCTCCCCCTT  
CTGATAATTTAGCTAAAGATC

>996

GCCGGATGCTCACTCCACATGCTCAGATTTCCAATGGATTCTCACTCTTGCCCTCTATCT  
TTCTCTAGCTGTGAGTACCTTCTTAAGTTTCTGGGGCCCCAGAAACATGCTGGGCTCCT  
TCTTTTTCTCATCCTTGCCAT

>997

TCCTGGAAGCTCTTCCAGTTTGATTTTACAGGAGTGAGCAACAAAAGCTGAAATAATCA  
CAACCCAGTTGGTAAGCGTGCCAGGGCTTGGCGGAAGTCCAGGAAGGTGGTAGGGA  
TGATTGGAGATGGCCATCCATACAA

>998

GTGACCAGATGCTCTCCTGGGTTTCTTTTGGATCAAGACAGAGTCTGCTCCAGCCC  
GGACCTCTTAGGTAAGAGGAGAAACAGGTATACGCATAGGCACATGGCTGGGAGTTG  
GCTGGGCCAGGGCAGAGTTGCCTT

>999

GGAGTTTGCTGTGCTCAACTTCTGATCTACAACCAGACAAAAGCCCATGCTTCTCCTA  
AACTCCGCCATGTATGAGCTGGGTATGGGAGTGGTGGCAAGGCTTTGGAGTGTAGAGA  
CATGCTAGCAAGGGTACTGGGGT

>1000

CAAGACCAGCTGCTCACACCCGAGGAGGTCGTGGACAGGATCTTCTCCTGGTGGATG  
AGAATGGAGATGGTAAGAGGGGCAGAGATGGGGAGAGTGCTGTCCACTCTGCATCATC



GCCACTTTCTGGCCGCACGTCCTT

>1001

GATGGCATTTCATGCACCTAATGCTGTGAAAACCGCATTATTTAGCAGAGTTTTTT  
GTTAATGAAGGTAATATGAGGGTACATAATTTTGTATTCTGGGGTAGTTTTGAAGAAAA  
TTGCCCTTATCTGAACTTTT

>1002

ATCATGTCTTTTCCCTCTACTTCATGATACCCTTTTTTTTACCACCTTTGGGATTGCTCTA  
CCACAAGTGGTAAGTAGGCCTGTGGATAAGGGGACAACCTACCTGAACACATGGCAAA  
GATGGCCCTTATCATAACCCAC

>1003

TGTTCAACTTCCTCTACTCACTGCCTCAGCTCCTGCATATCATCCCCTGCCCTGCCACC  
GCATACCCAGGTAGCCGCTTTTTGGCTTGAAATGGACATCATAGCCTTTTCACTTGGGA  
TATCTAATGCCAGCCTATAACA

>1004

CAAAGTGGAGATGAGCTATTCCAAGTTCAAGACCAAGAGCCTCTTTTCTGGGCACC  
TTTATTTTAAAGGTAACAGGGTAACAAGGAGGTAAGGCCCTAGGCTGCCATCCTGACC  
TTGAGGAATGGGGAACCTAGTCCT

>1005

CAACTTGCTACTTAAAGTCCTTGGGCCCATACATGAGAGAAACCTCACATTGCTCCTGC  
TGCTGCTGCAGGTGAGGATGGGAATCGAGTTTATACCTCCGTGTCTCCCTTTCTGCGTG  
ATTCTTACTCCAGTCCATTCT

>1006

TCCTACTGGGGAGCCCTGCCAGAGCCCCTGCGTACCTATGGGCTTCCTTGCCACTGTC  
CCTTCAAAGAAGTAAGTACTTAGGGAGGAGAGAGCGTTACCCCTGTGGCTAAAGAGAT  
GGGGTTTGGAGAGAAGGGTCTTT

>1007

AATTCACCACCTCGGACTCCTGCGACCGCATCACAGACGAATTTAGCTACTGCAAGC  
TCAGTACCACAGGTGAGCTGGGGGACTGGGGGTCCCTGCGTCCCGAGAATGTGAGTC  
CCCCATTTCTTCTGCGCAAGAGG

>1008

GCAGCAGGTCTTGGGAGCCATTGAGAGGGCCAAGCAGGTCACCGCTCCCGAGCTGAA  
CTCTATCATCCGAGTATGTATGGGGACCTGGGCGGGTGGGCGGGGACAGGTGGGCCC  
CAGGCAGCTAATGTTCCCTCCCC

>1009

CCCCTGCCCAGCTCAGGCTGTTCAAGTACCTCCCCATCATTCTGCACACTCCTCCCA  
ACTGGACGCTGGTAAGGACTTTTGAAGAAAAAGTTTACCTTCAGTATTTGAGCAGGTG  
AGCACTTTGTGCGAGAGGTGATA

>1010

GTTCAACAAGTACCTGTCGCGGCCAAGCGCTTCGAGGTGGCCACCTCGCTCATGCTC  
ACCGAGACCAGGTGCGCGCCCTCCCCGCCCCGACGCATCCCGGCCTCCAGGGGA  
CACTGTTACCTTTGCACTTGTGACC

>1011

GAACTACGTATCCAGGCCGCGGAGATGTGAGCTGGCGGCCGCCCTAAACCTGCCGAA  
ACCACCATCAAGGTATGCGGGTCCAGGCTGGGGAGGCGGGTGTGCACCTATTTAGCG  
GGAAGTAAATGCCAACTGCCAACT

>1012

GAAGTGTACTTTTCGGAAGGAGAACCTCCTGGAGCATGAAGCCCGAATTGCATGAAC  
CGCTCGGAACAGGTACTIONGGAGCTGGCCCAGGTACTIONTGTGGGCAGGGCACACTGGC  
CTCTCTGTCTTCGTGCCATCCGGGA

>1013

GGAGACATTCCGCCGAAGGATGGAGCTGCGGGTGCACATGGTGTCTCACACAGGGGA  
GATGCCCTACAAGGTCAGGCTTGGCCTGTCTCCAGGGCCAGGGTTGGGTGGCCCCAGG  
ATCCTTCCTGCTGAGCCCTTTACGT

>1014

GCAGTTCATGCAGAAGAAGGACTTGCAGAGCCACATGATCAAACCTCATGGAGCCCC  
AAGCCCCATGCAGTAAGTGACAGGGAGGGCTGGGCATGCTTTGATGCTGGCATGAGCA  
AGAGTGAGCTGTGCCCAGAGTGGG

>1015

TGTGTGAGGAGTGTGGGCACCGGGCTCGAGCCGGAATGGCCTGCAGATGCACATCA  
AGGCCAAGCACAGGTGCGTGTGCCCGTTCTCTTTGGGGCCAGTCTGCTGCCAGC  
CCAGGCTTGCACCGGCAGGGAAGAC

>1016

CACCTGCGCACACACACGGGTGAGAAGCCCTCCAGTGCCACCTCTGTGGCAAGACC  
TTCCGAACCCAAGGTGAGGTACGCCCTGCCCTCCCTCGTCTCCCCATCTGAGGTC  
AAGGCCACAGGCTGAGCTTTGCCT

>1017

AGGCACGTGGCCAGCCGCCATCAGGAGGGCCGGCCCCACTTCTGCCAGATATGCGGCA  
AGACCTTCAAAGGTACTTGGGCGGCCCTGGGAGAGCCATTTCTGCTCATCCGAGTTG  
GAGGGTCTCTGAGGAGGAAACGCT

>1018

GCACGTCAGACGGCACAAGGGGGTGAAGAAAGTTTGAAGTGCACCGAGTGTGGCTACAA  
GTTTACCCGACAGGTAGGCCAGGGCCTGGCCCCCTCCCTACCCTAGGATCCCCCAA  
AGTTCTGAGCTCACCTCCCCGCCA

>1019

GTCAGGTTAAGATTCGGGACATGGACTCAGGCACTGTCTCTTTGAAATCAAGAAGC  
CCCCAGTCTCAGGTGAGTGGCTGGGTGGGCCATTGATGGGGAGGCAGATAGGAGCTG  
CGGAGTGGGCTGCCAGGGAATCCT

>1020

CCAATGCTGGGCGCTTTGTCCGCTACCAGTTCACGCCTGCCTTCTCCGCTGAGGCA  
GGTGGGAGCCACGTGAGTCGCTGGGCGATGGGTGGTGGGGGTGAGGGAGAGGG  
TGTGAGTGGGCCCTTCTCAGCCTCTC

>1021

TTCTGCATCCCCAGCAGCAAGAACACCTGCGAGCACATTTACGACTTCCCCCTCTCTC  
CGAGGAGCTGAGTGCAGGGGAGGGTCTTCTGGGAGTGGGGAAAGTGGGGCGTCTAG  
AGACTGAGCTGCGGGAGGGAGAGG

>1022

TGGATCGCGTTGTCCCGCTGGCGCGCCCGCAGCGCCTGCCGGTGGCCACTCGCGCGG  
TGCTCATACCGGTGAGTGCAGGGTGCAGGAGCGGGGACTCCAGGCTCGAGGGC  
GGGACTGGACTCAACAGGACTGA

>1023

ATGGACCTGACCAAACCAGGAGACATTAGCCGCTTTCTAGAGTTCACCAAGGCCACAA  
CCACCAGCACCGGTGAGTGGCAAGTGTCCACCAGGCAAGGGCGTGGCAGGGGAGTG

GGAAGGACACGGGGACTGGAAGTTTG

>1024

GCTGACCAAGGGCCTCCTGCCCTGCTGCGCAGCTCAAGGGGCCGCATCGTACTGTG  
GGGAGCCCAGCGGTGAGTGCCCCCCCCACTGGAGCAAAAAGGAGCCCCCTGGGGTG  
GGGGAGGGCTTAGGGAGCCCCTTGC

>1025

ACATTCAGCTGTGAACTCCTTCCCTGGGGGGTCAAGGTCAGCATCATCCAGCCTGGCT  
GCTTCAAGACAGGTGGGAATCAGGGCTGGGGGTGGGGTGGGGTGGGGAATGGGGCT  
GGGAATGGTCTTATGGGGGCAGGTC

>1026

CCAAGAGTGTGGCCCGCCGGTCTCCAAGCCCTGGAGGGGCTGAAAATGGTGAAAA  
AGGACCAAGATGGGTAAGCAGGGTAGGGGGGCTGCATTGATGGAGTAGCCTTGAGG  
CCCGGTCATCAATCCCCAACGAATG

>1027

GCCTATCGTATGGCCAGTCTCCCCGATCATAAGAAGACTCTGGAACATCTTTGTAAGA  
AACCAAGAAAAGTGAGTGTTTTTGGTGCTTAAAAGTGTGTGTTGGCAACATCCCAG  
TGGCCAAGAATGATATTCCAGGA

>1028

TGCTCCCCGCCGTTCCGTTTCTCGAGGGAAAGGCTGCTGCCCTCTGCTCTGTCCCTCAT  
CCCCGGCTTAGGTAACACGTTTTCTCCTTACGACACCCACCACAGGGTCCCCGCGCC  
GCTGCCCTCCTCCTGGATCTG

>1029

TGCAGTTGACTTCAAGACGCTGGCTGATGTACTGGTACAGGAAGTTATAAACAGAAT  
ATGGAGAACAAGGTAAGAAAGGTCATAGCCAAGGTAAGTCAAAAATAGTTGCATCTGT  
GGCTTCTCCATCATAGAATAGCA

>1030

GACCCAACTCTGGATTCCACAGAGATCAATGTTCCACAGGACATTTTGGGAATTTGGG  
TGGACCCATAGGTAAGTATAGGAAAGTATGTTTGTCTTATTTGCAATCTTTTTTTGG  
TGGTGGGGTTGGGGATGGGTGT

>1031

TACAGACAGGGGTTCCCTGATGGGAGTCATCAATCAACCTTTTGTGTCACGAGATCC  
AAACACCCTCAGGTAAAAGGCAAATATTTTGGTATATTATGGTTGTTAGAACTTACGA  
CCTCAGCTTTGCTTGTGTTAGG

>1032

ATCCATGCTCAGCCATCTGATAAAGAGAGGCTTACTTCTGATGCATAGTATTGATCTACT  
TCTGTAATTGGTAATTGATCAATGTTTTTAATTGCTAGCTGTGGGACCCGCTATGGTTG  
TGGTGGCTAACTTTAAGAAC

>1033

CAGGGCCTGGGGATCTGGCCGAGGAGAGGACTGAGTTCCTGCACAGCCAGAACTCGC  
TGTACCACGCAGGTGCACACTCTTGGCCTTCCCTCCTCCAGGCCTCTGGGAAAGC  
GGCTCCCTTTCTGAGCCACCCCTG

>1034

GGACCTCCTCCTGGCCACCACAGCCAAGCCATCAGTACCCAGTGCTGACAGTGAGAC  
ACCCCTGACCCAGGTGAGCAGAAACCAGGCTCTGGAGCCCAACAGCACAGTGGTGAC  
AGTGGGCATCACTGAATCTGTATCCA

>1035

AACCCGGCGCCGGAGCTCAGGGCCTCCTTCTGCCACGTACCTTGTCTCTGCGGAACT  
CCATCAGCAGGAGTGAGTCTGGACCCAGGAGAGCAGGGGAGGGGTTGGGGGGTGCT  
CCTGGGCTTCCCTAGCTCAGCCTGCT

>1036

GACGAGTGGCAGGCCATCTCGGAGATTGCCTCTACTTGCAACACCATTCTGGAGTCGC  
TGTCCTCGAGAGGGTAGGCCACCAGGGTGCTGCGGTAAGCCTGGGCAGTGCTCTTGCC  
CCCTTTCTGACCTGCCACCTGATC

>1037

TGGGAACCTCTCAGAGAAGGTCTCTCACTTGGAGTCCATGCTCAGGAAGCTGCAGGA  
GGACCTGCAGAAGGTGAGGGGTGGGCTCAGCTTGGGGGGAGTCACAGGGCTGCCCC  
AGGAAAGGGGCTGGCGCTCTGACTCC

>1038

TCAGTGGTCATCATCCCCTTTGCTATCCTCCTCTTCTTTCTCCTTCATCGCTGGTGTGCC  
AACAAAAAGAGTAAGTCTCACGAAGCAGAAGCCAGAGAGCTCAGGGCCATGTGGGG  
AAGCAGGATGGGAGCACTCAGGTG

>1039

TCAGTGGCCATCATCCTCTTTACCATCCTTCCCTTCTTTCTCCTTCATCGCTGGTGTCC  
AAAAAAAAAAGTAAGCCTCACGAAGCAGAGGCCAGAGAACTCAGGGCCTGTGCGG  
AAGCAGGATGGGAGCACGCAGGTA

>1040

GGCAGCAGCGACCCCTTCCAGCAGGGCCTCACGCCGCCCAAATGCCAGGTGACCAC  
ATGAACCCCTATGGTAAGCCGCCCTACCCCCACCCGCCCGCCCCAGCACAGCCCCTGC  
CCCCTGCCAGGCCAGGCAGGCCTGG

>1041

GTCAACCTGACAGGGGGCCTGAGCCACGCCTCTGACGTGGTCCTTTACCATCAGCACA  
AGCAGCCCCAAGGTGGGGCAGAGGGGAGCCTGGGCTGGGGAAGGGAGGCCTGTGG  
GCATTGAGTCTCAAGCTGTGGCCCT

>1042

TGTCCCAATGGGAAGCGGCTGGACAACGGCACATGCGTGCCTGTGCCCTCTCCAACGC  
CCCCCAGATGGTATGCTTATGCCCTCCAGTCCCAGCCATGCCTCAGGACCATCTCC  
TTCCTGTGGCTCCTGACTTCCCC

>1043

GACAAGTGTGAACTGGACCAGTGCTGGGAGCACTGTCGCAATGGGGGCACCTGTGCT  
GCCTCCCCCTCTGGTATGCCCCCTCATCCCGCCACGCCTGCTCCTTGCCCCCTGGGCCCC  
AGCCCCGCCACCCACCACCCACC

>1044

ACTGTCAACCAGGGCAACCAGCCCCAGTGCCGATGCCTACCCGGCTTCTGGGCGACC  
GCTGCCAGTACCGTGAGTGAGCCATCCCTGGGCCCCAGGGCATGCGGGAGGGTGACG  
GGGGACCCAGAGCATGGGGTGATG

>1045

TGAACAAGTGCAGCCGCTGTCTCGAAGGGGCCTGTGTGGTCAACAAGCAGAGTGGGG  
ATGTACCTGCAAGTGAGTGGGGCCCTCCTCCACAGTTCCACCCAGCCGGGCCCTGC  
CCTGTCTAGCCCTGCCCTGCCCT

>1046

TGACCTGCGTCGGCCACTGCAGCAATGGCGGCTCCTGTACCATGAACAGCAAAATGAT  
GCCTGAGTGCCAGTGAGTTGGGCCCGGGCTTACCCAGGCATAGATCATCGCTCCCTT

CCCCAGATTTGAGCAGGAGGACCG

>1047

CTCTGCTGTTGCTGCTGCTGCTGGTTCTGGTGGCCGGAGTGGTATTCTGGTATAAGCGG  
CGAGTCCAAGGGTGAGTCACAGGGATTCTGGAACATTCTGGTCATTATTTGCCATCCT  
AGCCTTCCCCCAATAATCTC

>1048

GTACGAAGGCGGAGAGCCTGATGATGTGGGAGGCCTACTGGACGCTGACTTTGCCCTG  
GACCCTGACAAGGTGGGCTGGGAGGCGGGCAGGGTCAATTGCCAAAAGGCCGTGGGT  
GGCCTAACCAAAGGTGTTGGGTTAG

>1049

CACTTTTATTCTCTGGACTCTGTTTCTCAATGTTGGACCTAAGATATTGAAGACAGGCT  
GGAGTCCAGAGTGAGAGACTTCAACTATTCTTTGTGTGTGTCTGTCGTGTGAGCAAAA  
ATGATGTAGTTAAGAGGCTCCC

>1050

TGAATGAGGCCCTTGGAACTCAAGGATGCCAGGCTGGGAAGGAGCCAGGGGGGAGC  
AGGGCTCACTCCAGGTGAGTGACCTCAGCCCCTTCTGGCCCTTCTCCCCTGCCTTCT  
AGGTTGGAAAGCCATAGGATTCCAT

>1051

GCTCTTCGGGACATTGCCAAGAGTTCTCTGATGACCTGCACCATATCGCCAGCCTCA  
TTGGGAAAGTAGTGAGTAGAAGGAAAAAGGGAGTGCACCCAGGGAGGTCAGGGAGA  
GAGAATGCAGTGTGCAAGATGGGGA

>1052

GACTTTGAGGGCAGCCTTGCTGAAAATCGCTTACAGTCCTCCCAACATAGATCCTG  
AAATTGATGAGAGTGAGTGTGGGTGTGGATGGCCTGTGAGCCCTGCGCAGTGATGG  
AGTACCATCCTTGGCAGGTGGTCA

>1053

GGTTGCCCGCAAGGAGCTGGAGAATCTGGACTCCCGTATTCCTTCATGCAGTGCATCT  
ACATCCCTCTGGTGAGGGCAGGAGAGTGGGTGTAGCCTTCAGATGTCTTTGGGGGAG  
ATATTAGGCTTATGAAAGACATA

>1054

CCCGGACTATGGCTACTCAAGGCCGCGTTACTCCCCACAAGTCCTGGGGTACGAAT  
CCAGAATGGCAGGTAAGAATAGAGCGGGTGGAGGAATAGACATGAGGGGCCCAAAG  
GCTACATCTTCTGGGGGTTTCATCTA

>1055

CAGACTTGATCCGCAGTGGAAAACCCATCAAGCCTGTCAAGGATTTGCTAAAGAAGAA  
CCAAATGGAAGGTGCGTATATGGCCCCAGTGTCTTTACCCTCTCTGCATCTTCTCCTG  
CAACTCTTCTCCCCTTTTCAGGG

>1056

TCTTTCTATTCCCCGCTGCCTCCATGGTAGAGGCCAGTGACTTTGAGATTAATGGACT  
GGACTTCATGGTAAGACCCTCAACCTCTGTAAGGTGAGTGATGAGGAAAATGAGTCAG  
CAGCTGAGGAAGAGCGTACTC

>1057

CTGCACTATCGTAGTGCCGAACCAAGGAGCTGGATGCATTGCTGGGGGACCTGCACT  
GCGAGATCCGGGGTGAGGAAAAGCCAGAGGTTATATGCATTGTAAGATGTTAAAAAAA  
AGCAGCAGCCAGGGGAAGGAGGGG

>1058

CCCGGGACTATGGCTACTCAAGGCCGCTTACTCCCCACAAGTCCTTGGGGTACGAAT  
CCAGAATGGCAGGTAAGAATAGAGGCGGGTGGAGGAATACACATGAGGGGCCAAAG  
GCTACATCTTCTGGGGGTTTCATCTA

>1059

TGGGGACAAAGGGAGGGTCAAAGTCATCACTGGACCCAACATCAGGGAAGAGCAT  
ATACCTCAAACAGGTGAGGAGAAGCCCTGCAGCCTGGGCCTCTGGCGTCTCCTGCATC  
TACTCCACCCCTACTTGCCAGCCAA

>1060

CTTCACACGAATTCATAGCTGCGAATCCATCTCCCTTGGCCTCTCCACCTTCATGATCGA  
CCTCAACCAGGTCAAAGGGAACAAAGGGAGGTGGGATTGAGGAAGGGGATAATGGG  
AAAGGAACCCCTGAAAATGCTCAT

>1061

GAAAGCAGTGAACAATGCCACTGCACAGTCGCTGGTCCTTATTGATGAATTTGAAAAG  
GGAACCAACACGGTGAGGGGAGAACTGATGAGGGGAGAACTAAGGAGGGGAAAA  
TGGAGGAGGATGAAGGAGCATGACAG

>1062

TGTGGCCACCAACTTTCTGAGCCTTGTTTCAGCTACAACCTGCTGCCACAAGGGCCCCTG  
GTGCAGTATTTGGTGAGGAGACCAATCTAGCTCCTCGGGACCCCCAGGCTGGGCATT  
TCCCAGAGGTGGGGATTGGCTCCT

>1063

GGCCAGCCATGCCTCCCACACAGCTGCCAGGCTGGGCTTCTGACAAGCTTGTGGCT  
CGTGGCAAGGAGGTGATGAGATCCAAATGTGCAACCACCTCCACATCAGAGCTCCCTT  
TCATTCTAGTCCTACTGGGCCTG

>1064

CAGATTTGATCCGCAGTGGAAAACCCATCAAGCCTGTCAAGGATTTGCTAAAGAAGAA  
CCAAATGAAAAAGTGCGTATATGGCCCCAGTGTCTTTACCCTCTCTGCATCTTCTCCTG  
CAACTCTTCTCCCCTTTTCAGGG

>1065

CTGCCCTCCACATTCTCCCTGTCTTTTTGGGTTTTGTTTTTTGTTGTTGTGGTGGTTTTT  
TAACACAAAGTCTCACTCTGTTGCCAGGCTGGAGTGCAGTGGCATGATCTTGGCTCA  
CTGCAACCTCTGCCTTCCAGG

>1066

TCCACTAGGACCAGACTGCACCCGGCACACAACACTTGGTTTGCTCAACAAAGCCAA  
AGCACACATCAAGGTGAGAATTTTACTTTTCAGATTTGCACAATTCCTCAGTTCTGGT  
TTAATTATTGGCACTGATTCCTAT

>1067

GAGATGGAACGAATACGAATGGACAGCATTGGATCAACTATTTCTTCAGATCGTTCTGA  
TTCAGAGCGAGGTAGGCAGCTTGCTCTTCTCTAATGAAATACTAAACATCTCTGTATC  
TGGATTTAGGGAAGGTATGTTG

>1068

CATCAAGATGAAGCAGGGGGAGACCCTGGCCCTGAACGAGCGCATCATGCTCTCGCTC  
GTCAGCACTGGGGTGAAGTGGGTGGGCCGCGTGCCGCTGAGGCTCTGCAACCCCGG  
GCGCCCCTGCTAACTGCCCCCCCC

>1069

CTATGCGGCCGAGATCATCCTGGGCCTGGAGCACATGCACAACCGCTTCGTGGTCTAC  
CGGGACCTGAAGGTGAGCATGCCCTGCTGTCCCAGGCTGGACCTCCGTGGCTGTCC

TTCCTTCTCTCGACATCCCGGC

>1070

AGGGGAGGTGAACGCGGCCGACGCCTTCGACATTGGCTCCTTCGATGAGGAGGACAC  
AAAAGGAATCAAGGTACTGGCCTTGCTGGCCTCTGTACCTAGGCTGTGATCCTGGC  
CTGGGGAAGGATCCCTCTCCCTTCT

>1071

CCAGTGGCAGCGGCGGTACTTCTACCTGTTCCCAACCGCCTCGAGTGGCGGGGCGAG  
GGCGAGGCCCGGTAAGGAGCCCATGCGGGGTCCGGGAGCCGGGCTCCGGGTGGC  
TGGCCGGCCCCGCTTTCACCTGCAC

>1072

GCAGATCAAGGAGCGCAAGTGCCTGCTCCTCAAGATCCGCGGTGGGAAACAGTTCATT  
TTGAGTGCATGTGAGTGGGGGCTGAGCCAGGGATGGGAGGCCGAGGGGCCAGGCC  
AGGCAGGCTGGGGAGAGCCCCAGCT

>1073

CAGCCAGGAGACAGAGGCTCTAGGGCGGTCCCAGGGCCGCTTGGAGGCCAAGAAGA  
GAGAGCTGCTGCTGGTGACAGCGGGGGAAGCTGCTTCCATCCACTGAATCTCTGGCTG  
CCCGTGTCCGTGTCCCATGGGTGTC

>1074

CAGCAGCAGCAAGGCCACAAGGCCCGGCTGCCACCCTGAGGGGCAGCTCAAGTTC  
CACCCAGACACAGGTGCTGGCCCTAGTGCAGGGAGGAGGGGCTGCAGGGCTGGACCC  
CTGGGTCTGAGGTTGGAGGGGCTGGG

>1075

GGAAAAGAGCCAAGAGAAGTGCTTGTCTTTGGATGCCAAGTTGCTGAAAATTAATAGC  
ACAGCTGATCTGGTGAGTGTTCATGGATATTTGTTGGGGTGGAGTATTGGTTGATAGGG  
AAATTAATCTGGTTTAAACTGTC

>1076

GGCTGGCAACGAGCAGCGCACGCTCATCAAGGCCTATGGCATCCGCTTCGACATCATT  
GTGTTTGGGAAGGTAGCTCGCCGCACTGGCTCCCCTCCGTCCTCCTGCAGGGACA  
AGGGGCCTCTCCCTGCCCTGCAG

>1077

CCTCTACTGCATGAAGAAAAGACTCTACTATCGGGAGAAGAAATATAAATATGTGGAAG  
ATTACGAGCAGGTAGGCCCTCCTGGCCCCAGCAGGCACAGGCCTCATCTCTTGG  
GTGTGGGAGCCCTGGGCGTGGGC

>1078

CGAGCGTAGTCGGCCTGGACATCAGTCCCATGTGTGACAAGCATAACGGCCTCAGTG  
GAGAAGTCCCAGGTTGGCAGGGGACTGGGCTGAACCGGTAGACTGGGAGGAAGT  
AAAAGGAGGGGCTGAGCCAACCCAC

>1079

GATGGTGGACCTTGCCCATCTGGCTCTTGGTCTCAGAAGAGAAGCTTTGTTTATGTCTG  
GAAGACCTGGGGTGAGGGACTCCCTTCTCAGCCTATCATCCACACTTGTGTTTACTTCT  
TTCTACCTGATCACCTTTCTTT

>1080

GTCTACCATCGCCGGGGATCCCGGAGCTATGTGCCTCTTGCTCATTCCAGCTCAGCCTT  
CACCATTACTGGTAAGGGTTCAGGAAGGGCAAGGCCAGTTGTAGGGCAAAGAGAAGG  
CAGGGAGGCTTGATGGACTGCAA

>1081

TACTGCCTCAATGTGTCTCTGGCTGATACCAACAGCCTGGCAGTGGTCAGCACCCAGC  
TTATCATGCCTGGTAGGTCTTGACAGAGACTAAGTGAGGAGGGAAGTGGATAGAGG  
GGACAGCTGGCAAGCAGCAGACAT

>1082

CCAGTTGCAGCCTGCGATGACACAGCGAATCTATGACAAGTTTATAGCTCAGTTGCAG  
ACATCTATCCGGGTGAGTGGCGGGAAGCCTGGCAGGTGCTGTTGACTTGGGTTCTGTC  
TCCAGATTGTCAGTCCCCTGAGGG

>1083

ACCTAGAAGCTGTCTTGAATGCCTTGGATAAAAATTGTGGAAGAAGGCAAAGTCCGCAA  
AGAGCCAGCCTGGTGAGAGTGGGGTGGGGAGGTGAGAAGGTACAGGAAAGAGGCAG  
CAATTAAGCTTTTTTTTTTTTTTTTTT

>1084

CGTCTGGCAGGGCGGAGGCAGGTGGAGGAGCTGCAGCTACAGGTCCAGGCCAGCA  
GCAGGCCTGGCAGGTGAGTGTCCAGCCTGCCTCTTCTTCTTCTTAATGGGCC  
TCTGAGATCCGCAAATTGGTGGCT

>1085

GGTGAAGGAGACCAGCATGCCTGTGTACTGCACGTGCGCGGGAGACTTCGCCCTCAC  
CATCCACACCCAGGTGGGCTCTCCCTCATCTGCCTCGGCTCAGCCTGGCCTCCTTGGCC  
TCCTCTGAGTGGACTGGGGTCT

>1086

CCTGAACCAGAAGTATGGCCCTGACTTCAAGGACCGGTACCAGATTGAGCTGCTGCTG  
CGGGAGCTGGATGTGAGCGATGGCCCAGGACCCCTGCTGGCCCCGGGGGCGGGGGAC  
CCCTCTACACCATGCCTGCCCTCAG

>1087

CAAGTACCGCCGGGAGACTCCGCTCAAGCCCATCCCCGTGGAGGCACTCTGTGACTTT  
GAGGGGGAGCAGGTGCGTGGGGCCAGCTCCTCTGTTACATCACTACAGAGTTTTTGG  
GGTAACATGGTTGGATCCCGGGCC

>1088

AGCTGATTGCTCCGGCCGTCTGTTTTGTGATCCCCCCACAGACCCTGAGGCCCTGGCT  
CTGGCTGACAGGTACAAGGGCAAAGGCGGGAGTCTGCATGGACCAGTCCCACCCCA  
GGGCTTCTCAGGCCCCATTCATAG

>1089

CAGAAGGCAGCTGGGAGCAAACGCACGCTGCAGCAGCGGTATGAGGTGCTGAAGACC  
GAGAATCCCGGAGGTGGGTGCCAGGGCCACTCGCCTGAGGCTCTGGGGGTACCGGGG  
AGGAGGGGCTGGACCAGGGTCTGTGC

>1090

GATCCTGCGGCCACCACTGGAGCAAGGCCGGGCTGTGCAGGACAGTGCCGAGCGGGC  
CAAGGACCTCAAGGTACCTGCGGGTCAAGGAGCACAGGTGGGGCCGGGGGAGCCCTGC  
ACTGGCCCCCTGGGGCCCTATTTGA

>1091

GGACCCGGGTGGAGGACACCAACCGGAAATACGAGCACCTCCTGCAGCTGCTGGACT  
TGGCCCAGGAGAAGTGGGTGGCAGACAGGCAGCATGGAGGTTGGGGTGGGGTCAGG  
GGGCCAGGTGGGCATCCCCGACGCCT

>1092

CCATCTGAATCAGGATGACACAGTGCCTGAGAGCAGCCGTGCTCCTGGACAGCAAGGG  
GCAGGAGCTGGCGGTGAGTCTAGGGCCCAAGTCTGGGAGTCTTCTCTGAGCAGGT



GAGAGCATCTGGCACATCCACCCGCC

>1093

AGCGCCAGGAGGCCGAGGTGCACAAGCTGGGCCAGCGTTTCAACAACCTGCGCCAGC  
AGGTGGAACGCAGGTGAGGGTGCAGGTGGGTGGTGGCCATTTTTGTTTTCTGAGAATGC  
GATCTAATCCCTCTAAGCAATGCT

>1094

CATCCCCAGTTACGAGCCCCAGGAGACAGACAGCCTCAGCCAGATGGAGACCAAGCT  
GAAGAACCAGAAGGTGAGATGGCCGTTTCCGCAGCCCCAGGCACACACTGGCAAGGG  
AGGGTCAGAGGTCAACAAGCCCCTT

>1095

GATAGCAAGTAGGGAGCAGGAAGTACAGAAGATCTGTGCCAATCCCAGCAGTACCA  
GCAAGCTGTAAAGGTGAGCCGGGAAACTCCGCCAAAGCACAAACAGCAGGGGTCT  
TATCCACCGTGCCCTGGTCAGAGAA

>1096

GAATGGAAGGAGCAGCCACGTGAGCAAGAGAGCCAGGCTCCAATCTCCTGCCACCAA  
AGTGAAGGAAGAGGTGAGTTCATGGGCCAGGCGGCCTCGGGACTGAGGTGGAGGC  
CAAGCTGCCCTGCTCCCCAGGGAGCAT

>1097

CACTGAAGTTTATGCCATCAACAGACAGAGGCTGCAGAATCTGGAGTTTGCTCTGAAT  
CTCCTCAGACAGGTAAGTATCTTAGTAAGAAATTCTACTTCAGGCTGTTCTAACAGGT  
GACAAATACAGACTCTGTCTTAG

>1098

ACCGGCACCTGGCCCAACAACCAGTTTGACACAGAGATGCTGCAAGCCATGATCTTGG  
CGTCCGCCAGTGGTAAGTGGTGTGAGTGTGTATGGAAGAGTGGGAGACCTGGGGTT  
CTGGGGTGCATCTCACAGCCACCA

>1099

CCACGTCCGTGAGCAGATTCTCATGAAGAGGTTGAGATCTTTGCAACCTGTCTCTG  
GACGCCATGGAGGTGAGCCGCCAGCGGGGCCGGATGGATGTTGCTTCCAATGCAG  
GTGGAATGCGTCGGGGCTCCTGCGTT

>1100

CTGGCACTAATTGATCAGGATGCTGGGCAGGAGGATGGAGTCGCGATACCACTGCCAG  
GCGTCAGGAAAGGTGAGCAGAGGTTCTCCCGCATCTGCCACCACTACCGGTCCTG  
GGTGACCACGCATTCATGCCCTG

>1101

CTCATGGCCCTCCGGCTCAACGAGAGCAAAGTGGTGCAGGAGGCCCTGGAGGCGGTG  
CCCAGGGGCGAGAGTGTGAGTTGGGGCTTCGGTGTGGGGCGCCGGGGTCATCCTCTTTC  
CCCTGGTTTGAGTTGGTGGCAGAAT

>1102

GCCACCTGGAATTCTACCTCCTCTGACTCACAACTGCTCATGTTGCACGGACAGAA  
GCTGAAGTCCAGGTAGAGGGTCTCCCCGCAGTTCATCGGTGGCTCAGGTACTGGAC  
CAGCTTGTCTGCTGGATAAAAGG

>1103

GGACGCTGCTGCCTGTCATTAGTTCCTCCAGAAGAGCATCCAGCGGCACCTGGACGA  
CCTGTGAAAAGTGTACGTGTGGGTGCAGGGCCTGGGGTGGGTGGGGTGCACGGTCC  
CCTGCTGGTCCCACTGTGGAGTGC

>1104

GTGGCTTCTTCTCCCCAAACAGCCCGACCTGTTCAAGGACATTGTCAATATGCTCATG  
CACCATGACCGGTGAGCTGGTTGGCCCCGGAATCACTCAGGTGGGGCCGCAGGGCAG  
ATCGAGGCTCAGGTGTGTGGTGGG

>1105

AGGAGGCAGTGGAGGAAGTGGGGGTTATGGTGGGAGGAGCCGATACTGAGCTTCTTC  
CTATTTGCCATGGGTAAGTAGCTTTTGGATTTTACAATTATTATTATCTTGGGGAGACATA  
GCTGCAGGAGTAAAAGCTTTTT

>1106

CCAGGCCCTACAGGAGCTCATCTCAGAGCTAGATCGAAGGTGCCACAGCTCAGCACTG  
GAACTGCTGCAGGTGAGACAGGGAGGGGTTCCCTTCTACAATTCAGGGAATAACTGA  
AAAAGACCAGAGCTATCTGGAAGT

>1107

ATTACCTCTCCAGAACTCAGGAGTGTGTGCCATGTGCCAGGGCTGAAGAAGATGCTGA  
GGACATGTGCAGGTGAGGCAAGTTCTAGTTTTGCGGGGATAATGGGGTGCAGAGTAG  
ATCCAGGGTCAGGGAGCCTGGAT

>1108

CTACGCCATCGCCATGGAGGAGATCAGCCGTGGCTGCGCCTCCACCGGAGTCATCATG  
AGTGTCAACAACGTGAGCCCCCTCCAGGCCCTGGGACACACGGGTGGAGGGAGGC  
TCCCGTGAGCGGGCAGGCTCTGGCC

>1109

CAGAAGCAGGCGTGGGTACGCCTTACCAGTGGTGACAAAATTGGCTGCTTTGCC  
TCAGCGAACAGGTACTGCCCTGTCCCTCACCTGTCTTAGGGTGACAGGCCCAGA  
GGGGAGGAGAGGAAGGTGCTAGGC

>1110

GATACCAATGCCTGGGAGGCTTCGGCTGCCGTGGTCTTTGCCAGCACGGACAGAGCC  
CTGCAAAACAAGGTGGGCCACCCAGAGAGGGTTAGCCGATCCTGGGCTGCTGT  
CATTTCTGTTTCTAGGGCCTTCTCT

>1111

CTTTGAGGACTGTGCGATCCCCAAGGACAGCATCCTGGGGGAGCCAGGGATGGGCTTC  
AAGATAGCCATGGTGAGCCCGCAGTGGGGGTGGCACCTTGAGGCCAGGCCCGCGCC  
CCGGCTGGCGGGCCACTGACCAGGG

>1112

TTGTGCTGTGAACTACGCTGAGAATCGCATGGCCTTCGGGGCGCCCCTACCAAGCTC  
CAGGTATCCAGGTAATGGTGGCAGCTTAGGAGCTGGGCCTAGAGGCTGGACAGCGG  
GCGGAGAGTGTGGCCTCCTGACTG

>1113

CCTGGAGAGTGCCCGGCTGCTGACCTGGCGCGCTGCCATGCTGAAGGATAACAAGAA  
GCCTTTCATCAAGGTGCCACAGGGGTCCCCGAGCCATGGCCCAGAATGTGGTGGGCC  
CAGGGACGGGGAGAGGTTGGGGCGG

>1114

CACAGTGAACCACAAACAGTTCTCCCTGAACTGGACTTACCAGGAGTGCAACAAGT  
CTCTGAGGAGATGGTGAAGTCTGGGCTGAAGGCAGGGGCAGGGGAGGAGGTAGGAG  
CCCCATGGCATGAAGCCCCTGGTCCCA

>1115

TGCTACATCATGAACCCCTGACCGCCACCGTGGCCATGGCAAGATCCATCTGCAGGT  
CCTCATGGAAGGTGAAGGCTGGGGTGCCAGCTGCGGGGCCCTGACCTTCCACCCA

CCTACTCTCTGCGGCATTGCTCA

>1116

GTATCTCAGAAAAGAAGACATGGAATATGCCCTGCGTAAACTGGATGACACCAAATTC  
CGCTCTCATGAGGTGGGTCCTTGCCTTCTGTTGAGGAGCTTGTACTCAAATCACTCCAC  
TTGAACCTGACCTAGCAGAGGTA

>1117

GCACCAGGACATGCACAGCTACATCGCGGCCTTCGGGGCCGTCACGGGCCTCTGCACG  
CTCTTACCCTGGTCAGCCGCGGGAGGGCAGGCCCGGGGGCCCTCAGCCTGGAACG  
TGGGAAGAGAGCCAGAGGGAAGGGG

>1118

AGTTCATGGATGGTGCCCGCCGAGAGATCGTCTGCCGTGCAGATGGCACCATGAGGCT  
TGGGGAGCCCACGTAGGTGTCTTGGGGACCCAGAGGTGAAGGTACAGGGAGGAAGG  
CTGAAGTGTGCGTTTACCCCAAAGGG

>1119

CTCCTACTTCCACCTGCTCACCTGGTCACTCCCCTTTGTCCTCACTGTGGCAATCCTTG  
CTGTGGCGCAGGTATAGTACTGGTAGGAACGGGAGACCTGGATGGGGTGAGTTTGA  
GGGAGGGGGCCAGTAACCCACCTT

>1120

TACCGTGCGGGCTTCGTGCTGGCCCAATCGGCCTGGTGCTCATCGTGGGAGGCTACT  
TCCTCATCCGAGGTGAGTGAAGACCAGGCCAGGACCAGTTGGGCAACAAAATGTACT  
GGGCACTTGCTGCCAGTACTGGGAG

>1121

AAGAGCAACCACCCGGGCTGCTGAGTGAGAAGGCTGCCAGCAAGATCAACGAGAC  
CATGCTGCGCCTGGGTGAGTGGCCCCGGGGGACTTCGGTCTGAGGTCTGGCCAGCCC  
AACACTGCACCCTCTGGGGCTATGC

>1122

CCTTCAGCTGCCACTTCTACGACTTCTTCAACCAGGCTGAGTGGGAGCGCAGCTTCCG  
GGACTATGTGCTGTGAGTGAAGGGCATGGAGGCGGCAGTGCTGGGAGCTGGAGCCAA  
GGCCATAAAGACACCCACCTCCACC

>1123

CTGGCATCGCCATGAGCACCTGGGTCTGGACCAAGGCCACGCTGCTCATCTGGAGGCG  
TACCTGGTGAGGTGGGCATGGCAGCCAGCCCCTCCTGCCCTGCCCGCCTACCCTCA  
GCCTTGGGACCCCATCTTTAGGTT

>1124

GAGCTCCTGCAGAACCCAGGCCAGGAGCTGTCTTCAGCATGCACACTGTGTCCCAGG  
ACGGGCCCGTGGGTGAGCCTACCCCTCCTCTACCGGAGCCGCCTGGCCCCGCGCTGC  
CCATGTGCTAGTCTCTCCAGCCT

>1125

ACCAAGATGGTGGCTCGGAGAGGAGCCATACTGCCCCAGGATATTTCTGTCACCCCTG  
TGGCAACTCCAGGTATGAGAGTTCAAGCTTCTGGAGGAAGGTGGGGGGAGCACAGAG  
GCTGGGGGCTTCTGGGACTGGAGTA

>1126

CCACCGTACCCCTACTGCATGCAGCCATCCGGGAGGTGGATATCAAGGGCGTGTTCGA  
TACTGCAACACGTGAGTATGCTGTGGGTGAAGCCGGGATGCCAGCCTCCAGCAAGAC  
CATGGCAGGCCCCACTCAGCCTC

>1127

CCTTTTGGCAGTGGTTTGTATGGTGTCTGGACCTACCAAACGCTGTCTCCGGAGCTA  
CTGGTCTGACCGGTGAGTCCCCACCCTGGGTAGTTTGAGCAGCCATACACCAGTCACC  
TCCATACTCACTGCCCATGCCCA

>1128

TTTCTCTCCGCTTCAGCGACTCAGAGATTGGGGGCATCACCATTGCCCATGTCATCCG  
GGGCCAGGATGGTGAGGCCACCCAGCCAGTCCTCTGTCTGTGCCTGTGCCCTCTG  
GGGTTTCTTCTGGGAATGAAATG

>1129

GATCTTGCTCAGCTCAAAAATCTCTATCCCAAGAAGCCCAAGGATGAGGCTTTCCGGA  
GCCACTACAAGCGTGAGCTGGAACCTGGCAGCTCTGATTCCTTCTGTACCCACTTCC  
TGCCATGCTCCCCGCTGCCATCCT

>1130

TGGTGCCTTCTTATGACCTTGAATGGCCCCTGATTCCTCCATGAGCATGCAGCTTGGC  
CCAGATATGGTGAAGGAGCTGGAAAGACAGGAATGGGAGTGGTCTGTGCAGATGGG  
CTAATCTTAGCATGGGCAGCTGGG

>1131

CTCACTCCATCCCCCGTATCAAGGCCTCTCCCCAGAAGAATCAGTCAACGTGTTGTCA  
GCCTTCCAGGAGTAAGTGAAAAACCTCATGGGGATACCATCCCACTTAAGGGGGTGG  
GCATTTGAATTGTTAGAAGAGGC

>1132

GCTCAGATGTGACCATGGTGAAGACAGCTGCCTGAGCCAGCCAGTGACAGCGTTTC  
CTCAGGGCACTTGGTGAGTGGCAGCTTGGGAGTGGAGGCTGGGTGGCATCTAGGGGA  
GTGGGCGCCATGCCTACTCCACTGCT

>1133

TTACTGGTGTATCCCCGGAGCACCCAAAACGCTGGGGCCAAGTCAGCGAGGCCTAC  
GTGAGCCTCCTAGGTATGCCTTTGTCTGTCTCCGTCAGGAAAGGTGTGGGAGTGGATC  
TGGGACGGGGCCATGACCTGTCAGA

>1134

CGCCATCACCCGAAGAGAGAAGCTGACCAGGCCGGCCGCTCCCCTGCTGTGGGCG  
AGAAGCTGAAAAGTGAGCGGGCGGGTCTGGAGGAAGAGGGCTGCCAATCTCGGG  
TGGGGAGGGTGAACATCACTGTTTTCT

>1135

CGAGAGAAGGAGAGAGAAGAGTGGGAACGCCAGTACAGCCGGCAGAGCCGCTCACC  
CTCCCCCGATACAGTGAGTGTCCCCACCAGGCTGCAGGGCTCTGGGGCTTTAAAGAA  
AAGTGCAAGCAGGGTTACCAAAAAA

>1136

TTTTTGTGTTGTTGGAGCAGAAATACTAAAGAAGATTCCGGGCCGAGTATCCACAGA  
AGTAGACGCAAGGTAAGGATGCTTGCTCCTGCACTGGATGGGCTGGTCAGGTGTCCAC  
AGTTGCACACGTGGATGCCAACAT

>1137

AAGCTGGGATCAGCAAGGACCGAATTCTTATAAAGCTGTCATCAACCTGGGAAGGAAT  
TCAGGCTGGAAAGTAAGTGTCCCCACAAGGAAGGAGCTCTCAGAGATTTTCTCTG  
TTGGAGCAGGGTCTACATGGCATC

>1138

TTGGGCGCATCCTTGATTGGCATGTGGCAAACACCGACAAGAAATCCTATGAGCCCCT  
GGAAGACCCTGGGTGAGGGTCCCTCTGTGGTAATGGGGTAAGGGGAGCAGCCTCAGC

AGCACCTGAGGCAGGAAGAGCCCGA

>1139

TCACCCAAGCTCCTGGGAGAGCTGCTGCAGGACAACGCCAAGCTGGTGCCTGTGCTC  
TCAGCCAAGGCGGGTGAGGCCCACTGCCAGCTGTGGCTCCTGCTCGGGCAAGGCC  
AGCACTGCCCTGCCACGCTGCCCTGT

>1140

TGTGGAGAAGCTCTCTGACGGGATCCGCAAGTTTGCCGCTGATGCAGTGAAGCTGGA  
GCGGATGCTGACAGTGAGTGTGTGTGGGTACCTACATATGCCAACCCCTATGAGAG  
CCCGGGCCTGGGCGTCGGGGTTCA

>1141

GAAGAAGAAAGCAAAAAAGCCTCAACCAAAGATTCTGAGTCACCGTCCCAGAAGA  
AAAAGAAGAAAAGGTAGAGAGTTCCTGGGGTGTCTCAGGCCAGAAAACAGACCCA  
AACCCAAGCCCCCTCTACACACCCAGA

>1142

GTACATGCGACAGTTCGTGGCTCACCTGCAGGAGACCAGCCCGCTGAGGGATGCCGTC  
GTCATCGAGCAGGTCTGGGCACTGCCCTGCAGGGTTGGGCACGGACTCCCAGCAGTG  
GGTCTCCCCTGGGCAATCACTGGG

>1143

AGGCCAGCAGTGGCCTCTTCGACGTCTTCTACGCTTCATGTGCCACCACGCCGTGCG  
CATCAGGGGCAAGTGAGTCAGGTGGCCAGGTGCCATTGCCCTGCGGGTGGCTGGGCG  
GGCTGGCAGGGCTTCTGCTCACCTC

>1144

CCACGCTGCTCTGCAGCCTGTGCTACGGCGACATGGAGAACAAGCTGTTTGCGGGGAT  
TCGGCGGGACGGGTGAGGCCTCCTCTCCCCAGGGGGGCTGGGTGGGGGTTGATTTG  
CTTTTGATGCATTCAGTGTTAATA

>1145

TGCTCCTGCGTTTGGTGGATGATTTCTTGTGGTGACACCTCACCTCACCCACGCGAAA  
ACCTTCTCAGGTGAGGCCCGTGCCGTGTGTCTGTGGGGACCTCCACAGCCTGTGGGC  
TTTGACAGTTGAGCCCCCGTGTC

>1146

ACGGCCTATTCCCCTGGTGCGGCCTGCTGCTGGATACCCGGACCCTGGAGGTGCAGAG  
CGACTACTCCAGGTGAGCGCACCTGGCCGGAAGTGGAGCCTGTGCCCGGCTGGGGCA  
GGTGCTGCTGCAGGGCCGTTGCGTC

>1147

GAGGAACATGCGTCGCAAACCTTTGGGGTCTTGGCGCTGAAGTGTACAGCCTGTTT  
CTGGATTTGCAGGTGAGCAGGCTGATGGTCAGCACAGAGTTCAGAGTTCAGGAGGTG  
TGTGCGCAAGTATGTGTGTGTGT

>1148

ACATTTTTCTGCGGTCATCTCTGACACGGCCTCCCTCTGCTACTCCATCCTGAAAGC  
CAAGAACGCAGGTATGTGCAGGTGCCTGGCCTCAGTGGCAGCAGTGCCTGCCTGCTG  
GTGTTAGTGTGTCAGGAGACTGAG

>1149

GAAGCCATCCACTTCTGATGATTCTGACTCTAATTTTGAGAAAATTGTTTCGAAAGCAG  
TCACAAGCAAGGTGAGTGTGATCCTAGTCAGTCCTTTTGCTGTAGATGTTCTGAAACA  
CGTAACTAAGCCATTGTTCTTA

>1150

GTGGCCCTCACTTCCAGACCTGCACCGGGTCTAGGCCAGTACCTTAGGGACACTGCA  
GCCCTGAGCCCGGTGAGTGTGCTTCCCTCCCCTGTGCCACCACCAACCCTGCCTGGT  
ACTGGATCCTTGCCCCAACAATAC

>1151

GCTGGACCTGGACTTTGACCCCTCCCGCCCGTGACGAGCCCTGTGAAGGCACCCAC  
GCCCTCTGGTCAGGTTGGTTGTGCCACCCTGCCATGGGCCACCAGCTTCCAGGT  
GCCCAACCCTGGGCTCATGTTGCCT

>1152

GCCCAGCGCTGCCGAGGGCACCTTTGCTGTGTCCTGGCCCAGCCAGACGGCCGAGCC  
GGGGCCTGCCAAGTAAGTGCCACCTCCAGCCCCTGTCTGGCTTGTCCCAGTCTCT  
AGGGGTGCAGCATGGAAGGAGAGCC

>1153

GGCGGGTGGGACCCAACCTGCGGCTGGAGCCAGGAGCCAGGGGAGACGGCGGCAA  
GTGAAGCAGCCTCCGTAAGACAGCAGGGACAAAGCCCTGCCTTTTCTCCCTGCCGCC  
CGCCTGCCTGTCCGGGGCTCCCCTGT

>1154

TGTGAATGGCACCGTGGAGGGCGGCTGTGGGGCCGGGCGCTTGGACCTGCCCCAGG  
TTTCATGTTCAAGGTGAGCCACAGCCTCTGACTGCTGCAGTCCCTCGGTGCCCTGGT  
GGGCAGATGACAACCCTGAGCCTCA

>1155

GGCGGACTCTGTGAGGAAACAAGAAGAGAGGCCCAAGATGGAGACGGCGGGGCTG  
TAGCGGCGTGACAGGTGAGGGCGGGCCCGGAGGGCTCGGTTTCTGGAGCGGCTGCC  
GGGCACGGGCAGGGAGCCCGACCGAA

>1156

CAATGGGGCCGAGCCATCCCGGGCAGTGGGCACCGTCAAAGTATACCTGCCCAACAA  
GCAACGCACGGTGGTGAGTCATGGAAGCGAAATGGCAGGGGCTGTGGATGGACCCAG  
TTGTAACCTCTGGGATCAAAAGGGTGA

>1157

CTTAGACAAGGCCCTGAAGGTGCGGGTCTAAATCAGGACTGCTGTGTGGTCTACCG  
ACTCATCAAGGGGTGAGTGTGGCAGCCCCACGCCACCCACTGGGTGTCCCACCTCCC  
ATCCCCTCCTCAGTCATTTGATTC

>1158

TGCTCCCCTGGATGGCGAGGAGCTCATTGTGAGGTCCTTGAAGATGTCCCGCTGACC  
ATGCACAATTTGTGAGTGCAGGGTGGACGGTGGGGGTGGACCATGGTTGGGGGTGTC  
CTTGACCAGGTCTCAAACCTCCCT

>1159

ACAAGTTCCACCAGCATTGTTCTCCAAGGTCCCCACAGTCTGTGTTGACATGAGTAC  
CAACCGCAACAGTGAGCCAGCCTGGGGTGGGTGGGGGGATATGGGGAGCACAGAG  
GCCCAGCCACGAGGCCCTTACAGAC

>1160

GAGGCTCCAGACAGCATGAGGCTCCCTCGAACCGCCCCCTGAATGAGTTGCTAACCCC  
CCAGGGTCCCAGGTAGGGATGCCTTAGCTGAAGAGCTGCTGGGGGAGAAAAAGATCT  
TGGGGCTCTTGTAGACCACGAGCCA

>1161

CCGCTCCACGTCCACTCCCAACGTCCATATGGTCAGCACCACGGCCCCCATGGACTCC  
AACCTCATCCAGGTTGGTGCTGTGGGGGACAATGCCGGGGACCACAGGGCAGAGGGT

AGAGCCATCCCTGTTGGCCTCCATG

>1162

GTCCCCACATTCCAAGTCACCAGCAGAGCAGCGGAGCGGAAGTCCTTGGCCGATGA  
CAAGAAGAAAGTGGTATGCTCGAGGGGGATCCTTTTGGGGCCACCAAGGCTGAGTGA  
CGTGGGATGAGGGATGTGGGCAGGCC

>1163

AGGTGCTCAAGGTGTCCCAGCCCACAGCTGAGCAGGCCAGGCTTTCAAGAATGAGA  
TGCAGGTGCTCAGGTGAGGTGGCATGTGTGCGTGGATGGGGGTGGCAGGCCCGGCCT  
TGGCATCTCTCTGGGAAAAGGCCATG

>1164

ATGTGGCCGACACACGCTTCGACATGGTCCAGCTCATCGACGTGGCCCGGCAGACTGC  
CCAGGGCATGGAGTGAGCCTCCAGCCTGGGGAGGGGTGGGGGAAGGGTGGGGGAA  
ATGAGGTAACCCCCAGCCAATCCGCC

>1165

GGCCACAGTGAAGACTCGATGGAGCGGGGCCAGCCCTTGGAGCAGCCCTCAGGATC  
TGTGCTGTGGATGGTGTAGTTGGGCCAGGCTGAATGGGGGGCACATGGGGACGTGGGC  
TCCGGGATTGGGGAGTGTGGGGCCAA

>1166

CTACGGGGTTGTGCTCTACGAGCTTATGACTGGCTCACTGCCTTACAGCCACATTGGCT  
GCCGTGACCAGGTGAGCCCCACACCTTACCCACAGTTCCTTGGCCTGAGGGATCCCT  
CAGGCATCCATACCCACATCCC

>1167

CAAGGCCATGCGGCGCCTGCTGTCTGACTGCCTCAAGTTCAGCGGGAGGAGCGGCC  
CCTCTTCCCCAGGTGGGTGGGTAGGGGGCTGGACACCTTGGGTGGGTGACTCTGGG  
TTAGAGGAAGACTGAGATGGAGGCA

>1168

TGAGCACCTGGTTACCACTGCCACCTTCTCCATCGGCTCCACTGGCCTCGTGGTGTATG  
ACTACCAGCAGGTGGGTATGCCAGACCTCCTGACCTGGACCAATGACAAGGCTCTGCT  
AGAGCCACCCAGCTGGGCCACTT

>1169

CATCATGAAGATAGCTCCAGAGAGCATCCCAGTCTTGAGGCTCTCACTAGAAAAGTC  
CACAACCTCCAGGTGTGTGTGTGGGTGAAAAGAGTGGGCTGTCTCCCTCCAGGG  
CTGCTGGGAGGAGTGTCCGAATGGT

>1170

TACGTGTGCCGGGTCCAGGAGGGCAACGAGTCATACCAGCAGTCTGCGGCACCTACC  
TCCGCGTGCCCGTGAGTGCCAGCCCTGGCCCCTACTCCCACTGTCCCGCTGGGCA  
CTCGGTTTATCTTTGAAGTGGGGA

>1171

AATCATCACAGCCGAGGGGATCATCCTCCTGTTCTGCGCGGTGGTGCCTGGGACGCTG  
CTGCTGTTCCAGGGTGAGCCCCCTCGGACCTCTGAGTCAGCCGGGCGAGGGCTGGGCG  
AGGGACCCCAATACCCAGGTAGCC

>1172

AGGAACCCTGCGGAGGGACTTCAATCACATCAATGTAGA ACTCAGCCTTCTTGAAAG  
AAAAAAAAGAGGGTGAGGGTTTTTCTTCTGATAATTGAGTTGCTCGTTGGAAGGTGGT  
TTATAACAGCATCACATTTGGTTG

>1173

CAGAAAGGAACTGGCTACCGTTCGGACTATTTGTAGTCATGTACAGAACATGATCAAG  
GGTGTACTACTGGTAAGCAGATGTATCAGACTTCCTTGTGTTTGGAAAGGGAGGTTTCTC  
AAACCTGTGCTTTATACAGCGTA

>1174

AATGGGTCTCTTGTGAAATCCGAAATTTCTTGGGTGAAAAATACATCCGCAGGGTTCG  
GATGAGACCAGGTATGTGCATACCCTCAGACAGAATTAAGAAATTTTCCTTCATATTTT  
TTTCTCCTTTTCCACTCCCA

>1175

TCAGTATCTCAAGCCCAGAAAGATGAATTAATCCTTGAAGGAAATGACATTGAGCTTGT  
TTCAAATTCAGGTTTGTATGTTTACTATGTCTAACTATGCCTACAAGATTTTGTCTAAATC  
TTGTTTAAAATACAGTATTT

>1176

AAATTTTGGATGGTATCTATGTCTCTGAAAAAGGAACTGTTTCAGCAGGCTGATGAATA  
AGATCTAAGAGGTAAGTTCTTACAGTGTCTTAAGTTTTATTACTGCTCTAGTTGAATGAA  
GCTCTTAATTTACTAAAAGAC

>1177

TCAGGGGACAGGGAGAGCAAGAGGTCAAGAGCTGTGGGACACCACAGAGCAGCACT  
GAAGGAGAAGACCTGTAAGTTGGCCTTTGTTAGAACCTCCAGGGTGTGGTTCTCAGCT  
GTGGCCACTTACACCCTCCCTCTCTC

>1178

TTAGAGAACAGGCCAACCTGGAGGACAGGAGTCCCAGGAGAACCCAGAGGATCACTG  
GAGGAGAACAAGTGTAAGTAGGCCTTTGTTAGATTCTCCATGGTTCATATCTCATCTGA  
GTCTGTTCTCACGCTCCCTCTCTC

>1179

AGCTTCTGCGTCTGACTCGCAGCTTGAGACTGGCGGAGGGAAGCCCGCCAGGCTCTA  
TAAGGAGACAAGGTGAGATGCTGAGGGAGGACTCAGGAGGACCCCCACCCACATAG  
ACGACCACAAAAAATCCAACACCAC

>1180

GAGCTGCTCTGTCTGACCAGCAGCTTGGGATTGGCGGAGGGAAGCGGGCCAGGCCCT  
GTGAGGAGTCAAGGTGAGACGCTGAGGGAGGACTCAGGAGGCCCCACCCACAGATAG  
ATGACCCCAAATAATCCCGCACCCT

>1181

GAGCTGCTCTGTCTGACCAGCAGCTTGGGATTGGCGGAGGGAAGCGGGCCAGGCCCT  
GTGAGGAGTCAAGGTGAGACGCTGAGGGAGGACTCAGGAGGCCCCACCCACAGATAG  
ACGACCCCAAATAATCCCGCACCCT

>1182

AAGCGAGCTGCTCTGACCAGCCGCTTGGGATTGGCGGAGGGAAGCGGGCCAGGCCCT  
GTGAGGAGTCAAGGTGAGATGCTGAGGGAGGACTCAGGAGGCCCCACCCACAGATAG  
ACGACCCCAAATAATCCCGCACCCT

>1183

GCGAGCTGCTGTCTGACCAGCAGCTTGGGATTGGTGAAGGAAGCAGGCCAGGCCCT  
GTGAGGAGTCAAGGTGAGACGCTGAGGGAGGACTCAGGAGGCCACCACCCACAGATAG  
AAGACCCCAAATAATCCCGCACCCT

>1184

GAGCTGCTCTGTCTGACCAGCAGCTTGGGACTGGTGGAGGGAAGCGGGCCAGGCCCT  
GTGAGGAGTCAAGGTGAGACGCTGAGGGAGGACTCAGGAGGCCCCACCCGAGATA



GACAATCCCAAATAATCCCGAACCACT

>1185

TCTGAGCAGACAGGCCAACCGGAGGACAGGATTCCCTGGAGGCCACAGAGGAGCAC  
CAAGGAGAAGATCTGTAAGTAAGCCTTTGTTAGAGCCTCTAAGATTTGGTTCTCAGCTG  
AGGTCTCTCACATGCTCCCTCTCTC

>1186

TGACCAGGATCACCAGGAAGCTCCAGAGGATCCCCAGGAGGCCCTAGAGGAGCACCA  
AAGGAGAAGATCTGTAAGTAAGCCTTTGTTAGAGCCTCCAAGGTTTCAGTTTTAGCTG  
AGGCTTCTCACATGCTCCCTCTCTC

>1187

TCAGCGACAGGCCGGCCAGGAGGTCAGAAGCCCCAGGAGGCCCCAGAGGAGCACCC  
GAAGGAGAAGATCTGTAAGTAGGCCTTTGTTAGGGCCTCCAGGGCGTGGTTCACAAAT  
GAGGCCCTCACAAGCTCCTTCTCTC

>1188

CTGTGAGCGAGGACCCGGTTCGCCCGAAGGATGAAGACTTGTCTTTAAAGATGACAA  
CGTACAGGAAAGGTCCATCAGCCGATCTCCCCCTGCCTGGGCCACAGCGCCCCCAA  
ACCCTCACCACCTCTCTCACTGC

>1189

TCTTCTACCCATCTGCTCCCCAGAGGGCTGCCTGCTGTGCACTTGGGTCTGGAGCCC  
TTCTCCACCCGGTGAGTGGCCAGCAGGGTGTGGGGTTATGTGAGGGTAGAAAGGACA  
GCAAAGAGAAATGGGCTCCAGCT

>1190

GGCGGCACGGCTCGGAGGCAGCGGTTGGGCTCGCGGCGAGGACGGGGTCGAGTCAG  
TGCGTTTCGCGGAGGTGAGAGCGGGCAGGGCGCGTGTGCGGTACCTTGGCTTGGGCC  
CGGGAGAAGATGGAAGTGCAGCGGGGT

>1191

GCTCAAAGGCCGGCCATGTAAGATCGTCGAGATGTCTACTTGAAGACTGGCAAGCAC  
GGCCACGCCAAGGTTAGAATTCACCTCCGCATCTTGCCTTCCCATGCCTCCAGTATC  
TTTGGCCCCTCCAGCAGCAAGC

>1192

GAAATATGAAGATATCTGCCGTCAACTCATAATATGGATGTCCCCAACATCAAAGGA  
ATGACTTCCAGGTATGTAGATGGTCTGGATGAGGATGGGTTAGCGGTTTATGGTGGAGG  
GAGGGGTTGGGGATAGGGACT

>1193

CCTTCGTCTCCCTGAGGGAGACCTTGGCAAGGAGATTGAGCAGAAGTACGACTGTGG  
AGAAGAGATCCTGGTATGGTGCCTCCCTCCCTGCTTTTGTGCTCAGCTTTGTTCTGTAC  
GTTTCTTCTGAGCTCAGACATCT

>1194

CGGTGCTGTCTGCCATGACAGAGGAGGCAGCTGTTGCAATCAAGGCCATGGCAAATA  
ACTGGCTCCAGGTGAGTGTGACAAATCCCTCACTGTCCCCTTACATTTTGTGTCCT  
CAGCAGAGCTGCTGTAGCTTAA

>1195

TTTACTCGCACAGCCTCCTGCCTGTGGACATTCGACAGTACTTGGCTGTCTGGATTGAA  
GACCAGAAGTGGTGGGCTTCAGGAAGTTGGGGGAATGAAAAAGGTGGCCTTCCAC  
TTCTGGGCCCCGGGATCCTGGAA

>1196

CCGTTGCAGCCAGGACCCAGAGTCCTTGTTGCTGCAGCACAATTTGCGGAAATTCTGC  
CGGGACATTCAGGTACTIONTGAACGGTTGGGAGTGATGGGGTAGCACTGGGAGCAGAG  
CATAGAGGAGTAAGGTTTGGAGAAT

>1197

GGCTGAGATGATCTTTAACCTCCTTCTGGAAGAAAAAAGAATTTTGATCCAGGCTCAG  
AGGGCCCAATTGGTGAGGACAATTCAGTGGAATGTTGGAACTCCTGAAGTAGAGAG  
GAACCATGGAAAGGACTCAGGGAG

>1198

CGAAACACCTGTGGAGAGCCAGCAACATGAGATTGAATCCCGGATCCTGGATTTAAGG  
GCTATGATGGAGGTTAGTAGATGTGGTAGGAGTTAGGGTTGACAGTGTTCAGCCTAAC  
ACCTCCCTGAGAAGCAGCCTCATC

>1199

GTAAAATCCATCAGCCAACTGAAAGACCAGCAGGATGTCTTCTGCTCCGATATAAGAT  
CCAGGCCAAAGGTAGGAAGCACATTGAGGGGCTGGAGAAAGATAAGTGCCTGCTGAG  
AAGCCGGAGCTGGAAGTGAACAGG

>1200

GGACCCCATCAGACCAAAGAGCAGAAGATTCTGCAGGAACTCTCAATGAACTGGA  
CAAAGGAGAAAGGTGGGAGGCAGCAGAACAGAACATGTGGGCAACAAGGACCTGA  
AAAAATGAGGGATGTTGGGAACCCTGG

>1201

GGAAGGCCAGCAGCAAAAAGCCTGCATCAGAGCTCCATTGACCACGGGTTGGAAC  
AGCTGGAGACATGGTGAGAGGTACCACCCCAACCCTCGTCTCGCCATGCGCTGTGAT  
TTGTAAGTTGCAGTGCCTGCATAT

>1202

ACCCTCTGACCAAAGGGGTGGACCTACGCAACGCCAGGTCACAGAGTTGCTACAGC  
GTCTGCTCCACAGGTCTAGAGGCCAGGCAGGAACCCTGGGGAAAGAAGGAACAAG  
GGAAGCCATTCTTACACATACTGAGCT

>1203

CCTGCATGCCCCAACTCCCCATCGACCCCTCATCCTCAAGACTGGCAGCAAGTTCAC  
CGTCCGAACAAGGTTGGCATTCCAGAACTCATTCCCACTTCCTTTTTCCAACCCTGCCA  
CTGTGTATTTCTGGCTTTACAG

>1204

TTCAAACCAGAAAACCTTTGACCCCCGAGAAGGGGCAGAGTCAGGGTTTGATTTGGGA  
CTTTGGTTACCTGGTAAGAATAGTTTGTGACCTATGCTTTTATTACTATTTTATTTTTC  
GAGACGGAGTCTCACTCTGTCC

>1205

GACAGAGGAACTGCACATCATCAGCTTCACGGTCAAATATACCTACCAGGGTCTGAAG  
CAGGAGCTGAAAGTGAGTGAAAATGGAGGGCAAGGAGAGAGAAAGCAGCTTTGGAA  
GAAGGCATAAGAAGGGGATAACAGA

>1206

CAACATGAACCAGCTCTCAATTGCCTGGGCTTCAGTTCTCTGGTTCAATTTGCTCAGCC  
CAAACCTTCAGGTAGGGGAGTGGGGCCGACAGGTCCCGGCGGAGAGCAGGGGTGT  
GGAAGCTTGGTGTGATAGTTGCTT

>1207

CAGTTCTCCTCCTATGTTGGCCGAGGCCTCAACTCAGACCAGCTGAGCATGCTGAGAA  
ACAAGCTGTTCCGGTACAGATTTCTTTTCTCTCAGCCTTTCCCAGCCTTAGTCTTTTCT

GTCCCTCTGCCTATCTATCCC

>1208

CATTCTGGACATGGCTGGACAAAATTCTGGAGTTGGTACATGACCACCTGAAGGATCT  
CTGGAATGATGGGTAAGGCCTTGGTCACCCCTCCCTCATGGGCTTGTGCTCCGGGCTT  
GAGAGTGGAGTCTCTGCACCCTC

>1209

TTTCTACTGCGCTTCAGTGAATCGTCAGAAGGGGGCATTACCTGCTCCTGGGTGGAGC  
ACCAGGATGATGGTAGCTGCTCTGCCCTGCCATTCCCACAGCCTCTCCTTTCTGCCTGG  
CTCTCCTCTGGCCCCTCTGCCTG

>1210

AACCCACTGCGCTTCTCTATCCCCGAATCCCCGGGATGAAGCTTTTGGGTGCTACTA  
CCAGGAGAAAGGTGGGAATCGTTGACATACTTCATTGCTAGATTGCAGAGATCTACCA  
GACATCCATAGATCCCACTCCTT

>1211

GTATCACAGCCAGTGCCAGAGCCAGATTTGCCCTGTGATCTGAGACATTTGAACACTG  
AGCCAATGGAAAGTAAGTGATGAGATGGAGTGGCACACATTCCCTTTCCTACCTCTTCT  
CCCTCTCCATTACAGAAAAAGC

>1212

GGTACCCGTGTATGGCACCCCTGCCATACCAGCTCACCCCTGCCCTGTGACTGCTTGTA  
AGCTAAGGTGGGTATTTCTGGCCACAGATGCAGCATTGACTGTAGTTCTGAGGCTACTA  
GTGAATCCAGAACTGTCTACAG

>1213

AGTGTGAATGTGGACGAAGAAAAGAGATGGTGATTGCTCTGAAGCATCTAGTACTTA  
TCAAAGGTTAGTGTTACTTAAATGTTAACTGATGGCCTAGGTGAAACAGATACATG  
TGTTTTGTTTTGTTTTAAAGCT

>1214

CAGACATGCAGCTTGGAGGTTTCAGTGGAGATCAGCAAGTTAATTACCAAAAAGGAAG  
TTCATCAAGCCAGGTAATTTTTAAATGCATATATGTGCCTTCTTTCTCAATTAGACTTC  
AATTAGAGGGCAGAGATTATTC

>1215

ACCTTGCGAGCCGTCTTCCCAGGCCTGCGTCCGAATCTCCGCCGCTGCGGGCCCGCT  
CCGACGCGGAAGGTGAGGGCTGGGGGAGGGGACCGGCGCTGACGGAGCCGCAGTGC  
GGGGTCGGGTCTGTGGCGGACAGAGA

>1216

TGTCTACTGGTGGAGGCCGTGGTCGTGGAATGAGAAGCCGTGGCAGAGGTGGTTTTA  
CCTCGGATAGAGGTATTTTGTGCAATAGAAAAATTTGAAGTACTTCAGTATTTGTTAGTA  
TCAAGACTGGTCTGACTAGCCG

>1217

CTTCAGATATTTGTTATCGCTGTGGTGAGTCTGGTCATCTTGCCAAGGATTGTGATCTT  
CAGGAGGATGGTAAGTATTTAACTTCCTTTTCATACCCCTCTAGAGCTTGGAGAGGT  
GAGCACATGCAACTGTGTATA

>1218

AGCAGAAATGCTATTCTGTGGAGAATTCGGACACATTCAAAAAGACTGCACCAAAGT  
GAAGTGCTATAGGTAAGGTGCAGAATGTTGTTAGAAGAAAACCTATTGCAGAGATTC  
TTCCAGAGATGAATTAGCTATAAA

>1219

GACACCATGAGGAACAGCGCCTCTGGCCCCGGATGGTACGGCGCCAACCCAGACCCG  
CGCTTCCCCGCCAGTAAGTGAGGCCGCCCACTGCGGGGCGCGGGCTGAGCTCAGG  
AGGTGCGGCGAGAGGCTCCAGAAGGC

>1220

CGCCGAGCTCCAGCCCCGAGCCCTGGACATCTACTCTGCCGTGGATGATGCCTCCAC  
GAGAAGGAGCTGGTCGGTATTCCCCTCGCTCTCGACCCCTTGACGTGTGCCTTGTCT  
CTTCTTTGCACGCCTCCCTCT

>1221

AGAAGTCTTGAAGAAGCTCAAGAGTAAACGTGTTCCCATCTATGAGAAGAAGTATGGC  
CAAGTCCCATGGTAAGGTTTGTGGTCACTCCCTTCCCGTGTTCCTCAAGAGAAAGTA  
CACCGCCTTGAATCGTACACACA

>1222

GAATAAGGCAAGGGGGAGTG TAGAGCAGAGCAGAAGCCTGAGCCAGACGGAGAGCC  
ACCTCCTCTCCAGGTATGTGACTCCCATCCCCCTTCAGAGGCCACACACCCTATG  
GCATTCCACCATGTGTTAAGGATT

>1223

GCAGGAAGTGAACCCAAAGGATCACCTGGTATTCCCTGAGAGTACAGATTTCTCCGGC  
GTGGCCCTCAAGGTTAGTGAGTGAGCAGGTCCACAGGGGCATGATTGGATCCTGGAAT  
GAATGAATCAACCATGAGAGAGTG

>1224

TCTCAATGTCTGCATGAACGCCAAGCACCAAGGAAAAGCCAGGCCCCGAGGACAA  
GTTGCATGAGCAGGTGGGCCAGGGGTGATCTGGGGTGGTGAGGGACTGGCTCAGGA  
AGAGGAAACGAGGACATGGAAATGCC

>1225

CAAACGGCATTTCATCCAGGACACCTGCCTCTACGAGTGCTCCCCAACTGGGGCCC  
TGGATCCAGCAGGTATGCATGGCTTCTCTGCAGGTACAAGACCTAGCGGAGCAGCTGAG  
CTTCCAGGCATCTCTGCAGGCTG

>1226

TGGTGGGAAGATTGTGCGCACCTCCTACACCTGCAAGAGCAACTGGCACAAGGGCTGG  
AACTGGACTTCAGGTGAGGGCTGGGGTGGGCAGGAATGGAGGGATTTGGAAGTGGAG  
GTGTGTGGGTGTGGAACAGGTATGTG

>1227

TCTGCCTGGCAGAGGAGTTTCTTCAGGAAGAACCAGGGCAGCTTCTGCCCTAGAGG  
GCCAATGCCCTTGGTGAGTGACAGTCCCCTGGCCCCAGCCTGGTCCACCTCTGGGAAGA  
GGGTGCCAGTTGTGCAATCCAGGC

>1228

TTGGGGAGACCTGATCTGGCTGTGCCAGATGGACTGAGAAAGAAGTAGAAGACTC  
AGAATTAGAAGAGGTGAGTGGGCTTGGTGGCGGGCTCCCTACCCCACTCCCTGCCCT  
GGGCTGCCTGTGACCACACTGCTTG

>1229

CTCCCTACACCACACCATACTCAGCCCCTGCAGGCAAGGAGAGAACAGGTCAGGTTC  
CCGAGAGCTCAGGTGAGTGACACGTTGGAATGGCCAGGGCACCTTACCCTGCTCA  
GCTTGTGGCTCCAACATTCTAGAAG

>1230

GCACTGGGGCCCCTGCAGAGCTTCCAAGCCCGACCTGATGACCTGCTCATCAACACCT  
ACCCCAAGTCTGGTAAGTGAGGAGGGCCACCCACCCTCTCCAGGCGGCAGTCCCCA

CCTTGGTCAGCAAGGTCGTGCCCTC

>1231

AAGTGTAAACGGGCTCCCATCTACGTACGGGTGCCCTTCCTTGAGGTCAATGATCCAGG  
GGAACCTCAGGTGCATGGCTGGGTCTGGGGTAAGGGAAGTGGAGGAAGACAGG  
GCTGGGGCTTCAGCTCACCAGACCT

>1232

CCCACGGCTCATCAAGTCACACCTGCCCTGGCTCTGCTCCCTCAGACTCTGTTGGATC  
AGAAGGTCAAGGTGAGGCCGGCCTCAATGGTTCACACCTGTCATCCCAGTTTGAGACT  
GAGGAGGGAGGATCCCTTGAAGG

>1233

CGTATGGAAAAGGCGCACCTGAGCCTGGGACCTGGGACAGCTTCCTGGAAAAGTTC  
ATGGCTGGAGAAGGTGGGCTTGACTGGAGGAAGGAGGGTGTGAAGCCGAGGGGTGG  
TGGCTATAACGTACAGCAACCCTGTGT

>1234

CGTGCAGGAGTGGTGGGAGCTGAGCCGCACCCACCCTGTTCTCTACCTTTCTATGAA  
GACATGAAGGAGGTGAGACCGACTGTGATGCTTCCCCCATGTGACACCTGGGGGCA  
GGCACCTCACAGGGACCCACCAAGG

>1235

CCTATGACCAACTACACCACCGTCCCCAGGAGCTCATGGACCACAGCATCTCCCCCTT  
CATGAGGAAAGGTGGGTGCTGGCCAGCACGGGGGTTTGGGGCGGGTGGGAGCAGCA  
GCTGCAGCCTCCCCATAGGCACTTG

>1236

AGAGACAGCATCGTCGGGACCAGACTCGTCTCAGGCCAGTTGCAGCCTTCTCAGCCA  
AACGCCGACCAAGGTACAGCTTCAGTTTGCTACTGGGTTGTGCATTCAGCTGAATTTCA  
TGGGGAAGTCCAAATTCTAAGGAA

>1237

ATACCCAGATGCTGTGGCCACATGGCTAAACCCTGACCCATCTCAGAAGCAGAATCTC  
CTAGCCCCACAGGTATTTTTAAACTTCTCATAATTAACACTACAGTGATGAAAGATAGCC  
ACACTCAGGCCATTTGGGCTGCT

>1238

TGGCCGAGGTGATAGTGTGGTTTATGGACTGAGGTCAAATCTAAGAAGTTTCGCAGA  
CCTGACATCCAGGTAAATCCTTTAACAGACACACCTGATGGTTCTGACTAGCGCTCAAG  
TCTAGGAAACCACAGTTTGCATA

>1239

ATGCACGGGCAAGGCGTGTGCATGGAGCTGGCGGAGATCGAGGCCATCCAGGAAAGC  
CTGCAGCCCTCTGGTAAGGTACCCCTGCCTCCAATTCCCTCCTGAGTAGCGCTCCCTT  
CCCAGCGGCTTCTTCCCCATTCCA

>1240

TCGAGACGGGAGCACCAGTGGGGGCAAGATGAAGGTCAATGGGGCGCCCCGGGAGG  
ATGCCCGCCTGTGGTAAGGACCTCCGATGCACAAATGTGCATGTGCATAGACACACA  
CACACACATGCCCCCTGCCCCCA

>1241

CACCCACGAGGACCTCTACTTCATCCCCATCCCCAACTGCGACCGCAACGGCAACTTC  
CACCCCAAGCAGGTGGGTCTGTCTCCCGCTGGCTTGGCCCTGGACTCAGCTCTGGG  
GCATGGTCTCTTTTCTGCGTCGG

>1242

CACCCATTGCCCTTCATTGGAAACTACCTGCAGCTGAACACAGAGCAGATGTACAAC  
TCCCTCATGAAGGTGTCCCAAGACAGGGAGATGGGTGTCTCGGGGTGGGGGCTGCCTA  
GTTGGCTGGGGCTTTGTGGCAGGG

>1243

GTGGACCAGGCTGAGGAGTTCAGCGGGCGAGGCGAGCAAGCCACCTTCGACTGGGTC  
TTCAAAGGCTATGGTGCCCAAGAGGGGGAAGGTGGGCAGGTGGACACGAAGGTCTCA  
GTGTTCCAGCCTTCTCCCTGACTCT

>1244

AAGCGAGGCATCGAGGAGCGCATCCAGGAGGAGTCGGGCTTCCTCATCGAGGCCATC  
CGGAGCACGCACGGTGAGCAGGGGACCCCGAGTGCGGGGCAGGAGAAGGAAAACA  
CCCAGGACGAGGAACCCGCGCGCTTC

>1245

CAAAGAGTTCCTGTCACTGTTGCGCATGATGCTAGGAATCTTCCAGTTCACGTCAACCT  
CCACGGGGCAGGTAATGGTTGACGCCCGGCCGTGAAGGCCCTTACCAAAACCGGCA  
AATTGTTCCCTACCGGGGGAAGG

>1246

CAACCAGCGCACGCTGGATCCCAATTCCCCACGGGACTTCATTGACTCCTTTCTCATCC  
GCATGCAGGAGGTACACCCAGCAGCCACTGCGGGGAGATGCAAAGCCAGGCAGAGG  
GAAATCAGTCTGGGAGTGGGGCAG

>1247

GGCACCGAGACGGTCAGCACCACCCTGCACTATGGCTTCTTACTGCTCATGAAGCACC  
CAGAGGTGGAGGGTAAGGCTGGAGGGGACGGAAGTGGAGGGCCCCAGACCCTCAA  
AATCCCCTTCGACTGGTGCAATGTC

>1248

CGTGATCCCATGAGTTTGGCCCGCAGAGTCAAAAAGGACACCAAGTTTCGGGATTC  
TTCTCCCTAAGGTGCTATCCGCCCCACCCCCAGACTACGGGGACTCCAGCCCCTCT  
CTGTGTCCCAGCATCCCACCCA

>1249

AATCCCAGCACTTCTGGGTGAGAAGGGCAGTTTAAGAAGCGTGATGCTTTTGTGC  
CCTTCTCCATCAGTAAGAGACCACTGTTTGGTGCCAGGCTTACTACTCACACCAGCAG  
GGGCCTCCCTTACCCAGTCCCCT

>1250

CACCCATTGCCCTTCATTGGAAACTACCTCCAGCTGAACACAGAGCAGATGTACAAC  
TCCCTCATGAAGGTGTCTAAGGCAGGAGATGGGTGGCACGGGGTGGGGGCTGCCCA  
GTTGGCTGGGGCTTAGTGGCAGGGG

>1251

GTGGACCAGGCTGAGGAGTTCAGCGGGCGAGGCGAGCAGGCCACCTTCGACTGGCTC  
TTCAAAGGCTATGGTGAGGGGGTGCCAAGAGGGGGAAGGTGGTCAGGTGGATGCAAT  
GGTCTCCGTGTCCCAGCCTTCTCCC

>1252

AAGCGCGGCATCGAGGAACGCATCCAGGAGGAGGCGGGCTTCCTCATCGACGCCCTC  
CGGGGCACGCACGGTGAGTAGGGGACCCCGAGTGCAGGGCGGGAACCCGCGCTTC  
TGCCTGGGGATGGGGACTAGGTGGGG

>1253

CAAAGAGTTCCTGTCACTGTTGCGCATGATGCTGGGAAGGTTCAGTTCACGGGAACC  
TCCACGGGGCAGGTAAGTGGATGCAGCCCGCCAGTGACGCCCTACCACAACCTGCC

AACTGCTCCCCTACCTGGAGACAGG

>1254

CAACCAGCGCACGCTGGATCCCAATTCCCCACGGGACTTCATCGACTCCTTTCTCATCC  
GCATGCAGGAGGTACATCCCAGCAGCCAGTGCAGGCAGGTGCAAAGCCAGGGAGAGG  
GAAATCAGGATGGGAGTGGGGTGG

>1255

GGCACTGAGACCGTGAGCACCACCCTGCGCTACGGTTTCCTGCTGCTCATGAAGCACC  
CAGAGGTGGAGGGTAAGACTGGAAAGGGAGGAAAGTGAAGGGCCCCAGACCCTCAA  
AACTCCCCTGAGCCTGGTGCAGTGTA

>1256

CATGCTCCCCATGGGTTTGGCCACAGGGTCAACAAGGACACCAAGTTTCGGGATTTT  
TTCCTCCCTAAGGTGCTGTCTCCCCTCCACCACCACCACTCAGACTACGGGGACTTCC  
AGCCTCTCTGTGTCCCCAGAAT

>1257

AGTCCCCAGCACTTCTGGATGAGAAGGGGCAGTTTAAGAAGAGTGATGCTTTTGTGC  
CCTTTTCCATCGGTAAGAGACTGTTTGTGCCAGGCCACGGCTCACACCAGCAGGG  
GCCTCTCTACCCACCTCCCCTCT

>1258

CACGCCGAAGTGCATGCCGAGCCCCGGGGTGATGACTGGAGGGTCAGCCTGGAAGAC  
CACAGCAGCCAAGGTGAGCATTAAAGCAGGGCAGCTTGGCCCTGGGTGGTTGAAGCG  
CCAGGCTGGAATGAGTAAGGTCTCCA

>1259

ACCCGCCACCGTCTTATGGAGCCCAGGAAGAAACTCCGTGTAGACAAAGCCCCAC  
TGACTCCCCTGGGTAAGTGGAGTCTCACTTGGCCCTCTCAGTGTTTTACTGCTTTTC  
GATTCCTTGATCCCTAGGCTGTG

>1260

GCTGCAGTTGGAGCCGCCACCGTGGTGGAGACCCTGCGGCGCGGGAGTAAGTTCAT  
CAAATGGGACGAGGTAAGCGCGGGGCCCTGCTCCGCCAAATCCCGGGACTCTTTC  
AGTCAAGCTCGACCAGACGCTGGGG

>1261

CAGTCGGAACCTGGTGACCCTGCGTGTGGACCCCAATGGCTTCTTGTACTGGACG  
GGCCCCAACATGGTGAGGGTGGGCGCTGGTGCAGCTCGCTCAGGCCAAGGACCCCTG  
TCCAGACCCCTGCCCTGCCCGTGG

>1262

GGTGTCTGGGCCAGACCCGGTGAACACAGTGTCTTGAACCTCATGGCCGTGCAGGAT  
GACACAGCCAAGGTGGGCTGGCACCAAGGGGACGAAGGGGGAGTCACTGTCTTATTC  
TGTGAGTCGGCCGTCCTTACCGAA

>1263

AGGAGCTATTCAAGCTGGCTATGAACATCCTGGCTCAGAACGCCTCCCGAACACCTT  
CCTGCGCAAAGCGTGAGCCCCAGGCCACCCGAGGGGGAGCCGGGGGGTTACGTGG  
CCGTTTTTCAGGGTGTGACCTCTTCAT

>1264

GAAGATGTTCTCAGCAGACAAGAAGCGGGTGGAGACTGCGCTGGAATCCTGTGGCCT  
CAAATTCAACCGGGTGTGTGGGGTGGGGACAGGGGCGGGGTGTGGTGTGTACGGTG  
GACACCCACCTTACGGGGGTGCCCG

>1265

TGAAATCTTTGAGCGTTCTGAACAAGCTGTGTCTGCGCCGGACATTGACAAGAT  
CCTGCTGGAGATGTGAGTGGGCCCGCCTGCCTACAACCCCTGTGCTCTGTGTTAG  
CTTCTGCTTAGCGTGCCTCTAGCT

>1266

CCCCTGCGGCCCTCCAGGCCCGGCTGCTCATCGAAAAGTATGAGCCCAACCAGCAGT  
TTCTGGAGCGAGGTGAGCTGGCTGGGGTGCAGGTGGGTGGGGCAGGTGGGACACC  
AGCTGACCCTGCTGATCCTCTCCAC

>1267

CTGAGCACGGACATGACCCAGCCACTGAGTGCCTACTTCATCAACTCCTCGCATAACA  
CCTATCTCACTGGTGTGAGTGGGGAGCAAGGGTGGCACCCGTGACCTCTGCCCTGTGACC  
CTTGACAGCCCCACTCCTCTGG

>1268

CCATTGCCGAGACTGCCTTCAAGACCTCGCCCTACCCCGTCATCCTCTCCTTCGAGAAC  
CATGTGGACTCGTGTGAGTGGCCCTGGCATGAAACCCATGGACTGGGGGACAGTCTT  
CCAGCTTCAGTGCTGTTGGACTG

>1269

AAAGATGGCTGAGTACTGCCGCTCCATCTTTGGAGACGCGTACTCATCGAGCCTCTG  
GACAAGTACCCGTACGGGAGCTCGGAGCGAGGGGGTGGCATGGGGGCCAGGGTG  
CTGCGGACCCGGTCCAGGGCCCTGAC

>1270

CCCCTGGAGCAGAGCAATTCTGCCCTGAGCGAGAGCTCCGCGGCCACCGAGCCCTCC  
TCCCCGAGCTGGGTAGGCCCCAGCCCGGCCACCCTGATCGACCCTAGCCTCTG  
GCCTCATGTTCCAGGCGCCGTGACA

>1271

CCGTGAGGATGAGGAGGAAGATGAGGAAGAGGAGGAACAGACAGACCCCAAAAAGC  
CAACTACAGATGAGGTCAGGCCACAGGGTGGGCAGGTCGGGGAGGTAGCATCTATTT  
ACCTCCCAGGGGGCTGGGTCTAACCA

>1272

ACTGAGGAGATGTCCACGCTTGTCAACTACATCGAACCTGTCAAGTTCAAGTCCTTTG  
AGGCTGCTCGAAGTGTGAGTGGGGTGGGTGGCAGGCATGGGAGCTTGCCAGCTCAGC  
CCTGCCAGGTCTGACGCCCTTTCTT

>1273

TCGAGATGTCGTCCTTTGTGGAGACCAAGGCCATGGAGCAACTGACCAAGAGCCCAT  
GGAGTTTGTGGAGTATCCTTTGAAGGTGCTGTGGGCGGACAGGCCAGGGTGGGGCGC  
TCGGAGGCCGGCTCCGGTGTCTAT

>1274

TCCAACATGCCCCAGCTCTTCTGGAACGTAGGGTGCCAGCTTGTGCGCTCAACTT  
CCAGACCCTCGGTGAGCCCTGGCCCCCTCCATCTTGACCCCGACCCTCAGTCTTACTG  
ACTTCTGACCCACGATCCTGCTG

>1275

GGACAAGTCTTCGACCCCTTCACTGAGGTCATCGTGGATGGCATCGTGGCCAATGCC  
TTGCGGGTCAAGTGGGGCTTGCGGGCGGCTCAGGCCAGGGGTGCTCTGGGGCAGG  
ACTCTCAGCATCCGCCTCACCTCC

>1276

CCGCACCCGACCTCTCAGGGGAACTCGTTCAACCCCGTGTGGGACGAAGAGCCCTT  
CGACTTCCCAAGGTGAGCCTGGCCCCTGCACCCGCCAGGCACAGGCAGATCCAGC



CCAGACCGCCCCGACTCTCAGGTGGG

>1277

ATTGCAGCCTTTGAGGAGGGGGTAAATTCGTAGGGCACCGGATCCTGCCTGTCTCTG  
CCATCCGCTCCGGTGAGGCCTTGGTGGGCTCTGGGCAGCACAGCGGGCAGTGGGTAG  
GGCCCCACCTGGCCAGCAACCCA

>1278

CAACCGCTGTGCCTGCCGGCCCTGCTCATCTACACCGAAGCCTCGGACTACATTCTG  
ACGACCACCAGGGTGAGCTGGGGGTGGGCGGGCCCTGCCTGGCCAGGGAGTGTGAG  
GGACAAGGGCCACCCCCAGGGCCTGG

>1279

CCCCATTAAGCACGTCAGCCTGATGGACCAGAGGGCCCGCAGCTGGCCGCCCTCATT  
GGGGAGAGTGAGGTGAGCCGGGGCAGGGCAGGGCTCAGGCTCACTGTGACCCAGGG  
GGCCGCTGGACATGACTGCTGTGGCC

>1280

CTGGATGCCTCCCCCGCCGGCCCCCTGGCCCCACCACCTCCCCTGCCAGCACCTCCC  
TCAGCAGCCCAGGTAAGGAGTGGCCTGGGTCTGGGGGTGGGTTGCAGGGAGGCACCCC  
CCACCCTGTCCTCCAGCTCCTCACA

>1281

CCCGCCGCTGCTGGATGGCCTGGCTCAGGCACAGGCTGAGGGCAGGTGCCGGCTGC  
GGCCAGGTGCCCTGTGAGTGTCTGGGCCGCTGTGTGCTATGTGTGCTGGGTGTGCTG  
ATGTGAACATGGGGGTCTGGTGGCA

>1282

GAGCCTGCTGGAGCTGCGGGAGGCCAGGTGGACGCAGAGGCCAGCGGAGGCTGG  
AACACCTGAGACAGGTAGGGGGCTGCAGTGGCCAGGGAAAGCCTGCTGGATAGACC  
CGTCGTCAGCCCGCATCACCTGTGAG

>1283

AGCGGCTCAGGGAGGTCGTCCTTGATGCAAACACAACCTCAGTTCAAGAGGCTGAAAG  
AGATGAACGAGAGGTGAAAGCCGAGGATTGTCTATGGGAAGGGCTGGGGACTTCTAG  
TACCAGAAGGAGGGCAGAGTCTGTG

>1284

AGATCCTGGACAGAAAGCGCCATAACAGCATCTCGGAGGCCAAGATGAGGGACAAGC  
ATAAGAAGGAGGCGTAAGGGCACCGGGACCGGGGCCATCTGGGTACTGGGGAGGCA  
GGGCAGGTGTCTGGGCCCGAGCCAT

>1285

GCAGCGCATGACCGTCTTGTGGCTGGGCAGCAGCAGGTCCTGCAACAGCTGGCAGA  
AGAGGAGCCCAAGGTGAGGCCATGGGCGAACAGGTGGGCAGACGGTGTGCAAGGCA  
GCCAGGCCTCGCCTGTGATGCCATCC

>1286

AAGCCGCACGGCCCTGCCCCACAGGCCCTACAGCCTCCACAGCCACTAAGCCTGCA  
CCCCAAGTGAAGGTGACTGAAGGTGGGGCAGGGGGAGGAGGGAGGCAGGCATGTC  
AGGGGTGGAGGGGAGCTCTTGCCATG

>1287

TGGGAGCCCCAGAGAGGCTGGGGAGGCTGGGCCTCCAGGGCTATGTGCTGGAGCTC  
TGCAGAGAGGGAGGTGAGTCGTCTGGGCTAAGTCTTGCATACATCCAGGGGAGGTTGT  
CATGGAGGGCTGCAGGGACAAGTGC

>1288

GCAGTTCGTCTGCAGGGGCTGGCCCGCCGCCATGCTGGACCAGCCCATCCACATCC  
GAGAGAACATTGGTAAAGCCCATCTGGCCTTCAGCTACCCAGCCCTTCCCAAACACC  
TTATCTAATGGAGAACTGAGGCC

>1289

CCCCCGCCACCTCCGTCAGACCTACATCCGCCAGGTGGGAGAGACGGTCAACCTGCA  
AATCCCCTTCCAGGTGGGTATTACCCCCACCAAGGGTAACAGCCTGGGTGGGAACCAG  
GGCCCCATTAAAGGGGAGCCTGGG

>1290

GGCCGCTACGAGCTCACTGTGCGCGTGGAAGACCTGGAGGCCAAGGCAGTCATTGAC  
ATCCTGGTGATTGGTATGGAGCCAGGGGAACAGTGCTGTCTCATGGGGGACCTGGAGC  
CCCCAACCTCCTATCCCAGAGCTGA

>1291

GCCACCCAGGACACAGGCAACACAGAGCTCCTGGGCTACATGGTGCAGAAGGCAGA  
CAAAAAGACAGGGGTGAGGCTGGCTGAGGCAAAGTGGGGTCTGGGGTACGAAGTGGT  
CAAGGTGGTGGGGAAGGCCATCCCAC

>1292

TCAGAAAACCTGTGTGGACTCAGCACCTCGGCCACCGTCACCAAGGAGCTCGCCCAC  
ATCCAGAAGGCAGGTGGGTTTGGGCCCGGAGCTGGCTGTGTAACCTCTCCCTGTCT  
CTGCTTCTTCCCGCTCTCTGCA

>1293

CCTGGCTGACCACACCTCCACCCCTGGCTACAGCACCCAGTTGTTCTGCAGTGTCCGA  
GCTTACCCAAGGTGAGGGGCCAGGCCCTGTTGTGCCCTGGGCTGGTGGGGCAGGT  
GGGGACAGCAGGGCTGAGGAATCCT

>1294

GGGGTCTACACCTGCAAGGCCATAAATGTGCTGGGGGAGGCATCTGTGGACTGCCGGC  
TGAGAGTCAAAGGTGAGAGTTTGGAGACGGGAGAACAGGAGTAAGCACCTCTCTGGA  
ACTGGACTAGAGGCAGCAGACAGCT

>1295

GGCCTTGGCAGGAGGATGTGGCAGATGCTGAAGAGTGTGCTGGTCTGCTGTGGGCTCTT  
AATGGACTGCTGGTGAGTGCCACTGGGCCTAGATAAGACTGGGGCAGGGGAGCCT  
GGGCCGTGGCGTTACCCTGTGCCTT

>1296

ACACCATGGCCACGACCGTGGGTGGCCTGTCCTGCCAGGCTTGAGCCACAAGTTCCC  
GAATGATCACCAGTGAGACAAACACCTTCCCTCCATCCCGCCTGGGACCTTCCCCCA  
GCACACACTATAGTGATGCTCTGG

>1297

GGTCCTTGGTGCCACACAACAGACCCTGCCGTGCGCTTCCAGAGCTGCGGCATCAAAT  
CCTGCCTGGTGGGTAAGCGGCGCCGGTCAAGCTGGGAGAGTGGAGGGACAAGCCCA  
CGCCCATCCACGAACCCACTGGCTC

>1298

CCGAGTCAGGGCGCGAGTGCCAGCGCTGGGATCTCAGCACCCGCACCAGCACCCCT  
TCGAGCCGGGCAAGTACGCGTAGGCGGTATCGGCGCCTGGGGGCCGGGCTAGGGAA  
GGTCCAGGACTCCAGGGGCAGGGCTC

>1299

TCCAGCGGCCATGGTGCTACACTACGGATCCGCAGATCGAGCGAGAGTTCTGTGACC  
TCCCCGCTGCGGTAGGCGGCGGGGACCAGGCCTGGGAGGGTACCTGGGAACCTTGG

GGAGGGGCGTGGCTTGGCCGGGAGG

>1300

TACCTTGCCAGCGTTGGGACGCGCAAATCCCGCATCAGCACCGATTTACGCCAGAAAA  
ATACCGGTGCAAGTGAGGTGGGGGGGCGGGCGTTGGGACGTGCTGCTGCGGGTGAGA  
CGGGAGGAGGGTAGTCACAGGCTTA

>1301

CTGCGGCCCCGGCACGCGCGTGGGCTTTTGCTACCAGATCCGGCGTTGTACAGACGACG  
TGCGGCCCCAGGGTGAGGCCAAGCTTGGGGGCTACAGAGCCGGGGCTGGAAGCCTG  
GAACCGAAGGGCCGGGGCGAGGTCT

>1302

GCACGGTCAGCAAGACCCGCAAGGGTGTCCAGTGCCAGCGCTGGTCCGCTGAGACGC  
CGCACAAGCCGACGTGAGTCCCTGGTGCTCCCGCCCCGCCAGGGCCCTAACCTGG  
GGCGGCATGCTTTGATGTCTGGGACC

>1303

AGCCATGGGCCCTGGTGCTACACGATGGACCCAAGGACCCCATTCGACTACTGTGCC  
TGCGACGCTGCGGTGAGCACTAGTGACGCTTGCCCCATGACCCTGCCTCAGCCCCAC  
CACCAAAGGCTGGCTCCCTTAACC

>1304

GTCGTTCCAAGCTGCGCGTGGCTGGGGGCCATCCGGGCAACTCACCTGGACAGTCA  
GCTTGGGGAATCGGTGAGGCACAACCTGCCTGTCTCCACAGAGAGGAGCTGAGGTTG  
TGTCTCTGTGGTTATGCCACTGGGG

>1305

AGCATTCTGCGGGGGTCTCTAGTGAAGGAGCAGTGGATACTGACTGCCCGGCAGTG  
CTTCTCCTCCTGGTGAGCCTCCCTTGTGTTGGGACCCAGTCTCATCCACCTTCCCT  
TTCCCAGGCAAGCTAACAAGTG

>1306

AGCGGGTCCCAGTAGCCAAGATGCTGTGTGGGCCCTCAGGCTCCCAGCTTGCCTGCT  
CAAGCTGGAGAGGTATGTGACAACCTGGGAGGGTGTGAGGTGGGGCTGAGCCTTGT  
GGCCTCAGACCCTGAGTGCCCCCAT

>1307

CTGCCGCTGAATGATATGTGGTGCCTCCAGGGACCAAGTGTGAGATTGCAGGCTGGG  
GTGAGACCAAAGGTAAGAGCATAGTGCACAGGACTGTGGCGGCCAGGAGCCCAGCC  
CTGGATCTTCTCCAGGACCGTCTC

>1308

GCACCGAGGACATGTGCGGGAGAGCGAGATGTGCACTGAGGGACTGTTGGCCCCTGT  
GGGGGCTGTGAGGTTGGTAGCAGGGCCCTGGGCCAGCCCTGGAAGGGTATGGGGGG  
CTAGAAATGAACTATTTTATCATGAA

>1309

GCCTGTCTCCGAGCCAGTCGCTGACAGCCGCGGCGCCGCGAGCTTCTCCTCCTCA  
CGACCGAGGCAGGTAAACGCCCGGGGTGGGAGGAACGCGGGCGGGGGCAGGGGAGC  
CGCGGGGGCCGAGTGAGGACCCCGG

>1310

ATTCAGCCATGTCTGAGCTTCCGTCTTCTGGAGGCACAAATCTAGTTTAGCTGAAC  
CACAACAGATTGTACATATCCTGCAGAACCTCTGTGGTCTTAGGAAGGTTGAAAGTCA  
CCAAATGTCACAGAAAATGAGGG

>1311

CTGCTGCCATCCTCCAGCAAGATGCTAGGGTCTTTGGGGCTTTGGGCATTACTCCCAC  
AGCTGTGGAAGGTAAGTGTCTACAGGGAGGGGAAGGGTCTCTCCATCCATCCAGCAA  
GGGAAAGGGGCGCTTGAAGCAAGA

>1312

TGCCTCTACAGCCGCTGCTGCTTTGGGATCTGGAACCTGACCCAAGACCGGGCACAGG  
TGAAATGCAAGGTGAATGGCAAAGTATATGGCAGGTGATGGCTAGGGTGGGAGACA  
GACACATCCTGGGGTGTGGGTGGCA

>1313

AATTACAGCCATCTGCCTCCTCCAGGGAGCCCTGGGACTCCTGGCTCCCAGGGTCCCC  
AGGCTGCCCCAGGTAGCCACCCAAGGGTACTGAAGCCTGATGGGGCTGGGGCCCAG  
GTTAGGATGAGAGGTGGAACCAGGG

>1314

ATCTGGATGGCACTGGTGTGCTGGGGCTGTTCCCTCCTCCTGCTGCTGCTGGGCAG  
CATCATCTTGGGTAATCCACCCCATCCCTCCCTGTGACCCCAAGACATTGCCCA  
AAAGCTCTGACCCCTCTCCAGG

>1315

GCCAAGGCCAGACTCAGGCAGGGACTGGAGTGTGGAGCTGCAGGAGCTGCCTGAGCT  
GTGTTTCTCCAGGTGCCCCAGGGAGGGAGAGAAGGGCTCCTCTGGGCACTCCTGGA  
GGTTGTGCTGGGGAGGAATCCTGGCC

>1316

CACTGCCAGCCGGGGGGTCTGGCCGCCTGCTCTCTGGGCCCTGCTGGTACTGGAA  
CTGCATCCCAAGGTGAGACCAAGGAGTGTATATGTGTGTGTGTGCCTGTGTGTATG  
TATAGAGGTGGGGGCTACATGGC

>1317

AGTCCCTGCGGATGGCACTGTCCCTGGCCCAGGGCCTGGCATTCTCCATGAGGAGC  
GCTGGCAGAATGGTGGGTGAGCTGGGCATAGGAAGTCAAGGGAGCCACAGTGCTATG  
TTTGTGATTCTGCCTTAGTTGGAG

>1318

GCTCCCTGGCCTCACTCAGCCCCCTGCCTGGACCCCTACTCAACCACAAGGCCAGCT  
GCCATCATGGAAGTGAGTTCTCTGGATAACTGGTGAGGCCAGGATGATGTTGGTGCT  
GCTGATGGCAATGCAGCCATTGTG

>1319

CGAGCTGATATTTACTCTTTGGCTCTGCTCCTGTGGGAGATACTGAGCCGCTGCCAGA  
TTTGAGGCCTGGTAAGGATGGGTGGTACAGTCCCCTCCTGGGCTCCCCCGCCCAT  
TCTAGGTTACCCCAACCTGAC

>1320

GCTATGGGCCTTGGCAGTGCAGGAGAGGAGGCGTCCCTACATCCCATCCACCTGGCGC  
TGCTTTGCCACAGTAAGAGGCCTAGGCTGTTGGTCTGGGAACCTGGAGAGTGGGGGC  
TGGGCATGGGCTTCAAGGACGTCTC

>1321

ACCTTAGCCTACAGGGGCTGGAGACCGTTCCCGGGAGGTGGTCAGCCATGTAATC  
AAACAAGGGAAGGTGAGTCAACACCCCAAGGACAGACCCCAACCCCTGCCTGGCCAA  
CATGGTGAAACCCCATCTCTATTAA

>1322

CAAAATCATGCGGGAGCCCTGGGTAGAGCAAGACAAGTTTGGGAAGGTGAAGTTTGC  
TGTGCTGCAGACGGTGAGTTCCCTTTGGTGCCCCACCCCTCCTGCTGTGGCACCAC

TGAGATGTCAGGAGCCCCGAGATG

>1323

TGAACTACATCGGCCAATTCTTGCTGGATATGAGCCCCAGCGTTCATGGACCCCTA  
CTTCTAAACTGTGAGTGTCCCTCAGGGCAGAGGTGGGTGGAAACCCCTGAGGGACT  
GTGAAAAGTAATGCCCTTCCTCC

>1324

GCAGTCTGGAGATGATCGACCACATTGTGGGAAACCAGCCTGATCAGGAGATGGTGTG  
CGCTCCGAATGGTGAGACCTTGCCCTCTCCCTCTGCGTGAAGATGACGGGTCTCA  
CGGTGGACTGGCCCACTCCCTGGT

>1325

CAACTATGAAGAGTCCATCAAGATGCCATCAATGAGCCAGCGCCTGGCAAGAAGAAG  
TCCAGATCCAGGTGAGGCCGCCCTGGCTGGGGGAGAGGGGAGCAGGGAAGAGGT  
CTGGGGGCTCTGTAGGGTCAGGGAT

>1326

ATATGTGGACTATAACGGGGGCGCTGGGGTCCAGCACATCGCTCTCAAGACCGAAGAC  
ATCATCACAGCGGTTAGAACCCCTTCCTGTCCGAATTCCTCTCTCATTTCAGAGCCAG  
GGACGGTCTCTGCAAAATTGAGA

>1327

CTACAAACAACGCGGGAGAAGCTGAAGACGGCCAAGATCAAGGTGAAGGAGAACA  
TTGATGCCCTGGAGGTGAGGCCAGGCAGGATCCGCAGCCTTGTGGGGGAGTATGA  
GCTCTGCATTGCATCTTTTCAGAAATA

>1328

GATCTTACCAAACCGGTGCAGGACCGGCCACGCTCTCCTGGAAGTCATCCAGCGC  
CACAACCACCAGGTACTGCTTGTCCCGGCAGGCCGAGGGGACAGGCAGCTAGCAC  
ACTCGGTTTTCTGGGTCCTTGCTC

>1329

TGGCTGGAGCCCCCTCAGTGTGCAGGCTTAGAGGGACTAGGCTGGGTGTGGAGCTGC  
AGCGTATCCACAGGTAAAGCAGCTCCCTGGCTGCTCTGATGCCAGGGACGGCGGGAG  
AGGCTCCCCTGGGCTGGGGGGACAGG

>1330

GCTACTCCTCTGCATTGGAGCCCTCTCGGGCACAGCAGCTGCCAGAACCCTGCCAGC  
CCCCGGAGGAGGTCAGTAGGCAGGCGGGGAGGGCGTGGTCAGCATTCCCCGCCCT  
CCTTGGCAGGCAGCACGGGAAACAG

>1331

ATGAGCCCCACGACCAACGTGCTCCTGTCTCCTCTCAGTGTGGCCACGGCCCTCTCGG  
CCCTCTCGCTGGGTGAGTGCTCAGATGCAGGAAGCCCCAGGCAGACCTGGAGAGGCC  
CCCTGTGGCCTCTGCGTAAACGTGG

>1332

GAGCTCCTTGACACGGTCACTGCCCCCAGAAGAACCTCAAGAGTGCCTCCCGGATC  
GTCTTTGAGAAGAGTGAGTCGCCTTTGCAGCCCAAGTTGCCTGAGGCATGTGGGCTCC  
ATGCTGCAGGCTGGGGGGTCTTTT

>1333

CTCGCCAGGTCCACAAAGGAAATTCGGATGAGATCAGCATTCTCCTTCTCGGTGTGG  
CGCACTTCAAGGGTGAGCGCTCCAATTCTTTTCAATTTACTGTATTTAACT  
AATTAATTAATTCGATGGAGTC

>1334

GAGGGTCCCATGATGTCGGACCCTAAGGCTGTTTTACGCTATGGCTTGGATTGAGATC  
TCAGCTGCAAGGTCTGTGGGGATAGGGGCAGGGTGGGGGGTGGATGGAGGGAGAGGA  
TAGAGAAGCAAAACAGGGTAGTGG

>1335

GCGGTCTCACTGTCCCAAGCTGAAGCTGAGTTACGAAGGCGAAGTCACCAAGTCC  
CTGCAGGAGATGAGTATGTCTGAAGACCCTTTCGCTCTTGGTGGGTGGATGGGGTGGG  
GCAGGGTCTTTGGGCCTTCCACTGT

>1336

CCCTGTGCCTCCCTCTACAGCCCTCAGGGAGCTCATTGAGGAGCTGGTCAACATCACC  
CAGAACCAGAAGGTGAGTGTCTGGCTAGCCAGGGTCTAGCTATGAGGGCTCCAGGGT  
GGGTGATTCCAAGATGAGGTCATG

>1337

AGGCTGCAGTGCCATCGAGAAGACCCAGAGGATGCTGAGCGGATTCTGCCCCACAAA  
GGTCTCAGCTGGGGTAAGGCATCCCCACCCTCTCACACCCACCCTGCACCCCTCCT  
GCCAACCTGGGCTCGCTGAAGGGA

>1338

GTCCTGGTGGCCGTGGCTACAGCCCTGGTGTCTGCCTCCTCCCCCTGCCCCAGGCCT  
GGGGCCCCCAGGTGAGAAGAACCCTGCTCTACAACTCCCAACTTGACTTGTGACT  
TGCCACCCTCACTGTGGCCCCCTT

>1339

GATGAGGGCACCTACATCTGCCAGACCCTGGATGGTGCCTTGGGGGCACAGTGACCC  
TGCAGCTGGGCTGTGAGTTGGGGAGGGTGGCACTGATGACACATAGGGATCCTGAGG  
GAGTATGGGACCTAAGTAAGCCCTC

>1340

AGAATTCTCTTGCACTTGGAGTCCCAGCCAGATCAGCGGTTTACCCACCCGCTACCT  
CACCTCTACAGGTGTGTGTGATTGGGTGTGGATGCCTACACATTGGGTATGCTGG  
TGCAATGTGGGTGTGGGAGGCAG

>1341

ATTAATGTGACTGAGGTGAACCCACTGGGTGCCAGCACACGCCTGCTGGATGTGAGCT  
TGCAGAGCATCTGTGAGTACCCACCCAGACCTCCCCAGACCCCATCACAGAGACC  
CCAAATGGACTCAGATCTCTCCAC

>1342

GTGCCAGCCCCACTTCTGCTCAAGTTCGTTTGCAGTACCGTCCGGCGCAGCATCCA  
GCCTGGTCCACGGTGAGGCCTGGAGTGCCTCCAACCCACGGCTGTGGTCTGTCTCT  
GATTCACGATCCTGGGTGTTCTG

>1343

GCCCCGGACTTTCTAGATGCTGGCACCTGGAGCACCTGGAGCCCGGAGGCCTGGGGA  
ACTCCGAGCACTGGTGAGAGACAAAGCCAAAGAAAAGGGCAGAGGCCCATCCCAA  
AGCATCTATCAGCTGAACCAGTTCCAA

>1344

GAGGTGGAGCCTCAGGTGGACAGCCCTGCTCCTCCAAGGCCCTCCCTCCAACCACAC  
CCTCGGCTACTTGGTGTGACTTGGGCAGATGGGCAAGACTTGTAAGGACTGAAAACC  
CCAGAGAAAAGGGGACACCGAGCTTG

>1345

CGGGGTGGGAAGGATGGATCCCCAAAGCCTGGGTTCTTGGCCTCAGTGATTCCAGTGG  
ACAGGCGTCCAGGTGAGTAGGACATCCAGAAGATTTGGACTTGGAGATGTTGCCCT

ATTTTGAGTGTCCAGATTAAGAGC

>1346

GTCCTGGGGCCTGGGCAGCTGGGGGCTGTGGCCATTCTGCTCTATCTTGGATTACTCCG  
GTCGGGGACAGGTAAGTGAGGACGTGGGGGACAGGTGGGGACAATGCACTGGAGGG  
AGCCGGCGTGATCATTTTCTGGGGT

>1347

GCGTCCATGTGTGTGGTGGCTCTCTCGTGTCTGAGCAGTGGGTGCTGTCAGCTGCTCA  
CTGCTTCCCCAGGTACCAAATGGTAAAAGTCAAAGTGGGCTGGAGGTCAAAGTTAAT  
GGGTCAATCCAGGTCAGAGGTTGG

>1348

GCAGCCAACGCCTCCTTCCCCAACGGCCTCCACTGCACTGTCACTGGCTGGGGTCATG  
TGGCCCCCTCAGGTGAGGTGGGACGTGGGTGCCTAGAGGTGTGGAGGGGCACCTGAC  
TTGGGGAGGGGCCAGGGTAAGCCT

>1349

GGAGCCGCACTTTGTCCAAGAGGACATGGTGTGTGCTGGCTATGTGGAGGGGGCAA  
GGACGCCTGCCAGGTAAGCACAGGCCCGGGGCAGATGACCAGTGCAACTTCGAAA  
GGAGGCCTGGCCCGTCTGATGGCT

>1350

GCGCCAGCAAGTTCGCGCTCGAAGGCTTATGCGAGAGTCTGGCGGTTCTGCTGCTGCC  
CTTTGGGGTCCAGTGAGTCAACACCCCCGTTCCCCGAACCCTCTTA ACTCTGACCTAG  
AGACGCCGAGCACCTGTCCTGCG

>1351

CTACCAATACCTCGCCACAGCAAGCAAGTCTTTCGCGAGGCGGCGCAGAACCCTGA  
GGAGGTGGCGGAGGTGAGCGCCGGGCTGGACTCCAGGAGTGGGGGCGGTGCGTCTCT  
CCGGCGCGCAGCGGTGGCCACAGCTCT

>1352

CAGCCTCCAGCCAGAAGGATGGGGTGGCTCCCACTCCTGCTGCTTCTGACTCAATGCT  
TAGGGGTCCCTGGTAAGTGCCCCAACCTGATCCCATCTGCCTTCAGGAGGGGGTT  
GGCCCCATTCTCTATTCTAGGAT

>1353

GGCCTTGGCAGGAGGATGTGGCAGATGCTGAAGAGTGTGCTGGTCGCTGTGGGCCCTT  
AATGGACTGCCGGTGAGTGGCCACTGGGCTAGATAAGACTGGGGGCAGGGAAGCCTG  
GGCTGTGGCGTTACCCTGTGCCTTC

>1354

GCACCATGGCCACGACCGTGGGTGGCCTGCCCTGCCAGGCTTGAGCCACAAGTTCC  
CGAATGATCACAAGTGAGACAAAACCTTCCCTCCGTCGGGCTGGGGCTTCCCCCA  
GCACACACTATAGTGATGCTCTGGG

>1355

GGTCTTGGTGCTACACAACAGACCCTGCTGTGCGCTTCCAGAGCTGCGGCATCAAAT  
CCTGCCGGGAGGGTAAGCGGCGCCGGTCAAGCTGGGAGAGTGGAGACAAGCCCAC  
GTCCATCCACGAACCCACTGGCTCTT

>1356

CGGAGTCAGGGCGGAGTGCCAGCGCTGGGATCTTACGACCCGCACCAGCACCCCT  
TCGAGCCGGGCAAGTACGCGTAGGCGGTATCGGCGTCTGGGGGCCGGGCTAGGGAA  
GGTCCAGGACTCCAGGGGCAGGGCTC

>1357

TCCGAGCGGCCATGGTGCTACACTACGGATCCGCAGATCGAGCGAGAGTTCTGTGACC  
TCCCCGCTGCGGTAGGCGGCGGGGACCAGGCCTGGGAGGGTACCTGGGAACCTTGG  
GGAGGGGCGTGGCTTGCCGGGGAG

>1358

TACCTTGCCAGCGTTGGGACGCGCAAATCCCTCATCAGCACCGATTTACGCCAGAAAA  
ATACGCGTGCAAGTGAGGTGGGGGGGGGGGCGGGCGTTGGGACGTGCTGCTGCGGG  
TGAGACGGGAGGAAGGTAGTCACGG

>1359

CTGCGGCCCCGGCATGCGCGCGGCCCTTTTGCTACCAGATCCGGCGTTGTACAGACGACG  
TGCGGCCCCAGGGTGAGGCCAAGCTTGGGGGCTACAGAGCCGGGCTGGAAGCTGGA  
ACCGGAGGCCGGGGCGAGTCTCGG

>1360

GCACGGTCAGCAAGACCCGCAAGGGTGTCCAGTGCCAGCGCTGGTCCGCTGAGACGC  
CGACAAGCCGCAAGTCCCTGGTGCTCCCGGCCCCGCCAGGGCCCTAACCTGG  
GGCGGCATGCTTTGGTGCTGGGACC

>1361

AGCCATGGGGCCCTGGTGCTACACGATGGACCCAAGGACCCCATTCGACTACTGTGCC  
TGCGACGCTGCGGTGAGCACTAGTGACGCTTCCCCATGACCCTGCCTCAGCCCCAC  
CCAAAGGCTGGCTCCCTTAACCCC

>1362

GGCGTTCCAAGCTGCGCGTGGTTGGGGGCCATCCGGGCAACTCACCTGGACAGTCA  
GCTTGCGGAATCGGTGAGGCACAATGCCTGTCTCCACAGAGAGGAGCTGAGGTTG  
TGTCTCTGTGGTTATCCACTGGGGC

>1363

AGCATTCTGCGGGGGTCTCTAGTGAAGGAGCAGTGATACTGACTGCCCGGCAGTG  
CTTCTCCTCCTGGTGAGCCTCCCTTGTTTTGGGGACCCAGTCTCATCCACCTCCCC  
CTTCCCCAGGCAAGCTAACCAAGT

>1364

AGCGGGTCCCAGTAGCCAAGATGGTGTGTGGGCCCTCAGGCTCCCAGCTTGTCTGCT  
CAAGCTGGAGAGGTATGTGGACAACCTGGGAGGGTGTGAGGTGGGGCTGGGCCTTGT  
GGCCTCAGACCCTGAGTGCCCCAT

>1365

CTGCCCCCTGAATGGTATGTGGTGCCTCCAGGGACCAAGTGTGAGATTGCAGGCTGGG  
GTGAGACCAAAGGTAAGAGCACAGTGCACAGGACTGCTGGTGGCCAGGAGGCCAGC  
CCTGGATCTTCTGCAGGACCCTCTC

>1366

GCACCGAGGACGTGTGCGGGAGAGTGAGATGTGCACTGAGGGACTGTTGGCCCCTGT  
GGGGGCTGTGAGGTTGGTGGCAGGGCCTGGGCAGCCCTGGAAGTATGGGGGGCTAG  
AAATGAACTATTTTATCATGAAGCAG

>1367

TGCCTGCGGACAGGCCCCAGGGCTAGCGGCTTTGTGGAGGGAACACTGGGTATCCTC  
TCCACAGTCCAGGTAGGTGGGACCCCACTCCTGGCTCTCAGCCTTTAGGAACAGGAG  
CTTCTCTACTTGGAGCTTCTAGAC

>1368

CTCCCTGCCAGTGAGTTTCGCTGCCTACCCCGGAGGACGCTGTCAGCGCCTTTGAGA  
TCGAGCGTGAAGGTGAGTGGCCCCGCACAGGGTCAGAGGGATGCTCCACTCTGGTCC



AGTTATCCTGTGGGGAGGAGACCCT

>1369

CTGGTTCGAGGAGGGCTGCCTTGTGGCCTTCATCATCGGCTCGCTCTGGGACAAGGAG  
AGACTCATGCAGGTGAGGACAGGCCTGCGACGCCAGCTCCAGGGAGGCCTCTGAAG  
ACAGAGGTCAGCCAGATGGCGGGGA

>1370

AAATTCGTCATTGAAACATAGTGGAGGCCGAGCAGTCAGGGACATTTCTGAAGCGA  
GCGTCTTCGATGGTAAGTGGGTACCGGCGCGAACTGTGTGAGGATCCAGTATCTTAA  
AGCCTTCGCCCAACTTCGCCCTT

>1371

CAAAGTAGTCAGGAATCGATCTCGTGAAGCCCGCAAGGACCGAACACCCCCACCCG  
ATTTAGACCTGCGGTGAGTATTTTAAAAGGAGAATGGAAGCCAGAGGAGTGATGGTTA  
AAATTCATCCTGGAGGGTCAGGGT

>1372

AGGTTCACTGCAACCGTTCAGAGGTCCCAGGAGCTGCTGCTGGCGAGCCCGCTACTG  
CAGGGACCTATGGTGAGCAAGGCTACCTGGTGAGGGGAGACAGGCAGAGGGGGTCTA  
GGAGCCTCCTTGGGGGGAAGAAGCT

>1373

TTCCAGCAAGTTTGTTCAGATTGGCTGTCAAGAATCATGGACTGTTATTATATGCCTTG  
TTTTCTGTCAGTGAGTAGACACCTCTTCCCTCCCCCTCTCCGGAATCACTCTGCCTC  
ACCACCCCTGCTCGCCGGCTG

>1374

AGCACTGGTCTTGAGTATCCTGAGCGCCCGCCAGCCGGGCAACACCGTGAGGAGC  
TTCCACCACGAAGGTCAGTCTTCCCCAGTCTGCGTGGGGGAGGGCTGGTGGGACT  
GGCTAGAGGGGCAGTGAAAGCCCTG

>1375

GGAACCCACTTAGGTGGCACCAATCTTGACTTCCAGATGGAACAGTACATCTATAAAA  
GGAAAAGTGATGGTTAGTCAATTGCTTTAATTTTTTGTACTCCAGCTGTAAGTACAAATT  
TTGAGCTTGCTATTCTCGTGGT

>1376

AGCTCGTGCAATTGTTGCCATTGAAAACCCTGCTGATGTCAGTGTATATCCTCCAGGA  
ATACTGGCCAGGTTTGTGGAACAGTGGTTAGTTTTATATTATAGAAATAAAGCCTTACA  
GACATTGTGAGACATATAGAA

>1377

TACCATTGCGCTGTGTAACACAGATTCTCCTCTGCGCTATGTGGACATTGCCATCCCATG  
CAACAACAAGGTAATGATTTTAGGATCTAGAGTTTGTGAATGCGTGCTCTAGAAAAAA  
CATTCTGTGCACATTGTTAGA

>1378

TGGCACCATTTCCCGTGAACACCCATGGGAGGTCATGCCTGATCTGTACTTCTACAGAG  
ATCCTGAAGAGGTAAGCTTCTCAAAGGCTTGTGGTTACATAAGCAAATTGGACGACT  
TGGACTGCTGTCTAGGAAGCAAA

>1379

CAGCCTGAGGTTGCAGACTGGTCTGAAGGTGTACAGGTGCCCTCTGTGCCTATTCAGC  
AATTCCTACTGGTATGTATCAGGATAGAGGTGAATCAAGCTGATATTTGCAACTTCTC  
AGTTTTATTCTAACTTTAATGA

>1380

CATGGAGCTGTTCTGCTGGTCAGGGGGCTGGGGGCTGCCGTCAGTGGACCTGGACAG  
CCTGGCCGTGCTGGTGAGGGGTGGCGCCGGCGCCCTCTGCTGTGCCCTGATGACTGGG  
GAGGGGGCCGAAGTACTAGCCAAGCATC

>1381

ACCTATGCCAGATTTACTGGTGCTCCACTGAAGGTACACAAGATCAGCAACCCCTGGC  
AGAGCCCTTCAGGTACCCAGTATCCCTTGGGGGTAAAGGAAGGGTGTGTACAAGGGGA  
GAAGCAAGAAATAGGCAGGAATGTG

>1382

TGCCCTTCGGACCAGTCATGGAGAGGTCATCTCAGTTCCACACAAGATCATCACCCAC  
CTTCGAAAAGAGGTAGGTGACTTGGATAGAGGGGGCTGCCAGTGAGAGAAGTTCAGT  
CAATTCTATACAATACACATTTATT

>1383

GTCAGCTCGGCAAGGGGCAGACACCCTGGCCTTCATGTCTCTCCTGGAGGAGAAGTT  
GCTCCCGGTGCTGGTGAGTGTGCCCAGACCTCCAGCATCCATGGCCAGCCGGGGAG  
GGTTCGGGAACACACAGACCCACACA

>1384

GTACATGGAACGGCTACAGCTGCTGACTGGGGAGCACAGGCCTGAGGACGAGGAAGA  
GCTGGAGAAGGAGGTAGCTCTGAGACCGGGGCTATTGTATGAGATGAGCCCAAGGA  
TGCTGGCCAGGAATGGGAGTGCTTA

>1385

GAGAGGCTCGGGAGTGTCTGACCCTGCTCTCTCAGCGCCTGGGCTCTCAAAGTTCTT  
CTTTGGAGATGCGTGAGTCTGACTCCAAGAGGGTAATGGGTGGCTTGAAGAAGATAC  
AGGTTTCAGATGGAGCAGCTGGAGC

>1386

CTGCGTGGGCTGCACAACCTCTGTGCCTATTGTACCCACATTCTCAGTCTCTACTTCCC  
CTGGGATGGAGGTAAGGGGCAGATGGGAGGGGCAGCCCTGGGGAGAGTGGGCAGGG  
ATCCAAGAACTAGTTCTCCTAACAC

>1387

GGACCATCCCAGACAGTGACATCTCTGCTTCCAGCTCCTGGTCAGATCCACTGCCGC  
CCGCCACAGCAGGTACTTGGCACACCTGGCACACTTGTAGCTGCCCCGAGAGGAGCT  
CCTGGGACCTCTACTTCCCCTCAA

>1388

TTCTACCCCCGGGCTGACCGGGTCATGAGTGTCTGTCTGCGGGTAGAGCTCTATGGCTG  
CCTCTGGAGGGGTGAGTGGCTCAGTTCCTGGGAATCTGTTTCTGAGCAGGGGACTG  
GAGGGTGGGGAGTGTGGCGAATG

>1389

CAGCTTCTCCAGTGGCTATGTGGAGATGGAGTTTGAGTTTGACCGGCTGAGGGCCTTC  
CAGGCTATGCAGGTGAGTGTAGTCCGGCTCTCGAGGAGGGCTCTGAAGCCATGCAGGG  
TGCCGTTGGGGTGCCCCACCACTC

>1390

CGCTTCTGCAGTGCCGCTTCTCTTTGCGGGGCCCTGGTTACTCTTCAGCGAAATCTC  
CTTCATCTCTGGTAAGCCCTGGAGTAGCCAGTCTCCAGTCCCTGAAATTGACAACCTG  
AGTTCATTCTAACCTGCAGTG

>1391

CTGGGAGGCACCTTCCCGCCAGCCCCCTGGTGGCCGCCTGGCCACCTCCCACCAACT  
TCAGCAGCTTGGGTGAGCAATCTTGGGTGGGCGTGTGGACCCTCTGCACCCTTCTCCC

TGGGCCTCCCCCTCGGCTAGGGTG

>1392

CATCCTGCTCCTGCTGCTCATCATTGCCCTCATGCTCTGGCGGCTGCACTGGCGCAGGC  
TCCTCAGCAAGGTGGGCACAGCCGTGGCATGTGGAGTGGCGGGGGGAGGCCAGGCCC  
CAGCACGAGCCAGCGTCCAGTGGG

>1393

CCCCCGTACCAGGAGCCCCGGCCTCGTGGGAATCCGCCCCACTCCGCTCCCTGTGTCC  
CCAATGGCTCTGGTAAGACCTGCCTTGTTCAGTCGCACCTCTGTCTCTCTGCTGTTT  
TCTTATTGTATCCCTTTCCATT

>1394

ACTTACGCCCGTCCCCCTCGAGGCCCGGGCCCCCACACCCGCCTGGGCCAAACCCA  
CCAACACCCAGGGTAAGCCCTCTGCCCTGGGCTCCGCCAGGCTCCCATACTCTA  
CTGGGGCAGGGAAAAGCCCTACA

>1395

CCCAGAGTGGATTTCCCTCGATCTCGACTCCGCTTCAAGGAGAAGCTTGGCGAGGGC  
CAGTTTGGGAGGTAAGGAGGGTGCCTACCCAGTGTCTGGCCCTATTGTGTGCTCTGA  
TGCCATGCCTGCGCATCCCCCTAG

>1396

ATGTGCGTAAGGGACACCCTTTGCTGGTAGCTGTCAAGATCTTACGGCCAGATGCCAC  
CAAGAATGCCAGGTGAGGACCAGGGATGGCATCTGGAAGAAGGGAGGGGAGGCCGC  
GAAGAGTGGCGAGCCATCTAGAGAGA

>1397

ACCAGCTGGAGGACAAGGCAGCCGAGGGGGCCCTGGGGACGGGCAGGCTGCGCAG  
GGGCCACCATCAGGTACCTGTTTACCCAGGCTGGGCCATGCTCAGAATTCCCCAGG  
GGATCTCCTCTCTCCCCTCGTTCA

>1398

GGACTATTACCGTGTGCAGGGCCGGGCAGTGCTGCCATCCGCTGGATGGCCTGGGAG  
TGCATCCTCATGGTGAGCAGCCCAGGACAGCCAGTTGGAGCAGGGCAGGTGGGAG  
AACACTGGCCGCCACTCACAGCCCT

>1399

TGGCATCAACCAGCGGTCTCGGATGCTAACCTCTACCGCCTCCTGGACCTGGACCCC  
AGGCCACGATGGTGAGCTTTGGGGGACATTCTGCTCTGCTCTGGCTGGGCTTGGCAC  
GTGTTGTTCTTCTGCTCCTGCTG

>1400

AGTGAAGGAGACAGTGTGCCCCAGGACGACACAGCAGTCACCAGAGGATTGTGACTT  
CAAGAAGGACGGGGTGAGGCTGGGGGCTGGGGGTGTTGGTGGGTGCCTCCCAAGGA  
GCTGAACAGGGGGCACCTGGGGAATAT

>1401

GGTGAAGCGGTGTATGGGGACAGTGACCCTCAACCAGGCCAGGGGCTCCTTTGACATC  
AGTTGTGATAAGGTGAGTGGGCTGTTCTGGGATGCAGGGGCTGATGGGGGCATAGAGT  
GTGGACCATCCAATGGGTCAATTA

>1402

TCTCTGCATGGATACTTCGTCTTCGGGCCACAGGATGCAATTTGGAGGGCTTCTTTC  
CACCTGGGCGGTATGAGCCGGGTGTGGGTGGGGTGTGCAGGAGCCCCGGGAGCATGG  
AGGGGTCTGGGAGAGTCCCAGGCT

>1403

TCATGGGCGTTGCCTTACCTGGGTCATGGCGCTGGCCTGCGCCGACCCCCACTCGC  
CGGCTGGTCCAGGTAATGGCACTGAGCAGAAGGGAAGAAGCTCCGGGGGCTCTTTGT  
AGGGTCCTCCAGTCAGGACTCAAAC

>1404

GGTCCACTTCACCATCCCCATGATTATCATCTTTTTCTGCTATGGGCAGCTCGTCTTAC  
CGTCAAGGAGGTACGGGCCGGGGGGTGGGCGGCCTCACGGCTCTGAGGGTCCAGCCC  
CCAGCATGCATCTGCGGCTCCTG

>1405

CATCCCAGCGTTCTTTGCCAAGAGCGCCGCATCTACAACCCTGTCATCTATATCATGAT  
GAACAAGCAGGTGCCTACTGCGGGTGGGAGGGCCCCAGTGCCCCAGGCCACAGGCGC  
TGCCTGCCAAGGACAAGTACTC

>1406

ACAGGTTTTATTTTTTTCTTGTTTTTTTACTGAATCCCTAACCTGCCACACAACCT  
CGGGATATAGGTAAGAAATTTACTTGATATCAGCTAAAGCATGACCAGTTAGGATAATT  
TCTATTTTTAAAATTTTGTT

>1407

GAAAGACATGGTAGAATACAAAGACAGATGTATGGCTGACAAGACGCTCCCAGAGTGT  
TCAAAATTACCTGTAAGTAAATGCTTGTGTTCTTTTCTTTTATCTATGTCTTTCTTT  
CTCTTTCTTTCTTTCTTTCTT

>1408

CTTCCCTACCCTGGATCCCGAAGAGAAATGCCAGGCTTATGAAAGTAACAGAGAATC  
CCTTTTAAATCAGTAAAGTTAATCTTAGTAAAAATGATCCAGTTGAAGAATTAGTCTTA  
GGCTGAATCTAATATCTATCTC

>1409

TGTTCAATTTGAGGAGGTGGCCAAATCATGTTGTGAAGAACAAAACAAAGTCAACTGC  
CTTCAAACAAGGGTGGGTATAGCATTGTTCATGAAGAGGATAAGAAATCACTCAATA  
CCACAGATCCAGACCCTGACTTA

>1410

CATTTTCTTCTATCAAAAACATGTCTGTGGGGCACTTTTGAAATTTGGAACCAAAGTT  
GTACACTTTATGTGAGTTTATACTATATGTCTTGTCTCTGCTTGCATTTCTTGTCTGTG  
TCCCATTTTTGTTAAATGGT

>1411

TGTAGAAGATGTTTCTTCCAATATGATGGATGCTGTGAAGGGGATGTTGTGCAGTGCA  
TCCGTGACACGGTGAATATTCTCTAAAACCAAGTTAAAATAGTGATTTTTGGCAATTATC  
ATTTTTTTATTCTCAAGTTGC

>1412

AAGGAAAATTTACTGACAGTGAAAATGTGTGTCAAGAACGAGATGCTGACCCAGACA  
CCTTCTTTGCGAAGTAATATACTCTTATTGAATTTATAAGGGAAACAGAAAGAACT  
TGTAAGATTTGACTTTTGTGCTA

>1413

TCAAATATACAAAGATCTCCTGAGAAATTGCTGCAACACAGAAAACCCTCCAGGTTGT  
TACCGTTACGCGGTAGGTTCCATTGTTGTAGGTTCCAGAAAATCAAAAAGAACAATA  
GAAAACACTTAAAAATTGATATCA

>1414

AAAGCCTCAAGATGGTACAACAAGAATGTAAACATTTCCAGAATTTGGGGAAGGATGG  
TTTGAAATACCAGTATGTTGTTTGCACAAGTGGGCTAACACTTGCCACTAGAATTGAAT

ACATAATCCCTCGAAGCGTAAAA

>1415

CGAGAAAATGGTGACAGCTTTCACACTTGCTGTACGCTAAGTGAAGAGTTTGCCTGT  
GTTGATAATTTGGTGAGCATGGCCTGTGTACCAGACTACTCTTTTTTTTTTTTTTAAAA  
AAAAGAATATTTGCACTCATTG

>1416

AAGATTTATTTACCTTTCACGCAGACATGTGTCAATCTCAGAATGAGGAGCTTCAGAGG  
AAGACAGACAGGTACAAATAATCTCTCCATTCTTCTTTTTCTTTGGTTTGAAGACACA  
CCATGTATTAGTGAGAAGGTTT

>1417

TACAAATTTTCGCAAATGTAGTGGATAAAGTGCTGCAAAGCAGAGAGTCTGAAGTCTGC  
TTTAATGAAGAGGTAGTTTTATTTCTTTTCTACTGAAATTCAACTGGTTTTCTGGTCAA  
ATAAAATAAAACAGAACCCTGC

>1418

ACAACCACAGTTGCAGTTACTCCACCTACGGCATAAAAACACCAAGGAAATATCAAAG  
AACACAACGCAGGTAAATTAACAGTATATAAAATGAGTAATCCGACAAGAAGCATGG  
ATTTATGAATACAACCATAAATTC

>1419

GTGGATTCCCAGGGACTGTGCGAGGTGTGGACTCTGCCTGCCTACCTGGTCTGGGAAG  
ATGTTCTACCATGTGAGCAGGGCTCAGGGTGGCGGCAAGGGCTGGGTGAAAGGAAG  
AGCAAGGCCAGGCGCCGGCGGAGAGA

>1420

TCGGCCCAACTTGCTCAACACGGTGAAGCAGAAGCTTTCACCGAGGTGGAGGGGA  
CCTGCACAGGGAAGTGAGTGTGAGCTCACCGCACCGCCAGATCGTTCGATGCGCAC  
ACGGGGCGCTATACCTGCAACCCCTC

>1421

GTACAAGGCCATTGTTTTCCGGCCATTTAAAGGGGAGGTCGTGGATGCTGTTGCTACTC  
AGGTCAACAAGGTGAGACCATACATAGGGGAGGCAGTGGGGTAGTCTCTCGGAAGAT  
CTGGGTTGGGTTCTGGCTCCAATT

>1422

TATTGTGATTCAGCAGGACGATGAGATCCGCTTAAAGATTGTGGGGACCCGTGTGGAC  
AAGAATGACATTGTGATCTTTTCCCCACCTCTACCTATAACAGGTTGAGCTGAGAAC  
TGTCGATTTCTTTTTCTTTTTT

>1423

GCACTGGGGCCCCTGCAGAGCTTCCAGGCCCGCCTGATGACCTGCTCATCAGCACCT  
ACCCCAAGTCCGGTAAGTGAGGAGGGCCACCCACCTCTCCCAGGTGGCAGTCCCCA  
CCTTGCCAGCGAGGTCGTGCCCTC

>1424

AAGTGTACCGAGCTCCCATCTTCATGCGGGTGCCCTTCTTGAGTTCAAAGCCCCAG  
GGATTCCCTCAGGTGTGTGAGTGTGTCCTGGGTGCAAGGGGAGTGGAGGAAGACAGG  
GCTGGGGCTTCAGCTCACCAGACCT

>1425

CCCACGACTCCTGAAGACACACCTGCCCTGGCTCTGCTCCCCAGACTCTGTTGGAT  
CAGAAGGTCAAGGTGAGGCAGGGCACAGTGTTCACATCCATAATCCCAGCACTTTGG  
GAGGCTGAGGCAGGCAGATCACCT

>1426

CACATGGCCAAGGTGCACCCTGAGCCTGGGACCTGGGACAGCTTCTGGAGAAGTTC  
ATGGTCGGAGAAGGTGGGTTTGATGGGAGGAAGGAAAGTGTGGAGCCGAGGGGTGGT  
GGCTACAACGCACAGCAACCCTGTGT

>1427

CGTGCAGGAGTGGTGGGAGCTGAGCCGCACCCACCCTGTTCTCTACCTTTCTATGAA  
GACATGAAGGAGGTGAGACCACCTGTGAAGCTTCCCTCCATGTGACACCTGGGGGCC  
GGCACCTCACAGGGACCCACCAGGG

>1428

CCTATGACCAACTACACCACCGTCCCCAGGAGTTCATGGACCACAGCATCTCCCCCTT  
CATGAGGAAAGGTGGGTGCTGGCCAGTACGGGGGTTGGGGCGGGTGGGAGCAGCAG  
CTGCAGCCTCCCATAGGCACTCG

>1429

AGCTGTAACGGATACTTCGTCTTCGGTCGCCATGTTTGTGCTTTGGAGGGCTTCTGGG  
CACTGTAGCAGGTACTGCAGGGGAAAAAGGGGTTAGGGGAAGGCAAAGTTGCTACT  
CCGCTGGAGGGGGTTCTAAAGAG

>1430

TGACGGTGGTCTGGCTACCTGGACCATTGGTATTGGCGTCTCCATCCCACCCTTCTTT  
GGCTGGAGCCGGTGAGAGTGCAGGGCAGTGGTGTGAGTAACTAGGAGCTCAGGTT  
GATGTGGGTGGAAAGAGAGCTTGG

>1431

CTTCTGCTTCATTGTGCCTCTCTCCCTCATCTGCTTCTCTACACTCAGCTGCTGAGGGC  
CCTGAAAGCTGTGAGTGGCATTGATAGTCAGGGAAGAAGGGGTTGGGGCTCCACAT  
GAGAAGGAAGAGTGCTCTGAAA

>1432

CATTCCTTATTCTTCTCCAAGAGTGCTTGCATCTACAATCCCATCATCTACTGCTTCAT  
GAATAAGCAGGTAAAGCTTTTATTACATTCTATGGTCCAGAAGACCCTGGTTCTTT  
TCTCACCATTGACTTTTAACT

>1433

GTGGACGCTTCTGGGCACCTGGAAGCTAGTGGACAGCAAGAATTCGATGACTACA  
TGAAGTCACTCGGTGAGCAAGCCGCGGGGCTCAGGATGTTGGCTTGGGGACTGGCTG  
GTGGCGTGCCTAGCCCCACGCAGCA

>1434

GAACACAGAGATCAGCTTTAAGTTGGGGGTGGAGTTCGATGAGACAACAGCAGATGA  
CAGGAAGGTCAAGGTAAGTCAGGGAACAGGGGTGGGGAATGGAGAGTGCTGAGAC  
TCTAAAAGAGAATAGGCTGGTAGTCTT

>1435

TCACCTGCAGAAATGGGACGGGCAAGAGACCACACTTGTGCGGGAGCTAATTGATGG  
AAAACCTATCCTGGTAAGATGGGCAACTTTGGAGCTATATCTGATTGGTTATTACTACTG  
CTCTTTCAGCCAAGCCTGTTCTA

>1436

GGGCCGAGGGCTGCCGGTCCGGGCTCCGCTCAGCACCCCTCAACGGCGAGATCAGCGC  
CCTGACGGCCGAGGTGAGATCCAGATCCGACCACTAGATCATCTTATACCGACGGGG  
AAACGGAGGCCAGAGAGGGCGTGGG

>1437

ACCGACGGTACCATGAAGGACGAGGTAGCTCTACTGGCTGCTGTCACCCTCCTGGGAG  
TCCTGCTGCAAGGTGGGCTGGTTCTATCTAGGAAGAGGGTGGGCCTTAGATCCCTAC

AGCTTGCCCTCTGCCCCCTAGGCC

>1438

GCAGGGCCTTCCGCGTGTGCGCCCGCTCACCACGGCCACCCGAGTTCGAGCGCG  
TCTACCGAGCCCAGTGAGGCGCGGCGGGAGGGCGGGGCGGGGAGCGAGCCCCAG  
GCGGGTCCGGGTCGCAGGACCATCCCG

>1439

GTGAACTGCAGCGAGTACTTCCCCTGTTCTCGCCACGCTCTGGGTGCGCCGGCATCT  
TCTTTTCATGAAGGTGCGGGGTGTGGGGCAGGGGCGCACGCGCTGGACCCCGGGACCC  
GCGCAGGGCGCTCACCAGGCCCGTG

>1440

TGTGCGGCCTGGTCTACCTGTTGCGCGCCTCCGCTACTTCCAGGGCTACGCGCGCTCC  
GCGCAGCTCAGGTGAGGGCCGGGCGGGGAGCGGGGCGGGCCGGGGAAAGATCGCG  
GGCGGGCGGGGCTCCTGGGGAGCGG

>1441

ATGGGGCTGGGCCGGGTCTGCTGTTTCTGGCCGTCGCTTCCCTTTTGACCCCCGGC  
AGCCGCCGCTGGTGAGTGGGGTTCCTGGCGGTCCCGGCGGAGCGGGAGCGGCGGGG  
CGTTTCCGGGGTCCGGGTGGGTT

>1442

ACCGAGGACTTGACAGAGAATGGGCAAGACCTCAGGAGGACCCTGACTCATATCAAG  
GACCAGAAAGGAGGTGAGAGTCGGCAGGGGCAAGAGTAATGGGAGGCCTTCTCCAG  
GAAAGTTGGAGACAGAGAGCAGGGACC

>1443

GCTATGCAGGCAGACTGCCTGCAGAACTACAGCGATATCTGAAATCCGGGGTGCCA  
TCAGGAGAACAGGTACCGACCCTGGCCAGGGGCTCTACTGTTCCCGCAATTCTGCTAG  
AGTTGCCTCGCTCCAGCTCTGT

>1444

GGAGAGGAGCAGAGGTTACCTGCTACATGGAACACAGCGGGAATCACGGCACTCAC  
CCTGTGCCCTCTGGTGAGCCTGGGGTGACCCTGGAGAGGGTCAGGCCAGGGTAGGAA  
CAGCAGGGACGGCTGTGGCTCTCTGC

>1445

TGTTTTGTTATTATTATTATTCTCTGTGTCCCTTGTGCAAGAAGAAAACATCAGCGGCA  
GAGGGTCCAGGTGAGAAAAGGGGACAGTTTCTGGAGATGGGAAAGCTCCTTTCTAGG  
CAGTAGGGTCTCCTCATTGCTCC

>1446

CAGCCGCGGTCCAGAGCGCGGAGGTTCCGGGAGCTCCGCCAGGCTGCTGGTACCTG  
CGTCCGCCCGGCGGTGAGTCCGCGCGGCCCGGCGGGACGCCCCGCCACCTGCGCG  
CACCGTCAGACCCGGCGGCCTCGGCT

>1447

ACGGCCATCCTCTCCAGAATGAAGATCTTCTTGCCAGTGCTGCTGGCTGCCCTTCTGGG  
TGTGGAGCGAGGTGAGGTGCCCTTGGGGACCCAGACCTTGTCCAGCTGTGCCCTGC  
TCCACTCCCTCTCCACCCCTCTC

>1448

TGCCTGAAGCCGACCATCTGCTCCGACCAGGACA ACTACTGCGTGACTGTGTCTGCTA  
GTGCCGGCATTGGTGAGTGCCAGGCTCAGACCGTGCTTCTCCCTGGCCATCTCCCT  
AGCCCGGGCCGGGGCTCAGCAGA

>1449

GCTTTGCCTCTGAGGCCCTGACCCGGGGCTTGGCCAGCGCTGCCAAAGGAGGCCAC  
GGAGGAGCAGGAGGTGAGTGGGGAACGGGCGGATCCGGGGGCTCCCCTACCCTGCCC  
ACCTGTTACAGGCCCGCCGCCCCAG

>1450

CTATCTCCA CTGGGCCACCGCCCGCGCCCCGAGTTCCGTCCCTACCAACACCTCCGCA  
TCCGCACCAAGGTACGCGGGACGGGCGCGGGCGGCACGGGGGTGCTGCGGGGGC  
GGGGGGGGGTGCTGCGGGGGCGGGG

>1451

CTGAAGGGGCTGAACCATACTCCTTTTTCTACAACCAGCTTGCATTTTTTCTGCCCA  
CAATGAGCGGGGTAAGATTTTTATTTTTGGCAAGGGGTATAATTTGGGTTCCTGTGGC  
TACTTGAACACTACACTGCAGC

>1452

CAGCGACTATCTTCTCCTCTGGGGACCACTTGGCTGAGGACCTGTGCGTGCAGGCTG  
CCAAGGCCAGCGGTGAGTGCATCCCTAGTGGATCGGGCCAGAGGGAAGGATGGGGCT  
GTGTGGGGCCAAGATTGGAAGCTGG

>1453

GCTGGTTCCTCCCGAGCCACATCTTCTCCGTGGAGGATGCCAGCACCCAAGTCCTGCT  
GTACAGGATTCGGTCAGCCCCGCACAAGGCGGATAGGACAGTTAGTATCAGGGTCCT  
CTGCATCTCTGCTGGGACCCACAC

>1454

CTTCGGGCTACGCAAGGATTTGGCCAGTGCTATCCTTGACCTGCCAGTCCTGGAGCAC  
CTCTTTGCCAGGTGGGGTTTCTGCTGGGGTTTGACCAGGGGGTTGGGGTCCAATGG  
GCAACATGAGGACTGGCATGCAAT

>1455

CCGTGTTGGACCTGGCCCGGATGGCGCGAGAGCAGGCCAGCGGCCGGGAGAGCTGC  
TGAAGACTGTCAGGTGAGAGCCACCAGGCTGTGGGGACGGGCTCTGTTGGGAGTGA  
GCAACGTGGGCTCCATCGGGGGTTTG

>1456

GGCCACGACGGGCTGGGGCTGTTCCGCGTGGCTGGTGACGGCGGCATCGCCTGGACC  
CAGGGAGAACAGGGTGAGGACGGCTTCCCCCTGGCGGGGCCAAATGGGGGGGGGT  
TTGGGGAGGGGCCGGAGATTTGTAGGG

>1457

GCCCCGCGGTTGGCCCGCCGAGAGCACCCTGGTCACTGTTACCAGGACAGAC  
AACCAGATTTAGGTGGTGCAGGATTCCCCTCCCCTTCAGCCTTACCCGAAGGGCG  
GGACCGCACCCCTCGGGTTTCACTG

>1458

TCCTGGCTCCTATGTTCTCCGCCGAGCCCCAGGACTTTGACAGCTTCCTCCTCACTG  
TCTGTGTCCAGGTGGTCTACTGCTAGGGTGGGTAGTGGAGGGCTGCCTGGACAAGAG  
GTTACCTCTGAATTGAGATTTAC

>1459

TGGGATGGGGGGCTGCACGTAGATGGGGTGGCAGTGACCCTCACTTCCTGCTGTATCC  
CCAGACCCAAAGGTGAGGCCCTTGGTCCCCTGGAATGAGTGGCTGATCTGGGACCCT  
GGTTTCCTATGTCTGATAACAGCT

>1460

TCAGCCCAATCCAATACCAGCTGAGTCAGATGACATTTACAAGATCCCTGCTGACA  
GCCTGGAGTGGGTAAGAGGCCCTGGGAAATGAGGCGATACCTCAGTCTGGGGTCCAG



AGACTCAGATGCGTGGCCTCAGGC

>1461

GGATGGGGAGGCCCGAAAGACAGAAGTGCTGCTGAAGGTCATGGATGCCAAGCACAA  
GAACTGCATGGAGGTGAGAGGCAATGTGGACCAGACTTTTGGAGTCGGGGGGCTGGCT  
TGAGCGGGGCTCGTGGATGCAGAGAC

>1462

CGAGCTTGATGAGCCAAGTGTCGTACCGGCATCTCGTGCTGCTCCACGGCGTGTGCAT  
GGCTGGAGACAGGTGAGTGCTCCTAGGGGTGTTAAAGGGGAGAGGGAGGAAAAGA  
GGGCGAGGGGGGAAAGAGAGCTAGGG

>1463

TGCCACCTGGTGCCAGCCAGCTGGAAGCTGCAGGTGGTCAAACAGCTGGCCTACGC  
CCTCAACTATCTGGTGAGTGCTCCTCCCCCAGGGGATTTGGTTTGGGGGGAGGGGGG  
GGGTTTAAAAAAACCCAACCCCTA

>1464

GGCTGATGGGAGCCCGCCTTCATCAAGCTGAGTGACCCTGGGGTCAGCCCCGCTGTG  
TTAAGCCTGGAGGTAAGTTCCTGGAGGTGGAGGAGGGAGGGGCTGAACAGGGCAAG  
GAAGTGGATCCCTGATCCCACTTTCA

>1465

CTTCGGCGCCACGGTCTGGGAAGTGTTAGTGGCGTCACCATGCCATCAGTGCCCTG  
GATCCTGCTAAGGTCAGAGCCCCTACCCGGCATCGGTCTCCGAACCCCACTTTGAC  
AGCCGGGCAGACTGACATCCAGTC

>1466

GCCTATGAGCCGGTCCAGAGGCCCTCCTCCGAGCCGTCATTCGTGACCTCAATAGCCT  
CATCTCTCAGGTGCCCGCTGGGACGGGTGGGTGGGGAGGGGCTGTGATGTCATATTG  
GGCCAGTGGAAAGGAGCGTGTT

>1467

GCTCTATGCCTGCCAAGACCCACGATCTTCGAGGAGAGACACCTCAAGTACATCTCA  
CAGCTGGGCAAGGTAAGGTGGGCAGGGCCAGGGTGGGTGGAGAGGCAGGGCAGCA  
TCCAGGTACCTGGACATCAGTGCCGC

>1468

CTTCCTGCAGCGGCACCGCGCGCCTCGATGCCAGCCGCTCCTTCTCTATTCTCGC  
AGATCTGCAAGGTGAGAGGGGGCGCCCCGGACTTGTGGGGATTAGCTGGCACGGC  
CTGGGCAGGGGTCTGCTTGGAGGT

>1469

CTGTGGGCAGACAGCCATGCACCTGCCCCAACTCTGGCAGCACCCGGCCAGCCTCTG  
CGCGTTCTCAAGGTAAGAGCAGGCCAGCCCTCCTCCCTCCTGCCGGGGCTGGAGAG  
GCTGGTGTGGACAGGACCCTGTGCC

>1470

CCGCTCCTTCAGCTCCACCGCCCGAACCCTTTCAGAACCGAGTGC GCGAGAAACA  
GAAGCTCTCCAGGTGGGGGGTCGGGGGGGGTGGGGATCCGACGCGCCAGCCGGGA  
GCGCGCCGAGCCGGGCAGGCGGGGCG

>1471

CCGTTGTACTGAAGGGCGGCATCGTTGACAACATCCTGTACCGAGTGACAATGACGC  
TGTGTCTGGGCGGTGAGCGCAGGGCCCGTCTGGGCTGCGGGGGAGGCGGGGCTGGAC  
CCAGAGTAAGAGGTGGCTGGTTCT

>1472

TCCTGCCTTGGCCATGAGGGAAATCGTGCTCACGCAGACCGGGCAGTGCGGGAACCA  
GATCGGGGCCAAGGTTGGCAGCCGGGGCTCTGAGGGCCAGCCCGCCTGCCGGGTG  
GCCGGGGAAGATGTTGGCAGCGGCGG

>1473

GCTGGCACCTACCACGGGGACAGCCACCTGCAGCTGGAGCGCATCAACGTGCACCAC  
CACGAGGCCAGCGGTGCGACCCCCGTCTTCCCCACCGCCCTCCTGGAAACGCGGC  
CCTCCCCTCGCTCATGCCCTCCCGCC

>1474

CCGGGCACCATGGACTCTGTGCGCTCGGGGCCCTTCGCGGAGGTCTTCAGGCCAGAC  
AACTTCATTTCCCGTGAGCTGCGGGCGAGGACTGGGGTGCGGCTCCTTAGCCAGGGCA  
GCTCGAAATCCAGGAACGCTCCAAG

>1475

CGCTGCAAGCCCTTCTACTGCGACAGGCCATGGCAGCGGGCCACTGCCCGGGAATCCC  
ACGCCTGCCTCGGTGAGGCCTTGAGGGTGGCCTGGGGACCTTGACACAACCAGCC  
TGCCCTGACCCATCCCTCCCTGCA

>1476

TGCCACTACTGCCGGGAGGGCTTCTATCGAGACCCTGGCCGTGCCCTGAGTGACCGTC  
GGGCTTGACAGGGGTGAGCCACCACCGCCACCTGCAGGCCCTCACCTCTGACTTCCC  
AGATCCCAGACAGGCTTCTGACC

>1477

ACTGGCCTCACCTGCAACCGCTGCGCGCCTGGCTTCCAGCAAAGCCGCTCCCCAGTGG  
CGCCCTGTGTTAGTGAGTGACCCTGCCCGCCTCAGCCACCAAGCCAAGGCCACCCCA  
GCTCCCTGCTGTTGTCCCGTCTAT

>1478

GACTCGCACTGCAAACCTGCCCGTGGCAGCTACCGCATCAGCCTAAAGAAGTTCTGCA  
AGAAGGACTATGGTAGGTGCCCTCAGGCCTCCCGCGGACCTTCCCACCTTCTCCTCT  
CCCTACCTTCCCTCCTCCGCCAGC

>1479

GCGGCGGGTGGCAGCGATCCGCGGGCTGGCGACGTAGAGGAGGACGCCTCACAGCTC  
ATCTTTCCTAAAGGTTGGGCTCGGGGCTGCCAACTCCCCGCGCCACTTCGCGTGGT  
CGCCGAGGCCTGGCGTTATGCGCG

>1480

TGAAAACATTAACACTACACAGCCCGTTTCAGTCGTTTCAAAAACAGAGAGACCATTGC  
CAGTGTTGCTAGGTGAGTGCTAAAAGAAAGTTTTTATTAATCAAACCATTTGGACAACT  
GCATGTAGAATGCTGTCCCCTCC

>1481

AGTTTGAGTTGGCCTGTTTGGCCAACCTTTGCCAGAGACTGCTGAGGAGTCCAAGGC  
TCTAATCCCAAGGTTAGTACCAGTTGTGATAAGTTCTCTGTATACTGGATAAATTCCTAC  
AAATAGAATTGGTGTGTCTAAA

>1482

GCTCCGGGGACACTTTGCGTTCGGGCTGGGAGCGTGCTTTCCACGACGGTGACACGCT  
TCCCTGGATTGGGTAAGCTCCTGACTGAACTTGATGAGTCCTCTGAGTCACGGGCTC  
TCGGCTCCGTGATTTTCAGCTC

>1483

AGGAGCCGCAGTCAGATCCTAGCGTCGAGCCCCCTCTGAGTCAGGAAACATTTTCAGA  
CCTATGGAAACTGTGAGTGATCCATTGGAAGGGCAGGCCACCACCCGACCCCAACC

CCAGCCCCCTAGCAGAGACCTGTG

>1484

CTACCAGGGCAGCTACGGTTTCCGTCTGGGCTTCTTGCATTCTGGGACAGCCAAGTCT  
GTGACTTGACGGTCAGTTGCCCTGAGGGCTGGCTTCCATGAGACTTCAATGCCTGG  
CCGTATCCCCCTGCATTTCTTTTG

>1485

AAGCAGTCACAGCACATGACGGAGGTTGTGAGGCGCTGCCCCACCATGAGCGCTGC  
TCAGATAGCGATGGTGTAGCAGCTGGGGCTGGAGAGACGACAGGGCTGGTTGCCAGG  
GTCCCCAGGCCTCTGATTCCTCACTG

>1486

GCGTGTGGAGTATTTGGATGACAGAAACACTTTTCGACATAGTGTGGTGGTGCCTATG  
AGCCGCCTGAGGTCTGGTTTCAACTGGGGTCTCTGGGAGGAGGGGTTAAGGGTGGT  
TGTCAGTGGCCCTCCGGGTGAGCA

>1487

GTAACAGTTCCTGCATGGGCGGCATGAACCGGAGGCCATCCTCACCATCATCACACT  
GGAAGACTCCAGGTCAGGAGCCACTTGCCACCCTGCACACTGGCCTGCTGTGCCCA  
GCCTCTGCTTGCCGCTGACCCCTGG

>1488

ACAGAGGAAGAGAATCTCCGCAAGAAAGGGGAGCCTCACCACGAGCTGCCCCAGG  
GAGCACTAAGCGAGGTAAGCAAGCAGGACAAGAAGCGGTGGAGGAGACCAAGGGTG  
CAGTTATGCCTCAGATCACTTTTATCA

>1489

GCCCAACAACACCAGCTCCTCTCCCAGCCAAAGAAGAAACCACTGGATGGAGAATA  
TTTCACCCTTACAGGTAAGTCTTGGGACCTCTTATCAAGTGGAAAGTTTCCAGTCTA  
AACTCAAATGCCGTTTTCTTCT

>1490

TGAATGAGGCCTTGGAAGTCAAGGATGCCAGGCTGGGAAGGAGCCAGGGGGGAGC  
AGGGCTCACTCCAGGTGAGTGACCTCAGCCCCTTCTGGCCCTACTCCCCTGCCTTCT  
AGGTTGGAAAGCCATAGGATTCCAT

>1491

TGCGCCTGCTGCTGCTGCTGCGGCCCCGCGCGGCCCTGCGGGCCCCAGAGGCG  
GCCGCCGGGCTGGGTGAGTGGGCGCGGAGCGGGGCGGGGGCCCCGGGAGCCCCG  
GGCGCGGCGCAGTGGGTGCCGAGCTTG

>1492

CCAGTATCCTGACGTGAGTACGCGCGAGCGCCTGGCCGGCCGCATCCGCCTTCGCGAG  
GAGCGCGTGGAGGTGAGTGCCCCGCCAGCCTTCCCCGGAGCGCGGGCCGCGGC  
TAACTGGACTGGGGTCTGGCGGG

>1493

CCCGAGGAGGTGATCGCCACCATCTTTTCCCGCTGGTGGGTCCCTCCCTGCTGCG  
GGACAGCAGCTGGTGTAGTACCCCTCCTGGTTCTTCTGGAAGTAAAAAGGGTGTCTTT  
CGGTTGAAAGTACTTTTCAGCCTA

>1494

ATTTAAGAGAGAATGGGCCAGTGTGCATGCGCTGCATAGCAGTTTTTGGTGGCATTAAAC  
ACGCCAGTGTATCCTTAATTTTCTGTGCTACGTCCAGAGTATCTTCTTAGGTTATATA  
TTGAAGCATTTTGTGTTTGT

>1495

GGCTGGGGATCACCATAGCTTTTCTAGCTACGCTGATCACGCAGTTTCTCGTGATAATG  
GTGTCTATCAGTATACAGTAAGTGTGTGTTTTCAAATATTGGCTTTGGAAAGCTTAGATA  
TTTTCATATTTTATTTGTTT

>1496

TTCTTGGCTCCCTTGATATTTTTCTCAGGAGGCGTCACGGTGGGGAACATAGGACGAC  
AGTTAGCTATGGTAAGTAAATGATCATATTATCTTCTAAAACCTTGCTTCTTTACCTTG  
ATAGAATGACTTTACATGAT

>1497

GGCCGGAAGATGAAACTGAGCTTACCCTACTCTGAATGCAGATGACCAAGAATGCAA  
ACGAAATCTCAGGTGAGCAGTATTTAAGAAGGTCCTGTTGTCAGTTTTTCAGATTTTC  
TTATTCCAAGGCCTTAAACTG

>1498

ACAGAGCACCTGTGGGAGGACTAGGAAAATTAAGATGATTATAGCCAAAAATGGCCC  
AGACACAGAAAGGTAGGTAATTATTAACCTGTGACTGTATACCTACCGAAAACCTTGCA  
TTCCTCGTCACATACATATGAAC

>1499

AGGTCAGGAGGAGACTGTGAGAATTGTTGCTCTGGATCGAAGTTTTACATTGGCTGT  
TACAAGTGCAGGTCAGGGGCCCCAGCACGTGCAAGGGGCTGGCAGTGTCTAGGGT  
GCTGGGTAGAGCATGAGGGGGAACA

>1500

CTGCCCTTCTTCCCGAGAGCCCCAGGTACCTGCTGATTGAGAAGAAAGACGAAGCGG  
CCGCCAAGAAAGGTAACGAGGGCTCTGGCGGGGGCGCCTCCAGGTTCTGCTCCCCA  
GCCCTGGTCCGACGGTGCCGCTTCT

>1501

CTCGCTGCGCTGGCAGCTGCTGTCCATCATCGTCCTCATGGGCGGCCAGCAGCTGTCG  
GGCGTCAACGCTGTATGGGCCGGCTGCGGCTCGGGAGCTGGGGAGGGCTCGGGGGG  
CGCGGGGCGCAGGTCCTGGGGCGCC

>1502

GCCGGAGGAGCAGTGCAGTACGTGACGGCCGGCACCGGGCCGTGAACGTGGTCAT  
GACCTTCTGCGCCGTGAGTGTCTGGGAGCTGCCACAGCCTCCACCAAGGCCCTC  
GGGCCCCACGCCCCAGCCTCGGCGC

>1503

GCTGCTGCTGCTGGGCTTCTCCATCTGCCTCATAGCCTGCTGCGTGCTCACTGCAGCTC  
TGGCACTGCAGGTGAGGACAGGCCAGGGTCCAGGAGCCCGGAGCTGCACCAGGAA  
GACCAGTTGCCCTCCATCCTGCG

>1504

GTGTCCTGGATGCCATACATCAGCATCGTCTGTGTCATCTCCTACGTCATAGGACATGCC  
CTCGGGCCAGTACGTACCCAAAGCTGGCCTCAGGGTGTACAACCCCCCTGGTCCC  
AGAAGCTCCGGGCTGGAGCTCC

>1505

CTTCATGGTGGGGGCGAGTGTGCACTGGCTCTCCAACCTCACCGTGGGCTTGATCTTC  
CCGTTTCATCCAGGTGAGTGGGGCCCGGGGCCACGCTACCACCAGATCCCCATGCAG  
TACAGTGCAGGCCCTGGGCAAAC

>1506

GGCTGTTCTCAGGTATTGGCCTGCACTTGGCAATACATCTGGCTTTGGACCCATCCCA  
GAGCTTCAAAGGTATAGATAGGTAGGGACAGGGAGGGAGAGAAGGGAAAAGCCCTTG

GAGGCCAGAAGAGAAGTCAGATCT

>1507

GATGTAAGGAACTCAAGCTCCCTGGCCGCTGCCCCGGAACGCGTGACCGAGGGCCGT  
GTGGATGTGCTGGGTGAGCCTCCTGGAAGCATATGGGCTCCTAGGAGCCTTCTCCGCC  
CTGCGTTGAAACCAACATGTCCCCA

>1508

TTCCTGCCAGACATGAAGCGGCCGGGTTCCGGGACGCGTGTTGGTGACTGGGAGCATG  
GGAGGATTGATGGGTGAGTGGCAGGGACCGGGCCCCGAGCTCCAGATTCTTTGTGTGC  
AGAGCTGAGCCTTGAAGGCAGGCTC

>1509

GCGCCAGCAAGTTCGCGCTCGAAGGCTTATGCGAGAGTCTGGCGGTTCTGCTGCTGCC  
CTTTGGGTCCAGTGAGTCAACACCCCGTCTCCTCAACCCTCTAACTCTGACCTAG  
AGATGCCGAGCACCTGTCTGCG

>1510

TTATGACCTCACCCGGGAGCGCAAAGCACGCGACATGGTGGGGCAGGTGGCCATCAC  
AAGGATTGAGCAGGTGAGGGCAGGTGGTGCCATCAGGGTGTCCCCCAGCGGGGTTT  
AGGGCTCTGGTTCCTTACAGAACAG

>1511

AGAACCAAGGCTACTATGACTACGTGAAGCCAAGACTTCGGACCACCATCAGCCGCGC  
CAAGCCCGTCTGGTAAGGCTTCAGTCCCTGCCAGGAAGGCTGTGGGACCCTCCCCTCA  
GGCCAGTAGGCAGTTAGCCAGGCA

>1512

ATTGTGGATTTGGTCAAGGAGCTTGACAGAGACACAGTTTTTGCTCTGGTGAATTACAT  
CTTCTTTAAAGGTAAGGTTGCTCAACCAGCCTGAGCTGTTTCCCATAGAAACAAGCAA  
AAATATTTCTCAAACCATCAGTT

>1513

AACTACAGCACCTGGTAAATGAACTCACCCACGATATCATCACCAAGTTCCTGGAAAAT  
GAAGACAGAAGGTGATTCCCCAACCTGAGGGTGACCAAGAAGCTGCCACACCTCTT  
AGCCATGTTGGGACTGAGGCCCAT

>1514

CACTAAGGTCTTCAGCAATGGGGCTGACCTCTCCGGGGTCACAGAGGAGGCACCCCT  
GAAGCTCTCAAGGTGAGATCACCTGACGACCTTGTGACCATGGTATCTGTAGGG  
AAGAATGTGTGGGGGCTGCAGCACT

>1515

GGCCGGCTTCGCGGGCGACGATGCCCCCGGGCCGTCTCCCTCCATCGTGGGGCGC  
CCCAGGCACCAGGTAGGGGAGCTGGCTGGGTGGGGCAGCCCCGGGAGCGGGCGGGA  
GGCAAGGGCGCTTTCTCTGCACAGGA

>1516

CGAGGAGCACCCGTGCTGCTGACCGAGGCCCCCTGAACCCCAAGGCCAACCGGA  
GAAGATGACCAGGTGAGTGGCCCCTACCTCTTCTGGTGGCCGCCTCCCTCCTTCT  
GGCCTCCCGGAGCTGCGCCCTTCT

>1517

GGCCAGGTCATCACCATGGCAATGAGCGGTTCCGCTGCCCTGAGGCACTCTTCCAGC  
CTTCTTCTGGGTGAGTGGAGACTGTCTCCCGCTCTGCCTGACATGAGGGTTACCC  
CTCGGGGCTGTGCTGTGGAAGCTA

>1518

GTACCCTGGCATTGCCGACAGGATGCAGAAGGAGATCACTGCCCTGGCACCCAGCAC  
ATGAAGATCAAGGTGGGTGCTTTCTGCCTGAGCTGACCTGGGCAGGTCAGCTGTGG  
GGTCCTGTGGTGTGTGGGGAGCTG

>1519

AGCTGGTTTTGCTGGGGACGACGCTCCCCGAGCCGTGTTTCTTCCATCGTCGGGCGC  
CCCAGACACCAGGTGAGTGGATGGCGCCGCGGGGCTCCTGGGTTCTGCGTTGCGGGG  
TGGGTTCCGGTGTGCGCCGGCGAGGCT

>1520

GGAGGAGCACCCAGTGCTGCTGACCGAGGCCCCCTGAACCCCAAGGCCAACAGAG  
AGAAGATGACTCAGGTGAGGCTCGGCCGACGCCGTGCTCCTCCGTCCTTTCCCAG  
TCATTTTCTCGCCGGCTTGATTTCT

>1521

GGCCAGGTCATCACCATTGGCAATGAGCGTTCCGGTGTCCGGAGGCGCTGTTCCAGC  
CTTCTTCTGGGTAGGTGTTGTGAGCTAAAGTTTTCTACTTTTCATCCTCGGTGACA  
CAGCATCACTAAGGGAGGGCTCT

>1522

GTACCCGGGCATTGCCGACAGGATGCAGAAGGAGATCACCGCCCTGGCGCCAGCAC  
CATGAAGATCAAGGTGAGTCGAGGGTGGTGGCCCTCTGCCTGGCTCGGGAGAGCT  
GACTGGGGGGCGCTCTGCGAGCTGAA

>1523

TTGGCATGGACAAGCCGCTCACCTTCCAGACTTCTGGCCAAGTTTGACTACTACATG  
CCTGCTATCGCGTGAGTTGCCCAACCCACAGGTCCTAGGGCAGCATTGATCCCTATG  
ACTAGGACCAGGCCTGTCCCTC

>1524

TGGAGGTGCGGTACAGTCCGCACCTGCTGGCCAACCTCAAAGTGGAGCCAATCCCCTG  
GAACCAGGCTGAGTGAGTGATGGGCCTGGAAGGGCCATGCTGAGGGTGTGGCTGGG  
AGGCTCAGCTCTGAGACTGGAAGGG

>1525

CTGCAGGAGGGGGAGCGAGACTTCGGGGTCAAGGCCGGTCCATCCTGTGCTGCATG  
CGCCACCAGCCCAGTGAGTAGGATCACCGCCCTGCCAGGGCCGCCGTCTCACCTG  
GCCCTGACCTCCTGGCCTAGCAGTG

>1526

CATTGACCTGGCTGGAGATGAGACCATCCAGGAAGCAGCCTCTTGCCTGGACATGTC  
CAGGCCTACCAGGTGGGTCTGTGAGAAGGAATGGAGAGGCTGGCCCTGGGTGAGCT  
TGTCTCCACCCATAGTTGGGAGAA

>1527

GGCTGTGAAGAGCGGCATTACCGTACTGTCCACGCCGGGGAGGTGGGCTCGGCCGA  
AGTAGTAAAAGAGGTGAGGGCCTGGGCTGGCCATGGGGTCCCTCCTCACTGCCTCCTC  
CCATACTGGCTCTATTCTGCTTCT

>1528

ACACGGCTACCACACCCTGGAAGACCAGGCCCTTTATAACAGGCTGCGGCAGGAAAA  
CATGCACTTCGAGGTAAGCGGGCCAGGGAGTGGGGAGGAACCATCCCCGGCTGTCCC  
AACTTCTGTATAGAGAGGCAGAAAG

>1529

CACCTGGACTGATTACCAGATGACCAAACGGGACATGGGCTTACTGAAGAGGAG  
TTTAAAAGGCTGGTGAGTGGGTGTGAGCCATACTGGCCTTACTCGGGTTTGGGAGTA

TGGTATCTACAGGTCCAGTCCGGG

>1530

GAAGATGAAAAGAGGGAGCTTCTCGACCTGCTCTATAAAGCCTATGGGATGCCACCTT  
CAGCCTCTGCAGGTAGGTTCTGTCTGGGCTTCTGGGCAGTTGCCTGCTCTGGCCCCA  
GTGTGGCTTTCTGTGGGACTTCTA

>1531

AATTTGTGACTCACAATCTGTCTTTTGATGAAATCAACAAAGCCTTTGAACTGATGCAT  
TCTGGAAAGAGGTAGGCTTTCTCTTTATATATCATAGAATGTAATAATGATGTTGAGTTT  
GAGGGGATGGAGAGTCGAAAA

>1532

TCAATTTTTTAATTTTCTACTAAATTTTACTGAATCCAGAACACTGCATAGAAATGAA  
TATGGAATAGGTGAGATATTTGTGTTTTCTTGTCTTTTCTCTATATCAAAATTTTTTAA  
ATTATAAAATTTGCATTAA

>1533

GAAAGATGCATTGACTGCAATTGAGAAACCCACTGGAGATGAACAGTCTTCAGGGTGT  
TTAGAAAACCCAGGTGAGTGAATAATTTAAAAAAGCATTGTGATATTTGACAAAAATTT  
AGCATGCTGAAGAGAAGATACAA

>1534

TTTTCCAAGTTCAGAACCTGTCACAAGCTGTGAAGCATATGAAGAAGACAGGGAGA  
CATTATGAACAAGTAAGGATCCAGTTTAAAGGTAGATGCAAACCTCAGAAACACAGC  
AATGGCAAGCCTAATTTAGTATTTT

>1535

TGCTCGCTATGACAAAATAATTCCATCTTGCTGCAAAGCTGAAAATGCAGTTGAATGCT  
TCCAAACAAAGGTATCATATTTGCGTGGATATCTGAACCAGTACTGTAGTCTATGACTCA  
TTAAAACAAAACAAAGTTAAA

>1536

AAAGCAGCTTGTTAAATCAACATGCATGTGCAGTAATGAAAAATTTGGGACCCGAAC  
TTTCCAAGCCATGTAAGTCAAGTTCTATCTAGGGAAGAGGGTGAGAGCTACAGAACT  
ACCATTTTGCAATTTGGGTTTCGTT

>1537

AGTCCTGGATGTGGCCCATGTACATGAGCACTGTTGCAGAGGAGATGTGCTGGATTGT  
CTGCAGGATGGGGTGAGGAGTCTTGCTTCTTAAATAGAAGATTTTCACTCCCTTTTCT  
TTCTTTTTGTCTCATTCTAAAAG

>1538

TAAACAGGTTTTTAGGAGATAGAGATTTTAAACCAATTTTCTCAGGGGAAAAAATATC  
TTCTTGCAAGGTAACACACTCTGTAAATGCATGTTTCATGCAAGTAAAAATGATTATGT  
GGCTGACAGATTTGCGTTGTTG

>1539

TAAAGGATACCAGGAGTTATTGGAGAAGTGTTCAGACTGAAAACCCTCTTGAATGC  
CAAGATAAAGGAGTAAGTTGCTCTAGAATTTAGGGGAGTATGAAAACTGGATTGATA  
TCATCTGTAAAAATGCTGTTTG

>1540

AGAGCCAAGCATTGGCAAAGCGAAGCTGCGGCCTCTCCAGAACTAGGAGAATATTA  
CTTACAAAATGCGTATGTTTTGTAAACAGTATTTTAGTGAATTAATTAAGAG  
AATGTAGCCTTCCCAATTCTC

>1541

AATGGCAGCCACAGCAGCCACTTGTGGCCAACTCAGTGAGGACAACTATTGGCCTGT  
GGCGAGGGAGCGGTGAGTGTCTGCTTGGTTTGGTCCCATCTCATTCTGCCCTGTTGA  
CTTGAAATAGCCTCATAATTCCC

>1542

ATGACAAGTTCATTTCCATAAGGATCTGTGCCAAGCTCAGGGTGTAGCGCTGCAAAC  
GATGAAGCAAGAGTAAGAACTGTTACTTGCTAGCATGGAAAAGAATGACAACCCCA  
AAGAGTAACTGAGACTTCTACCTCG

>1543

TGCAGATTTCTCAGGCCTGTTGGAGAAATGCTGCCAAGGCCAGGAACAGGAAGTCTG  
CTTTGCTGAAGAGGTACATGCAGCTCATTTCATACTCAAATACTTGCTATGGAATTTT  
TG TAGTGATAATGAAAGGAAGA

>1544

GCTGATACACGCAGACCAGATCTGGTCAGGTCCTCGGAAGCTGAGTCCAGAGCGATGC  
TGCTGAAGACAGGTACCTACACCGGCTGGGGTGGCTTGGAAAGGGTAGGGGTGAGTGC  
TACAAGGAGTGCTTTGGCCCTTCTT

>1545

TGGGCTGGCTGGCCTGGGAACGCTTCCGCTGCAACATTAAGTGTGATGAGGACCCAAA  
GAACTGCATAAGGTGAGTAAGGTCCACACTCACCTGATGAGCCTTGCCAGGGCCCTG  
CAGATTCGGGGGCAGGAAGTGGAG

>1546

CGATGCCAGTGGCCGCTGATGCCAGATCCCAAGCGCTTCCCTCATGGCATTCTTTCC  
TGGCTGACTACGTGAGCCGACCCAGCCCTGCCCTTGCCTCAGGGCTAGACCACTCC  
TTTACCCTACCTCGCTTAGGGC

>1547

TTCGCCGAGTGGAAGGTAGACATGCTCAAGCTGGATGGCTGCTTCTCCACCCCGAGG  
AGCGGGCCAGGGTGAAGTACGCAGCTGGCTGGGGCACGTAGGCAAACGGGGAGGG  
TGGCCATGGAGACCCACCCAGCGCCC

>1548

GAATGCCACAGGCCGCCCATCGCTTCTCCTGCAGCTGGCCAGCCTATGAAGGCGGC  
CTCCCCCAAGGGTAAGCATTCTCCCCCTGCCTGATGGCGCTTCCACACCCAGGC  
CTCCTTACCTCCTGAGTGCCAGGC

>1549

TTGTTTCGTGGAGCACCAGGACATACTGCAGCCAGTGGCCGGCCCTGGGCACTGGAAT  
GACCTGACATGGTACCAGGATGGAGGGGGATGTCCTAGGCCACCATCTGTGACGAC  
CCTGCTCCCCACTGCCCTGTGCTT

>1550

TCTGCAGAATCCACTCATGATCAAAATCAACCAGGATCCCTTAGGCATCCAGGGACGC  
AGGATTCACAAGGTACTAGGGTGTGGAGGGAAGGAAGGGGAGGGCTGAGGAACTGG  
GTTCTCCTGAGAGAAAGGCTGCCAGC

>1551

GACCGATATGCCTTATCGCTACCACTCCTCCCTTGGCCAGCTGAACTTACCGGGTCTG  
TGATATATGAGGTGAGCACCCGGCTGCCTGCCAGCCGCTGGGCTTCAATTTCTGTGG  
GAGGGTATTATGGGGGGTGGTT

>1552

GGTCAGCTCAGGCTCGGCCAGGGGCAAGAAGCTGTCGAAATCATGGAGAAGGGGCA  
GCTGGTTCCACTGGTGAAGTGGGCCCTGGTGGGGTGAGAGGCAGGGGATGACAGTAGC



CCTGAGTGGGTGTCCCACCAGCAGCA

>1553

TACTTCAAAGGCTTCTGATTGATGGCTACCCGCGGGAGGTGCAGCAAGGAGAAGA  
GTTTGAGCGACGGGTAAGGCACTGACCCAAGTGGGGATCCTGGTGGGCTGGGGCAGG  
ATAAGACTCCCATCCCCATGGGCGGG

>1554

GCTGGAGACCTATTACAAGGCCACAGAACCCGTCATCGCCTTCTATGAGAAACGTGGC  
ATTGTGCGCAAGGTGGGCCCCGCGGGACGGGGCAGCTCCGGAAGAACGGGTTCTTA  
TGTGGCTCCGCCTCAGCTACTGTG

>1555

TTGTGCTGCTATCTACGGCAATGAGCCTGAGATTGGGGAGGCCCTGAAGGAGGACGTG  
GGACCAGGCAAGGTAAGGACTGGGGTTGTAAATAGAGGTGGATAAGAGAACTTAGAA  
GCTGAAGCTAGGCTGGGGCCAGCT

>1556

GGAAGACTCTGGCTGACCTCCAGCTGGAGTATCTGGACCTGTACCTGATGCACTGGCC  
TTATGCCTTTGAGTGAGCCTTGCCAGAGCCTCATCTGGGAATCAGGGGGTTGAGCAG  
GATGGTGTTAGTAACTTATTGTAA

>1557

GTCCAACCTCAACAGTCGGCAGATTGATGACATACTCAGTGTGGCCTCCGTGCGTCCA  
GCTGTCTTGCAAGTAAGACAGCAAGCAGATGAGTGGTTTAGGGGTTGTCTGCTCAAGA  
GCATGAGGGAGCAGACGATGGATC

>1558

TGCTGGAGGAACCAAGTAGTCTGGCATTGGCTGAAAAGTATGGCCGATCTCCAGCTCA  
GATCTTGCTCAGGTATGGGGCAGTCTTAGGGAGAGGGCCCTGGGTTGGGAGGCAAGG  
GTTAAGGGATTCTTATTTAGTGT

>1559

GCAGGTCCAGCGGAAAGTGATCTGCATCCCCAAAAGTATCACTCCTTCTCGAATCCTTC  
AGAACATCAAGGTACTTGGAATGGGTTCTATCTTACTTTAGCTCTTGGGACATTTTCT  
TGGCCCTGACTCTACCTGGCT

>1560

TAGCCAGAAGAGATGAAGCAGCTAAATGCCCTGAACAAAATTGGAGATATATTGTG  
CCTATGCTTACGGTGAGGATGTATCAGCCTCCTAGACTTGGGGAATGTGAGATTTGGGG  
TGGGATTCTGGCCAGGTGTGAC

>1561

AACTGCCGGCATCTGAGGTTTCTCCAAGGCCCTCTGAAGTGCAGCCCATAATGAAGG  
TCTTGGCGGCAGGTAATAACACCCGCCCCGCGCCGGCTTCGCGTCCCCGCTGCGGGGC  
GCGGCGGCAACTTGGGGCGCTTGG

>1562

CCTCATGAACCAGATCAGGAGCCAACCTGGCACAGCTCAATGGCAGTGCCAATGCCCTC  
TTTATTCTCTATGTAAGTTACCCTGGGATACTGACAGGAGATGGCAGGGAGGGGGCTT  
GTAAATATCATTAGGGGCTGTCC

>1563

GACATGCAGGGGCCCTGGGTGCTGCTCCTGCTGGGCCTGAGGCTACAGCTCTCCCTGG  
GCATCATCCCAGGTAATGAGGCTCCCCAGCCTGCCCTACACACACACACACACACA  
CCACCCCCAGCCCAGGCTGACCT

>1564

CTGGGTGCCGCAAGAAGCTGCAGCCTGCACAGACAGCCGCAAGAACCTCATCATG  
TTCCTGGGTGACGGTGAGTGAGCCAGCCTTCAGCCCCGAGCCCTCACAGCCCCGG  
CGCCCCGACCCTCAGTGGTTCCAGGA

>1565

GAAGAAGGACAAACTGGGGCCTGAGACCTTCCTGGCCATGGACCGCTTCCCGTACGT  
GGCTCTGTCCAAGGTAAGTGCTGGGCTACCTTAGAGTCCTCCAAGCAGAGAAGGGGA  
ATCCTGGCTATGGAGTGTGGTAGGAG

>1566

CGCTTTAACAGTGAACACGACACGCGGCAACGAGGTCATCTCCGTGGTGAATCGGG  
CCAAGAAAGCAGGTGGAGCTGGGGCCCGGCTGTGGGGTCAGGGCCAGTGACAGACC  
TCTATCGCATATCCTGACCTCTATCA

>1567

GCCTGCCTCGGCCCCAGGAGGGGTGCCAGGACATGCCACGCAGCTCATCTCAA  
CATGGACATTGATGTGCGACCCCCGGGCAAGGGTGGGGCTGGGCAGAGAGTAGCAG  
GGAGGGGGCACCAGCTCAGACCAGGC

>1568

TGACTACAGCCAAGGTGGGACCAGGCTGGACGGGAAGAATCTGGTGCAGGAATGGCT  
GGCGAAGCACCAGGTGATGGGGGCTGGTGGGTGTGCTGGGCACAGCAGGGGGAGGG  
CAGAGGTGTGGGGCTCGGGGCTGTGGG

>1569

GCCCCGTACGTGTGGAACCGCACTGAGCTCCTGCAGGCTTCCCTGGACCCGTCTGTGA  
CCCATCTCATGGGTAATGACCCCTTCCTGCCCTGGCATCCTCAGATGGCCTCAGATGG  
CACTTCTGAGCCTGTGTGCACAT

>1570

ATGGAGATGACAGAGGCTGCCCTGCTCCTGCTGAGCAGGAACCCCCGCGGCTTCTTCC  
TCTTCGTGGAGGGTGCGTGGTGGCCCTGGGAGTGGGGGGTTGGGGGTTGGAGCAGGG  
CAGGCTCAGCATCTCCCCCTCTGG

>1571

CTCGTCACTGCCGACCACTCCCACGTCTTCTCCTTCGGAGGCTACCCCTGCGAGGGA  
GCTCCATCTTCGGTAGGCCTGGGGATGAGTGGCAGGTGCTGCTGCAGCAATTAAGTGG  
GTGAAATCTGAGCCTCAGTCTCCT

>1572

CTATACGAAACGGTCCAGGCTATGTGCTCAAGGACGGCGCCCGCCGGATGTTACGG  
AGAGCGAGAGCGGTGAGTGCCGTGGGGTGGCCTGAGGGGGACCAGGGTGCCAAGGA  
TGGGGGGCTGGCGGGAAGGGGTCACC

>1573

GACATGCAGGGGCCCTGGGTGCTGCTGCTGCTGGGCCTGAGGCTACAGCTCTCCCTGG  
GCGTCATCCAGGTAATGAGGCTCCCAAGCTGTTCCACACACAGGGCACCCCTCAG  
CCAGGCTGACCTGATCTCTACTCT

>1574

CTGGATGCTGCCAAGAAGCTGCAGCCCATCCAGAAGGTCGCCAAGAACCTCATCCTCT  
TCCTGGGCGATGGTGAGTGAGCAAGGCCTGTCCAGCCCCGTAGTCTCACAGCCCCGG  
CACCCGGGACCTTCAGTGGTTCCA

>1575

GAAGAATGGCAAACCTGGGGCCTGAGACGCCCTGGCCATGGACCGCTTCCATACCTG  
GCTCTGTCCAAGGTAAGGGCTGGGCCACCTCAGAGTCCTCCAAGCAGAGGAGAGGGA

TCAAGGATATGGAGTGTGGCAGGAG

>1576

CGCTTTAACCAGTGCAACACGACACGCGGCAATGAGGTCATCTCCGTGATGAACCGGG  
CCAAGCAAGCAGGTGAGCTGGGGCCCGCTGTGGGGTCAGGACCAGGCCCAAGATCTC  
GGTCACCGATCCTGACCTCTGTAC

>1577

GCCTGCCTCAGCCCGCCAGGAGGGGTGCCAGGACATCGCCACTCAGCTCATCTCCAAC  
ATGGACATTGACGTGCGACCCCGGGCCAAGGGCTGGGGCTGGGCAGAGGGGAAGGT  
GGCACAGGCTCAGATCCAGGCAACC

>1578

TGATGCCAGCCAGAATGGAATCAGGCTGGACGGGAAGAACCTGGTGCAGGAATGGCT  
GGCAAAGCACCAGGTGATGGGGGCTGGTGGGTGTGGGAGGCACGGCAGGGGGAGGC  
CAAGTGTGTGGGTCTCAGGGCTGTGGG

>1579

GCCTGGTATGTGTGGAACCGCACTGAGCTCATGCAGGCGTCCCTGGACCAGTCTGTGA  
CCCATCTCATGGGTAATGACCCCTTCTGCCCTGGCATTCTCAGACAACCTCAGAGG  
GTGCCATCCGAGCCTGTGTGCC

>1580

ATGGAGATGACAGAGGCTGCCCTGCGCCTGCTGAGCAGGAACCCCGCGCTTCTACC  
TCTTTGTGGAGGGTTCGTGGTGGCCCTGGGGAGTGGAGGAAGGCGGGGCGCGGCAG  
GGCAGGTTCAAGCATCACCCCTC

>1581

CTCGTACCGCTGACCACTCCCATGTCTTCTCCTTTGGTGGCTACACCTTTCGAGGGAG  
CTCCATCTTCGGTAGGCCTGGGGAGAGTGGCAGGTGCTGCTGCATCAATTATGAGGGT  
GAAGTTTGAGCCTCAGTTTCTC

>1582

CTGTACGGCAATGGCCCGGGCTACGTGTTCAACTCAGGCGTTCGACCAAGACGTGAATG  
AGAGCGAGAGCGGTGAGTGAAGGCTGAATGGCCGTGCAGGGGGACCAGGGTGCCAG  
GGATGGGGGCATTTCGCGGGAGGGGGA

>1583

GGGCCCTGCATGCTGCTGCTGCTGCTGCTGCTGGGCCTGAGGCTACAGCTCTCCCTGG  
GCATCATCCAGGTAATGAGGCTCCCGAGCTGCCCTACACAACACACACAGGGC  
ACCCCCAGCCAGGCTGACCTGA

>1584

CTGGGTGCCCAAGAAGCTGCAGCCTGCACAGACAGCCGCAAGAACCTCATCATC  
TTCCTGGGCGATGGTGAAGTGAAGCAGGCTTCCAGCCCTGCAGCCCTCACAGCCCCGG  
CGCCCGGACCCTCAGTGGTTCCAGG

>1585

GAAGAAGGACAAACTGGGGCCTGAGATACCCCTGGCCATGGACCGCTTCCATATGTG  
GCTCTGTCCAAGGTAAGTGTGGGCTACCTTAGAGTCTCCAAGCACAGAAGGGGAAT  
CCTGGCTATGGAGTGTGGTAGGAG

>1586

CGCTTTAACCAGTGCAACACGACACGCGGCAACGAGGTCATCTCCGTGATGAATCGGG  
CCAAGAAAGCAGGTGAGCTGGGGCCCGCTGCTGGGTACGGCCAGGTCACAGACGTT  
GGTCACATATACTGACCTCTGACAC

>1587

GCCTGCCTCGGCCCGCCAGGAGGGGTGCCAGGACATCGCTACGCAGCTCATCTCCAAC  
ATGGACATTGACGTGCGACCCCAAGGACCAAGGGCTGGGGCTGGGCAGAGAGTAGCA  
GGGAGGGGGCACTAGCTCAGACCCA

>1588

TGACTACAGCCAAGGTGGGACCAGGCTGGACGGGAAGAATCTGGTGCAGGAATGGCT  
GGCGAAGCGCCAGGTGATGGGGCTGGCGGGTGCAGGGGGCACAGCAGGGGGAGGG  
CAGAGGTGTGGGGCTCAGGGCTGTGGG

>1589

GCCCCGTACGTGTGGAACCGCACTGAGCTCATGCAGGCTTCCCTGGACCCGTCTGTGA  
CCCATCTCATGGGTAATGACCCCTTCTGCCCTGGCATCCCTCAGATGGCCTCAGATG  
GCACCTTCTGAGCCTGTGTGCAC

>1590

ATGGAGATGACAGAGGCTGCCCTGCGCCTGCTGAGCAGGAACCCCGCGGCTTCTTCC  
TCTTCGTGGAGGGTGCCTGGTGGCCCTGGGGAGTGGGGGTGGGGGTGGAGCAGG  
GCAGGCTCAGCATCTCCCCCTCTG

>1591

CTCGTCACTGCCGACCACTCCACGTCTTCTCCTTCGGAGGCTACCCCTGCGAGGGA  
GCTCCATCTTCGGTAGGCCTGGGGAGAGTGGCAGGTGCTGCTGCAGCAATTAAGTGGG  
TGAAATCTGAGCCTCAGTCTCCTC

>1592

CTATACGGAAACGGTCCAGGCTATGTGCTCAAGGACGGCGCCCGCCGGATGTTACCG  
AGAGCGAGAGCGGTGAGTGCCGCGGGTGGCCCCCTGAGGGGGGACCAGGGTGCCA  
AGGATGGGGGGCTGGCGGGAAGGGGT

>1593

GGATTTCCTTCAGAAAGGGCTAATGATCTCACTGTCTACAGATGACCCAATGCAATTCC  
ACTTTACCAAGGTATAGTATGGACTTGGGCAATACAAGCATATTTGCTGGACTGTTGTT  
TCCCGTCCAGAATTTGAAAGT

>1594

CAAGCTGAGCACCTGTGATATGTGCGAAGTGGCAAGGAACAGTGTCTTGCAGTGTGG  
AATTTCTCATGAGGTAGACCTGTCTTCAAATGGCTTCCCTTCTGAGTATAGGGTCTGCTA  
ACTTGAATACCGAAAAAGTAGTT

>1595

GCTCCTAGGTGAGACCAGAGCTAATCCCATGTACAATGCCGTGTCCAACGCAGACCTG  
ATGGATTTCAAGGTAGGGCCAGGAAAGCGGGTGCAGTCTGGGGCCAGGGGGCTTTCT  
GATGCTGTGCTCACTCCTTGTGATT

>1596

AGGTGGAGTGGCCGAGCCATCTCCAAGACGGCGGTAGCGCCATCGAGCGGGTCAA  
GCTGCTGCTGCAGGTACGTCTGGGATCCAGAGCCCAACCAGGAAGTGGGGGAAGGGT  
CGCACAGAAGGCGGGCGCCGAGGGGT

>1597

TTTAACGTGTCTGTGCAGGGTATTATCATCTACCGAGCCGCTACTTCGGTATCTATGAC  
ACTGCAAAGGGTAAGTTTGTGTTGCTTAAACGTTGTGTTCTTAGGAGACAGTTTAA  
AAGAGCATTGTACCAACCTAAC

>1598

GCCGGGTTGACTTCTATCCATTTGACACCGTTCGCCGCCGCATGATGATGCAGTCAGG  
GCGCAAAGGAAGTAAGTTCCACTTGAGACAGAAGACAAAGTTGTAGTCGTGGGGCAA

TCTGCTGCCACAACTGGTGATAC

>1599

GCCAGCTGAGCAACAATGCCAAGGAGGCCGTGGAACATCTCCAGAAATCTGAACTCA  
CCCAGCAACTCAAGTAAGAGGGACTACAGTGTGTGGTGGTGACGGGAATTCTTAAA  
GGCCATGCAATGTACTGGCAAGGGTT

>1600

ACACACTGGAGGACAAGGCTCGGGAACATCATCAGCCGCATCAAACAGAGTGAAC TTT  
CTGCCAAGATGCGGTTAGAACCCTTCCCAGGGCACGGGAGAGCTGGGGTGTGTTTTTG  
GGTGGAGCCCTGGCAGATGGTCCAA

>1601

AGACCCTGGAGGACTACACTCGGGAATTCATCAACCGCATCACACAGAGTGAAC TTTCC  
TGCCAAGATGTGGTTAGAACCCTTCCCAGGGCACGGGAGGGCTGGGGTGTGTTTGTGT  
GGAGCCCTGGAGGATGTCCAAGAT

>1602

GCTGGGTGCAGACACTGTCTGAGCAGGTGCAGGAGGAGCTGCTCAGCTCCCAGGTCA  
CCCAGGAACTGAGGTGAGTGTCCCATCCTGGCCCTGACCCTCCTGGTGGGCGGCTA  
TACCTCCCAGGTCCAGGTTTCATT

>1603

CCGAGCTGCAGCTGGTTGAGCAGCGGATCCGCAGCTTCCCCGACTTCCCCACCCAGG  
CGTGGTATTCAGGTGCACGCACAGGCCGCCCTCGTGGCCCCGACCTGCGGGCCTACGG  
ATGGGAGCGCGTGCCCCGACCTC

>1604

GCTCATCCGAAAGCGGGGAAGCTGCCAGGCCCACTCTGTGGCCTCTATTCCCTG  
GAGTACGGGAAGGTAAGAGGGCTGGGGTGGCCGGAGGAAGGGCAGGGTCGGGTAC  
CGTGACCACTCTCCCCAGTTCTAAA

>1605

GAGATTCAGAAAGACGCCCTGGAGCCAGGACAGAGGGTGGTCGTCTGGATGATCTG  
CTGGCCACTGGTGGTAAGGGTCTCCCCGCAGCCA ACTCTGTGCTCCAAGGGCCTGGTG  
GGAGTGGGACAGGACCTCGCTGTGT

>1606

GCTTGGGATCCTCCTGGTGACCTCTCCCGCTAAGGTCCCTCAGCCACTTGCCCCAAGA  
TGGGCCGTGGGGTGAGTATCCCTAAAGAGCAGGGGTGCGAGTCTAGAGGGTGAGGGA  
GGCTGCTGAGGAAGGATGAAGTGG

>1607

AGAGAATGGGGGCGGCAAGAAGAAACAGAAGGAGAAGGAACTGGATGAGCTGAAGA  
AGGAGGTGGCAATGGTGAAGGAACTGCTGGCCATGGAGGAGGGGCCCATGCTGGG  
AGAGCTGTCCCTGCAGCCCATTGCACT

>1608

TGGGGCTATCCTCTGCTTCTGGCCTACGGCATCCAGGCTGCCATGGAGGATGAACCAT  
CCAACGACAATGTGAGCCACACGCCTGACCCGGGAACAGCCCGTGACTGTCCTCCA  
ACCCTGAACCCCCAACACAGTGGG

>1609

CTGCTTCTCCTACTACCAGGAGGCCAAGAGCTCCAAGATCATGGATTCCTTCAAGAAC  
ATGGTACCTCAGGTAAGATGGCAGGGCTGGGGCTCTGGGCTAGGCTGTAAGGTTTTGGC  
AAGAGTCCAGCTCATCTTCTGTCA

>1610

CCTGGTGGAGGTGAAGGGTGGAGACCGCGTCCCTGCTGACCTCCGGATCATCTTCT  
CATGGCTGTAAGGTGAGGAGTCATACCAGAGCAAGCAGTTGAGTCTAAGGAGAAGG  
CTGTGTGCAGAGCTGAGAGGGGCC

>1611

CCCGAGTTCACCCATGAGAACCCCTGGAGACCCGCAATATCTGTTTCTTCCACCAA  
CTGTGTTGAAGGTGAGAAGCCAGGCTGCCCCCTGTAGGAAAGAGTCTGAATCCTGAAT  
CCATAGTCAGGATGAAGGGCTT

>1612

GGAGGCAGTCATCTTCCTCATCGGCATCATAGTGGCCAACGTGCCTGAGGGGCTTCTG  
GCCACTGTCACTGTGAGTGGGTGAGGCTGAGGTGCCACCAGGGGAGGGTCTCACTAC  
TCTTTCCTCAGAGTGATAGAGGCAC

>1613

CGCATGACCGTCGCCACATGTGGTTCGACAACCAAATCCATGAGGCTGACACCACCG  
AAGATCAGTCTGGTGATTGGGTGCTCCAGAGGGGTGGATAGGATTAGAGGAGGCTGA  
GGGCAGTGGCGTGGTGGGGTGAGT

>1614

GTCTCGAATTGCTGGTCTCTGCAACCGCGCCGTCTTCAAGGCAGGACAGGAGAACATC  
TCCGTGTCTAAGGTAGGGGGTCCAGGACACACACCAGGTATGTTTGGGGGTGTCTCCA  
AAGCCTCTTGCTGGCCCCAGCTT

>1615

AGTGAGGAAAATGAGAGACAGAAACCCCAAGGTGGCAGAGATTCCTTCAACTCTAC  
CAACAAGTACCAGGTCTGCTTGGGTTGCCAGGACAGAGGAAGAGAGAGGGATATAAA  
TGGGTGAGGGTGGACAAAGCCAAGGG

>1616

GACAAGGAGATGCAAGATGCCTTCAAATGCCTACATGGAGCTGGGGGGACTTGGG  
GAGCGTGTGCTGGGTGAGAGGCCAGAAACAGGAGGCTCAGAAGGGGATCCCAAGC  
CTCTGCGGCATCCCTGGGGTGGGGGAC

>1617

GTCTATGATTGACCCTCCCCGGGCTGCTGTGCCAGATGCTGTGGGCAAGTGCCGAAGC  
GCAGGCATCAAGGTACTGGCCTCCCATCCTCCCCTCCATTCTAGCCTCCCCATGCCAG  
AGTTCAAGGAGCTGCAGTGGCTG

>1618

CAGAGGGTAACGAGACTGTGGAGGACATTGCAGCCCGGCTCAACATTCCCATGAGTCA  
AGTCAACCCAGGTGAGGCCTCTGCAGGAAGCCCCTGTGCCCTAATCAACACGTCTC  
TTGCACAGAAGGCTTGGGTGTCCC

>1619

CACAGAGATCGTCTTTGCTCGAACGTCTCCCAGCAGAAGCTCATCATTGTGGAGGGA  
TGTCAGAGGCAGGTGAGCACAGCCACGGGAGGCAGATGACAGGCAGGGACCGGGGA  
GGCAGGGACAGGGCCAAGACAAGCAT

>1620

TCTAAGCAGGCAGCCGACATGATCCTGCTGGATGACAACCTTGCCTCCATCGTCACGG  
GGGTGGAGGAGGGTGGAGGCTGCATGGGTTGGGATGGTTTGCAGGATACTGAAGC  
CGGCACCTCTGTTCCCTGTCCCTT

>1621

CATCATTGCCAACATCCCCTACCTCTGGGCACTGTGACCATCCTTGCATTGACCTGG  
GCACAGATATGGTGAGCGCAGGAGGTGGAGGAGGGGACAGGCAAGGCAATCGTGATG

GCACAGTGGCAGGGAGGAGAGGTG

>1622

CAGCCACGAAACTCCCAGACGGACAAGCTGGTGAATGAGAGGCTCATCAGCATGGCC  
TACGGACAGATCGGTGCGCCAAGCCCCGGCCTCGGGAGGGAACCCCAACAGGGTTC  
TTTTCCAGCTTTCAGAGGAATGAGC

>1623

ACTGGAATCCGCCTCGACTGGGATGACCGGACCATGAATGATCTGGAGGACAGCTAT  
GGACAGGAGTGGGTGAGTGGTGCTGTGTAAACACAGCGCACATGTGTGAAGGTACGG  
GAAGCTGAATGCCTGGCAGGAGTGG

>1624

TGGTGGTGCAGTGGGCTGACCTCATCATCTGCAAGACCCGCCGAACTCAGTCTTCCA  
GCAGGGCATGAAGTGAGTGCCACCCCATGGCACCTACCCACCCAGGCTCTGGGCAC  
ACTACCAACCCACACAGGCCAAG

>1625

AGACGGCGTTGGCTGCCTTCTCTTACTGCCAGGCATGGGTGTAGCCCTCCGCATG  
TACCCGCTCAAGTGAGTGTCTTTTCGGGCGCCTGAGTAGTCATACGGGGGGCCTTC  
AGCCCCCTCCAGGATCCAAGTTC

>1626

TTCCCTACAGCCTCCTCATCTTATCATGATGAGGTCCGAAAGCTCATCCTGCGGCG  
GTATCCTGGTGGTAAGCCCCTCCACATTCCCCCAGCAAAGTGCAAGCCCCACCACCA  
GTCCTCCCTCCAGGACCACACG

>1627

GTGCCGACGCCATCCTGATCTGGGTGTATGATGAGGTGCGGAAGCTTTCATCAGGCT  
CTACCCTGGAAGTGAGTAGCCTATGATTTTAGAGGCTCTGTTTACCCACTTCAACAGAC  
TCTCCATTTCTGATGTACTTTT

>1628

CGCATGACTGTGTCCCATCTTTGGTTTGACAACCACATCCACACAGCTGACACCACGG  
AAGACCAGTCAGGTGTGGGGGAGGGAGGGCACAGGCCAGGGCAGGATCTGGTGG  
ATGGTGGAGACCTGAAGAGGGATAGG

>1629

CATCACCGTCAGCGTGCCCCTGCCCTCGGGTGCATCACCATCCTTTCATCGAACTCT  
GCACTGACATTGTAAGTCCACAGCCCAGGGTACCCATCCACAGGGTGCCAGAGACAC  
TTGCTTGCAGATGGACAGGAGGG

>1630

AACTGCAAAGATGCTGTCCGTGCGCGTTGCTGCGGCCGTGGTCCGCGCCCTTCTCGG  
CGGGCCGGACTGGTGAGCACCGAAGGCCGGCATGATGCAGGCGGCCGGGTGGGGCTG  
CAGGGTGGTGGTGCGCCGGCTCGGG

>1631

AATGCTTTGGGTTTCATCTTTCATTGCTGCAAGGAACTTCCATGCCTCTAACACTCATCTT  
CAAAAGACTGGTAAGTTATTATTTCTCAGTCTACGCCCACTTACTAGATGAAGATATAA  
ATTACATACATCGTATAACT

>1632

TATTGCCCGCTACATGGGCTGAGGAATGTTCAAGCAGAAGAAATGGTAGAGTTTTCTT  
CAGGCTTAAAGGTAAATTATAAAATAAGATTTTGGTGTTTTAGGATCTAAGTCTTCTCAG  
TTATTCATTTAGCGATTCAAA

>1633

GGACGTTCCAGTTGGTGAGGAGCTGTTGGGTCGTGTAGTTGATGCCCTTGGTAATGCTA  
TTGATGGAAAGGTAGGTTTAAATGTTTCGTTAGATATAGTTGCAGCTTCTAACAAACATCA  
AAACTGATTATGCTTAGGGTTT

>1634

AGGCTGTGGATAGCTTGGTGCCAATTGGTCGTGGTCAGCGTGAAGTATTATTGGTGAC  
CGACAGACTGGGTAAAGACTCAAAGCATATTAAGTTCTAACTAAAATTTGCTCAAT  
GGAAGGATTATATTTTAGTCTT

>1635

TGATTTATGTTGCTATTGGTCAAAGAGATCCACTGTTGCCAGTTGGTGAAGAGACT  
TACAGATGCAGGTATTAAGAAATTTAGTCCCATTGCTATTATCTTAAGTCCCATTGCT  
GCTGATTGTAGAATAGCTTCT

>1636

TTCCATGGGAGAGTATTTTAGAGACAATGGCAAACATGCTTTGATCATCTATGACGACT  
TATCCAAACAGGTCAAAGGAAATAAATTTTAGAATCCATTTATTTGACTGAAGTAAA  
AGTTCACATATGCAACTTCTAT

>1637

CATAGAAACACAGGCTGGTGATGTGTCTGCTTACATTCCAACAAATGTCATTTCCATCA  
CTGACGGACAGGTATTATTTAATGATTAAGAAATGTTAAAAAAGATTTGGATAATTC  
TAAGGCATTGGTTGAGACTAA

>1638

CCCTGCAATTAACGTTGGTCTGTCTGTATCTCGTGTCCGATCCGCTGCCCAAACCAGGG  
CTATGAAGCAGGTAATTTTGCATCACTTTGGCAGTAAGGGGGCTATCATTAGATTAGCAT  
CTTAAGGTATTAATATATTA

>1639

GATGCTGCCACTCAACAACCTTTGAGTCGTGGCGTGCCTAACTGAGTTGCTGAAGC  
AAGGACAGTATTGTAAGTTGTTCTTTCTTCACTTGGTCAGGTTCTATTGTGTATCAGG  
GTCTTCCCAGGCCTACAGAGCT

>1640

TTACAAAGTTTGAGAATGCTTTCTGTCTCATGTCGTCAGCCAGCACCAAGCCTTGTTG  
GGCACTATCAGGTATGAATGCAATGTTGGCATCTTTTTTAAAGTTATGTTAAGATAT  
GAAGTAAAATTATTTTCAA

>1641

CTACCCCTTCAGCGTCGCTGCCCCAGCTCAGCTCTTACTGCGGGCCGCTCCGACGG  
CGGTCCATCCTGGTAAGTGCTTTTCTTAGGAGCTAACGTTCCATTTGCCGCCCATG  
ACCTTGAGCCGGGAACGATGGT

>1642

CCAATTCTAAATGCCCTGGAAGTGCAAGGCAGGGAGACCAGACTGGTTTTGGAGGTG  
GCCAGCATTGGGTAAGTAGAGTTGTTAGGAATAGTAAAGACCTGTGTAGCCCAA  
TATCCCCAAAACCAAGCTGTCTGC

>1643

AGACTTTGGGCAGAATCATGAATGTCATTGGAGAACCCTATTGATGAAAGAGGTCCCATC  
AAAACCAAACAGTAAGTTGCTCTTATTGCATCTATGCACAAAGGAACCTCTGTTATTTG  
CAGTTTTACACATTAAGGTGAC

>1644

CAGGAAATTCTGGTACTGGTATCAAGGTTGTCGATCTGCTAGCTCCCTATGCCAAGGG  
TGGCAAATTTGGTATGTTATTAAGGGGTACATATTTCCAAACCTAATATGGGAGGAAA



AACTCATACAATGTTATGAGTG

>1645

TGAAGGCAATGATTTATACCATGAAATGATTGAATCTGGTGTTATCAACTTAAAAGATGC  
CACCTCTAAGGTAAGCATTGAGCTAATTGATGTCCACGTGGTAGTTACGCCAGGAAACT  
ATTGCCAACTGAAGCCATGTT

>1646

AGACCAAGAAGGTCAAGATGTACTGCTATTTATTGATAACATCTTTCGCTTCACCCAGG  
CTGGTTCAGAGGTAAGAGGGAAGGCTTGAGAGGACCTGGTTCATCTGGCCTTCTTCG  
GATGAGGCTAAGGATGTAGACAC

>1647

GGCCACTGACATGGGTACTATGCAGGAAAGAATTACCACTACCAAGAAGGGATCTATC  
ACCTCTGTACAGGTAAGAAAATTACATAGATGAAGATCTGATTTGTATAAAGGCAGGG  
TGCAGTGGTGCATCTCAGCTACT

>1648

TATCATGGATCCCAACATTGTTGGCAGTGAGCATTACGATGTTGCCCGTGGGGTGCAA  
AGATCCTGCAGGTGAGTATATTACTATGTGGGATCAGTGTCCGAAAGTCAAAAAGAG  
GGCCTGTGGGGACTATATGAGGA

>1649

TTCACAGGTCATATGGGGAAGCTGGTACCCCTGAAGGAGACCATCAAAGGATTCCAGC  
AGATTTTGGCAGGTGAGATTTTGTAGTACAAATCTTGAATGTTTACTGTGCTGTGGTCCC  
ATTCCAACAACCGTCAAGCAATA

>1650

GGCACTTCTGCGGGGGTGCCTGATCCATGCCCGCTTCGTGATGACCGCGCCAGCTG  
CTTCCAAAGCCAGTGAGGGTCTGGGGAGGGGGCCTAGGGGGCATTGGGGCTCAGA  
GAAGGGGCTTGGGGGGCTTAGGCAT

>1651

TTCCATCAGCAGCATGAGCGAGAATGGCTACGACCCCCAGCAGAACCTGAACGACCTG  
ATGCTGCTTCAGGTGAGAGGATGGTGCCACCTGTGATCCCAGCACCTCGGGAGGCCGA  
CGTTAGCCAGGAAACAAGTCCAA

>1652

CCCCGAGGACCAGTGTGCCCCAACACGTGTGCACCGGTGTGCTCACCCGCCGCGG  
TGGCATCTGCAATGTGAGTGCTCCCTGTGGCGGGAGGAGGGTCTGAGAGGTACTGA  
GCTCTCCGTGGCAGGAGAAAGCAAG

>1653

CAAGGGCACCTTTGCCACACTGAGTGAGCTGCACTGTGACAAGCTGCACGTGGATCCT  
GAGAACTTCAGGGTGAAGTCTATGGGACGCTTGATGTTTTCTTTCCCTTCTTTCTATGG  
TTAAGTTCATGTCATAGGAAGG

>1654

GAAAGTGGAAGACAAGAAGAGCAAACCAGTGTACAACAGAAGGCTGGTCTCCAGA  
GCCAAGGTGCTTCAGTAAGTCAGCTGGATATGTCACTCAATGTTTCAATACTCAAAGAA  
ATTTGTATATAAAAATAGGGGTCCA

>1655

AAGGATGAAGAAGTGGTTCAATGTCTCTCTGATGGATGGTCTTCTCAACCAACCTGTA  
GGAAAGAACATGGTATAAGAATCATTTCCCTAAACTGAAGATAAGTGCTTATCAAGCTTA  
TATTGAATATATTGAAGCTTATA

>1656

GCTGGAGGAAAGAAGACAGAGGAGGTAGAATGTCTCACATACGGATGGTCTCTCACA  
CCAAAATGTACCAGTAGGTTCTCATTGGAATAAAATCTACTCTCACTCTGAAAAGCTTT  
TTCTCATAGAGAAGTGTATATAAG

>1657

TATCTAAGTGGATCTGATTTAATCAATGCTATAACTTTGGTTGGTACCCAGAATCTCCT  
GTATGCGAAGGTAAATTTTTAAATTTAATACTCGCAAAATGCCATGTCTTTATCAGCTTT  
AATCTCTATTAGCTCTGACA

>1658

TTTGAGATCCATGGGTCAGCAGAAATACGTTGTGAAGATGGAAAATCGACAGAACCTC  
CAAAATGCATTGGTTAGTAACACCTTGAAGAAGCTTTGCTAAAATGAAATCTGCATGTG  
TAGCTAAATGGTCAGTTCTCTTT

>1659

TACCTTCTCCATGGATCGAATGAGATAACTTGAATCGTGGAAAATGGACACTTCCTCC  
TGAGTGTGTTGGTATGTATGCTACATTTACCATCAGTAGCTAAACTTATGGTGAAAATT  
TTCCATTCTGTTACTTTAATC

>1660

TACTTACTGAGGGGATCAAAAATATCTCGTTGCGAACAAGGAAAATGGTCATCCCCAC  
CTGTTTGCTTGGGTAAGAAAGAGAACACATGGAATGTCTACGTTTGACTTTTATGTGA  
TTTTCTTACAGTGTTTTATATCA

>1661

ACCCATTGTCTGAATTATCTGTGCAGTGCAACAGAGGAGAAGTGAAATATCCTTTATG  
TACTAGAAAAGGTAAATAATAATGTTCTCTGCAAGTATCTTTACTTGACCAATATCTGC  
TACCTCGGTTGAAAATTTATT

>1662

CATTTCTAGAAGGATCTAGGGAGGCCTATTGTTTAGATGGAATGTGGACTACACCACC  
ATTGTGTTTAGGTATGTACTACTAAATATGCCTCTAACAAAGTAAAATATATATTTTTAA  
TTTGCTGTCATTTTTGAGTT

>1663

CTGGATCTACTTAGAATGCAATGTGACAGAGGGCAGTTAAAATATCCAAGATGTATT  
CCAAGACAAAGGTAAGAAGTTTTTTTTTTTTGGTCAGATTATTTTTTTGGTCAGATTGT  
TATTCAACATTTAGAAAATGT

>1664

GAGAAGGAGCTGAAGGAGATCAGGGTCTTGACAAGGCCTTCGGACCAGAATTGAGA  
GAGGAATTTCTAGTAAGTAACTGGGTCATGGGTGTGTGGTTCCATCTAAACACTG  
CATGTATGTGGGGGGAGATGGACC

>1665

CACACCGCCTGTATCATTGATGTCTTCGGTGTCACTCACAGAGAGTCTATCATGAATGT  
CAATGTGAAAGGTATGGTAGGCTGGGGAGGAGATGCAGCAAGGTGGGGAATTAAGGA  
TCACAAAGAAGGGCCAGGAAGGGA

>1666

GGAGTTTGTCAAGGCCAAGATCGTGTCTCGAGAGGGTGGCAAAGTCACTGCCGAGAC  
TGAGTATGGCAAGGTGGGTGTGAGGCTGATGTGAGAGTCCACCCTGGCCACCTGTACA  
CCTGGGTGGACAGAGAGGGGTACAC

>1667

GCTGACCTTCTGCATGAGCCCGGGTGTCTACAACCTCAAGGATCGCTACGGCTCC  
TGGATGATCTACGTGAGTGCTGCACCTGGCCCTACGTTGGGATCTCTGTTCTTGCTCCA

TCCATGTCCACCCCAGGAGCCAA

>1668

AAGAAGAGGAGCGAGGCCCGCCCCACATCTTCTCCATCTCCGACAACGCCTATCAGT  
ACATGCTGACAGGTGAGAGGCCCTGGAAGGTCTTCTGAAGGGAAGTGGGATAGGCC  
GGGAGGGAGAGGGAGAAGGAAGGGA

>1669

GGTCATCCAGTACTTTGCTGTTATTGCAGCCATTGGGGACCGCAGCAAGAAGGACCAG  
AGCCCGGGCAAGGTAGGCCTGCTGCCCTCAAGGTCTGTACCGCAGAAGGGAGGGA  
GAAGAGCTCTCACCTGCCTCCTTCT

>1670

CCAGGCCAACCTGCTCTGGAGGCCTTTGGCAATGCCAAGACCGTCCGGAACGACAA  
CTCCTCCCGCTTCTGTGAGTGGTCCCTGACCTTGGCCTTGGGACTTGGACTGGTGGAGG  
AATGGTCTCAGATATGAGCCTTCCC

>1671

CAGCTGAAAGCAGAGAGAGATTATCACATTTTCTACCAAATCCTGTCTAACAAAAAGC  
CTGAGCTGCTGGGTGAGTCAGAGCCACCGACTGAGACCAACTATCTCCATGGCAACCT  
GGTCCCCTCTGCTTGTGGCTGGAC

>1672

TGCATTATCTCCCAAGGAGAGACCACCGTGGCCTCATTGATGACGCTGAGGAGCTC  
ATGGCCACTGATGTGAGTGTGTGAGGACCCAGCCAGGGGGTGGGAGGATTGGCAGTG  
AGGGGCAAACAGGGGTCCAAAAGCA

>1673

ATGCACTTTGGAAACATGAAGTTCAAGCTGAAGCAGCGGGAGGAGCAGGCGGAGCCA  
GACGGCACTGAAGGTGGGAGGCAGGATTCTTGGGGCAGCTGTAAGTCATGAGGCAGT  
CTGCTCAGCAGTATCTCTTCTCTT

>1674

CAAGGGGCTGTGCCACCCTCGGGTGAAAGTGGGCAATGAGTACGTACCAAGGGGCA  
GAATGTCCAGCAGGTGGGTCCATCTTCAAGATGATAATGGGTGGGCAGGGTAGGGAGAC  
TGGCATGGTGGGATGAGAGTTTTCA

>1675

CCTGGAGACCAAGCAGCCACGCCAGTACTTCATAGGAGTCTTGACATCGCTGGCTTC  
GAGATCTTCGATGTGAGTTGGGACCCCTGGGAGTGGGAGAACAATCACTCACTCGCTC  
CCACATTCAACAGCTATTTGCTTA

>1676

GGAGGGCATCGAGTGGACATTCATTGACTTTGGCATGGACCTGCAGGCCTGCATTGAC  
CTCATCGAGAAGGTGCCTCTTTGGCCTTACCACCTGAATTCCCTGCACACCCAACAA  
GAACACCATAGACAAAATAGCAG

>1677

GGCTTGATCAGAAGTCTTCCCTCAAGCTGCTCAGCACCTGTTTGCCAACTATGCTGG  
GGCTGATGCGCGTAAGTAGGGACTGAGGCTCCCGGTACAGAGGAGCAGGGATTCTGC  
CAAGGTTCTGAGCCAGGTCAATTG

>1678

ATGACCAACTTGCGCTCCACCCATCCCCACTTTGTACGTTGTATCATCCCTAATGAGAC  
AAAGTCTCCAGGTGAGGCCACAACTAGGGCCAACCCACTGCTGGGCATACACCGCC  
CTGGGAACAGGACCTCCTAGGACA

>1679

TGCTGGAGGGCATCCGCATCTGCAGGAAAGGCTTCCCAACCGCATCTCTACGGGGA  
CTTCCGGCAGAGGTGGGTATGAGGGTGCACCCAGAGCTCATAGAACAGGGGGAGCCAG  
GCTGCCCTGATGGGAATGGGATCTG

>1680

GAAGGGGGCAGAGAAGCTGCTCAGCTCCCTGGACATTGATCACAACCAGTACAAGTT  
TGCCACACCAAGGTGAGGAAAGGAGACTAATTAATTAAGGAAGACATCTCTTTTCC  
ATTGACTCCTCTGATGCTTTTCCTG

>1681

TCACGCGTATCCAGGCCAGTCCCGAGGTGTGCTCGCCAGAATGGAGTACAAAAAGCT  
GCTGGAACGTAGGTGAGAGATCTCAAGAGGAGGTTTCCCGCTTCTCTGAGGCCAGG  
CTGGTTCAGGGCAGTGTGAGAAA

>1682

CAAGGAGCTGGAGGAGAAGATGGTGTCCCTGCTGCAGGAGAAGAATGACCTGCAGCT  
CCAAGTGCAGGCGGTGAGGCTCCTGGGCTACTGTTGGCTCTTCCACCTGCTCTGCCT  
TCACTTCCCACAACCCTGCACCTCC

>1683

AAGGGACATCGATGATCTGGAGCTGACACTGGCCAAAGTGGAGAAGGAGAAACACGC  
AACAGAGAACAAGGTAAGGGCAGCTCCCTTTGGCTCCAGCCCGGTCTCATCAGGAC  
TCTCAGACCATACTGACCTTGACCCA

>1684

TCAGGCCGAGGAGGACAAGGTCAACACCCTGACTAAGGCCAAAGTCAAGCTGGAGC  
AGCAAGTGGATGATGTGAGTAGATTGAGAGTTGTGGGGCCTAGATATGCCATGTCTATC  
TGTGCCCAGAGCTCTGTGTGTGTGT

>1685

TGAAGCTGACCCAGGAGAGCATCATGGACCTGGAGAATGACAAGCAGCAGCTGGATG  
AGCGGCTGAAAAAGTACTGTGTCCCCTCCCTGCTGCCCTTCTCCTCCCCAGCCATAA  
CAGTACAAGCAGACCCAAGACAGC

>1686

TCTCAACGCAAGGATTGAGGATGAACAGGCCCTCGGCAGCCAGCTGCAGAAGAAGCT  
CAAGGAGCTTCAGGTGAGGTCTGGACACCACGCGGGATGCTGAGTCCCTGGGCTGG  
TTCTGTTTCCCCTGCCCTCCTCTA

>1687

AAGGCGGAGGAGACCCAGCGTTCTGTCAACGACCTACCAGCCAGCGGGCCAAGTTG  
CAAACCGAGAATGGTGAGCCTAGAGCAGGGGCTCCATGGTTCCACACAGTCTCCCC  
AACCTCCTGAGCCACTCCAGCCTCG

>1688

GACCCGAGGCAAGCTCACCTACACCCAGCAGCTGGAGGACCTCAAGAGGCAGCTGGA  
GGAGGAGGTTAAGGTAAGGGCTAGACTCGGGCCACCTGGCCCAAGCAAGGAGCACAC  
TGACTIONCTTGCATCAAATCACTTC

>1689

AGGTGGCCAGTGGAGGACCAAGTATGAGACGGACGCCATTACAGCGGACTGAGGAGC  
TCGAGGAGGCCAAGTGAGTTCTGAGCAGCCTGACTTCTGGCTGAGGCCCTTTGCAG  
GCAGGACTCAGCCCAGCCCCAGCCTC

>1690

GATGGTGGACGTAGAGCGCTCCAATGCTGCTGCTGCAGCCCTGGACAAGAAGCAGAG  
GAACTTCGACAAGGTGGGCCCTGGGTGGGGGCCGAGCCAGCATGCAGGGCAAGGG

GGCATGAGGGGTTTCAGTGAGAGGCCAG

>1691

CTCAAGAACGCCTATGAGGAGTCCCTGGAACATCTGGAGACCTTCAAGCGGGAGAAC  
AAAAACCTGCAGGGTGTGCTGGGGGCCCAAGAGGCTGGGGAGGGGCTGCACTGGCA  
GTGTTCCCATATGGTGCCACCCAAGGG

>1692

GCTGGAGAAGGTCCGAAAGCAGCTGGAGGCCGAGAAGATGGAGCTGCAGTCAGCCC  
TGGAGGAGGCCGAGGTGTGTGTGTGTGCAGGGCACGGGGTGCAGGGAGCTGAGCTCC  
AGGATTTTGGCTCCCTGTTCTCATCCC

>1693

GCTCAGCCACGCCAACCGCATGGCCGCCGAGGCCCAGAAGCAAGTCAAGAGCCTCCA  
GAGCTTGTGAAGTACTACCCAGAGGGGACTGGCTCCACGTGGCCTGGCGAAGC  
AGTAGTGTCTTGATACAGGCACCAGA

>1694

GCGGTCCCAGGAACTGGCGGAGCAGGAGCTGATTGAGACTAGTGAGCGGGTGCAGCT  
GCTGCATTCCCAGGTGAGCAGCTCCCCTGCTCATTCTGAAGGGAGCACAGGCTGGGG  
CTCAGCAAGCAAGGCTTGAGAGCTA

>1695

GACTGAAGTGGAGGAGGCAGTGCAGGAGTGCAGGAATGCTGAGGAGAAGGCCAAGA  
AGGCCATCACGGATGTAAGTCCCCACTCCACCGACCCGATCCAGACCAGTGTCTCTC  
CGTGGGCTGGGCAGCAAGTGTGTGAG

>1696

GAAGCGCAACGCAGAGTCGGTGAAGGGCATGAGGAAGAGCGAGCGGCATCAAGG  
AGCTCACCTACCAGGTGCGACGGGCGGTGACTCCAGGCAGAGCCCTGGCACCATAGC  
CACAGTGACAACCAGCTGAGGAGAATG

>1697

GCGGCTGCAGGACCTGGTAGACAAGCTGCAGCTAAAGGTCAAGGCCTACAAGCGCCA  
GGCCGAGGAGGCGGTGAGTGACCCTGCTGGGGACTAGGCCAGGGGAGGCATAGGA  
GAGCTCGTCCCCCAAGCCAGGAGTCTG

>1698

GGAGCGGGCGGACATCGCCGAGTCCCAGGTCAACAAGCTGCGGGCCAAGAGCCGTG  
ACATTGGCACGAAGGTGGGTCCTCTTTTGGGCTTTGCTAGTCACCCCACAGCAGGC  
ATACCCAGACAGAGCACCCCTCAAACC

>1699

CCTGGGAGGTCGTTCCACCCGCTGGGCAGCCCCGGTTCAGCCTCGGACTTGAAAC  
GTCCGGGTTACAGGTGAGAGCGGAGGGCAGCTCAGGGGGATTGGACAGCAGCAATGA  
AAGGGTCCTCACCTGCTGTCCAAGA

>1700

GTGCAAGGGTCTGGCTGCTTTGGGAGGAAGATGGACCGGATCAGCTCCTCCAGTGCC  
CTGGGCTGCAAAGGTAAGCACCCCTGCCACCCCGGCCCTTCCCCATTCCAGTGT  
GTGACACTGTTAGAGTCACTTTGGG

>1701

ATCTTAAACCAGCTTGGTGCAGATAGTCTGACTAGTTTAAGGAGACTGGCCGAAGCTC  
TGCCCAAACAATGTGAGTTTCTAGTAATGGTTTTACCAGGGAATTACTATTTAGCAG  
CTGATTTCTGATCTCAGGGCTCA

>1702

GATGGTGAGAGGCATGCCTTCATTCTGCAGGACACAAAGGCTCTGCACCAGGTCTTTG  
AACATATGCTGGGTGAGTGAGCTTTGCCCTCCTTGGTGTGGGGAGGATGGTGAGGAGC  
CCGCCAAAGGCCCGTTTTGGGAAC

>1703

CTGCGGGGTGGGGAACATGTCAGCAAACGCCTCTGACCAGGAGAGGACACCCTGGCA  
TGTCATAATTAAGGTACCAGGAAGGAGGGGCAGGGCTTGGATTCCAGAGGTAAAAGC  
GGCCATGGGCCAGACATACTGCAATC

>1704

CAATGGGTCTGACAGCAGCTCATTGCTCCGCGATGGCAACGACCACTCCCTGTGGA  
GGGTCAATGTGGGTAAAGGCAGGGGATGCACCAGCCTCCTGATCCGTGAAGCCACAGAT  
CCTACCACCTACCCAGCCTCTGG

>1705

TGGAGTTCTATGGTGATGACATAGCTCTGCTGAAGCTGGCCCAGAAAGTAAAGATGTC  
CACCCATGCCAGGTGCCTGGAGTCTTGGATGGGAGGGTGCCTGCAGGGAAGAGTGC  
TCTGGAGATCCCTGGAAGAGACTAC

>1706

TGCCTTCCCTGCACGATGGAGGCCAATCTGGCTCTGCGGAGACCTCAAGGCAGCACCT  
GTAGGGACCATGGTGAGTGCTGGGACTTATGGTCTTGGAGAGCTGGGGCCGGGGTTTG  
GGGGTGATAACAAGGACTAGGCTG

>1707

GAGTGTTCCTGCTCATTTTGTGCGCTTGAATGGGAGCAAACCTGAACATTAACCTTAAGA  
TGGGAGTGGAGGTGAGGGTCTCAGGTTGGGGATGCTGGGATCCCCCTGTGACAGCTC  
CCAGAATGTCTCTCTCCTTCTCC

>1708

GATGTCAGGGAGGTGGTGACAGACCAGTTCCTATGCAGTGGGACCCAGGAGGATGAG  
AGTCCCTGCAAGGGTGAGTCCCTCACCATGCCTGGATTCCCAAGGGGAAGGCCACCTG  
TGTCTCTGTGGCCAGCATGCATGCC

>1709

GGGTGACAAGCACACCCTGAGCAAGAAGGAGCTGAAGGAGCTGATCCAGAAGGAGC  
TCACCATTGGCTCGGTGAGTGGCCTCCTCCCAGGACCCCTTTCCACCCTTGTCTT  
TGGAAGCAAGGATTAGGGGAGAGAG

>1710

AGGGCAGAAAGTGAAGGGCACCGTCCGCCGTGTGGTCTGCGAGGGGAGGTTGCCTA  
TATCGATGGGCAGGTACGCAAGTAGCCCTGCCTGATCTCAGTAGTGCCTCTTCTGCA  
CCACGTTCAATTTCTCCCTACCCA

>1711

ACGGAAGTGGCCACAGGGGGCTGTTCTCAGCTCCCACCTCAGCCCCTGCCACTAGT  
GAGATGACCACGGTATCCACACTACTGGGCTAGGGGGCTGGGAGGTGTTAGTCTCAGG  
GCAGGATGAACAGCTTGAACATTT

>1712

CCAGGGCTTCTGATGGCCGCTTCCATCTGCCGCCCGAATCCATCGAGCCTCCGACCC  
AGGTTTGCCAGGTAAGAGTGGGGTTCCTGTGACTCAGAGACTGTGTAGGGACAGGAT  
CCACTTCTTCCAGTGCCTCGCCT

>1713

GACCTCACCCCTGCTGCACTCATTAGTGGGCCAACATATCCTGTCCGTCCAGCAGTTCA  
CCAAGGATCAGGTGCCTGGGGCAGGGAGGATGGGACCACCCAGAGCTTTGAGGATTT

GGAAAGCTGGGGCTAGGACCTTTC

>1714

TCACCTGTTCAATGTGGCACACACTGCGTATGATGGTGCAGAAGGAGCGGAGCCTC  
GACATCCTGAAGGTCAGGATCAGGGCCGGGGGTAGGGTCCAGGCCATCGCCTGCCCTT  
GGGCCGCATCAGCCAGGGCCGCGC

>1715

CTCCGTGCAGACCATGAGCTGCTATGCCGACGTGCTGCTGCCGGCACCCCCAGCCT  
GGAGCAGTGGAGGTGAGGCCAGCCTGGGTACTGAGATGGGGTTAAGAAGGCTGGACC  
CAGGGGCATGAGAACCCTTCTGCC

>1716

GCACCCACCCAGGCCCTGCTGGACATCTTACCATCCGTGAGGAGCTGGAACTGTC  
AATGGCATGACGGTGAGGGTGGTGGCAGGGTTTGGATCCCTGCCAGGGGACGATCTAG  
AGAGGGAGGCAGGAAGTGGTTACC

>1717

CGTGGCACCTCCAGCCTGCGCATGCCACCCACTGTGCGGGCCTTCGTGGCCTCCCGC  
GGCACCAAGCAGGTGAGACCCTCACAGCCCTGCCTGGAAGCCATGGAGATGTGGGT  
GGGCAGTCAGAGCCAGCGCTGCAT

>1718

TGACACTGATGTGCTCTACATGACTCGAATCCAGAAGGAACGATTTGGCTCTACCCAG  
GAGTACGAAGCTGTGAGTGCTGGGCTTGAGGAAGAAGCCAGGGCTGCTGCCGTAGGG  
CATCAGATATGAGGACAGAAAGGCT

>1719

CCCACATCATGACCCGGGCCAAGAAGAAGATGGTGGTGTGCACCCGATGCCCCGTGT  
CAACGAGATAAGGTGGTGCAGCATCAGAGTCAGAGACTGCCTCGGGGCTGGTGGACG  
GGAGGAGACTTAGTCCTGGACAAGC

>1720

GTCAGAGCAGATGTGGAGGGTTCCTGGTGCGAGAAGACTTTGTGCTGACAGCAGCTC  
ATTGCTGGGGAAGGTGAGGAGCTAAGGAACCTCCTGGCCAGCCAGGAACACAGCCCT  
GCGGAGCTCTTCGGTGGAAAGAGCCAT

>1721

TGCGCGCAGAGCCATCCGCCACCCTCAATATAATCAGCGGACCATCCAGAATGACATCA  
TGTTATTGCAGGTACCACCTACCTGGCCCTCTGGCTCCTTCTAGTGTGCCGGGGACA  
ATGGAGGAGGAAGTGAGGGCAA

>1722

CTTCGGTTCCTACGACCCCGAAGGCAGATTTGTGTGGGGGACCGGCGGGAACGGAA  
GGCTGCCTTCAAGGTAAGGCATGGGCATTGGCCAACACACCCCGGGAGAGAGGGGCC  
CGTGCAGAGCCAGGCAGTGCGAACAG

>1723

GAAGTACAGCACTTTTGGGGAGGCGGCCTCAGCACCTGATGGCCTGGCTGTGGTTGGT  
GTTTTTTGGAGGTGAGTGGTGGTTTGTGCTGGGGCCTGGAGGGGCATGGGAGGCCTGCA  
CTGCCCTAGTTCTAGAACACAGT

>1724

GACTCCCCACTCAGTGAGAGTGTACCTGGATTGTGCTCCGGGAGCCCATCTGCATC  
TCTGAAAGGCAGGTGAGTCTCTCAGAGGACCAGATGGAGGGACATGGCACTCAGGG  
CTACCCAGGCAGTGTGACTCTCC

>1725

CGCGACTTCCTGCGCAAGGAGTACGGGGGCCTGGACGTGCTGGTCAACAACGCGGGC  
ATCGCCTTCAAGGGTATGGGGAGGGGACGTGGCCTCCCCGAAGAAGAACCGATGCAC  
TGGGGCTCCTGGCGTCTGCGGGGTCC

>1726

ACGATGAAAACAAATTTCTTTGGTACCCGAGATGTGTGCACAGAATTACTCCCTCTAAT  
AAAACCCCAAGGTGAGTCTGATGGGAAACAGCGCACCTTCTCTTTGGGGCTTGATTG  
GCCCTGCTTGCTGGGATTCT

>1727

CTCTTCTCCTCCTCTTCCCTACCCCCATGGAAGTCAGGCCGAGGAACCTCTAGTGGT  
GAAGGTGGAAGGTATGTCCAAAGGGCAGAAAGGGAAGGGATTGAGGCTGGAACTT  
GAGTTGTGGCTGGGTGTCCTTGGCT

>1728

CTGTGCCAGCCGGGGCCCCCTCTGAGAAGGCCTGGCAGCCTGGCTGGACAGTCAAT  
GTGGAGGGCAGCGGTGAGGGCCGGGCTGGGGCAGGGGCAGGAGGAGAGAAGGGAG  
GCCACCATGGACAGAAGAGGTCCGCGGC

>1729

CCTGAGATCTGGGAGGGAGAGCCTCCGTGTGTCCCACCGAGGGACAGCCTGAACCAG  
AGCCTCAGCCAGGTATGGTGTGACTGGGGAGATGCCGGGAAGCGGGGTCCAGAG  
ACAGAGGGGAGGGGAACTGAAGAGG

>1730

GCTGGAAAGTATTATTGTCACCGTGGCAACCTGACCATGTCATTCCACCTGGAGATCAC  
TGCTCGCCAGGTAGAGTTTCTCTCAACTGGGAGGCATCTGTGTGGGGTACTGGGAA  
GAAGTGAAGCCAGTCAATCTTA

>1731

TCAGCTGTGACTTTGGCTTATCTGATCTTCTGCCTGTGTTCCCTTGTGGGCATTCTTCAT  
CTTCAAAGAGGTGAGTCATGTCCCAGTGGGTCTGTCCAAACCTACTCCATCTTCCCC  
AGGATAAGCCGGCTCTGGCCA

>1732

CCCCCAGGAAGCGGGCCCCAGAACCAGTACGGGAACGTGCTGTCTCTCCCCACACCC  
ACCTCAGGCCTCGGTAAGAGGCACCGCCCTCCAGCCTATAGCTCCGCCCCAGATCCG  
GGGCTCCACCCCACTCTCCTCATC

>1733

TCTTATGGAACCCGAGCAGCGACGTCCAGGCGGATGGAGCCTTGGGGTCCCGGAGC  
CCGCCGGGAGTGGGTGAATGACTGGGAGAGGGAAGGGTCGTTCCCCACATGGAGGGG  
GTTGGAGCGGTCTGTGGCCCAATAG

>1734

CCTGACAGTGAGGAGGACTCCGAGTTCTATGAGAACGACTCCAACCTTGGGCAGGAC  
CAGCTCTCCAGGGTAAGGCTGCCCTCCCCGTGGCCCCCACTCTGCGGTGGCCTG  
TGGACTCCCATGGACACCCCTCCTT

>1735

AGAGGAATCCTGTATGCAGCCCCCAGCTCCGCTCCATTGCGGGCCAGCCTGGACCCA  
ATCATGAGGAAGGTGGGTGCTTCTGCCGTGTCCCCTGCTGTCCCCTGGGCTGACTTT  
GCCTTCCAGCCTACTTCCAGTGCC

>1736

GCCAGACCCAGCCTGGGGAGGAGGGGGCCGCATGGGCACCTGGAGCACCAGGTGATC  
CTCAGGTGGCCAGGTGAGCTGGGACTGCCCTAGGGAAAGCGGGGAGGGAGGGAGAT



AGGCACGGATGGCAGTGGCTGCTGGC

>1737

AGTCTTGCCCCAGCCTCGGGAGGTGGTGGAGTGACCTGGCCCCAGTGCTGCGTCCTTA  
TCAGCCGAGCCGGTAAGAGGGTGAGACTTGGTGGGGTAGGGGCTCAGTGGGCCTGG  
GAATGTGCCTGTGGCTTGAAAAGAC

>1738

GGTCCAGGAGTCCTCAAGCTCTGCCTGCCACCATCTTCTCCTCTTCTGCTGTCTGC  
TGTCTACCTGGGTATGTGGCCAAAGGGCAGGAACTGGCGGGAGGTGGGGGAAGCTGT  
GGAGGCTGCAGAGAGGGCACAGGC

>1739

TACGTGTGCCGGGTCCAGGAGGGCAACGAGTCATAACCAGCAGTCCTGCGGCACCTACC  
TCCGCGTGCCCGTGAGTGGCCAGCCCTGGCCCCTACTCCCACTGTCCCGCTGGGGA  
CACTCGGTTTATCTTTGAAGTGGG

>1740

AATCATCACAGCCGAGGGGATCATCCTCTGTTCTGCGCGGTGGTGCCTGGGACGCTG  
CTGCTGTTTACGGGTGAGCCCCCTCGGACCTCTGAGTCAGCCGGGCGAGGGCCTGGGC  
CCGAGGGACCCCAATACCCAGGTA

>1741

AAACGATGGCAGAACGAGAAGCTCGGGTTGGATGCCGGGGATGAATATGAAGATGAA  
AACCTTTATGAAGGTGAGTGAAGGGTGGGGATGGGGTAGGGGCAGTTTTGTTAGGGGT  
GGGGGTGTTCCCTCTGGGGGTGGCT

>1742

GAGACCATGGAGTCTCCCTCGGCCCTCCCCACAGATGGTGCATCCCCTGGCAGAGGC  
TCCTGCTCACAGGTGAAGGGAGGACAACCCCTGGGAGAGGGTGGGAGGAGGGAGCA  
CAGAGACTGGCTGGGGTCTCCTGGGT

>1743

CACCATGGGGCGCCTGCAACTGGTTGTGTTGGGCCTCACCTGCTGCTGGGCAGTGGCG  
AGTGCCGCAAGGTAAGAGCCCAGCAGAGGGGCGAGGTCCTGCTGCTCTCTCGCTCAA  
TCAGATCTGGAACCTCGGGCCAGGC

>1744

TTCAAGGGCATCCCCTTCGAGCTCCACCAAGGCCCTGGAAAATCCTCAGCCACATC  
CTGGCTGGCAAGGTGGGAGTGGGTGGTGCCGACTGGCCCTGCGGCGGGGCGGGTGA  
GGGCGGCTGCCTTCTCATGCCAAC

>1745

CAGGACAGCACCTACGGGGATGAAGACTGCCTGTACCTCAACATTTGGGTGCCCCAGG  
GCAGGAAGCAAGGTCTGCCTCCCCTCTACTCCCAAGGGACCCTCCCATGCAGCCACT  
GCCCCGGGTCTACTCCTGGCTTGA

>1746

ATCGTGGTCACCTTCAACTACCGTGTGCGCCCCCTTGGGTTTCTCAGCACTGGGGACG  
CCAATCTGCCAGGTGCGTGGTGTGCGCCCTGAGGTGGGCGGACCAGCATGCTGAGCC  
CAGCAGGGAGATTTTCTCAGCACC

>1747

CTTCGGGGGGGACCCCAACAACATCACGCTCTTCGGGGAGTCTGCTGGAGGTGCCAG  
CGTCTCTGCAAGTCTCGGGATCCCTGTGGGGAGGGCCTGCCCCACAGGTTGAGAGG  
AAGCTCAAACGGGAAGGGGAGGGTG

>1748

CATCAGCCAGAGCGGCGTGGCCCTGAGTCCCTGGGTCATCCAGAAAAACCCACTCTTC  
TGGGCCAAAAAGGTAACGGAGGAGGGCAGGGCTGGGCGGGGTGGGGCTGTCCAC  
ATTTCCGTTCTTTATCCTGGACCCCA

>1749

CAGTGTCTGAAGGTTACTGATCCCCGAGCCCTGACGCTGGCCTATAAGGTGCCGCTGG  
CAGGCCTGGAGTGTGAGTAGCCTGCTGGGTTGGCCATGGGGTCTCGAGGTGGGGTT  
GAGGGGGTACTGCCAGGGAGTAC

>1750

ACATGGACGGCCACATCTTCGCCAGCATCGACATGCCTGCCATCAACAAGGGCAACAA  
GAAAGTCACGGAGTAAGCAGGGGGCACAGGACTCAGGGGCGACCCGTGCGGGAGGG  
CCGCCGGAAAGGCACTGGCGAGGGG

>1751

ACTTTGAGACCGATGTCCTCTTCTGGTGGCCACCGAGATTGCCCTAGCCCAGCACAG  
AGCCAATGCCAAGTGAGGATCTGGGCAGCGGGTGGCTCCTGGGGGCCTTCTGGGGT  
GCTGCACCTTCCAGCCGAGGCCTCG

>1752

GCTACCGGCCCCAAGACAGGACAGTCTCTAAGGCCATGATCGCCTACTGGACCAACTT  
TGCCAAAACAGGGTAAGACGTGGGTTGAGTGCAGGGCGGAGGGCCACAGCCGAGAA  
GGGCCTCCCACCACGAGGCCTTGTTT

>1753

GATGCGTGACCAGGACAAGAACTGGTGGAGAAGAGCTGCAAGGATGCCAGGGCT  
GGTTCTCAGCGTGGTGGGTGGCCGTGTGTAAGCAGGTGTGCACACGTGTGGGCCACA  
TACGCCGTGTGCTGGTGCAGTTGGAA

>1754

CAGAGCGGCAGGATGGAGATGTGGAGCTCTACATCTCTGTGCAGAACCTGAGCCGTCC  
CAGCTCAGCAAGGTAGGGCCCTGTCCCCTCCCCACCCTGTACCTGTCACCCAGGGT  
GAGCGCACGCTTATAGACCCCTGC

>1755

TGGACGTGAAGACGCGGCTGGAGCAGGAGATCGCCACCTACAGCCGCTTGCTAGAGG  
TTGAGGACGCCCGGTGAGTGTGCACCCAGGTACCTGCTGGGGCGGGCTGGGGGCCAC  
TTCACCCAGGGAGAAGTTGGTGTCTG

>1756

AGGAAGGATTAAGGGTGGAGGGAAGGGACAGCCCCTGTATTGGGAAAAGTTTCAAG  
AATCAGCCCCTGAGTCCCTGTACCTGGTGGCTGGTCCCTGGGAGGGCCACATACT  
TTCCAAGGACCACACCTGTTGGGA

>1757

AGAGGCAGGCCCCGGGGCCGCCGTGACTACAGCCAGTACTACAGGATAATCGAGGA  
GCTGCAGAACAAAGGTAGGGCCTGCTGGTGGGAGGGGTCTCCGGGGGGCATGACTTTT  
TCCCCCAACTCCTGCCCTGGCCAAA

>1758

CCGTGGACAATGCCAACATCCTGCTACAGAATGACAATGCCATCTGGCTGCTGCTGA  
CTTCCGACCAAGTGAGTCTAGCTGTGGGCTTGGGCAGCCTGGGTGAGTGGGGGA  
GGATCTCAGGTACCCCTCCTGACCC

>1759

GCGACCCGGAGATGCACATTGAGAACCTCAAGGAGGAGCTGGCCTACCTGAAGAAGA  
ACCACGAGGTGAGGTGGCTGGGGCAGAAGGTCAAAGATGCTGAGGAGTGGGTGCAG

AGCCCTGGGGTTGGGCCATGGCTGAGG

>1760

GATGCGTGAGCAGTATGAGAAGATGGCAGAGAAGAACCGCAAGGATGCCGAGGATTG  
GTTCTTCAGCAAGGTGGGAGCTGCTGCAGGCCAGAGGTCTCTCTTCGGGGCTGGGCTC  
AGGGGCCTTAGCACTGACAGTAGGC

>1761

TGGACATGAAGATGCGGCTGGAGCTGGAGATCACACCTACCACCGCCTGCTGGAGG  
GCGAGGATGCCAGTGAGTGGGGGAGCCTGGGGTCAGGGCTGGGGGCCTCTTGGCAG  
GGGTGGGGCTCTCAGACTCACATCTA

>1762

CCTCAAATTTTGTGGTGGTTTCCTTATAAGACGGAACTTTGTGCTGACGGCTGCTCAT  
TGTGCAGGAAGGTGAGACAACAGGGTCTATTTATCTCAAATGGGAGATGAACAACCA  
GAGTAGCATCCAGGAATACACCT

>1763

CCTCAAATTTTGTGGTGGTTTCCTTATAAGACGGAACTTTGTGCTGACGGCTGCTCAT  
TGTGCAGGAAGGTGAGACAACAGGGTCTATTTATCTCAAATGGGAGATGAACAACCA  
GGTAGCATCCAGGATACACCTGC

>1764

GGTTATAAGCAATTCCGTCATCCAAAATATAACACTTCTACTTTCACCACGATATCAT  
GTTACTAAAGGTGACAACACCTCTCTTCTCCCTTCCACTTCCATTCTCCTAAGCTTCT  
CCTTCAGGTCCTCATTGCC

>1765

AGCGTAGCCGCCACGCTACGCCCTGGACTGAGGAACCGCGACACCTACCACGGAG  
GCCAGGCTGCGGGTGAGCTTGTCCCGCCCTACCTCCTGGCTTTGCTGTCCTGGAG  
GCCTGTGGTAGAACCTGTGGCCTGG

>1766

TCTTGGTCAGCGTCCCATCACTCTGGCCCTGGCTGCCGCTGCCGCACTGCCAGCAG  
TCTCTTGATCTGGTAGGTTGAGTGAGGCTGGGTGGCAGAGGGAGCCTGAGGGAACCC  
CCTCCAGCCCCCTCCCTGACAGG

>1767

GCTCCCCAGTCGCTGGTGTGCTGACGCTGCTCGTCGCCGCTGTCTTCGGTGTGAGG  
GCCAGGATGTCGTAAGTCTTCCCCCGCCGCTGCCTGCCTGCCTGCTTCCATGCGTCC  
CTCAGCATCCTTCTCCCCGGCCC

>1768

TGCCTCAGCCCTGAGATCCCCTTCGGAGAGTGCTGCCCATCTGCCAACTGACCTCG  
CCTGCCAGTGTTGTAATTTATTTATTTCTGTTCAACATAAATAAATTACTTGCAAG  
CACTGCAAACACGCTCCCATAG

>1769

ACCTGGGACCCCTGGAAATCCTGGCCCCCTGGTCTCCCGGCCCCCTGGTCCCCCT  
GGTCTTGGTGGAGTAAGTATCCTTACTTCCATTCTCAGGCTGTCCCTCCAGAAATG  
TGGCTTTTAAATTGCTGCTTGA

>1770

TGCCAGATGGCTGGAGGATTTGATGAAAAGGCTGGTGGCGCCAGTTGGGAGTAATG  
CAAGGACCAATGGTAAGAAAAGACTAGTTCTTTGCAGCCAAAATGGCAGGAGGTG  
GCCCTTAGCAGAGCCAGAGAGTCTG

>1771

TCCTGAAGGTGCTCAAGGTCTCGCGGTGAACCTGGTACTCTGGGTCCCCTGGGCCT  
GCTGGTGCCTCCGTAAGTGAGCTTCTCTTTGGCCTGGGGGGGTCTGGGGTCTGTGGC  
TTTGAACTCTTGACTCTGTACTT

>1772

CTTCCCTGGGCCACGGGGTCTCCTGGCCCTCAAGGTGCAACTGGTCTCTGGGCCCCG  
AAAGGTCAGACGGTAAGAGCCCCAAAGTGACCCCAAGTTCCACTGACATCTCTGGAG  
TCAAACCCCATCACCCCTCTTTCCC

>1773

TGAAGAAGGCAAGAGAGGTGCCCGTGAGAGCCTGGTGGCGTTGGGCCCATCGGTCC  
CCCTGGAGAAAGAGTTAAGTGAATGTGGAGGCTCCATCCCATGGGGCCTGTGACCTCG  
AGAGGGAAGTGGAGTCCTTGTGGTC

>1774

TCTTGCTGGCCCCAAGGGAGCCAACGGTGACCCTGGCCGTCTGGAGAACCTGGCCT  
TCCTGGAGCCCGGTAAGTAGCAGAGCTGCTGTTGCCCTGGCTTCAGACCCCTCAGGC  
CCTTCTGGCTGGCTCCTTCCAGCC

>1775

ACCTCCAGGTCTCAGGGGGCTCGTGGGCAGCCTGGTGTGATGGGTTTCCCTGGCCCC  
AAAGGTCCAACGTAAGTAATAATTTGCTTCTATTTCCTTCCATGTGGTGCTACCTAC  
CTCCCTGCCCTCTGGGGAAAG

>1776

CTCTCCCGGTGCCAGGGCCTCCAGGGTCCCCGTGGCCTCCCCGGCACTCCTGGCACT  
GATGGTCCCAAAGTAAGTGAGGCTGCATCCAGTAGGGGTCTTCGTGGTAGCCTGGAGT  
CCCACTGAGCAGGAGAGAGGAGCG

>1777

CCCTCCAGGTCTTCAGGGAATGCCTGGCGAGAGGGGAGCAGCTGGTATCGCTGGGCCC  
AAAGGCGACAGGGTAAGTACTGAGGTTACAGCCTCCTCACCAAAGCTGTGGCTTTGCC  
AATGTCCTGCCCTTGTGATCGCT

>1778

AGAGGCCGGCCAGAAAGGCGATGCTGGTGCCCTGGTCTCAGGGCCCCCTGGAGC  
ACCTGGGCCTCAGGTGGGTAACGCTGCACTCCAAGAATTGTTCCCTCAAGGAAGGGCT  
CCTGGCGTGCAGATGGGAAGGCCCC

>1779

TGAACCCGGCCTCCAAGGTCTGCTGGACCCCTGGCGAGAAGGGAGAGCCTGGAGA  
TGACGGTCCCTCTGTAAGTCCCTACCCAGGCCCATGCCAAGGTCCCTGGGAGCAGGGT  
CGTGAGTGGCTTCTGAGCTCACAGA

>1780

TCAGAGAGGCATCGTCGGTCTGCCTGGGCAACGTGGTGAGAGAGGATTCCCTGGCTTG  
CCTGGCCATCGGTGAGTGTGGGGTATCCCTCCCTCCATCCAAGCTGGCCCTGCCTGCC  
AAGGCTTCTACCTCCCTCAGCAC

>1781

AGACAGAGGTCTCCTGGCCCCGTGGGTCTCCTGGCCTGACGGGTCTGCAGGTGA  
ACCCGGACGAGAGGTGAGCAGTGAGACCCCTGGGGTGGCCCTGATTGGGGAGAGG  
GGCCCTGTGAGTCTCTGTGCTGGGTCA

>1782

AGCCCTGGGCCCCCTGGCTCCCCTGGCCCCGCTGGTCCAAGTGGCAAGCAAGGAGA  
CAGAGGAGAAGCTGTAAGTATCCTGGAATTCAGTAAAAGCCGCCTTCCCTGCGCGGT

GGGGCTGAGGCAGTCCCTGGGTTTC

>1783

AGAGCCTGGCGAGAGAGGCCTGAAGGGACACCGTGGCTTCACTGGTCTGCAGGGTCT  
GCCCCGCCCTCCTGTGAGTGTCACTGCCTGCGTGGGACTTCCCGAGGCCTCCTGCCAC  
ACAGAGCCCACTTGAGCTCCCTGTG

>1784

TGCTAATGGAATCCCTGGCCCCATTGGGCCTCCTGGTCCCCGTGGACGATCAGGCGAA  
ACCGTCTGCTGTAAAGTGTCTGACTCCTTCCCTGCTGTGAGGTGTCCCTACCATCC  
GGGAGGCTTGAGCTCTTTTTTGC

>1785

GAGGGCTCCCGAAGAACCCTGCTCGCACCTGCAGAGACCTGAAACTCTGCCACCCT  
GAGTGGAAGAGTGGTAAGCTTGAGAACAGGATCCCCTGCCCGGGAAGCAGGGAGT  
CATCCCTTAGGCCTAGCAGCAAGGGA

>1786

CTGGTGGAGCAGCAAGAGCAAGGAGAAGAAACACATCTGGTTTGGAGAAACCATCAA  
TGGTGGCTTCCATGTGAGTACCTGGGTGCCCTAGATGATGAGCAGAGATGGCTCCTCA  
AACTCTTTCTTTTCTTTCTCCCTGG

>1787

CAATGACGTGGAGATCCGGGCAGAGGGCAATAGCAGGTTACGTACACTGCCCTGAA  
GGATGGCTGCACGGTGTAGTGGGGCTGCCAGAGAGAAGAGCTGCCTGTGCCAAACTG  
CCTGGAGCAGGGCTGAGGGTTGGCCC

>1788

CTGGTGGCCGCGCTCTGCGCCGGATCCTGGCAGAGGCGCCCCGAGTGCAGGCCAG  
CACAGGGAGAGAGGTGGGCACCGCAAGGGAGGACCCGGCCCCGGGGCACTGCACCGT  
GCCACCTCCGCTCCACTCGGCCTTCA

>1789

TGCCTTTCTCTGGAGCAGCCAGTGCACAGGGTGTGCGCTTTGCCACAGTGCAGTACAG  
CGATGACCCACGGTGTAGTAGGGGCCCTGGGGGCTGGGGACCACGAGATCCCCACCAA  
GACTCCTTCCCAGAGAGGGAGGAG

>1790

AGGGGCTGCAATTCTCCATGTGGCTGACCATGTCTTCTGCCCCAGCTGGCCCGACCT  
GGTGTCCCCAAGGTGATCCCTACCCCTACCATGCCTCCCAAGATGACCCCAATGAAG  
TGTCCAGGGGAACCGTGATTTGAC

>1791

AAGTCCCAGGACCTGGTGGACACAGCTGCCCAAAGGCTGAAGGGGCAGGGGGTCAA  
GCTATTTGCTGTGGGTAAAGACCGAGCAGGAGTGACAGGTCAGCTGGGGGGTGGGGG  
CAGTCAGAGAGCATGTGGGTGACTGAG

>1792

AGGACACTACTGCCCTCGTTTCCCGGAGAGTGTGCACGACTGCTGGTGGCGTGCCTG  
TGACCCGACCTCGTGAGTTCCTGCCACACGGTGTACCCTGACCTAGACCCCGGACCC  
CAATCCCCACTTGGCAGTGCTGAT

>1793

GACTGGCTACAAGGTCCAGTACACTCCTCTGACGGGGCTGGGACAGCCACTGCCGAG  
TGAGCGGCAGGAGGTAGGATGTCAGGAGTATAGGTGGTGGCTGGGGACTTGGCTGGG  
CAAGATAAAGTGACCTCTTGCCTGG

>1794

TACCAAGTGA CTGTGATTGCCCTCTACGCCAACAGCATCGGGGAGGCTGTGAGCGGGA  
CAGCTCGGACCAGTGAGCAATTCTGCCAGCCTCTGACCCCATTCACCTAACCCCGAC  
CCCAGTACCCCTCCCACTTCTGA

>1795

AGCCTCTGGTGGCCTGGCGGAGTGTGCCAGGTGCCACTGGCTACCGTGTGACATGGC  
GGGTCCCTCAGTGGTGAGTGAGAGATGTGGCTGAGGGAGTCCCCGCGCCTCAGACAAG  
GCTGTAGAGTCCTGAGTCTGCAAGC

>1796

TATGAGGTGACCGTGAGCACCTATTTGGCCGCA GTGTGGGGCCCGCCACTTCCCTGA  
TGGCTCGCACTGGTGAGAAGGCTGGGCAC TTTCTTCAGGCTGGGACGGGCAGGCAGG  
GCAAGGCCCGGAGGCCACTGACATC

>1797

TCCATCCTCCTTCTGGA ACTTGGTGCCTGAGGCCCGTGGCTACCGTTGGAATGGCG  
GCGTGAGACTGGTCA GTGCGGGGGAAGGGATGGACAGGCAAGGGTCAGGGCATGGC  
CTCTGCTGGTCTGACCCTGTTATCT

>1798

TACCGCTCACACTCTACACTCTGCTGGAGGGCCACGAGGTGGCCACCCCTGCAACCG  
TGGTTC CCACTGGTGAGGGCTCTGTGGGCTGGGCCAGTGAGTGGGGGAGGTGTCGGA  
GCCCCAGGCTGCCTCTATGCTGTGC

>1799

CGGGT GCGAGTGTCTGGAGCCAGTCCCTGGTGCCACCCAGTACCGCATCATTGTGC  
GCAGCACCCAGGGTGAGGTGGACGCAGCCAGCACCCCCACCACACACTGAAGTTC  
CAGCCTGAGGGGTCTGAGTGTACCT

>1800

TACTGTGCGGGTGTCTGCTCGAGTGGGTCCCCGTGAGGGCAGTGCCAGTGCCTCA  
CTGTCCGCCCGGGTGAGTACTGCAGGAGGCTTGTGGAGGACAGCCTGCCTGCCTCACT  
CTGGTCTGGTTCTGACTTCTGAC

>1801

CGAGTGAGGGTGGCCTGGGGACCCGTCCCTGGAGCCAGTGGATTCGGATTAGCTGGA  
GCACAGGCAGTGGTCA GTTGGGGTGTGTGGGGGGACTGCCAAAGGGACCAATGAG  
GGTATGGGTGCCAGAGGGGACAGGCA

>1802

TACCAGGTGGCTGTGTCGGTACTGCGAGGCAGAGAGGAGGGCCCTGCTGCAGTCATC  
GTGGCTCGAACGGGTCA GGCCCTGCCCCCGTCCCTTGGCTCTCTGCCTCCATTGCTCTT  
TCAGACCCCATGCCTTCCCTTGC

>1803

TCTGTCACCATTACCTGGACCAGGGTTCCTGGCGCCACAGGATACAGGGTTTCCTGGC  
ACTCAGCCACGGTGGGGACTGGGGTTTGGGAGGGGGCAGGTCAGGGTGAATGGG  
GGCTGGGGGTTTATTGGGGGTT CAGG

>1804

TATACGGTGCATGTGAGGGCCATGTGGCTGGCGTGGATGGGCCCCCTGCCTCTGTGGT  
TGTGAGGACTGGTGAGTGGACCCTGGCCAGCTACTAGCCACACCGCATTAGCTACCCT  
GCCCTGCTGTGTTCCTGATTG

>1805

GTTCTACGGATCACCTGGGTAGGGGTCACTGGAGCCACAGCTTACAGACTGGCCTGGG  
GCCGGAGTGAAGGTATGGCTCCCTGACGCCACCCCTGTCCTTCTGGCTGGGACTGCT

CACCCCTAACCATGCTGTATGCC

>1806

TACTCAGTGCAGTGACTGCACTTGTCTGGGGACCGCGAGGGCACACCTGTCTCCATTG  
TTGTCCTACTACGCGTAGGCAGAGCATGCGCTGGAGAGCTTCGGATGGGTGGTGTGGATG  
GTTTGGGGATCCGGGCTTGTGCTC

>1807

CACTCGCTGAGGCTGCGCTGGGAGCCGGTGGCCAGAGAGCAGGGCTTCCTTCTGCAC  
TGGCAACCTGAGGGTGAGAGTGTCCCCAGAGAAGTTAGGACCATTGGGGCAGGCTGT  
GGCAGACTCCGCAAGGTAGGCGAGAC

>1808

TACCGCGTGAGGCTGAGTGTCTAGGGCCAGCTGGAGAAGGGCCCTCTGCAGAGGTG  
ACTGCGCGCACTGGTAAGCCTCACCTTGGCGTGCTCCTCCCTGCTGATGACCCACCC  
TGAATTCTGCACCCCGACTCTGAG

>1809

GCCTGGACTCCAGTGTCCAGGGCATCCAGCTACATCCTATCCTGGCGGCCACTCAGAG  
GCCCTGGCCAGGGTGAGGGGGAGGCCAGGATTTGGGTGGGCTGGCAGTTGGGGCTCT  
GTGGAGACAGCTTTTTAATCAAGTT

>1810

TACATCTTCTCCCTGACGCTGTCTGGATGGTGTGCGGGGTCTGAGGCATCTGTAC  
ACAGACGCCAGGTATAGTGGGCATAGTGGGAAGGGCAGAAAGGTGTGTCTGGGTGGG  
CTGCCCGCTTCAGTAACTTGTTC

>1811

GGAGGCTACGAGGAGGGTCTGGAGCGTCTGGTGTGGCACTTGGGCCTTGGGCC  
ACAGGCAGTTCAGGTTTGGCCCTGGGGCAGCCAGATTCTACCTCTCCCTGAGGCCCC  
CACCCAGGCTCCATACCAGTTACCA

>1812

CATGACCTTGGCATTATCTTGCAAAGGATCCGTGACATGCCCTACATGGACCCAAGTGG  
GAACAACCTGGGTGAGGACTGCAGCAGGCATGGACTCCTGGGGCTATCCACTGGGAG  
CTTGGTGCCCCAGGGTTCTGACAT

>1813

ATGTTCTGCTAGTGGATGAACCCTTGAGAGGTGACATATTCAGCCCCATCCGTGAGGC  
CCAGGCTTCTGGTAAGGAGTAGGCTGATGGGGAAGGGGTCTGGGAATAGGGGTGGCC  
CTGAAAAGGCTATCATGCAGCCAC

>1814

TGGGCCAAGCCTGGACCAGGCAGTCAAGTGGTCTGGCCACAGCCCTGTGTCAGGCATC  
CTTCACTACTCAGGTTTGAAGAGGCCTCTGGGGGACTGGGTGGTAGAATATAAGGGG  
TCTGGGGGTCTTGGTAGAAATGTT

>1815

AGCAGATGGGCGTCCAGGCAGCCCTGGCCGCGCCGGGAATCCTGGGACCCCTGGAGC  
CCCTGGCCTAAAGGTGAGCAAGCCTTGTCTGCAGGTCAGGGTGGGCGCTGCTGAGT  
GGGTGGGGTGGCTCCGACTGTTCTGC

>1816

GGCTCCCGACAAGTCATCGGAGGTGAAGGACCTGGGCTCCTGGGCGAAAGGGGA  
CCCTGGACCATCGGTAAGTGCAGGGTATGTGGAGGCAAGTGATGTGTAGTGGGGGGAC  
CAACACCAGGGGGGCGAGAGTGAGG

>1817

TGGACCTCGTGGACCACTGGGGGACCCAGGACCCCGTGGCCCCCAGGGCTTCCTGG  
AACAGCCATGAAGGTGACAGCCTCATGAGTGCCATGTGATGCGGAGACCTGGTGACCC  
CATTGAACCCACATAACCCCTGCC

>1818

GCCTCCTGGAGAGAAGGGAGACCCTGGGCGGCCTGGCCCCCAGGACCTGTTGGCCC  
CCGAGGACGAGATGTAAGAGGCTGGAGTCGGGGGAGTCATGGCGGGTAAGGGAGTAG  
GGCTGTTGCCAGCATCATGGGGGTTT

>1819

GGCACCTGGAGTTCGGGGGCCTGTGGGTGAAAAGGGAGACCAGGGAGATCCTGGAG  
AGGATGGACGAAATGTGAGTCCCAGCCTATGACTCCTCACCCCAACCTTAACCCCTCA  
ACCAGCCAATTCCAATACCTGATCC

>1820

GGACCGCGGACAAGAGGGTCTCGAGGGCCCAAGGGTGATCCTGGCCTCCCTGGAGC  
CCCTGGGAAAGGGTGAGTGTGATTGGTCTCGGGGGTGCAGGCATGGGAGGGCCTG  
CTCTGATTTCTCTCCCCTATCCTC

>1821

TCCCCCTGGGCTGGATGGCCGGAGCGGACTGGATGGGAAACCAGGAGCCGCTGGGCC  
CTCTGGGCCGAATGTGAGTCTTGGTAGTCTCGCTGTTGTCCCCTTCCCCTACCCCTT  
CACATGAGGACCCCTAGACCCAGC

>1822

TGGAGCTCCTGGTATCCTTGGACCCAGGGGCCTCCAGGCCTCCAGGGCCAGTGGGC  
CCTCCTGGCCAGGTGAGTGTCTGGGTCACTTCTGGGACTTCAGAGCATTAGAAGCCAT  
GATGTTTCAATGGGCAACCCTCCT

>1823

CCTGCCTGTGCCCCAACGGCGTCGAGGCCCAAGGGGGACTCAGGCGAACAGGGCCC  
CCCAGGCAAGGAGGTGAGCAGAAGTGCTCAGTGGGTTGTGCCCCGTGGAGTGGGGT  
GTAGCTGTACAGCCACCAGCATTCTC

>1824

AAAGCCTGGTATTCCCGGGCTCCAGGCAGGGCTGGGGGTGTGGGAGAGGCAGGAAG  
GCCAGGAGAGAGGGTGAGGCTGGGGGCTGGCCAGGAGAGTGAGGGAAGAGGGGTTG  
GGAGGGGTGGGACCCCCCATGGGCTTG

>1825

GAAGCCGGGAGCCCCAGGTGAGATGGTGCCAGTGGAAAAGATGGAGACAGAGGGA  
GCCCTGGTGTGCCAGTATGTGTTCTGGGGGACGCTCGCTAGGGTGTGGTGCCCAGCTG  
TGGGCCTGAAATATGAGGAGTGGGGC

>1826

TGTTGTTGGGTTCCCGGGTCAGACAGGCCCTCGAGGAGAGATGGGTCAGCCAGGCCCT  
AGTGAGAGCGGGTGAGGGGCTGGGAACAGCATGTAGGGCATGGTGAATCCATGGT  
GGGTGAGGAGGGGGCCCTGCCTTGG

>1827

TCTGGCAGGCCCCCAGGGAGAGAAGGAATCCAGGACCCCTGGGGCCACCTGGACC  
ACCGGGTCAAGTGGTGTAGAGGTCCCTAAACCCACGATTTGATTTCTGTCTCTCG  
TGAGGACTTAGGATGGGGCGGGCC

>1828

TGAACGAGGGCCTCGGGGCTTGGATGGTGACAAAGGACCTCGGGGAGACAATGGGGA  
CCCTGGTGACAAGGTACAGGGAAGAGGGTGGTGTACTCTCTGTGGGGTCTGTGGCT



GTGGTGGTTCCACAGCTACTGTGAGG

>1829

AAAGGATGGAGTGCCTGGTATCCGAGGAGAAAAAGGAGATGTTGGCTTCATGGGTCCC  
CGGGCCTCAAGGTAGGAAAGAAACAAGATTGGTTTTTTTCTGGTCAGGAAGGCCTAA  
TGTTGAAGGGCGAGGGACCTGGGG

>1830

CTCTGCTGGTCCCCAGGGCCACCTGGCAGTGTGGTCCCAGAGGCCCCGAAGGACTT  
CAGGGCCAGAAGGTAAGGGGCCCCAGCTCTGACTCCTGATCCCTGAACCTCCCTACC  
CTTCCAACCTCATAACCATCTTCC

>1831

AGGTCCCCCGGAGAGAGAGTGGTGGGGGCTCCTGGGGTCCCTGGAGCTCCTGGCGA  
GAGAGGGGAGCAGGTGAGTAGGGATTCCAAGGCTGGGTGAGAGATCGGGGTGACTT  
CTGTTGTCCCTGAGGTCAGAGGTCAC

>1832

GCTGCAGACTGCCGGCTCCAGCTCCATGCTGTGCCTGTGCTCCGCGTCTCTCATGC  
AGAGGAGGAAGGTGAGGACAGCTGAACCCGTGGGGCAGCTATGGGTGGGGCCGAGA  
CACGCACATGGGTGTCCATGAATGC

>1833

GAGTACTCTGAATACTCCGAGTATTCTGTGGAGGAGTACCAGGACCCTGAAGCTCCTT  
GGGATAGTGATGGTGAGAATGGGGGGCTGCGCAGCGGGGTCTGGGGAGGGGCAGGCA  
GGGCTGAGCCCTGCTGACCTCCCC

>1834

AACCGTTTTGGGACCCGTGAGGCCTGCGAGCGCCGCTGCCACCCCGGGTGGTCCAG  
AGCCAGGGGACAGGTATGGGCTGAGCCCCACCGTGGGGAAGTGGGCACTGAGCCTG  
CCTGGATCGGGTTCTGGGGGAGGAGT

>1835

GATCCTCCTGCTTGTCGCCCTCTGTGGCCTATGCAGCTCCTGGCCCCGGGGATCA  
TTATCAACCTGGTAAGAGGGTCTTCAGGGGAGGCGCCTCCTGAGTCCCCAGATGAAGA  
CTTCTAAGCTTGACCTTGACC

>1836

GCATTC AAGT GCGCTGGGCCTGGCCCGCTGCACATCCATGGCCAGCGAGAACAGCGA  
GTGCTCTGTCAAGGTGGGTGCTGAGGACTTGGCGTGGGTGGGGGAGAATGGGGAGT  
AGGGCCCTGAACACTTGTGAGTGGGA

>1837

CTGGCCGCGCAGGCCCTGAGGGCTCGCGGCCCCAGTGGCGCGGCCGCGATGCGCTCC  
ATGGCATCTGGAGGTAAGTCTCGGGTCTCCGGGCGTGCCAGGGACCAGAGTGTGCCCCTCC  
CAGGGTGGTCCCAGGGCGGCAAAGC

>1838

TGTTCCCACTGATGAAGAGCAGGCGACTGGGTTGGAGAGGGAGATCATGCTGGCTGC  
AAAGAAGGGACTGGTAAGAGAACTCCCTTCTGTCTTCTGTGTAACCTATGGCCTTGG  
ATGTGTTTATAGTGGTCTCCTCTCT

>1839

GCTTCAGGCACCAGGGAAGACCCTAATTTAGTCCCCTCCATCTCCAACAAGAGAATAG  
TAGGCTGCATCTGTAAGTACCTCACCTCTATTTTTATCCACTTGCTTAATATATCCTACA  
ATAGTGTGTAAGCTGCCTCAA

>1840

CTCCAATCTATCTGCTTGGCCTGACTCAGAAATTCGGGCCATCTACAGGCTCCACCT  
TGGGCTGCAAGGTGAGAGGCTGATCTCGCTCTGGCCCTCACCATAGGAGGGGGCGGA  
GGTGACGGAGAGGGTCCTCTCTCC

>1841

AAGAGGACCATTGAGGAAGCCATGGTCAAAAAGTGGGCAGACTTTGCTGGCAGACCT  
GAGCCACTTACCTGTAAGGGCTGGGGGCATTTTTTCTTTCTTAAAAAATTTTTTTTAA  
GAGATGGGTTCTTGCTATGCTGC

>1842

AGCCCTGCTGCTGGGCATCCGTGACTCCATGGAGCCAGTGGTGGAGCAGCTGACCCA  
GGAGTTCTGTGAGGTAAGGCTGGGCTCCTGAGGCCACCTCGGGTCAGCCTTGCTCTC  
ACAGTAGCCCCCGCCCTGCCCCGCTG

>1843

TCTCCGGAGGCTGAAGCAGGCCATAGAGAAGAGGGATCACATCGTGGAGATGCAGCT  
GAGGCAGCACAAAGGTGGGGACTGTACGTGGACGGCCTCCCCTCGGCCACAGCCAGT  
GATGCTACCGCCTCAGCATTGCTAT

>1844

AAGAGGACCATTGAGGAAGCCATGGTCAAAAAGTGGGCAGACTTTGCTGGCAGACCT  
GAGCCACTTACCTGTAAGGGCCGGGGGCATTTTTTCTTTCTTAAACAAATTTTTTTTG  
TTAGAGATGGGGTCTTGCTATGT

>1845

AGCCCTGCTGCTGGGCATCCGTGACTCCATGGAGCCAGTGGTGGAGCAGCTGACCCA  
GGAGTTCTGTGAGGTAAGGCTGGGCTCCTGAGGCCACCTCGGGTCAGCTCACCTCTC  
ACAGTAGCCCCCGCCCTGCCCCGCTG

>1846

CCATTGAGGAGGAATTCTCTCTCCTCACCTGCAGCATCAATGTTACCTCACCTTCGGAG  
ACAAGATCAAGGTGCCTCACAGCCCCTCAGGCCACCCCCAGCCCCTCCCTGAGCCTC  
TCCTTGCTCCTGAACTGAAAGTAC

>1847

GTATCCAGGAGGTGTTAAAAACCTGGAGCCACTGGTCCATCCAAATTGTGGACAGATT  
CCTTTTCTCAGGGTGAGGACCTGGAGCCTAGACACCCTGGGTTGTGGGGGAGAGGC  
TGGGGTGGAGGGAGAGGCTCCTTCC

>1848

AGGTCTCCGGAGGCTGAAGCAGGCCATAGAGAAGAGGGACCACAAGAGAGAACAGC  
TGAGGCAGCACAAAGGTGGGGACTGTGTGTGGACGGCCTCCCCTCGGCCACAGCCAG  
TGATGCTACCGCCTCAGCATTGCTAT

>1849

GATCGGTGGCACTGAGACCACAGCAAACACCCTCTCCTGGGCCGTGGTTTTTTTGCTT  
CACCACCTGAGGTGCGTCCTGCGGACAAGCAAAAGGCTCCTTCCCAGCAACCTGGC  
CAGGGCGGTGGCCACCCTCACTCAG

>1850

CACCACAGAGATTAACCTCAAGGTTGGGGAGGAGTTTGAGGAGCAGACTGTGGATGG  
GAGGCCCTGTAAGGTGAGTGCCAGAAGGGGCTCCAGGGTCATGGCGTCATTGCCCTGC  
CTCTCAACCTGCCATTTTCCAGGCT

>1851

GCTCTGAAGGGAGAGGGCCCCAAGACCTCGTGGACCAGAGAACTGACCAACGATGG  
GGAAGTATCCTGGTAAGTCTGCCTCCTCCCCTAATAAGCAAACCCAGTGCTACCTT

CCAAGATTCTCTGGGAGACCCAG

>1852

GACGTGACCATGGAGAAGCTGTTGTGTTTCTTGGTCTTGACCAGCCTCTCTCATGCTTT  
TGGCCAGACAGGTAAGGGCCACCCAGGCTATGGGAGAGTTTTGATCTGAGGTATGGG  
GGTGGGGTCTAAGACTGCATGAA

>1853

GCTTTTTGACCACGCTATGCTCCAAGCCATCGCGCGCACCAGCTGGCCATTGACACCT  
ACCAGGAGTTTGTAAATTCTTGGGAATGGGTGCGGGTCAGGGGTGGCAAGAAGGGG  
TGACTTTCCCCACTGGGGAAGTA

>1854

CCAGACCTCCTTCTGCTTCTCAGACTCTATTCCGACACCCTCCAACATGGAGGAAACG  
CAACAGAAATCCGTGAGTGATGCCGTCTCCCCTAGGCGGGGATGGGGAGACCTGTG  
GTCAGGGCTCCCGGCAGCACAGCC

>1855

TGACACCTCGGACAGCGATGACTATCACCTCCTAAAGGACCTAGAGGAAGGCATCCAA  
ACGCTGATGGGGGTGAGGGTGGCGCCAGGGGTCACCAATCTTGAACCCCACTGGCT  
TCGAGGGCTGGGGGAGAGAAATACT

>1856

GGAGCATGTGAATGCCATCCAGGAGGCCCGCGTCTCCTGAACCTGAGTAGAGACACT  
GCTGCTGAGATGGTAAGTGAGAGAATGTGGGCCTGTGCCTAGGCCACCCAGCTGGCCC  
CTGACTGGCCACGCCTGTCAGCTT

>1857

CCTCACCAAGCTCAAGGGCCCCTTGACCATGATGGCCAGCCACTACAAGCAGCACTGC  
CCTCAACCCCGGTGAGTGCTACGGCAGGGCCTCCAGCAGGAATGTCTTAATCTAGG  
GGGTGGGGTGCACATGGGGAGAGA

>1858

AGCCTCCTGAGAAGATGCAACCAATCCTGCTTCTGCTGGCCTTCCTCCTGCTGCCAG  
GGCAGATGCAGGTGAGTGACCGTCTCCACCCTCGGGGGCCCAACCCGATCCCACAGG  
TCTCCTGCCCTTCTCCACATTCC

>1859

ACGCCATTATTACGACAGTACCATTGAGTTGTGCGTGGGGGACCCAGAGATTA AAAAG  
ACTTCTTTAAGGTAAGACTATGCACCTGCCTGGATTGGCTCTTGGGAGAAAGATCTTT  
GGGGAATATCTGAGACCTGGAGA

>1860

AGCCTCCTGAGAAGATGCAACCAATCCTGCTTCTGCTGGCCTTCCTCCTGCTGCCAG  
GGCAGATGCAGGTGAGTGACCGTCTCCACCCTCGGGGGCCCAACCCGATCCCACAGG  
TCTCCTGCCCTTCTCCACATTCC

>1861

TGTGAAAAGACCCATCCCCATCCAGCCTATAATCCTAAGAACTTCTCCAACGACATCA  
TGCTACTGCAGGTGAGGCACACTCCTGCCACTCTTGCTCTTCTTGGTCCAGTTGGTTCC  
ACTCCCCCTGGAATGCCGGCCC

>1862

CTCTGAAGAGGTGCGGTGGCTTCTGATACAAGACGACTTCGTGCTGACAGCTGCTCA  
CTGTTGGGGAAGGTGAGGAGCAGAAAACAGCCACACCCTCCTGGAAACACTCCACA  
GAGACCCCTGCCTTCTTCCAAGGA

>1863

TGTGAAAAGAGCCATCCCCATCCAGCCTATAATCCTAAGAACTTCTCCAATGACATCA  
TGCTACTGCAGGTGAGGCACACTCCTGCCACTTTGCTCTTCTGGTCCAGTTGGTTCC  
ACTCCCCCTGGAATGCCGGCCC

>1864

ACGCCATTATTACGACAGTACCATTGAGTTGTGCGTGGGGGACCCAGAGATTA AAAAG  
ACTTCCTTTAAGGTAAGACTATGCACCTGCCTGGATTGGCTTTGGGAGAAAGATGTTT  
GGGGAATATCTGAGACCTGGAGA

>1865

CATGGTCTCTTTGGGCGGAAGACAGGTCAGGCCCTGGATACTTTACACAGCCGCCA  
ATAAGAACAAAAGGTAAGAGTCACTTGTTAAATAAAAACAACAAAATGCAGGAATATA  
ACATGTGGCAAACATCAGGAGTG

>1866

CATCGTCCCCCTGGGTGTGACCCATATGACATCCCGTGACATCGAAGTACAGGGCTTCC  
GCATCCCTAAGGTAGGCCTGGCGCCCTCTCACCCCAGCTCAGCACCAGCACCTGGTG  
ATAGCCCCAGCATGGCTACTGCC

>1867

CCTGCCACTGCCCCGGGCTGGGCAACCTGCTGCATGTGGACTTCCAGAACACACCATA  
TGCTTCGACCAGGTGAGGGAGGAGTCTGGAGGGCGGCAGAGGTGCTGAGGCTCCC  
CTACCAGAAGCAAACATGGATGGTG

>1868

CGGCCGACCGCCCGCTGTGCCATCACCCAGATCCTGGGTTTCGGGCCGCGTTCCCA  
AGGCAAGCAGCGGTGGGGACAGAGACAGATTTCCGTGGGACCCGGGTGGGTGATGAC  
CGTAGTCCGAGCTGGGCAGAGAGGG

>1869

AAGAAGTCGCTGGAGCAGTGGGTGACCGAGGAGGCCGCTGCCTTTGTGCCGCTTC  
GCCAACCACTCCGGTGGGTGATGGGCAGAAGGGCACAAAGCGGGAAGTGGGAAGGC  
GGGGGACGGGGAAGGCGACCCCTTACC

>1870

CCCTCGCTTCTCAGGCTGCTGGACCTAGCTCAGGAGGGACTGAAGGAGGAGTCGGG  
CTTTCTGCGGAGGTGCGGAGCGAGAGACCGAGGAGTCTCTGCAGGGCGAGCTCCCG  
AGAGGTGCCGGGGCTGGACTGGGGCC

>1871

CAGGATGACCTGGGACCCAGCCAGCCCCCGAGACCTGACTGAGGCCTTCTGGC  
AGAGATGGAGAAGGTGAGAGTGGCTGCCACGGTGGGGGGCAAGGGTGGTGGGTGA  
GCGTCCCAGGAGGAATGAGGGGAGGCT

>1872

GGGATGGTGACCACCTCGACCACGCTGGCCTGGGGCCTCCTGCTCATGATCCTACATCC  
GGATGTGCAGCGTGAGCCATCTGGGAAACAGTGCAGGGGCCGAGGGAGGAAGGGTA  
CAGGCGGGGGCCATGAACTTTGC

>1873

CATCGTCCCCCTGGGTGTGACCCATATGACATCCCGTGACATCGAAGTACAGGGCTTCC  
GCATCCCTAAGGTAGGCCTGGCGCCCTCTCACCCCAGCTCAGCACCAGCCCCTGGTG  
ATAGCCCCAGCATGGCTACTGCC

>1874

CACCCGAACACTTCTGGATGCCAGGGCCACTTTGTGAAGCCGAGGCCTTCTCTGC  
CTTTCTCAGCAGGTGCTGTGGGGAGCCCGGCTCCCTGTCCCCTTCCGTGGAGTCTTG

CAGGGGTATCACCCAGGAGCCAGG

>1875

GGGAGCAGGGTTATGAGCACCTGCACCTGGAGATGCACCAGACCTTCCAGGAGCTGG  
GGCCATTTTCAGGTAAAGCCCTCCCTGGCCCTCGCTGGGAACACCCAGATCCCTGCC  
CCTGCTGCCAGGACCTGCCAGGC

>1876

GCAGGATGATCCTGGAGCCCTGGGTGGCCTACAGACAACATCGTGGGCACAAATGTGG  
CGTGTCTTTGTTGTAAGCGGCGAGTTGGGAGCTGAGAGCTGGGAGCAGGGTGGGCAG  
CCTGGGTGTAGGGGGGAGGCGAGAG

>1877

GTGCTGCAGAACGCCCGGGGAGCCTGACCCTGGACGTCCAGCCCAGCATCTTCCACT  
ACACCATAGAAGGTGTGGGCCATGCGGGAAGGTCCAGCCCCAGAGACCCTGGAGTGG  
CCAGGGATGGGGATGGAGGACTGAA

>1878

CTGTCTCGTGGATCAGCCCCAAGGTGTGGAAGGAGCACTTTGAGGCCTGGGACTGCA  
TCTTCCAGTACGGTGAGGCCAGGGACCCGGGCAGTGCTATGGGGAAGGGACACCATG  
GGGGCCCAATTTCTCCTTCTCCACC

>1879

GAAGGCGGAACTGTCACTAGAAGCCATCAAGGCCAACTCTATGGAACACTGCAGG  
GAGCGTGGACACGGTCAGGCCAGCAACCAGCCCCACCCAGAGAGGGTGTATGCCAAG  
CCTGCCTCCCAGGCACTGCCTGCCAAT

>1880

TCAGTGAACATCCCCAGAAGGCAACCACCGAGCTGCCCTTGCTGCGGGCGGCCCTCA  
AGGAGACCTTGAGGTGGGTGCTGGCTGAGGCCTCCCTGTGGCCCTGGCCCCCTGCTG  
GAGAGCAGCCCCACTGGGTGGTGGC

>1881

TGTGGTCTGTTTTTGGAGCGAGTGGTGAGCTCAGACTTGGTGCTTCAGAACTACCAC  
ATCCCAGCTGGGGTGAGTGAGCCCCACACCCCTCGAGCTGAGAACCTCCCTCCCCAGT  
CATTCCCTGATCCCTGCTCTGCAC

>1882

TGGCTTTGGCATGCGCCAGTGCCTCGGGCGGGCCTGGCAGAGGCAGAGATGCTGCT  
GCTGCTGCCACGTAAGCAGGCCTGGGGCGGGGGCGGGACCTGGGCAGCAGAGG  
CGGGACCTGCACACTGGGGGCGGGGCT

>1883

TTTCCCGCTTCCATCATCGGGAACCTCTTCCAGTTGGAATTGAAGAATATTCCCAAGT  
CCTTACCCGGGTAAGAGAAATAGTGTGATTTAGGGAGAATAACTCAGCAATTGGAT  
CTGGTATGTGTATTCAACTC

>1884

CTGCTGGACTACAAGGACGAGTTCTCGGGCAGAGGCGACCTCCCCGCTTCCATGCGC  
ACAGGGACAGGGGTGAGTCCGCGTCCCTGGCACGGAGCGGGGGTGCATAACACGCC  
CCGGGACAGTTACGGGCGCTAGCCA

>1885

AAACAGGGCAATGAGAGCCGGATCCAGAGGGAGGCCCACTTCTGCTGGAAGCACTC  
AGGAAGACCAAGGTGCGTATCTGCTGCCTAGCAGGGCCAGTCCTTTCAGACCAG  
CGGTGTGGGGAGCCCTGGCTGGGAC

>1886

TGAGAAGTTTCTAAGGCTGATGTATTTGTTAATGAGAACTCCACCTACTCAGCACTC  
CCTGGCTCCAGGTGAAGCCACTTTCCTCTTTCATCAGTCATCAACTGTAGAGTTTACGT  
TAGAAAAAGAAGGAAAATTTGG

>1887

GCACCATCAATCTCTGGACCCCAACTGTCCCCGGGACCTCACCGACTGCCTGCTCGTG  
GAAATGGAGAAGGTAGGCTCGGCCTCCCATGATGTGGGCTCTCCGGGGTGGGCAGAG  
AATGCACAATTTAGATTACAGAG

>1888

GGGACAGAGACCACCAGCACAACTCTGAGATATGGGCTCCTGATTCTCATGAAATACC  
CTGAGATCGAAGGTAGGCAAGTACTGAAGGGACACCGTGCCTGCGGCTGCATCTCC  
CTGGATGGCCAGCCTTGCACATTTT

>1889

CCTCGTGCCCTCCAACCTGCCCCATGAAGCAACCCGAGACACCATTTTCAGAGGATAC  
CTCATCCCCAAGGTTAAGCAATGAGCCTGCAGCACACAGCATGAACACCATCCTATCA  
CTAATCGCCTTCCTGCCAGGGAGC

>1890

AAGCCAGAACACTTCTGAATGAAAATGGAAAGTTCAAGTACAGTACTATTTCAAGC  
CATTTTCCACAGGTGAGAAAGATCAGAGGCAGTACCTTCCCTTGAGGAGCAGCCCACA  
CTCCTCATCTCCCCTCCACATGTG

>1891

TCTGGGGAAGACAACCAGGACCTTGCTATCTCCTTTGCAGGAAATGGACTCTCTGCTC  
TTAGAACCTCAGGTAGGAGACATCAATCTTGACATCTGCAAATCTAGAAAAAAGG  
ATTGGAGAAAGGATCTGGAGTCAA

>1892

CTAACCAGCGCGCGCGTTCGACGTCGAGCGGACAACCTGCTCGACGACCTGCAGC  
GGCTCAAGGCCAAGTGAGGGCCCGCACCCAGACTCCTCTTCTGCGGGCAGGGCA  
CAGGAGGCTAGGCCTGGGGGCTGGGG

>1893

CATTGACCTGGAGCGCAGAATTGAATCTCTCAACGAGGAGATCGCGTTCCTTAAGAAA  
GTGCATGAAGAGGTATACTTGGCCCCTTCTCTGGGGTCACTGGGCCATTGGGGAAAG  
CAGCCGAAAGTGGGGTTGGGGT

>1894

TATCCGGGCTCAGTATGAGACCATCGCGGCTAAGAACATTTCTGAAGCTGAGGAGTGG  
TACAAGTCGAAGGTGGGTGGCCTCGCCGGGGACTGGGATCTCCGTCCCCCTGGAATC  
CCAAGGCCTTTGGATTGTTGCTTG

>1895

GCAGGAGATGATGGAATACCGACACCAGATCCAGTCTACACCTGCGAGATTGACGCC  
CTCAAGGGCACTGTGAGTCCCTGCCACCTGGGCCAGGCCCTGCCCTTCTCTGTCTG  
CAGTTCACACCCTCACTTTGTGAC

>1896

TCAACGTGAAGATGGCCCTGGATGTGGAGATTGCCACCTACCGGAAGCTGCTGGAGGG  
AGAGGAGAGCCGGTGAGGGGCCAGGCAGGAGCCGAGTGGGAGGTGCGGGGTGCTGG  
GTGGTCCATTTCTGTCCCAGGAGGC

>1897

GCAAAGGGTTCTGAGGTCCATACCAAGAAGACGGTGATGATCAAGACCATCGAGAC  
ACGGGATGGGGAGGTAAGTGGTCTGTCTGGGCTCCTTACCCTTGGTTGGGGCTATGGA

TGTGTCTGGGGGACTGTCTTCCAC

>1898

CCAGTGTGTGAAGCTGAATGATGGTCACTTCATGCCTGTCCTGGGATTGGCACCTATG  
CGCCTGCAGAGGTAACAATTAATATTTTAGTGTGAGAGTTCAAAGGAGCTAGAGTAA  
GTGGAAGCTGACCAGGTTGTCAG

>1899

AAGGTCACTGAAAAATCTTCAATTGGACTATGCTGACCTCTATCTTATTCATTTCCAGT  
GTCTGTAAAGGTAGGCAGCTTGTGTGATCAAATTAATTTCACTTTTGTTCAGCATAAA  
TATTGTTTTTCATGGAGATTT

>1900

GGAAGTGATCCAAAAGATGAAAATGGAAAAATACTATTTGACACAGTGGATCTCTGT  
GCCACATGGGAGGTGAGTGTGGAGGTGAGAGAACGGATAAGAAAGATGAGGTAGG  
ATACATCTGTTTCTATCTTCTTAG

>1901

CTTCAACCACAGGCTGCTGGAGATGATCCTCAACGAGCCAGGGCTCAAGTACGAGCCT  
GTCTGCAACCAGGTGAGGCGCCCTCAGCCTCCTCTGCCTTTCTGTTCTTCATGCCCTG  
CTTTCTGTCCTATTGGCCAAGTA

>1902

ATTTCTGCAAGTCAAAGACATTGTTCTGGTTGCCTATAGTGCTCTGGGATCCCATCGA  
GAAGAACCATGGTAATAAGAGATACAGGAAGTTGCCGAAAACACTGGTATGATAAAA  
AAGCTGGGAGAAAAAGGGATCAT

>1903

CCAGCTGCAGCGTGGGGTTGTGGTCCTGGCCAAGAGCTACAATGAGCAGCGCATCAG  
ACAGAACGTGCAGGTGAGGAGCGGGGCTGTGGCCTCAGGTCTCCTGCACAGTGTC  
TTCACACGTGTGCTTCTTGTAAAGCT

>1904

AGTTGACTTCAGAGGAGATGAAAGCCATAGATGGCCTAACAGAAATGTGCGATATT  
GACCCTTGATATGTAAGTGATTTTGGAGATGGTTGTTCTAATTTATTTAGAGGAGGAA  
CGTAGGATGGGTGTTGAGAGTGT

>1905

GGCCGTGCGCACCCAGGAGAAGGAGCAGATCAAGACCCTCAACAACAAGTTTGCCTC  
CTTCATAGACAAGGTGAGGGTCCCCTGCGTGGCTGACTGTGCCCGCAGCCCCTTTCT  
CCTGGTAGTCCCGGTCCCTATGCAC

>1906

GCCAGGAGAAGCTGAAGCTGGAGGCGGAGCTTGCAACATGCAGGGGCTGGTGGAG  
GACTTCAAGAACAAGTGAGCAACTCCACCCTCCACCAACTGAAGTCACCTGCTCTCC  
TCCACCCCTTGACCTTGGGACTAAGT

>1907

GGTAGAGCTGGAGTCTCGCCTGGAAGGGCTGACCGACGAGATCAACTTCTCAGGCA  
GCTATATGAAGAGGTATGTTCTGGTTCGCAGGAGAGTGAGGGTCCCAGCCTTGTGAG  
CGCCTCCACCCTGAGACTCAACCAG

>1908

GACTGAGATCTCTGAGATGAACCGGAACATCAGCCGGCTCCAGGCTGAGATTGAGGG  
CCTCAAAGGCCAGGTATGGGCCGGGTTGGGGGTGGGAGGGTTCCTTGGACACAATCCT  
GGTGAGAGGAGATAATGTAGGAAGA

>1909

TGAACGTCAAGCTGGCCCTGGACATCGAGATCGCCACCTACAGGAAGCTGCTGGAGG  
GCGAGGAGAGCCGGTGGGTGTGGGTACCTCTGACCGGACCTGCTTCCCTATCCCTGGG  
ACCTGGGGTGGGGACGGTGGGAGCC

>1910

CCACTACTGGTCCAGAAGCAGCTGTAGGTGCCACCAAGCCCATGACGACGCTGCTG  
GCCAGGGTCCAGGTGAGCGGCGGCACCGCGGGGAACGGCCACTTTCACGTGCAGAG  
GCCACCCACCCGACCGCCGGCCGGG

>1911

AGCTGCTCTTCTGGGGTATCGCGATCCACTTAAGGATGAGGCAGACTTGGTGACAAGC  
TGGTCTGAGCAGGTATGGGAGCCCCCTGGGGAGACGGAAGAAGGGAGGAAGTTGCCT  
TCTGCCTGGGGAGGGTTTGAGAGGG

>1912

CGCCTTAATGCCAGCGGCTGACTGGCCAAGGTGGCCAGGGAGCAGGTGATGGA  
CACCTTAGTTCGGGTAAGTTCACACTTCAGGGAAGCCGTGCCCTAACCACCATGAG  
CCAAAGCCCCATCCCTGCCTGACC

>1913

TCATGGTGCTGCAGGAGGTGGTGGACTCTCCGGCAGCGCCATCCCGCTCCTGCTTCG  
AGAACTCAATCGGTGAGGAAGATTCTGTGGGTCTAATCAGGGGCACACCCAGAGGCTT  
GAGGCCCTGACCCCGCCTCCCTT

>1914

CCTACAGCACCTGAGCAGCCCCAGCTGGGGCGCAGCACCTACATGGAGACGTATGT  
GTACTTCTATCGGTGAGCACGGAGCTGGCAGCGCAGCAGGGTGGGGGGCGTCTTG  
GCCCTAATGTGAGGTAGGCTCATTA

>1915

GTGTACAACGATGAGGATGACGTCTTTGCCGGGAGCCATTTGTGGCCAGTTCTCTTT  
GCCAGCAATGGTAGGAAGGGAAGGGTGGGCTTGGTATGTGGGAGCAGAAGGGGAGT  
TCTGGCTGGCTCCACTGGGGGCTT

>1916

GGCCGTAGAGAAGGAGCTGAACGCCCTCTACGATGTGTTTCTGGAGGTCTCCAGCAC  
TGGCAGAGCAAGGTAGGCCTGGGCAGTTTGTACAGGAGGGACAAGGATAGGGTGGCC  
CAGCGGCCAGCCTGATGGCTGCTGT

>1917

CTGCCGAGTCTGCTGCACACTGCGGCTGCCTTTGACTTCCCCACGAGCTTCCAGCTC  
ACCGAGGAGGAGGTGAAGGGATGGGGCTGGCATGAGGAGGGAGGGCAGCAGCAGGG  
TCACAGGGAAGCCCCTCGGCCCGGG

>1918

GGAATGGCCAGAGTATTTTATGGCTGTGGCCTTCTTATCAGCACAGAGAAGCAAAGATC  
CAAATCCCAGGTAATGAATTCACGGGAGAATGCTTAGATACTCACAGCAAAGAG  
ATTACTGCACATGAGCAGAAAGG

>1919

GGGTGCAGTGATGACGTGTTGCCTTGGAGAAGGACAGCAGAGAATAAGCTGGACACC  
AAATACCGTACGGTAGGGCAAGTTTATGTCCCATTCTGCTTAGTGACATAGCCTGGT  
GAGTGCCTAATTAAGAAAGTTGGT

>1920

GTGAAAGGCTGTAGTATGTATGTTGCCTTGTTCCCTGTAATGAATGCGCTAAGCTCATC  
ATCCAGGCAGGTAGGAACCGGGTCTTCCATTTGTCACATTTGCATTGCTGCCTGCTCG



TCAGTAGCTCATTGCTGATGT

>1921

ATAAATACCATGATAGTGACGAGGCAACTGCTGCGAGGCTCTGTTTAATATGGCCGGG  
GTGACATTCCGGTAAGTGGGGAGAATGCGGGCGGGGGGACGGGTAGGGTGAAGGCT  
GATGAAGAGATGTATTTGACCTTG

>1922

CGCCGTGATGCTGTCCCGATCCCGCTGTGTGTCTCGGGCGTTCAGCGCTCCGCTCTCCG  
CCTTCCAGAAGGTACGGTCTGGCCGAGCCGGGGCCCCGACGGGTGAGGAGTCTGTTG  
GCGGGCAGAGAGGCGGCCTGGAAG

>1923

GACTTGTTACAGTCAAACCCCAGCGTTTGCAGAATCTGTACAGAGGGAGATGTCA  
GGTGGGAGAAAGGTAAGATTTAGTTTCTATTTTTTTTTTTTTTTTTTTTGGAGACAGAGT  
CTTGCTCTGTTCCAGCCTGGA

>1924

GCTCTTTTGGTACCTGATGGGGGAAAAGTGAAGGAGGCACTCCACTTTTCACACTCA  
GGAAAAGTGGTGGTAAAGAAGTTCTCTGGTGGTCAAGGTCTCCAGTGTCCCTCTTG  
GGATTGGGACTGAGCATAATGTGC

>1925

CCTGCAGCACCCATACCCACTCAGATGCCACCGGTGCCCTCGCCCTCACAGCCTCCTTC  
TGGCAAACCTGGTAGGCTTCCAACCTCCACATGTCATGTGGGAGAACATCTCGTCTAAT  
ATGTTCTTCAAAGGGTAAACT

>1926

AGTAAAACCCACTGTTGCCCCACCACTAGCTGACGCAGGAGCTGGCAAAGGTCTGCG  
TTCAGAACATCGGGTAAGCCTCTGAGGACCACTTTCAGGAAAGAGGCAGGGGGCAGT  
GTTGAGATTAGTGGAGTATGGGTGTG

>1927

TTGCTCAGCGTCTGAAGGAGGCCAGAATACATGTGCAATGCTGACAACCTTTAATGA  
GATTGACATGAGGTAGTGTCTCTAGTCCCTCTTATCCCCTAGGCCCTTTTTCTTAGAGA  
ACACGAACTTGCCCCACTCCTT

>1928

CTAGGCTTCATGTCGGCATTGTGAAGGCCTCAGCCTTTGCCTTGCAGGAACAGCCTGT  
TGAAATGCAGGTGAGTTGCTTGTGGCTGGAATTGGAGAGGTCCTGGGAGGTAGGTGT  
ATGAGCACAGACCTGCTCCCACA

>1929

TGACGACACAACCAAAGAGGTGGTGTATACGGATTATATTGACATCAGTGTTCAGTG  
GCCACCCACGGGTATGTTGGGGCAGGAGGTGGGGAATGTTGGTCTTAGACCCTCACC  
TTATCTGTGTGAAGGAGATCACAC

>1930

AGTCATCAGGAATGTGGAAGCTATGAATTTGAGATATTGAACGGACCATCACTGAAC  
TGGGAGAGAAGGTAAAGTAGAAAGATGTATACAAGCTGCTAAGCAGGCGAGGGAAGA  
GAGCCTTCAGAAGGCTGGGCTCAC

>1931

CAACCCCTCAGTCTGCCATCCTGGGGATGCATGGCATCTTTGACAGGCCAGTGGCTA  
TAGGAGGCAAGGTAGGAACCGTCACTTCTAAGGTCCTAGTGGCTAGGTCTCGATGAAA  
GGGAAATCCAATAAATGCTAAT

>1932

AGAATGGTGCCTGCTGCTGTCTCTGCTGCTGCTTCTGGGTCTGCTGTCCCCAGGA  
GAACCAAGATGGTGAGTGGGGAAAGCAAGGGATGGGTGCTGGAGAGGACTGGAAGG  
AGGTGAGGAACAGGACATGTGGCTG

>1933

CAGAAGGCCAGGGAGGACATCTTTATGGAGACCCTGAAAGACATCGTGGAGTATTACA  
ACGACAGTAACGGTCAGTGAATAACAGACCACAGGGGTGGAAGGTCTAACCCAAGAG  
GCAGCCCCCAGTGTGAGTGCCAA

>1934

CTGGAGGAGGAGTGCCTGCGACTCTGCGGAAATACCTGAAATACAGCAAAAATATCC  
TGGACCGGCAAGGTACTCACTGCTTCTGCTCCCCAGTACTGAGCCCAGAATAAAGA  
CGATCTCAGGCTAGGAGCTCAGGC

>1935

GGCTGTTCTCGGGCATCGCCTGCACTTGGCCGTACGTCTGGCTTCAGATCCATCCCA  
GAGCTTCAAAGGTATAGATAGGCAGGGACAGGGAGGGAGAGAAGGGAGGAGCCCTTG  
GAGGCTAGAAGGGAAGTCAGATCT

>1936

GACGTAAGGGACTCAAATCCGTGGCCGCTGCCCGGGAACGCGTACTGAGGGCCGC  
GTGGACGTGCTGGGTGAGCCTCTGGAAGCATATGGGCTCTAGGAGCCTTCTCCGCC  
CTGCGTTGAAACCAACATGTTCCCA

>1937

TTCCTGCCAGACATGAAGAGGCGCGTTTCGGGACGCGTGTGGTGACCGGGAGCGTG  
GGAGGATTGATGGGTGAGTGGTAGGGAGTGGCCTCGGCAGCTCCAGATTCTTTGTGTG  
CGGAGCTGAGCCTGAAGGCAGGTT

>1938

GCGCCAGCAAGTTCGCGCTCGAAGGCTTATGCGAGAGTCTGGCGGTTCTGCTGCTGCC  
CTTTGGGGTCCAGTGAGTCAACACCCCCGTTCCCCGAACCCTCTTA ACTCTGACCTAG  
AGATGCCGAGCACCTGTCCTGCG

>1939

CTACCAATACCTCGCCACAGCAAGCAAGTCTTTCGCGAGGCGGCGCAGAACCCTGA  
GGAGGTGGCGGAGGTGAGCGCCGGGCTGGACTCCAGGAGTGGGGGCGGTGCGTCTCT  
CCGGCCGGCAGCGGTGGCCACAGCTCT

>1940

TTCAGAATGGATTATTTGCTCATGATTTCTCTCTGCTGTTTGTGGCTTGCCAAGGAGCT  
CCAGAAACAGGTAGGCACGCTCGTTGACTTGTAAGTCTCGGAATTACAAGTTAGTGTG  
TTCTTATCCACCTTCATGCTTT

>1941

GCTCGTCCCTGATGGATAAAGAGTGTGTCTACTTCTGCCACCTGGACATCATTGGGTG  
AACACTCCCAGTAAGTCTCTAGAGGGCATTGTAACCCTATTCATTATTAGCGCTGGC  
TCCACTGGAGCCCAGTTTTAGA

>1942

GTATTTATCAGCAGTTAGTGAGAGGAAGAAAAATCAGAAGAAGTTCAGAGGAACACCT  
AAGACAAACCAGGTAAGAGGGAAGGAAGAAAAATTAGGTAAGAGGTTACAAGAAC  
AACTAGCCCCAGTCAGTGATGCCAGC

>1943

CCATCTGATCTATAAATGCGGTGGCATCGACAAAAGAACCATTGAAAAATTTGAGAAG  
GAGGCTGCTGAGGTATGTTAATACCAGAAAGGGAAAGATCAACTAAAATGAGTTTTA

CCAGCAGAATCATTAGGTGATTTC

>1944

CTATGTGACTATCATTGATGCCCCAGGACACAGAGACTTTATCAAAAACATGATTACAG  
GGACATCTCAGTTGGGATTAATAATTCTAGGTTTCTTATCCAAAAGGCTTGCTTTGT  
ACACTGGTTTTGTCATTTGGA

>1945

CCCCGACACAGTAGCATTGTGCCAATTTCTGGTTGGAATGGTGACAACATGCTGGAG  
CCAAGTGCTAACGTAAGTGCTTTCAAGACCATTGTTAAAAAGCTCTGGGAATGGCGA  
TTTCATGCTTACACAAATTGGCAT

>1946

ATCCTACCACCAACTCGTCCAAGTACAAGCCCTTGCCTGCCTCTCCAGGATGTCTA  
CAAAATTGGTGTAAGTTGGCTGTAAACAAAGTTGAATTTGAGTTGATAGAGTACTGT  
CTGCCTTCATAGGTATTTAGTAT

>1947

TCGTCGTGGCAACGTTGCTGGTGACAGCAAAAATGACCCACCAATGGAAGCAGCTGG  
CTTCACTGCTCAGGTAACAATTTAAAGTAACATTAAGTTATTGAGAGGCTAAAGTCAT  
TTGAGACTTTGGATTTGCACTGAA

>1948

GCTGCCATTGTTGATATGGTTCCTGGCAAGCCCATGTGTGTTGAGAGCTTCTCAGACTA  
TCCACCTTTGGGTAAGGATGACTACTTAAATGTAAAAAAGTTGTGTTAAAGATGAAAA  
TACAAGTGAACAGTACTTTGGG

>1949

AGCAGCTTCTTGATCGTGGTGGTGTTCCTCATCGCTGGGACGCTGGTTCTAGAGGCAG  
CTGTACGGGAGGTGAGTGAACAGGTGACCTGCTGGGCTGGGTTGGACTAAGGGGAG  
ACCCTCTGGGACACCCTGGGCCAGG

>1950

GGGCATCCCTGGGTGCCAGACCTGCCGCTACCTCCTGGTGAGAAGTCTTCAGACGTTT  
AGTCAAGCTTGGGTGAGTGGCCTATGGCTGAGGCTGAGGTGGGAGCATGGAACGGGT  
GTGGGATATGCCCCAGCATTGCTA

>1951

TCGAATCCAGTGTCTGTGACGCGCTCAACCAGGGTCAAGTCTGGATTGGAGGCAGG  
ATCACAGGCTCGGTAAGAGAAGTGTGAACACTAAATGGGGTGCACCTGCTGATCTCAG  
CCAGCACTCAGCTTGCATCAGATT

>1952

AACTTTGCGTACTGGGCTGCTACCAGCCCTGGTCCGCGGTGGTCACTGCGTGGCCC  
TGTGTACCCGAGGTGAGGTGGGGCTGGGGATGAACGATGGAAAGGTCTGGGAGATGG  
GAAGTGCCCCAAGGAGGAGATGCTA

>1953

CCTTCGAGCTCCTTGTGCGCGCTGTTGGTGTCTGCTGCTGCTGACGCAGCCAGGGC  
CCATCGCCAGCGGTGAGAGCGCATGGCGCGGGACGCACTCGCACTCGGGCACAGA  
GGTGCATCCCAGCCTCTGCGGGGTC

>1954

TTCATCCAAAATGATCAGTAATCTGCAAGTGTTCGCCATAGGCCACAGTGTCCAAG  
GTGGAAGTGGTGAAGTTCTGTGCTGCTGTGTCCGCTGTGACCTTGGAAGAGAGAAA  
TCCCGCAGCCTGGGTCTTCAACC

>1955

ACGGGAAGGAAATTTGTCTTGATCCAGAAGCCCCTTTCTAAAGAAAGTCATCCAGAA  
AATTTTGGACGGGTACTIONTGTACTTTGATCTTTGTGGTTTCTAAATCTGATCTAGGGAGA  
CCATAGACTTCACAAGGTCTTT

>1956

ACGCCTCATCTGTGACAGCCGAGTCCTGGAGAGGTACCTCTTGGAGGCCAAGGAGGC  
CGAGAATATCACGGTGAGACCCCTTCCCCAGCACATTCCACAGAACTCACGCTCAGGG  
CTTCAGGGAACTCCTCCAGATCCA

>1957

CTGCAGCTTGAATGAGAATATCACTGTCCCAGACACCAAAGTTAATTTCTATGCCTGGA  
AGAGGATGGAGGTGAGTTCCTTTTTTTTTTTTTTCTTTCTTTGGAGAATCTCATTG  
CGAGCCTGATTTTGGATGAAA

>1958

GCTGCATGTGGATAAAGCCGTCAGTGGCCTTCGCAGCCTCACCACTCTGCTTCGGGCT  
CTGGGAGCCCAGGTGAGTAGGAGCGGACACTTCTGCTTGCCTTTCTGTAAGAAGGG  
GAGAAGGGTCTTGCTAAGGAGTACA

>1959

ATAGATGCCAATGTGCTAGCCAAAAAGACAAGAAGTGCTGGAATTTTTGCCAAGCAGG  
AAAAGAACTCAGGTGAGCAGAAACACCTTTGCTTTTCAATCAGTTTAACAGCCTCCTG  
AACTCCTTCCTATCATGGTACTGC

>1960

AAACATTGAAGTTGTTTTGAACTTGGTGTACCTTTAATTACAACCTAGCAGACGGAA  
CTGAACTCAGGGTAAGAATTTTTTTTTTATGAGCAATGCATTCTTGATTTTCTACCCA  
ATATTAATGATTTCTGCTC

>1961

ATTCAAACGGACAGACAATGGAAACGAACTGAATACTGTCCGAGAAATTATAGGTGAT  
GAACTAGTCCAGGTGAGTTGTCAAATTTATAGCTATTTTCAAAGGCAAAAATTACTAC  
AAAACAATAATTTTGTCACTGC

>1962

CTGCTATATCCTGGATGCCATCCTGTTTCTGTATGGAATTGTCCTCACCTCCTCTACTGT  
CGACTGAAGGTAGCGCTGGCAGGGTGGGGTAAGGGCTGGAAGGGGAAGTGGGAGG  
AGGGCAGCAGCAAGGATTCGAAG

>1963

ATCATGGCAGAATCACCAAGCCTCATCACCATCTGCCTTTTAGGATATCTACTCAGTGCT  
GAATGTACAGGTTTGTTCCTTTTTAAATACATTGAGTATGCTTGCCTTTTAGATATAG  
AAATATCTGATGCTGTCTT

>1964

GAGAGAATGTATGGAAGAAAAGTGTAGTTTTGAAGAAGCACGAGAAGTTTTTGAAAA  
CACTGAAAGAACAGTGAGTATTTCCACATAATACCCTTCAGATGCAGAGCATAGAATAG  
AAAATCTTTAAAAGACACTTCTC

>1965

TGCAAGGATGACATTAATCCTATGAATGTTGGTGTCCCTTTGGATTTGAAGGAAAGAA  
CTGTGAATTAGGTAAGTAACTATTTTTGAATACTCATGGTTCAAAGTTCCCTCTGAAA  
CAAGTTGAAACTGGAAAATGC

>1966

AACAAGGTGGTTTGTCTCTGTACTGAGGGATATCGACTTGCAGAAAACCAGAAGTCCT  
GTGAACCAGCAGGTCATAATCTGAATAAGATTTTTTAAAGAAAATCTGTATCTGAAACT

TCAGCATTTTAACAAACCTACAT

>1967

CCAATCATTTAATGACTTCACTCGGGTTGTTGGTGGAGAAGATGCCAAACCAGGTCAAT  
TCCCTTGGCAGGTACTTTATACTGATGGTGTGTCAAACTGGAGCTCAGCTGGCAAGA  
CACAGGCCAGGTGGGAGACTGAG

>1968

GTTAATGAAAAATGGATTGTAAGTCTGCTGCCACTGTGTTGAACTGGTGTAAAATTAC  
AGTTGTCGCAGGTAAATACACAGAAAGAATAATAATCTGCAGCACCCTAGCTCTTTAA  
TATGATTGGTACACCATATTTT

>1969

GGATAGCCTCTCTTACTACCACTCACCCGCAGACTCCTTCTCCAGCATGGGCTCGCCTG  
TCAACGCGCAGGTAAGGCTGGCTTCCCGTCGCCGCGGGGCCGGGGCTGGGGTTCG  
GGAGGAGGAGACACCGGGCGGGAC

>1970

GGCTGGCGTTGTGAAGACCATGACAGGAGGCCGAGCGCAGAGCATTGGCAGGAGGG  
GCAAGGTGGAACAGGTGAGGAACTCTAGCGTACTTCTCTGGGAATGTGGGGGCTGG  
GTGGGAAGCAGCCCCGGAGATGCAGGA

>1971

GGAAAGGAATAAGATGGCTGCAGCCAAATGCCGCAACCGGAGGAGGGAGCTGACTGA  
TACTCCAAGCGGTAGGTACTCTGTGGGTTGCTCCTTTTTAAACTTAAGGGAAAAGTT  
GGAGATTGAGCATAAGGGCCCTTG

>1972

GAGTCACTCTCCCAGGAGACCCAGACCTAGAACTACCCAGAGCAAGACCACAGCTG  
GTGAACAGTCCAGGTAAGAAACATATTCTGGGGGACTGGGTAGCTTGACATAGACACA  
CTTAATACTGGTGAACACAATAG

>1973

CATTTTTCTGCACTGGCCAGAAAATGGAGTCTTAAACCTTGAATCCCCATAACTACCT  
CAACTACAAAGGTAAAGAGGCTTAGTCAGTCTTAAGATGTAACCTTTCTGTAAAGGAAT  
TGGCAGATCCTTCCTTTCTTCT

>1974

GTCTCCACTGCTGCCCTTGCCGTCCTCCTCTGCACCATGGCTCTCTGCAACCAGGTCCT  
CTCTGCACCACGTGAGTCCATGTTGTTGTTGGGTATCACCCTCTCTGGCCATGGTT  
AGACCACATCAGTCTTTTTTTG

>1975

GACAGATTCCACAGAATTTTCATAGCTGACTACTTTGAGACGAGCAGCCAGTGCTCCAA  
GCCAGTGTCATGTAAGTGCCAGTCTTCTGCTCACCTCTAGGGAGGTAGGGAGTGTC  
AGGGTGGGGGCGAGAAACAGGCCAG

>1976

GCGCTCCCACTCTCGGCCGACACCCCTCATGGCCAACCGTTACACCATGGATCTGACT  
GCCATCTACGAGGTGAGTCCCCGCCGCACGGCATCCCCGGTACCTGCATGCCTGAGTC  
CGAGTCCCCACCTCTCTAGCGCCG

>1977

GACCCATGGACAAGAGCGCAGGCAGTGGCCACAAGAGCGAGGAGAAGCGAGAAAAG  
ATGAAACGGACCTGTGAGTATGGCTTTCTTCCCTCTCCCGCCACCCCTGCCCCACAC  
TGCAAGCTGCAAACGCGGTACTTTT

>1978

TCTTACAAAATTCCTCTACTCCTGGGAAGCCCAAAACCGGCAAAAAAAGCAAACAGC  
AAGCTTTCATCAAGTAAGTTGAGAATCCTGTGCTTGCAAATATCAATAGTTAGCTGCTG  
AACTGAAAAGGGGAAGTCTGATGT

>1979

ACCCCAAAAGCTGTCCTCAAAGCAAGGAAAATATATACTGACTTCATAGAAAAGGAA  
GCTCCAAAAGAGGTAAGGAAACAAGTTCCTAATTTTCAGCACAAATCTGGACATCTTTAG  
CACAAAAGTGAAACAGTAATCAAG

>1980

GTCAGCGCCGGGCGCGTCAACCTCATCGGGGAACACACGGACTACAACCAGGGCCT  
GGTGCTGCCTATGGTGAGGGGCTGCACGGGGAGCCCCTAGCCC GCCCGCCGCTGTCCC  
GGTCGCCGAGGAGGGCGGCCTCGG

>1981

CAGCGCTCGCTGGAGCCTGGGACTCCTCGGTGGGCCAACTATGTCAAGGGAGTGATTC  
AGTACTACCCAGGTATGGGGCCAGGCCTGAGCCAAGTCTCACTGATACTAGGAGTG  
CCACCTCACAGCCACAGAGCCCAT

>1982

GGGGGTGGCCTGTCCAGCTCAGCATCCTTGGAAGTGGCCACGTACACCTTCCTCCAGC  
AGCTCTGTCCAGGTACCAGCTAGGCCCCAGCCCTGACCCAGCCCTCCTTCCTGAGGT  
CTCCAGGTGGTCCCAGCTTCTACT

>1983

CCTGTGGCATCATGGACCAGTTCATCTCACTTATGGGACAGAAAGGCCACGCGCTGCT  
CATTGACTGCAGGTTGGGCTCGCTCCCCTCGTCCCCTCCCGCCCTGCACTCAGCAGCT  
CCTGGGTGGAGTGTGCCACTGCC

>1984

CAATGTGAAGAAGTGGCCCGGGCGCTGGGCAAGGAAAGCCTCCGGGAGGTACAACCTG  
GAAGAGCTAGAGGGTGAGAACTGCCAGGGTGCTCTATCCTGGAGGCGGCTGTGCTCC  
CTGCTGGCGCCTCAGTGTGGCCTTGA

>1985

CGGCCGCCCTGAGACGTGGCGACTACAGAGCCTTTGGCCGCTCATGGTGGAGAGCC  
ACCGCTCACTCAGGTGAGGCCCTCTGGGCGCCCCGCTCCTGCCGGGCACAGGCCGGC  
CCAGGCCACCCCTTCAATATCCTCT

>1986

TGGCTTCGGTGGCTGCACGGTGACTGCTGGAGGCCTCCGCTGCTCCCCACGCCATG  
CGGCACATCCAGGTGGGCGGGCACCAGGGCCTGGGCGGGCAGGAGCGGCAGCTTCCC  
GGGGCCCTGCCACTACCCCCAGCC

>1987

GGAACCGATCCTCAGCAACGCCAGCAGGCGTCAGAGGCGGACGCCGAGCAGCAAC  
CTTCCGGGCAAACGGTAACTGCACCGCGGCAGGACTCGCTGGGGCGCGGAGCCGAG  
CCCTCCCCTTCTTAGGAAGCTTTCGT

>1988

TCTGAAGACAGTGCCCCGCCATGACCCTCTCAACCCTCTGTGTCCTGGGGCCATCCGA  
GCCAACGGAGAGGTAAGCCTGTAGAGCCCTGCATCTGCAGGCTGGGCCACGGGGAGT  
AGTTCCCTCTTAGAACTGTCCTCCA

>1989

CCCCAGTACGATAGCACCTTCTGTTTGACAACGACTTCCCAGCTCTGCAGCCTGATGC  
CCCCAGTCCAGGTAACCTGGCTCCAACCTGCTGCTGGGGAGGAGGGTGGCTAGACCTCT

TGAGGGACTTCTGCTGCAGAGAT

>1990

GATCCGGGCTGTTGTTGATGCATGGGCCTCAGTCACAGAGGAGCTGGGTGCCAGTAC  
CCTTGGGTGCAGGTTTGTGAGGTCGCCCCCTCCCTGGATGGGCAGGGAGGGGGTGTAT  
GAAGCTTTGGTTCTGGGGAGTAAC

>1991

GCAGGCCTATAAGAGTCAGCATGGAGAGCCCCTGCTAATGGAGTACAGCCGCCAGGAG  
CTACTCAGGAAGGTGGGAGAGAGCCAAGCCCTGTGTCCCAAGGAGTCCCTAACTTT  
CTTATCCCATGAGAGAGGTGTGTAA

>1992

TACCAGACACTGCTGCTGCCCCGTCGGCATGTGCGGCGGCTACCTGAGCTGACCCCTG  
CTGAGCGTGATGGTCAGTCTCCCAAGTAGGATCCTGGGGCTAGGCACTGGATGGAGGT  
TGCTCCCAGTAGGGTCAGCATCTG

>1993

ATGAAGAAGCTCTTGACCAAGTATGACAACCTCTTTGAGACGTCCTTCCCTACTCCAT  
GGGCTGGCATGGTGAGGCTTTCAAGTACCTATATTTAGCCCCAACACCATTTCTGGGC  
TCCTGGGCTCAGCCTAGTGAAC

>1994

CACTGTCCGAAATTCATGGTTGGCTACGAAATGCTTGCTCAGGCTCAGAGGGACCTC  
ACCCCTGAGCAGGTCAGGACTCAGAACAGTCTGGCGTCTCCAGACTCTCACATGCAGT  
ATGTGCAGGCACCTGATACTTCTG

>1995

ACAAGGCTACTATCACAAGCCTGTGGGGCAAGGTGAATGTGGAAGATGCTGGAGGAG  
AAACCCTGGGAAGGTAGGCTCTGGTGACCAGGACAAGGGAGGGGAAGGAAGGACCCT  
GTGCCTGGCAAAGTCCAGGTCGCTTC

>1996

ACAAGGCTACTATCACAAGCCTGTGGGGCAAGGTGAATGTGGAAGATGCTGGAGGAG  
AAACCCTGGGAAGGTAGGCTCTGGTGACCAGGACAAGGGAGGGGAAGGAAGGACCCT  
GTGCCTGGCAAAGTCCAGGTCGCTTC

>1997

CAAGGGCACCTTTGCCAGCTGAGTGAAGTCACTGTGACAAGCTGCATGTGGATCCT  
GAGAAGTCAAGGTGAGTCCAGGAGATGTTTCAGCACTGTTGCCTTAGTCTCGAGGC  
AACTTAGACAAGTGAAGTATTGATC

>1998

GGCTGCTTTAACTCTGGTAAAGTGGATATTGTTGCCATCAATGACCCCTTCATTGACCT  
CAACTACATGGTGAGTGCTACATGGTGAGCCCCAAAGCTGGTGTGGGAGGAGCCACCT  
GGCTGATGGGCAGCCCCCTTCAT

>1999

TCCATGGCACCGTCAAGGCTGAGAACGGGAAGCTTGCATCAATGGAAATCCCATCAC  
CATCTTCCAGGAGTGAAGTGAAGACAGAATGGAAGAAATGTGCTTTGGGGAGGCAAC  
TAGGATGGTGTGGCTCCCTGGGTA

>2000

GTGGGGCGATGCTGGCGCTGAGTACGTCGTGGAGTCCACTGGCGTCTTACCACCATG  
GAGAAGGCTGGGGTGAAGTGCAGGAGGGCCCCGCGGGAGGGGAAGCTGACTCAGCCCT  
GCAAAGGCAGGACCCGGGTTTCATAAC

>2001

CTGCTGATGCCCCATGTTTCGTCATGGGTGTGAACCATGAGAAGTATGACAACAGCCTC  
AAGATCATCAGGTGAGGAAGGCAGGGCCCGTGGAGAAGCGGCCAGCCTGGCACCTA  
TGGACACGCTCCCCTGACTTGCGC

>2002

CACCACCAACTGCTTAGCACCCCTGGCCAAGGTCATCCATGACAACCTTTGGTATCGTG  
GAAGGACTCATGGTATGAGAGCTGGGGAATGGGACTGAGGCTCCACCTTTCTCATCC  
AAGACTGGCTCCTCCCTGCTGGGG

>2003

CCCACTCCTCCACCTTTGACGCTGGGGCTGGCATTGCCCTCAACGACCACTTTGTCAA  
GCTCATTTCTGGTATGTGGCTGGGGCCAGAGACTGGCTCTTAAAAGTGCAGGGTCT  
GGCGCCCTCTGGTGGCTGGCTCAG

>2004

CTCCTCAACAGCAGCAGTGTGGGCAACCTCAGCTGCGAGCCCCCTCGCATTGCGGGA  
GCCGGGACACGAGGTGGGTGCCTCCCTCAGCCCCCCCCACAAGCTATTTCTCACTGTA  
CCCCAGAACACTAATAGAGTCCCCC

>2005

CTCCTGCCAATCTCATGGGCACATTCATCTTTGGCACCGTCATCTGCAAGGCGGTTTC  
CTACCTCATGGGTGGGTGAGACAACCCACCCCACTTGGCACTCTCCCCGCCTAA  
AGCTCTTGATGTAGGGGTCT

>2006

TGCAACCAGTGGGGCCTCGTGTGCTGCAGTGCCTGCATCGCTGGCCAGTGCAGGGGT  
CCGCCAGACCTGGTGAGCTTGCCATAAATCCTAGGAATTCCTTTCTACCCCTATT  
AGATGCTTACGACCATTGCCCA

>2007

GGGCTTCGCTTTGACGGCGACAGTGACAGCGACAGCCAAAGCAGGGTCCGAAACCAA  
GGCGGGCTGCCAGGTGGGGCTGGACCACGTGAGCAAAATCTGGGCGAGGCGGACGTT  
TGGAGGGCGACGGGGCCTGCTGGAGT

>2008

GAGCAGCAGGGCCCAGCCTCTCATCATCGAAGGCAGCTGGGACCCAGGGTCCCCCA  
CACCTCGTGGCAGGTAGGAGCTGCTGACTGCCCTGCTTGCCTCACTTGGCCATGTTTG  
GCCAAGGTCTCCCAGACTGGCTCT

>2009

CCTCAAGAACCTGAGCCCGTCGGCCAGCCAGTACGTGGAACAGATGTTTGAGACTTTT  
GACTTCAACAAGGTGAGCAGGGGCCAGTGGCAGGGAGGGGAAGTGCTGGAGGGAC  
CCCTCTGGAAGCCTGACCAGCTGGGG

>2010

GTACTTCAAGCTCTATGATGTAGATGGCAACGGCTGCATTGACCGGATGAGCTGCTCA  
CCATCATCCAGGTGCAGAGGGCCCGGCACTGGGGGGCAGCGGTCTGGGGTGGGACCC  
GGAAGTGAAGGCCAGGGTTAGAA

>2011

AGCGATACCACCATGACTGCAGAGGAGTTCACCGATACAGTGTCTCCAAGATTGACG  
TCAACGGGGATGGTGAAGGGGGCCGAGGAGGGGCTCCCCAGCGGAGGGGTACCATG  
GATGTGGGGTACCAGGGGTGGAAGG

>2012

TGGAACCCCTGTGGTCTTCTTCTCATCTAATGACCCTGAGGGGATGGAGTTTTCAAGTC  
CTTCCAGAGAGGTAAGAGAGAGAGCTCCAATCAGCATTGTCACAGTGCTTCTGGAAT



CCTGGCACTGGAATTTAATGAAT

>2013

AGTAGGGTAAGCATCATGGCTGGCAGCCTCACAGGATTGCTTCTACTTCAGGCAGTGT  
CGTGGGCATCAGGTGAGTGAGTCAAGGCAGTGGGGAGGTAGCACAGAGCCTCCCTTC  
TGCCTCATAGTCCTTTGGTAGCCTT

>2014

GAGAGTACACGCAGTGGGCGACGGATGGAGCTGAGTATGGGGCCATCCAGGCTAATC  
ACACGGGCACAGGTAACCATTACACCCCTCACCCCTGGGCCAGGCTGGGTCCTCCTA  
GAGGTAAATGGTGTCAAGTATCAC

>2015

GCTCTCAACATCCTTGCCCTGTCACCCCTGCCAAAATTTGCTACTTAAATCGTACTTC  
TCTGAAGAAGGTGAGGAGGAAGGGGACAAGATGACATAGAGCCATTGAACTTTTCG  
TTTTCTTTCTTTTTTTAAAAT

>2016

ATGGGAAGGGTCACTCAAGGGACAGCCCGGAGACATCTACCACCAGACCTGGGCCA  
GATACTTTGTGAAGTAAGGGATCAGCAAGGATGTGGGATCAGGACTGGCCTCCCATTT  
AGCCATGCTGATCTGTGTCCAACC

>2017

TACTACCACAATGTCCGCTACTCATGCTGGATGACCAACGCTTGCTGCTGCCCCACT  
GGGCAAAGGTGGTAAGGCCTGGACCTCCATGGTGTCCAGTGACCTTCAAATCCAGCA  
TCAAATGACTGGCTCCCAAAT

>2018

GTTCTGGGAGCAGAGTGTGCGGCTAGGCTCCTGGGATCGAGGGATGCAGTACAGCCA  
CAGCATCATCAGGTAAGCCACCCAGTCTCCCTTCTGCAAAGCAGACCTCAGACCT  
CTTACTAGTTTCACCAAAGACTGAC

>2019

CCATCATTGTAGACATCACCAAGGACACGTTTTACAAACAGCCCATGTTCTACCACCTT  
GGCCACTCAGGTGAGTGGAGGGCGGGCACCCCATCCATACCAGGCCTATCATCTC  
CTACATCGGATGGCTTACATCAC

>2020

AGAAGAACGACCTGGACGCAGTGGCACTGATGCATCCCGATGGCTCTGCTGTTGTGGT  
CGTGCTAAACCGGTGAGGGCAATGGTGTGAGTCTGGGAAGTGGGCTGAAGACAGCGTT  
GGGGGCCTTGGCAGGATCACACTCT

>2021

TGGAACCCCTGTGCTCTTCTCCTCATCTAGTGACCCTGAGGTGATGGAGTTTTCAAGTC  
CTTCCAGAGAGGTAAGAGAGAGAGCTCCCAATCAGCATTGTCACAGTGCTTCTGGAAT  
CCTGGCACTGGAATTTAATGAAT

>2022

CAAGAGCAGAAGCAGTGGGCATTGGATGGAGCTGAGTACAGGACCATACAGGCTAATT  
GCACCGGCACAGGTAACCATTACACCCCTCACCCCGGGCCAGGCTGGGTCCTCCTA  
GAGGTAAACGGTGTCAAGTATCAC

>2023

CTATGCAGACACCCCTGATGATTTCCAGTTGCACAACCTCAGCCTCCAGAGGAAGAT  
ACCAAGCTCAAGGTAGGCATTCTAGCTTTTTCAGGCCCTGAGGGCCCTGATGTCTGGG  
GGTTGAGAACTGTAGGGTAGGTC

>2024

ATGGGAAGGGGCCACTCAAGGGACAGCCCAGAGACATCTACCACCAGACCTGGGCCA  
GATACATTGTGAAGTAAGGGATCAACAAGGATGTGGGATCAGGACTGGCCTCCCCTTT  
GGCCATGCTGATCTGTGTCCCAACC

>2025

TACTACCACAATGTCCGCTACTCATGCTGGATGACCAACGCTTGCTGCTGCCCCACT  
GGGCAAAGGTGGTAAGGCCTGGACCTCCATGGTGCTCCAGTGACCTTCAAATCCAGCA  
TCCAAATGATTGGCTCCCAAAC

>2026

GTTCTGGGAGCAGAGTGTGCGGCTAGGCTCCTGGGATCGAGGGATGCAGTACAGCCA  
CAGCATCATCAGTAAGCCACCCAGTCTCCCTTCTGCAAAGGAGACCTCAGACCC  
ATTAGTAGTCTACCAAAGACTGAT

>2027

CCATCATTGTAGACATCACCAAGCACAGTTTTTACAAACAGCCCATGTTCTACCACCTT  
GGCCACTCAGGTGAGTGGAGGGCGGGCACCCCATCCATACCAGGCCTATCATCTC  
CTACATCGGATGGCTTACATCAC

>2028

AGAAGAACGACCCGGACGCAGTGGCACTGATGCATCCCGATGGCTCTCCTGTTGTGGT  
CGTCTAAACCGGTGAGGGCAATGGTGAGGTCTGGGAAGTGGGCTGAAGACAGCGTT  
GGGGCCTTGGCAGGATCACACTCT

>2029

AGCCTTCTGAGAAAATGCAGCCATTCCTCCTCTGTTGGCCTTCTTCTGACCCCTGG  
GGCTGGGACAGGTAAGTGACTATCCCTATTCCAGAGGCCTGAACCCATCTTATAAGATA  
CCCTGTACCCATGAGCACTGGT

>2030

GATCCCAAGGCCAACTCCCCGAACCACTCAGGGTCCTGTGGACAGCTCACCTAGCTG  
CAATGGCTACAGGTAAGCGCCCCTAAAATCCCTTTGGCACAATGTGTCCTGAGGGGAG  
AGGCAGCGACCTGTAGATGGGACG

>2031

GCTTTTTGACAACGCTATGCTCCGCGCCCATCGTCTGCACCAGCTGGCCTTTGACACCT  
ACCAGGAGTTTGTAAAGCTTTGGGGAATGGGTGCGCATCAGGGGTGGCAGGAAGGGG  
TGACTTTCCCCGCTGGAAATAAG

>2032

CCAGACCTCCCTCTGTTTCTCAGAGTCTATTCCGACACCCTCCAACAGGGAGGAAACA  
CAACAGAAATCCGTGAGTGGATGCCTTCTCCCCAGGCGGGGATGGGGGAGACCTGTA  
GTCAGAGCCCCCGGGCAGCACAGCC

>2033

CGGCGCCTCTGACAGCAACGTCTATGACCTCCTAAAGGACCTAGAGGAAGGCATCCAA  
ACGCTGATGGGGGTGAGGGTGGCGCCAGGGTCCCCAATCCTGGAGCCCCACTGACT  
TTGAGAGACTGTGTTAGAGAAACAC

>2034

GGATCCCAAGGCCAACTCCCCGAACCACTCAGGGTCCTGTGGACAGCTCACTAGCG  
GCAATGGCTGCAGGTAAGCGCCCCTAAAATCCCTTTGGCACAATGTGTCCTGAGGGGA  
GAGGCGGCGTCTGTAGATGGGACG

>2035

GCTTTTTGACAACGCTATGCTCCGCGCCCGTGCCTGTACCAGCTGGCATATGACACCT  
ATCAGGAGTTTGTAAAGCTTTGGGTAATGGGTGCGCTTCAGAGGTGGCAGGAAGGGGT

GAATTTCCCCGCTGGGAAGTAA

>2036

CCAGACCTCCCTCTGCTTCTCAGAGTCTATTCCAACACCTTCCAACAGGGTGAAAACG  
CAGCAGAAATCTGTGAGTGATGCTTCTCCCCAGGTGGGATGGGGTAGACCTGTGGT  
CAGAGCCCCCGGCAGCACAGCCA

>2037

TGGCGCCTCGGACAGCAACGTCTATCGCCACCTGAAGGACCTAGAGGAAGGCATCCA  
AACGCTGATGTGGGTGAGGGTGGCACCAGGATCCAATCTGGGGCCCCACTGGCTTCC  
AGGGACTGGGGAGAGAAACTGCT

>2038

GCTGCAGCGGCGCCTCGGACCCCGGGCCTGGTGGTCTCGGCTTCCCGTGCAACCA  
GTTTGGGCATCAGGTGCGCCGGGCGGAGCGGGCGGGGCGGGGCGGACGTGCAGTA  
GTGGCTGGGGGCGCCGGCGGTGTGCT

>2039

TTCGCGCCCTGCGCGTCCAGCTCTTCTAAGACGAGATGCCGTGGGCTTCCAACAG  
ATAGGCTCCGAAGTAGGATTCATCATGAGGGGCGGGGCGGGGGGCACGGGTCCCG  
CTTTTCTTGGGCTGGGGTCGCGTT

>2040

TGTGTTCTCTGCGGTGCTTGGCTCCCTGCAGTTTGGGTACAACATTGGGGTCATCAATG  
CCCCTCAGAAGGTGAGGGCCTGCAGCTGGCAGGGTGGGGGTACCCAAACGAGGAGG  
ACAGGTGTCTCGGGGGTGGTGGAAA

>2041

TGGCCATCTTTTCCGTGGGCGGCATGATTTCTCCTCCTCATTGGTATCATCTCTCAGT  
GGCTTGGAAAGGTTGCGAGCTGGAGGGCAGGGGTGGGGGAAACAGGAAGGGAGCCAC  
TGCTGGGTGCCCTCACCTCACAG

>2042

GGCCTGGCCAACGCTGCTGCCTCCTATGAAATGCTCATCCTTGGACGATTCCTCATTGG  
CGCCTACTCAGGTACTCACGGGACACAGCCCTGCCTAGCGCCTGTTCTTTTACC  
ATGCCTGGGCTTTCAGATGGGA

>2043

CACTCACCTGCGGGGCGCCTGGGGACGCTCAACCAACTGGCCATTGTTATCGGCATT  
CTGATCGCCAGGTGACCGGAGCAAGCCTCATGGGTGCTGGGCAGTGGTTAGAGTG  
GGGCTCTGGAGAATATGGTGGGCTT

>2044

CTGCCCTTCTGTCCCAGAGCCCCGCTACCTCTACATCATCCAGAATCTCGAGGGGCC  
TGCCAGAAAGAGTAAGCTCTCCCGCTGCAGCCTGGCCCAGGCCATGCCTCCGCCTCA  
TCTTGCTAGCACCTGGCTTCCTC

>2045

TACCCACCGGCAGCCCCTGATCATTGCGGTCTGTGCTGCAGCTGAGCCAGCAGCTCTCT  
GGCATCAATGCTGTATGTGTGGAGCAGCCTCCAGGCAGGGCACAGCCCCGGGAGGGT  
AGACGAGAGTGGGGAGCAAACCCCC

>2046

AGGGGTAGGCCAGCCTGCCTATGCCACCATAGGAGCTGGTGTGGTCAACACAGTCTTC  
ACCTTGGTCTCGGTAAGTCTCACCTCTGGAATGGCCCCAGCCACTGGCTTACCTCC  
CTGGGTGTCCCGGAGGTCTGCTC

>2047

GCTCCATCTCCTGGGCCTGGCGGGCATGTGTGGCTGTGCCATCCTGATGACTGTGGCTC  
TGCTCCTGCTGGTAAGGCCTGGAGGCTAGGAGGGGCTAGCAGCCCACCCATGGGAAT  
GGTCCTGTGAGTCTCTGTGACCA

>2048

CATGGCTGTGGCTGGTTTCTCCAAGTGGACGAGCAACTTCATCATTGGCATGGGTTTCC  
AGTATGTTGCGGTAGGTCCCCCGCCCCAGCCTCCACACCGTAGGCCAGAGGTGGGC  
ATCACACAGCTAGCCACCTGCT

>2049

GCCCAGCCACCCCGGCCCTGAGCCAGCCGGGCCCCAGCATCCCTACTCCCACCAGC  
GCCAGAACACAGGTAAGGGCCAGGCAGCTAGGAGCAGGTGGGCAACAAGGGTGGTG  
TCAAGGCCTGAAGCCTGGGGCTGGGA

>2050

GTTCCCTCGTGTGAAGAACTGGGAGGTGGGGAGCATCACCTATGACACCCTCAGCGCC  
CAGGCGCAGCAGGTAAGGCCGGCATGCCCTGTCCCATCGTCTCCAGGAAAGGGTG  
GGTAAGGCCTGGCCTCAGATGGGGC

>2051

CCCCGGCCCCTGAGCAGCTGCTGAGTCAGGCCCGGGACTTCATCAACCAGTACTACAG  
CTCCATTAAGAGGTGACAGCTTCCCGGACGCCACAGCCTCCCTTGTCCCACTGAGGCC  
CCAGAAACCCCGTGACGACCTTCC

>2052

GTTGCGGGGCTAAGCAGGCCTGGCGCAACGCTCCCCGCTGCGTGGGCCGGATCCAGTG  
GGGGAAGCTGCAGGTGCGGCTGGCCAGCGACTGAGAGACCCGGGCGCTACAAAAG  
GGGAGCGGGGTGGCGGGGCAGTTCCTA

>2053

GGTCTGCACAGGAAATGTTACCTACATCTGCAACCACATCAAGTATGCCACCAACCG  
GGGCAACCTTCGGTGAGTGCCCCCACCATGCCAGGCCCCAGCCTTCTCCCAAGGC  
AGGGAAGGCGGGGCTCTGACCAGC

>2054

GCGCTACGCGGGCTACCGGCAGCAGGACGGCTCTGTGCGGGGGGACCCAGCCAACGT  
GGAGATCACCGAGGTGGGCACCGAGGGCCACCCATGAGGGTGTCCCAAGGTGGAGA  
ATGAGGAAACCAGTGGGAGAAGGCTC

>2055

CAGATGAGCCCCAGAAGTCTTCTTCTGCCCCCGAGCTGGTCCTTGAGGTGCCCCCT  
GGAGCACCCACGTGAGCACAAAGGGATTGACTGGGTGGGATGGAGGGGGCCATCC  
CTGAGCCTCTCAAGAAGGGCCTGCA

>2056

TGGCTGGTACATGAGCACTGAGATCGGCACGAGGAACCTGTGTGACCCTCACCGCTAC  
AACATCCTGGAGGTGAGGTGCGGGATGGGGCTCGGGCACCGAATGCACCTGTCCAAG  
GCAGGAGTCTGGCTCTCACTCCATC

>2057

GACCACCTCGTCCCTGTGGAAAGACAAGGCAGCAGTGAAATCAACGTGGCCGTGCT  
GCACAGTTACCAGGTGAGAGGCCAGACTGGCCAGGAAGGCAAAGGGTTGCATAC  
GGGGGCAGCAGGGGCGGGGGATGGAG

>2058

GGGCAGCCTCACTCCTGTTTTCCATCAGGAGATGGTCAACTATTTCTGTCCCCGGCCT  
TCCGCTACCAGGTGCCACCCTAATGGCTCTGCCAGCCTGGGCCAGCTCTAATTCTAA

GCAGCCCCTGGGGACCTCTAAC

>2059

ACCCCTGGAAGGGGAGTGCCGCCAAGGGCACCGGCATCACCAGGAAGAAGACCTTTA  
AAGAAGTGGCCAAGTGGGTCCCCTGGGAGCCCCGCTCTCCCACACACACCCTGGGGG  
CCCCACTCTCCCCACACACCCTGGG

>2060

CGAGACCGGCCGGGCCAGAGCTACGCACAGCAGCTGGGGAGACTCTCCGGAAGGC  
TTTTGATCCCCGGGTAGGGCTGAGCCCAGGGGAGCAGGGAGCTAGAAAGAGGGGGCT  
CTATCAGCATCTTCAGGGGTGCCCTG

>2061

CGAACACGAGACGCTGGTGTGGTGGTAACCAGCACATTTGGGAATGGGGATCCCCCG  
GAGAATGGAGAGGTGAGAACTTCAGGAAAGGGGCTGCTGGGAATGAGGAGAGACT  
CAGAATTGGAGTACTGGGCAGGAAC

>2062

TGTCCTTTGGCGGCGGAAGAGGAAGGAGTCCAGTAACACAGACAGTGCAGGGGCC  
TGGGCACCCTCAGGTCAGGGCCTCACCAAGAGGGGTGCAACGGGTGGGCAAGCTGCC  
TGGGCAAACGTGGCCTGCAAAGGGAG

>2063

GCTGGGCCAGGGCGACGAGCTGTGCGGCCAGGAGGAGGCCTCCGAGGCTGGGGCC  
AGGCTGCCTTCAGGTGAGCCCAGCCCAGCCCCTGCTCTGACTCCTGCCCCCTGGGAT  
GCCTCCTCCTGCCTACTCTGCCCTG

>2064

CCCAAACGGAGCTGGAAGCGCCAGAGGTACCGGCTGAGCGCCAGGCCGAGGGCCT  
GCAGTTGCTGCCAGGTGGGCCCTGCCTCACCTAACCCGGCTGGTTCTCTGAGGCCCC  
CACACCCGGGACTAAAGCACTCTGG

>2065

ACGTGCACAGGCGGAAGATGTTCCAGGCTACAATCCGCTCAGTGGAAAACCTGCAAA  
GCAGCAAGTCCACGTGAGGACGACGGCTTACCGCCCCCAACCCCTGTCCTGAACA  
CCCTGACCCTGGACCCTCCTCCTCCC

>2066

AGCCGCGTGGAGGACCCGCCGGCGCCACTGAGCCCGTGGCAGTAGAGCAGCTGGAG  
AAGGGCAGCCCTGGTGAGGGGACCCCTGGGAAGCAACAGGGCACACCAGCCCCATG  
CCCAGCCCCACCCCGGCCCCAGGCCT

>2067

GCTCTGCGGCTGCTCAGCACCTTGGCAGAAGAGCCCAGGGAACAGCAGGAGCTGGA  
GGCCCTCAGCCAGGTTGGGGGCCACCCCAATGAGGCACAGGGGCTAGAGAGACGGGA  
TGAGCTGGGGGGACCCAGTGGCAGG

>2068

AGCTCGGCACCCAGCACCCACCCAGGAGAGATCCACCTCACTGTAGCTGTGCTGGCAT  
ACAGGACTCAGGGTGAGGCAACAAGCAGGAGCAGGCCTGGCCACAGCAGGGTTGGG  
ACCGGCCCTCTCTGGCCCTCACCG

>2069

ACTATGGAGTCTGCTCCACGTGGCTAAGCCAGCTCAAGCCCGGAGACCCTGTGCCCTG  
CTTCATCCGGGGGTAAGTGAGATGGAGGACTTGGTGGGGAGCTGCCAGGGTCAGGG  
TGGCAGCTTTGGTGAGGAGTGTAC

>2070

GGTCCAGGCACTGGCATTGCCCCCTCCGGGGATTCTGGCAGGAGCGGCTGCATGACA  
TTGAGAGCAAAGGTGAGGCTGGTACTAAAGGACTGCCTGAAGGGAGTCACACAATC  
TAGGGACAGAGGGGTGGGGCTGGAA

>2071

GAACGCCAGCAGCGCGGGGTGTTTGGCCGAGTCCTCACCGCCTTCTCCCGGAACC  
TGACAACCCCAAGGTGTGAGACCCTGAGGGCGCAATGGTAACCTGAAGATAGGGAGA  
GAGGGGAGGACTCGCGCTCTCCAGCG

>2072

AGAGTTGCCACCCAGGCCTCAGCCAGGACCTTTCAGGCCAGACAGGAGCACCTGACC  
AAAGGCTTCACAGGTAAGTGGCCCTCCGTATTACCCAGCATGGCCTCCACAGGGAGA  
GAGGAGGTCAGTTCCTGTCCCTTTA

>2073

TGGGCACACTCCACCTTCCCTAGTACCAGCTGGTTTCCAGAGGAGAAGGCTGAGAC  
CCGAGAAGGGAGGTGAGTGCACCCCGTCCCATGTGAGGCTCCGCTACATCCCCAGTGC  
TTGCCGTCCCTGAGGATCGGTCCA

>2074

CCGAGGAGGAGGACAAGAAGGAGGACGTGGGCACGGTGGTCGGCATCGACTTGGGG  
ACCACCTACTCCTGGTAAGTGGGGTTGCGGATGAGGGGGACGGGGCGTGGCGCTGGC  
TGCGGTGAGAAGTGCGGTGCTGATGTC

>2075

CAAGCGGCTCATCGGCCGCACGTGGAATGACCCGTCTGTGCAGCAGGACATCAAGTTC  
TTGCCGTTCAAGGTTGACCGGTTTTCTCATCCAGTTAGAGAACGGGTGGGTGGTGG  
GAGTATTTAGAGTTATAAGTCTCT

>2076

TCCTGAAGAAATTTCTGCCATGGTTCTCACTAAAATGAAAGAAACCGCTGAGGCTTATT  
TGGGAAAGAAGGTAAATATTTCTAGAACAATGTTAAGTATTTTTTGATCATTAGTATTCT  
CGGTTGGCTGTTATGTATAGA

>2077

CCCAACGCCAAGCAACCAAGACGCTGGAACCTATTGCTGGCCTAAATGTTATGAGGAT  
CATCAACGAGCCGTAAGTATGAAATTCAGGGATACGGCATATTTGCCAAATAGTGAAAA  
TGTGAAGTACTGACAAAACCTTTT

>2078

TGAGTCCTTCTATGAAGGAGAAGACTTTTCTGAGACCCTGACTCGGGCCAAATTTGAA  
GAGCTCAACATGGTATGTTCTTGTGTTTCTGCTTTGCTAATGAGATCTCCTTAGACTCTG  
AATTCAGGACATTGCATCTAGA

>2079

AACCCAGATGAAGCTGTAGCGTATGGTGCTGTGCTGCCAGGCTGGTGTGCTCTCTGGTG  
ATCAAGATACAGGTAGGTCATCATCGCAGCATCTTCTTAGTGATTAGTAGCTTGATGG  
AAGAGCTCGGTACCCCTATTGC

>2080

ACCAAGAACTCTCAGATCTTTTCTACAGCTTCTGATAATCAACCAACTGTTACAATCAA  
GGTCTATGAAGGTAATTACCTTAAGTTTGGTTAATATCATGGCTTTTTTTTTGAGATGAA  
GTCTTGCTCTGTTGCCAGGC

>2081

AGGCCTGTCTGCAGAATCGACACCAACCAGCATCATGTCCATGACACTGGGGTACTGG  
GACATCCGCGGGGTGAGTGAGGGTCCGCTGCACTGTGGGACCGGGCGCGTGGGCGGG

AAGTGCCGAGCGGCTGGGGACCGGC

>2082

CACGCCATGCGCCTGCTCCTGGAATACACAGACTCAAGCTACGAGGAAAAGAAGTATA  
CGATGGGGGACGGTAATGACACCCTTGTGTCCGGGCTCTGCCACTCACGCTGAGTTG  
GCACCAAGCAACCCATGGTGGCCA

>2083

ATTGATGGGGCTCACAAAGATCACCCAGAGCAACGCCATCCTGTGCTACATTGCCCGCA  
AGCACAACCTGTGTGAGTGTGGTTGGCTGCAGTGTGTGGGGGAAGGTGGCATCCTC  
CTTGGCTGGATTGGGGTGCTATGCT

>2084

GGACATTTTGGAGAACCAGGCTATGGACGTCTCCAATCAGCTGGCCAGAGTCTGCTAC  
AGCCCTGACTTTGTGAGTCCCTCCCTGGTCTGGACCAGAAGCCAGGCTTGATTCCCAT  
CTACTCTGGTCCTATTCACAATT

>2085

GGAACCTCTACAATGATGCAGCACTTCTCACAGTTCCTGGGGAAGAGGCCATGGTTT  
GTTGGAGACAAGGTAATGGGGGCATGTGATGAGGACACTAGAGATTTGCCATACATCC  
TATGTTACAGAGATTCCAGCCCAC

>2086

CCACCGTATATTTGAGCCCAACTGCTTGGACGCCTTCCCAAATCTGAAGGACTTCATCT  
CCCGCTTTGAGGTGATGCCCCATCCTCCTTTCTTTGATGCCCTTGTTCGTTACCT  
CCTTTCAGATGCTTCCAGT

>2087

GGGCCAGAGCTGGAAGGAGGAGGTGGTGACCGTGGAGACGTGGCAGGAGGGCTCAC  
TCAAAGCCTCTGCGTAAGTGACCATGCCCGGGCAAGGGGAGGGGGTGCTGGGCCTT  
AGGGGGCTGTGACTAGGATCGGGGGAC

>2088

AAGTTCAGGACGGAGACCTCACCTGTACCAGTCCAATACCATCCTGCGTCACCTGG  
GCCGCACCCTTGGTGAGTCTTGAACCTCCAAGTCCAGGGCAGGCATGGGCAAGCCTCT  
GCCCCGGAGCCCTTTTGTAA

>2089

GGTGGACATGGTGAATGACGGCGTGGAGGACCTCCGCTGCAAATACATCTCCCTCATC  
TACACCAACTATGTGAGCATCTGCACCAGGGTTGGGCACTGGGGGCTGAACAAAGAA  
AGGGGCTTCTTGTGCCCTCACCCC

>2090

GCAACTGAAGCCTTTTGGAGACCCTGCTGTCCAGAACCAGGGAGGCAAGACCTTCATT  
GTGGGAGACCAGGTGAGCATCTGGCCCCATGCTGTTCTTCTCGCCACCCTCTGCTTC  
CAGATGGACACAGGTGTGAGCCA

>2091

GGATCTCACCGTGGGTCCGATTAGCCTTTTCTCTGCCTTGCTTGCTTGAGCTTCAGCGG  
AATTTCGAAATGGTAACTTCGAGAGACGCTCGATGACTCCGCGGGTTTTTGCCGGCG  
AGAGAAAACCCGTTACACAGAG

>2092

TAAGGCTGAAAGGACTCCGAAAGGCCAAGACAAAGGCGGTTTCCCGCTCGCAGAG  
AGCCGGCTTGACAGTCAAGTGTGCTGAGTCTGGGAGTCATGATGTTTTTCTTTG  
CATTCCTTTTTTGTATTTCATCG

>2093

CAGTCATGGACGTGTGGGCGCGACTGCCGCTGTGTACAGCGCAGCCATCCTGGAGTAC  
CTCACCGCAGAGGTAAATGGGTGAACGCCTATAATCCGGAGAAGGTTTGGGGGGCGG  
GGAGGCGGCAAGAGGGAAGGAGGAA

>2094

CACTTGCAACTTGCTATTCTGTTGAGATGAAGAATTGGATTCTCTCATCAAGGCTACAAT  
TGCTGGTGGTGGTATGTTAACTTCTAACATTTTAAAAAATTTCTTCAGAGGAAGGAATT  
TTTTGCTGCTTTTAATTAGTTT

>2095

AACGGCAAGCTTGAGTCAGGACCCTTAATTAAGATCCTCAATTGGCTGGAGGGCAGAT  
CTCGCGAGTAGGGTACAAGGCACTATGAAATGATCTAGTTTCGTGGGTGAGGGGCTGA  
AGGGCCTATGATGCACGGAGGCGG

>2096

TTCGTAACGGGAATGCCGAAGCGTGGGAAAAAGGGAGCGGTGGCGGAAGACGGGGA  
TGAGCTCAGGACAGGTAAGGGAATGAAATCAGCCCTTCTCCTAGAAGCTGCGGCGG  
GGGTGTTTGCATTCCCTTGATGTACG

>2097

TGCCCACTCAAGATCTGCTCTTGAATGTGGATGGGCTTCGAGCCTGGATTAAGAAG  
AAAGGATTAGATGTGAGTGAATTTGAGGGAAAGAGACATTTTTTAGTATTGAATGGTC  
TTAGGTTTAGTCACCCCTTTTC

>2098

GACAAGGAAGGGTACAGTGGCGTGGGCTGCTTCCCGCCAGTGCCCACTCAAAGTT  
TCTTACGGCATAGGTGAGACCCTATTGATGCCTAATGCCTGAACTCTTCAAACCAATT  
GCTAATTCTCTATCTCTGCCCCAC

>2099

GCCCAACGCGCTGTCCGCCCTGAGCGACCTGCACGCGCACAAGCTTCGGGTGGACCC  
GGTCAACTTCAAGGTGAGCGGCGGGCCGGGAGCGATCTGGGTGAGGGGCGAGATGG  
CGCCTTCCTCTCAGGGCAGAGGATCA

>2100

AGAAGTCTGCCGTTACTGCCCTGTGGGGCAAGGTGAACGTGGATGAAGTTGGTGGTG  
AGGCCCTGGGCAGGTTGGTATCAAGGTTACAAGACAGGTTTAAGGAGACCAATAGAA  
ACTGGGCATGTGGAGACAGAGAAGAC

>2101

CAAGGGCACCTTTGCCCACTGAGTGAGCTGCACTGTGACAAGCTGCACGTGGATCCT  
GAGAACTTCAGGGTGAATCTATGGGACCCTTGATGTTTCTTTCCCTTCTTTTCTATGG  
TTAAGTTCATGTCATAGGAAGG

>2102

CAAGGGCACCTTTGCCAGCTGAGTGAAGTGCCTGTGACAAGCTGCATGTGGATCCT  
GAGAACTTCAAGGTGAGTCCAGGAGATGTTTCAGCCCTGTTGCCTTAGTCTCGAGGC  
AACTTAGACAAGTGAATGATC

>2103

ACAAGGCTACTATCACAAGCCTGTGGGGCAAGGTGAATGTGGAAGATGCTGGAGGAG  
AAACCCTGGGAAGGTAGGCTCTGGTGACCAGGACAAGGGAGGGAAGGAAGGACCCT  
GTGCCTGGCAAAAGTCCAGGTTGCTTC

>2104

CGCTGGTGC GCGCCCTGTGGAAGAAGCTGGGCAGCAACGTCGGCGTCTACACGACAG  
AGGCCCTGGAAGGTGCGGCAGGCTGGGCGCCCCCGCCCCAGGGGCCCTCCCTCCC



CAAGCCCCCGGACGCGCCTCACCCA

>2105

ACCCACGCGCTGTCCGCGCTGAGCCACCTGCACGCGTGCCAGCTGCGAGTGGACCC  
GGCCAGCTTCCAGGTGAGCGGCTGCCGTGCTGGGCCCTGTCCCCGGGAGGGCCCCG  
GCGGGGTGGGTGCGGGGGCGTGCGG

>2106

TGAAGCTGCAAGTATTTCTCATTGTGCTCTCTGTTGCATTGAACCATCTGAAAGCTACA  
CCCATTGAAAGTTGGTAACGTTTAAAATCCTGTTTCTTTGTAACTTTGTAAAGTGTG  
AGAAAATTAGCATTAAATACTG

>2107

GAAGAAGGCGGGTGGCGGGGTGGCAAGAGGAAGGAGAAGCTGGAGAACATGAAG  
AAGGAGATGGAGATTGTGAGCTCTGACTGGGGAGGGGCGGGAGCTGGAGGGTAGGCT  
GGGAACCAGGCAGTGGGCGGGGAGGGGG

>2108

TGCCGCCCATCTGCCTCATGCCTTTGCCATCCAGGCTAGTGAGGGGGACCTCACC  
ACCGACGACAATGTGAGCCATGTTGTGGGGACAGGCTCAGGACATGGGGACCTGGGG  
ATGGAAGACACTGAGCCTGGGACTT

>2109

CTGCTTTGGCTACTACCAGGAATTCAAGAGCACCAACATCATCGCCAGCTTTAAGAAC  
CTTGTGCCACAGGTGGGTTCCCCAGCACCCAGCCACTCCAGATCCCAGAGACTCCAAA  
CTGCTCCTGTAGCCTCCTTCCATC

>2110

CCCGAGTGACGCACGAGAGCCCTCTGGAGACCCGCAACATCGCCTTCTTCTCCACCA  
TGTGCCTTGAGGGTCTGTGAAGCCCCCGCCTGCCTGCCAGTAACTGCTGCCTCCACT  
GGCCTCTCTCTGCTATCTTCTAG

>2111

GCGGGCCATGGTCTTCTTTCATGGCCATCGTGGTGGCCTATGTGCCTGAGGGGCTGCTGG  
CCACTGTACAGTGAGTGGGGGAGGGAGGGCACAGGCGCCAGGGCAGGATCTGGTGG  
ACCATCTGTTCTTCTCCACATT

>2112

CGCATGACTGTGTCCCATCTGTGGTTTGACAACCACATCCACACAGCTGACACCACGG  
AAGACCAGTCAGGTGTGGGGGAGGGAGGGCACAGGCGCCAGGGCAGGATCTGGTGG  
ATGGTGGAGACCTGAAGAGGGATAGG

>2113

GTGCCGGGTGCTACCCTGTGCAACCGCGCCGCCTTCAAGTCCGGCCAGGATGCAGTG  
CCTGTGCCCAAGGTGAGAGCCAGGGGGCCTCCAGGGAATCCCGGGAGGCTGGTGTAG  
CCGGCTTCGCCCCTGACACCGGTCC

>2114

CGCCATGGGCTACCGGGACCGCTTCCAAAAGTCTGCGAGATACCTTCAACTCCACC  
AACAAGTTCAGGTGCGCAGCCGGCCCCGCCACGGCCTGGGCCCGCCACCTCGGG  
CCCCGCCCCAGGCCACACCCACATC

>2115

GACGAGCAGTGGCGGAGGCCTTCCAGACCGCCTACCTCAGCCTGGGAGGCCTGGGC  
GAACGCGTGCTCGGTGAGACCCCTGGGCAGGGGAGGAGACTCCAGGTGCGAGGAGG  
AGCTAGCACAGACCTGCCACCACTC

>2116

ATCCATGATTGACCCACCCGGGCCACCGTCCCTGATGCTGTGCTCAAGTGTCGCACC  
GCAGGCATCCGGGTATGCCACTGTGGGGAGGAACAAGTGGAGTGAGGACAGAGGATG  
GCAGCAGGATTTGGGTTGAAGAACC

>2117

CGGAAGGCAGCGAGACAGTGGAGGACATCGCTGCCCCGCTCCGTGTGCCCGTAGACC  
AGGTTAATCGCAAGTAAGCCCCCAGACCTCCCCGGGGTTCTCCCACATCTGGCAC  
AGACCGAGGTCCCAGCGAGGTCCTC

>2118

CCCCGAGATGGTGTTTGCGCGCACCAGCCCCAGCAGAAGCTGGTGATCGTGGAGAG  
CTGCCAGCGGCTGGTGAGCCCTGCTGATGAGGGTGGGCAGGCGGGCAGACAGGCGGG  
GCTGGTCTTGACCGCCTCTCACTG

>2119

GCCAAAATGCAGCTGACATGATCCTGCTGGATGACAACTTGCCTCCATTGTGACAG  
GCGTGGAGCAGGGTCCGAGCCACGCCAGGGGAGGGCAGGCAGTGTGGGCACAGGA  
GGGAGAGGGCTGTGAGGAGGCTGAGG

>2120

CATCACCGTCAGCGTGCCCCTGCCCTCGGGTGCATCACCATCCTTTCATCGAACTCT  
GCACTGACATTGTAAGTCCACAGCCAGGGTACCCATCCACAGGGTGCCAGAGACAC  
TTGCCTGCAGATGGACAGGAGGG

>2121

CGTCCACGCAACCCAAAGCGTGACAGATTGGTCAACGAGCCCCTGGCTGCCTACTCCT  
ACTTCCAGATTGGTGGGTGCCCGTGGGCCGGGGAGCCTGGAGGTGGGGGGCTCTGCG  
CTGGGCTGCTCGCCTGCCCCAGGCC

>2122

CGTGGGGCTGCGGGCGCAGTGGGAGGACCACCACCTACAAGATCTGCAGGACAGCTA  
CGGCCAGGAGTGGGTGAGCCCTGCCCCGCCCATCCATCCCTGGGCTCCCTCCTTCC  
CAGGGCAACTTGCCTTGTGTGCGGC

>2123

TGTGCCAGATCGCCGATGTCCTCATCCGCAAGACGCGCGTCTCTCTGCCTTCCAGCA  
AGGCTTCTCAGGTGTCCCTGGCTGGCCCTTCTCCTGCCCTCAACCCTGGTCCCAAC  
TCCCATCAGATCCTGACTGTGGT

>2124

AGGTCTGCATCGGCTGCTTCTGTGCTACTGCCCCGGCATGCCAACATCTTCAACTTC  
ATGCCCATTCGGTGAGAGGCTGTGAGGGGCAAGGACAGGGAGGGGGCTGTAGGGCAC  
AGGCCTGGGATGGCCTTCACTTG

>2125

CTGCCCTACGGCATCCTCATCTTCTGTCTATGATGAGATCCGGAAGCTTGGAGTTCGCTG  
TTGCCAGGAGTGAGTGTGGAGACTGGGAGCCTGGGGGCAGGGGACTGAAACGTTT  
GAGCAGCTGCACCCACCTTTGATC

>2126

CTCGGGTGGAGTCTTCTGACAGCTGGTGCCTGCCCCGGGAACATCCTCCTGGACTCA  
ATCATGGCTTGTGTGAGTGTGGGGACCCCCCAAGTCCAGGGGATAGGGCAGGA  
ACTGATGGCCAGAGGAGAGCTGGGC

>2127

CCAGCAACCTGAATCTCAAACCTGGAGAGTGCCTTCGAGTGCAGGCGAGGTGGCTC  
CTGACGCTAAGAGGTGAGAAGTGAAGTCGGGGTGGTGGGCGGCAGGGACGGGCTTG

GTCCAGCAGGGAGGGCGTGGCCGCCA

>2128

GGACGGCGGGCCTGGGGACCGAGCAGCGGGAGGCTGTCTTCCCTTCCAGCCTGG  
AAGTGTTCAGAGGTGGGCTGCAGACCGGAACCGGGACCAGGACAGGGGCTGGG  
TGGGCTGGGGCGGGCTGGGTAGTGA

>2129

GGCCGAAGTGGCTAACCAAGAACTAAAGAAGACTTACCTGCGGAAAACGGGGAAA  
CGAAGACTGAGGAGGTGAGAAGTGTGTGTGTGTGTGTGTGTGTGTGTGTGTGTG  
TGATTGCTTTGACTCTGAACAGTAGT

>2130

CAAGAAGAAACACCCGGACTTCCGTCAATTCGCGGAATTCTCCAAGAAGTTCG  
GAGAGATGGAAGGTGAGGCAGGAGAGGGACGAGCTCAGGGGTGCAGGTGTGGTT  
TTCGGCTAGGAGGGCCTTAGGCAGGT

>2131

AAAATTACGTTCTCCAAAGGTGATAAGAAGGGGAAGAAAAGGACCCCAATGCTC  
CTAAAAGGCCACCGTAAGTTTAAATAACCCAAATTGCTCCTTGATTTTCTTCAGT  
TTATTAACTCTGTTGCTTCTTT

>2132

TGAGCAGTCAGCCAAAGATAAAACAACCATATGAACAGAAAGCAGCTAAGCTAAAGGA  
GAAATATGAAAAGGTACAGTGTATCTTTTTTAAAGCCGTGGATAAGACTAGGTATAGG  
TAATAACTGTAGAAAACCTGGGAA

>2133

AGCCCAGGGACAACCTGCCGCCAGCGCCTCAGAAGAGAGGACGCGGCCGCCCA  
GGAAGCAGCAGCAAGTCAGTACGAGGGCGCGGTGGGGGACCAGCCACCCCGTCCC  
CACTGCCGGGGCCAGACACGCGCGGG

>2134

CTCTCCTAAGAGACCCAGGGGAAGACCCAAAGGCAGCAAAAACAAGAGTCCCTCTAA  
AGCAGCTCAAAGGTGAGATTCTCAAGTCAAGCTCTCCTAACTTCATCAATGACTGA  
CTACAGGAGCCTGCCTGTAACCTTC

>2135

GCCGGTGTGCGCTCCTAATTGGGACTCCGAGCCGGGGCTATTTCTGGCGCTGGCG  
CTCCAAGAAGCGTGAGTTCGCGGCCGCTCCGGTGGCTTCTTTTTTTATATCTATAATT  
TAATTAATTATTTATTATTG

>2136

TCCTCAGCGCCAGCACCGCCGCTCCCGGCAACCCGGAGCGCGCACCGCAGGCCGGC  
GGCCGAGCTCGCGGTGAGTCGTCCCGGGGCCGCGGCGGCGGCGGAGGGGGG  
CGCCCGCGCCCGCCGACGTCGCCCC

>2137

GGCGGGGAGAGACAGGGCTGCGGCGCGGCAGGAGAGTGGGGGGTGGGGCGCCCC  
CGCAGCTCAGGGAAGTTCTGGAAGTGAAGGAGATGGGGAGGAACCCCAAATTCGGC  
CCTACGCCCTCTCGGCCCTTCTCTCGC

>2138

GGTCTGAACTCCTGACCTCAAGCAGTCTCTGCTTTGGCATCCCAAAGTGCTGGGA  
TTACAGGCATGAGTACCTCACCTGGCCATAAATCATTTTCAAATGGTCTAGTTCTTAT  
TTTGGTTAGAGTGAAGATTTCT

>2139

GAAGCGGGGCCGGGGCAGGCCGCGCAAGCAGCCTCCGGTGAGTCCCGGGACAGCGC  
TGGTAGGGAGTCAGGTGGGTGTCCAAACCTTTGCTTCACTTGGTTTACCCTTTGGGGCT  
AGGGAGGTGCCTGGAGTTTCATTCA

>2140

AGTGCCAACACCTAAGAGACCTCGGGGCCGACCAAAGGGAAGCAAAAACAAGGGTG  
CTGCCAAGACCCGGGTGAGACTTGAGATGGGACTACCCCTGGGTGGATGACTAGCAG  
AGGATCCTCTTGTGGCACCATGGCCA

>2141

GAGCCGAGCCCGGCGCCGCCGCCAACCCAGATCTACCCCTGGATGCGCAAGCTGC  
ACATAAGTCATGGTAAAGCCAGCCTTTTTCTAAATCCACGCGACCGCGGGGACGCGGC  
TCTCGGTCCCCCTCTTCTCTG

>2142

AAGCAGATCTTCCCCTGGATGAAAGAGTCTCGACAGAACTCCAAGCAGAAGAACAGC  
TGTGCCACTGCAGGTAGCTCCCTGAGGTGGCCTACTGCCAGACCAAGCCCCCTCCAGA  
TTGACCCAAGGAAGCCTAGTCAGGG

>2143

AAGACATCGGGGACATTCTGCAGCAGATAATGACCATCACCGACCAGAGCCTGGACGA  
GGCCAGGCCAAGTGAGTGGCCCACTCCGGGACCCACACAGACCCAGCAAACCCC  
GTTACATGTTCTGAATCTTCTGGG

>2144

CACGCCCTAAACTGCCACCGAATGAAGCCTGCTCTCTTTAGCGTCCTGTGTGAAATCA  
AGGAGAAAAGTGGTATGTGGGCGCCCCCGGATTGCTCAACTCTGGGAACAGAACCC  
TGTTATTATAGGGCTAGAGTGTGA

>2145

CTCGGACTATCGCAGCAAACCTGCCAGATCCGTACATATACCACTCGGAGCTGGAG  
AAGTATGAGCAGGTAAGGAGAGGAGGCTTGGGTGGGTGGAGGGAAGGGCTCTGCAG  
GGGAATCCCATGGTCAAAGGGCTCC

>2146

TCCAGATGCAGCTGAAGCAGAGCACCTGCGAGGCTGTGATGATCCTGCGCTCCCGTTT  
CCTGGATGCCAGGTGGGCCAGGGACCCAGGCTGGCCCCAGCACTGGGCTCCTTC  
CCATTCCTCTCCAAGACCCTGAGCT

>2147

GAGTAACCCATATCCTAGTGAGGAGGCCAAGGAGGAGCTTGCCAAGAAGTGTGGCATC  
ACCGTGTCTCAGGTATTATGGAGGTTGCGGGAGGAGTTGTCAGGCAAAGTGCACGCAT  
CTCAGCTAGGTGCAGTGGTGTGTT

>2148

AAGACCGCCGTGTCAGTCACCCAGGGGGGCCACAGCCGCACCAGCTCCCCGACACCC  
CCTTCCTCTGCAGGTGGATCCCACTGTACCCCGGCTGTTTTGCACACTTCTGCTTTT  
GTTCCCACTTCTATCTAGGCAGG

>2149

TCTCTCAGGATCTGGAGACATGTTTCTGGGGATGCCTGGGCTCAACGGAGATTCCTATT  
CTGCTTCCAGGTGAGATGCCATCTCCTCTCGAATAGGGCTTTCCCAACTCCATTTT  
CTTACTTTAGGATACAAGACC

>2150

CTCGATGGGGCCAGGGGGCTATGGGGATAACCTCGGGGGAGGCCAGATGTACAGCCCA  
CGGGAAATGAGGGTGAGTGGATCCTGAAGCTCCTCTGTCCAGTTCTCACAGGACAG

AGGGGCATTTCCCTAGTAATGTT

>2151

TGGCGAGCCACTGGTGCTGAAGTGTAAGGGGGCCCCCAAGAAACCACCCAGCGGCT  
GGAATGGAAACTGGTAAGCGGGGCTCCTGTTGCAGCCTCCCAACTCCAGGGAGACC  
AGCAATGATTTGGATCCCCGTCCTC

>2152

ATTTTCCGGTGCCAGGCAATGAACAGGAATGGAAAGGAGACCAAGTCCAACCTACCGA  
GTCCGTGTCTACCGTAAGAATTCCAGGGTCTTCTCCAAGGCCTCCCTCTTACCTAAGAA  
AAAGCCTTCAACCCAGCCTTGCC

>2153

GAGGGAAGCTACCCTGCAGGGACTCTTAGCTGGCACTTGGATGGGAAGCCCCTGGTG  
CCTAATGAGAAGGGTGAGTCTAAGGTGCCCCCAAGCTGCCTTCTCCCTGATCTCAC  
TCCCACACCCACCCTGGGATAATTT

>2154

TGTAGCTTCAGCCAGGCCTTCCCCGACACCGGGCCTTGCGCACAGCCCCATCCAGC  
CCCGTGTCTGGGGTGAGCATAGGTGGGGAGGGCCCCAAGCTCACGTGAGCACGTTCT  
GGAAGTCTGACCCTTAGGGAAAGAG

>2155

TGGTGAACCGTAACCCTGACCTGTGAAGTCCCTGCCAGCCCTCTCCTCAAATCCAC  
TGGATGAAGGATGTGAGTGACCTGGAGAGAGGGGCTGGGAGGTAGGGTGAACCATAA  
CTAGCAACAGGGAGGGCAGAGGGCT

>2156

TACAGCTGTGTGGCCACCCATTCCAGCCACGGGCCCCAGGAAAGCCGTGCTGTCAGCA  
TCAGCATCATCGGTGAGACCTCTCCCAAGCCCTACAGACCCTGGGACTAGGGTGCAG  
GACAGCACAGGCTCTAATTTCTG

>2157

GCCTGGGGACAGCCGCCCTGCTCATTGGGGTCATCTTGTGGCAAAGGCGGCAACGCC  
GAGGAGAGGAGAGGTGAGTGGAGAAAGCCAGACCCCTCAGACCTAGGGCTTCCAGG  
CAGCAAGCGAAGAGGGGTCGGGGGGTG

>2158

GTCATTGCCCTCTGCTCTGGGACAGCTTTTTGCAGTGGACTCAGGCAATGATGTCAC  
GGATATCGCAGGTGAGTCTTTGGTTGGGTAGGAGTGTGCATCCACTCTGACCCTCTCG  
GGTCTGCACTCTCTGAGAAC

>2159

CATGGCTATGTGGAGCACTCGGTTCCGCTACCAGTGTAAGAATACTACAACTGCGCA  
CAGAAGGAGATGGTAAGATGTGGACAAGTCTCCATGCCCTACATAACAACCCCTTCT  
CTGACATTTCCATGATGGGTGGT

>2160

TACACCTTAAATGATAAGAAGCAGTGGATAAATAAGGCTGTTGGAGATAAACTTCTGA  
ATGTGAAGCAGGTGGGTGCTGAGCACTGAGCACTTAAGAGAGCAGGCAGGCGTCCAG  
CGGGGAACGTCCTAGAGGCACAGC

>2161

CATGGCTATGTGGAGCACTCGGTTCCGCTACCAGTGTAAGAATACTACAACTGCGCA  
CAGAAGGAGATGGTAAGATGTGGACAAGTCTCCATGCCCTACATAACAACCCCTTCT  
CTGACATTTCCATGATGGGTGGT

>2162

TACACCTTAAACAATGAGAAGCAGTGGATAAATAAGGCTGTTGGAGATAAACTTCCTG  
AATGTGAAGCAGGTGGGTGCTGAGCACTTAAGAGAGCAGGCAGGCGTCCAGCGGGGA  
ACGTCCTAGAGGCACAGCCTTCCAG

>2163

TTTGATACCTAATCATTATGCTGAGGATTTGGAAAGGGTGTATTTCCTCATGGACTAA  
TTATGGACAGGTAAGTAAGATCTTAAATGAGGTTTTTACTTTTTCTGTGTTAATTC  
AAACATCAGCAGCTGTTCTG

>2164

AGCACTGAATAGAAATAGTGATAGATCCATTCCATGACTGTAGATTTTATCAGACTGAA  
GAGCTATTGTGTGAGTATATTTAATATATGATTCTTTTTAGTGGCAACAGTAGGTTTTCTT  
ATATTTTCTTTGAATCTCT

>2165

CTGGCAAACAATGCAGACTTTGCTTTCCTTGGTCAGGCAGTATAATCCAAAGATGGTC  
AAGGTCGCAAGGTATGTATGACATTTGACACAGAATATTTTCTCATTGTAAGGGGGA  
TTAAGTGATTGCTTCTTTTAA

>2166

ATTTGAAATCCAGACAAGTTTGTGTAGGATATGCCCTTGACTATAATGAATACTTCAG  
GGATTGAAATGTAAGTAATTGCTTCTTTTTCTCACTCATTTTCAAACACGCATAAAAA  
TTTAGGAAAGAGAATTGTTT

>2167

GAGAAGGAAGTGAAGGAGATCAGGGCCTTGGACAAGGCCTTCAGACCAGAATTGAGA  
GAGGAATTTCTAGTAAGTAACTTGAGTCATGGGTCTGTGGCTCCATCTAAACTCTG  
CATGGGTGTGGGGAGGTTGACCTT

>2168

CACACCGCTGTATCATTGATGTCTTTGGTGTCACTCACAGAGAGTCCATCATGAATGT  
CAATGTGAAAGGTACAGTAGCCTGGGGAGGAGATAAAACAAGTTGGTTAATGAGGAT  
CAGAAAGAAGGACAAGAAAGGGA

>2169

GCAAAGTGGATGAGTTCCGCTTTGTGGCCACATGGTGTGATGAATATGAGCAGC  
TGTCTCTGAAGGTAAGGCAGGATTCTTTGTTGTCACCCCCAGTCCTTCTCCGTGC  
TCCCTCAACCCACCCACATACA

>2170

TCCGGGTGCGGCTCCACCCCTTCCACGTATCCGCATCAACAAGATGTTGCTCTGTGCT  
GGGGCTGACAGGTGAGCTTGGTCTGGGCCTTTAAGGCAGTTGGAGTCTCTACATTATT  
AGGCTTGCATTATTTTATCAGA

>2171

GCTGCAGAACAAGGAGCATGTGATTGAGGCCCTGCGCAGGGCCAAGTTCAAGTTTCC  
TGCCCGCCAGAAGGTATGTAGTGCTGCAGCCCCCTTCTCCACCTTTGCCCCAGCCTCC  
TGAICTAGTTCTTTCCATTGCTCC

>2172

ATTGATCATCAATACTTTCTACTCGAACAAAGAGATCTTTCTGAGAGAGCTCATTTCOA  
ATTCATCAGATGTAAGTCACTTATTAACCCAGAATCGGATTTTGGTTTCAGTGTGAACCT  
CTTGGGGGTGCTGTATGCTTA

>2173

CATAACGATGATGAGCAGTACGCTTGGGAGTCTCAGCAGGGGGATCATTACAGTGA  
GGACAGACACAGGTAGGCACCTGAACATTCAGTGGTTAAGTGAGCGGTGGAAGGGTG

GGGTGCTGCAACCCTTGGATCCCTG

>2174

GGAGGAACGAAGAATAAAGGAGATTGTGAAGAAACATTCTCAGTTTATTGGATATCCC  
ATTACTCTTTTTGTAAAGTTTTATGTAATTGCAGAGTGAATTTCTGTCTGTAGGTGATTG  
GGGTGACTGTACTACATCCTTA

>2175

TACTAATGAGGAGTACGGAGAATTCTATAAGAGCTTGACCAATGACTGGGAAGATCAC  
TTGGCAGTGAAGGTGAGTACTGATGGGTGCTTCAAGCTTGCCTTAGATTATCATCTT  
TCTCCACCACCCCAAATATCTTC

>2176

AACATCAAATTGTATGTACGCAGAGTTTTTCATCATGGATAACTGTGAGGAGCTAATCCC  
TGAATATCTGAGTAAGTATAGATAGGAAAATAATCACTGTCACTGATTAAGAAGTAC  
TTTCTGGGTGGGCATGGTGGCT

>2177

CTTACTGAACTGGCGGAAGATAAAGAGAACTACAAGAAATTCTATGAGCAGTTCTCT  
AAAAACATAAAGGTTGGTGTAAATAACCATTAGTTTTCCAATTGGCCTCTTTAGTTTTTT  
TTTTTTTTTTTTAATTCAGAAA

>2178

GAGATGGTTTCTCTCAAGGACTACTGCACCAGAATGAAGGAGAACCAGAAACATATCT  
ATTATATCACAGGTAAGAGAACAATGTTACAGTCATACACGTCGTTCTTACAACCTTG  
TAGGCTCTGTGGGTGTGTTTTTC

>2179

AGAGAAAAAAACAAAGTTTGAGAACCTCTGCAAAATCATGAAAGACATATTGGAGAA  
AAAAGTTGAAAAGGTATGTGAATACAGCATTTCTGATCATTGATACTTCTAAGGTGCT  
TTCAAGCTTAGTCATACATAGCCC

>2180

TCTGGCTTCAGTCTGGAAGATCCCCAGACACATGCTAACAGGATCTACAGGATGATCA  
AACTTGGTCTGGGTAAGCCTTATACTATGTAATGTTAAAAAGAAAATAAACACACGTGA  
CATTGAAGAAAATGGGTAAACTT

>2181

CCTCATCATCAATACCTTCTATTCCAACAAGGAGATTTTCCTTCGGGAGTTGATCTCTAA  
TGCTTCTGATGTAGGTGCTCTGGTTCCACATTTGGCATGGTTTTTTTTTTTGATACTTA  
GAAGGAGGGGAAAGGAGTG

>2182

AGCTGATCTCATAAATAATTTGGGAACCATTGCCAAGTCTGGTACTAAAGCATTTCATGG  
AGGCTCTTCAGGTATTGCAGTTCTGTAGGCATTCACTTATCTGTGTTCTTTGGTTTTTT  
GCTTCTTTAAAACCTTGAT

>2183

CACAACGATGATGAACAGTATGCTTGGGAGTCTTCTGCTGGAGGTTCTTCACTGTGC  
GTGCTGACCATGGTAAGTTAGCTTTTCTGTTACAAGGTAGTTGGGTTAGGATTTTCTGG  
GCTCACACCAGTAGCAGAAATTT

>2184

AGAAGAGAGGCGGGTCAAAGAAGTAGTGAAGAAGCATTCTCAGTTCATAGGCTATCCC  
ATCACCTTTATGTGAGTATGGACTTTTAAATCTTTTACACTTAACGTGCAGGATGTTTC  
CTGTTCTGGAGAATCTCATTGT

>2185

CACCCAAGAGGAGTATGGAGAATTCTACAAGAGCCTCACTAATGACTGGGAAGACCAC  
TTGGCAGTCAAGGTGTGAGAAGCCTTTCATGTTGGCTCAACATGCACATATGGAGAG  
GAATGAGTTAGGTGGAAGAGTGTT

>2186

AACATCAAACCTCTATGTCCGCCGTGTGTTTCATCATGGACAGCTGTGATGAGTTGATACC  
AGAGTATCTCAGTGAGTATCTCCTTGGCCTAATTTAGTTGGGTGAAGTCTTGGGAGGTT  
TTAGGCATTCTGCTAGGATATT

>2187

CTTCTCTGAGCTGGCAGAAGACAAGGAGAATTACAAGAAATTCTATGAGGCATTCTCT  
AAAAATCTCAAGGTAAAAAGGCAAATAATGCTTATTCCTTTACCACTTTCTTAGTAATA  
ACAATAAATTATTCCATTCAACA

>2188

GAGATGACATCTCTGTGTCAGAGTATGTTTCTCGCATGAAGGAGACACAGAAGTCCATCTA  
TTACATCACTGGTGCCTGACTCTGATTGAAGCCTTTTTGGAGGAGTGGGGAGCACAA  
TTAGGGCTTCTGGGAACTGGCA

>2189

AGAGAGCAAGGCAAAGTTTGAGAACCTCTGCAAGCTCATGAAAGAAATCTTAGATAA  
GAAGGTTGAGAAGGTAAGCCATTCTGGGGCTAGGATATATTTGTAACATCTTCGAGGT  
GGGCTCCCTCACAAGCATGTTTCT

>2190

TCTGGCTTTTCCCTTGAGGATCCCCAGACCCACTCCAACCGCATCTATCGCATGATCAA  
GCTAGGTCTAGGTAAGTAGCTTTGGTACTTGGTGTGGCAAGGAGTTTGCAACTCGT  
CTCCTCTATGGATTTGACTTAAT

>2191

GGCATCGGCTTCCACCTCCAGGCGCTCCCCGACGGCCGCATCGGCGGCGCGCACGCG  
GACACCCGCGACAGTGAGTGGCGCGGCCAGGCGCGAAGGGGCGGGGGCGGGGGGCA  
ACGGCCGCGGGCCAACCCGCTCAGTC

>2192

GGTGAGCATCTTCGGCGTGCCAGCCGGTTCTTCGTGGCCATGAGCAGCAAGGGCAA  
GCTCTATGGCTCGGTGAGTACCGCAGGGGTCTGGCTAGGCACCTAGTTGGGAACAGCG  
GACATGGCTAGCAGGCTCGTGGCTT

>2193

ATCATCACCACAGCCCTGGTGTGCTTGCTGCTAGCTGGGATGTGGCCGGAAGATGTGG  
ACAGCAAGAGCAGTGAGTGTGGCAGGCATATTTGCTTCTCTCTGGGGAGGGCAGA  
AACGTGGTCAGCCACTCTGGGGTTG

>2194

AAGAGATCCCCTGAGGGCAATCCTGTGTTACAGAAATACCAGCTCCATCTGCTCCAAT  
GAGGGCTTAATGTAAGTGATCACCTGCTCAATCTCTCCCTAGAGAACAGAACCCCGCC  
AGCCTGGAATTACAAGAGTAGAC

>2195

GGGCTCTGCGTCAACGCTAGTGCCGTGAGCCGCTGCGCGCCTACCTGCTGCCAGCGC  
CGCCAGCTCCAGGTGAGCCCGCCAGGTGCGCTGCGTGCAGCACCGCCACTGGCG  
CCGAAGGGCCTGGGGGTTGCTGGGT

>2196

AGTTGACTACGAGTCTCAGAGCACAGATACCCAGAACTTCTCCTCCGAGTCCAAGCGG  
GAGACAGAATATGTGAGAGCTTTTCTCTTGTTAAAGGAGGAGGGCAAGACCTGCCAA



GCCTGGGTACTCAGAGCCTCTTGA

>2197

CAATGTGCTGAGTCCCAGGGGTGTACACATTCCCAACTGTGACAAGAAGGGATTTTAT  
AAGAAAAAGCAGGTGAGTGAGGTCCTCAGTGTGTTTTCTTCTTCTGTTGACACAG  
AGGAGAAACCCATGTCACCAGCGC

>2198

GCGCATGAGACCCTGGCTAGAGATGCAGATTAATTCCAACCAATCCCGGGGCTCATCT  
GGATTAATAAAGTGAGTGTAACCTTTGGGTTTTCTGCCACTGTTTAAACCCATGTACT  
TCTGGAGGGACCAAAGCTTCA

>2199

CATGCTGCCAAGCATGGCTGGGACATCAACAAGGATGCCTGTTTGTTCGGAGCTGGG  
CCATTACACAGGTGTGTGCCTGGGACTCAGGCCTAGGAAGCCCAGGGTAGAGACAA  
GAGGAGGCACTCACGTTAACACAGA

>2200

AGGAACAAGGGCAGCTCAGCTGTGCGAGTGTACCGGATGCTTCCACCTCTACCAAG  
AACCAGAGAAAAGGTATCCAAGACTCTGGGTCCTTGGGAAGCCCTCAGGGAGGGAG  
GGTAGAAGGAGGTGAGCTGGGGCTGG

>2201

GATGACCACAGCAGCTACACAGTTCCAGGCTACATGCAGGACTTGGAGGTGGAGCAG  
GCCCTGACTCCAGGTGAGCTGGTCCAGGTCTGGCAGGAGACCCACAGGTGAGTGGG  
ATGACTCTTTCTTGGAGGCATGGT

>2202

GAAGTTGTCCGGACAGCACAGTGATCTGTACAACCTCCAGGTGTCACCCATGCCCT  
CCACCTCTGAAGGTTGGTGCTCCTGGGGCCTGGCCTGCTGCTTGACTGTCTGGGTCTG  
TGAAGGGCTTCTGAGAGAGAAAA

>2203

GGAGTCCAGCCCACCTCTGTCTATGGAGACTTTAGCTGTAAGGAGGAGCCAGAAATTG  
ACAGCCCAGGGGGTAAGAAGGCCCTGGATCCTTATGGCTTCTTAGATGAGGGAGAACC  
ACGTAGGGATGGAGAAAGCTTGGG

>2204

GAGTCCATGAAGAAGATGGCTCCTGCCATGGAATCCCCTACTCTACTGTGTGTAGCCTT  
ACTGTTCTTCGGTAAGTAGAGATTCAATTACCCCTCCAGGGAGGCCAAATGAATTTG  
GGGAGCAGCTGGGGTAGGAACC

>2205

AGTGGAGAATACAAATGTCAGCACCAACAAGTTAATGAGAGTGAACCTGTGTACCTGG  
AAGTCTTCAGTGGAAGTTCCAGGGATATGGAAATACAGATCTCTCATGTGAGGGATGG  
CTCATCTGAAGATGGGAAAAAAC

>2206

TACTACTGTACGGGCAAAGTGTGGCAGCTGGACTATGAGTCTGAGCCCCTCAACATTA  
CTGTAATAAAAGGTGAGTTGGTAAAGGAAAAGGAAAAGCATCCATAGCAGGGGAAGGA  
AGAGAGAACTTCTGAGCCTGAGCAG

>2207

CTGCACGCCCTCACCCGCGCCAAGGCGCCTGCGTGCAGGAGTCTGACGCCTCCGCT  
CCCCATGCTGCAGGTACCACAGTCCCGCCCCTGCTCCAGCACCTCCTGCCGCCCGCCC  
CCGCCCGCACCTCCCGCCCCACT

>2208

CCTTTGGGACGCCATCAGTACCTATGATGGCTCGAAGGCTCTCCATGTCACCAACATCA  
AAAAATGGAAGGTGAGGCCAGCAGGTGGGTGGGAACTCTCCTGTCAGAGGATG  
TAGCTTGAGTCGGCTGTGACAAGC

>2209

ATCAGGAGAAGAAATTTCAAATTTTACCTGCCAACTGCAACAAGAATGGATTTTATC  
ACAGCAGACAGGTAGGTGGCCTTGCCAGTGTGCGTCGTCAGGGTGAAAGGGACTACT  
GCCCTACATTCTGCCAAGCCACG

>2210

CTGGTTCCCTGCCACAGACCTTCCAGGAGAATGACCTGAGCACCTTCTTTCCCTTCAT  
CTTTGAAGAAGGTAGTTAGCCAAGAGCAGGCAGTAGATCTCCACTTGTGTCTCTTGG  
AAGTCATCAAGCCCCAGCCAACT

>2211

AGCTTGGTGATGTCTGGTCCATATGAACTGAAAGCTCTCCACCTCCAGGGACAGGATAT  
GGAGCAACAAGGTAAATGGAAACATCTGGTTTTCCCTGCCTGGCCTCTGGCAGCTTG  
CTAATTCTCCATGTTTTAAACAA

>2212

GGGCCTCAAGGAAAAGAATCTGTACCTGTCCTGCGTGTTGAAAGATGATAAGCCCACT  
CTACAGCTGGAGGTAAGTGAATGCTATGGAATGAAGCCCTTCTCAGCCTCCTGCTACCA  
CTTATTCCCAGACAACCACCTTC

>2213

AAGCAAAAACCTTCACTTAAGACCCAGGGACTTAATCAGCAATATCAACGTAATAGTTC  
TGGAATAAAGGTAAGGCATTACTTTATTTGCTCTCCTGGAAATAAAAAAAAAAAAAAGT  
CAGGGGGAAAAGTACCACATTTT

>2214

TACAAAGAAAACACAGCTACAACCTGGAGCATTACTGCTGGATTTACAGATGATTTTGA  
ATGGAATTAATGTAAGTATATTTCTTTCTTACTAAAATTATTACATTTAGTAATCTAGCTG  
GAGATCATTCTTAATAAC

>2215

AAGCAAAAACCTTCACTTAAGACCCAGGGACTTAATCAGCAATATCAACGTAATAGTTC  
TGGAATAAAGGTAAGGCATTACTTTATTTGCTCTCCTGGAAATAAAAAAAAAAAAAAGT  
AGGGGGAAAAGTACCACATTTTA

>2216

CTGCCCTGCTGGGAGTGGGGCTGAACACGACAATTCTGACGCCAATGGGAATGAA  
GACACCACAGCTGGTGGGAAATCTGGGACTGGAGGGGGCTGGTGAGAAGGGTGGCT  
GTGGGAAGGGGCCGTACAGAGATCTGG

>2217

TCGAGTACATGAATTGCACTTGAACAGCAGCTCTGAGCCCCAGCCTACCAACCTCAC  
TCTGCATTATTGGTATGAGAAGGGACGAGGGGGAGGGGATGAAGAAGAGGTGGGTTG  
GATCAGAGACCAAGAGAGAGGGTAG

>2218

GTTGTTCACTCCAGGACCCACGGGAACCCAGGAGACAGGCCACACAGATGCTAAAA  
CTGCAGAATCTGGTAATTTGGAAAGAAAGGGTCAAGAGACCAGGGATACTGTGGGA  
CATTGGAGTCTACAGAGTAGTGTCT

>2219

CAACAGATTCTTGAACCACTGTTTGGAGCACTTGGTGCAGTACCGGACTGACTGGGAC  
CACAGCTGGACTGTGAGTGACTAGGGACGTGAATGTAGCAGCTAAGGCCAAGAAAGT

AGGGCTAAAGGATTCAACCAGACAG

>2220

CTCTGTGGAAGTGCTCAGCATTGGAGTGAATGGAGCCACCCAATCCACTGGGGGAGC  
AATACTTCAAAAAGGTAAAATGGGCCACATGACCCAATCCATGAGCCCAACACCCCG  
CCTTTCTAACACCACTGTCTTTTGC

>2221

CCGTGGTTATCTCTGTTGGCTCCATGGGATTGATTATCAGCCTTCTCTGTGTATTCTG  
GCTGGAACGGTGAGATTTGGAGAAGCCCAGAAAAATGAGGGGAACGGTAGCTGACAA  
TAGCAGAGGAGGGTTTTGCAGG

>2222

GACGATGCCCCGAATTCCCACCCTGAAGAACCTAGAGGATCTTGTTACTGAATACCAC  
GGGAACTTTTCGGTGAGAACGCTGTCATAAGCATGCTGCAGTCTATCAACTGCCAACT  
GCCTGCCAGCAAGACAGACAGAGT

>2223

CCACGGACACAAGTGCGATATCACCTTACAGGAGATCATCAAACTTTGAACAGCCTC  
ACAGAGCAGAAGGTGAGTACCTATCTGGCACCATCTCTCCAGATGTTCTGGTGATGCTC  
TCAGTATTTCTAGGCATGAAAAC

>2224

CCACAGGCACAAGCAGCTGATCCGATTCTGAAACGGCTCGACAGGAACCTCTGGGG  
CCTGGCGGGCTTGGTAAGCTGCACTGTATTCTGGCAAGCCGGCCGCGTGGCTCCTGG  
TGGACAGCAGCCTCACTTCTAAACA

>2225

GCAAGGGGGTACTGTGGAAGACTATTCAAAACTTGCCTTAATAAAGAAATACATT  
GACGGCCAAAAAGTAAGTTACACACATTCAATGGAAGCTATATTTGCTGGCTGTGCC  
TATTTCTATGGAATTGACAGTTT

>2226

CACAAGTGCATTGGTGAAAGAGACCTTGGCACTGCTTTCTACTCATCGAACTCTGCTG  
ATAGCCAATGAGGTAATTTCTTTATGATTCCTACAGTCTGTAAAGTCATAGGTAATCA  
TTTGTGATGGTTCTTTACTAT

>2227

GCAAGGGGGTACTGTGGAAGACTATTCAAAACTTGCCTTAATAAAGAAATACATT  
GACGGCCAAAAAGTAAGTTACACACATTCAATGGAAGCTATATTTGCTGGCTGTGCCT  
ATTTCTATGGAATTGACAGTTTC

>2228

CGTGGCAGGCCAGGGGTGTCCAACCTTGGCGGGGATCCTGGACATCAACTTCCTCATC  
AACAAGATGCAGGTAGGCTGCAGGGGGAGCCCATGGGAAAGACAGCTACTGACAAAG  
TGAAATATGTATGAGGATGAAAAAA

>2229

AACAAGATACCACTGATTTTCAGTCGGGTGAAAAAATCAGTTGAAGTACTAAAGAAC  
AACAAGTGTCCAGTAAGTTTGTTCATATGTGATATGTTCTGTTGGTGATTTCTATGT  
GAATGGTGATGCCAACCTGTT

>2230

GGTGACAAATCACCTCCAGGTTGGGGATGCCTCAGACTTGTGATGGGACTGGGCAGAT  
GCATCTGGGAAGGTGAGTCTGTGCTTTGGGCTTCCAACCTCTCAAGTCAGCATGAAA  
TTCAGAAGGCAGAGAGGGACATGT

>2231

GCATCCCAGAGCCCCGCTCCTGGGTACCCACAACATGAACACCGTCCAGAAGCAAGG  
GCAGCCTCTGCAGGTGGGGCGGGGGTTGGAAAAACATTTATCAAACGGTTGAGTTGGGT  
GCAGGGGATGCAACATGATCAAACA

>2232

CAGAGAACTTGCCACGGTGTTCATGCTGTGGCTGGTGGTTCCAGGCTGCACGCTCCA  
TTCTAGGAAAGGGTGAGGCTTCTGATCATCAGTCTTAACAGGGGACTGTCCTATGGGT  
ACCTGTATACGCTGCCGGGAGTG

>2233

TGGCTCCTGGCCTGCATCTGCATCTGCACCTGTGTCTGCTTGGGAGTCTCTGTCACAGG  
GGAAGGACAAGGTGAGGGCTGGGCACTAATGTCTGTATGAGGTGGTGGGAGAACTAG  
GGCATGTTTGGGGGACTGGGTTGT

>2234

TCAGGATCGATTGCCACTGGTCTGCCCCAGAGCTGGGACAGGGCTCCAGCCCCTGGCT  
CCTCTTACCAGGTGAGCATGGAGGGCCATGCCACCTGGACAGGGATGAGGGTGAG  
TTCCCAGGATTGAAGCAGCTATGC

>2235

TTCCACCACTGCATGTCTGGGAGGGAGCAGGTCAGCCTGGTGGACCCGGAGTACCTGC  
CCCGGAGACACGGTGAGCAGCAGCTATAGGTCTGGGGCGGGGCCGCTTGGCAAGAAC  
ATCCTGGCTGCTTGGGGGTTTGGAG

>2236

TGCCTTGGAGCCAATGACCACACTTCTCAGCTATGAGCTGGCCTTCAAGAAGCAGGAA  
GAGGCCTGGGAGGTAACACTTTGGCTGGCTTCCCTGGGGGCTCTCTCTGGGAACA  
GCAGTCCAGGGTAGACTCCCCACT

>2237

GAGGAGCGTTATACAGGCCAGTGGAGTGAGTGGAGCCAGCCTGTGTGCTTCCAGGCT  
CCCCAGAGACAAGGTGGGCACTGCTGTGGCTGCTGCACTTCCAGCGGAGTCTGGGCT  
GGGCGTCTTCTCCCCTGTTACCTCA

>2238

CCCTTGTGCTGTGTCCATCTTCTCCTGCTGACTGGCCGACCTACCTCCTGTTCAAG  
CTGTGCCCCAGGTAGGTGGCTGATGTGTGCGTGTGTGTACATGTGTGAGCGGGCAAGA  
GTGTGCATGTTAGTGTATGTGTG

>2239

CTACCAGAACGTGCCCTCTCCAGCGATGTTCTTCCAGCCCCTCTACAGTGTACACAATG  
GGAACCTCCAGGTGTGTGCAGAGACCACAGAAGGACATGGGGGGCAGGGGTTGCCCA  
GAGCTCTGGCCTGCCAAGATGTT

>2240

CGTCTACGTGCCAGACGACGGACTCACAGCACAGCAGCTTCAACTGCGGAGACG  
GCCTCACCTACAAGTGCGGGCCTATGGGGCTCACCTGGGCGAAGAGAGGGGCGGCAC  
CTGGGGAAAAGGCCAGATGGGGGCTT

>2241

TCTTAAGACCCCACTGGTTTCTCTCCCATGGACACAGTCACAGAGGCTGGGATGGCC  
ATAGCAATGGCGGTGAGCCCCATGGGGTGTGGGGGAAGGAGCAAGGACTCCATCGCC  
TTTCCCCAAAGGCATTAGTCCTGC

>2242

AGGCGGTATTGGCTTCATCCACCACAACTGTACACCTGAATTCCAGGCCAATGAAGTTC  
GGAAAGTGAAGGTCAGAAGGGCAACGATCATTAGCAAGCGCTCCTGGGAATTGCACT

GAGGTGGGGTGGGGTGGGAGTAGG

>2243

GGTGGGCATCATCTCCTCCAGGGACATTGATTTTCTCAAAGAGGAGGAACATGACTGT  
TTCTTGAAGAGGTGGGGTGCCACTGGCAGAGTAGATCCAAGCTCTAGCAGCCCAGGTT  
GAAGACAAGGGGCTTCTGTTGTCT

>2244

GACTTGGTGGTAGCCCCTGCAGGCATCACACTGAAGGAGGCAAATGAAATTCTGCAGC  
GCAGCAAGAAGGGTAAGTCTAGAGCTGGGAAAGGGCCTGGAATAATGCCTAGGGT  
CCTGATTCATGTCCTGCCCTGACCA

>2245

GGCACTCATGAGGATGACAAGTATAGGCTGGACTTGCTCGCCCAGGCTGGTGTGGATG  
TAGTGGTTTTGGGTGAGCCTGCTACACAGGTGGGTTGGGGCAATAGGGGCAGCTGCCA  
CATGACAGTCTGAGACTTACTTCT

>2246

ATCTTCAGATCAATATGATCAAGTACATCAAAGACAAATACCCTAATCTCCAAGTCATT  
GGAGGCAATGGTAAGGCAAGATTGTGCCCTGAAGGATGTGTGGTGGGAGTGGGTAAG  
CTGGGCTCCACCTTAACCTTCA

>2247

CTCATTGATGCAGGTGTGGATGCCCTGCGGGTGGGCATGGGAAGTGGCTCCATCTGCA  
TTACGCAGGAAGGTAAGAATACTTTGATAGGGCCACAGAGACCCCAGTTTCAGGC  
CCCACATACCTTGAACCAAGCAC

>2248

AGAAATATCGCGGTATGGGTTCTCTCGATGCCATGGACAAGCACCTCAGCAGCCAGAA  
CAGATATTTAGGTGGGACAGGCAAGCCAGTTACCCACCCCTAATCCTGCACTGACAG  
TCTCATCTCTGCTGTGACCTTGCC

>2249

TCCCTTACCTGATTGCTGGCATCCAACACTCATGCCAGGACATTGGTGCCAAGAGCTTG  
ACCCAAGTCCGGTGAGCTTGGGGAGCTGGGACATGGGTAGAGGGGCTGGTCCAGGGC  
CAGCTACCCACATTTGACCTCTGC

>2250

CTGGGGAGCTTAAGTTTGAGAAGAGAACGTCCTCAGCCCAGGTGGAAGGTGGCGTCC  
ATAGCCTCCATTCGTAAGTACCCTGTCTTGGTGGGGCCTCTGCCATACCTCATGCCTC  
CTTTCTCCTGCCCTCACCTCACA

>2251

CGAGTATAACAAGGCCACCAAAGATGACTACTACAGACGTCCGCTGCGGGTACTAAGA  
GCCAGGCAACAGGTAGGTGCTCCCTCCACCCAGGGGTCTGGGTCCCAGCCTGGTTT  
GTTCCCAACCCCAAGAGCATTC

>2252

AACCATATGTACCAAGTCCCAGCCAACTTGACACCTGTGCCTTCCATGAACAGCCA  
GAACTGCAGAAGGTACGTTCTGATGCAGGTCCCGGGCCAGTCATGCACTGCAGAGG  
GGTGCATATGTGCAGCCTCTGCC

>2253

CCCACACCTGAAGGCAGCCATATCCCTGAGAATGCCAAGGACCGCATTCTGGAATT  
GTGCCATGCAGGTGAGACCCAAGAGAGACCTGGCTGAACCCAGTCCCGGGAGTGAG  
TTGACCCATTGTCCGCACATGCAGG

>2254

TCTCCAGGCTGCTGGTGGAGCACATCTGGAAGAAGATCATGCACACGGATGCCATGAT  
CATCGACATGAGGTGAGTGGCCAGGGGTCAGTGCTTCTAGCCAGGACGCAGGGCTG  
CCAGGGGACAGTCAAAGCTATGGGC

>2255

CTGCTGGACAAGATCTACAGCCGGCCTGATGACTCTGTGAGTGAAGTCTGGACACACG  
CCCAGGTTGTAGGTACGTGGAGAAGCTTTCTCCTTTCTGCTGTCATTCTAGAAGCTTCT  
GGGAAACCAGGGAAAGACAGCTT

>2256

GCACTTTCCAGTGTGGGGGCATCCTGGTGCACCGCCAGTGGGTGCTCACAGCTGCTCA  
TTGCATCAGCGAGTGAGTAGGGGCTGGGGTCTGGGAGGAGGGCATCTATGCTGCCAC  
AGGATTGACAGGCCAGTGGCATT

>2257

CCCACCCAGGAACCCGAAGTGGGGAGCACCTGTTGGCTTCCGGCTGGGGCAGCATC  
GAACCAGAGAATTGTATGTGGGGCAGACTGTGTAGCCCAAGGCGGGGATGGGGACT  
CCTGCGTCCAAGGGAGAAAGGGCCAG

>2258

CCACGTCCAGAAGGTGACAGACTTCATGCTGTGTGTCGGACACCTGGAAGGTGGCAA  
AGACACCTGTGTGGTGAAGCAGCCCTGCCCCAGGGTCTGGAAGGGCTGAGGGAGGG  
GACTCAGCCTCTGAACTGGCTTCTGA

>2259

GATGGGCACACTGTGGGGGTGCTCCTGGTGCACCCCCAGTGGGTGCTCACAGCTGCCCA  
TTGCTAAAGAAGTAAGTAGGACCCTGGGATCTGGGGAGGGAATGGCTGTGTCCACA  
GGAATAACAGCGGGATGCTTCCCC

>2260

CCCACCCAGGAGCCAGCACTGGGGACCACCTGCTACGCCTCAGGCTGGGGCAGCATC  
GAACCAGAGGAGTGTACGCCTGGGCCAGATGGTGTAGCTGGGAGCCCAGATGCCTGG  
GTCTGAGGGAAGTGGGGCCAAAGAAC

>2261

TTACTCTGAGAAGGTGACAGAGTTCATGTTGTGTGCTGGGCTCTGGACAGGTGGTAAA  
GACACTTGTGGGGTGAATCATCCCTACTCCCAACATCTGGAGGGGAAAGGTGAGTGA  
AGACCCTAATTCTGGGCTGCAATCT

>2262

ATTGTGGATTTGGTCAAGTCAAGAAGGACGTCTTGATGGTGTGCTGGTGAATTACAT  
TTACTTCAAAGGTGAGAGTCAGATCATTGGTATATGCTAAATCCACACCACCGCTCCA  
ACCCACTAATTTGTTGACTGGT

>2263

AAATGAGGGAGATTGAAGAGGTTCTGACTCCAGAGATGCTAATGAGGTGGAACAACCT  
GTTGCGGAAGAGGTAATCAGTGTGCTATGGGGGCTGAATCTACAGTACTATCCATCAA  
TGTAACCTTCTAATGAAAGACAG

>2264

CACGGATCTGTTCTCCAAGTGGGCTGACTTATCCGGCATCACCAAACAGCAAAAACCTG  
GAGGCATCAAAGTAAGTCGTCAACAGTCAGCAATCCCTAGAGAACTCGGTAGGGCA  
GTGCCCATGGGAGCTGCCAGGCGAT

>2265

GAGGCAGCGGCCTGCTGAGATCAAAGACTACAGTCCCTACTTCAAGACCATTGAGGAC  
CTGAGGAACAAGGTGGGTGAATGGGCAGCAGAAGGCACCATTCCAGCTAGCTCCTTC

TGGGAACAATTCATGCCCCAGGCCG

>2266

CAGTGGACAATGCCAATGTCTTCTGCAGATTGACAATGCCGTCTGGCCGCGGATGA  
CTTCCGCACCAAGTGAGTTTCAAATGGTGGGCCAGAACATCCAGTGTCCCAGAGTAG  
GGCATTTTTGGAGCAGTGTTC

>2267

AGCTGACCTGGAGATGCAGATTGAGAGCCTGAAGGAGGAGCTGGCCTACCTGAAGAA  
GAACCACGAGGAGGTGAGAACTATATGAAAAAGTCAGCTTAAAAGAAATGCAGGGAG  
GCTGGGTACAGTGGTGCCTGCCATA

>2268

GATGCGTGACCAGTATGAGAAGATGGCAGAGAAGAACCGCAAGGATGCCGAGGAATG  
GTTCTTACCAAGGTGGGTGTCATTTGAGGTGGAAGGAACCCAGACCACCTGCCTTCT  
GGGGCCTTCTGGTGTGAATGGCATT

>2269

GAGCGAGATCTCGGAGCTCCGGCGCACCATGCAGAACCTGGAGATTGAGCTGCAGTC  
CCAGCTCAGCATGGTAGGAATAGTGCCAGGAAGGGTGGTGCACCCAGGACTGGCAGG  
GAGAGAACGGCCACACTACTAATCG

>2270

TGGACGTGAAGACGCGGCTGGAGCAGGAGATCGCCACCTACCGCCGCTGCTGGAGG  
GCGAGGACGCCAGTGAGTCTTGGCCCTCCCTTAGTCCGCCCCCCCCATGGCACTCT  
CACGGCCCCACCATGTATCTAATGA

>2271

AAAGGTGAAGTCTCGAGAAAGGGAGCAAATCAAGTCACTCAACAACCAATTTGCCTC  
CTTCATTGACAAGGTGAGTTTCTCTCATTGCACTGGTAGCTGCGCCGGTCCACTCGG  
GATCGGTGCAGTCAAAACACACGC

>2272

AGAGTGATCAATCTCGGTTGGATTGGAAGTGAAGAACATGCAGGACATGGTGGAGGA  
TTACCGGAACAAGTAAGGGACCCTGTCTGGGCAGTTCTTAACTTTTGCTGTAAAAAAG  
AGTTCCAAGAAAAGTAATAAGCTA

>2273

GGTGGACCTTCAGGCCAACTTGACAACCTGCAGCAGGAAATTGATTCCTTACAGCA  
CTTACCAAGCAGTAAGTCTCCAGTTTCAACCAAGTTTATCTAAATGGAGAGTTTTTA  
AGCCGGAACCCACAACGATCTAG

>2274

GGTCAAGGCCAGAACGAGGATATAGCCAGAAAGAGCAAAGCTGAGGCCGAGTCCTT  
GTACCAGAGCAAGGTGAGTGGCTGAAAGCCTAGCCAGTTTCCCTGAAATGGCTGTCT  
TGCTATCCTGTGTATCTCATGTAT

>2275

GATAGAAATTTCTGAGCTGAATCGTGTGATCCAGAGACTTAGATCTGAAATCGACAATG  
TCAAGAAGCAGGTATGTGCTTTCTCTTCTACCACTCAGCTGTATGGAATGGGGTAAC  
CCTACAGGTAAAGGGCGAGTGC

>2276

TGAACACCAAGCTGGCCCTGGATCTGGAGATTGCCACCTACAGGACCTCCTGGAGGG  
AGAAGAAAGCAGGTGAGGAAGGGACGCTGGGAGTACTCGCCCCCTTCCCCTGGTCCT  
TCCTTCTTGCCACCGAATGATGAT

>2277

GTAATCTTCCGAGGTGCAAATTCTCAGAAAAATGCATTCCGGAAAAATCCCAGTGATCC  
AAAGCTTGACGTAAGTATTGATTATGTTTATATTATATATATTACATGAAGGTTTTATTT  
TTCTTTTTGTCTCGACATC

>2278

TGGGGCTTTGTTCCGCCACCCCAATTACTTGGGTGATCTCATCATGGCCTTGGCGTGATC  
CCTCCCATGTGGTAAGCATTTCAGAAGAGTGCTAGTTTGACCCTTTAGCCGCCAGAAA  
GATGTGTGTGTGTGCCTTTGT

>2279

TACTCGTTCCAGAAAGGAAGTTCTGGAGACCAGGAAATGACAGCTACACTTCTCACA  
GCAGGGTTCCAGGTGAGTTGTGCTCCTTCTCACTGAAACGCCATAGCTGTGCTTGCA  
GTGTTTGTGGCATCTGCCCTATAT

>2280

CTTGATCCATCACAGAAGGATCTGTGTAGAGATAACAGGCCAGAAAATTCAGAAACA  
TGTTCTCCCTGGGTAAGGAGAGGTGTGGTTATTATTGTCATTTTAGATTTTTGTTTGT  
TGTTGTTTATGTGTATAGTAGC

>2281

CAGGTCTCCACTGCTGCCCTTGCTGTCTCCTCTGCACCATGGCTCTCTGCAACCAGTT  
CTCTGCATCACGTGAGTCTGAGTTTCGTTGTGGGTATCACCCTCTCTGGCCATGGTTA  
GACCACATCAATCTTTTCTTGT

>2282

GGCAGATCCACAGAATTTTCATAGCTGACTACTTTGAGACGAGCAGCCAGTGCTCCAA  
GCCCGGTGCATGTAAGTGCCAGTCTCCTGCTCACCTCTATGGAGGTAGGGAGGGTC  
AGGGTTGGGGCAGAGACAGGCCAG

>2283

GCGTGTCCATCTGTGAGAAGGAGCCAGAGCCCAAGGGAGATGATGGAGCCTGAGGAG  
TACAGAGAGAGAGGTGAGCAACGGGCATCCCTGGCCCTTTCCTGCTGCTACTCTCTG  
CAGGAACGGCTGCTGGTGGGTGGCC

>2284

GAGTGCTCCTGAGGACCCCGACAGCTGGGACAGCATCTTTGGGGACATTGAACGAATC  
ATCATGCCTGGGGTGAGACACAGTGACCACAAGGGCAGTTCTGGATTTAGGGCACA  
GAAGGGTGGGTGGTGGCCTGGAGAA

>2285

CCTCACCTCTTGGCCCTCCCTGCTAGGAGACATGCTGGCTGATGCCATCAACTGCTTGG  
GATTCACCTGGGTGAGTAGCAACGGCTGTAACCTACTCGCAATGGGGAACGTAGCAGGG  
AGTGGTATCCTAGGGCAGACATA

>2286

AAAAATGCTGGGACTTCCAGAGCACTTCTTGCAACCACCACCCAGCAGCCAGGGCGG  
AGGCGTCTGCAGGTACCTCCCTTGCCAAAGCTTACCTAGCTTGGGGGCTAAGTAGC  
GAAAGACAAGCCAAACCCTAACCTG

>2287

GAAAACGTCTGAGCCCGATGCTGATGAGTCTGCCTAAATGCCCGACTCGTGGCCTAT  
GCCTCTGACCAGGTGAGTTGCCCGACGCAGGACAGCCCTTCGGGTTGGTGCTTGGCTT  
CTGGAATCTTGGTCTTGTGAGCAAT

>2288

CTCACTCCGAGGGGAAGCTCTTCAGAAGGCCATCGAGGAAGACAAGCAGCGGGGCTT  
GGTGCCCGTCTTTGTAAGTCAGGATATATGCCTAAGCTTAGAATGATAGAAGTGGATG



TGAGGAAGGAATTTTGGCAGAATT

>2289

AGTATGCCGACTCCTTACCTTTAATCCTTCCAAGTGGATGATGGTGCATTTTACTGTA  
CTGGGTTCTGGTGAGTGTAGCAGCCCAGCTCCGAGCACGCAGGAACGCCTTGCCTCCT  
CTGGAGAGACCTCAGCCACTAA

>2290

GCAGCAGACCTTCAGTGTGAATCCCATCTACCTCAGGCATGCCAACTCAGGCGTGGCC  
ACCGACTTCATGGTGAGTGGCCAGGGACGGGCAGCCTGGTGGGCTCGGGTGGCCAGT  
GGGAACTGTAGGCGTCTGACCCCCC

>2291

TCGCTCTGTAAACTCTGGTTCGTGATTCGGTCCTTCGGGGTGAAGAATCTTCAAGCAC  
ATGTCAGACATGTATGTAGCATGCTGTGGGGCTGAGCCTGTGTTCTCTGTTTTT  
TCATGGCGAGGAAGGCTGGTTT

>2292

GGTCAGAAACGACCCTTCTTTGAAATTCCTGCCAAGAGGCACCTTGGCCTGGTGGTT  
TTTCGTCTAAAGGTAATACCATCTTCCAAGCCCCTCTGTGAATGATGTCTTGTGGTGCTC  
CAGAGCCTCTCGGAAACACAAA

>2293

GTAACATGACTTCCAAGCTGGCCGTGGCTCTCTGGCAGCCTTCTGATTTCTGCAGC  
TCTGTGTGAAGGTAAGCACATCTTCTGACCTACAGCGTTTTCTATGTCTAAATGTGAT  
CCTTAGATAGCAAAGCTATTC

>2294

TCCACCCCAAATTTATCAAAGAACTGAGAGTGATTGAGAGTGGACCACACTGCGCCAA  
CACAGAAATTATGTAAGTACTTTAAAAAAGATTAGATATTTTGTTTAGCAAACCTAAAA  
TTAAGGAAGGTGGAAATATTTA

>2295

ATGGAAGAGAGCTCTGTCTGGACCCCAAGGAAAACCTGGGTGCAGAGGGTTGTGGAGA  
AGTTTTTTGAAGAGGTAAGTTATATATTTTTTAATTTAAATTTTTTCATTTATCCTGAGACAT  
ATAATCCAAAGTCAGCCTATAA

>2296

AACCACACCCTGGCCCAGACTGCCAGCCCTGACGGGACAGAGCCAGGGCACTCACCA  
GGCTGCAAGAACAGTGCTGGGGTAAGAGGGGAGCGGGGGATCCCGGGCCTGGGACC  
CAGCCTGCATTCTTTGTTTCATTCTT

>2297

AACTCTCCACCCTGGGAACTGCCCCGCCACTTTGGCCCTGCACTACCACCCTCACCC  
CTTCTCAACAGGTAGTGGGGATCTGGGGTGGGGGCGAGTGGGGATTGGGGGCCAGG  
GTCCTTGCCACAAGGACTTAGTGA

>2298

CCTTTTAGCATCTTCCCTAGCAGCCGGTTGAAGCGGAGACCAAGCCACTGTGAGCTGG  
ACCTGGCTGAGGGTGAGTGTGGGTTTGTGTGCCTTGTGGGTTTGTATGCCTGTATGTGC  
ACTTGTGGGTGCACAGAAGGCCT

>2299

CTTGTTGCTGGCGGTGCCTATCACTGTCCTGGCTGTGCTGGCCTTAGTGCCCCAGGATC  
AGGGAGGACTGGTGAGTGGCTGCAACAGGCCCTGGTGGAGAGTTGTATCTTGCGGAT  
GCTTGGCTCCCTCTGGTTGTGCCT

>2300

TTTCAGAAGCTGCCAGAGGAGGAGCCAGAAACAGATCTCAGCCCCGGGCTCCCAGCT  
GCCCCACCTCATAGGTAAGGACCTCCAAGACCTGAATAAGAGTGTAATAATCCGAAGG  
TTCCAGTTCTGCTCGCCCAGAGTCC

>2301

TTCAGGGGACAGGCCAACCCAGAGGACAGGATTCCCTGGAGGCCACAGAGGAGCAC  
CAAGGAGAAGATCTGTAAGTAGGCCTTTGTTAGAGTCTCCAAGGTTTCAGTTCTCAGCT  
GAGGCCTCTCACACTCCCTCTCTC

>2302

AGATTCTCGCCCTGAGCAACGGCCTGACGTCGGCGGAGGGAAGCAGGCGCAGGCTCC  
GTGAGGAGGCAAGGTAAGATGCCGAGGGAGGACTGAGGCGGGCCTCACCCAGACA  
GAGGGCCCCAATAATCCAGCGCTGCC

>2303

ACTTCTCAGGCTCAGTCGCCACCACCTACCCCGCCACCCCGCCGCTTTAACCGCA  
GGGAAGTCTGGCGTAAGAGCTTTGTGTGACCAGGGCAGGGCTGGTTAGAAGTGCTCA  
GGGCCAGACTCAGCCAGGAATCAA

>2304

CAGGGGCCCCATCTGGTCGACAGATGCAGTGGTTCTAGGATCTGCCAAGCATCCAGGT  
GGAGAGCCTGAGGTAGGATTGAGGGTACCCCTGGGCCAGAATGCAGCAAGGGGGCCC  
CATAGAAATCTGCCCTGCCCTGCG

>2305

GACGAAACCATGAAGAGCCTGATCCTTCTGCCATCCTGGCCGCCTTAGCGGTAGTAA  
CTTTGTGTTATGGTGAGAACTTTTCTCCATTTCTCTGTGTTACTTTTCTGCCTCTGA  
CTTTGGCTTACTTCTATTTTTT

>2306

TCATTAACAGGAGAAATGCAAATACCTTCATATCCCCTCAGCAGAGATGGAGAGCTAA  
AGTCCAAGAGAGGTCAGTAACAAAACCTTCATGAGGAGTGGTCATTTTTCCAGTGTAG  
ATCACAGATCTGAATTGGAGTGGG

>2307

GTGGTCATGGCGCCCCGAACCCTCTTCTGCTGCTCTCGGGGGCCCTGACCCTGACCG  
AGACCTGGGCGGGTGAGTGCGGGGTCAGGAGGGAAACGGCCCCTGCGCGGAGGAGG  
GAGGGGCCCCGCTGGCGGGGGCGCAG

>2308

AAGGCCACGCACAGACTGACAGAATGAACCTGCAGACCCTGCGCGGCTACTACAAC  
CAGAGCGAGGCCAGTGAGTAACCTCCGGCCCAGGGAGCAGATCACGACCCCCACCTCC  
ATGCCCCACGGACGGCCCGGGTACTC

>2309

CTGGAGGGCACGTGCGTGGAGTGGCTCCACAGATACCTGGAGAACGGGAAGGAGATG  
CTGCAGCGCGGGTACCAGGGGACAGTGGGGCGCCTCCCTGATCTCTGTAGACCTCT  
CAGCCTGGCCTAGCACAAGGAGAGG

>2310

GGAGAGGAGCAGAGATACACGTGCCATGTGCAGCATGAGGGGCTGCCGGAGCCCCTC  
ATGCTGAGATGGAGTAAGGAGGGAGATGGAGGCATCATGTCTGTTAGGGAAAGCAGG  
AGCCTCTCTGAAGACCTTTAACAGGG

>2311

CTGGTTGTCCTTGACGCTGTAGTCACTGGAGCTGCGGTCGCTGCTGTGCTGTGGAGAA  
AGAAGAGCTCAGGTAAGGAAGGGGTGACAAGTGGGGTCTGAGTTTTCTGTCCCACT

GGGGGTTTCAAGCCCCAGGTAGAAG

>2312

GCCGTCATGGCGCCCCGAACCCTCGTCCTGCTACTCTCGGGGGCTCTGGCCCTGACCC  
AGACCTGGGCGGGTGAGTGCGGGGTCGGGAGGGAACGGCCTCTGTGGGGAGAAGC  
AACGGGCCGCTGGCGGGGGCGCAGG

>2313

AAGGCCCACTCACAGACTCACCGAGTGGACCTGGGGACCCTGCGCGGCTACTACAAC  
CAGAGCGAGGCCGGTGAGTGACCCCGGCCGGGGCGCAGGTCACGACCTCTCATCCC  
CCACGGACGGGCCAGGTGCCCCACAG

>2314

CTGGAGGGCACGTGCGTGGAGTGGCTCCGCAGATACCTGGAGAACGGGAAGGAGACG  
CTGCAGCGCACGGGTACCAGGGGCCACGGGGCGCCTCCCTGATCGCTGTAGATCTCC  
CGGGCTGGCCTCCCACAAGGAGGGG

>2315

GGACAGGAGCAGAGATACACCTGCCATGTGCAGCATGAGGGTTTGCCAAGCCCCTCA  
CCCTGAGATGGGGTAAGGAGGGAGACGGGGGTGTCATGTCTTTAGGAAAGCAGGA  
GCCTCTTGACCTTTAGCAGGGTCA

>2316

CTGGTTCTCTTTGGAGCTGTGATCACTGGAGCTGTGGTCGCTGCTGTGATGTGGAGGA  
GGAAGAGCTCAGGTGGGGAAGGGGTGAAGGGTGGGTCTGAGATTCTTGTCTCACTG  
AGGGTTCCAAGACCCAGGTAGAAGT

>2317

GTGTCATGGCGCCCCGAACCCTCCTCCTGCTGCTCTCAGGGGCCCTGGCCCTGACCC  
AGACCTGGGCGCGTGAGTGACGGGTCTGCAGGGAAATGGTCGGGAGGAGCGAGGGG  
CCCGCCCGCGGGGGCGCAGGACCCA

>2318

AAGGCCCAGGCACAGACTGAACGAGAGAACCTGCGGATCGCGCTCCGCTACTACAAC  
CAGAGCGAGGGCGGTGAGTGACCCCGGCCGGGACGCAGGTCACGACCCCTCCCCAT  
CCCCACGGAGGGCCGGGTGCCTCG

>2319

CTGGAGGGCGAGTTCGTGGAGTGGCTCCGCAGATACCTGGAGAACGGGAAGGAGACG  
CTGCAGCGCGGGTACCAGGGGCCACAGGGCGCCTCCCGGATGGCCTGTAGATCTCC  
GGGGCTGGCCTCCCACAAGAAAGGG

>2320

GGAGAGGAGCAGAGATACACCTGCCATGTGCAGCATGAGGGTCTGCCAGAGCCCCTC  
ACCCTGAGATGGGGTAAGGAGGGAGATGGGGGTGTCATGTCCCTTAGGAAAAGCCGG  
AGCCTCTTGAGAGCTTTAGCAGGG

>2321

CTGGTTCTACTTGTAGCTGTGGTCACTGGAGCTGTGGTCGCTGCTGTAATGTGGAGGA  
AGAAGAGCTCAGGTAAGGAAGGGGTGAGGAGTGTGGTCTGAGATTCTTGTCTCACT  
GAGAGTTCCAAGCCCCAGGTAGAAG

>2322

CGGGTCACGGCGCCCCGAACCCTCCTCCTGCTGCTCTGGGGGGCAGTGGCCCTGACC  
GAGACCTGGGCTGGTGAGTGCGGGGTCAGGCAGGGAAATGGCCTCTGTGGGGAGGA  
GCGAGGGGACGCAGGCGGGGGCGCAGG

>2323

AAGGCCAAGGCACAGACTGACCGAGAGGACCTGCGGACCCTGCTCCGCTACTACAAC  
CAGAGCGAGGCCGGTGAGTGACCCCGCCCCGGGCGCAGGTCACGACTCCCCATCCCC  
CACGTACGGCCCCGGTTCGCCCCGAGT

>2324

GGAGAAGAGCAGAGATACACATGCCATGTACAGCATGAGGGGCTGCCGAAGCCCCTC  
ACCCTGAGATGGGGTAAGGAGGGGGATGAGGGGTCATATCTTCTCAGGGAAAGCA  
GGAGCCCTTCAGCAGGTCAGGGCCCC

>2325

CGGGTCACGGCGCCCCGAACCCTCCTCCTGCTGCTCTGGGGGGCAGTGGCCCTGACC  
GAGACCTGGGCTGGTGAGTGCGGGGTCGGCAGGGAAATGGCCTCTGTGGGGAGGAGC  
GAGGGGACCGCAGCGGGGCGCAGGAC

>2326

AAGGCCAAGGCACAGACTGACCGAGAGGACCTGCGGACCCTGCTCCGCTACTACAAC  
CAGAGCGAGGCCGGTGAGTGACCCCGCCCCGGGCGCAGGTCACGACTCCCCATCCCC  
CCACGTACGGCCCCGGTTCGCCCCGAG

>2327

CTGGAGGGCGAGTGCCTGGAGTGGCTCCGCAGATACCTGGAGAACGGGAAGGAGAC  
GCTGCAGCGCGCGGGTACCAGGGGCGAGTGGGGAGCCTTCCCCATCTCCTATAGGTCGC  
CGGGGATGGCCTCCACGAGAAGAGG

>2328

GGAGAAGAGCAGAGATACACATGCCATGTACAGCATGAGGGGCTGCCGAAGCCCCTC  
ACCCTGAGATGGGGTAAGGAGGGGGATGAGGGGTCATATCTTCTCAGGGAAAGCA  
GGAGCCCTTCAGCAGGTCAGGGCCCC

>2329

CTGGCTGTCTAGCAGTTGTGGTCATCGGAGCTGTGGTTCGCTGCTGTGATGTGTAGGA  
GGAAGAGCTCAGGTAGGGAAGGGGTGAGGGGTGGGGTCTGAGTTTTCTGTCCCACT  
GGGGGTTTTCAAGCCCCAGGTAGAAG

>2330

AAGGCCTCCGCGCAGACTTACCGAGAGAACCTGCGGATCGCGCTCCGCTACTACAACC  
AGAGCGAGGCCGGTGAGTGACCCCGCCCCGGGCGCAGGTCACGACTCCCCATCCCC  
CACGTACGGCCCCGGTTCGCCCCGA

>2331

GCGCCACCATCGCGTCGAGCCCCTGTCCCTGCGCCCAGAGGCGTGCCGGCCAGCG  
GCGGGGGGCGCAGGTGAGGCGTGCGGGGGCCCCGGGGCGGGGGCGGCACGCACCGCG  
GGGAGAGCCCATGCCAGGGACAGCCCT

>2332

TGGGCGCCCCTGGCCGGGACTTGTGGGGTCTTCTCCTGTCACTGGTTATCACCTTTA  
CTGCAACCACAGTAAGTCCCGAGGAATCGCGGCGGGAAGGAGTCGGCCCCGCTCCTG  
CCCTTGGCTCTGCTAGCTCCAGGC

>2333

CGGGTCACGGCGCCCCGAACCGTCTCCTGCTGCTCTGGGGGGCAGTGGCCCTGACC  
GAGACCTGGGCCGGTGAGTGCGGGGTCGGGAGGGAAATGGCCTCTGTGGGGAGGAG  
CGAGGGGACCGCAGGCGGGGGCGCAGG

>2334

AAGACCAACACACAGACTTACCGAGAGAGCCTGCGGAACCTGCGCGGCTACTACAAC  
CAGAGCGAGGCCGGTGAGTGACCCCGCCCCGGGCGCAGGTCACGACTCCCCATCCCC

CCACGTACGGCCCCGGGTCGCCCGA

>2335

CTGGAGGGCCTGTGCGTGGAGTGGCTCCGCAGATACCTGGAGAACGGGAAGGAGACG  
CTGCAGCGCGGGTACCAGGGGAGTGGGAGCCTTCCCCATCTCTATAGGTGCGC  
GGGGATGGCCTCCACGAGAAGAGG

>2336

GGAGAAGAGCAGAGATACACATGCCATGTACAGCATGAGGGGCTGCCAAGCCCCCTC  
ACCCTGAGATGGGGTAAGGAGGGGGATGAGGGGTCATATCTTCTCAGGGAAAGCA  
GGAGCCCTTCTGGAGCCCTTACAGCAG

>2337

CTGGCTGCTTAGCAGTTGTGGTCATCGGAGCTGTGGTCGCTACTGTGATGTGTAGGAG  
GAAGAGCTCAGGTAGGGAAGGGGTGAGGGTGGGGTCTGGGTTTTCTGTCCCACTG  
GGGGTTTCAAGCCCCAGGTAGAAAG

>2338

CTCCCCATCTATCTGCTTGGCCTGACTCAGAAATTCGGGCCATCTACAGGCTCCACCT  
TGGGCTGCAAGGTGAGAGGCTGATCTCGCTCTGGCCCTACCATAGGAGGGGGCGGA  
GGTGACGGAGAGGGTCCTCTCTCC

>2339

AAGAGGACCATTGAGGAAGCCATGGTCAAAAAGTGGGCAGACTTTGCTGGCAGACCT  
GAGCCACTTACCTGTAAGGGCTGGGGGCATTTTTTCTTTCTTAAACAAATTTTTTTTAA  
GAGATGGGTTCTTGCTATGCTGC

>2340

AGCCCTGCTGCTGGGCATCCGTGACTCCATGGAGCCAGTGGTGGAGCAGCTGACCCA  
GGAGTTCTGTGAGGTAAGGCTGGGCTCCTGAGGCCACCTCGGGTCAGCTCGCCTCTC  
ACAGTAGCCCCCGCCTGCCGCTG

>2341

CATTGAGGAGGAATTCTCTCTCCTCACCTGCAGCATCATCTGTTACCTCACCTTCGGAG  
ACAAGATCAAGGTGCCTCACAGCCCCTCAGGCCACCCCCAGCCCCTCCCTGAGCCTC  
TCCTTGCTCTGAACTGAAAGTAC

>2342

TATCCAGGAGGTGTTAAAAACCTGGAGCCACTGGTCCATCCAAATTGTGGACGTGATT  
CCCTTTCTCAGGGTGGAGACCTGGAGCCTAGACACCCCTGGGTTGTAGGGGAGAGGC  
TGGGGTGGAGGGAGAGGCTCCTTCC

>2343

TCTCCGGAGGCTGAAGCAGGCCATAGAGAAGAGGGATCACATCGTGGAGATGCAGCT  
GAGGCAGCACAAAGTGGGACTCTACGTGGACGGCCTCCCCTCGGCCACAGCCAGT  
GATGCTACCGGCTCAGCATTGCTAT

>2344

GATCGGTGGCACTGAGACCACAGCAAACACCCTCTCCTGGGCCGTGGTTTTTTTGGCTT  
CACCACCCTGAGGTGCGTCCTGGGGACAAGCAAAGGCTCCTTCCCAGCAACCTGGC  
CAGGGCGGTGGGCACCCTCACTCAG

>2345

TCGCCGAGGTGCTGCGCCTGCGGCCGTTGTGCCCTTAGCCTTGCCCCACCGCACCAC  
ACGGCCCAGCAGGTGACTCCCGAGGGTTGGGGATGAGTGAGGAAAGCCCGAGCCCA  
GGGAGGTCCTGGCCAGCCTCTAACTC

>2346

ATCATTCCGAACCTCCAAGGCGCCACCTGGATGAGACGGTCTGGGAGAGGCCACATG  
AGTTCCTGGCCTGGTATGTGGGGGGCCGGGGGCCTGCCGTGAAAATGTGGTGGAGGCT  
GGTCCCCGCTGCCGCTGAACGCCTC

>2347

CGGGTCATGGCGCCCCGAACCCTCATCCTGCTGCTCTCGGGAGCCCTGGCCCTGACCG  
AGACCTGGGCCTGTGAGTGCGGGGTTGGGAGGGAAACGGCCTCTGCGGAGAGGAAC  
GAGGTGCCCGCCCGGCAGGCGCAGGA

>2348

AAGCGCCAGGCACAGACTGACCGAGTGAGCCTGCGGAACCTGCGCGGCTACTACAAC  
CAGAGCGAGGCCGGTGAGTGACCCCGGCCCGGGGCGCAGGTCACGACCCCTCCTCAT  
CCCCACGGACGGCCCGGGTCGCCCC

>2349

CTGGAGGGCACGTGCGTGGAGTGGCTCCGCAGATACCTGGAGAACGGGAAGGAGAGC  
CTGCAGCGCGCGGGTACCAGGGGCAGTGGGGAGCCTTCCCCATCTCCCGTAGATCTCC  
CGGCATGGCCTCCACGAGGAGGGG

>2350

GGAGAAGAGCAGAGATACACGTGCCATGTGCAGCACGAGGGGCTGCCGGAGCCCCTC  
ACCCTGAGATGGGGTAAGGAGGGGGATGAGGGGTGATGTGTCTTCTCAGGGAAAGCA  
GAAGTCCTGGAGCCCTTACGCGGGT

>2351

GCTGTCTGGCTGTCCTAGCTGTCTAGGAGCTGTGGTGGCTGTTGTGATGTGTAGGAG  
GAAGAGCTCAGGTAGGGAAGGGGTGAGGAGTGGGGTCTGGGTTTTCTTGTCCACTG  
GGAGTTTCAAGCCCCAGGTAGAAG

>2352

CGGGTCATGGCGCCCCGAACCCTCATCCTGCTGCTCTCGGGAGCCCTGGCCCTGACCG  
AGACCTGGGCCTGTGAGTGCGGGGTTGGGAGGGAAACGGCCTCTGCGGAGAGGAGC  
GAGGGGCCCGCCCGGCAGGGCCAGG

>2353

AAGCGCCAGGCACAGACTGACCGAGTGAACCTGCGGAAACTGCGCGGCTACTACAAC  
CAGAGCGAGGCCGGTGAGTGACCCCGGCCCGGGGCGCAGGTCACGACCCCTCCCCATC  
CCCCACGGACGGCCCGGGTCGCCCCG

>2354

CTGGAGGGCGAGTGCCTGGAGTGGCTCCGCAGATACCTGGAGAACGGGAAGGAGAA  
GCTGCAGCGCGCGGGTACCAGGGGCAGTGGGGAGCCTTCCCCATCTCCTGTAGATCTC  
CCGGGATGGCCTCCACGAGGAGGGG

>2355

GGAGAAGAGCAGAGATACACGTGCCATGTGCAGCACGAGGGGCTGCCGGAGCCCCTC  
ACCCTGAGATGGGGTAAGGAGGGGGATGAGGGGTACTGTGTCTTCTCAGGGAAAGCA  
GAAGTCCTGGAGCCCTTACGTGGGT

>2356

GCTGTCTGGCTGTCCTAGCTGTCTAGGAGCTGTGGTGGCTGTTGTGATGTGTAGGAG  
GAAGAGCTCAGGTAGGGAAGGGGTGAGGAGTGGGGTCTGGGTTTTCTTGTCCACTG  
GGAGTTTCAAGCCCCAGGTAGAAG

>2357

CGGGTAGCAACTGTGACCTTGATGCTGGCGATGCTGAGCACCCCGGTGGCTGAGGGCA  
GAGACTCTCCCGTAAGTGCAGGGCCACTGCTCTCCAGAGCCGCACTCTGGGAACA

GGCTCTCCTTGGGCTGGGGTAGGGG

>2358

CGGGCGGAGTTGGACACGGTGTGCAGACACAACCTACCAGTTGGAGCTCCGCACGACC  
TTGCAGCGGCGAGGTGAGCGTCTGCGCCCGTCTGCGAGGCCCATCCTTGGCAGGGGC  
CCAGAGTCTCTGCCGCAGGAGGGGCG

>2359

CAGCGTGGAGACGTCTACACCTGCCACGTGGAGCACCCCAGCCTCCAGAACCCCATCA  
TCGTGGAGTGGCGTAAGGGGATATTGAGTTTCTGTTACTATGGGCCCCACAAGACAAA  
GGGCAGAGCTCCTTCTGACCCATT

>2360

ATTGGAGGCTTCGTGCTGGGGCTGATCTTCCTCGGGCTGGGCCTTATTATCCATCACAG  
GAGTCAGAAAGGTGAGGAACCCCAAGGGAAAAGGGGAAGATGGGCTGTGACCCAGA  
CCCTCTGTTTACGGGAGGTCCTGTCT

>2361

AGGGACACCGCACAGATTTCCGAGTGAACCTGCGGACGCTGCGGCGCTACTACAATC  
AGAGCGAGGCCGGTGAGTGACCCCGGCCAGGAGCAGGTCACGACCCCTCCCCATCCC  
CCACGGACGGCGCGGGTCCCCTCGA

>2362

CTGGAAGACACATGCGTGGAGTGGCTCCACAAATACCTGGAGAAGGGGAAGGAGACG  
CTGCTTACCTGGGTAAGAGGGTCCACAGGGCTACTCTCCATCTCCTTCTTGGGCTAG  
GACTGTGCCACAGCTGACAGACC

>2363

GGAGAGGAGCAGAGATACACGTGCCATGTGCAGCATGAGGGGCTACCCGAGCCCGTC  
ACCCTGAGATGGAGTAAGGAGGGGGATGGGAGGTCATGTCTTCTCAGGGAAAGCG  
GGAGCCCTTCTGGAGCCCTTCCGCAG

>2364

CTGTTCTCCTTGGATCTGTGGTCTCTGGAGCTGTGGTTGCTGCTGTGATATGGAGGAA  
GAAGAGCTCAGGTGGGGAAGGGAGAAGGGTGGGGTCTGAGTTTTCTGTCCCACTGG  
GTGTTTCAAGCCCTAGGTAAAAGT

>2365

TGGGATCATGGTAGTAGGAACCTCCTTTTACTCCTCTCGGAGGCCCGGCCCTTACCCA  
GACCTGGGCGGGTGATGCGGGGTGCGGATGGAAACGGCTTACCGGGAGTTACACAG  
GGGCCGGCCGGCGGGGGCGAAGGA

>2366

AGGGAAACCGCAAAGATTTCCGAGTGAATCTGCGGACCGTGCGGGCTTACTACAATC  
AGAGCGAGGCCGGTGAGTGACCCCGGCCAAGGGAGCAGGTCACGACCCCTCCCCATC  
CCCCACGGACGGCGCGGGTCCCCTC

>2367

CTGGAAGACACATGCGTGGAGTGGCTCCACAAATACCTGGAGAAGGGGAAGGAGACG  
CTGCTTACCTGGGTAAGAGGGTCCACAGGGCTACTCTCCATCTCCTTCTTGGGCTAGG  
ACTGTGCCCACAGCTGACACACCT

>2368

GGAGAGGAGCAGAGATACACGTGCCATGTGCAGCATGAGGGGCTACCCGAGCCCGTC  
ACCCTGAGATGGAGTAAGGAGGGGGATGGGAGGTCATGTCTTCTCAGGGAAAGCG  
GGAACCCTTCTGGAGCCCTTCCGCAG

>2369

CTGGTTCTCCTTGGATCTGTGGTCTCTGGAGCTGTGGTTGCTGCTGTGATATGGAGGAA  
GAAGAGCTCAGGTGGGGAAGGGAGAAGGGTGGGGTCTGAGTTTTCTGTCCCACTGG  
TGTTTCAAGCCCTAGGTAAAAGTG

>2370

GGGGTCATGGCGCCCCGAACCCTCCTCCTGCTGCTCTCGGGGACCCTGGCCCTGGCCG  
AGACCTGGGCGGGTGAGTGCGGGGTCAGGAGGGAACGGCCTCTGCCGTGAGGAGC  
GAAAGGTCCGCTGGCTGGGGCGCAG

>2371

GGAGAGGAACAGAGATACACATGCCATGTGCAGCACAAGGGGCTGCCAAGCCCCCTC  
ATCCTGAGATGGGGTAAGGAGAGAGATGGGGGCGGTCATGTCTTTAGGGAAAGCAG  
GAGCCCCCTCTGGAGACCTTTAGCAGG

>2372

GGTATCATTGCTGGCCTGGTTCTCCTTGGAGCTGTGGTCACTGCTGTGATGTGGAGGAA  
GAAGAGCTCAGGTGGGGAAGGGTGAGGAGTGGGGTTGAGTTTTCTGTCCCACTG  
GGGGTTTCAAGCTCCAGGTAGAAA

>2373

GGGGTCATGGCGCCCCGAACCCTCCTCCTGCTGCTCTCGGGGACCCTGGCCCTGGCCG  
AGACCTGGGCGGGTGAGTGCGGGGTCAGGAGGGAACGGCCTCTGCCGTGAGGAGC  
GAAAGGTCCACCTGGCTGGGGCGCAG

>2374

AAGGCCAGGCACAGACTGACCGAGTGAACCTGCGGACCCTGCTCCGCTACTACAAC  
CAGAGCGAGGCGGGTGAGTGACCCCGCCCGGGGCGCAGATCACTTACTCCCCGCTC  
CATGCCTCACGGACGGCCCTGGTCCC

>2375

CTGGAGGGCACCTGCATGGAGTGGCTCCGCAGACACCTGGAGAACGGGAAGGAGAC  
GCTGCAGCGCGGGTACCAGGGGCCATGGGGAGCCTGCTCGATCTCCTGTAGATCTC  
CCGGGCTGGCCTCGACAAGGAGGGG

>2376

GGAGAGGAACAGAGATACACATGCCATGTGCAGCACAAGGGGCTGCCAAGCCCCCTC  
ATCCTGAGATGGGGTAAGGAGAGAGATGGGGGCGCCATGTCTTTAGGGAAAGCAG  
GAGCCCCCTCTGGAGACCTTTAGCAGG

>2377

CTGGTTCTCCTTGGAGCTGTGGTCACTGGAGCTGTGGTCACTGCTGTGATGTGGAGGA  
AGAAGAGCTCAGGTGGGGAAGGGGTGAGGAGTGGGGTTGAGTTTTCTGTCCCACT  
GGGGGTTTCAAGCTCCAGGTAGAAA

>2378

GCCAGGGGCTTCATGCTGGGGCTCATCATCTGTGGAGTGGACATCTTCACGCACAGAA  
GGAGCAAGAAAGGTGAGAAATCCTGTGAGGTGACCGATACCACCTTTCTCCTGACTT  
GCTCACCTTCTTCCATGATGAGG

>2379

CTCCGTGCCGGACGGGTTCTCTCCGAGCTACCCAGCAGCTGGCGCAGGCCACCGG  
CAAGCCCCCAGGTTTGCCGGGAGGGGACAGGAAGAGGGGGGTGCCACCGGACG  
AGGGGTTCCGCGCTGGGAGCTGGGGAG

>2380

CGCAGAACCGCTCTACAGCAAGCTGCTGTGCGCCTGCTGGCCGAGCGCCTGCGCAT  
CAGCCCGACAGGTACGCGGAGTCGCGGAGGGGCGGGGGAGGGGCGGCGGCGCGCG



GCCAGGCCCGGGACTGAGCCACCCGC

>2381

CTACGGCGGCTGGGGGCTGGCTGCGGGACCCTGGGGGGCAGCGCCTGGTGGTCCTA  
CACCTGGAGGAAGGTATGTGGGGCCAGCCCAAGCTTGGCACCGCCGTCTTCCTCA  
GGTGGGCCGGGTCTCCTAGGGAAG

>2382

GCTGCTGGTGTGTACCCTGGGCCTGGCCCTGAGGTCACTGTGACGAGGGCTGGGCTG  
CCGGGTGCCAGGTACCAGGGAGTTGCATGGGGCAGTGCCCGGGCCGTGGCGGGGG  
CATGAATTTGTTGCAGGGTCTGCAG

>2383

GCGGTGGACCGCCCTGCGGGGGCTGGCGCGGCTCCGGGCTGGCCTTGACCCTGCAG  
CCCCGCGGAGAGGGTAGGTCCGCGTGGAGAGGGACGGGGAGCCGGGTGACTGCC  
CCGGGCCCCCAGCCCCTGAGCCAGCCG

>2384

TGCCGCGGTCCGAGCCCGCGCCGCTGCCTGCGCACGGCCAGCTGGACACCGTGCCT  
TCCCGCCGCCAGGTGCGCGCAGGCACCGGGACACGGGGCAGGAGCGGGCGGGGGC  
GGCGTGGCCTCGTGGCCGCTCTCAACT

>2385

CACCGAGGCTTCTCCTCCTCACCCCTCCTCGCCCTGCTGGCGCTCACCTCCGCGGTGC  
CCAAAAGAAAGGTTATGGGGGATGATCGAAGGAGGGCTGGGGACGGGCAGGCGAG  
GCCCTCCACTTCTGGGCTGGGCCG

>2386

GGCACCTGCGGGGCCAGACCCAGCGCATCCGGTGCAGGGTGCCCTGCAACTGGAAG  
AAGGAGTTTGGAGGTGAGGCGGGGGGACAGTACAGAGGGCAGGAGACGGGGGCACAGC  
CTCGCCGAAGCCTGGGGGGACCCTTGG

>2387

AATGCTCAGTGCCAGGAGACCATCCGCGTCACCAAGCCCTGCACCCCAAGACAAA  
GCAAAGGCCAAAGGTGAGCGAAAGGAGAAGGGGGTGGGGCTGTCGCGGGGGGCTGC  
CCCCCCCCCCCCGCTGTGAGGGGAC

>2388

CACCGAGGCTTCTCCTCCTCACCCCTCCTCGCCCTACTGGCGCTCACCTCCGCGGTGCG  
CAAAAAGAAAGGTGATGGGGGATGATCGAAGGAGGGCTGGGGACGGGCAGGCAGGC  
CCCTCCACTTCTGGCTGGCCGCTG

>2389

GGCACCTGCGGGGCCAGACCCAGCGCATCCGGTGCAGGGTGCCCTGCAACTGGAAG  
AAGGAGTTTGGAGGTAGGCGGGCGAGTACAGAGGGCAGAGACGGGGGCACAGCCTC  
GCCGAAGCCTGGGCGGACCCTTGGCGG

>2390

AATGCTCAGTGCCAGGAGACCATCCGCGTCACCAAGCCCTGCACCCCAAGACAAA  
GCAAAGGCCAAAGGTGAGCGAAAGGAGAAGGGGGTGGGGCTGTCGCGGGGGGCTGC  
CCCCCCCCCCCCGCTGTGAGGGGACA

>2391

GCACCCAGACACCCTGAACCAGGGGGAATTCAAAGAGCTGGTGCAAAAGATCTGCA  
AAATTTTCTCAAGGTAGGGCTGGACTCTGGCAGGTCTGACCCAGCCTCACCGCAGTTT  
GGGTTGACAAGGGAGGATGGGAGTA

>2392

GAATTTCCATGCCGTCTACAGGGATGACCTGAAGAAATTGCTAGAGACCGAGTGCCT  
CAGTATATCAGGGTGAGGAGGGGCTGGGTGTGGCGGGGGCTCTCTGCCTGGTCCTGGG  
GCTGCCCTGGGCCAGCGGTCCTCC

>2393

GAATTAAGTGAAACTGCCAGCATACTCATGCATGCAACAGCACATTCTCTGGTGCTTGT  
GGATGAATTAGGTAAGACATTAACCTTCTCATTGAAGACTATCTTAAAAACATTTGTAC  
AAATAACTATTTTTATAGAAG

>2394

ATTTTCAACTCACTACCATTCTAGTAGAAGATTATTCTCAAAATGTTGCTGTGCGCCT  
AGGACATATGGTATGTGCAAATTGTTTTTCCACAAATTCGGTTTTTGGAGAGGGCAC  
TTCTGTTGCTAGCACATGTAT

>2395

AAGTTATTCAAAGGGACATAGAAAAGCAAGAGAATTTGAGAAGATGAATCAGTCACT  
ACGATTATTTCCGTAATACTAATAATGGAATTAACTAACTGACCTAAGTTTC  
AAAGAAACAGTAAAAGGGGAAG

>2396

TTCCCTTCTCGCTTGGGAACTCTAGTCTCGCCTCGGGTTGCAATGGACCCCACTGCTC  
CTGTGCCGCTGGTAAGGGACGCCGGTTCTGTGCCTTGAATGCCAAATCCCAGAC  
ACCATAGAGAGTGTCCCTGGGTT

>2397

CCCGTTCTCTGAAAGGCTCTCCTTGCAGCTGCTTAGATACTGAATTTTTTCGGGAAG  
TGAAAACCAGGTAAGCATCGAAGTCCACTTGTCTTTAATTTACTTTTTATCAGTTTA  
ATTCTGAGATGAGTCGAATGC

>2398

GCAGCGCATCTGGCGACGGAGGGCGACATGGAGCTGGACGAGGCCGGCGACGTCAT  
CGGCGTGCTGCGGGTGCAGAGGGGCGGGCCGGGCCTGAGCGTGCAGGGTTCTGCTA  
AGGTCTCCGAGTCGGGTTCTGATCCA

>2399

CTCAGCGGCTGCCCCACCATGGCTACCTGGGCCCTCTGCTCCTTGCAGCCATGCTCCT  
GGGCAACCCAGGTAAGGCCTTCCCCTCGGGATCGATCCTGATGGCCACCCAGCCTCG  
CACTCTCAGGCTGGCTGAACCTG

>2400

CGACCTGGCAAGAGCCCACCTGCGTGATGAGGAGAAATCCTGCCCGTGCCTGGCCCA  
GGAGGGCCCCAGGTACGTGTTGGCTCTCTGCTCACCTGCCACAGTCCCTCTCCTTCC  
CTCCTCCCTGGTGGCTCCTGGGGT

>2401

GGGCCGTGACTACAGGACCTGTCTGACGATAGTCCAAAACTGAAGAAGATGGTGGAT  
AAGCCCACCCAGGTGAGGCCAAGGGGCTACAGAGCCTCCTGTCTGCTGCTCAATGGA  
GGGGCCAGCCTGTGACCAGGTGGG

>2402

CAGGGCCTCGTGGCCGGAGAACTGCCAGCAGATCTGTGAGGACCTCAGGTTGTGTA  
TACCTTACAGGTGAGTGACAGAGGTGACAGCAGGGATACCTCCTGAGGGTTGGAGAC  
AGCTTCCCCCAGGATATATCAAAG

>2403

ATTGCAGCGGACATCCCAGAAGTGTTGTTTCCCTTGCATGGGACGAAAGCTTGGCTC  
CAAAGCATCCAGGTGAGAGAGGCAGGCATGCAGAGCTGCTAAGTCTAGAGGGAAGGA

CGGGAGAGAGGTTCCAGAGTTGGGT

>2404

CTTCTTCTGGACTCATCTGCGCCACTTGTCCGCTTCACACTCCGCCGCCATCATGGTGA  
AGCTCGCGAAGGTAACCGCCTTGAGCGCGACGCAGACGTGTAGGCCTGCTTCCGAG  
GGGCGAGCGCGGCCGCCGCGGGGAG

>2405

GGAGGTAGAAGAAGATAGTGAAGATGAGGAAATGTCAGAAGATGAAGAAGATGATAG  
CAGTGGAGAAGAGGTAATTTTATCCAACCTAATGCAGAATTATGTTAAAACACAAAAT  
GGAGAGTTAAGACATGAAATTGGA

>2406

CCTGCCTCAGAGGATGAGGACGATGAGGATGACGAAGATGATGAGGATGACGATGAC  
GATGAGGAAGATGGTAAGGAGTTGTCTTGGTAGTTACTGGGCTTCTGATTACAAGGTAT  
CTTGAGATTCTGGGATCACATATT

>2407

GACGACGACGAAGATGATGAAGATGATGATGATGAAGATGATGAGGAGGAGGAAGAA  
GAGGAGGAGGAAGGTAAGTAAATTAGATTCTGACATACGACATGAGTTATGTTTAAAGG  
AGGCACTTAAGTGTTTGTGGCTAC

>2408

CCTGGAAAACGAAAGAAGGAAATGGCCAAACAGAAAGCAGCTCCTGAAGCCAAGAA  
ACAGAAAGTGGAAAGGTAACCTGCAGAATTAGGGGATATGGGGGAGATAAACAGCACA  
AATGATGAATAACAAAGGGACTTAATA

>2409

AAACTGGTATCAGCGATGTTTTTGCTAAAAATGATCTTGCTGTTGTGGATGTCAGAATT  
GGTATGACTAGGTAGCTGCTTCACTGCACGTTACATACCGTGGGTCTGTTAATTTTTCTT  
TCCCCTGTTAGCACAGTTACT

>2410

CTCACTGGTTTGAAAGTCTTTGGCAATGAAATTAACCTAGAGAAACCAAAGGAAAA  
GACAGTAAGAAAGGTATGTAAGGCTTTATGAGTTATGCAATGAACTCAGGAGCTAGAC  
TGCTAGGGAAAATGCTTTGTAACCC

>2411

ATGAATTGAAAGAAGTGTTTGAAGATGCTGCGGAGATCAGATTAGTCAGCAAGGATGG  
GAAAAGTAAAGGGTATGTTCTTCTATTGAAATGTAAGGGTTTTATTAACATTAATGCACT  
TCCTGCTTTATAAAAAGAAATAT

>2412

TCCCTGTACTATACTGGAGAGAAAGGTCAAAATCAAGACTATAGAGGTGGAAAGAATA  
GCACTTGGAGTGGAAGAAATTAGGCTTGTCCAAGGTTTTTCAGAATTGGTTGAGGGA  
ACTCTTCTAGTCTTTGATTTTCAT

>2413

CTCTTCAGGAAGTATTTGAGAAAGCAACTTTTATCAAAGTACCCCAGAACCAAATGG  
CAAATCTAAAGGGTAAGATAATACCTTTGTATCATCAGTTATAGGCCTATATATGTCTTAG  
AGGTCTAAGGACGTAAGGTCA

>2414

AGGGAAATTGAGGGCAGAGCAATCAGGCTGGAGTTGCAAGGACCCAGGGGATCACCT  
AATGCCAGAAGCCGTAAGTTACCTGGTTAGGGTGCTGTGGTTGGGGGTAGCACTCTC  
GGTGCTTTGTTTATTTTTGCACAAA

>2415

TAAAGGAGTCATTTGACGGCTCCGTTCCGGCAAGGATAGTTACTGACCGGGAAACTGG  
GTCCTCAAAGGGTAAGGGAAGGAAGCGTGAGTGCTGCTTCCAATTGAAGGGGTTTT  
TGTTCTGTGCAGACCTTGAGTCTAA

>2416

TTTGGAGGACGAGGTGGTGGTAGAGGAGGCCGAGGAGGATTTGGTGGCAGAGGCCGG  
GGAGGCTTTGGAGGTAAGGCACGCAGAGATAATGACACCACATAGCATGTGCTCTTCA  
GACCCTGTGCCCTGTCACGGTTCCT

>2417

CGGCTGCGACTCAGGCTCCGGCGTCTGCGCTTCCCCATGGGGCTGGCCTGCGGCGCCT  
GGGCGCTCTGAGGTGAGGGACTCCCCGGCCGCGGAGGAAGGGAGGGAGCGAGGGCG  
GGAGCGGGGCGGGCTGCGGGCCCCG

>2418

GAATTCCTGGAGAGTTGCCTTTGTGAGAAGCTGGAAATATTTCTTCAATTCCATCTCTT  
AGTTTTCCATGTAAGTATTCAGTTTACATTTATGTTGCAGGTTAATCTTAAGAATTGTATT  
GCTAAGGCTTCTAAGTGAA

>2419

TCCTTATCCCAGTTGATTGTGCAGAATACTGCCTGTCGTTGTCTTCTATTCACCATG  
GCTTCTTCTGGTAGGTAATCTATTTGGAAAATCTGAAATTGTAATGGGCTTATGATTTA  
GATTGAGATGGCTCAGGTCT

>2420

TCCAAAGAAGAAGGATCTTCCCTGGAGGAAATTCAGAAGAAATTAGAAGCTGCAGA  
AGAAAGACGCAAGGTAAACGAAGCAATTCACAGAAAGCAGGATATTAATTTATGTAAT  
GGGCAGATCAATTTTATTTCTATAA

>2421

CAAAATGGAAGCTAATAAAGAGAACCGAGAGGCACAAATGGCTGCCAAACTGGAACG  
TTTGCGAGAGAAGGTTGGTTTCTTACTTTGTAAAAGGGTTGAGCTTGGAGTTTGATGC  
ACCAATGAGTTGGCTTGA ACTAAGT

>2422

GAGCACAGCATCGTCGGGACCAGACTCGTCTCAGGCCAGTTGCAGCCTTCTCAGCCA  
AACGCCGACCAAGGTACAGCTTCACTTTGCTACTGGGTTGTGCATTCAGCTGAATTTCA  
TGGGGAAGTCCAAATTCTAAGGAA

>2423

CTCCGCTGCTACATCCAGAACTGCCCCCTGGGAGGCAAGAGGGCCGCGCCGGACCT  
CGACGTGCGCAAGGTGAGTCCCCAGCCCTGGTCCCCGCGGCTCCGGGGAGGGAGGG  
ACCCGACCCACAGGGGCGCGCCCCG

>2424

CCCTGCCAGTCCGGCCAGAAGGCGTGCGGGAGCGGGGGCCGCTGCGCCTTGGGCCTC  
TGCTGCAGCCCGGTGAGCGGGCAAGGCGCTCCGGGGCCAGGGGGAGGCGGGCGG  
GGGTGCGGCCGGGATTCCCCTGACTCC

>2425

CACACCAGTTGAAGCAGCATGTCATCGATGGAGAAAAAACCATTATCCAGAATCCCAC  
AGACCAGCAGAAGTAGGTGCCAACCCTACTTATTACCTTCTACCACACAAGACTAGTC  
ATCAGGTTTTTTTCTATACTCCCA

>2426

TGAAAAAGCTGAATTTGAGGTACATGAAGTATATGCTGTGGATGTTCTCGTCAGCTCAG  
GAGAGGGCAAGGTGAGGAGAGTACCAGAGTTGGCAAAGAGGGGTGACTGAGAGTGT

TCACCAGACCAAATGTTACTTAAAT

>2427

AAATGAAAACCTCACGTGCCTTCTTCAGTGAGGTGGAAAGGCGTTTTGATGCCATGCC  
GTTTACTTTAAGGTAACAAAGCAATGATAGTACTTGGAACCACTGCTGGACTCACAGAC  
CATAACCCAGGAACACTTTTTTC

>2428

CGGATGGGTGTGGTGGAGTGCGCCAAACATGAACTGCTGCAACCATTTAATGTTCTCTA  
TGAGAAGGAGGGTGAGTTCCAAAAGAGCTTCACTTTGGATTCCCTGATTATAAGATAT  
CCTTCCTGTAAGTTCAGAAGAG

>2429

GATAACCACTGGTCCCTTCGAGCCTGACCTCTACAAGTCTGAGATGGAGGTCCAGGAT  
GCAGAGCTAAAGGTTAGTATGGAATAGAAGGTGGTGGAGTATGTACATGGTATCCTGCTT  
GGGAGTGAGGGCTAAATGCCAGC

>2430

CGGCCACCACCAGCTGGCCAAGGAGGTGCTTATTAAGAAGGGCAAGGACTTCTCTGG  
GCGGCCTCAAATGGTAAGTGGTGCCCATCTCCTCCCTGCCCCCTCACCAACCCCTGGG  
ATTGGTTCAGGTCTTCAGACCATG

>2431

CTGCATCGAAGGCTGGCGATGGCCACCTTTGCCCTGTTCAAGGATGGCGATCAGAAGC  
TGGAGAAGATCAGTGAGTGCCAGGCTGGCCCCTGGGGCTGGGGCTGGATCCCACAGG  
AGCTGCTGGAGGGAGAGGAGGGTTG

>2432

GAATTACAATGAAGGCATCATAGACAACCTGAGCAAAGACAGCCTGGTGGACCTAGTC  
CCCTGGTTGAAGGTGAGATGCTGCCAGCCCTGCCTCAGGTTCTAGTAGACCCTGACA  
TTGTCCCAATCTCCTTCCTTTT

>2433

CCTGGAAAAATTAAGAGCCATGTTAAAATACGAAATGATCTGCTGAATAAAAATACTTG  
AAAATTACAAGGTAGGTGATAGAGCAGAAGAGAATATGAGTTAGGCTAAAAGGAATCA  
CAAGAGCAGGGTGGAGTCCATTC

>2434

TGGGGCTGGCGTGGAGACCACCACCTCTGTGGTTAAATGGACCCTGGCCTCCTGCTG  
CACAATCCTCAGGTGTGCTTCCCCCTCATTGATCCTAGACCCAGCCAGCCCAATCTCT  
GGGCTCCAGAGAAAGGGAGAGCC

>2435

TCCGAGAGGTGCTTCGCCTCAGGCCCGTGCCCTATGCTCATCCCCACAAGGCCAA  
CGTTGACTCCAGGTGTGCTGCCCTCCAGTGACATCTAGCCCCATGATGCATTCACTG  
CTTGCCAGCCCACCTGGCTCCCC

>2436

GTTATCATCAATCTGTGGCGCTGCATCACAATGAGAAGGAGTGGCACCAGCCGGATC  
AGTTCATGCCTGGTGGAGTCTGTCTGCTGCTGCGCCCTGGGCCACACAGCGAGCCTGGA  
CTCTGCTCCAACCAACCCAGTACC

>2437

GATGGCTTCTCATCGTCTGCTCCTCCTGCTGCTGGACTGGTATTTGTGTCTGAGGC  
TGGCCCTACGGTGAGTGTCTGTGACATCCCATTCATTTAAGATTCACGCTAAAT  
GAAGTAGAAGTGACTCCTTC

>2438

CTGCCATCAATGTGGCCGTGCATGTGTTTCAGAAAGGCTGCTGATGACACCTGGGAGCC  
ATTTGCCTCTGGGTAAGTTGCCAAAGAACCCTCCACAGGACTTGGTTTTATCTTCCCG  
TTTGCCCTCACTTGGTAGAGAG

>2439

CAAAGTGGAAATAGACACCAAATCTTACTGGAAGGCACTTGGCATCTCCCATTCCAT  
GAGCATGCAGAGGTGAGTATACAGACCTTCGAGGGTTGTTTTGGTTTTGGTTTTGCTT  
TTGGCATTCCAGGAAATGCACAG

>2440

CCTCCCATGGCCCTGCCAGTGTATCTTGGATGCTGCTTTCCTGCCTCATGCTGCTGTCT  
CAGGTTCAAGGTGAGATTGCTTTGCCTCTAGCACTGGGTTCCCTATGAATCCTCAGAGC  
TAACAAGAGGAGGAAGGCTCC

>2441

AGGCTCCAAGGCCTATGGCTCCCACTGCTATGCCTTGTGTTTTGTCACCAAATCCTGGA  
CAGATGCAGATGTGAGTGGTTAGATGTGGTGTGGAGGTGACCGGTCTCAGGGGGAG  
GAGGGTCTCCATTCCAGGAGAGTTC

>2442

GTCCTCCCTGGTGAAGAGCATTGGTAACAGCTACTCATACGTCTGGATTGGGCTCCATG  
ACCCACACAGGTGCCAGTATATCCTCCCTCTGTACCTCTCAAGGTGCTATTGTTGC  
CCAGGCCCACTCCCTGTCCCC

>2443

TTTGCATGGGAGAGAAATCCCTCCACCATCTCAAGCCCCGGCCACTGTGCGAGCCTGT  
CGAGAAGCACAGGTAAGAAACAGAGGAGCTGCCTCTTCCCAGTGTGTTCCATCTCATC  
CCCATTCTGGGTCTGACCTTCA

>2444

TGTGGGGTGGAAATGAGCTGGAAGGCCGTGATGCCATCTTCAAGCAGTTTCATTTCAA  
GACTTCAACAGGGTATGGCACCAGGGTGGGACAGAGTTTTCTGAGACGGGCTGATGG  
GGTACCTTACAAAGCATGTTCTCT

>2445

CATGACAAGAGTGGCCCTGCAGGCTGAGAACTGGACCACCATCCTGAATGGTTTAAAC  
GTGTACAACAAGGTGAGTGATGCTGTGTGCCTCTGTTGTGCTCTGCCCCATCCAATA  
CTGCGAACTCTGACACATTCTGA

>2446

GAGTGGGTCCCCGAGCTCTGTGACCTTATGCTCCACACTAACTCTGGCAGAGCCTCC  
GTTTCCTCATAGGTAAGATGGAATAATTACACCTCTGGATGGTGTGACTGAAGATTA  
AATACAGCGGGTGTCTCACTCA

>2447

ATTGTGGACTTGCTTAAGAACCTCGATAGCAATGCGGTCGTGATCATGGTGAATTACAT  
CTTCTTTAAAGGTAAGGCCCTTGGGCCCAAACCTGCACTTTCTTTGGCTTTTCTGCTGC  
TTTTATCTAAAGAATACCCAAT

>2448

AGATGCAGCAGGTGGAGAATGGACTGAGTGAGAAAACGCTGAGGAAGTGGCTTAAGA  
TGTTCAAAAAGAGGTACTTTCAGACTACCCAGGGCCAGCCTAAACCCACACAGCCCC  
AGGGAGACACACAGCCCTACCAGG

>2449

CAGTAACGTCTTACCTCCCATGCTGATCTGTCCGGCATCAGCAACCACTCAAATATCC  
AGGTGTCTGAGGTGGGTTTCAGAAGCTCCTATGCATCTGCTTCCAAGATCTATTCTGTT

CTATTCTTTCTATTCTACTCTA

>2450

CCCTGCGGTCTGAGGGCTTCGACACCTACCGCTGCGACCGAACCTGGCCATGGGCGT  
GAACCTACCAGGTGAGCCTCGCGCCCCGGGAAGCCGCCCGCCCGCTGCACCTC  
CGGCTGTGGCGAGCGCTTCGAGCCT

>2451

AATGAAGATATCATTACACTAAGGGCCGAAGATAACGCGGATACCTTGGCGCTAGTATT  
TGAAGACCAAGTAAGTCGTACCTTTTTACCGAGTCACGAAGCTACAGGAAAATCAAA  
ACTCTGTGTGAGTAGAACTCAA

>2452

AAGTGGAGAAGCTTGAAATGGAAACATTAAATTGTCACAGACAAGTAATGTCGATAAA  
GAGGAGGAAGCTGTAAGTAGTTTTAAGTAAAAAGAAAATAGTTTGAAGAGAATTATA  
ATACTGCTTATTAGGTTAATTGCT

>2453

AACTTCTTTACAAAAGCCACTCCACTCTCTTCAACGGTGACACTCAGTATGTCTGCAGA  
TGTACCCCTTGGTAAGATAATAAATTTGAACCTTGTTTTGATGGTAGTCATATGTGATAC  
ATACTCCTCAGTAATTAACCA

>2454

TGTCCATGTGCAAGTCTGTGGTGGCCCCCTGCCACGGATGGTGGCCTCAACCTGACCTC  
CACCTTCTCAGGTGGGACAGCGGGCAGGTGGGTTTCTGGGACGGAGAGGTCCAGGG  
ACACCCTCGGGCCTAACCCCTGACC

>2455

CAGTGTGAGACCCGAACCATGCTGCTGCAGCCCAGGGGTCCCTCGGCTCCTACAGCT  
ACCGGAGTCCCGTGAGTGGGGCCTCCACCGGCCCTGGGAGCCTGGGGGACACTTGC  
CGGGACGACTCTGGGCCAGCCCCCT

>2456

CAGTACGCGCTGCTGTACAGCCAGGGCAGCAAGGGCCCTGGCGAGGACTTCCGCATG  
GCCACCCTTACAGTACGTGCCCCGTGGACGCCGCCACACGCAGGCCTGACCAGAG  
GGGGGCTCCCAAGACCCAGGGCAGG

>2457

GAGAAATTCACCGCCTTCTGCAAGGCCAGGGCTTCACAGAGGATACCATTGTCTTCC  
TGCCCCAAACCGGTGAGGGGTCTAACTGATGGGGAGAGGATCAAGGTCAGATTAGA  
GGCAGGCAGGCAGTCTCCTGACTGG

>2458

TTCACCACCACCATGACACCGGGCACCCAGTCTCCTTTCTCCTGCTGCTGCTCCTCAC  
AGTGCTTACAGGTGAGGGGCACGAGGTGGGGAGTGGGCTGCCCTGCTTAGGTGGTCT  
TCGTGGTCTTTCTGTGGGTTTTGC

>2459

GTTAATTCCTCTCTGGAAGATCCAGCACCGACTACTACCAAGAGCTGCAGAGAGAC  
ATTTCTGAAATGGTGAGTATCGGCCTTTCTTCCCATGCTCCCCTGAAGCAGCCATCA  
GAACTGTCCACACCCCTTGCATC

>2460

GAGACACAGTTCAATCAGTATAAACGGAAGCAGCCTCTCGATATAACCTGACGATCT  
CAGACGTCAGCGGTGAGGCTACTTCCCTGGCTGCAGCCAGCACCATGCCGGGGCCCCT  
CTCCTTCCAGTGTCTGGGTCCCCG

>2461

CTGGGGCATCGCGCTGCTGGTGTGCTGGTCTGTGTTCTGGTTGCGCTGGCCATTGTCTATC  
TCATTGCCTTGGTGAGTGCAGTCCCTGGCCCTGATCAGAGCCCCCGGTAGAAGGCAC  
TCCATGGCCTGCCATAACCTCT

>2462

GTACCCACCTACCACACCCATGGGCGCTATGTGCCCCCTAGCAGTACCGATCGTAGCC  
CCTATGAGAAGGTGAGATTGGCCCCACAGGCCAGGGGAAGCAGAGGGTTTGGCTGGG  
CAAGGATTCTGAAGGGGGTACTTG

>2463

TGCGGCAGTGCAGCCCTGGGACTTCCCTCGCCTTCCACCTCCTGCTCGTCTGCTTAC  
AAGCTATCGCTGTGAGTGGCTGGGGCTCAAGCCTGGGGAAACCCAGGCTGTTTTGTG  
GGGAAACTGAGGCTGGGATGGTG

>2464

CCTCGCCGGAGGAGCTGAACCGCTACTACGCCTCCCTGCGCCACTACCTAACCTGGT  
CACCCGGCAGCGGTGAGCGCAGGCGCTGAGCGGGACCCCTGGTGCTCTACCCCTGCG  
GCCCCGCTCCACCTGGGGGCGTGCC

>2465

GAGACGGCCCGGACACGCTTCTTTCCAAAACGTTCTTCCCCGACGGCGAGGACCGCC  
CCGTACAGTTCGCGGTAAAAGCGCCGTTACCACACATCCTGCATCCGAGAGAGCGGCC  
TGGCCCTACCCTGGCAACATCATTT

>2466

CGCGCCACCCGCCAGGAGATGCTGTTCTTGGCGTTGCTGCTCCTGCCAGTTGTGGTCCG  
CCTTCGCCAGAGGTGAGAGCAGAAACCAGGCTGGGAGGGCCAGCAGCGGCGAGGGG  
GAGTCCGGGAAGCCCTGGGGCTGGGA

>2467

TCCGTCCAGGCACATCACCAGCCTGGAGGTGATCAAGGCCGGACCCACTGCCCCAC  
TGCCAACTCATGTGAGTCCCTCGCACTGCATCAGTTAGTGCTCCCGCTCCGTGCCTCCT  
CTGCCCATCCCTCCCCCTTCTAA

>2468

GAGGCGCTCCTTCGACATCCCGCCGCCCCGATGGACGAGAAGCACCCCTACTACAAC  
TCCATTAGCAAGGTGGGCTGCCTTTGCTGGGAAGGCCTCTGGGAAGCTGCAGAGTGG  
GGAGTCGGGTGGGGGCCCACTGGCT

>2469

AAGGCCGGCAAGCGAGTGCTCATTGCAGCCACGGGAACAGCCTGCGGGGCATTGTC  
AAGCACCTGGAAGGTAGGCCACCTTCAGGAGCCTGGGCAGGGTGGGTGGGCAGCAGC  
CAGCTGGCTTCTCATCTCAGCAAAGT

>2470

AGAATGGGCGGCTTCTGGGCCAGATGGAGGAAGAGGGCATCCTCAGGCGGCTGAAGA  
AGTATGACAACCTGGTAAGCTCGGCCCCCGCTGCCTGTCCCAGCACCTGCAGGCAGGG  
CTCCCCTGCGTCTCCTGGGAGTTGG

>2471

CTCGTTCGCTGGATGTCAGAGGAGGATTTTGAGAAAAGCGTTCAATGCCAGGTTCCAG  
GGTGCATGAAAGGTGAGCGGAACATTGATTTGATTGGGTAAAACAGCAGAGAGCCTTT  
TCTTATTACATCTATCCTAATGG

>2472

CTGGAAGCACTGGGCGATGGGGAGTTTGTCAAATGCCTCCATTCTGTGGGGTGCCCTC  
TGCCTTTACAAAGTAAGTGATTATTTCAGAATCAAAGTCAAATAAAAAAGAAAGC



TGAACGCAAACCCAGTGAGTGCC

>2473

GAAGTGCTTTGCTCTCAGGAATGCCAGCCGGCTGGCCAAGGAGGAAGGGTGGCTGGC  
AGAGCACATGCTGGTGAAGTGCAGGAAGCCCTGATGTGCAGATGAGAGGCCTGGGGG  
GTGGCAGAAACAAACAGCATTACAGT

>2474

CCCAGCCTCCCCGGGTGGAAGGTTGAGTGCCTCGGGGATGACATTGCCTGGATGAAGT  
TTGACGCACAAGGTGACTCTTTTAGACCCAACCTTGGTAACGATTGGACTCAAGCGA  
ATCGTTGGCCTTCGAAACATGTCA

>2475

ATTGATGAGCCGCTAGCTTCAGGCGTCACCATCACGTCCTGGAAGAATAAGGAGTGGA  
GCTCAGAGGATGGTGTGTCCTGCCAGAGCCTGTGTGTGCCGGGCTGCAGGGACTG  
CCTGTTTTGAGCCAGGCACTCACGA

>2476

GATGCTGCCTGGGAGTCTCCGGAAGGTGTTCCATTGAAGGCATTATCTTTGGAGGCC  
GTAGACCTGCTGGTGAAGTCTCCTTCATTTAGGCTGGGAACATGGGTGTGCTGGGTA  
CCGAAGGCATCTGTGAAATCTCTC

>2477

AGCTGGCAACATGGAGTCTTTGTGGGGCGGCCATGAGATCAGAGGCCACAGCGGCT  
GCAGAACATAAAGGTAAATCAAAGTCTGATCTGAAACCACAGAGAAGTGGGATTAG  
AGCACTTTCGTCACTCTTATGTCTC

>2478

AAAATCAACTCGCTTGCCACCTGCGCGCCGCGCCCTGCAACGACCTGCACGCCACCA  
AGCTGGCGCCCGGTGAGAGCACCCCGCTCCGGCCGGGGATGCGGGGCGGCGGCGG  
GATCTCCTGGGTGGGGAGCTGGCGG

>2479

GGGCCCGCTACTGGGCAGCGGCGGCTTCGGCTCGGTCTACTCAGGCATCCGCGTCTCC  
GACAACTTGCCGTGAGTGGGCGCCCGCGGTGGGGAGGGCGCGCCGGGCGGGGGG  
CGCACGGGCGTGCTTTAGCCCGGACG

>2480

GGCGAGCTCAAGCTCATCGACTTCGGGTGCGGGGCGCTGCTCAAGGACACCGTCTAC  
ACGGACTTCGATGGTGAAGCCAGGCCGGGAGGGAGCTGCCAGGTGACTCGGCCCGG  
CCCGGCCAGTCCGGAGGCCTCGGCC

>2481

GATATTCCTTCGAGCATGACGAAGAGATCATCAGGGGCCAGGTTTTCTTCAGGCAGA  
GGGTCTCTTCAGGTAAGTATGAAACCCCTGGCCATGGGGTTATTGGTCTTAATGGGG  
CTATTAGTCTTCATGGGACAGTC

>2482

TCAACTGCTCGGGCCGCGGGTGCAGGACGCTCGGTCCCGCGCTGCGCATCCCCGCGG  
ACGCCACAGCGCTGTGAGTAGCGGGCCAGCGGCACCCGGGAGAGGCCGCGGGACG  
GGCGGGCGTGGGCGGGTTCCCTGGCCC

>2483

ACGTCTCCACAACCTGCTCCGGGCGCTGGACGTTGGGCTCCTGGCGAACCTCTCGGC  
GCTGGCAGAGCTGTGAGTGTCCCCAGTCGTGCCAGCATGCGGGGCTCACTCCGGGT  
GGGCTGGCGGCACCGCCTCTTGCTG

>2484

ATATAAGCAACAACAAGATTTCTACGTTAGAAGAAGGAATATTTGCTAATTTATTTAATT  
TAAGTGAAATGTAAGTTGTGGTCTTTGGGTGGGGTCTTGCTGGACCCCAGGCCCCC  
AATATCCCTTCTGCCCTCCCAG

>2485

ACGTGTGCTGGGCCTGGCTCCCTGGCTGGCCAGCCTCTGCTTGGCATCCCCTTGCTGG  
ACAGTGGCTGTGGTGAGTGCCGGTGGGTGGGGCCAGCTCTGTCCTTCCCAGCCAGGT  
GGGACCTGGGCCCTGCAGACACTGG

>2486

CAGAACCGCGGTGGTTCAGGCCTGGAGGCCGCCTACAGCATCGTGGCCCTGGGCGAG  
GAGCCGGCCCCGAGGTGAGTGTCTGCTGCCACTCCCCTTCTCCCCAGGGCCATCCAG  
ATGGGGCAGAGCCTGGTACCCCCGT

>2487

GGGCCGGGGCCGCCCTGGCAATGGTGGACAGTCCCGCCGTGCAGCGCTTCTGGTCTC  
CCGGGTACCAAGTGCCTGCCCCACCCCCGAGGGGCCATAGGTTGGGAGATCTCTG  
AAGCACTGGGGCAGAGACTGCGGC

>2488

CCCACCGGGTGGTGTAAACCCGACCTGTGCTCAGCGCCGCACAGCTACGTCTGCGAGC  
TGCAGCCCGGAGGTGTGCGGGGGGCCAGGCAGGGCCCTGAGACGCTGGCTGTGGTTA  
GGGGCCTGCCGAGCGCCCGCGGTGG

>2489

GGACCTGCAGGGACCCCTGACGCCTCTGGCACAGCAGGACGGCCTCTCAGCCCCGCA  
CGAGCCCGTGGAGGTAGTCGGCCCCCACGTTCTACAACCTGCCCTCTGCCTGCCCC  
TGGAGGCCTTGCCTGCCCTGCCAC

>2490

TTTGGGACCCAGGAGCTCCGGCGGCCCGCCAGCTGCGGCTGCAGGTGTACCGGCTC  
CTCAGCACAGCAGGTGGGACTCTGGGTGGTGGGTGGTGGTGGGGCGCCGAGGA  
CTCGGGGTGGCCTCTCTGAGCTTTCA

>2491

GCCCTGGAGCCAACATCTGCTTGCCGCTGGACGCCTCCTGCCACCCCAGGCCTGCGC  
CAATGGCTGCACGTCAGGGCCAGGGCTACCCGGGGCCCCCTATGCGCTATGGAGAGAG  
TTCCTTCTCCGTTCCCGCGGGG

>2492

GGAGGAGCCCATCTGTGGCCTCCGCGCCACGCCAGCCCCGAGGCCCGTGTACTGCA  
GGGAGTCTAGTGGTGAGTATGGCCGAGGCTCCACCACAGCCCCAGGCAGGTGCC  
TGCAGACAGGGTGCTCACACAGGGCG

>2493

GCAGTCCCTGACCTTCCAGAACGTGGTCTTCAATGTCATTTATCAGAGCGCGGCGGTCT  
TCAAGCTCTCAGTAGGTGGGCGGGGGTGGGGAGGGGAGGGGATGGGGCGGGCAGG  
GCGGGGGCGGGCTCCACCTTACCT

>2494

TGTCCCCAATGCCACGCTAGCACTGACGGCGGGCGTGCTGGTGGACTCGGCCGTGGA  
GGTGGCCTTCTGTGAGTACTCGGGGGCCGGTTTGGGGTGGGCACCAGGCTCTTGTC  
CCAGCCCCAGCCTCAGCCGAGGGA

>2495

CCGGTCCAGACCCCTCGGTGGCCAGGTGCTGGTGGAGCACAATGTCATGCACACCT  
ACGCTGCCCCAGGTGAGGGATGAGGGGGTGGGGGGCCACTGCCTTTCAGGCTCTGA

GCACGGGTCCCCCAGCTCCCCAGT

>2496

GCAGCAGGTGCTGTGAGCGTGCAGCGCTCCCTGCCCTCCGTGGCTGTGGGTGTGAGT  
GACGGCGTCTGGTGGCCGGCCGGCCCGTACCTTCTACCCGCACCCGCTGCCCTCGC  
CTGGGGGTGTTCTTTACACGTGGG

>2497

TCTGGGGGACGGTGGGTGGCTCGAGGGTCCGGAGGTACCCACGCTTACAACAGCAC  
AGGTGACTTACCCTTAGGTGGCCGGCTGGAATGAGGTGAGCCGAGCGAGGCCTGG  
CTCAATGTGACGGTGAAGCGGCGCGT

>2498

GGCGCCCGGGCAGCTGGTCCATTTTCAGATCCTGCTGGCTGCCGGCTCAGCTGTCACC  
TTCCGCTGCAGGTGGCGGGGCCAACCCCGAGGTGCTCCCGGGCCCGTTTCTCCC  
ACAGCTTCCCCCGCTCGGAGACC

>2499

CGACCCCAACTGGAGGACGGCGACCAGACGCCGCTCAGTTTCCACTGGGCCTGTGT  
GGCTTCGACACAGGTGAGTGCCTGGCAGGGCCGTCCTCCATGCCCTCACCCGTCCAC  
ACCCATGAGCCAGAGAACACCCAG

>2500

TGGCGTGGAGTACACCTTACGCTGACCGTGTGGAAGGCCGGCCGCAAGGAGGAGGC  
CACCAACCAGACGGTGGGTGCCGCCGCCCTCGGCCACTTGCCTTGGACAGCCAG  
CCTCCCTGGTCATCTACTGTTTTCCG

>2501

AGTGAGCCGCAGCTCCTACGTGTACTTGGAGGGCCGCTGCCTCAATTGCAGCAGCGGC  
TCCAAGCGAGGGGTGAGTGTGAGCGGGGTGTGGGCGGGCTGGGGATGGGTCCCATG  
GCCGAGGGGACGGGGCCTGCAGGCA

>2502

GGCTCTTGCCGCTCTTCCCACTGGGCGCTGTGCACGCCCTACCACCAAGGTGCACT  
TCGAATGCACGGGTGAGTGCAGGCTCGTGGGGGGAGCAGCGGGATCCCCGACTC  
TGTGACGTACGGAGCCCTCCCGTG

>2503

GCTGCTGCGGCAGGCCGATCCCCAGCACGTGATCGAGTACTCGTTGGCCCTGGTCACC  
GTGCTGAACGAGGTGAGTGCAGCCTGGGAGGGGACGTACATCTGCTGCATGCGTGC  
TTGGGACCAAGACCTGTACCCCTGC

>2504

TCTGGTGTCCCTGAGGGTCCACACTGTGGATGACATCCAGCAGATCGCTGCTGCGCTG  
GCCAGTGCATGGTAGGATGGCCCCACCTGCTACCCTGCCCGCATGCCTGCCAGGG  
CACTGGGTTCAGCCCCCAGGGCA

>2505

CTGCAGGCAGAGACCACCGGGGACCGTGACGCCACCGCCATCGGAGACAGCATC  
CTCAACATCACAGGTGCCGCGGCCCGTCCCCATGCCACCCGCCCGCCCCGTGCGGCC  
CTTTCCTCTGCCTCCCTCCTCCCC

>2506

GTGGTACCCTGGACAGCAGCAACCCTGCGGCCGGGCTGCATCTGCAGCTCAACTATA  
CGCTGCTGGACGGTGCCTGAGCGGGTGGGGCACACGCGGCCCCCTGGCCTTGTCTT  
GGGGGAAGGCGTTTCTCGTAGGG

>2507

GCAGGAGGATCCGCCAGAGTCACTCCAGGGTGCTGACCACCGGCCCTACACCTTCTT  
CATTTCGCCGGGTGAGCTCTGCGGGCCAGCCTGGCAGGGCAGGGCAGGGCATCATG  
GGTCAGCATTGCCTGGGTTACTGGC

>2508

CACCCGCCACCTACCGCCTTCGGCGCCAGCCTCTTCGTGCCCCAAGCCATGTCCGC  
TTTGTGTTTCTGTGAGTGACCCTGTGCTCCTGGGAGCCTCTGCAGAGTCGAGGAGGG  
CCTGGGTGGGCTCGGCTCTATCCT

>2509

CCTTTCTGTGGCAGCGGGCCGCTTCAAGTACGAGATCCTCGTCAAGACAGGCTGGG  
GCCGGGGCTCAGGTGAGGGGCGCAGCGGGGTGGCAGGGCCTCCCCTGCTCTACTGG  
CTGTGCTGGTTGCACCCTCTGGGAG

>2510

ATCTTCCGGATCGCCACCCCGCACAGCCTGGGTAGCGTGTGGAAGATCCGAGTGTGGC  
ACGACAACAAAGGTTTGTGCGGACCCTGCCAAGCTCTGCCCTCTGCCCCGCATTGG  
GGCGCCCTGCGAGCCTGACCTCCC

>2511

GTCAATGACTGGCTTTCGGTGGAGACGGAGGCCAACGGGGGCCTGGTGGAGAAGGAG  
GTGCTGGCCGCGAGTAAGGCCTGTTCCATGGTCCCACTCCGTGGGAGGTTGGGCAGG  
GTGGTCTGCCCCGTGGCCTCCTGC

>2512

TTCTCCTCATCTGCCTTCTCCTGGGCGCCAACGCCGTGTGGTACGGGGCTGTTGGCGAC  
TCTGCCTACAGGTGGGTGCCGTAGGGGTGGGGCAGCCTTCTCCTGCCAGCCCTTCC  
TGCCCTCAGCCTCACCTGTGTG

>2513

GGTGTCCAGCGTGGTTGTCTATCCCGTCTACCTGGCCATCCTTTTTCTTCCGGATGTC  
CCGGAGCAAGGTGGGCTGGGGCTGGGGACCCGGGAGTACTGGGAATGGAGCCTGGGC  
CTCGGCACCATGCCTAGGGCCGC

>2514

CATCGACAGCTGCCTGGACTCGTCCGTGCTGGACAGCTCCTTCTCACGTTCTCAGGC  
CTCCACGCTGAGGTGAGGACTCTACTGGGGGTCTGGGCTGGGCTGGGGGTCTGCC  
GCCTTGCGCAGCTTGGACTCAAGA

>2515

CTGGGCCAGAGGAGGACGGCTTCTCCCTGGCCAGCCCCTACTCGCCTGCCAAATCCT  
TCTCAGCATCAGGTGAGCTGGGGTGAGAGGAGGGGGCTCTGAAGCTCACCTTGCAG  
CTGGGCCACCCTATGCCTCCTGTA

>2516

TTGCCGAGGGGGTCAGCAGCCCAGCCCCTACCCAAGACACCCACATGGAAACGGACC  
TGCTCAGCAGCCTGTGAGTGTCCGGCTCTCGGGGAGGGGGGATTGCCAGAGGAGGG  
GCCGGGACTCAGGCCAGGCAGCCGTG

>2517

GGGGAGCTGGGGCCACCCAGCCCAGGCCTGAACTGGGAACAGCCCCAGGCAGCGAG  
GCTGTCCAGGACAGGTGTGCTTTCGTAGCCCCGGGATGCCCTAGCCCCTCCTGTGA  
GCTGCCTCTCACAGGTCTGTCTCTGC

>2518

GAGTGTTCGTGGCTCCTGTCCAGCAGCGCCAGCTTCTGGCCTCATTCTCGGCTGG  
GAGCCACTGAAGGTGAGGGGGCTGCCAGGGGTAGGCTACAGGCCTCCATCACGGGGG

ACCCCTCTGAAGCCACCCCCTCCCC

>2519

CCACGGCTTTGCACTCTTCCTGGCCAAGGAAGAAGCCCGCAAGGTCAAGAGGCTACA  
TGGCATGCTGCGGGTGAGCCTGGGTGCGGCCTGTGCCCTGCCACCTCCGTCTCTTGT  
CTCCACCTCCACCCATGCACGCA

>2520

GGCACGCCTACCGTCTGCAAAGCGCCATCAAGCAGGAGCTGCACAGCCGGGCCTTCC  
TGGCCATCACGCGGTACGGGCATCCGGTGCCTGTCTTCTGGGCTTTAGTTTTG  
CCTTTAGTCCAGCCAGACCCTAGG

>2521

TACGTCCACGGGAACCAGTCCAGCCCAGAGCTGGGGCCCCCACGGCTGCGGCAGGTG  
CGGCTGCAGGAAGGTGAGCTGGCAGGGCGTGCCCAAGACTTAAATCGTTCCTCTTGT  
TGAGAGAGCAGCCTTTAGCGGAGCT

>2522

ACGACGTTGGCTGGGAGAGTCTCACAAATGGCTCGGGGACGTGGGCCTATTCAGCGCC  
GGATCTGCTGGGGTGAGCAGAGCGAGGGCCCCGGGCGTCTACGCCAAGGACAAGGGA  
GTAGTTCTCCAGGAGTGCCGCGGCC

>2523

TGGGCCTGAGCCTGGAGGAGAGCCGCGACCGGCTGCGCTTCTGCAGCTGCACAACT  
GGCTGGACAACAGGTGGGAGCTCCCTCCCCTGCCCTCTCCGGGGTGGCCGAGTCAC  
CAGCCAGGAGCCCACCCTCACTCCTC

>2524

CGCCCTCAGCGTCCGCCCTTTGCGCTGCGCCGCTCAGCGCGGCCTCTCGCTGCCT  
CTGCTCACTCGGTACGCCCTCCCCGGCCAGACCCCGCGCCTCCACCGGCAGCGTC  
CCGCCCCCTCGCGGGGCCCGCCC

>2525

CCAGGTGGCGCAGCTGAGCTCCGCAGCCCGTGGCCTGGCGGCCTCGCTGCTCTTCCTG  
CTTTTGGTCAAGGTGAGGGCTGGGCCGCTGGGCGCGGGGCTGGGCGCACACCCAGG  
GCTGCAAGCAGACAGATTTCTCGTC

>2526

GCCAGAGCTCCTGGGGGTACCTTGGGCCTGGTGGTGCTCGGGGTAGCCTACGCCAG  
CTGGCCATCCTGGTAGGTGACTGCGCGGCCGGGGAGGGCGTCTTAGCTCAGCTCAGCT  
CAGCTGTACGCCCTCACTGGTGTC

>2527

GGACTACGAGATGGTGGAGTTGTTCTGCGCAGGCTGCGCCTCTGGATGGGCCTCAGC  
AAGGTCAAGGAGGTGGGTACGGCCAGTGGGGGGGAGAGGGACACGCCCTGGGCTC  
TGCCAGGGTGCAGCCGGACTGACTG

>2528

GATCCCAAGGCCCAACTCCCCGAACCACTCAGGGTCTGTGGACAGCTCACCTAGTGG  
CAATGGCTGCAGGTAAGCGCCCTAAAATCCCTTTGGCACAACGTGTCCTGAGGGGAG  
AGGCAGCGCCCTGTAGATGGGACG

>2529

GCTTTTTGACCACGCTATGCTCCAAGCCCATCGCGCGCACCAGCTGGCCATTGACACCT  
ACCAGGAGTTTGTAAATTCTTGGGAATGGGTGCGGGTCAGGGGTGGCAAGAAGGGG  
TGACTTTCCCCACTGGAAGTAAT

>2530

CCAGACCTCCTTCTGCTTCTCAGACTCTATTCCGACACCCTCCAACATGGAGGAAACG  
CAACAGAAATCCGTGAGTGGATTCCGTCTCCCTAGGCGGGGATGGGGGAGACCTGTGG  
TCAGGGCTCCCGGGCAGCACAGCC

>2531

TGACACCTCGGACAGCGATGACTATCACCTCCTAAAGGACCTAGAGGAAGGCATCCAA  
ACGCTGATGGGGGTGAGGGTGGCGCCAGGGGTCCGCAATCCTGGAACCCCACTGGCT  
TAGAGGGCTGGGGGAGAGAAACT

>2532

GGGGACCTGTGCAACCCGAACGGCGTGGGGCCGTGGAAGCTGCGCTGCTTGGCGCAG  
ACCTTCGCCACCGGTGAGCGGGGAACTGAGGCACGAGGGACAAGAGGTCGTGG  
GGAGTGAAGCAGGCGCAGGAAATAA

>2533

TGCAGGAGGAGCCGGGGCCTTCAACTGGAGCATGTACAGCCAACATGCCTGCCTCAT  
TGAGGGCAAGGGTAAGGACTGGGGGTGAGGGTTGGGAGGAGGCTTCCCATAGAGT  
GGCTGGTTGGGGCAACAGAGGCTG

>2534

CGTGGCCCTGGTCTGTGGTGTCCCGGCCATGGACATCCCCAGACCAAGCAGGACCTG  
GAGCTCCCAAAGTTTGTAGGCTGGGGGAGCGGGCACTTTACTGTGGGAGGCCTGGGG  
CGGGTGGGAGCTGCGGGCAGGCGGG

>2535

CTCTGAGGGTCCACATCACCTACTGTTGCCACCCCCGAGGACAACCTGGAGATCGT  
TCTGCACAGATGGTGGGTTTCTCATCATTGAGACGGGCTGGGCGGGGGCTCAGTCTCC  
CCCCTCAGGGGTCCAGGACTGGGT

>2536

AACAACAGCTGTGTTGAGAAGAAGTCTTGGAGAGAAGACTGAGAATCCAAAGAA  
GTTCAAGATCAACTGTGAGTGTCCCCAGGCCCAAGGGCTGGCTCAGTGCTGGCATGC  
TAGCCACGCTCTCCAGAGGCGGCTC

>2537

GACAATTTCTGTTTCTCTGCTACAGGACACCACCACCCCATCCAGAGCATGATGTG  
CCAGTACCTGGGTGGGTCTCACAGCACATGAGCTAACGTGGGTGAGAGGCAGCAGC  
TACGTCCATGGCTGGGAACCCTGG

>2538

GGATTATCAGGGCTTTTCCAGGCCCTGCCAGGCACCTATGGTACTTGCTGGACTTGAA  
ACAGATGGAAGGTGAGCTCTGCTAGGACACGCCAGCCTCAGCTGGAGGAGAAGCT  
GCCTTTTCTTAGCCCGAGCCCC

>2539

CCACACCAGAGCAGATGGCCCAGTATGCAGCTGATCTCCGTAGATACATCAACATGCTG  
ACCAGGCCTAGGTGTGTGCCACAGTTGGGGAGAGAGATCCAGCCCCTGGGACCCTG  
GGCCCACTCCACATTCCTGGCCAC

>2540

ATGGGAAAAGACACAAAGAGGACACGCTGGCCTTCTCGGAGTGGGGTCCCCGCATG  
CTGCTGTCCCCAGGTGAGTTTACTCCCTGCCCTGTCTGTCCAGGCTCCCTGGGGCTG  
AAATGGGGTGGTGGGACTGAATCA

>2541

ATGTGGCAGCTACAAGCCTCCTGCTGTTCTGTGGCCACCTGGGGAATTTCCGGCACAC  
CAGCTCCTTTGGTAAGGCCACCCACCCCTACCCCGGGACCCTTGTGGCCTCTACAA

GGCCCTGGTGGCATCTGCCAGGC

>2542

GCGGGAGTGCATAGAGGAGATCTGTGACTTCGAGGAGGCCAAGGAAATTTCCAAAT  
GTGGATGACACAGTAAGGCCACCATGGGTCCAGAGGATGAGGCTCAGGGGCGAGCTG  
GTAACCAGCAGGGGCCTCGAGGAGC

>2543

TGCATCGACGGCATCGGCAGCTTCAGCTGCGACTGCCGCAGCGGCTGGGAGGGCCGC  
TTCTGCCAGCGGGTGAGGGGGAGAGGTGGATGCTGGCGGGCGGCGGGGCGGGGCT  
GGGGCCGGTTGGGGGCGCGGCACCAG

>2544

GGCTGGCGGGCTGTAGCTGTGCGCCTGGCTACAAGCTGGGGGACGACCTCCTGCAG  
TGTCACCCCGCAGGTGAGAAGCCCCAATACATCGCCCAGGAATCACGCTGGGTGCGG  
GGTGGGCAGGCCCTGACGGGCGCG

>2545

CCAAGAAGACCAAGTAGATCCGCGGCTCATTGATGGGAAGATGACCAGGCGGGGAGA  
CAGCCCCTGGCAGGTGGGAGGCGAGGCAGCACCGGCTCGTCACGTGCTGGGTCCGGG  
ATCACTGAGTCCATCCTGGCAGCTAT

>2546

ATCCACCCCTCCTGGGTGCTGACAGCGGCCACTGCATGGATGAGTCCAAGAAGCTCC  
TTGTCAGGCTTGGTATGGGCTGGAGCCAGGCAGAAGGGGGCTGCCAGAGGCTGGGT  
AGGGGGACCAGGCAGGCTGTTTCAGG

>2547

AGCAGCTTCTTGATCGTGGTGGTGTTCCTCATCGCTGGGACGCTGGTTCTAGAGGCAG  
CTGTACGGGAGGTGAGTGAACAGGTGACCTGCTGGGCTGGGTGGACTAAGGGGAG  
ACCCTCTGGACACCCTGGGCCAGGA

>2548

ACTGACTGCCCAGGAATCAAGAAGTGCTGTGAAGGCTTTGCGGGATGGCCTGTTTCG  
TTCCCCAGTGAGGTGAGCACTAGCTGGAGAACGAGGAGACCCCTGAAGACACAAAAG  
AAGGCTGAGCGGTGGGGAAGCATCC

>2549

GTTTTGCCATTGCCAGTGGGACGTCTGAGACTTTCTCCTTCAAGTACTTGGCAGATCAC  
TCTCTTAGCAGGTAGGTGCCGACACCCTGCGGGTTAAGAGGTGGGGTGGGGGCGAG  
TGCTTGCCAAGGCCCTAAACTGGG

>2550

ACCTGGGTTGCTCGCCTTCTAGGCGCTGACACCGCTCGGTTGGATGTCGCGTCGGA  
GTTTCGAAAGAAGTGAGTCCGGGACGCGCCTCCCCCTTGCTGGTACCTGGCAGGCAA  
GGGGAAGTACCGTTGGTCCCGAA

>2551

AGGCCGGGCTGCCAGACCCTATTTCGGCCCCAGGACATGAAGGGTGCCTCTCGAAG  
CCCCGAAGACAGGTAACCTACGCCCTGTGCTGTCCAGGGACGGGAGGGAAAGGAAGTG  
TGCGGGAGGAGTTCTGTCTCCAC

>2552

TTGCAGCCCAGAAGACCCACCAGGACCAGTACAGCTTCAGCACTGACACGGTGGAGT  
GCCGCTTCTACAGGTGAGAGCTGGGGCTAGGGGTGGGGGGCTGGAAAAGGCGCGGG  
AAACTCTGGGTGGTCTAAGAGCCCTGG

>2553

TGCAAGATGCTTCTGATTCTGCTGTCAGTGGCCCTGCTGGCCTTCAGCTCAGCTCAGGA  
TTTAAATGAAGGTAAGATGAATTGGGGGAAGATATTGTGACTCTGATTGGGGTTTACAG  
GCAAATGCTATAGAGGAGGAAA

>2554

TCCCCAAGGGGGCCGCCACAAGGACCTCCACAGGGGCAGTCTCCTCAGTAATCTAG  
GATTCAATGACAGGTACGATTCCAGTTTATTATCCATCAAAGGCTCCAAGTCTACAGT  
TCTCCAATTTCATTGTGCCAATGA

>2555

TGCAAGATGCTTCTGATTCTGCTGTCAGTGGCCCTGCTGGCCTTCAGCTCAGCTCAGG  
ACTTAGATGAAGGTAAGCCGAATTGGGGGAAGATATTGTGACTCTGATTGGGGTTTACG  
GGCGAATGCTATAGAGGGGGAAA

>2556

TCCCCAAGGGGGCCGCCACAAGGACCTCCACAGGGGCAGTCTCCTCAGTAATCTAG  
GATTCAATGACAGGTATGATTCCAGTTTATTATCCATCAAAGGCTCCAAGTCTACAGT  
CTCCAATTTCATTGTGCCAGTGA

>2557

GCCGCGAGCGTGACCGGGTGCAGGTGGAGCGCGACGGGCTGGCGGAGGACCTGGCG  
GCGCTCAAGCAGAGGTACGGGGCAGGGCTGGGCCGCTGCCGTCGAGGCGAGGTGCG  
AAGCGGCGTCGAGGCGGCTGCTCTTGCC

>2558

CCTGGAAGTACAGCGCAAGATTGAGTCTCTGATGGATGAGATTGAGTTCCTCAAGAAG  
CTGCACGAGGAGGTAAGTGGGCCCGGTATCAGGGGCGGTTTCTGAGGTTGTGGGGTG  
GTCTCGCTGGAGCTGGCGGGTGGAG

>2559

CATCCGCGCGCAGTACGAGAGCATCGCCGGAAGAACCTGCAGGAGGCGGAGGAGTG  
GTACAAGTCCAAGGTGCAAGAGCCGGGAGGGCCTGCGAGGCGGGACGCTGGGGTGG  
TGTCGCGCGTCCCAGCCGACTAAAGCC

>2560

GCAGGAGATGAACGAGTCCCAGCCAGATCCAGAGTCTAACGTGCGAGGTGGACGG  
GCTGCGCGGCACGGTGAGTACGAAGCTGCGCGCTCGGGCCCGGGAGCGGACGATGA  
AATGTTCTGCAACTGGCCCCCTCCAC

>2561

TCAACGTCAAGATGGCCCTGGACATCGAGATCGCCACCTACCGCAAGCTGCTGGAGGG  
CGAGGAGAGCCGGTGAGGGTGGAGCTGCTGGGGCGGGGCAGGGCGGGGTCTGGGACT  
GGGCCGGGCAGGGCGGGGCCTGGGCA

>2562

GGAGCCTCCCCAGGACAGCCACAGCCGGAAGACGGTTCTGATCAAGACCATTGAGAC  
CCGGAATGGGGAGGTGAGGCAGGTCCCCTAATGCCAGGACCCACCATTTCCCATATTA  
TTTCTGAGCCCCAGCCTGGCTGTC

>2563

TATTACCGCCAGAGACAAAGAAGTCGCAGACGAAGGAGGCGGAGCTGCCAGACACG  
GAGGAGAGCCATGAGTAAGTGGGCCAGCTGAGGGTGGGCTGGGGCTGAGGCTGGG  
AGCTCTCAGGGCCCAGCCTTCTCTCAC

>2564

GCAGGGCAGTCTGCGGCGGTGTTCTGGTGCACCCCAGTGGGTCCTCACAGCTGCC  
ACTGCATCAGGAAGTGAGTAGGGGCCTGGGGTCTGGGGAGCAGGTGTCTGTGTCCA



GAGGAATAACAGCTGGGCATTTTCCC

>2565

CCCACCCAGGAGCCAGCACTGGGGACCACCTGCTACGCCTCAGGCTGGGGCAGCATT  
GAACCAGAGGAGTGTACGCCTGGGCCAGATGGTGCAGCCGGGAGCCAGATGCCTGG  
GTCTGAGGGAGGAGGGGACAGGACTC

>2566

TCACCCTCAGAAGGTGACCAAGTTCATGCTGTGTGCTGGACGCTGGACAGGGGGCAA  
AAGCACCTGCTCGGTGAGTTCATCCCTACTCCCAAGATCTTGAGGGGAAAGGTGAGTGG  
GGACCTAATTCTGGGCTGGGGTCT

>2567

ACTCCTGGATCCCACGGCCTGCCAGGCAGGCACGGGAGAGATGGTCTCAAAGGAGAC  
CTGGGCCCTCCAGGTACTGTGCTGCAGACCCACCCCTCAGCTGAGGACACAGACCCCT  
TTTCAGGAGGCCATCTGTCCAGGC

>2568

CTGCCTGGAGCCCCTGGTATCCCTGGAGAGTGTGGAGAGAAGGGGGAGCCTGGCGAG  
AGGGGCCCTCCAGGTGAGCAGGGTGGGGCAGGTGGGCAGTGGAACATGGGCACAG  
CGACCCTGAAGTCAGTTACACGGGGAT

>2569

GCTCATCTAGATGAGGAGCTCCAAGCCACACTCCACGACTTTAGACATCAAATCCTGC  
AGACAAGGGGAGGTAAGGGGACCCCTGGGCTCACGGGGTAGGAGTTTCCACAAAT  
TCCCCTCATTCTCAGCACCAGCTTC

>2570

GCCCTGCCCGCCGCTGCGATGCTCGCCCGCCCTGCTGCTGTGCGCGGTCTGGCGC  
TCAGCCATACAGGTGAGTACCTGGCGCCGCGCACCGGGGACTCCGGTTCCACGCACCC  
GGGCAGAGTTTCCGCTCTGACCTC

>2571

AGTGTGGGATTTGACCAGTATAAGTGCATTGTACCCGGACAGGATTCTATGGAGAAA  
ACTGCTCAACACGTAAGTTTGTCTTTGTTGCTCATTAGGAGTGGGGCTGGATACAG  
TTATCATTGTATAGATTTGTGTC

>2572

AAGGGATTTTGAACGTTGTGAATAACATTCCCTCCTTCGAAATGCAATTATGAGTTAT  
GTGTTGACATGTAAGTACAAGTGTCTTTCTAAGGTTTTAGCCTTCTCAAAGAAAATA  
TGCTTTATAACTGTAAGCC

>2573

AACCTCTCCTATTATACTAGAGCCCTCCTCCTGTGCCTGATGATTGCCGACTCCCTTG  
GGTGTCAAAGGTGAGTAAGAAGAATCCATTAGAGATGTATTAATAAGACGGGCTG  
CATTGCTGCCAAAAAAAAAAT

>2574

CTTCACGCATCAGTTTTTCAAGACAGATCATAAGCGAGGGCCAGCTTTCACCAACGGG  
CTGGGCCATGGGGTAAGATAGAGTTAATATCTTAGAGTTAGTAAAATTATACCAAATCAT  
AGTCAAGGGCTAACATTAAAGG

>2575

TATTTACGGTGAAACTCTGGCTAGACAGCGTAAACTGCGCCTTTTCAAGGATGAAAAA  
ATGAAATATCAGGTATGCTTCCTTTGACTATTAAGACTTAGTTATTACCGCTTATACCCAT  
ATTTTAAAATCCCTAAAAATG

>2576

GTGCTTAAACAGGAGCATCCTGAATGGGGTGATGAGCAGTTGTTCCAGACAAGCAGGC  
TAATACTGATAGGTAAACAAGAAAATGATTTATATAAAACCCTCTTCCCCAGGGAAAAT  
TAGTGTGCTATCTTTGTTATGTT

>2577

CAACTCTATATTGCTGGAACATGGAATTACCCAGTTTGTGAATCATTACCAGGCAAA  
TTGCTGGCAGGGTAAGCATTATTATTGAAAACCAAAACAAAAGACTAGTCAGTAACTTT  
AGAATTTCTGCCACGGAAATTA

>2578

TACCAGTCTTTTAAATGAGTACCGCAAACGCTTTATGCTGAAGCCCTATGAATCATTGAA  
GAACTTACAGGTAAGAAACAGTTTCTAAACTCTTCGTTTTTTGTTTGTGTTGTTT  
TGTTGTTTTTGGTTTTCTTT

>2579

AGGCGATTATGCAGCCCCTTGATCATAAGAATCTGGATATGGATGTGCCATACTTGCAG  
ATGTGGTGAGGTGGGTGGCACTGTATCTTGCCTATGTGGATTGTAAACAAGAATTGA  
TTTGAATACTTTGATTGTTGT

>2580

AGACGATCTGCACTTCGCATTTTGGCATTGACATTTAATTTAGGGTCCTTATATAGAA  
GGGAGAGTAGGTAAACTGATTTTTTTTTTAACAGGGAGGGTTGACAATCTTTGGCAG  
ACTTGGAGCAAAAGATTGAGG

>2581

GTTGGAGAAATTTACAGTACATCATCCAAAAGAGGAGTCCATGATGGAGGCAGAGGT  
AAACTTGGAGAGGTAAGAAACCCTGAAGACAGGGGAGTGCTTTGTGGCAGGCTCTGC  
ATATAAGAATTCAGCCTGGCCAACA

>2582

GCGCATGCTCTGGGGCAGTTCGCGGCCCGCGGGGAGCGCCGAGTTCCTTGTGGCC  
GACGTGCACCAAGGTAGGTCTCGCCTGGGACGCGCGGAGGGTCCGGGCAGAGGGCG  
GTAACGAGCGGGCCACAGCGGAGCACG

>2583

TCACCCAAGCGCATAGCTAAAAGAAGGTCCCCCAGCAGATGCCATCCCCAAAAGCA  
AGAAGGTGAAGGGTAAGTTGGCCTTGGCCTCTTTGTGGGTACAGGTGGCCCCTGAAA  
CCCTAAGAACCCGGACTGGGCTCC

>2584

CATTCCGGAGGATGTTGTGCAGGCTGAGGCTGGGGCATGCACACCGTGTGCTAAGC  
AAAAGTGGCCAGGTAGGTGTTGGGGACTGGCACAGGGTTGGACAAGGCCTGGGGTTG  
GGTGGCTTGGGGCAGGGCTTTTGAA

>2585

GTCAGCAGGAGACAGTCACACAGCAGCCCTACCGATGATGGCCGTGTCTTCCTCTGG  
GGCTCCTCCGGGTAAGGCTGGGTCTGAAAGTCTGCATGGTCCCGTAAAAGACAGAAT  
TAATTGCGGGGCCCAAGATAAT

>2586

GAGCCCATGAAGAAGAGCATGGTGCCTGTGCAGGTGCAGCTGGATGTGCCTGTGGTAA  
AGGTGGCCTCAGGTGGGTCTGGGGCACTTGCTCAGGGCAGGAGTTGGAGGACCTTG  
TTCTGGGGCTGGCCTAGCCTTGGGC

>2587

TGCGGGGAACAGGGCCAGCTAGGCCGTGTGCCTGAGTTATTTGCCAACCGTGGTGGCC  
GGCAAGGCCTCGGTAAGTGGCCTTGGTACCTCCAGCAGGGCAAATTGGCAGGCCACC

CCCACAGTGAAGGCCAAACGGAGGA

>2588

TATTTACCTTTGCCATCTCCCATGAGGGCCACGTGTACGGCTTCGGCCTCTCCAACTA  
CCATCAGCTTGGTGAGCCCCGAGCCCAGCTTCAGGCATGACCCAGTGGCCTGCGTTCC  
TGTCTGGCTCTGCACTCATTCA

>2589

AAGAATTCACCAAGTCCTGGGTGGGCTTCTCTGGTGGCCAGCACCATACAGTCTGCA  
TGGATTCCGGAAGGTAGGGCCTTTACGTCTTCTCTAGTTTGGGGGTGGAGTGTCCCTG  
GCCTAGGCCTAGCCAGATTCTCTG

>2590

ATCTCCAGGCTGCCTGCTGTCTCCTCGGTGGCTTGTGGGGCCTCTGTGGGGTATGCTGT  
GACCAAGGATGGTGAGTGGGGCTGCCTACACTCTGTCTAGTTGGGACCTGGGGGTCAT  
GGTTCTTACCCAATTCCCAATA

>2591

CCGCGGTGCCATGGCCCCCGCCGTCTGTTCCGCGCTGCTGCTGTTCTTCGTAGGCGGA  
GTCGCCGAGTCGGTGGGTGCTTGGAGGTTCCCGGGCTGGGGGCGAAGCGGGGGCGCA  
GGCCGGTGCCTCCTTTGTTCTGTCGG

>2592

GACGATGAGGATGTAGTGGGGCCCCGGGCAGGAATCTGATGACTTTGAGCTGTCTGGCT  
CTGGAGATCTGGGTACGGAAGGTGTGCTGGGCAGGCGTAGGCACAAAGCTGGAGGGA  
GTGGTGGCTTACCAGCCAGGAGGG

>2593

TCCAACAAGGTGTCAATGTCCAGCACTGTGCAGGGCAGCAACATCTTTGAGAGAACG  
GAGGTCCTGGCAGGTAAGTCCCATGCTGCTTATAAGATGCCTTGAAGGTGGAATGGGG  
CTCAGCGGGGGAGAGCACCTGCAGG

>2594

AGGCACCAATGCCTATCGCTCCTACTGCTACTACTTTAATGAAGACCGCGAGACCTGGG  
TTGATGCAGATGTGAGTGAGGAGAGCAGTGTGGGAAGGGAGACTCATGAAGGGAGGG  
GAAGCTGCCACTCTCCAGTGTGTT

>2595

GGCCTACTGATTAAGGAGAGTGGCACTGATGACTTCAATGTCTGGATTGCCCTCCATG  
ACCCCAAAAAGGTAGGCTGCAGCCTTCTTTATCTCCTAATGATCAGGTTTGAGAAGTAA  
GAAGGAGGTTCAAGTTCTGGTC

>2596

AAGTCCTGGGGCATTGGAGCCCCAAGCAGTGTTAATCCTGGCTACTGTGTGAGCCTGA  
CCTCAAGCACAGGTGAGAGGCAGAGAATCCATCCACCTGTTTCTGTTCTCTCCTGCTTA  
GCTCCAGGGATGGAAGTGGGACT

>2597

CTAAGCATGGCTCAGACCAACTCGTTCTTCATGCTGATCTCCTCCCTGATGTTCTGTCT  
CTGAGCCAAGGTGAGATTTTCCCCACACTTCCACAACCCCAACTCTGAATTCTTCCC  
TCCATCCTCATGTATAAGGTT

>2598

AGGCACCAATGCCTATCGCTCCTACTGCTACTACTTTAATGAAGACCCTGAGACCTGGG  
TTGATGCAGATGTGAGTGAGGAGAGCAGCAGGGGAAGGGAGGCTTATGAAGGTAGAG  
GCAGCTGCTAATTTGCAGTGTGTT

>2599

GGCCTCACTGATTAAGGAGAGTAGCACTGATGACAGCAATGTCTGGATTGGCCTCCAT  
GACCCAAAAAAGGTCAGTCTGCAGCCACCTCTATCTCCTTATAAACATTTTTGAGAGGT  
AAGAGGGACGTTTAAGGTCTGGC

>2600

AAGTCCTGGGACACTGGATCCCCGAGCAGTGCTAATGCTGGCTACTGTGCAAGCCTGA  
CTTCATGCTCAGGTGAGAGGCAGACAATCTATCCACCTGTTGCCATTTCTTCCCCTT  
ATCTCTGGGGATGAACATGGGGA

>2601

CGCCGCCGCCGCCCTCTGAGGAGGACCCAGAGCAGGACAGCGGCCCGGAGGAC  
CTGCCTCTCGTCAGGTGAGCGAGCAGAGCCGCCGTCGCCTCACGCGGGAAGGGCGCC  
CCGGGTGTGCGTAGGGCGGGCGCAAGG

>2602

GATACCAGATCATGTGAGAGAGAGAGCTTGGTAACTTGGGAGAAAGTTTCATCTGTG  
GATGGAGTATTGGTAAGGATTTTCTTAAACGTTTTGAAATTTTTTTTCTCATTTTAAA  
AACAACCTCAAATCACTATACA

>2603

TTATTGCAGCAGTTGACCTAGATGAGATGTCGTTCACTTTTACTGAGCTACAGAAAAAC  
ATAGAAATCAGGTAAAGTTTCTTGATAAATATAAGCCTCTGCCATAAAAGGAAATGAA  
TTCTGGATTTTCTCTCAATAG

>2604

TTGATAATGCTATGTCAAGACTGTTGAAGAAGTATGATGATTGTTTGCCTCTTCAGCA  
AATTGGAAAAGTAAAGTAAACATTTTATTAGGGTTACACTCTGATTTTTTATGTCATTGT  
TCACAATTAGATTCTGGGAA

>2605

CAGTTAATGCTATGTGTCCTTGACTATTTTATTAACCTCTCACCTCCCATGTTGCTCAA  
GAACCATATAGTAAGTATTTAATTTATGCCCTTTTACTTTCTCATTGAGCAGTTGCTTAT  
TGAATGTCTAGTGGGTACC

>2606

AAAACAACCTAGAAAATGATACAAGAATTATTGAAGTTCTCTGTAAAGAACATGAATGTA  
ATATAGATGAGGTAATTTAACTTCATGATTTCTTTAAACAGTTAAAGTAGATTTAGATGT  
AAGTTCTCCCTAACAATATT

>2607

TGTTTATTTCAAAAATTTTATACCTTTTATGAATTCTCTGGACTTGTAACATCTAATGGA  
CTTCCAGAGGTAATCTGAAAGGAAATTTAATAAAATATAATGTTTGGAGACTGTGGAG  
GGAGGATAATTGTCTAACTT

>2608

AAAATAAAGATCTAGATGCAAGATTATTTTTGGATCATGATAAACTCTTCAGACTGATT  
CTATAGACAGGTATTGCACATGGTATATTGATTGATTGCTTTAGATATAGGTTGATACT  
GATATAGGTAGATTATATA

>2609

CACAGAGAACCACGAAAAAGTAACCTTGATGAAGAGGTGAATGTAATTCCTCCAC  
ACACTCCAGTTAGGTATGAATTTTCTACTTTTAATTATATTATAATTTGTTATTCATGGC  
TTTATAGTGTTCAGATTTGT

>2610

CCAACAATTAATGATGATTTTAAATTCAGCAAGTGATCAACCTTCAGAAAATCTGATTT  
CCTATTTAACGTAAGCCATATATGAAACATTATTTATTGTAATATCTTGGCAAAGAACT

TGAAATTTAAAGTTAAAGTA

>2611

TATAGGATACATCTTTAAAGAGAAATTTGCTAAAGCTGTGGGACAGGGTTGTGTCGAAA  
TTGGATCACAGGTAACCTGAATTCATTGTAATTCGTGGTACTATAGAGTAATAATATTA  
AAGCAGCATCTTTCCAGTTCCG

>2612

CTGAATGACAACATTTTTTCATATGTCTTTATTGGCGTGCGCTCTTGAGGTTGTAATGGCC  
ACATATAGCAGTAAGTTAAATTTTCATAAATAAACACTTTTGTTCATTTAAAGTTAAAA  
TGTGGTGTGTTTCTTTGGTC

>2613

GACAAGAGAAATGATAAAACATTTAGAACGATGTGAACATCGAATCATGGAATCCCTT  
GCATGGCTCTCAGTAAGTAGCTAAATAATTGAAGAAATTCATTCATGTGCATATGGCTAA  
CAAATTATTGTTAGTGAGAGGT

>2614

CAACTGATCACCTGAATCTGCTTGTCTCTTAATCTTCCTCTCCAGAATAATCACACTG  
CAGCAGATATGTAAGCAAATATATGTTATGTTGACCATTCAAAGTCAAATAGATTTTA  
AGCATAAGTGCAATGTAACA

>2615

CAAGCAACCTCAGCCTTCCAGACCCAGAAGCCATTGAAATCTACCTCTTTCACTGTT  
TTATAAAAAAGGTTAGTAGATGATTATTTTCAAGAGCATGGACTCTGAAACTAGGCTGA  
CTGGGTTCAAATCATGTTTCTT

>2616

CATCTGGACCCTTTTCCAGCACACCCTGCAGAATGAGTATGAACTCATGAGAGACAGG  
CATTTGGACCAAGTAAGAAAATCAAGCACTTCACCTTCTCTCCTCCTACTTACTTGT  
AACTGATTTCTTTCTTTCTTCT

>2617

GAAGAATATAGACCTTAAATTCAAAATCATTGTAACAGCATACAAGGATCTTCCTCATG  
CTGTTCAAGGAGGTAGGTAATTTTCCATAGTAAGTTTTTTGATAAATCCATATCCATAACA  
TAACATAGGTAATTCATTTG

>2618

TATAGTATTCTATAACTCGGTCTTCATGCAGAGACTGAAAACAAATATTTTGCAGTATGC  
TTCCACCAGGGTAGGTCAAAGTATCCTTTGATTGGAAAATCTAATGTAATGGGTCCA  
CCAAAACATTAATAAATAAT

>2619

CACCCCTGAAGAGTCCATATAAAATTTTCAGAAGGTCTGCCAACACCAACAAAAATGAC  
TCCAAGATCAAGGTGTGTGTTTTCTCTTTAGGGAAGTAGTAAAGAATGAGAGGGGGAT  
TATTTTGATCCAAGAATAAAAAAT

>2620

GAAGCAACCCTCTAAACCACTGAAAAAACTACGCTTTGATATTGAAGGATCAGATGA  
AGCAGATGGAAGGTAGGAACCAGTTTTGAATGTTTTCCAGTAGCTGAGATGGTCATCT  
GGGAATCCAGAGTCTCAGCACTG

>2621

CGGTTAATGAAAAAATGGACACAGAAAGTAATAGGAGAGCAAATCTTGCTCTCCACA  
GGAGCCTTCCAGGTAGGTACAAGGTATTATTTTTTCTACCCTCAGTCACTTGTGGCAG  
GGGAAGTCATAGTCACGGTGCTT

>2622

GAAGTCGGCCTCATCCCCACCACTGCATACATGGCTGACAGTTTTGAAAAAAGAGCAG  
GAGTTCCTGGGGGTGAGTGAGCCTCCTCCAACCTTTGACTAGAGTAAGGGTTGGGTCTA  
GAAAAGAATATTGAGTTGCATCAA

>2623

TATTTACACATTGAGGGAGACATTTTTTCATCATTTAAAGCAGGTTATCCATTCTGGGG  
AGCCATATTTGTGAGTATATATCTATAATTGTTTCTGAAATAACACTGAACATAGGTTTTT  
CTCTTCTCAGATCTAACC

>2624

GGCCTATATCCACATCCACAGTTGCCAGAAATTTTTTGAGACCAAGTGCTTTATGGCTT  
CCTTTTCCACTGTATGATTTTTTTTTTGTGTGGGAAGACTAAGATTCTGGGTCTAATGT  
AAGTAAGAAGCCCTTCTCTCC

>2625

CATTCTGGGACTTGGTAGTGCTGTGCTCACTACAATCTGTGGAGCTGGGGAAGAACTC  
AAAGGAAACAAGGTAGATAGAAGCCCGATATAAAATCTTGAATGACAGGTTAACGAAT  
TGGAGCTTATTCTTAAATATG

>2626

ACAAGGATTGGTTTGGGGTCCAGTGGGTCCAGCAGCCGTTACCTGGATCCCGGTGACCG  
GGATGTGGCTGAGTGAGTGATTTGCGTCTCCCTTCTCCTCCTCCTCCTCCTCCCTGGACAG  
GCTCCCTCCTGCTGCCTTGAATC

>2627

GCTGCTGGAGCACTTGCAGGACTTGGCAGGCACACTGGGTAGCATGCTGGCTGTCACC  
TTCCTACTGCAGGTGAGTCAGCAAAGCATCTGACACCTCCTCCCACCCGGGACTCCTC  
CCTGCCTCCAACCCTGGGCCTCTT

>2628

ACACGAACAAGCGCGTGTGCGAGGAGATCGCCATTATCCCCAGCAAAAAGCTCCGCA  
ACAAGATAGCAGGGTGAGTCGGGCCTTCTCGGCCTCCGGGCGTCCGCGATCTGTTTG  
TGTGCTCTGCCGCCCTCCGACTCGG

>2629

CCCAGTAAGAGGTATCTCCATCAAGCTGCAGGAGGAGAGAGAAAGGAGAGACAA  
TTATGTTCTGAGGTAAACTTTCTGGATATTTGGGCTTCTGGCTAATCCTCAAATGATAA  
AGCTATGGGTTCTTGGCTTCCAA

>2630

ACTTCGTACTTTCTATGAGAAGCGTATGGCCACAGAAGTTGCTGCTGACGCTCTGGGTG  
AAGAATGGAAGGTAAAAGTTGACAAATTGTTGCAGGTATTTAAGTCAGAGACGGTAAA  
CGCCATTGGTAACTGGTATTTGG

>2631

AGAAAATCAGTTCGTGGTTGCATTGTGGATGCAAATCTGAGCGTTCTCAACTGGTTAT  
TGTAATAAAAAGGTGAGGGTACTTGTGTTCAATTTTCGTTGAAATTGATTTAAAGCCAG  
TTGTCCAAATGCTTATTCATTT

>2632

AAACTTTTCAATCTCTCTAAAGAAGATGATGTCCGCCAGTATGTTGTAAGAAAGCCCTT  
AAATAAAGAAGGTAGGAGGGATTATGCAATTAGGGCTTGCTTAATTTGGTAATTTGTCT  
ATCATTTTGTGTGCATATCAG

>2633

GAAGCAGCGTACCAAGAAAAATAAAGAAGAGGCTGCAGAATATGCTAAACTTTTGGC  
CAAGAGAATGAAGGTTAGTCTAAGATGATTTGAGGGGGTGGGAGGAGTTCGACCTGG

CTTTGGATTTGCGTCTTTAACCCAGA

>2634

ACTACTTTGATACGACACCGCATGGCTTCGAGACTCACACGCTGGAGGAGCACAACT  
GGCCAATTACATGTGAGCAGACACACTGGCCAGTCAGGAGGGTGGGGGGCATGGCTG  
CCAATAGCCAGCAGTGGGGTACTTA

>2635

GTTTTCTGCTCCTTGGTCCTGGGTGTCAGCAGCCGAAGCTTCTTTTCGTTCTTGGCGA  
GGCTTTTGATGGTAAGGCTTCAGAAGGTTTGCAGGATTTCTAAGAGAAACATCGCCCT  
GGACCTATAAACTGGGGAAAATG

>2636

TCCATGCTCGGGGGAACATATGATGCTGCCAAAAGGGGACCTGGGGGTGCCTGGGCTGC  
AGAAGTGATCAGGTAACAGCTCCTGGGACGTTAGGGCTGGGTGAGCAGAGCTTGC  
CTGCCTTGGACAGTCAGGAGGGAGA

>2637

AGCCGGCTTCGCCGGGGATGACGCCCTAGGGCCGTGTTCCCGTCCATCGTGGGCCGC  
CCCCGACACCAGGTCAGGCTGCCCTCCGCAGAGGGAGCCGGCTCGGGGTCCCCGCG  
TAAGCCAGCCTGGTGCCACCCGGAG

>2638

TTCAACGTGCCCGCCATGTACGTGGCCATCCAGGCCGTGCTGTCCCTCTACGCCTCCGG  
AAGGACCACCGGTGAGTGCCCGCTGGCCCCAGTCCCTCGTCCCGCCCCGCCCCCG  
CCCCGCCCCCGGCCGCTAGCGC

>2639

GCGGGCCGCGATCTACCGACTACCTGATGAAGATCCTCACTGAGCGTGGCTACTCCT  
TCGTGACCACAGGTGCGCGGCCCTGCACCCGGGCGGAGGGCCGCGGCGGCCTGA  
GTGAGGGCTCCTCTCCTGCTTCTGC

>2640

GGGCAGGTCATCACCATCGGCAACGAGCGCTTCGCTGCCCGGAGACGCTTCCAGC  
CCTCCTTCATCGGTGAGCCCCGCTCGCCCTCGCCCCGGCCCCAGGCCCGCGCCCCC  
GGCCCGAGCTTCTGCTCACGCTCC

>2641

GTACCCTGGGATCGCTGACCGCATGCAGAAAGAGATCACCGCGCTGGCACCCAGCACC  
ATGAAGATCAAGGTGGGTGGTGGCTGCGCGGGCTGTCGGCGGGGTGGGCTCCAGGG  
TGAGGTCTCCCCACCTCACGCGCTG

>2642

AGGAATATGAACAAGCCGCTGCTTTGGATCTCTGTCCTCACCAGCCTCCTGGAAGCCTT  
TGCTCACACAGGTAAGGAGGTGAAGGAATGGTCAAGAATCATAAAGTGAGAAAATAG  
GTTGAAGCTGAGATATCTTTTCCC

>2643

CCCAACATCATCTTTGTACTTTCCCTGCTCCTCATCTTGAGAAGCAAGCAGCTGTGAT  
GGGACAAAAAGGTGAGTGGAGAGGGTAAGCCTTGGGGAAAGCTGCTCAGACAGCTA  
ATAATCTAAGATTATTTGGGGTGCA

>2644

ACGACCGAAACCCATTATTTACATAAACCTACCATTTCGGTAACCATGTGAAAGGATGGA  
CCAATATCAAGGTAATTTTTTTTTAGCAAATAGGGGAGATATCTCTCATTGTTTAGAA  
TTGTTGGGGACTCTCCAGGAC

>2645

TCCATCATCCTCTTTGTCCTTCCCTGCTCCTTATCTTGGAGAAGCAAGCAGCTGTGATG  
GGACAAAAGGTGAGTGAGAGGGTAAGCCTTGGGGAAAGCTACTTTAAAAAATGG  
CCTCTAAGGATATTCAGGGTGCA

>2646

AAGACAGAAATCCAATATCTACATAGCCCTGTTGCTTAGCAACCACTTGAAAAGCTGG  
ACCAATAGCAAGGTAAGTTTGCTTTTCTTACCAAATAGGAGAGGTGCCTGTCCCAAAG  
TTGGGGACTCTCCAGGAACATGGT

>2647

ACTCCTGGATCCCACGGCCTGCCAGGCAGGGACGGGAGAGATGGTGTCAAAGGAGAC  
CCTGGCCCTCCAGGTACTGTGCTGCAGACCCACCTCAGCTGAGGGACACAGACCCC  
TTTTCAGGAGGCCATCTGTCCAGG

>2648

CTGCCTGGAGCCCCTGGTGTCCCTGGAGAGCGTGGAGAGAAGGGGGAGGCTGGCGA  
GAGAGGCCCTCCAGGTGAGCAGGGCGGGCAGTGGGCAGTGGAACATGGGCACAG  
CGACCTGAAGTCAGTTACACAGGGGTGA

>2649

GCTCATCTAGATGAGGAGCTCCAAGCCACACTCCACGACTTCAGACATCAAATCCTGC  
AGACAAGGGGAGGTAAGGGGACCCCTGGGCCCTCACGGGGTAGGAGTTTCCACAAA  
TTCCCCTCATTCTCAGCACCACTT

>2650

GTGTGGCCCTGATGTGGGCCGCCAGACCGTGGGGCGCTTGGGCTTCCAGGTCTGGCTG  
AAGAATGGCGTGGTGTGAGTGGCACCTGGGCTAGGGCGCTGGGGGGCTGGGTGTGCCA  
CCCTGTGAGTCCTGGGCCAATCCCT

>2651

TTCTGAAGGCGGCTGAGGACTATGGGGTCATCAAGACTGACATGTTCCAGACTGTTG  
ACCTCTTTGAAGGTAGAGAGGAAGAGGCTGGGGGAGGAGGTGGGCAGGAGGACAGG  
GTGCTGGGACAGGGAGAGGGAATGAC

>2652

TGGCTTTGGGCAGCTTGGCAGTGACCAAGAATGATGGGCACTACCGTGGAGATCCCAA  
CTGGTTTATGAAGTATGTGGCCCCAGGGAGCTTGGGTCTCCGCATGGGGTGGGAGGT  
GGCTTGTCTAAGGAGCTTGCGGG

>2653

CTTTGGGTGGGGGAACCTCACCTGCCAATCTGCAAAGGTCTATTCACCGCCATCAAC  
CTCGGGCTGAAGGTGAGCACTGAAGGGGCTGCAGTGGAGGAGGCCGAAAGGAGTGC  
TGGGGCTGGGGGCTGGGGCTGATGCT

>2654

GCTGGCTCTATGAAGCGATGGCCAAGGCTTGGGAGCCCTGGCTGCCTGCCGAAGCCCT  
GCGCACCTCAGTACTTATCGTCCGTGGAAACCCAGGAAGGGAAAAGAAAGGTGAA  
TGAAAGTGAAGGGAGAAGGGAACCT

>2655

CACGGATCCCGCAGGACAGCTCCAGTGGCTGGTGGGGGAGCTTCAGGCTGCTGAGGA  
TCGAGGAGACAAAGTGAGGGCCAGTAGTGGGAACACGGTGGTGTGGGGGACAAGC  
AGGCTCCTGTTGAGCTGGAGCACCTCT

>2656

TAATTGGCCACATTCACCCAGGGCACTGTCTGAAGAGCTGGAGCTGGAATTATTACCGA  
ATTGTAGCCAGGTAGGACGGAGATGAGGGTGGGAATAGGGACAGGGTGAGTGTCTGA



AGGCTGAAAATCCCTTGAGCATC

>2657

ACTCTGAGCCGGCCGCTGGCTGTAGCCTTCTGGCACCCAGTGCAACTACCTACATCG  
GCCTTAATCCTGGTGAGTGAGGCAGAAGGGAGCCTCCCTTATCCTGGAGTTGGTGGGA  
TAGGGGAAGGAGGTTGGAGCCAGA

>2658

CCACTTCTCGATGAAGGTTTTACTGCCAAGGACATTCTGGACCAGAAAATTAATGAA  
GTTTCTTCTTCTGTAAGTATATGAGGCCCATGCTGGCAGTGACAGTGTGAGAGTGCCAGGC  
AAGTGGAACACTTTGGCAAGGTC

>2659

ATGTAATGATAGCAAAGCCATCGTGAAGACCCTTGCTGCTACCGGGACAGGATTTGACT  
GTGCTAGCAAGGTAAGCGATAGCAGCAGGCCTCAAAGCGTTGTATAAAATGGGCCTG  
GTATTCCCACGAGGCAGATACA

>2660

GAGTCCAGATGATGACTTTTGATAGTGAAGTTGAGTTGATGAAAGTTGCCAGAGCACA  
TCCCAAAGCAAAGTGAGTTATTCCCCATCTGAGGGCAAGATCGGGAGCATAAGATAT  
GTGGATTCTTATCAAACAACTTA

>2661

CCACGCTCAGAACCAGCAGGCTCCTTTTGGAACGGGCGAAAGAGCTAAATATCGATGT  
TGTTGGTGTCAAGTGAGATTTGGTGGGATAGCTAGAGGTCAAGACATTGAACAGTTT  
GAGTTTTACAGGCTTTCTCCTAGT

>2662

AAGCGGCTGTACCGATCCTGAGACCTTCGTGCAGGCAATCTCTGATGCCCGCTGTGTTT  
TTGACATGGGGTGAGTATACGTGACCCTGTTAGGGAAGGGCGGGACACAACACTGACAA  
TAACTAGTCTTAATTCTAGAGTT

>2663

CAGCATGTATCTGCTTGATATTGGCGGTGGCTTTCCTGGATCTGAGGATGTGAACTTA  
AATTTGAAGAGGTAATTTAGAACAAAACCTGTAATACTCAGTAGCCGTTCTAATAAATTC  
CTTTTTGGAATATTTCAAAT

>2664

TCAGCTTTCACGCTTGCAGTTAATATCATTGCCAAGAAAATTGTATTAAGGAACAGAC  
GGGCTCTGATGGTATGTATAAAGGACGAATCACTTCATGTATAACTGAAAGCTGATGCA  
AAAAGTCATTAAGATTGTTGAT

>2665

TGATGGCGTCTATGGATCATTTAATTGCATACTCTATGACCACGCACATGTAAAGCCCCT  
TCTGCAAAAAGGTAATTTCTGAGCATACTGTATAAAACAATTAAGAGGACTGGTCACAAC  
ACGTGTAATTAAGTAGTACTT

>2666

TTGCTGCTGCCTCTACGTTCAATGGCTTCCAGAGGCCGACGATCTACTATGTGATGTCA  
GGGCTGCGTGGTAAGTAAGCCATGCATGTTGATGGTGCTGCCAAGAATAGGCACCTT  
CTTGATGTGTGCTTCTTGCTA

>2667

GCCATGGCTGAGTCACACCTGCTGCAGTGGCTGCTGCTGCTGCTGCCACGCTCTGTG  
GCCAGGCACTGGTGAGTCTCCCCAGCCTCCCCTCCTAGGCAGCTCCACCACTCA  
CTGAGCACTGCTTTGTGCTAGGCA

>2668

CCTGGAGCAAGCATTGCAGTGCAGAGCCCTAGGGCATTGCCTACAGGAAGTCTGGGG  
ACATGTGGGAGCCGTGAGTACCACCAAGGATGCATGGCAACTGGGGGTCTGAAATGA  
AGGGTGCTGGGTGGGCTCTGGATGGG

>2669

TGACCTATGCCAAGAGTGTGAGGACATCGTCCACATCCTTAACAAGATGGCCAAGGAG  
GCCATTTTCAGGTAATGATGCCCAGATCCTGGATGAAGGTTGGGGCCAAGAGATGA  
GGGACAGAGCAGGGAAAGAGCTGAG

>2670

CATGCCCCAGTGCAACCAAGTGCTTGACGACTACTTCCCCCTGGTCATCGACTACTTCC  
AGAACCAGATTGTGAGGGCTGCAAGCTCACCTCCTGCCTGCCTCCCCACGCAGGCCCC  
TGTGCCACCCATGGGGGAGCCA

>2671

TCTGCTGGACAAGCTCGTCTCCCTGTGCTGCCCGGGCCCTCCAGGCGAGGCCTGGG  
CCTCACACACAGGTGAGGGAGGCCCCACAGCCAGTAAAGTGGAGATCCAGAGGGCT  
AGAGCCACCTCCGAAGCCCATGGGC

>2672

CCCCATTCTCTCCCCTATTGCTGGCTCTGCAGGGCTCTGATCAAGCGGATCCAAGCCA  
TGATTCCAAGGTGAGGCATCCAGGGCCTCAAGAGCCCAGGAGCACACGCATACCTGT  
AGCTCCCTGCAGCTCCCACCTCT

>2673

GGCCGCATGCTGCCCCAGCTGGTCTGCCGCCTCGTCTCCGGTGCTCCATGGATGACA  
GCGCTGGCCCAAGTGAGCCCACTGCCCCCTCCTTAGCCCAATGCCCGCTCTCCTCCTCC  
CCCTACCCTGCCACTGCATGACC

>2674

CAGCAGCGAGCAGGCCATACCACAGGCAATGCTCCAGGCCTGTGTTGGCTCCTGGCTG  
GACAGGGAAAAGGTATGGGCTGGGCACATGGGGACTCATGGTCAGGGCCCGTTCAAG  
GCAGAAGGCTGAGCCCAGGAAAGGC

>2675

TGTGGAGCAGCACACGCCCCAGCTGCTGACCCTGGTGCCAGGGGCTGGGATGCCCA  
CACCACCTGCCAGGTACACCCAACCCCTCCAAGTTGGTCCTAGGACTTCCCTTGGCT  
CCCAGAGCCCCACCCCTTTGGGCC

>2676

TGTCGCTGCAGGTGGAGCAGCTGCTCCACCACCGGCGCTCGCGCTACCAGGACATCCT  
CGTCTTCCGAGGTACCGCCGCTGCCCGCAGGCGCCTGCCCCCTAGGCTCAGCCCGGG  
CCGCCTGCTGCCCGCCTCACGGGC

>2677

GAGAGACGAGTTCTCTACCAGGAGATGATCGCCAACCTGCCTCTCTGCAGCCACCCC  
AACCCGCAAAGGTACCCAGTGTCCTGGAACAGTGCCGGACGAGGGGCGGCCCC  
AGGTGTGCTCCGGGCTCTTCCAGA

>2678

TGGAGGTGTCCTGCGGGAGGTGGTGAAGCACCCCTCCGTGGAGTCCGTGGTCCAGTG  
TGAGATCGACGAGGTGAGTGCCGGCGTAGAGCCAGGTTTGTGCTGTTCTCCAGC  
GGCCAGCTGTGCCCTGAAATGGCTG

>2679

GGTTTTGAGTTCATGAAACAGAATCAGGATGCCTTCGACGTGATCATCACTGACTCCTC  
AGACCCCATGGGTAAGCAGTGGATGGGCCCCAGGGTTTTCTGGCAGCTGCAGGTCTGG

AGGTCAGCCTCCCCAGGCCTTC

>2680

CTCTTCAAGGAGTCCTATTACCAGCTCATGAAGACAGCCCTCAAGGAAGATGGTGTCC  
TCTGCTGCCAGGGTGAGCCACAGGCCTGGAGCACTGGGGCGGGGCGGGGTGGGGCA  
GGGCAGGCCCTGCCGGATGCTGATGC

>2681

CTATGCCTACTGCACCATCCCCACCTACCCCAGCGGCCAGATCGGCTTCATGCTGTGCA  
GCAAGAACCCGGTGAGATGGGGGTGTCTGGGGGTGGGGGTGGGGGGAAGGTGGGC  
ATAAATAGAGATCCCTGCCCTGCC

>2682

GATGCAGCTGAAGTACTACAACCTCCGACGTGCACCGCGCCGCTTTGTGCTGCCCGAG  
TTTCCCCGAAGGTGGGTGGCCTGCGGGGCTGGGTGGTGGGACCCAGGGACCCAGAG  
CGCCCTCCTGACTGGCCTCATGTCC

>2683

GTCGGAAGAGGTGTGGCGGCATCCTAGTGAGAAAGGACTTTGTGCTGACAGCTGCTC  
ACTGCCAGGGAAGGTAAGGAGCAGCACCCAGCTCACCTCCTGAGTTCCCCCTACAGGG  
ACCCTTGTTTTCTCCTGGGGACTGCA

>2684

TGTGAAAAGACCCATCCCCATCCAGCCTATAATCCTAAGAACTTCTCCAACGACATCA  
TGCTACTGCAGGTGAGGCACACTCCTGCCACTCTTGCTCTTCTTGGTCCAGTTGGTTCC  
ACTCCCACTGGGATGCCGGCCC

>2685

CCATGGCAATTACAGCAGAGCCACTGAGATTTGTGTGGGGGATCCAAAGAAGACACA  
GACCGGTTTCAAGGTTGGGTTTCCAGCCTCTACCCAGAAAGACCACAGGGAGAGAGG  
AACTTGAGGGAGTTCTGGGGTATGAC

>2686

GCAGATCTTTCGGATACCGAGCTGACCACCTTGCTGCGCCGGTACAACATCCCGCACG  
GGCCTGTAGTAGGTACGCGCGCGGGCGGGACCCCTTCCGGGCCCTTCTTCTCGTG  
CTCCGCCTTCGCGACCTCCCCGCT

>2687

GAGTACGAGACCCAGAGGCGGGCTCTCGCCCCAGCTCGTCCGCGCCTCCTCTT  
ATAGCTTCTCTGGTGAGAGCCTCGCCTGTGGGGTACAGCCTGGGACGCGGGGAGGATGG  
GGTCGCGAGGGTGTGGCAGGGGGG

>2688

TCGACTAGAGGGGATGCAGATATGTATGATCTTCCCAAGAAAGAGGACGCTTACTCTA  
CCAGAGCAAGGGTAAGGCAGGGTTGGGTGGGCACGCTGGCACCTTACCCGACTTC  
GTCAGGGACCCCGCTCACAGGGAG

>2689

TGCCGGCCCGTCCAGGGCTGTCCGCCAGTCAGTGACTTCATTCCAGATGCTGACGCT  
TTCCATCACCAGGTGAGCTGGCTGGCAGGCGTCTGTACTTGGGTACAACCTAGGGGA  
TCGCGGCTGTGTTTGATAAATCC

>2690

GTTGTGGGTCTAATTCAAGACCTCAAGCCAAACACCATCATGGTCTTAGTGAACATAT  
TCACTTTAAAGGTAAGACTTTCAGATGTCAATTTTCAGTCTAGGGCTCAGATACTTGGG  
TGGAGTGCTGAGGGGAGCTCAT

>2691

AGATGGAGTCAGTGGAAGCTGCCATGTCATCTAAAACACTGAAGAAGTGGAACCGCTT  
ACTACAGAAGGGGTAAATGCCTTAGAGGATGTGTGGGTGGAAGGTGGGCATAAAAGT  
GCAGGTGAGACAGAGTTCAGCAGAA

>2692

TCAGCATGCCTATTCTGAAAATGCTGATTTTTCTGGACTCACAGAGGACAATGGTCTGA  
AACTTTCCAATGTAAGTTGATAAACTAGAGTTCTTAAATGTATGAACTGGAAGAGCAAT  
TAGGAGTCAATTGATTCAACTT

>2693

GCTAACGCCTCTTTTTCCCCCTAATTGTTAAAAGCTATGGACTGCAGGAAGATGGCCCCG  
TTCTTTACAGGTATGAGCTAATCTTAGAATAGTGAACCTTTTTTTGATTGCTAGAGATTG  
CCAGCTTAGGAAGTAATGTTT

>2694

TGCCCCAGGAGGAGCCTGCAATTCGGCCTCGGTCTTCCAGCGTGTGCCGCCATGG  
GGATACAGCACAGTAAGAACTGCCTGACTTCGATGCTTCTGCCCTGGCCCTCATGTGT  
CTCCTGACTATCTTTCCAACACT

>2695

TGCTGGGGTCTTTTTGTGCCTGCCCTCCCTCCTTCTACGGACGGAAGTGTGAGCACGAT  
GTGCGCAAAGAGTAAGCAATTCAGAGGGGCGGGGAGCCGTGGAGAGGAGAGAGAAA  
GGGAAGTGAAATTCAGACCCAAG

>2696

AAGTGTCCCTGTGTAAATGCTGGCACGGTCAGCTCCGCTGCTTTCCTCAGGCATTTCT  
ACCCGGCTGTGGTAAGCGGAGGTTCTCCTTTCTTTTGCCTTTGAAGTTACGTAGTT  
GCCTTGGGGGGTGTAGTTAG

>2697

CGCCCCGAGACCGCCGTCGCTCGGACGCTCCTGCTCGGCTGGGTCTTCGCCAGGTGG  
CCGGCGCTTCAGGTGAGTGGACCCAGCCCTGGAAGCCCGGGGCGGCCACACGCAG  
GAGGGAGGCGACAGTCCTGGCTGGC

>2698

CAACTAATTTCAAGACAATTTGGAGTGGGAACCCAAACCCGTCATCAAGTCTACAC  
TGTTCAAATAAGGTAAGCTGGGTACAGAAAAAGAAAATTAAGTCTTTGATGTTTCTAC  
TGTCTATGCTGAACAAGAATGT

>2699

GTGGAGAGCACCGGTTCTGCTGGGGAGCCTCTGTATGAGAACTCCCCAGAGTTCACAC  
CTTACCTGGAGAGTAAGTGGCTTGGGCTGTAATACCGTTCATTCTTGTTAGAAACGTCT  
GAACATTCTCGTGATCTTGTC

>2700

CCTCCGGGATGTTTTGGCAAGGACTTAATTTATACACTTTATTATTGGAAATCTTCAAG  
TTCAGGAAAGGTGAGCATTTTTAAATTTGTTTTATGACCTGTTTTAAATTGTGAATACT  
TGGTTTTACAACCCATTTCT

>2701

CGAACAGTTAACCGGAAGAGTACAGACAGCCCGGTAGAGTGTATGGGCCAGGAGAAA  
GGGGAATTCAGAGGTGAGTGGCTCTGCCAGCCATTTGCCTGGGGGTATGGGTGCTGTG  
GGTACTTCTGGAGGAGTAGCTCCA

>2702

GTCCGAGGCTTGCAGCTGCCTGGCTGCCTGGCCCTGGCTGCCCTGTGTAGCCTTGTGC  
ACAGCCAGCATGGTAAGGGAGTGCTTGCAGGCTGGAACAGGCTGGAGGACTGGGGTG

TGGGCCCATGGGCTGGGGTCTCCTG

>2703

GCGAGAGTGCCTGGAGGAGACGTGCAGCTACGAGGAGGCCTTCGAGGCTCTGGAGTC  
CTCCACGGCTACGGTGAGCCTGGGCTGCTCGGACGGTGCCGGGGCCTCAGACCGGGC  
CCAACTCTAGACACTTCCACAGAGAA

>2704

GGCATGTGAACATCACCCGGTCAGGCATTGAGTGCCAGCTATGGAGGAGTCGCTACCC  
ACATAAGCCTGAGTGAGTGAGGGTTCGGCCTTCCACCATGGGCTGAGAACAGGGAG  
CAAGCGTACCTCAAGTTCAACAGCC

>2705

ACCACGGGACCCTGGTGTACTACTACAGACCCACCGTGAGGAGGCAGGAATGCAGC  
ATCCCTGTCTGTGGTAGGCTGGGGGCGAGTGGGGCGACCCATGACCAAGCCCGGGGC  
TTCATGGGGCCTGGCAGCCTGGGATG

>2706

GAGGAGGGCGTGTGGTGTATGTGGCCGGGAAGCCTGGCGACTTTGGGTACTGCGAC  
CTCAACTATTGTGGTGAGCTGCCTGGGTAGGGGGCCTGAGTTGCAGGGACAAATCCTA  
GTGGGAATAACAACAGCCGCTTCTG

>2707

GAAGGGCGTACCGCCACCAGTGAGTACCAGACTTTCTTCAATCCGAGGACCTTTGGCT  
CGGGAGAGGCAGGTGAGGTAGTGGGCATCCGAGGGGATGCGGGGCTGCGGGGCTGGT  
GGCCAGGACTTGCCCTCACTGCTT

>2708

AGCTCCTGGAATCCTACATCGACGGGCGCATTGTGGAGGGCTCGGATGCAGAGATCGG  
CATGTCACTTGGTGTGTCTGGAGCCCTGCGCTACCATTCACTCCTGGGGCAGGTGT  
GCTGCTGGACCCCACTCAGG

>2709

ACCCGCCCTGGGACAAGAACTTACCGAGAATGACCTTCTGGTGCGCATTGGCAAGC  
ACTCCCGACAAGGTACAGAACTGGTGCCCGTGGGTGTCTGGCAGGGGTCTGAGTC  
CTCAAAGCGATCATGAGGGGCCTTG

>2710

TGAAGAAGCCTGTTGCCTTCAGTGACTACATTCACCCTGTGTGTCTGCCCGACAGGGA  
GACGGCAGCCAGGTGGGCCACCAGATGCTTGTAGCTGAGGGGCAGAAGCCAAGTTC  
TGGCCTGGCTCTGATACCAAGTAG

>2711

TTACAAGCCTGATGAAGGGAAACGAGGGGATGCCTGTGAAGGTGACAGTGGGGGACC  
CTTTGTCATGAAGGTAAGCTTCTCTAAAGCCAGGGCCTGGTGAACACATCTTCTGGG  
GGTGGGGAGAACTCTAGTATCTAG

>2712

TCTTCTACCAATCTGCTCCCCAGAGGGCTGCCTGCTGTGCACTTGGGTCTGGAGCCC  
TTCTCCACCCGGTGAGTGGCCAGCAGGGTGTGGGGTTATGTGAGGGTAGAAAGGACA  
GCAAAGAGAAATGGCCTCCAGCT

>2713

GGATTGAGGGGAGAGGCCCAACAGGGAGCCACGCCAGCCAGACACCCCGGCCAG  
AATGGAGCTGACTGGTGAGAACACACCTGAGGGGCTAGGGCCATATGGAAACATGAC  
AGAAGGGGAGAGAGAAAGGAGACACGC

>2714

TCCTCCTGCTTGTGACCTCCGAGTCCCTCAGTAAACTGCTTCGTGACTCCCATGTCCTTC  
ACAGCAGACTGGTGAGAACTCCCAACATTATCCCCTTTATCCGCGTAACTGGTAAGAC  
ACCCATACTCCCAGGAAGACACC

>2715

TCACCCTTTGCCTACACCTGTCTGCTGCCTGCTGTGGACTTTAGCTTGGGAGAATGGA  
AAACCCAGATGGTAAGAAAGCCATCCCTAACCTTGGCTTCCCTAAGTCCTGTCTTCAGT  
TTCCCACTGCTTCCCATGGATT

>2716

CCTCCTGGGGCAGCTTTCTGGACAGGTCCGTCTCCTCCTTGGGGCCCTGCAGAGCCTC  
CTTGGAACCCAGGTAAGTCCCCAGTCAAGGGATCTGTAGAAACTGTTCTTTTCTGACT  
CAGTCCCCTAGAAGACCTGAGGG

>2717

TACACGTGTGCACTCCACCACTCTGGCCATTCCCCACCATCTCCTCCCAGAACGTCAC  
AGTGCTCAGAGGTGAGACAAGCCCCAACAAGGTCAAGTGAGCTGGGAGAGCCAGG  
CTCGGGGACAGCAGGCAGTTCCTT

>2718

AGTACAAGTGCCTGGTGATCAAGTATGCCAAAGACACTCGCTACAGCAGCAGCTTCTG  
CACACATGACCGGTGAGTCCCTGCCCTGCGAGTCTGTCCAGTGGAAAATCACAAGG  
CACAGGACACACTGTTAGGACTCT

>2719

CTGCCTGCTCCGAGACGTGGCCCAGGAGGCCCTGGGCGTGGCTGTCATAGGCATCGAC  
GAGGGGAGTTTGTAAAGTTGGCTGTCTTGGCATCACTTCTCCTGCCTCCGCTGTGTC  
CTCCCGTTTTCCCTCGCTGACTT

>2720

CTGCGAGGCCATGGCCAACGCCGGAAGACCGTAATTGTGGCTGCACTGGATGGGAC  
CTTCCAGAGGAAGGTAAGGCGTCTGATCCAGGTCTGGAGCTGGGATTGAGGAGGGCA  
AGAGGCTTCTGGATGGGCACAGAGAC

>2721

GCTGACGGCGGTGTGCATGGAGTGCTTCCGGGAAGCCGCCTATACCAAGAGGCTCGGC  
ACAGAGAAGGAGGTAGCTCCACCTGCCTTCCCTGCAGGCCGGCGGGGTGGGGTATG  
GCTCTGCCTCCTCCTGTCTGGCC

>2722

ATGAGGATGCTGGGCCAGACACCCACCAAGGAGGAGCTGGACGCCATCATCGAGGAG  
GTGGATGAGGACGGTGAGCGGGTGTCCCTCGGAGGCAGGGGATGGTGGGGAGAGGC  
GGCAGCGGCTGGGCTCAGGCTCAGTCT

>2723

GCCAGATGAAAGAGGACGCGAAAGGGAAGAGCGAGGAGGAGCTGGCCGAGTGCTTC  
CGCATCTTGCACAGGTGCGCTGGGGGCCCGGAGCCGAGGGAGGGGCTTAGCAGTCA  
GAACCCGGCCGGCAGCGCTGGAAGCTT

>2724

ACGGACGAGGAGATCGAATCTCTGATGAAAGACGGCGACAAGAACAACGACGGCCGC  
ATTGACTTGCACGGTGAGGGCCAACGGGAGCTTGGGAAGAGCGGGTGGGAGCCCCAG  
AGGACGGCGGGCACTGGTGCCTGGCT

>2725

CCTCTGCCTGGGCCTCGGTCCCTCCTGCACCTGCTGCCTGGATCCCCGGCCTGCCTGG  
GCCTGGGCCTTGGTGGGTTTGGTTTTGGTTTCTTCTGTCTCTGACTCTCCATCTGTC

AGTCTCATTGTCTCTGTACAC

>2726

AAGGGTGTGTGGCACCACCCTACACCTCCTCCTTCTGGGGCTGCTGCTGGTTCTGCTG  
CCTGGGGCCCAGGTGAGGCAGCAGGAGAATGGGGGCTGCTGGGGTGGCTCAGCCAA  
ACCTTGAGCCCTAGAGCCCCCTCAA

>2727

CAGACTGCCCGTCAGCACCCCAAGATGCATCTTGCCACAGCACCTCAAACCTGCTG  
CTCACCTCATTGGTAAACATCCACCTGACCTCCCAGACATGTCCCCACCAGCTCTCCTC  
CTACCCCTGCCTCAGGAACCCAA

>2728

GATCGTGGCAGGCGCCACCACGCTCTTCTGCCTGCTGCACTTTGGAGTGATCGGCCCC  
CAGAGGGAAGAGGTGAGTGCCTGGCCAGCCTTCATCCACTCTCCACCCAAGGGGAA  
ATGGAGACGCAAGAGAGGGAGAGAG

>2729

GGCAAGCTGAAAAAGAAAAAATGGCCAAGAGGATCCAGCAGGTGTACAAAACCAA  
GACGCGGAGCTCAGGTACCCTTAAGGAGGTGGGGAAGGGCCACCGAGCCACAGAT  
GATGGAGAGCAGACCTTGGGGGCGATG

>2730

AGCTGAGATCCTACAGGAGTCCAGGGCTGGAGAGAAAACCTCTGCGAGGAAAGGGA  
AGGAGCAAGCCGTGGTAGGTGCGGGTTTCTGTACCTTGGGGTCTGTCTCCTCTTTCT  
CTTAAAAGTCTTTCCAGCAAGCTGA

>2731

GGATGCAATGAAGAGAGGGCTCTGCTGTGTGCTGCTGCTGTGTGGAGCAGTCTTCGTT  
TCGCCCAGCCAGGTTGGTGTGCAGGATCCCTGTGTCCCGCCCCTCAAGGCTGTGATGC  
TTCCGGAGGCTCCAGGGGTCTGTG

>2732

AGAAGCAACCGGGTGAATATTGCTGGTGCAACAGTGGCAGGGCACAGTGCCACTCA  
GTGCCTGTCAAAAAGTATGTGCTGAGGCTGGAAGGTGGTGCATGCCTGTGATCCCAGCA  
CTTTAGGAGGCCAAGGTGGGAGGGT

>2733

CAGGCCCTGTACTTCTCAGATTTCTGTGTGCCAGTGCCCCGAAGGATTTGCTGGGAAGT  
GCTGTGAAATAGGTGAGTAGGTGAGAGCACGTGAAACGAGCTGAAATCCCACCTCTC  
CAGTCTCCCCCGCCCCGGAAGGAA

>2734

CCCAGAAGCCCTACAGCGGGCGGAGGCCAGATGCCATCAGGCTGGGCCTGGGGAACC  
ACAACACTGCAGGTGAGGGCACATCCCCAAGGAGGGATTCCCCCTGTGAGAAGCTG  
CTACAGCTGGGGAAAGATTCTGTGAG

>2735

CCCTGGTGCTACGTCTTTAAGGCGGGGAAGTACAGCTCAGAGTTCTGCAGCACCCCTG  
CCTGCTCTGAGGGTAAGTGGCAGCCACCCCGCCTTCCCTGAATGTCCCTGGGGGAGG  
AAAGTCCAGGAGGACAGGCCGATA

>2736

TAGGCAAGGTTTACACAGCACAGAACCCCAAGTGCCAGGCACTGGGCCTGGGCAAAC  
ATAATTACTGCCGGTAGGTAGCACAGGGGTGGGGGGTTTCCAGGCTTGGCAGAACGTGG  
GATTAGGGTGTGAGACGGGGGAAGA

>2737

GCCAAGCCCTGGTGCCACGTGCTGAAGAACCGCAGGCTGACGTGGGAGTACTGTGAT  
GTGCCCTCCTGCTGTAAGGGCTGGGCCCGGCTGCCTCCCTGCACCTGTCTCCCTTCTT  
CACCATCTCCTCGCCACTTTCTAG

>2738

GGTTCCTGTGCGGGGCATACTCATCAGCTCCTGCTGGATTCTCTGCGCCCACTGC  
TTCCAGGAGAGGTAGGGGCTCGGAAACCCAGTTGGTTTTTCCACCCTTAACGCCTAG  
AAACCAAGCCCTTTAGGGGAAAT

>2739

CAGAAATTTGAAGTCGAAAAATACATTGTCCATAAGGAATTGATGATGACACTTACGA  
CAATGACATTGGTAAGAGCTCGTCATTCCCGGCTCCAGTTCATACAGATCACACAACAC  
ACCCACATGCACTCACCTATGT

>2740

CCCCGGCGGACCTGCAGCTGCCGACTGGACGGAGTGTGAGCTCTCCGGCTACGGC  
AAGCATGAGGCCTGTAAGTGAAGGAAGCCTCGGCCCATCCTGTCTGCGGGACAGC  
AGGGGAGGCTGCGGTCCACCAGAGGA

>2741

CGACAACATGCTGTGTGCTGGAGACTCGGAGCGGGCGGGCCCCAGGCAAACCTTGCA  
CGACGCCTGCCAGGTAACCAGGAGTGGCGGCCCATGCTGGGCACAACCCAGGGGAGA  
ATGCCCTGGGACAACAGGTTCTTCA

>2742

CGTCAGCCTTGGCCTCATTGCTGCCCTGCAGGCCACCACCTCCTGGCCTCAGACGAG  
GAGATTGAGGATGTGAGGCCCGGATGGAAGGCTGGGCTGGAGGGGGCAAGGGGCGA  
GGCTGAGACTGGATGGAGACCCCATG

>2743

TGGAATCGGTGACACCCATGACCCTCACGACCCTGGAAGGGGGCAACCTGGAAGCCA  
AGGTCACCATGCTGTGAGTGTCTGCCAGCCGGCCGGGCAGCCTGCAACCTGGTCTAGG  
GCCTTCCCTTTCCCCACCCAGGAGA

>2744

ATAAGTGCCGGTGCCAGGAGGTGAAGGCCGTCTGGAGAAAAGTACGAGCCGGGA  
AAATACACGGCCGGTGAGTCCCGGGCCTGAGCCAGAGCCTGAGCTTGAACACACGC  
TGGATGTGGGGGGCAGCCAGTGCCT

>2745

AAGGACCACTACATCTTTTACTGTGAGGGCGAGCTGCACGGGAAGCCGGTCCGAGGG  
GTGAAGCTCGTGGGTGGGTCCCGCACCCCTCACCTGCAACCCATGCCTCCACCTGCC  
TCCCTCCTCCCTCGCCCTCCTGCAC

>2746

GAGGACTTTGAGAAAGCCGCAGGAGCCCGGACTCAGCACGGAGAGCATCCTCATC  
CCCAGGCAGAGCGGTAGGAGGCATGGCCCTGCAGAGCCCCCATGTCCCCGCGTGGG  
GACATCAGCAGAGCTGCATTGCACGG

>2747

TGATGGAGCAGCATTAACTAAGAAAGACCTGAAGAACCTCCTGAAAGGGAATTTGG  
AGCTGTGCTTCGGGTAAGAACTAACAAGAAAATGAGATCTATTGACTTGAGGCTATGA  
GATTTATTCTCAGAGGAGACCAGAG

>2748

ATGAGGATGCTGGGCCAGAACCCACCCCTGAGGAGCTGCAGGAGATGATCGATGAG  
GTGGACGAGGACGGTGAGCCCCCTCCTCCCCAGGCTCCAGAAGAACCCAGCTGGC



TGGGGGCTGGAATGCTGGCTCTGTTT

>2749

GGTGCATGAAGGACGACAGCAAAGGGAAATCTGAGGAGGAGCTGTCTGACCTCTTCC  
GCATGTTTGACAAGTGAGCACGTGACCCTTGACCTCTGACCCTGACCCACACTCAAGC  
CGAGCTGTACAGGAGGGCAGTCTCA

>2750

ACGGAGGACGACATCGAGGAGCTCATGAAGGACGGAGACAAGAACAACGACGGCCG  
CATCGACTATGATGGTAAGCGGGTGGGTGGGCTGATCTCTGCCTCCATGCCCTGCCCA  
GCCCTACCCTCAACCCACACCTGC

>2751

GTTTAACTGGGTGTCCCGGCTGGCAAACCTCACGCAAGGCGAAGACCAGTACTATCTG  
CGGGTACCACGGTGAGCTGTGTCCCGCCACATGCTGTCTGGTCCGAGCCCGACGTGT  
GATCGAGCAGGGGCATGTGTGCTT

>2752

CCAGGAAGAACCCTAAATTTATGGAGACCGTGGCGGAGAAAGCGCTGCAGGAATACC  
GCAAAAAGCACCGGTAAGCAGGCGGGCCTTTCCTGCGCGTGCAGGGCCCAAGTGTGTC  
TCTGGGAGCCACAAAAAACAACAA

>2753

AGGAAGGACGACCGCACGGGCACCGGCACCCTGTCTGGTATTCGGCATGCAGGCGCGC  
TACAGCCTGAGAGGTGACGCCGCGGGCCCTGCGGGACGGGTGGCGGGAAGGAGGG  
AGGCGCGGCTGGGGAGAGCGCTCGGGA

>2754

ATCCCTCTGCTGACAACCAAACGTGTGTTCTGGAAGGGTGTGTTTGGAGGAGTTGCTG  
TGTTTATCAAGGTAAAGAAGTCTGCTATTAGAAGTCAGTAGTCTGTTCTCAACACA  
GCAGCCAGTGAGATCCTTTCAA

>2755

GGGGACTTGGGCCAGTTTATGGCTTCCAGTGGAGGCATTTTGGGGCAGAATACAGAG  
ATATGGAATCAGGTGAGGAGATAGAACAATGCCTTCCATTTCCGGGTGCCCTTCTAGC  
ACGTGTTTGCTCCGTTGTTTAG

>2756

AGAGTGATTGACCCATCAAACCAACCCTGACGACAGAAGAATCATCATGTGCGCTT  
GGAATCCAAGAGGTTGAAAGAACCCCGTCGTCTTCATTATACTAACCATACTCTTAGA  
GGGAAGCAATCTGGTTTTGTGCA

>2757

CGGTGTGCCTTCAACATCGCCAGCTACGCCCTGCTCACGTACATGATTGCGCACATCA  
CGGGCCTGAAGGTGGGCTGTCTCGGGAAGGGTGACTTGCCAGCCTACCACATGAGCT  
CTTCAGTTCTTTAATATGGGAAAA

>2758

AGGTGACTTTATACACACTTTGGGAGATGCACATATTTACCTGAATCACATCGAGCCAC  
TGAAAATTCAGGTAAGAATTAGATGTTATACTTTGGGTTTGGTACCTTCTTTGATAAA  
AGGTTGACTGTGGAACAGGTA

>2759

CTGGTCTCCGAGAAGCTGAACGTCCCAGTGCGCCAGCAGCGGCTGCTGTTCAAGGGC  
AAGGCCCTGGCAGGTACCCAGGGAGAGGAGACGCCCGGGGAGCCCCGAGGAAGCG  
GGACCGGGGTGCGCGGGCCGAGGCCAG

>2760

GATCTCCAAAGTCTTGGCCCGCCACTTCAGTGC GGCAGATGCCAGCAGGGTCCTGGAA  
CAGCTACAGAGGGTGAGAAGGGTAACCCTGGGCATCCTCTTCAGGCCAGTTGCTCCC  
AGCCCCTACCTCTGTTGCAGTGTA

>2761

CGCACATCACCTCCAGGCCCTCAGAACACCTGCCCCAGCCCCACCATGCTCATGGCGT  
CCACCACTTCCGGTAAGGCTTGCCCTCCATGAGTCCGGTGGGCAGAGTGGGTTTGAC  
GATTCAGGGAAGCCCCTCTTTCTA

>2762

GTGCTGTGCTGGGCACCCTTCTTCTGCTGTCAGCTGTGGGCCGCGTGGGACCCGGAGG  
CACCTCTGGAAGGTGGGTGTAGCCGTGGCTAGGGCTGACGGGGCCACTTGGGCTTGG  
CCGCATGCCCCTGTGCCCCACCAGC

>2763

TCTGGTAGAAAAATGAAGAGGGTCTGGTACTACTGCTTGCTGTGGCATTGGACATG  
CTTTAGAGAGAGGTAAGATTTCTTTTGTGTGACCATTACAGGAATTCTTACTAGTTTA  
ATTTTATATTACTACTTAAAAA

>2764

GCCGGGATTATGAAAAGAATAAAGTCTGCAAGGAATTCTCCCATCTGGGAAAGGAGGA  
CTTCACATCTCTGTAAGTGTGCAGCAGCCACTCACTCTGTTGGTGATTTGATCTTGAAC  
AAAAGTGTGAGGTAACCTT

>2765

GAAGGAAGTTGTCTCCTTGACCGAAGCCTGCTGTGCGGAAGGGGCTGACCCTGACTG  
CTATGACACCAGGGTAGGTTTCTGTGGCTGGCCGTCTCTGTGGCAGCCAGAGAAGGA  
AGCCAAAATAGCCTTTATACCAGC

>2766

CCTACGTGGAACCCACAAATGATGAAATCTGTGAGGCGTTCAGGAAAGATCCAAAGG  
AATATGCTAATCAGTGAGTGCCTTCATCATAAATAGAACTTTAGGACCTAAAGTATCAGA  
AATGACTCTAATCTAACCCCTA

>2767

CAAGAGTTATCTTTCTATGGTAGGGTCTGCTGTACCTCTGCAAGCCCAACTGTATGCTT  
TTTGAAAGAGGTATGTCCATTTACTTATTATATGTTTACGTTTTTTCTTCTAATAGCAT  
TCCTTTTAGATAATGGTA

>2768

TTCTCACCCTCTGTCAAATAGAGTCTGCTCACAATATGCTGCTTATGGGAGAAGAAA  
TCAAGGCTCAGGTAAGATTAAGTGCTATTGTCATATTTAGATGTTGGTTCTGCACTGT  
CTATCCATAATATTAGGGTTT

>2769

AGCTGAAGATATTACTAACATCCTCTCCAAATGCTGTGAGTCTGCCTCTGAAGATTGCA  
TGCCCAAAGAGGTAAGACAAGCTTTATTATCATTATCACCATGTGCCAGGTATTGAGTG  
CCAAGTACTGAGTGGCAGGTAC

>2770

AGCTTCCAGATGTAGAGTTGCCACAAACAAAGATGTGTGTGATCCAGGAAACACCAA  
AGTCATGGATAAGTAAGTAGAGGTGATGTGAAAACGTGTTCCATTTAAGTTCATCTG  
GACAAAAAGTGGGGGCCAGCCAG

>2771

TGAGCCAACCCTAAAAAGCCTTGGTGAATGCTGTGATGTTGAAGACTCAACTACCTGT  
TTAATGCTAAGGTATATTTGTTGGATTTTCTTTATCAAGCACATAGATCAAGGGTTGGA

AAATTATAGTTCATGGGCCAAA

>2772

CTTTCATTGACAAGGGACAAGAAGACTATGTGCAGATTATTCAGAAAATACATTTACTGAG  
TACAAGAAAAAGTAAAGAACTTGTCTGGCTGTATCCTCCAAATTTATCAATAATATTTT  
CATAGTACTATGAATTGAAAG

>2773

TAACAAGCGCTCAGACTTTGCCTCCAAGTCTGTTCCATAAACTCACCTCCTCTTACT  
GTGATTAGAGGTAGGAAAATGTAACCCTCCACTAACATGGCAGAATCTTTAAGAA  
CGTATGCACTCCAATCTACTCAT

>2774

CTCCGCGTGCTACTTCCAGAAGTCCCGAGGGGCGGCAAGAGGGCCATGTCCGACCT  
GGAGCTGAGACAGGTACTTCCCACTGTGGCCATCTCAGGGCAGCCATAGCGGGCAGT  
GCTGACACCCTGGGTCAGGGGCTAG

>2775

TGCCAGTCCGGCCAGAAGGCGTGCGGGAGCGGGGCGGCTGCGCCGCTTCGGCGTT  
TGCTGCAACGACGGTGCGCGCGGGGGCGGGCCTGGGGGGGGGCGCAGACGCTTGG  
GTGGGGGGGACGCGGGCCTGCGGCGGG

>2776

CGTGGGCCAGAAGACCAGGACATATCTATTTCTTTGCATGGGATAAAAGCTCTGCTCT  
TCAGTTTCAGGTGAGAGAGGCCAGCATAAAAAAGCTACCGAGTCTAGAGAGACGGA  
TGGGAGATGGGCTCTGGAATCACA

>2777

TGGGTGGTGGCTCTGCTAGTGAATCTGACCCAAGTGGATTCTCCATGACTCAAGGCA  
CAGACTCTCCAGGTAAGAACAGAGCAATTGTTTTTTCCAGTGTGTATGCAAGAATTG  
GCATGGGGGAGTGATGCCTTTCTT

>2778

AGACAGGCCGTGGATGGGGTCTGTAGACACAAGTACAGGCTGGGCGCACCCCTTCACT  
GTGGGGAGAAAAGGTGAGCTGGAAGCTGAGGTCTGGCGGGGCTCAGGAATGTCCCC  
ATGTGAACCATGGCTCTTCTTTCTTA

>2779

GAACTGGACATGTCTACACCTGCCTTGTGATCACTCCAGCCTGCTGAGCCCTGTTTC  
TGTGGAGTGGAGTGAGAATTAGTTTCTAGTACTCTCTGGGCTGACTCAGGACTATACT  
GACTCAATACAGAGCCTGTGTC

>2780

ATTGCAGCCTTCTACTTGGGCTAATCTTCTTCTGGTGGGAATCGTCATCCAGCTAAG  
GGCTCAGAAAGGTAATGAGCCTGTGAGGAGTGCCCTGCCACCTGTCCCAGACCTTCCC  
CACTCCCACCTTCCCTAACGTCA

>2781

GCCGTCATGGCGCCCCGAACCCTCGTCCTGCTACTCTCGGGGGCCCTGGCCCTGACCC  
AGACCTGGGCAGGTGAGTGCGGGGTCCGGAGGGAAACGGCCTCTGCGGGGAGAAGC  
AAGGGGCCCCGCTGGCGGGGGCGCAA

>2782

AAGGCCCACTCACAGACTGACCGAGAGAACCTGCGGATCGCGCTCCGCTACTACAAC  
CAGAGCGAGGCCGGTGAGTGACCCCGGCCGGGGCGCAGGTACGACCCCTCATCCC  
CCACGGACGGGCCGGGTGCGCCACAG

>2783

CTGGAGGGCACGTGCGTGGACGGGCTCCGCAGATACCTGGAGAACGGGAAGGAGAC  
GCTGCAGCGCACGGGTACCAGGGGCCACGGGGCGCTACCTGATCGCCTGTAGGTCTC  
CCGGGCTGGCCTCCCACAAGGAGGGG

>2784

GGAGAGGAGCAGAGATACACCTGCCATGTGCAGCATGAGGGTCTGCCAAGCCCCTC  
ACCCTGAGATGGGGTAAGGAGGGAGATGGGGGTGTCATGTCTTTAGGGAAAGCAGG  
AGCCTCTCTGGAGACCTTTAGCAGGG

>2785

CTGGTTCTCCTTGGAGCTGTGATCACTGGAGCTGTGGTCGCTGCTGTGATGTGGAGGA  
GGAACAGCTCAGGTGGAGAAGGGGTGAAGGGTGGGGTCTGAGATTCTTGTCTCACT  
GAGGGTTCCAAGCCCCAGCTAGAAA

>2786

GGATGCACTTCTGCGGGGGCTCCCTCATCCACCCCAGTGGGTGCTGACCGCAGCGCA  
CTGCGTGGGACCGTGAGTCTCCCGGGGCTGGAGGGGTGGGGAAGGGCTGGATGTGA  
GCCCTGGCTCCCGGGTGTCTCTGGG

>2787

CCTGCCTCAGAGACCTTCCCCCGGGGATGCCGTGCTGGGTCACTGGCTGGGGCGATG  
TGGACAATGATGGTGGGTCTGGGGACAGTGGAGGTGGGGCCAGGGTCTTAGCCACAG  
CCCAGCCCCTGGGTCCCTCTGGGCT

>2788

GGGAGACGACGTCCGCATCGTCCGTGACGACATGCTGTGTGCCGGGAACACCCGGAG  
GGACTCATGCCAGGTGGGCCCCGCTGTCCCCCGCCCCCGCCCCCAACCCCACTC  
CCAGGCCTGTTGCGCGAGCGCTGAC

>2789

CTGAAGATCTCTGAGGAGGATGAGCTGGACACCAAGCTAACCCGTATCCCAGTGCCA  
AGAAGTACAAAGGTAAGCGGCCACTCCTTTAACTAGCTGCACCTCTGCCTCGTCCCGT  
TGACTATCCTTGGAGTACTTGAGT

>2790

AGACCAGTGGCACTGTTGTTTACAAGATGATGTTTGAAACTATTCCAATGTTCAAGTG  
CGGAACTGCAGTAAGTGCTTGAATTCTCATCCTTCCATGTATTGGAACAGTTTTCTTA  
ACCATATCTAGAAGTTTACAT

>2791

TCAGCCGTTACCTGTGTGTGGTGATATCAAAGTAGAGTTCTCCACAAACAGAACAAG  
ATGCTAAAAAAGGTTTGTACTTTACTTTTATTGGGAGAAATATCCAAAATAAGGACAGA  
TTAAAAGCTATATTTTATTTAT

>2792

TTTAACAAAAAATGATCTTGACAAAGCAAATAAAGACAAAGCCAACCGATACTTTTCT  
CCAAATTTTAAAGTCAAGTAAATTAACATTTTGTGGGGGTGGTGACTTGATGTATGT  
GATGTGTGTTAATTCTAGGAG

>2793

AGCAAGGACTAGAGTTCCTGACCTCCAGGCCAGTCCCTGATCCCTGACCTAATGTTATC  
GCGGAATGATGGTAAAGTAAAGTGTCTTGCATCTGCATAGAGAGAGTCTGGGAGCT  
TAGGAAGTGATGGGGAACAGTGA

>2794

AAGAAAAGCCTGGAGTGCACGAAGTTGTGCCTACCCAGATTGAGAATGTTAAGGGC  
ACTGAGGACTCAGGTGAGGAGAGGTGACCTGGTGCCCATGCTCACCTGCCCTCTCCCT

CTTCTTGCCCCACCCGTCCATCCA

>2795

CTTTTATCCCTCCTCTTCATTGGTTTAATGTATCGCTACCAACGGTGGGAAGTCCAAGCTC  
TACTCCATTGGTGAGTGGGGGCTTTGGGAGGGAGAGGGAGCTGGTGGGGGTGAGGGA  
GGACATGGGTGGGTGCGATGGAC

>2796

GCCTCCGACCCCATCCCAACCCCTTCAGAAGTGGGAGGACAGCGCCACAAGCCA  
CAGAGCCTAGACAGTGCCTTTCTCCCGCGGCTGGAGACGAGGAGGCTGGGGGAGGGC  
CGGGGGAGCGCGGGAGGCGTCAGAGG

**Online Supporting Information S<sub>1</sub><sup>-</sup> represents the negative dataset consisting of 2800 false splice donor site sequences.**

>1

ACTGTGTCCTCATTTCATGTCATTGCTCCTCAGCTGAAGGATGAAAGAGATTGGCAAGG  
AAGCAGGAATGAGTCAGCTTTGGGGGAATATTACCTGGTGGCTCCCATCATTTATTGCT  
TTAGGACATACCCTTTTACCTAC

>2

TCCTCAGCTGAAGGATGAAAGAGATTGGCAAGGAAGCAGGAATGAGTCAGCTTTGGG  
GGAATATTACCTGGTGGCTCCCATCATTTATTGCTTTAGGACATACCCTTTTACCTACTTG  
CTATCATGCTGGACCTCAGCAT

>3

ACCTCAGCATTTCAGGGACCAGAAAAGATGGGGACACCAATGCAAGCCCAAGACTAC  
CATCCAGAGGACCGTTCTGCCCATGCTGCTTTCTCTAGTTTTGCTTTCAGAGTGGTGT  
CACCCCACTTGCTAACTCAAGAGT

>4

AGATGGGGACACCAATGCAAGCCCAAGACTACCATCCAGAGGACCGTTCCTGCCCATG  
CTGCTTTCTCTAGTTTTGCTTTCAGAGTGGTGTACCCCACTTGCTAACTCAAGAGTGC  
ATCACTAGGCTTCCTGAGCAGGT

>5

CAAGCCCAAGACTACCATCCAGAGGACCGTTCCTGCCCATGCTGCTTTCTCTAGTTTTG  
CTTTCAGAGTGGTGTACCCCACTTGCTAACTCAAGAGTGCATCACTAGGCTTCCTGA  
GCAGGTTTGATCAGGATTTGGCC

>6

AGCCCAAGACTACCATCCAGAGGACCGTTCCTGCCCATGCTGCTTTCTCTAGTTTTGCT  
TTCAGAGTGGTGTACCCCACTTGCTAACTCAAGAGTGCATCACTAGGCTTCCTGAGC  
AGGTTTGATCAGGATTTGGCCTG

>7

CCGTTCTGCCATGCTGCTTTCTCTAGTTTTGCTTTCAGAGTGGTGTACCCCACTTG  
CTAACTCAAGAGTGCATCACTAGGCTTCCTGAGCAGGTTTGATCAGGATTTGGCCTGG  
GTCTGTTGGTCAGGGAGGCAGAG

>8

TAGTTTTGCTTTCAGAGTGGTGTACCCCACTTGCTAACTCAAGAGTGCATCACTAGGC  
TTCCTGAGCAGGTTTGATCAGGATTTGGCCTGGGTCTGTTGGTCAGGGAGGCAGAGGT  
GTGGGGAGAAGGGTGAAAGGTGA

>9

TCACCCCACTTGCTAACTCAAGAGTGCATCACTAGGCTTCCTGAGCAGGTTTGATCAG  
GATTTGGCCTGGGTCTGTTGGTCAGGGAGGCAGAGGTGTGGGGAGAAGGGTGAAAGG  
TGA CTGAGCCAGGGTTCACAGGCTC

>10

CCCACTTGCTAACTCAAGAGTGCATCACTAGGCTTCCTGAGCAGGTTTGATCAGGATTT  
GGCCTGGGTCTGTTGGTCAGGGAGGCAGAGGTGTGGGGAGAAGGGTGAAAGGTGAC  
TGAGCCAGGGTTCACAGGCTCCTCA

>11

GTGCATCACTAGGCTTCCTGAGCAGGTTTGATCAGGATTTGGCCTGGGTCTGTTGGTCA  
GGGAGGCAGAGGTGTGGGGAGAAGGGTGAAAGGTGACTGAGCCAGGGTTCACAGGC  
TCCTCACTCACGGGGCTGAAGCTGG

>12

GATTTGGCCTGGGTCTGTTGGTCAGGGAGGCAGAGGTGTGGGGAGAAGGGTGAAAGG  
TGA CTGAGCCAGGGTTCACAGGCTCCTCACTCACGGGGCTGAAGCTGGGCATCGTCA  
GGCTCAGAGCCCCTAGACGTGCGGCA

>13

GGGAGAAGGGTGAAAGGTGACTGAGCCAGGGTTCACAGGCTCCTCACTCACGGGGCT  
GAAGCTGGGCATCGTCAGGCTCAGAGCCCCTAGACGTGCGGCAGCGGTAGCCCTTCTT  
CTTGAGCACGTGGCAGATCATGAAG

>14

GAGCCAGGGTTCACAGGCTCCTCACTCACGGGGCTGAAGCTGGGCATCGTCAGGCTC  
AGAGCCCCTAGACGTGCGGCAGCGGTAGCCCTTCTTCTTGAGCACGTGGCAGATCATG  
AAGCCTACAGGCCCATGAGGAAGAA

>15

CACAGGCTCCTCACTCACGGGGCTGAAGCTGGGCATCGTCAGGCTCAGAGCCCCTAG  
ACGTGCGGCAGCGGTAGCCCTTCTTCTTGAGCACGTGGCAGATCATGAAGCCTACAGG  
CCCATGAGGAAGAAGACCAGCACAA

>16

GCTGAAGCTGGGCATCGTCAGGCTCAGAGCCCCTAGACGTGCGGCAGCGGTAGCCCTT  
CTTCTTGAGCACGTGGCAGATCATGAAGCCTACAGGCCCATGAGGAAGAAGACCAGC  
ACAAGCAGGAAGAGCATATATAGCC

>17

GAAGCCTACAGGCCCATGAGGAAGAAGACCAGCACAAAGCAGGAAGAGCATATATAGC  
CCATGTTGGGGCGGTTCCAGGTCAGGCTGTGGTTCCGACATGAGGCCCTGGGGGGCG  
AGCGCGGGCCAGGGCGCCTCCTGGGT

>18

ACAGGCCCATGAGGAAGAAGACCAGCACAAAGCAGGAAGAGCATATATAGCCCATGTT  
GGGGCGGTTCCAGGTCAGGCTGTGGTTCCGACATGAGGCCCTGGGGGGCGAGCGCGG  
GCCAGGGCGCCTCCTGGGTTTAGGGG

>19

AGGAAGAAGACCAGCACAAAGCAGGAAGAGCATATATAGCCCATGTTGGGGCGGTTCC  
AGGTCAGGCTGTGGTTCCGACATGAGGCCCTGGGGGGCGAGCGGGCCAGGGCGCC  
TCCTGGGTTTAGGGGGCTGCAGCTGG

>20

CGGTTCCAGGTCAGGCTGTGGTTCCGACATGAGGCCCTGGGGGGCGAGCGGGGCCA

GGGCGCCTCCTGGGTTTAGGGGGCTGCAGCTGGGAATGGGGGAGGGGTAAGAATGCC  
GTCCTCAGGATCTGAAACAAGCACGT

>21

GCCCTGGGGGGCGAGCGGGCCAGGGCGCCTCCTGGGTTTAGGGGGCTGCAGCTGG  
GAATGGGGGAGGGGTAAGAATGCCGTCTCAGGATCTGAAACAAGCACGTCTAAGAC  
GTCCGGCTGAGGTCCGGCCCCACCCC

>22

CGAGCGGGGCCAGGGCGCCTCCTGGGTTTAGGGGGCTGCAGCTGGGAATGGGGGAG  
GGGTAAGAATGCCGTCTCAGGATCTGAAACAAGCACGTCTAAGACGTCCGGCTGAG  
GTCCGGCCCCACCCCCTACCCAACCA

>23

GGGTTTAGGGGGCTGCAGCTGGGAATGGGGGAGGGGTAAGAATGCCGTCTCAGGAT  
CTGAAACAAGCACGTCTAAGACGTCCGGCTGAGGTCCGGCCCCACCCCCTACCCAAC  
CATGGGAGCTGTCCGGGCCAACAGTG

>24

GGGCTGCAGCTGGGAATGGGGGAGGGGTAAGAATGCCGTCTCAGGATCTGAAACAA  
GCACGTCTAAGACGTCCGGCTGAGGTCCGGCCCCACCCCCTACCCAACCATGGGAGCT  
GTCCGGGCCAACAGTGCTGTTTCGC

>25

GATCTGAAACAAGCACGTCTAAGACGTCCGGCTGAGGTCCGGCCCCACCCCCTACCCA  
ACCATGGGAGCTGTCCGGGCCAACAGTGCTGTTTCGCCTTCGGCAAGAGGTCAGCG  
ACAACGCAAGCTCTTACCACGACC

>26

CACGTCTAAGACGTCCGGCTGAGGTCCGGCCCCACCCCCTACCCAACCATGGGAGCTG  
TCCGGGCCAACAGTGCTGTTTCGCCTTCGGCAAGAGGTCAGCGACAACGCAAGCTC  
TCTACCACGACCATGGTCCGCTTCC

>27

CCGGCCCCACCCCCTACCCAACCATGGGAGCTGTCCGGGCCAACAGTGCTGTTTCGCC  
TTTCGGCAAGAGGTCAGCGACAACGCAAGCTCTTACCACGACCATGGTCCGCTTCCC  
CGACGCCCCGAGCGTTCCCTTTC

>28

CGGGCCAACAGTGCTGTTTCGCCTTCGGCAAGAGGTCAGCGACAACGCAAGCTCTCT  
ACCACGACCATGGTCCGCTTCCCCGACGCCCCGAGCGTTCCCTTTCAGCTTGTTCG  
CGCTTCTGTCCCTCCCAAGGACAC

>29

TTCGGCAAGAGGTCAGCGACAACGCAAGCTCTTACCACGACCATGGTCCGCTTCCCC  
GACGCCCCGAGCGTTCCCTTTCAGCTTGTTCGCGCTTCTGTCCCTCCCAAGGACAC  
TGCAGCACGAGATGGGACGGCATT

>30

GACAACGCAAGCTCTTACCACGACCATGGTCCGCTTCCCCGACGCCCCGAGCGTTCC  
CCTTTCAGCTTGTTCGCGCTTCTGTCCCTCCCAAGGACACTGCAGCACGAGATGGGA  
CGGCATTCTTAGGCGGGGAGCA

>31

TCTTACCACGACCATGGTCCGCTTCCCCGACGCCCCGAGCGTTCCCTTTCAGCTTG  
TTCGCGCTTCTGTCCCTCCCAAGGACACTGCAGCACGAGATGGGACGGCATTCTTAGG  
CGGCGGGAGCAGAAATCCTGCCT

>32

CCCTCCAAGGACTGACGACGAGATGGGACGGCATTCTTAGGCGGCGGGAGCAG  
AAATCCTGCCTGAGTCAGCGCCCGCACCTCCTCCACGCCGGCCTGAGCCAGGCCTCTG  
CAGCCCTTCTCTCAGTACTCCCG

>33

CCTGCCTGAGTCAGCGCCCGCACCTCCTCCACGCCGGCCTGAGCCAGGCCTCTGCAGC  
CCCTTCTCTCAGTACTCCCGCACCCCTCTCCCTTTTGGTTTCTCCACCCTGACCACC  
TGCCGACCCGGTACCGGTGAT

>34

TCCACGCCGGCCTGAGCCAGGCCTCTGCAGCCCTTCTCTCAGTACTCCCGCACCCC  
TCTCCCTTTTGGTTTCTCCACCCTGACCACCTGGCCGACCCGGTACCGGTGATTGG  
TTCTGGTTCCGGCTTCTGCTGGG

>35

CCTTCTCTCAGTACTCCCGCACCCCTCTCCCTTTTGGTTTCTCCACCCTGACCACCT  
GGCCGACCCGGTACCGGTGATTGGTTCTGGTTCCGGCTTCTGCTGGGGTTCCGGCTCC  
AGGGGCGTCTAGTGCGGCTC

>36

TCTCAGTACTCCCGCACCCCTCTCCCTTTTGGTTTCTCCACCCTGACCACCTGGCCG  
ACCCGGTACCGGTGATTGGTTCTGGTTCCGGCTTCTGCTGGGGTTCCGGCTCCAGGG  
GCGTCTAGTGCGGCTCAGGGCC

>37

GTTTCTCCACCCTGACCACCTGGCCGACCCGGTACCGGTGATTGGTTCTGGTTCCGG  
CTTCTGCTGGGGTTCCGGCTCCAGGGGCGTCTAGTGCGGCTCAGGGCCCCGACGCC  
CTTCCGGCGCTCATCCCTTGATT

>38

CACCTGGCCGACCCGGTACCGGTGATTGGTTCTGGTTCCGGCTTCTGCTGGGGTTCCG  
GCTCCAGGGGCGTCTAGTGCGGCTCAGGGCCCCGACGCCCTTCCGGCGCTCATCCC  
TTGATTCATCCCCTCCCCCTTCG

>39

CCCGACGCCCTTCCGGCGCTCATCCCTTGATTCATCCCCTCCCCCTTCGCCGCCTCACC  
GGCCCCGGGCTGTGGCTGCGGATACCCGCGCGTGGCAGGCGGGGGAGGGAAGAAC  
AGAGAAGGATGCGGGCTGGCTGAG

>40

ATCCCTTGATTCATCCCCTCCCCCTTCGCCGCCTACCCGCCCCGGGCTGTGGCTGCGG  
ATACCCGCGCCGTGGCAGGCGGGGGAGGGAAGAACAGAGAAGGATGCGGGCTGGC  
TGAGAGCGGTGGCAGGCTCCGGGCA

>41

CTGCGGATACCCGCGCCGTGGCAGGCGGGGGAGGGAAGAACAGAGAAGGATGCGG  
GCTGGCTGAGAGCGGTGGCAGGCTCCGGGCAACTCCGGCCCTGGGTCAGGGAGATTG  
CCTCCGACGCCCTGGCTTCCCAA

>42

GGAGGGAAGAACAGAGAAGGATGCGGGCTGGCTGAGAGCGGTGGCAGGCTCCGGGC  
AACTCCGGCCCTGGGTCAGGGAGATTGCCTCCGACGCCCTGGCTTCCCAAATGCC  
TTCACCCGTCGCGGGCCAGGACCAG

>43

CGGGCAACTCCGGCCCTGGGTGAGGGAGATTGCCTCCGACGCCCTGGCTTCCCAA



ATGCCTTACCCGTCGCGGGCCAGGACCAGGGGCGGAGCGCAGGTGTGCGGGGCG  
GAGAGCGTGAGCTCTGCGCGCGCGT

>44

CTCCGAGCCGCCCTGGCTTCCCAAATGCCTTACCCGTCGCGGGCCAGGACCAGGG  
GGCGGAGCGCAGGTGTGCGGGGCGGAGAGCGTGAGCTCTGCGCGCGCGTGACTGCG  
CCGGGCCCCCGGGGCAATGTGCGG

>45

CCGAGCCGCCCTGGCTTCCCAAATGCCTTACCCGTCGCGGGCCAGGACCAGGGG  
GCGGAGCGCAGGTGTGCGGGGCGGAGAGCGTGAGCTCTGCGCGCGCGTGACTGCGCC  
GGGCCCCCGGGGCAATGTGCGGCG

>46

TTCCCAAATGCCTTACCCGTCGCGGGCCAGGACCAGGGGGCGGAGCGCAGGTGTG  
CGGGGCGGAGAGCGTGAGCTCTGCGCGCGCGTGACTGCGCCGGGCCCCCGGGGCA  
ATGTGCGGCGCCGAGTTTGGGTCCGG

>47

GCGCAGGTGTGCGGGGCGGAGAGCGTGAGCTCTGCGCGCGCGTGACTGCGCCGGGCC  
CCCCGGGGCAATGTGCGGCGCCGAGTTTGGGTCCGGGTAGGGGACAGGCGGTCCGG  
CGTGGGTGTTGTCCACTGGTCTATCC

>48

GGGGCGGAGAGCGTGAGCTCTGCGCGCGCGTGACTGCGCCGGGCCCCCGGGGCAA  
TGTGCGGCGCCGAGTTTGGGTCCGGGTAGGGGACAGGCGGTCCGGCGTGGGTGTTGT  
CCACTGGTCTATCCGGTACGCCTGGC

>49

CGCGTGACTGCGCCGGGCCCCCGGGGCAATGTGCGGCGCCGAGTTTGGGTCCGGG  
TAGGGGACAGGCGGTCCGGCGTGGGTGTTGTCCACTGGTCTATCCGGTACGCCTGGCG  
CAGCTCCTGCCCTCAGATGCCCCGA

>50

GCCGGGCCCCCGGGGCAATGTGCGGCGCCGAGTTTGGGTCCGGGTAGGGGACAGG  
CGGTCCGGCGTGGGTGTTGTCCACTGGTCTATCCGGTACGCCTGGCGCAGCTCCTGCC  
CTCAGATGCCCCGACCGAGCGGAGA

>51

CGGGCCCCCGGGGCAATGTGCGGCGCCGAGTTTGGGTCCGGGTAGGGGACAGGCG  
GTCCGGCGTGGGTGTTGTCCACTGGTCTATCCGGTACGCCTGGCGCAGCTCCTGCCCTC  
AGATGCCCCGACCGAGCGGAGAGT

>52

GGGGCAATGTGCGGCGCCGAGTTTGGGTCCGGGTAGGGGACAGGCGGTCCGGCGTGG  
GTGTTGTCCACTGGTCTATCCGGTACGCCTGGCGCAGCTCCTGCCCTCAGATGCCCCGA  
CCGAGCGGAGAGTCAGGAATCTTC

>53

GTGTTGTCCACTGGTCTATCCGGTACGCCTGGCGCAGCTCCTGCCCTCAGATGCCCCGA  
CCGAGCGGAGAGTCAGGAATCTTCTCCGAGGGCTGGGGGAAGCCGGCTTCCGCACC  
TTTGAGGGACGGAGTGGCGGGATC

>54

CCGAGCGGAGAGTCAGGAATCTTCTCCGAGGGCTGGGGGAAGCCGGCTTCCGCACC  
TTTGAGGGACGGAGTGGCGGGATCTTCGAGCTTCTAGAGAAGTGACCACGGCCTG  
CGCCCGTTTGGGGCAAGCGGCTGGA

>55

GGCTGGGGGAAGCCGGCTTTCCGCACCTTTGAGGGACGGAGTGGCGGGATCTTCGGA  
GCTTCTAGAGAAGTGACCACGGCCTGCGCCCGTTTGGGGCAAGCGGCTGGATGGG  
ATGGCTCGGCTTCCCGAGGATCTGAC

>56

CCGCACCTTTGAGGGACGGAGTGGCGGGATCTTCGGAGCTTCTAGAGAAGTGACCA  
CGGCCTGCGCCCGTTTGGGGCAAGCGGCTGGATGGGATGGCTCGGCTTCCCGAGGAT  
CTGACCCCGCGCCGGAGACAAATGG

>57

CTCGGCTTCCCGAGGATCTGACCCCGGCCGGAGACAAATGGCCCTCGCATCCTAGGA  
GCTATGCTGCCAGTTCCTGCCAACCCGGGACGCTCAAAGCCCCAGATACCGGGAGA  
GCTGAGCCGGGCGAGGGGCGGAGC

>58

ACCCGGGACGCTCAAAGCCCCAGATACCGGGAGAGCTGAGCCGGGCGAGGGGCGGA  
GCTCCCTGGGGGCGTGGCCTGGGTGTGGATGGAGGCGGGGCCGCAACGCCAGTTC  
CGCAGAGGCCGGCTACTTGCTTGCACA

>59

GCTCAAAGCCCCAGATACCGGGAGAGCTGAGCCGGGCGAGGGGCGGAGCTCCCTGG  
GGGCGTGGCCTGGGTGTGGATGGAGGCGGGGCCGCAACGCCAGTTCGCGAGAGGCC  
GGCTACTTGCTTGCAGCAGCACGACG

>60

GCCGGGCGAGGGGCGGAGCTCCCTGGGGGCGTGGCCTGGGTGTGGATGGAGGCGG  
GGCCGCAACGCCAGTTCGCGAGAGGCCGGCTACTTGCTTGCAGCAGCACGACGGCC  
GGGGAGGGGCTGGCGGGCGCCGCGGGC

>61

CGGCTACTTGCTTGCAGCAGCACGACGCGCCGGGGAGGGGCTGGCGGGCGCCGCGGGC  
GGCGGGCGGGAGTGCAGGGGCTGCTCCCGCCGGCACCATGGCCAAGACCGTGGC  
CTATTTCTACGACCCCGACGTGGGCA

>62

CTGGCGGCGGCCGCGGGCGGGCGGCGGAGTCGCGGGCCTGCTCCCGCCGGCAC  
CATGGCCAAGACCGTGGCCTATTTCTACGACCCCGACGTGGGCAACTTCCACTACGGT  
GAGGAAACAGGGCTATGCATGAGGG

>63

CGGCGGAGTCGCGGGGCTGCTCCCGCCGGCACCATGGCCAAGACCGTGGCCTATTT  
TACGACCCCGACGTGGGCAACTTCCACTACGGTGAGGAAACAGGGCTATGCATGAGG  
GGTTGGGACACGGAGGTTTTGAGGC

>64

GTGGCCTATTTCTACGACCCCGACGTGGGCAACTTCCACTACGGTGAGGAAACAGGGC  
TATGCATGAGGGGTTGGGACACGGAGTTTTGAGGCGGGGTTGCAACTCCAGGGGTG  
AGAGCTGACGAACTCTTTCTCCCC

>65

CGACCCCGACGTGGGCAACTTCCACTACGGTGAGGAAACAGGGCTATGCATGAGGGG  
TTGGGACACGGAGGTTTTGAGGCGGGGTTGCAACTCCAGGGGTGAGAGCTGACGAAC  
TCTTTCTCCCCACCCCGAGGAGCTG

>66

GGCAACTTCCACTACGGTGAGGAAACAGGGCTATGCATGAGGGGTTGGGACACGGAG

GTTTTGAGGCGGGGTTGCAACTCCAGGGGTGAGAGCTGACGAACTCTTTCTCCCCAC  
CCCCAGGAGCTGGACACCCTATGAA

>67

GGTGAGGAAACAGGGCTATGCATGAGGGGTTGGGACACGGAGTTTTGAGGCGGGGT  
TGCAACTCCAGGGGTGAGAGCTGACGAACTCTTTCTCCCCACCCCAGGAGCTGGA  
CACCTATGAAGCCTCATCGCCTGGC

>68

TCTTTCTCCCCACCCCAGGAGCTGGACACCCTATGAAGCCTCATCGCCTGGCATTGA  
CCCATAGCCTGGTCTGCATTACGGTCTCTATAAGAAGATGATCGTGAGTTCCGCCGCC  
TCGGCCGGGGGTTGGGGGGTGG

>69

CCCCAGGAGCTGGACACCCTATGAAGCCTCATCGCCTGGCATTGACCCATAGCCTGG  
TCCTGCATTACGGTCTCTATAAGAAGATGATCGTGAGTTCCGCCGCCCTCGGCCGGGGT  
TGGGGGGTGGGGCGAGCTGTGGC

>70

CCTGGTCTGCATTACGGTCTCTATAAGAAGATGATCGTGAGTTCCGCCGCCCTCGGCCG  
GGGGTTGGGGGGTGGGGCGAGCTGTGGCCGTAGGGATAGGTGGGCTGGACTGAGTGC  
ATGAAGTGCACCCGCCCTAGAG

>71

TTACGGTCTCTATAAGAAGATGATCGTGAGTTCCGCCGCCCTCGGCCGGGGGTTGGGGG  
GTGGGGCGAGCTGTGGCCGTAGGGATAGGTGGGCTGGACTGAGTGCATGAAGTGCGA  
CCCGCCCTAGAGTATCGGGGAGCT

>72

AAGATGATCGTGAGTTCCGCCGCCCTCGGCCGGGGGTTGGGGGTGGGGCGAGCTGTG  
GCCGTAGGGATAGGTGGGCTGGACTGAGTGCATGAAGTGCACCCGCCCTAGAGTAT  
CGGGGAGCTGGATAGAAGTCACCAG

>73

GGTGGGGCGAGCTGTGGCCGTAGGGATAGGTGGGCTGGACTGAGTGCATGAAGTGC  
ACCCGCCCTAGAGTATCGGGGAGCTGGATAGAAGTCACCAGGAGTACCTTGAAAGTG  
CAGGGTGTGGGGGTGGCGTCTCT

>74

AGGGATAGGTGGGCTGGACTGAGTGCATGAAGTGCACCCGCCCTAGAGTATCGGGG  
AGCTGGATAGAAGTCACCAGGAGTACCTTGAAAGTGCAGGGTGTGGGGGTGGCGTC  
CTCTGCTTAATGGAAAGTACTTTCT

>75

AGTGCATGAAGTGCACCCGCCCTAGAGTATCGGGGAGCTGGATAGAAGTCACCAGG  
AGTACCTTGAAAGTGCAGGGTGTGGGGGTGGCGTCTCTGCTTAATGGAAAGTACTT  
TCTCACCTCAGGTCGGCCACCCTC

>76

GAAGTGCACCCGCCCTAGAGTATCGGGGAGCTGGATAGAAGTCACCAGGAGTACCT  
TGAAAGTGCAGGGTGTGGGGGTGGCGTCTCTGCTTAATGGAAAGTACTTTCTCACC  
TCAGGTCGGCCACCCTCTGACTGT

>77

AGTGCACCCGCCCTAGAGTATCGGGGAGCTGGATAGAAGTCACCAGGAGTACCTTG  
AAAGTGCAGGGTGTGGGGGTGGCGTCTCTGCTTAATGGAAAGTACTTTCTCACCTC  
AGGTCGGCCACCCTCTGACTGTAG

>78

CCCGCCCCTAGAGTATCGGGGAGCTGGATAGAAGTCACCAGGAGTACCTTGAAAGTGC  
AGGGTGTGGGGGTGGCGTCCTCTGCTTAATGGAAAGTACTTTCTCACCTCAGGTCGG  
CCACCCTCTGACTGTAGGCACACT

>79

TGGATAGAAGTCACCAGGAGTACCTTGAAAGTGCAGGGTGTGGGGGTGGCGTCCTCT  
GCTTAATGGAAAGTACTTTCTCACCTCAGGTCGGCCACCCTCTGACTGTAGGCACACTA  
GCCCTTGGCCTAGGGTTAGCGTG

>80

GGGTGTGGGGGTGGCGTCCTCTGCTTAATGGAAAGTACTTTCTCACCTCAGGTCGGC  
CACCTCTGACTGTAGGCACACTAGCCCTTGGCCTAGGGTTAGCGTGATGTGGGGCTG  
GTTTGAAGACAGAAGGTGTGTTCC

>81

TAATGGAAAGTACTTTCTCACCTCAGGTCGGCCACCCTCTGACTGTAGGCACACTAGC  
CCTTGGCCTAGGGTTAGCGTGATGTGGGGCTGTTTGAAGACAGAAGGTGTGTTCTC  
CTCTGCATTTTAGAGTGTGGATAG

>82

CCTCTGACTGTAGGCACACTAGCCCTTGGCCTAGGGTTAGCGTGATGTGGGGCTGTTT  
GAAGACAGAAGGTGTGTTCTCCTCTGCATTTAGAGTGTGGATAGGGCCTTGGCCTC  
AGGAATTAGGGTTAGGGGAGCGG

>83

TCTGACTGTAGGCACACTAGCCCTTGGCCTAGGGTTAGCGTGATGTGGGGCTGTTTG  
AAGACAGAAGGTGTGTTCTCCTCTGCATTTAGAGTGTGGATAGGGCCTTGGCCTCA  
GGAATTAGGGTTAGGGGAGCGGAT

>84

TTGGCCTAGGGTTAGCGTGATGTGGGGCTGTTTGAAGACAGAAGGTGTGTTCTCCT  
CTGCATTTTAGAGTGTGGATAGGGCCTTGGCCTCAGGAATTAGGGTTAGGGGAGCGGAT  
ATCACTGTATCAGGGTGTGAGGT

>85

TTGAAGACAGAAGGTGTGTTCTCCTCTGCATTTAGAGTGTGGATAGGGCCTTGGCCT  
CAGGAATTAGGGTTAGGGGAGCGGATATCACTGTATCAGGGTGTGAGGTTTACCCTCA  
GTTCCCACTCCTCTTTTACCACC

>86

CTCCTCTGCATTTTAGAGTGTGGATAGGGCCTTGGCCTCAGGAATTAGGGTTAGGGGAG  
CGGATATCACTGTATCAGGGTGTGAGGTTTACCCTCAGTCCCACTCCTCTTTTACCACC  
TTTCTTTACCTCCAAGGAGCT

>87

GAGTGTGGATAGGGCCTTGGCCTCAGGAATTAGGGTTAGGGGAGCGGATATCACTGTAT  
CAGGGTGTGAGGTTTACCCTCAGTCCCACTCCTCTTTTACCACCTTTCTTTACCTCCA  
AGGAGCTAGGGCTCCAGGGTGG

>88

TGAGGTTTACCCTCAGTCCCACTCCTCTTTTACCACCTTTCTTTACCTCCAAGGAGCTA  
GGGCTCCAGGGTGAACGATGCTGCCGTCTTTGTAAATGTGTATGTGCGTGTGGAACA  
GAGGCGATATTTAGATATTCC

>89

TTCCCACTCCTCTTTTACCACCTTTCTTTACCTCCAAGGAGCTAGGGCTCCAGGGTGGGA

ACGATGCTGCCGTCTTTGTAAATGTGTATGTGCGTGTGGAACAGAGGCGATATTTAGA  
TATTCCTTTTTTCAGCCTGGAAT

>90

CTCCTCTTTTACCACCTTTCTTTACCTCCAAGGAGCTAGGGCTCCAGGGTGGAAACGATG  
CTGCCGTCTTTGTAAATGTGTATGTGCGTGTGGAACAGAGGCGATATTTAGATATTCCT  
TTTTCAGCCTGGAATACCTCT

>91

CACCTTTCTTTACCTCCAAGGAGCTAGGGCTCCAGGGTGGAAACGATGCTGCCGTCTTT  
GTAAATGTGTATGTGCGTGTGGAACAGAGGCGATATTTAGATATTCCTTTTTTCAGCCTG  
GAATACCTCTACATGGTTCTGC

>92

TGTGTATGTGCGTGTGGAACAGAGGCGATATTTAGATATTCCTTTTTTCAGCCTGGAATA  
CCTCTACATGGTTCTGCTTAATCGCTATCCAGTTTTTCATCTACCAGACATACACATGCT  
GTCTTCCCAGCTTGGAATTT

>93

GAGGCGATATTTAGATATTCCTTTTTTCAGCCTGGAATACCTCTACATGGTTCTGCTTAAT  
CGCTATCCAGTTTTTCATCTACCAGACATACACATGCTGTCTTCCCAGCTTGGAATTTAT  
GGCTGTGATATGGGATAGT

>94

GCCTGGAATACCTCTACATGGTTCTGCTTAATCGCTATCCAGTTTTTCATCTACCAGACA  
TACACATGCTGTCTTCCCAGCTTGGAATTTATGGCTGTGATATGGGATAGTAACAGTTAA  
GCCACGCCAGGCGTGGTGGC

>95

CTTAATCGCTATCCAGTTTTTCATCTACCAGACATACACATGCTGTCTTCCCAGCTTGGA  
ATTTATGGCTGTGATATGGGATAGTAACAGTTAAGCCACGCCAGGCGTGGTGGCCCATG  
CCTGTAATCCCAGCACTTTGG

>96

TTCATCTACCAGACATACACATGCTGTCTTCCCAGCTTGGAATTTATGGCTGTGATATGG  
GATAGTAACAGTTAAGCCACGCCAGGCGTGGTGGCCCATGCCTGTAATCCCAGCACTT  
TGGGAGGTTGAAATGGGGGGGA

>97

CACATGCTGTCTTCCCAGCTTGGAATTTATGGCTGTGATATGGGATAGTAACAGTTAAGC  
CACGCCAGGCGTGGTGGCCCATGCCTGTAATCCCAGCACTTTGGGAGGTTGAAATGGG  
GGGGATCGCTTGAGGCCAGGAG

>98

AGCTTGGAAATTTATGGCTGTGATATGGGATAGTAACAGTTAAGCCACGCCAGGCGTGGT  
GGCCCATGCCTGTAATCCCAGCACTTTGGGAGGTTGAAATGGGGGGGATCGCTTGAGG  
CCAGGAGTTGGAGACCAGCTTGG

>99

CGTGGTGGCCCATGCCTGTAATCCCAGCACTTTGGGAGGTTGAAATGGGGGGGATCGC  
TTGAGGCCAGGAGTTGGAGACCAGCTTGGGCCACAGTGGGACCCACATCTACAAAAA  
ATAAAAAATAAAAAAAGTAGCCATGT

>100

CCAGCACTTTGGGAGGTTGAAATGGGGGGGATCGCTTGAGGCCAGGAGTTGGAGACC  
AGCTTGGGCCACAGTGGGACCCACATCTACAAAAAATAAAAAAATAAAAAAAGTAGCCAT  
GTGCGGTGGGTGTGCCTGTAGTCCC

>101

GAGGCCAGGAGTTGGAGACCAGCTTGGGCCACAGTGGGACCCACATCTACAAAAAAT  
AAAAATAAAAAAAGTAGCCATGTGCGGTGGGTGTGCCTGTAGTCCCACTACTTGGGA  
GGCCGAGGCGAGAGGATGGCTTGGG

>102

GAGTTGGAGACCAGCTTGGGCCACAGTGGGACCCACATCTACAAAAATAAAAAATA  
AAAAAGTAGCCATGTGCGGTGGGTGTGCCTGTAGTCCCACTACTTGGGAGGCCGAGG  
CGAGAGGATGGCTTGGGCCAGGAG

>103

TGTGCGGTGGGTGTGCCTGTAGTCCCACTACTTGGGAGGCCGAGGCGAGAGGATGG  
CTTGGGCCAGGAGTTAAAGTTACAGTGATCTATGATCAGCAGCCTGAGTTGACAGG  
GAGGACCTTGTCTCAAAGAAAAA

>104

TGGGTGTGCCTGTAGTCCCACTACTTGGGAGGCCGAGGCGAGAGGATGGCTTGGGC  
CCAGGAGTTAAAGTTACAGTGATCTATGATCAGCAGCCTGAGTTGACAGGGAGGACC  
TTGTCTCAAAGAAAAATAAGACA

>105

TGCCTGTAGTCCCACTACTTGGGAGGCCGAGGCGAGAGGATGGCTTGGGCCAGGA  
GTTAAAGTTACAGTGATCTATGATCAGCAGCCTGAGTTGACAGGGAGGACCTTGTCT  
AAAAGAAAAATAAGACAAAACAG

>106

GAGGCCGAGGCGAGAGGATGGCTTGGGCCAGGAGTTAAAGTTACAGTGATCTATGA  
TCAGCAGCCTGAGTTGACAGGGAGGACCTTGTCTCAAAGAAAAATAAGACAAAAC  
AGCTAAACCCAGGCTTTATGTGTTG

>107

TGGCTTGGGCCAGGAGTTAAAGTTACAGTGATCTATGATCAGCAGCCTGAGTTGAC  
AGGGAGGACCTTGTCTCAAAGAAAAATAAGACAAAACAGCTAAACCCAGGCTTTA  
TGTGTTGCTAGGGAACTAGTGAAC

>108

GCCTGAGTTGACAGGGAGGACCTTGTCTCAAAGAAAAATAAGACAAAACAGCTAA  
ACCCAGGCTTTATGTGTTGCTAGGGAACTAGTGAACAATATGAATGAATGTTATTGC  
TTGTGCCAAGGCACAGACAAATGG

>109

CTGAGTTGACAGGGAGGACCTTGTCTCAAAGAAAAATAAGACAAAACAGCTAAAC  
CCAGGCTTTATGTGTTGCTAGGGAACTAGTGAACAATATGAATGAATGTTATTGCTT  
GTGCCAAGGCACAGACAAATGGAC

>110

AAATAAGACAAAACAGCTAAACCCAGGCTTTATGTGTTGCTAGGGAACTAGTGAACA  
ATATGAATGAATGTTATTGCTTGTGCCAAGGCACAGACAAATGGACTGGTCATAGAAA  
AGACTGAGGTGATGTTAGTGCAG

>111

AACAGCTAAACCCAGGCTTTATGTGTTGCTAGGGAACTAGTGAACAATATGAATGAAT  
GTTATTGCTTGTGCCAAGGCACAGACAAATGGACTGGTCATAGAAAAGACTGAGGTG  
ATGTTAGTGCAGGAATCTATATC

>112

TGCTAGGGAACTAGTGAACAATATGAATGAATGTTATTGCTTGTGCCAAGGCACAG

ACAAATGGACTGGTCATAGAAAAGACTGAGGTGATGTTAGTGCAGGAATCTATATCCCT  
TGAGATTGTTTGCCTGTATGTAC

>113

ACAATATGAATGAATGTTTCATTGCTTGTGCCAAGGCACAGACAAATGGACTGGTCATAG  
AAAAGACTGAGGTGATGTTAGTGCAGGAATCTATATCCCTTGAGATTGTTTGCCTGTAT  
GTACCTGTGTGCATTTTCTGGG

>114

ATGAATGAATGTTTCATTGCTTGTGCCAAGGCACAGACAAATGGACTGGTCATAGAAAA  
GACTGAGGTGATGTTAGTGCAGGAATCTATATCCCTTGAGATTGTTTGCCTGTATGTACC  
TGTGTGCATTTTCTGGGAGAAG

>115

ATGAATGTTTCATTGCTTGTGCCAAGGCACAGACAAATGGACTGGTCATAGAAAAGACT  
GAGGTGATGTTAGTGCAGGAATCTATATCCCTTGAGATTGTTTGCCTGTATGTACCTGTG  
TGCATTTTCTGGGAGAAGAAAA

>116

ACAGACAAATGGACTGGTCATAGAAAAGACTGAGGTGATGTTAGTGCAGGAATCTATA  
TCCCTTGAGATTGTTTGCCTGTATGTACCTGTGTGCATTTTCTGGGAGAAGAAAAGCTC  
TTTCTTGTGCAGTTTTCAAAGAG

>117

CATAGAAAAGACTGAGGTGATGTTAGTGCAGGAATCTATATCCCTTGAGATTGTTTGCC  
TGATGTACCTGTGTGCATTTTCTGGGAGAAGAAAAGCTCTTTCTTGTGCAGTTTTCAA  
AGAGGTGTGACACATCCCCCTG

>118

CTATATCCCTTGAGATTGTTTGCCTGTATGTACCTGTGTGCATTTTCTGGGAGAAGAAAA  
GCTCTTTCTTGTGCAGTTTTCAAAGAGGTGTGACACATCCCCCTGACCTTCAAAGATA  
ATAAATCTTTGATTTTAATTA

>119

TCCCTTGAGATTGTTTGCCTGTATGTACCTGTGTGCATTTTCTGGGAGAAGAAAAGCTC  
TTTCTTGTGCAGTTTTCAAAGAGGTGTGACACATCCCCCTGACCTTCAAAGATAATAA  
ATCTTTGATTTTAATTAGAAAAG

>120

AGTTTTCAAAGAGGTGTGACACATCCCCCTGACCTTCAAAGATAATAAATCTTTGATT  
TTAATTAGAAAAGTTGACATATATCCCATATATTTGATCCAGAAAAGAAGATCCAGAGGAA  
AGAGGACAGAATCAGAGCTTGG

>121

AGAATCAGAGCTTGGGGAGGAGATGAGCATGGAGAGAAGTGGGAATAGGAGATTCCA  
AGGAACAGGGCAGGTGGATCAGGGCTCAAAGTTGAGAAGGTACGATAGGCTGAGCTG  
GAGGTGGAAAGGAAAAGAAGTGGTCT

>122

AGGAGATGAGCATGGAGAGAACTGGGAATAGGAGATTCCAAGGAACAGGGCAGGTGG  
ATCAGGGCTCAAAGTTGAGAAGGTACGATAGGCTGAGCTGGAGGTGGAAAGGAAAAG  
AAGTGGTCTTCAGGGGGCTCATTTGT

>123

GCATGGAGAGAAGTGGGAATAGGAGATTCCAAGGAACAGGGCAGGTGGATCAGGGCT  
CAAAGTTGAGAAGGTACGATAGGCTGAGCTGGAGGTGGAAAGGAAAAGAAGTGGTCT  
TCAGGGGGCTCATTTGTAATAACTTA

>124

GGAGATTCCAAGGAACAGGGCAGGTGGATCAGGGCTCAAAGTTGAGAAGGTACGATA  
GGCTGAGCTGGAGGTGGAAAGGAAAAGAAGTGGTCTTCAGGGGGCTCATTTGTAATA  
ACTTACCTGGTTAATCGGAGTCTCTC

>125

AAGTTGAGAAGGTACGATAGGCTGAGCTGGAGGTGGAAAGGAAAAGAAGTGGTCTTC  
AGGGGGCTCATTTGTAATAACTTACCTGGTTAATCGGAGTCTCTCTACTGACTTAAGGA  
TTGTGGGATGAGGGGAATGCTATG

>126

GATAGGCTGAGCTGGAGGTGGAAAGGAAAAGAAGTGGTCTTCAGGGGGCTCATTTGT  
AATAACTTACCTGGTTAATCGGAGTCTCTCTACTGACTTAAGGATTGTGGGATGAGGGG  
AATGCTATGTTTGGCTTCATATAG

>127

GTGGTCTTCAGGGGGCTCATTTGTAATAACTTACCTGGTTAATCGGAGTCTCTCTACTG  
ACTTAAGGATTGTGGGATGAGGGGAATGCTATGTTTGGCTTCATATAGTCTCCAGGACT  
GGTTCAGTATGGGTGGTCTGAG

>128

TGTAATAACTTACCTGGTTAATCGGAGTCTCTCTACTGACTTAAGGATTGTGGGATGAG  
GGGAATGCTATGTTTGGCTTCATATAGTCTCCAGGACTGGTTCAGTATGGGTGGTCTGA  
GCCTGTGGAGTGGGGCTGACCC

>129

GGTTAATCGGAGTCTCTCTACTGACTTAAGGATTGTGGGATGAGGGGAATGCTATGTTT  
GGCTTCATATAGTCTCCAGGACTGGTTCAGTATGGGTGGTCTGAGCCTGTGGAGTGGG  
GCTGACCCTGCCTGGGTTTCATCT

>130

CTTAAGGATTGTGGGATGAGGGGAATGCTATGTTTGGCTTCATATAGTCTCCAGGACTG  
GTTCAGTATGGGTGGTCTGAGCCTGTGGAGTGGGGCTGACCCTGCCTGGGTTTCATCTT  
GTGTATCCATCCCGAGGTCTTCA

>131

AAGGATTGTGGGATGAGGGGAATGCTATGTTTGGCTTCATATAGTCTCCAGGACTGGTT  
CAGTATGGGTGGTCTGAGCCTGTGGAGTGGGGCTGACCCTGCCTGGGTTTCATCTTGTG  
TATCCATCCCGAGGTCTTCAAGC

>132

GGATGAGGGGAATGCTATGTTTGGCTTCATATAGTCTCCAGGACTGGTTCAGTATGGGT  
GGTCTGAGCCTGTGGAGTGGGGCTGACCCTGCCTGGGTTTCATCTTGTGTATCCATCCCG  
AGGTCTTCAAGCCATACCAGGC

>133

TTCATATAGTCTCCAGGACTGGTTCAGTATGGGTGGTCTGAGCCTGTGGAGTGGGGCTG  
ACCCTGCCTGGGTTTCATCTTGTGTATCCATCCCGAGGTCTTCAAGCCATACCAGGCCTC  
CCAGCATGACATGTGCCGCTTC

>134

AGTATGGGTGGTCTGAGCCTGTGGAGTGGGGCTGACCCTGCCTGGGTTTCATCTTGTGTA  
TCCATCCCGAGGTCTTCAAGCCATACCAGGCCTCCAGCATGACATGTGCCGCTTCCAC  
TCCGAGGACTACATTGACTTCC

>135

CCCTGCCTGGGTTTCATCTTGTGTATCCATCCCGAGGTCTTCAAGCCATACCAGGCCTCC



CAGCATGACATGTGCCGCTTCCACTCCGAGGACTACATTGACTTCCTGCAGAGAGTCA  
GCCCCACCAATATGCAAGGCTTC

>136

GCCATACCAGGCCTCCCAGCATGACATGTGCCGCTTCCACTCCGAGGACTACATTGACT  
TCCTGCAGAGAGTCAGCCCCACCAATATGCAAGGCTTCACCAAGAGTCTTAATGCCTT  
CAACGTAGGCGATGACTGGTGAG

>137

TTCCACTCCGAGGACTACATTGACTTCCTGCAGAGAGTCAGCCCCACCAATATGCAAG  
GCTTCACCAAGAGTCTTAATGCCTTCAACGTAGGCGATGACTGGTGAGGGAGGACTGG  
GAGTTTTGATGTCTAACAGTTAA

>138

CATTGACTTCCTGCAGAGAGTCAGCCCCACCAATATGCAAGGCTTCACCAAGAGTCTT  
AATGCCTTCAACGTAGGCGATGACTGGTGAGGGAGGACTGGGAGTTTTGATGTCTAAC  
AGTTAATGCCAAGCCCTTCAGTG

>139

AATATGCAAGGCTTCACCAAGAGTCTTAATGCCTTCAACGTAGGCGATGACTGGTGAG  
GGAGGACTGGGAGTTTTGATGTCTAACAGTTAATGCCAAGCCCTTCAGTGAGGTCTT  
TTGGCAGCAGTGGGAAGATCTCAA

>140

CCAAGAGTCTTAATGCCTTCAACGTAGGCGATGACTGGTGAGGGAGGACTGGGAGTTT  
TGATGTCTAACAGTTAATGCCAAGCCCTTCAGTGAGGTCTTTTGGCAGCAGTGGGAA  
GATCTCAAGGGGGGCCTACTTGTC

>141

AACGTAGGCGATGACTGGTGAGGGAGGACTGGGAGTTTTGATGTCTAACAGTTAATG  
CCAAGCCCTTCAGTGAGGTCTTTTGGCAGCAGTGGGAAGATCTCAAGGGGGGCCTACT  
TGTC AATGCATCATAATTCATTTT

>142

AGGCGATGACTGGTGAGGGAGGACTGGGAGTTTTGATGTCTAACAGTTAATGCCAAG  
CCCTTCAGTGAGGTCTTTTGGCAGCAGTGGGAAGATCTCAAGGGGGGCCTACTTGTC  
ATGCATCATAATTCATTTTATTTG

>143

ACAGTTAATGCCAAGCCCTTCAGTGAGGTCTTTTGGCAGCAGTGGGAAGATCTCAAG  
GGGGGCCTACTTGTC AATGCATCATAATTCATTTTATTTGTTTATTCAATAAATATTTATTG  
GTC AACTTGTCTAGGCAGGC

>144

GGTCTTTTGGCAGCAGTGGGAAGATCTCAAGGGGGGCCTACTTGTC AATGCATCATAAT  
TCATTTTATTTGTTTATTCAATAAATATTTATTGGTCACTTGTCTAGGCAGGCCCTGTGC  
TAAGTGCTGGGAATGCAGTG

>145

ATCTCAAGGGGGGCCTACTTGTC AATGCATCATAATTCATTTTATTTGTTTATTCAATAAA  
TATTTATTGGTCACTTGTCTAGGCAGGCCCTGTGCTAAGTGCTGGGAATGCAGTGATG  
AACAAAAACAAAATTTAAT

>146

GGGGGGCCTACTTGTC AATGCATCATAATTCATTTTATTTGTTTATTCAATAAATATTTATT  
GGTCACTTGTCTAGGCAGGCCCTGTGCTAAGTGCTGGGAATGCAGTGATGAACAAAA  
ACAAAATTTAATATCGTAT

>147

AATGCATCATAATTCATTTTATTTGTTTATTCAATAAATATTTATTGGTCACTTGTTCTAGG  
CAGGCCCTGTGCTAAGTGCTGGGAATGCAGTGATGAACAAAAACAAAATTTAATATC  
GTATTTTGTCTAAGTCTTAT

>148

CATAATTCATTTTATTTGTTTATTCAATAAATATTTATTGGTCACTTGTTCTAGGCAGGCC  
TGTGCTAAGTGCTGGGAATGCAGTGATGAACAAAAACAAAATTTAATATCGTATTTT  
GCTAAGTCTTATAAAGAGG

>149

ACTTGTCTAGGCAGGCCCTGTGCTAAGTGCTGGGAATGCAGTGATGAACAAAAACAA  
AATTTAATATCGTATTTTGTCTAAGTCTTATAAAGAGGAGGTGTATGACAGATTATGAG  
AGTGTATACGTGGAGGATTGTT

>150

AGGCCCTGTGCTAAGTGCTGGGAATGCAGTGATGAACAAAAACAAAATTTAATATCG  
TATTTTGTCTAAGTCTTATAAAGAGGAGGTGTATGACAGATTATGAGAGTGTATACGTGG  
AGGATTGTTTAGCTTGGTGGAG

>151

GCTGGGAATGCAGTGATGAACAAAAACAAAATTTAATATCGTATTTTGTCTAAGTCTTA  
TAAAGAGGAGGTGTATGACAGATTATGAGAGTGTATACGTGGAGGATTGTTTAGCTTGG  
TGGAGTGGCTGGTCGGTGGGG

>152

AAAACAAAATTTAATATCGTATTTTGTCTAAGTCTTATAAAGAGGAGGTGTATGACAGA  
TTATGAGAGTGTATACGTGGAGGATTGTTTAGCTTGGTGGAGTGGCTGGTCGGTGGGG  
CCTTCCTAGAGGAAGTAAAGAT

>153

AAATTTAATATCGTATTTTGTCTAAGTCTTATAAAGAGGAGGTGTATGACAGATTATGA  
GAGTGTATACGTGGAGGATTGTTTAGCTTGGTGGAGTGGCTGGTCGGTGGGGCCTTCCT  
AGAGGAAGTAAAGATTGAGCT

>154

ATCGTATTTTGTCTAAGTCTTATAAAGAGGAGGTGTATGACAGATTATGAGAGTGTATAC  
GTGGAGGATTGTTAGCTTGGTGGAGTGGCTGGTCGGTGGGGCCTTCCTAGAGGAAGT  
AAAGATTGAGCTGAGATCTGAA

>155

AGTCTTATAAAGAGGAGGTGTATGACAGATTATGAGAGTGTATACGTGGAGGATTGTTT  
AGCTTGGTGGAGTGGCTGGTCGGTGGGGCCTTCCTAGAGGAAGTAAAGATTGAGCTG  
AGATCTGAAAAAAGAGTAGAAGTA

>156

ATGAGAGTGTATACGTGGAGGATTGTTTAGCTTGGTGGAGTGGCTGGTCGGTGGGGCC  
TTCCTAGAGGAAGTAAAGATTGAGCTGAGATCTGAAAAAAGAGTAGAAGTAATCAGAT  
GAAAGATGGTTGGAGGGTGAGGGG

>157

CTTGGTGGAGTGGCTGGTCGGTGGGGCCTTCCTAGAGGAAGTAAAGATTGAGCTGAGA  
TCTGAAAAAAGAGTAGAAGTAATCAGATGAAAGATGGTTGGAGGGTGAGGGGAGAAG  
TATAGCAGGCAGTAGGGACAAGTGC

>158

GGAGTGGCTGGTCGGTGGGGCCTTCCTAGAGGAAGTAAAGATTGAGCTGAGATCTGA

AAAAAGAGTAGAAGTAATCAGATGAAAGATGGTTGGAGGGTGAGGGGAGAAGTATAG  
CAGGCAGTAGGGACAAGTGCTAAGGG

>159

TAGAGGAAGTAAAGATTGAGCTGAGATCTGAAAAAAGAGTAGAAGTAATCAGATGAA  
AGATGGTTGGAGGGTGAGGGGAGAAGTATAGCAGGCAGTAGGGACAAGTGCTAAGGG  
TCTGTGGTAGGACTGAGTATGACTCA

>160

AGATTGAGCTGAGATCTGAAAAAAGAGTAGAAGTAATCAGATGAAAGATGGTTGGAG  
GGTGAGGGGAGAAGTATAGCAGGCAGTAGGGACAAGTGCTAAGGGTCTGTGGTAGGA  
CTGAGTATGACTCATTTGAGGAACAG

>161

GATCTGAAAAAAGAGTAGAAGTAATCAGATGAAAGATGGTTGGAGGGTGAGGGGAGA  
AGTATAGCAGGCAGTAGGGACAAGTGCTAAGGGTCTGTGGTAGGACTGAGTATGACTC  
ATTTGAGGAACAGAAAAAAGGCCAA

>162

AGATGAAAGATGGTTGGAGGGTGAGGGGAGAAGTATAGCAGGCAGTAGGGACAAGTG  
CTAAGGGTCTGTGGTAGGACTGAGTATGACTCATTTGAGGAACAGAAAAAAGGCCAA  
GTGCAGAGTATGAAGAGGAGGTGAAC

>163

TGGTTGGAGGGTGAGGGGAGAAGTATAGCAGGCAGTAGGGACAAGTGCTAAGGGTCT  
GTGGTAGGACTGAGTATGACTCATTTGAGGAACAGAAAAAAGGCCAAGTGCAGAGTA  
TGAAGAGGAGGTGAACTGAATTGAGG

>164

GTAGGGACAAGTGCTAAGGGTCTGTGGTAGGACTGAGTATGACTCATTTGAGGAACAG  
AAAAAAGGCCAAGTGCAGAGTATGAAGAGGAGGTGAACTGAATTGAGGCTAAAGAAA  
TAGGACCTTTTAAAAGCAAACAGCT

>165

CAAGTGCTAAGGGTCTGTGGTAGGACTGAGTATGACTCATTTGAGGAACAGAAAAAA  
GGCCAAGTGCAGAGTATGAAGAGGAGGTGAACTGAATTGAGGCTAAAGAAATAGGAC  
CTTTTAAAAGCAAACAGCTCTATTAT

>166

AGGAGGTGAACTGAATTGAGGCTAAAGAAATAGGACCTTTTAAAAGCAAACAGCTCTA  
TTATGAATTGGGGTTTTTACCCGTAGAGTATAGGGAAGCTATCAAAGTGTTTTAAAAG  
CAAGGGATCTTAAGAGGGCTATG

>167

CTGAATTGAGGCTAAAGAAATAGGACCTTTTAAAAGCAAACAGCTCTATTATGAATTGG  
GGTTTTTACCCGTAGAGTATAGGGAAGCTATCAAAGTGTTTTAAAAGCAAGGGATCTT  
AAGAGGGCTATGGGCAAGTTAA

>168

ACCTTTTAAAAGCAAACAGCTCTATTATGAATTGGGGTTTTTACCCGTAGAGTATAGGG  
AAGCTATCAAAGTGTTTTTAAAAGCAAGGGATCTTAAGAGGGCTATGGGCAAGTTAAA  
AAAACAAAAAAAACAACGAAGGA

>169

TACCCGTAGAGTATAGGGAAGCTATCAAAGTGTTTTTAAAAGCAAGGGATCTTAAGAG  
GGCTATGGGCAAGTTAAAAAAAACAAAAAAAACAACGAAGGAGTGTTTGATATCATT  
GGTTTACATTGAGCTTGTATCATC

>170

GTGTTTTAAAAAGCAAGGGATCTTAAGAGGGCTATGGGCAAGTTAAAAAACAAAA  
AAACAACGAAGGAGTGGTTTGATATCATTAGGTTTACATTGAGCTTGATCATCCATAG  
AAGAGTCAGGGTTAGACCCTCTGG

>171

GATCTTAAGAGGGCTATGGGCAAGTTAAAAAACAAAAAACGAAGGAGTGGT  
TTGATATCATTAGGTTTACATTGAGCTTGATCATCCATAGAAGAGTCAGGGTTAGACCC  
TCTGGGGAAGAGAGTGGACAACA

>172

ATGGGCAAGTTAAAAAACAAAAAACGAAGGAGTGGTTTGATATCATTAGGTT  
TACATTGAGCTTGATCATCCATAGAAGAGTCAGGGTTAGACCCTCTGGGGAAGAGAG  
TGGACAACAAAGATAAGCCACACT

>173

ACAAAAAACGAAGGAGTGGTTTGATATCATTAGGTTTACATTGAGCTTGATCA  
TCCATAGAAGAGTCAGGGTTAGACCCTCTGGGGAAGAGAGTGGACAACAAAGATAAG  
CCACACTCTACTCTATATCCATGA

>174

ATATCATTAGGTTTACATTGAGCTTGATCATCCATAGAAGAGTCAGGGTTAGACCCTCT  
GGGGAAGAGAGTGGACAACAAAGATAAGCCACACTCTACTCTATATCCATGAAAAAAT  
AGTAACCATCACAGCTACCAGT

>175

TTAGACCCTCTGGGGAAGAGAGTGGACAACAAAGATAAGCCACACTCTACTCTATATC  
CATGAAAAAATAGTAACCATCACAGCTACCAGTTGCTCAATTCTACTACTTTTGT  
AACTTTTTATTAGGGAAAATT

>176

GAGTGGACAACAAAGATAAGCCACACTCTACTCTATATCCATGAAAAAATAGTAACCAT  
CACAGCTACCAGTTGCTCAATTCTACTACTTTTGT  
TTTAACTTTTTATTAGGGAAAA  
TTTCAAAAATTTCTGAAAGTG

>177

CACTCTACTCTATATCCATGAAAAAATAGTAACCATCACAGCTACCAGTTGCTCAATTCT  
ACTTACTTTTGT  
TTTTAACTTTTTATTAGGGAAAAATTTCAAAAATTTCTGAAAGTGAAG  
TAGTGCAGTGACCTCCATA

>178

CCAGTTGCTCAATTCTACTTACTTTTGT  
TTTTAACTTTTTATTAGGGAAAAATTTCAAAA  
ATTTCTGAAAGTGAAGTAGTGCAGTGACCTCCATACGTCCATCACCTAGCTTCAACGC  
TTATGAGCAAATGGCCACTCT

>179

TGCTCAATTCTACTTACTTTTGT  
TTTTAACTTTTTATTAGGGAAAAATTTCAAAAATTTCT  
GAAAGTGAAGTAGTGCAGTGACCTCCATACGTCCATCACCTAGCTTCAACGCTTATGA  
GCAAATGGCCACTCTTTTTT

>180

CCATCACCTAGCTTCAACGCTTATGAGCAAATGGCCACTCTTTTTTTTTTTTTTTTTTTT  
TGAGACAGAGTCTACTCTGTAGCCCAGGCTGGAGTGCAGTGGTGCAGTCTTGCTCA  
CTGCAACCTCTGCCTCCTGGG

>181

GCTTCAACGCTTATGAGCAAATGGCCACTCTTTTTTTTTTTTTTTTTTTTGGAGACAGA

GTCTCACTCTGTAGCCCAGGCTGGAGTGCAGTGGTGCAGTCTTGGCTCACTGCAACCT  
CTGCCTCCTGGGTTCAAGCGAT

>182

AGCAAATGGCCACTCTTTTTTTTTTTTTTTTTTTTTTTGAGACAGAGTCTCACTCTGTAGC  
CCAGGCTGGAGTGCAGTGGTGCAGTCTTGGCTCACTGCAACCTCTGCCTCCTGGGTT  
AAGCGATTCTCATGCCTCAGAC

>183

TCTTTTTTTTTTTTTTTTTTTTTTTGAGACAGAGTCTCACTCTGTAGCCCAGGCTGGAGTG  
CAGTGGTGCAGTCTTGGCTCACTGCAACCTCTGCCTCCTGGGTTCAAGCGATTCTCATG  
CCTCAGACTCCCGAGTAGCTG

>184

AGTCTCACTCTGTAGCCCAGGCTGGAGTGCAGTGGTGCAGTCTTGGCTCACTGCAACC  
TCTGCCTCCTGGGTTCAAGCGATTCTCATGCCTCAGACTCCCGAGTAGCTGGGATTACA  
GGCGCTGCCACCATGCCTGGCT

>185

TGGTGCAGTCTTGGCTCACTGCAACCTCTGCCTCCTGGGTTCAAGCGATTCTCATGCCT  
CAGACTCCCGAGTAGCTGGGATTACAGGCGCCTGCCACCATGCCTGGCTAATTTTTGTA  
TGTTTAGTAGAGATGGGGTTTC

>186

CGATTCTCATGCCTCAGACTCCCGAGTAGCTGGGATTACAGGCGCCTGCCACCATGCCT  
GGCTAATTTTTGTATGTTTAGTAGAGATGGGGTTTCACTATGTTGGTCAAGCTGGTTTTG  
AACTCCCGACCTCAGGTGATT

>187

TCTCATGCCTCAGACTCCCGAGTAGCTGGGATTACAGGCGCCTGCCACCATGCCTGGCT  
AATTTTTGTATGTTTAGTAGAGATGGGGTTTCACTATGTTGGTCAAGCTGGTTTTGAACT  
CCCGACCTCAGGTGATTCACC

>188

ATTACAGGCGCCTGCCACCATGCCTGGCTAATTTTTGTATGTTTAGTAGAGATGGGGTTT  
CACTATGTTGGTCAAGCTGGTTTTGAACTCCCGACCTCAGGTGATTCACCAGCCTCAGC  
CTCCAAAAGTGCTGGGATTAC

>189

GCCTGCCACCATGCCTGGCTAATTTTTGTATGTTTAGTAGAGATGGGGTTTCACTATGTT  
GGTCAAGCTGGTTTTGAACTCCCGACCTCAGGTGATTCACCAGCCTCAGCCTCCAAAA  
GTGCTGGGATTACAGACGTGAG

>190

ATTTTTGTATGTTTAGTAGAGATGGGGTTTCACTATGTTGGTCAAGCTGGTTTTGAACTC  
CCGACCTCAGGTGATTCACCAGCCTCAGCCTCCAAAAGTGCTGGGATTACAGACGTGA  
GCCATCGCACTCAGCTGAGCAA

>191

TTTCACTATGTTGGTCAAGCTGGTTTTGAACTCCCGACCTCAGGTGATTCACCAGCCTC  
AGCCTCCAAAAGTGCTGGGATTACAGACGTGAGCCATCGCACTCAGCTGAGCAAGTG  
GCCACTTTACTTCATCTATACTC

>192

AGCTGGTTTTGAACTCCCGACCTCAGGTGATTCACCAGCCTCAGCCTCCAAAAGTGCT  
GGGATTACAGACGTGAGCCATCGCACTCAGCTGAGCAAGTGCCACTTTACTTCATCT  
ATACTCCCTCATGTTAGATTGTT

>193

GTGATTCAACCAGCCTCAGCCTCCAAAAGTGCTGGGATTACAGACGTGAGCCATCGCAC  
TCAGCTGAGCAAGTGGCCACTTACTTCATCTATACTCCCTCATGTTAGATTGTTTTAA  
AGCAGATCCTAGATGTTATATC

>194

GGATTACAGACGTGAGCCATCGCACTCAGCTGAGCAAGTGGCCACTTACTTCATCTA  
TACTCCCTCATGTTAGATTGTTTTAAAGCAGATCCTAGATGTTATATCCTTTTATCCATAA  
ATATTTTATTATGTATCTCT

>195

GACGTGAGCCATCGCACTCAGCTGAGCAAGTGGCCACTTACTTCATCTATACTCCCT  
CATGTTAGATTGTTTTAAAGCAGATCCTAGATGTTATATCCTTTTATCCATAAATTTTTAT  
TATGTATCTCTAAATGATA

>196

CTGAGCAAGTGGCCACTTACTTCATCTATACTCCCTCATGTTAGATTGTTTTAAAGCA  
GATCCTAGATGTTATATCCTTTTATCCATAAATTTTTATTATGTATCTCTAAATGATACTCT  
TTTAAAAAAACATAGTA

>197

TCCCTCATGTTAGATTGTTTTAAAGCAGATCCTAGATGTTATATCCTTTTATCCATAAATAT  
TTTATTATGTATCTCTAAATGATACTCTTTTAAAAAAACATAGTATCATTATCAAACCTAA  
AAAGTTAACAGTGATTC

>198

GATGTTATATCCTTTTATCCATAAATTTTTATTATGTATCTCTAAATGATACTCTTTTAAAA  
AAACATAGTATCATTATCAAACCTAAAAAGTTAACAGTGATTCCTTAATGTCATCAAATA  
TGGATCAATATTCAAAT

>199

AAATATTTTATTATGTATCTCTAAATGATACTCTTTTAAAAAAACATAGTATCATTATCAA  
ACCTAAAAAGTTAACAGTGATTCCTTAATGTCATCAAATATGGATCAATATTCAAATTTTC  
TGCAGTTGTCTCATAATTA

>200

TTATTATGTATCTCTAAATGATACTCTTTTAAAAAAACATAGTATCATTATCAAACCTAAA  
AAGTTAACAGTGATTCCTTAATGTCATCAAATATGGATCAATATTCAAATTTCTGCAGTT  
GTCTCATAATTATTTTGTA

>201

CTAAATGATACTCTTTTAAAAAAACATAGTATCATTATCAAACCTAAAAAGTTAACAGTG  
ATTCTTAATGTCATCAAATATGGATCAATATTCAAATTTCTGCAGTTGTCTCATAATTAT  
TTTGTAGCTAATTTAAATC

>202

TATCAAACCTAAAAAGTTAACAGTGATTCCTTAATGTCATCAAATATGGATCAATATTCA  
AATTTCTGCAGTTGTCTCATAATTATTTGTAGCTAATTTAAATCCAGATCTAAACAAGG  
TCTATACAGTGCATTTGGTT

>203

CAAACCTAAAAAGTTAACAGTGATTCCTTAATGTCATCAAATATGGATCAATATTCAAAT  
TTCTGCAGTTGTCTCATAATTATTTGTAGCTAATTTAAATCCAGATCTAAACAAGGTCTA  
TACAGTGCATTTGGTTGAT

>204

ACAGTGATTCCTTAATGTCATCAAATATGGATCAATATTCAAATTTCTGCAGTTGTCTCAT

AATTATTTGTAGCTAATTTAAATCCAGATCTAAACAAGGTCTATACAGTGCATTTGGTT  
GATATGTCTCTTAAGACTT

>205

ATCAATATTCAAATTTCTGCAGTTGTCTCATAATTATTTGTAGCTAATTTAAATCCAGAT  
CTAAACAAGGTCTATACAGTGCATTTGGTTGATATGTCTCTTAAGACTTTAATTTGTAG  
CTTTTCTGTCACCCCCTTG

>206

CAAATTTCTGCAGTTGTCTCATAATTATTTGTAGCTAATTTAAATCCAGATCTAAACAA  
GGTCTATACAGTGCATTTGGTTGATATGTCTCTTAAGACTTTAATTTGTAGCTTTTCTGT  
CACCCCCTTGAATTTATTT

>207

GCAGTTGTCTCATAATTATTTGTAGCTAATTTAAATCCAGATCTAAACAAGGTCTATAC  
AGTGCATTTGGTTGATATGTCTCTTAAGACTTTAATTTGTAGCTTTTCTGTCACCCCCTT  
GAATTTATTTCTTGAAGAA

>208

CTCATAATTATTTGTAGCTAATTTAAATCCAGATCTAAACAAGGTCTATACAGTGCATTT  
GGTTGATATGTCTCTTAAGACTTTAATTTGTAGCTTTTCTGTCACCCCCTTGAATTTATT  
TCTTGAAGAAACCAGTT

>209

ATTTAAATCCAGATCTAAACAAGGTCTATACAGTGCATTTGGTTGATATGTCTCTTAAGA  
CTTTAATTTGTAGCTTTTCTGTCACCCCCTTGAATTTATTTCTTGAAGAAACCAGTTG  
TTGATCCTGTAGAATTTCTT

>210

TATGTCTCTTAAGACTTTAATTTGTAGCTTTTCTGTCACCCCCTTGAATTTATTTCTTGA  
AGAAACCAGGTTGTTGATCCTGTAGAATTTCTTATGATAGCTACCATTTACTGAGTGCTT  
ACTCTGCTAGGTATTATGC

>211

GTCTCTTAAGACTTTAATTTGTAGCTTTTCTGTCACCCCCTTGAATTTATTTCTTGAAG  
AAACCAGGTTGTTGATCCTGTAGAATTTCTTATGATAGCTACCATTTACTGAGTGCTTAC  
TCTGCTAGGTATTATGCCAA

>212

TGAATTTATTTCTTGAAGAAACCAGGTTGTTGATCCTGTAGAATTTCTTATGATAGCTAC  
CATTTACTGAGTGCTTACTCTGCTAGGTATTATGCCAAGGGTTGCTGGTAAATCCACTTA  
ATTCTCATACCAATCCTTAG

>213

AGAAACCAGGTTGTTGATCCTGTAGAATTTCTTATGATAGCTACCATTTACTGAGTGCTT  
ACTCTGCTAGGTATTATGCCAAGGGTTGCTGGTAAATCCACTTAATTCTCATACCAATCC  
TTAGATGTATTATAATAGAC

>214

GTAGAATTTCTTATGATAGCTACCATTTACTGAGTGCTTACTCTGCTAGGTATTATGCCAA  
GGGTTGCTGGTAAATCCACTTAATTCTCATACCAATCCTTAGATGTATTATAATAGACCTT  
TTTCTGATGTTATATATA

>215

GCTTACTCTGCTAGGTATTATGCCAAGGGTTGCTGGTAAATCCACTTAATTCTCATACCA  
ATCCTTAGATGTATTATAATAGACCTTTTCTGATGTTATATATAAGTAAATTGAGGTTTG  
GGAATATCTAGGTAACCTA

>216

AGGGTTGCTGGTAAATCCACTTAATTCTCATACCAATCCTTAGATGTATTATAATAGACCT  
TTTTCTGATGTTATATATAAGTAAATTGAGGTTTGGGAATATCTAGGTAACCTAGCCGTAG  
TCACATAACTGGTCATTG

>217

TAAATCCACTTAATTCTCATACCAATCCTTAGATGTATTATAATAGACCTTTTTCTGATGTT  
ATATATAAGTAAATTGAGGTTTGGGAATATCTAGGTAACCTAGCCGTAGTCACATAACTG  
GTCATTGGAGGGGGCATG

>218

TAATTCTCATACCAATCCTTAGATGTATTATAATAGACCTTTTTCTGATGTTATATATAAGT  
AAATTGAGGTTTGGGAATATCTAGGTAACCTAGCCGTAGTCACATAACTGGTCATTGGA  
GGGGGCATGATCCAGATCC

>219

CCTTAGATGTATTATAATAGACCTTTTTCTGATGTTATATATAAGTAAATTGAGGTTTGGG  
AATATCTAGGTAACCTAGCCGTAGTCACATAACTGGTCATTGGAGGGGGCATGATCCAG  
ATCCCGGGTTTTTAAACCAC

>220

TTCTGATGTTATATATAAGTAAATTGAGGTTTGGGAATATCTAGGTAACCTAGCCGTAGT  
CACATAACTGGTCATTGGAGGGGGCATGATCCAGATCCCGGGTTTTTAAACCACTAATC  
TGTTTTCTGAAAGATCTTAA

>221

TGGGAATATCTAGGTAACCTAGCCGTAGTCACATAACTGGTCATTGGAGGGGGCATGAT  
CCAGATCCCGGGTTTTTAAACCACTAATCTGTTTTCTGAAAGATCTTAATGACAGAAG  
CAGCCAGGGCTGTAGGATAGAG

>222

TAGCCGTAGTCACATAACTGGTCATTGGAGGGGGCATGATCCAGATCCCGGGTTTTTAA  
ACCACTAATCTGTTTTCTGAAAGATCTTAATGACAGAAGCAGCCAGGGCTGTAGGATA  
GAGGCCAACTCATTAGGCTGGC

>223

CCAGATCCCGGGTTTTTAAACCACTAATCTGTTTTCTGAAAGATCTTAATGACAGAAG  
CAGCCAGGGCTGTAGGATAGAGGCCAACTCATTAGGCTGGCATTGGCACCTTTCCAAC  
TTTATCCCTACACCTCAGCTGCA

>224

TTCAAGGCCTTCTCAGCCTTCACACCATCTCCATGAAACCTTTCTTGACCACACCAGCC  
CATAGAGCTCTGTCTTGACACACTGCACTGCTCATTGGTGTTTCAGTCACATGCTGTT  
TGGGGAGGTTTCTGTTTTTTTT

>225

CTCCATGAAACCTTTCTTGACCACACCAGCCCATAGAGCTCTGTCTTGACACACTGCA  
CTGCTCATTGGTGTTTCAGTCACATGCTGTTTGGGGAGGTTTCTGTTTTTTTTGTTAGTA  
TTCCTGCTGTTATTTCTGAGC

>226

AAACCTTTCTTGACCACACCAGCCCATAGAGCTCTGTCTTGACACACTGCACTGCTCA  
TTTGGTGTTTCAGTCACATGCTGTTTGGGGAGGTTTCTGTTTTTTTTGTTAGTATTCCTGC  
TGTTATTTCTGAGCTCACTTT

>227

TGACCACACCAGCCCATAGAGCTCTGTCTTGACACACTGCACTGCTCATTGGTGTTT



AGTCACATGCTGTTTGGGGAGGTTTCTTGTTTTTTGTTAGTATTCTGCTGTTATTTCT  
GAGCTCACTTTCTAGCTCTGT

>228

AGCCCATAGAGCTCTGTCTTGCACACACTGCACTGCTCATTTGGTGTTCAGTCACATGC  
TGTTTGGGGAGGTTTCTTGTTTTTTGTTAGTATTCTGCTGTTATTTCTGAGCTCACTTT  
CTAGCTCTGTGAATACAGGG

>229

GTCTTGCACACACTGCACTGCTCATTTGGTGTTCAGTCACATGCTGTTTGGGGAGGTTT  
CTTGTTTTTTGTTAGTATTCTGCTGTTATTTCTGAGCTCACTTTCTAGCTCTGTGAATA  
CAGGGTCAGCCCTTACGCCA

>230

CTGTTTGGGGAGGTTTCTTGTTTTTTGTTAGTATTCTGCTGTTATTTCTGAGCTCACTT  
TCTAGCTCTGTGAATACAGGGTCAGCCCTTACGCCACACTGGGGTCCCGTAGATGCTCT  
TTGTGCGATTAGGGAATGCT

>231

GGTTTCTTGTTTTTTGTTAGTATTCTGCTGTTATTTCTGAGCTCACTTTCTAGCTCTGT  
GAATACAGGGTCAGCCCTTACGCCACACTGGGGTCCCGTAGATGCTCTTTGTGCGATTA  
GGGAATGCTAATTAGAATAC

>232

TTCCTGCTGTTATTTCTGAGCTCACTTTCTAGCTCTGTGAATACAGGGTCAGCCCTTACG  
CCACACTGGGGTCCCGTAGATGCTCTTTGTGCGATTAGGGAATGCTAATTAGAATACTAT  
CTCTGGGCTATTTATGCTGC

>233

AGCTCACTTTCTAGCTCTGTGAATACAGGGTCAGCCCTTACGCCACACTGGGGTCCCGT  
AGATGCTCTTTGTGCGATTAGGGAATGCTAATTAGAATACTATCTCTGGGCTATTTATGCT  
GCATCAGTCTTCTGTCAAA

>234

CGTAGATGCTCTTTGTGCGATTAGGGAATGCTAATTAGAATACTATCTCTGGGCTATTTAT  
GCTGCATCAGTCTTCTGTCAAACAAGTTACAGTTGTGCTTATCTGTATTTCCGATGAG  
AATCAGGAATTTTCTTCTG

>235

CTCTTTGTGCGATTAGGGAATGCTAATTAGAATACTATCTCTGGGCTATTTATGCTGCATC  
AGTCTTCTGTCAAACAAGTTACAGTTGTGCTTATCTGTATTTCCGATGAGAATCAGGA  
ATTTTTCTTCTGTTAATGA

>236

CGATTAGGGAATGCTAATTAGAATACTATCTCTGGGCTATTTATGCTGCATCAGTCTTCT  
GTCAAACAAGTTACAGTTGTGCTTATCTGTATTTCCGATGAGAATCAGGAATTTTCTTC  
TGTTAATGAATTTCTGAT

>237

AGTCTTCTGTCAAACAAGTTACAGTTGTGCTTATCTGTATTTCCGATGAGAATCAGGA  
ATTTTTCTTCTGTTAATGAATTTCTGATTGGTTTCAAAGTATTCTAACATAAGTAGCCAA  
ATTGACTATAGGCCTTTAA

>238

TACAGTTGTGCTTATCTGTATTTCCGATGAGAATCAGGAATTTTCTTCTGTTAATGAAT  
TTCTGATTGGTTTCAAAGTATTCTAACATAAGTAGCCAAATTGACTATAGGCCTTTAAA  
TGAAAAAATAAAAAAGTA

>239

TCCGATGAGAATCAGGAATTTTTCTTCTGTTTAATGAATTTCTGATTGGTTTCAAAGTAT  
TCTAACATAAGTAGCCAAATTGTAATAAGGCCTTTAAATGAAAAAATAAAAAAGTAG  
TCCCAAGCCGGGCGCAGTGGC

>240

TCAGGAATTTTTCTTCTGTTTAATGAATTTCTGATTGGTTTCAAAGTATTCTAACATAAGT  
AGCCAAATTGTAATAAGGCCTTTAAATGAAAAAATAAAAAAGTAGTCCCAAGCCGG  
GCGCAGTGGCTCACGCCTGTA

>241

TTGGTTTCAAAGTATTCTAACATAAGTAGCCAAATTGTAATAAGGCCTTTAAATGAAAA  
AAATAAAAAAGTAGTCCCAAGCCGGGCGCAGTGGCTCACGCCTGTAATCCAGCACTT  
TCGGAGGCCGAGGCGGGTGGAC

>242

CATAAGTAGCCAAATTGTAATAAGGCCTTTAAATGAAAAAATAAAAAAGTAGTCCCA  
AGCCGGGCGCAGTGGCTCACGCCTGTAATCCAGCACTTTCGGAGGCCGAGGCGGGT  
GGACCACCTAAGGTCAGGAGTTCA

>243

ATTGTAATAAGGCCTTTAAATGAAAAAATAAAAAAGTAGTCCCAAGCCGGGCGCAG  
TGGCTCACGCCTGTAATCCAGCACTTTCGGAGGCCGAGGCGGGTGGACCACCTAAGG  
TCAGGAGTTCAAGACCAGCCTGGC

>244

AAAAAAGTAGTCCCAAGCCGGGCGCAGTGGCTCACGCCTGTAATCCAGCACTTTCGG  
AGGCCGAGGCGGGTGGACCACCTAAGGTCAGGAGTTCAAGACCAGCCTGGCCAACAT  
GGTGAAACCCATCTCTACTAAAAA

>245

AAGCCGGGCGCAGTGGCTCACGCCTGTAATCCAGCACTTTCGGAGGCCGAGGCGGG  
TGGACCACCTAAGGTCAGGAGTTCAAGACCAGCCTGGCCAACATGGTGAAACCCAT  
CTCTACTAAAAATACAAAAATTAGTC

>246

GCGCAGTGGCTCACGCCTGTAATCCAGCACTTTCGGAGGCCGAGGCGGGTGGACCA  
CCTAAGGTCAGGAGTTCAAGACCAGCCTGGCCAACATGGTGAAACCCATCTCTACTA  
AAAATACAAAAATTAGTCATGTGTG

>247

CAGCACTTTCGGAGGCCGAGGCGGGTGGACCACCTAAGGTCAGGAGTTCAAGACCAG  
CCTGGCCAACATGGTGAAACCCATCTCTACTAAAAATACAAAAATTAGTCATGTGTGG  
TGGCACGTGCCTGTAGTCCAGCT

>248

AAGGTCAGGAGTTCAAGACCAGCCTGGCCAACATGGTGAAACCCATCTCTACTAAAA  
ATACAAAAATTAGTCATGTGTGGTGGCACGTGCCTGTAGTCCAGCTACTCCAGGAGG  
CTGAGGCAGGAGAATTGCTTGAAC

>249

CAGGAGTTCAAGACCAGCCTGGCCAACATGGTGAAACCCATCTCTACTAAAAATACA  
AAAATTAGTCATGTGTGGTGGCACGTGCCTGTAGTCCAGCTACTCCAGGAGGCTGAG  
GCAGGAGAATTGCTTGAACCCGGG

>250

ACCAGCCTGGCCAACATGGTGAAACCCATCTCTACTAAAAATACAAAAATTAGTCATG

TGTGGTGGCACGTGCCTGTAGTCCCAGCTACTCCAGGAGGCTGAGGCAGGAGAATTGC  
TTGAACCCGGGAGTTGGAGGTTG

>251

TGTGGTGGCACGTGCCTGTAGTCCCAGCTACTCCAGGAGGCTGAGGCAGGAGAATTGC  
TTGAACCCGGGAGTTGGAGGTTGCAGTGACCTGAGATTGCACCACTGCACTCCAGCCT  
GGGCAACAGAGTGAGACTCTGTCT

>252

GCACGTGCCTGTAGTCCCAGCTACTCCAGGAGGCTGAGGCAGGAGAATTGCTTGAACC  
CGGGAGTTGGAGGTTGCAGTGACCTGAGATTGCACCACTGCACTCCAGCCTGGGCAA  
CAGAGTGAGACTCTGTCTTAAAAAA

>253

GCTTGAACCCGGGAGTTGGAGGTTGCAGTGACCTGAGATTGCACCACTGCACTCCAG  
CCTGGGCAACAGAGTGAGACTCTGTCTTAAAAAAAAAAAAAAAAAAAAAAAAATTCCAGAC  
CTCTCCTTTTCAACCATAAATCCCTC

>254

GGGAGTTGGAGGTTGCAGTGACCTGAGATTGCACCACTGCACTCCAGCCTGGGCAAC  
AGAGTGAGACTCTGTCTTAAAAAAAAAAAAAAAAAAAAAAAAATTCCAGACCTCTCCTTTTC  
ACCCATAAATCCCTCTGCCAGTGA

>255

CTCTGTCTTAAAAAAAAAAAAAAAAAAAAAAAAATTCCAGACCTCTCCTTTTCAACCATAAA  
TCCCTCTGCCAGTGACAGCCACTTTCAGCTCCTTTCCCCTATGTCTTCTGGTATTTACC  
TTTGGATTTCTAAATAATAATA

>256

TCCAGACCTCTCCTTTTCAACCATAAATCCCTCTGCCAGTGACAGCCACTTTCAGCTC  
CTTTCCCCTATGTCTTCTGGTATTTACCTTTGGATTCTAAATAATAATAATTAATTGAC  
TGTTACTAATCTGTAA

>257

TCTCCTTTTCAACCATAAATCCCTCTGCCAGTGACAGCCACTTTCAGCTCCTTTCCCCT  
ATGTCTTCTGGTATTTACCTTTGGATTCTAAATAATAATAATTAATTGACTGTTATTAC  
TAATCTGTAATCCTTAGG

>258

CTATGTCTTCTGGTATTTACCTTTGGATTCTAAATAATAATAATTAATTGACTGTTATT  
ACTAATCTGTAATCCTTAGGTAATACCTGTTATATACTAGGTACTGTTCTAAGTGCTTTAC  
AGCCATTAGCTTATTTA

>259

GGTATTTACCTTTGGATTCTAAATAATAATAATTAATTGACTGTTATTACTAATCTGTAA  
ATCCTTAGGTAATACCTGTTATATACTAGGTACTGTTCTAAGTGCTTTACAGCCATTAGCT  
TATTTAATCTCAACAAC

>260

AAATAATAATAATTAATTGACTGTTATTACTAATCTGTAATCCTTAGGTAATACCTGTAA  
TATACTAGGTACTGTTCTAAGTGCTTTACAGCCATTAGCTTATTTAATCTCAACAACCCCT  
ATGAAGCAGGGTCTATT

>261

ATACTAGGTACTGTTCTAAGTGCTTTACAGCCATTAGCTTATTTAATCTCAACAACCCCT  
ATGAAGCAGGGTCTATTATTGTGTCTTTTACCGATGAGGACACTTAAGCACAGAAAGG  
TTAAACAGTTTGTACAACCTC

>262

CTGTTCTAAGTGCTTTACAGCCATTAGCTTATTTAATCTCAACAACCCCTATGAAGCAGG  
GTCTATTATTGTGTCCTTTTACCGATGAGGACACTTAAGCACAGAAAGGTTAAACAGTT  
TGTAACCTCACTATCATT

>263

GTTCTAAGTGCTTTACAGCCATTAGCTTATTTAATCTCAACAACCCCTATGAAGCAGGGT  
CTATTATTGTGTCCTTTTACCGATGAGGACACTTAAGCACAGAAAGGTTAAACAGTTTG  
TACAACCTCACTATCATTAGT

>264

TCAACAACCCCTATGAAGCAGGGTCTATTATTGTGTCCTTTTACCGATGAGGACACTTA  
AGCACAGAAAGGTTAAACAGTTTGTAACCTCACTATCATTAGTAGGTGTTAAAGAA  
CCTAGGTAGTCTAGCTCCAGAAT

>265

CCCTATGAAGCAGGGTCTATTATTGTGTCCTTTTACCGATGAGGACACTTAAGCACAGA  
AAGGTTAAACAGTTTGTAACCTCACTATCATTAGTAGGTGTTAAAGAACCTAGGTAG  
TCTAGCTCCAGAATCGGTGCTT

>266

GTGTCCTTTTACCGATGAGGACACTTAAGCACAGAAAGGTTAAACAGTTTGTAACAC  
TCACTATCATTAGTAGGTGTTAAAGAACCTAGGTAGTCTAGCTCCAGAATCGGTGCTTG  
TAATCATACTCCCCTCCTGTATT

>267

CCTTTTACCGATGAGGACACTTAAGCACAGAAAGGTTAAACAGTTTGTAACCTCAC  
TATCATTAGTAGGTGTTAAAGAACCTAGGTAGTCTAGCTCCAGAATCGGTGCTTGTAAT  
CATACTCCCCTCCTGTATTGTCT

>268

ACACTTAAGCACAGAAAGGTTAAACAGTTTGTAACCTCACTATCATTAGTAGGTGTT  
AAAGAACCTAGGTAGTCTAGCTCCAGAATCGGTGCTTGTAATCATACTCCCCTCCTGTA  
TTGTCTCTCATTGCTATTTCTT

>269

GTTTGTAACCTCACTATCATTAGTAGGTGTTAAAGAACCTAGGTAGTCTAGCTCCAG  
AATCGGTGCTTGTAATCATACTCCCCTCCTGTATTGTCTCTCATTGCTATTTCTTCGTCTG  
TCAATTTTAGGCATTATCTG

>270

CATTAGTAGGTGTTAAAGAACCTAGGTAGTCTAGCTCCAGAATCGGTGCTTGTAATCAT  
ACTCCCCTCCTGTATTGTCTCTCATTGCTATTTCTTCGTCTGTCAATTTTAGGCATTATCT  
GTTAAGCTTTTAGTATGGGA

>271

GTAGGTGTTAAAGAACCTAGGTAGTCTAGCTCCAGAATCGGTGCTTGTAATCATACTCC  
CCTCCTGTATTGTCTCTCATTGCTATTTCTTCGTCTGTCAATTTTAGGCATTATCTGTAA  
GCTTTTAGTATGGGATATGA

>272

TAGTCTAGCTCCAGAATCGGTGCTTGTAATCATACTCCCCTCCTGTATTGTCTCTCATTG  
CTATTTCTTCGTCTGTCAATTTTAGGCATTATCTGTTAAGCTTTTAGTATGGGATATGAGC  
ATTTAGTCTTCTTACACCA

>273

TGTAATCATACTCCCCTCCTGTATTGTCTCTCATTGCTATTTCTTCGTCTGTCAATTTAG

GCATTATCTGTTAAGCTTTTAGTATGGGATATGAGCATTAGTCTTCTTACACCATCACAT  
TGGCTTCCTTCCCCTTT

>274

CCCCTCCTGTATTGTCTCTCATTGCTATTTCTTCGTCTGTCAATTTTAGGCATTATCTGTT  
AAGCTTTTAGTATGGGATATGAGCATTAGTCTTCTTACACCATCACATTGGCTTCCTTT  
CCCCTTTCAGCTTCATAGT

>275

ATTGCTATTTCTTCGTCTGTCAATTTTAGGCATTATCTGTTAAGCTTTTAGTATGGGATAT  
GAGCATTAGTCTTCTTACACCATCACATTGGCTTCCTTCCCCTTTCAGCTTCATAGTA  
ATTTAAAAATAAATCAGTA

>276

TAGTATGGGATATGAGCATTAGTCTTCTTACACCATCACATTGGCTTCCTTCCCCTTTC  
AGCTTCATAGTAATTTAAAAATAAATCAGTATTCTGTGTTTACATTATTATAACTCTGAAA  
GATTCATTTACTATCAAG

>277

TTAGTCTTCTTACACCATCACATTGGCTTCCTTCCCCTTTCAGCTTCATAGTAATTTAAA  
AATAAATCAGTATTCTGTGTTTACATTATTATAACTCTGAAAGATTCATTTACTATCAAGC  
CAAATAGTGTAGTGTGAT

>278

AAAAATAAATCAGTATTCTGTGTTTACATTATTATAACTCTGAAAGATTCATTTACTATCA  
AGCCAAATAGTGTAGTGTGATTAATCTATTTTCTTCTAAAGCTTTTGTTTTCTGGA  
GCTGACAATTGCATTATTT

>279

AAATAAATCAGTATTCTGTGTTTACATTATTATAACTCTGAAAGATTCATTTACTATCAAG  
CCAAATAGTGTAGTGTGATTAATCTATTTTCTTCTAAAGCTTTTGTTTTCTGAGCT  
GACAATTGCATTATTTTT

>280

CTGAAAGATTCATTTACTATCAAGCCAAATAGTGTAGTGTGATTAATCTATTTTCTTCTA  
AAGCTTTTTGTTTTCTGAGCTGACAATTGCATTATTTTTTCAATTTGCTTAGTTTTCTG  
GTATTAATCACTAATTCT

>281

TAATCTATTTTCTTCTAAAGCTTTTTGTTTTCTGAGCTGACAATTGCATTATTTTTTC  
ATTTGCTTAGTTTTCTGGTATTAATCACTAATTCTTCCAAGCCTTTGAGAACTGTAA  
AACCTACAATTCTTGCTT

>282

TTTCTTCTAAAGCTTTTTGTTTTCTGAGCTGACAATTGCATTATTTTTTCAATTTGCTT  
AGTTTTCTGGTATTAATCACTAATTCTTCCAAGCCTTTGAGAACTGTAAAACCTAC  
AATCTTGCTTGAACCCGG

>283

TGCATTATTTTTTCAATTTGCTTAGTTTTCTGGTATTAATCACTAATTCTTCCAAGCCTTT  
GAGAACTGTAAAACCTACAATTCTTGCTTGAACCCGGGAGGCGGAGGCTGCAGTG  
AGCCGAGATCGCACCATTGCA

>284

TCTTCCAAGCCTTTGAGAACTGTAAAACCTACAATTCTTGCTTGAACCCGGGAG  
GCGGAGGCTGCAGTGAGCCGAGATCGCACCATTGCACCCAGCCTGGGCGACAGAGC  
AAGACCCCATCTCAAAAAACAAACA

>285

CATTGCACCCCAGCCTGGGCGACAGAGCAAGACCCCATCTCAAAAAACAAACAAACA  
AAAAACCCCTACAGTTCTGTTTTTCACATGGTCAAATGTATCAGCTGCACTATTTTTTTT  
TTTTGAGACCTAAAACCTAGGGAT

>286

CACCCAGCCTGGGCGACAGAGCAAGACCCCATCTCAAAAAACAAACAAACAAAA  
ACCCCTACAGTTCTGTTTTTCACATGGTCAAATGTATCAGCTGCACTATTTTTTTTTTTG  
AGACCTAAAACCTAGGGATTGCCT

>287

GGCGACAGAGCAAGACCCCATCTCAAAAAACAAACAAACAAAAACCCCTACAGTTC  
TGTTTTTCACATGGTCAAATGTATCAGCTGCACTATTTTTTTTTTTTGAGACCTAAAAC  
AGGGATTGCCTAAGCCTTTCCTT

>288

TATCAGCTGCACTATTTTTTTTTTTTGAGACCTAAAACCTAGGGATTGCCTAAGCCTTCC  
TTTTTAAAAGTCAGGTTTATATAGGTATAACTTGCATACAGTAAAATTAACCTTTTTTA  
GGTGTAAGAGTTCTGAGAGG

>289

GCTGCACTATTTTTTTTTTTTGAGACCTAAAACCTAGGGATTGCCTAAGCCTTTCCTTTT  
AAAAAGTCAGGTTTATATAGGTATAACTTGCATACAGTAAAATTAACCTTTTTTAGGTG  
AAGAGTTCTGAGAGGTTTGA

>290

CTAAAACCTAGGGATTGCCTAAGCCTTTCCTTTTTTAAAAGTCAGGTTTATATAGGTATA  
CTTGCATACAGTAAAATTAACCTTTTTTAGGTGTAAGAGTTCTGAGAGGTTTGATAGAAT  
ATATCAAGGTATAGGGCCAG

>291

AGCCTTTCCTTTTTTAAAAGTCAGGTTTATATAGGTATAACTTGCATACAGTAAAATTA  
CCTTTTTTAGGTGTAAGAGTTCTGAGAGGTTTGATAGAATATATCAAGGTATAGGGCCA  
GCGCCGATGGCTCACACCTGT

>292

AGTCAGGTTTATATAGGTATAACTTGCATACAGTAAAATTAACCTTTTTTAGGTGTAAGA  
GTTCTGAGAGGTTTGATAGAATATATCAAGGTATAGGGCCAGCGCCGATGGCTCACACC  
TGTAGTCCCAACAATTTGGGA

>293

AACTTGCATACAGTAAAATTAACCTTTTTTAGGTGTAAGAGTTCTGAGAGGTTTGATAG  
AATATATCAAGGTATAGGGCCAGCGCCGATGGCTCACACCTGTAGTCCCAACAATTTGG  
GAGGCCAAGGCGGGAGGATCAC

>294

AGGTGTAAGAGTTCTGAGAGGTTTGATAGAATATATCAAGGTATAGGGCCAGCGCCGAT  
GGCTCACACCTGTAGTCCCAACAATTTGGGAGGCCAAGGCGGGAGGATCACTTAGGCC  
CAGGAGTTTGAGACCAGCTTGGG

>295

CGCCGATGGCTCACACCTGTAGTCCCAACAATTTGGGAGGCCAAGGCGGGAGGATCAC  
TTAGGCCAGGAGTTTGAGACCAGCTTGGGCAACATAGTGAGACCCTGTCTCTACAAA  
AAAAAAAAAAAAAAAAAGGTATCAAG

>296

CAACAATTTGGGAGGCCAAGGCGGGAGGATCACTTAGGCCAGGAGTTTGAGACCAG

CTTGGGCAACATAGTGAGACCCTGTCTCTACAAAAAAAAAAAAAAAAAAGGTATCAA  
GGTACAGGAAATTTCCACTACCCAAC

>297

GGAGGCCAAGGCGGGAGGATCACTTAGGCCAGGAGTTTGAGACCAGCTTGGGCAAC  
ATAGTGAGACCCTGTCTCTACAAAAAAAAAAAAAAAAAAGGTATCAAGGTACAGGAA  
ATTTCCACTACCCAACAAAGGTCACT

>298

GCCCAGGAGTTTGAGACCAGCTTGGGCAACATAGTGAGACCCTGTCTCTACAAAAA  
AAAAAAAAAAAAAGGTATCAAGGTACAGGAAATTTCCACTACCCAACAAAGGTCACTC  
ACCCTTTTGTAGTTAATAACTTCTCT

>299

GTTTGAGACCAGCTTGGGCAACATAGTGAGACCCTGTCTCTACAAAAAAAAAAAAA  
AAAAGGTATCAAGGTACAGGAAATTTCCACTACCCAACAAAGGTCACTCACCTTTTG  
TAGTTAATAACTTCTCTGCAACCTA

>300

GACCCTGTCTCTACAAAAAAAAAAAAAAAAAAGGTATCAAGGTACAGGAAATTTCCA  
CTACCCAACAAAGGTCACTCACCTTTTGTAGTTAATAACTTCTCTGCAACCTAGATCC  
AGCCAACCTACTGATAAGATGTCTG

>301

AAAAAAAAAAAAAAAAAAGGTATCAAGGTACAGGAAATTTCCACTACCCAACAAAGGT  
CACTCACCTTTTGTAGTTAATAACTTCTCTGCAACCTAGATCCAGCCAACCTACTGATAA  
GATGTCTGCTTGTATTTTCCA

>302

CAAAGGTCACTCACCTTTTGTAGTTAATAACTTCTCTGCAACCTAGATCCAGCCAAC  
TACTGATAAGATGTCTGCTTGTATTTTCCAGAATGTACTTAAATGGAGTCATACAGTAA  
GTAGGCTTTTGTGTCTGGCTT

>303

GGTCACTCACCTTTTGTAGTTAATAACTTCTCTGCAACCTAGATCCAGCCAACCTACTG  
ATAAGATGTCTGCTTGTATTTTCCAGAATGTACTTAAATGGAGTCATACAGTAAGTAG  
GCTTTTGTGTCTGGCTTCAAG

>304

TTAATAACTTCTCTGCAACCTAGATCCAGCCAACCTACTGATAAGATGTCTGCTTGTAT  
TTTCCAGAATGTACTTAAATGGAGTCATACAGTAAGTAGGCTTTTGTGTCTGGCTTCAA  
GCCTTTACTTTTTATAAAGAA

>305

CCAGCCAACCTACTGATAAGATGTCTGCTTGTATTTTCCAGAATGTACTTAAATGGAGT  
CATACAGTAAGTAGGCTTTTGTGTCTGGCTTCAAGCCTTTACTTTTTATAAAGAATAACA  
ATGGTAATAATTATAGCTGA

>306

ACTGATAAGATGTCTGCTTGTATTTTCCAGAATGTACTTAAATGGAGTCATACAGTAA  
GTAGGCTTTTGTGTCTGGCTTCAAGCCTTTACTTTTTATAAAGAATAACAATGGTAATAA  
TTATAGCTGACATTTATTA

>307

ATGGAGTCATACAGTAAGTAGGCTTTTGTGTCTGGCTTCAAGCCTTTACTTTTTATAAAG  
AATAACAATGGTAATAATTATAGCTGACATTTATTAAGGCTGAGCGGATACTGTATACT  
GTGCTACAGGCTTTTCGTGG

>308

CTTTACTTTTTATAAAGAATAACAATGGTAATAATTATAGCTGACATTTATTAAAGGCTGA  
GCGGATACTGTATACTGTGCTACAGGCTTTTCGTGGGTTATCTCATCACTGTTTCACATA  
TGTAGGTATACAGTTCTTT

>309

TTTTATAAAGAATAACAATGGTAATAATTATAGCTGACATTTATTAAAGGCTGAGCGGAT  
ACTGTATACTGTGCTACAGGCTTTTCGTGGGTTATCTCATCACTGTTTCACATATGTAGG  
TATACAGTTCTTTCTTTAAA

>310

AATGGTAATAATTATAGCTGACATTTATTAAAGGCTGAGCGGATACTGTATACTGTGCTA  
CAGGCTTTTCGTGGGTTATCTCATCACTGTTTCACATATGTAGGTATACAGTTCTTTCTTT  
AAAATATGTGACTGAAAAA

>311

GTAATAATTATAGCTGACATTTATTAAAGGCTGAGCGGATACTGTATACTGTGCTACAGG  
CTTTTCGTGGGTTATCTCATCACTGTTTCACATATGTAGGTATACAGTTCTTTCTTTAAA  
TATGTGACTGAAAAATATT

>312

TGACATTTATTAAAGGCTGAGCGGATACTGTATACTGTGCTACAGGCTTTTCGTGGGTTA  
TCTCATCACTGTTTCACATATGTAGGTATACAGTTCTTTCTTTAAAATATGTGACTGAAA  
AATATTATTGAACATTATGC

>313

AAAGGCTGAGCGGATACTGTATACTGTGCTACAGGCTTTTCGTGGGTTATCTCATCACT  
GTTTCACATATGTAGGTATACAGTTCTTTCTTTAAAATATGTGACTGAAAAATATTATTGA  
ACATTATGCTAAAATTTGTT

>314

TATGTAGGTATACAGTTCTTTCTTTAAAATATGTGACTGAAAAATATTATTGAACATTATG  
CTAAAATTTGTTACTGAGAAGACTTAAGAAAAACAGAGCTCATGTTTCTTTCAACT  
GATTTCTTTTTACATTGTA

>315

CTGAAAAATATTATTGAACATTATGCTAAAATTTGTTACTGAGAAGACTTAAGAAAA  
ACAGAGCTCATGTTTTCTTTCAACTGATTTCTTTTTACATTGTACTTGAGTACCTGGAA  
GCTGCTTGCTTCTTTCCGCAG

>316

TTTGTTACTGAGAAGACTTAAGAAAAACAGAGCTCATGTTTTCTTTCAACTGATTTT  
CTTTTACATTGTACTTGAGTACCTGGAAGCTGCTTGCTTCTTTCCGCAGCTTAGGATAC  
AAACTCCCTGACAGTTAAGTG

>317

TTTACATTGTACTTGAGTACCTGGAAGCTGCTTGCTTCTTTCCGCAGCTTAGGATACAA  
ACTCCCTGACAGTTAAGTGCTTCTTTACTTCCCATCCAGTGCCTTGACAGGGCTTGGT  
ACATGGTTTGGTCCAAAATATT

>318

ATTGTACTTGAGTACCTGGAAGCTGCTTGCTTCTTTCCGCAGCTTAGGATACAACTCC  
CTGACAGTTAAGTGCTTCTTTACTTCCCATCCAGTGCCTTGACAGGGCTTGGTACATG  
GTTTGGTCCAAAATATTGTTG

>319

CTGCTTGCTTCTTTCCGCAGCTTAGGATACAACTCCCTGACAGTTAAGTGCTTCTTTA



CTTCCCATCCAGTGCCTTGCACAGGGCTTGGTACATGGTTTGGTCCAAAATATTTGTTG  
AATAAATTTGCAGATAGCCCAC

>320

GCTTAGGATACAACTCCCTGACAGTTAAGTGCTTCTTTACTTCCCATCCAGTGCCTTG  
CACAGGGCTTGGTACATGGTTTGGTCCAAAATATTTGTTGAATAAATTTGCAGATAGCC  
CACGTGTGTAGGAGAGGGAGAG

>321

TTAAGTGCTTCTTTACTTCCCATCCAGTGCCTTGCACAGGGCTTGGTACATGGTTTGGT  
CCAAAATATTTGTTGAATAAATTTGCAGATAGCCCACGTGTGTAGGAGAGGGAGAGAA  
GGTTCTTGAAAAATGGAGATTGG

>322

GTGCCTTGCACAGGGCTTGGTACATGGTTTGGTCCAAAATATTTGTTGAATAAATTTGC  
AGATAGCCCACGTGTGTAGGAGAGGGAGAGAAGGTTCTTGAAAAATGGAGATTGGAG  
GAATCTAGGATGGGGAGGGAGATA

>323

GCCTTGCACAGGGCTTGGTACATGGTTTGGTCCAAAATATTTGTTGAATAAATTTGCAG  
ATAGCCCACGTGTGTAGGAGAGGGAGAGAAGGTTCTTGAAAAATGGAGATTGGAGGA  
ATCTAGGATGGGGAGGGAGATATG

>324

GAAAAATGGAGATTGGAGGAATCTAGGATGGGGAGGGAGATATGGGAAGGGCCCAGA  
CAGAGGCAGGAGGGTTCCAACCTGTTCTCTTCCCTGCAGCCCAGTGTTCCTCCGGGCT  
CTTTGAGTTCTGCTCGCGTTACACA

>325

GATTGGAGGAATCTAGGATGGGGAGGGAGATATGGGAAGGGCCCAGACAGAGGCAGG  
AGGGTTCCAACCTGTTCTCTTCCCTGCAGCCCAGTGTTCCTCCGGGCTCTTTGAGTTCT  
GCTCGCGTTACACAGGCGCATCTC

>326

GGAGGGAGATATGGGAAGGGCCCAGACAGAGGCAGGAGGGTTCCAACCTGTTCTCTCT  
TCCCTGCAGCCCAGTGTTCCTCCGGGCTCTTTGAGTTCTGCTCGCGTTACACAGGCGCAT  
CTCTGCAAGGAGCAACCCAGCTGA

>327

CCCAGACAGAGGCAGGAGGGTTCCAACCTGTTCTCTTCCCTGCAGCCCAGTGTTCCT  
CGGGCTCTTTGAGTTCTGCTCGCGTTACACAGGCGCATCTCTGCAAGGAGCAACCCAG  
CTGAACAACAAGGTGACATAGTCC

>328

GCAGGAGGGTTCCAACCTGTTCTCTTCCCTGCAGCCCAGTGTTCCTCCGGGCTCTTTG  
AGTTCTGCTCGCGTTACACAGGCGCATCTCTGCAAGGAGCAACCCAGCTGAACAACA  
AGGTGACATAGTCCCAGTCTGTT

>329

TTGAGTTCTGCTCGCGTTACACAGGCGCATCTCTGCAAGGAGCAACCCAGCTGAACAA  
CAAGGTGACATAGTCCCAGTCTGTTCTCTTCCCTCTGGATCCCTGGACTCGGGAT  
TTAACCTGATCCTGGGCTCCCA

>330

CTGCTCGCGTTACACAGGCGCATCTCTGCAAGGAGCAACCCAGCTGAACAACAAGGT  
GACATAGTCCCAGTCTGTTCTCTTCCCTCTGGATCCCTGGACTCGGGATTTAAC  
CTGATCCTGGGCTCCAGCTTGAG

>331

CGCGTTACACAGGCGCATCTCTGCAAGGAGCAACCCAGCTGAACAACAAGGTGACAT  
AGTCCCGAGTCCTGTTCTTCCTTTCTCTGGATCCCTGGACTCGGGATTTAACCTGAT  
CCTGGGCTCCCAGCTTGAGGGGTG

>332

CCTGTTCTTCCTTTCTCTGGATCCCTGGACTCGGGATTTAACCTGATCCTGGGCTCCC  
AGCTTGAGGGGTGGGCAGGAAGGACTGTGACTTAGGTGTTTGTCTTTAGATCTGTGA  
TATTGCCATTAAGTGGGCTGGT

>333

TCTGGATCCCTGGACTCGGGATTTAACCTGATCCTGGGCTCCCAGCTTGAGGGGTGG  
GCAGGAAGGACTGTGACTTAGGTGTTTGTCTTTAGATCTGTGATATTGCCATTAAGT  
GGCTGGTGGTCTGCACCATGCCA

>334

CTGATCCTGGGCTCCCAGCTTGAGGGGTGGGCAGGAAGGACTGTGACTTAGGTGTTT  
TCTTTAGATCTGTGATATTGCCATTAAGTGGGCTGGTGGTCTGCACCATGCCAAGAAG  
TTTGAGGTGAGTGAGGAGGTGAT

>335

GGGTGGGCAGGAAGGACTGTGACTTAGGTGTTTGTCTTTAGATCTGTGATATTGCCAT  
TAACTGGGCTGGTGGTCTGCACCATGCCAAGAAGTTTGAGGTGAGTGAGGAGGTGAT  
GGGAAAGACAGTGGCCATCCTAGG

>336

TGGGCAGGAAGGACTGTGACTTAGGTGTTTGTCTTTAGATCTGTGATATTGCCATTA  
CTGGGCTGGTGGTCTGCACCATGCCAAGAAGTTTGAGGTGAGTGAGGAGGTGATGGG  
AAAGACAGTGGCCATCCTAGGGTA

>337

GTCTTTAGATCTGTGATATTGCCATTAAGTGGGCTGGTGGTCTGCACCATGCCAAGAA  
GTTTGAGGTGAGTGAGGAGGTGATGGGAAAGACAGTGGCCATCCTAGGGTAGGTGTTT  
AGGATGATGGTGGGGGGCAGCTG

>338

GATCTGTGATATTGCCATTAAGTGGGCTGGTGGTCTGCACCATGCCAAGAAGTTTGAGG  
TGAGTGAGGAGGTGATGGGAAAGACAGTGGCCATCCTAGGGTAGGTGTTTAGGATGAT  
GGTGGGGGGCAGCTGGGAGGGGA

>339

CATTAAGTGGGCTGGTGGTCTGCACCATGCCAAGAAGTTTGAGGTGAGTGAGGAGGTG  
ATGGGAAAGACAGTGGCCATCCTAGGGTAGGTGTTTAGGATGATGGTGGGGGGCAGCT  
GGGAGGGGAATTGCTCTTCTCTT

>340

GTGGTCTGCACCATGCCAAGAAGTTTGAGGTGAGTGAGGAGGTGATGGGAAAGACAG  
TGCCATCCTAGGGTAGGTGTTTAGGATGATGGTGGGGGGCAGCTGGGAGGGGAATTG  
CTCTTCTTTATGAGACCACTGTC

>341

AGGGTAGGTGTTTAGGATGATGGTGGGGGGCAGCTGGGAGGGGAATTGCTCTTCTCTT  
TATGAGACCACTGTCTTGCCATAGGCCTCTGGCTTCTGCTATGTCAACGACATTGTGATT  
GGCATCCTGGAGCTGCTCAAGT

>342

CAGCTGGGAGGGGAATTGCTCTTCTCTTTATGAGACCACTGTCTTGCCATAGGCCTCTG

GCTTCTGCTATGTCAACGACATTGTGATTGGCATCCTGGAGCTGCTCAAGTAAGTAGCC  
CAGGAGGAGATGGGGGCAGTTA

>343

GAATTGCTCTTCTCTTTATGAGACCACTGTCTTGCCATAGGCCTCTGGCTTCTGCTATGT  
CAACGACATTGTGATTGGCATCCTGGAGCTGCTCAAGTAAGTAGCCCAGGAGGAGATG  
GGGGCAGTTACGGGATTCTTGG

>344

CTGTCTTGCCATAGGCCTCTGGCTTCTGCTATGTCAACGACATTGTGATTGGCATCCTGG  
AGCTGCTCAAGTAAGTAGCCCAGGAGGAGATGGGGGCAGTTACGGGATTCTTGGCTGA  
GGAGGTCTCTCAGTCTCAACCC

>345

CTATGTCAACGACATTGTGATTGGCATCCTGGAGCTGCTCAAGTAAGTAGCCCAGGAG  
GAGATGGGGGCAGTTACGGGATTCTTGGCTGAGGAGGTCTCTCAGTCTCAACCCTGAC  
CTTGACCTCCCTCCTCCCTGATTA

>346

CATCCTGGAGCTGCTCAAGTAAGTAGCCCAGGAGGAGATGGGGGCAGTTACGGGATTC  
TTGGCTGAGGAGGTCTCTCAGTCTCAACCCTGACCTTGACCTCCCTCCTCCCTGATTAG  
CTTCTCCAAGTTCTTGATGCTT

>347

CTTGGCTGAGGAGGTCTCTCAGTCTCAACCCTGACCTTGACCTCCCTCCTCCCTGATTA  
GCTTCTCCAAGTTCTTGATGCTTTATTACAGGCTGCCTCTTCCACTGCTGCAGATTCCCT  
ACTGCCTGCTCACATTTACAGC

>348

TGCCTCTTCCACTGCTGCAGATTCCCTACTGCCTGCTCACATTTACAGCCTTCTCTGCATA  
TCCCTCTCCTGTCCCTGCCTCTAGCCTCTAGGCTGGAGCCCCAGTTGCCTTTAGGGAA  
CTGGTGACATTAAGTTTCAGG

>349

GCTCACATTTACAGCCTTCTCTGCATATCCCTCTCCTGTCCCTGCCTCTAGCCTCTAGGCT  
GGAGCCCCAGTTGCCTTTAGGGAACTGGTGACATTAAGTTTCAGGTGACCAGGGCAG  
AAGCAGACTCTTACAATTCGA

>350

TCTGCATATCCCTCTCCTGTCCCTGCCTCTAGCCTCTAGGCTGGAGCCCCAGTTGCCTT  
TAGGGAACTGGTGACATTAAGTTTCAGGTGACCAGGGCAGAAGCAGACTCTTACAAT  
TCGAGACCCGGTGTGAGAGG

>351

CCTCTCCTGTCCCTGCCTCTAGCCTCTAGGCTGGAGCCCCAGTTGCCTTTAGGGAACT  
GGTGACATTAAGTTTCAGGTGACCAGGGCAGAAGCAGACTCTTACAATTCGAGACCC  
GGTGTGAGAGGAGTGGGTTGG

>352

TGTCCTGCCTCTAGCCTCTAGGCTGGAGCCCCAGTTGCCTTTAGGGAACTGGTGACA  
TTAAGTTTCAGGTGACCAGGGCAGAAGCAGACTCTTACAATTCGAGACCCGGTGTGTT  
GAGAGGAGTGGGTTGGGGGGTTC

>353

TTTAGGGAACTGGTGACATTAAGTTTCAGGTGACCAGGGCAGAAGCAGACTCTTACA  
ATTCGAGACCCGGTGTGAGAGGAGTGGGTTGGGGGGTTCACCTCTAGCTCAGACCC  
TGGCTTTGGCTTCCCTCTAGGTAC

>354

TAGGGAACTGGTGACATTAAGTTTCAGGTGACCAGGGCAGAAGCAGACTCTTCACAAT  
TCGAGACCCGGTGTGTTGAGAGGAGTGGGTTGGGGGGTTCACTTCTAGCTCAGACCCTG  
GCTTTGGCTTCCCTCTAGGTACCA

>355

TGACATTAAGTTTCAGGTGACCAGGGCAGAAGCAGACTCTTCACAATTCGAGACCCGG  
TGTTTGTAGAGGAGTGGGTTGGGGGGTTCACTTCTAGCTCAGACCCTGGCTTTGGCTTC  
CCTCTAGGTACCACCCTCGGGTGC

>356

TCAGGTGACCAGGGCAGAAGCAGACTCTTCACAATTCGAGACCCGGTGTGTTGAGAGG  
AGTGGGTTGGGGGGTTCACTTCTAGCTCAGACCCTGGCTTTGGCTTCCCTCTAGGTACC  
ACCCTCGGGTGCTCTACATTGACA

>357

CCCGTGTTTGTAGAGGAGTGGGTTGGGGGGTTCACTTCTAGCTCAGACCCTGGCTTTG  
GCTTCCCTCTAGGTACCACCCTCGGGTGCTCTACATTGACATTGACATCCACCATGGTG  
ACGGGGTTCAAGAAGCTTTCTAC

>358

AGGAGTGGGTTGGGGGGTTCACTTCTAGCTCAGACCCTGGCTTTGGCTTCCCTCTAGG  
TACCACCCTCGGGTGCTCTACATTGACATTGACATCCACCATGGTGACGGGGTTCAAGA  
AGCTTTCTACCTCACTGACCGGG

>359

AGACCCTGGCTTTGGCTTCCCTCTAGGTACCACCCTCGGGTGCTCTACATTGACATTGA  
CATCCACCATGGTGACGGGGTTCAAGAAGCTTTCTACCTCACTGACCGGGTCATGACG  
GTGTCCTTCCACAAATACGGAAA

>360

GGTGCTCTACATTGACATTGACATCCACCATGGTGACGGGGTTCAAGAAGCTTTCTACC  
TCACTGACCGGGTCATGACGGTGTCTTCCACAAATACGGAAATTACTTCTTCCCTGGC  
ACAGGTATGGGAATAGGGATTA

>361

CATTGACATTGACATCCACCATGGTGACGGGGTTCAAGAAGCTTTCTACCTCACTGACC  
GGGTCATGACGGTGTCTTCCACAAATACGGAAATTACTTCTTCCCTGGCACAGGTATG  
GGAATAGGGATTACTTTCCCCT

>362

CTTCTTCCCTGGCACAGGTATGGGAATAGGGATTACTTTCCCCTTTGCACCCTTCAGCT  
CTTACTATGAGTGCCTCCTTCTCAGCCTTCTAGTCTCATCTCAGGTGTCCCCTCCTCAG  
AGAAGCCTTTCCTTACCACTC

>363

GGAATAGGGATTACTTTCCCCTTTGCACCCTTCAGCTCTTACTATGAGTGCCTCCTTCT  
CAGCCTTCTAGTCTCATCTCAGGTGTCCCCTCCTCAGAGAAGCCTTTCCTTACCACTCC  
AGTTATCATAATCACCTCCTT

>364

GCCTCCTTCTCAGCCTTCTAGTCTCATCTCAGGTGTCCCCTCCTCAGAGAAGCCTTTCC  
TTACCACTCCAGTTATCATAATCACCTCCTTCCCATTCTCTGTTACATCAGCCTCATTG  
TTTCCCCTCAGAACACTCACT

>365

GTGTCCCCTCCTCAGAGAAGCCTTTCCTTACCACTCCAGTTATCATAATCACCTCCTTCC

CCATTCTCTGTTACATCAGCCTCATTGTTTCCCTCAGAACACTCACTGCTATTTGTGTT  
TATTGTGGTTTTTTGTTTTG

>366

AAGCCTTTCCTTACCACTCCAGTTATCATAATCACCTCCTTCCCATTCCCTCTGTTACATC  
AGCCTCATTGTTTCCCTCAGAACACTCACTGCTATTTGTGTTTATTGTGGTTTTTTGTTT  
TGTTTTGTTTACTGCCTCC

>367

TAATCACCTCCTTCCCATTCCCTCTGTTACATCAGCCTCATTGTTTCCCTCAGAACACTC  
ACTGCTATTTGTGTTTATTGTGGTTTTTTGTTTTGTTTACTGCCTCCCTCCTCCTC  
ATGGCTATCCCTAAGAAT

>368

TCCTCTGTTACATCAGCCTCATTGTTTCCCTCAGAACACTCACTGCTATTTGTGTTTATT  
GTGGTTTTTTGTTTTGTTTACTGCCTCCCTCCTCATGGCTATCCCTAAGAAT  
ATAAGCGTGGTGGGATATC

>369

TGTTACATCAGCCTCATTGTTTCCCTCAGAACACTCACTGCTATTTGTGTTTATTGTGGT  
TTTTTGTTTTGTTTTGTTTACTGCCTCCCTCCTCATGGCTATCCCTAAGAATATAAG  
CGTGGTGGGATATCGTAAA

>370

CATCAGCCTCATTGTTTCCCTCAGAACACTCACTGCTATTTGTGTTTATTGTGGTTTTTT  
GTTTTGTTTTGTTTACTGCCTCCCTCCTCATGGCTATCCCTAAGAATATAAGCGTG  
GTGGGATATCGTAAATTCA

>371

GTGGTTTTTTGTTTTGTTTTGTTTACTGCCTCCCTCCTCATGGCTATCCCTAAGAAT  
ATAAGCGTGGTGGGATATCGTAAATTCATTAGTTCCATTGCTTGCTGCATCCCTACTGC  
CTAGTACACAGTTGGCTCA

>372

GTTTTGTTTTGTTTACTGCCTCCCTCCTCATGGCTATCCCTAAGAATATAAGCGTG  
GTGGGATATCGTAAATTCATTAGTTCCATTGCTTGCTGCATCCCTACTGCCTAGTACAC  
AGTTGGCTCAGAGTGGATCC

>373

TACTGCCTCCCTCCTCATGGCTATCCCTAAGAATATAAGCGTGGTGGGATATCGTA  
AATTTATTAGTTCCATTGCTTGCTGCATCCCTACTGCCTAGTACACAGTTGGCTCAGAG  
TGGATCCCCAAAATTTT

>374

TAAGAATATAAGCGTGGTGGGATATCGTAAATTCATTAGTTCCATTGCTTGCTGCATCC  
CTACTGCCTAGTACACAGTTGGCTCAGAGTGGATCCCCAAAATTTGCCAATGAA  
TGCAAGCTGCAAGAGATTTAG

>375

ATAAGCGTGGTGGGATATCGTAAATTCATTAGTTCCATTGCTTGCTGCATCCCTACTGC  
CTAGTACACAGTTGGCTCAGAGTGGATCCCCAAAATTTGCCAATGAATGCAAG  
CTGCAAGAGATTTAGTGGCTCT

>376

GGGATATCGTAAATTCATTAGTTCCATTGCTTGCTGCATCCCTACTGCCTAGTACACAG  
TTGGCTCAGAGTGGATCCCCAAAATTTGCCAATGAATGCAAGCTGCAAGAGAT  
TTAGTGGCTCTAGGGAGTTTAT

>377

AGTACACAGTTGGCTCAGAGTGGATCCCCAAAAC TATTTGCCAATGAATGCAAGCT  
GCAAGAGATTTAGTGGCTCTAGGGAGTTTATGGTGAAGCTACATAGATGGAATGAGAG  
GCTCCCAGAGTGCAGATTGGGGCT

>378

CTCAGAGTGGATCCCCAAAAC TATTTGCCAATGAATGCAAGCTGCAAGAGATTTAG  
TGGCTCTAGGGAGTTTATGGTGAAGCTACATAGATGGAATGAGAGGCTCCCAGAGTGC  
AGATTGGGGCTGAAACAGCTGGGT

>379

TGGATCCCCAAAAC TATTTGCCAATGAATGCAAGCTGCAAGAGATTTAGTGGCTCTA  
GGGAGTTTATGGTGAAGCTACATAGATGGAATGAGAGGCTCCCAGAGTGCAGATTGGG  
GCTGAAACAGCTGGGTTGTGGGT

>380

GCTGCAAGAGATTTAGTGGCTCTAGGGAGTTTATGGTGAAGCTACATAGATGGAATGAG  
AGGCTCCCAGAGTGCAGATTGGGGCTGAAACAGCTGGGTTGTGGGTGCTTCCCATGTG  
TGGCTACCACCACCCACTTCCCT

>381

GAGTTTATGGTGAAGCTACATAGATGGAATGAGAGGCTCCCAGAGTGCAGATTGGGGC  
TGAAACAGCTGGGTTGTGGGTGCTTCCCATGTGTGGCTACCACCACCCACTTCCCTAC  
AGGTGACATGTATGAAGTCGGGGC

>382

TTTATGGTGAAGCTACATAGATGGAATGAGAGGCTCCCAGAGTGCAGATTGGGGCTGA  
AACAGCTGGGTTGTGGGTGCTTCCCATGTGTGGCTACCACCACCCACTTCCCTACAGG  
TGACATGTATGAAGTCGGGGCAGA

>383

AGATTGGGGCTGAAACAGCTGGGTTGTGGGTGCTTCCCATGTGTGGCTACCACCACCC  
ACTTCCCTACAGGTGACATGTATGAAGTCGGGGCAGAGAGTGGCCGCTACTACTGTCT  
GAACGTGCCCTGCGGGATGGCAT

>384

GGCTGAAACAGCTGGGTTGTGGGTGCTTCCCATGTGTGGCTACCACCACCCACTTCCC  
TACAGGTGACATGTATGAAGTCGGGGCAGAGAGTGGCCGCTACTACTGTCTGAACGTG  
CCCCTGCGGGATGGCATTGATGAC

>385

GGGTGCTTCCCATGTGTGGCTACCACCACCCACTTCCCTACAGGTGACATGTATGAAGT  
CGGGCAGAGAGTGGCCGCTACTACTGTCTGAACGTGCCCTGCGGGATGGCATTGAT  
GACCAGAGTAAGTACCGAAGTCT

>386

CACCACCCACTTCCCTACAGGTGACATGTATGAAGTCGGGGCAGAGAGTGGCCGCTAC  
TACTGTCTGAACGTGCCCTGCGGGATGGCATTGATGACCAGAGTAAGTACCGAAGTC  
TCCCTCTGTTCCCTAGGCCCTT

>387

GAGAGTGGCCGCTACTACTGTCTGAACGTGCCCTGCGGGATGGCATTGATGACCAGA  
GTAAGTACCGAAGTCTTCCCTCTGTTCCCTAGGCCCTTCTTTTTCTCCTTGAATAACC  
TCTTCTGCCTGGTATTGTCTGC

>388

TAAGTACCGAAGTCTTCCCTCTGTTCCCTAGGCCCTTCTTTTTCTCCTTGAATAACCT

CTTCTGCCTGGTATTGTCTGCTGTTGGGCCAGTTGTCCTTAAGGATGAATGGCCTTCAG  
AGGGACCATGAATCTCTGGAA

>389

ACCGAAGTCTTCCCTCTGTTCCCTAGGCCCTTCTTTTTCTCCTTGAAATAACCTCTTCT  
GCCTGGTATTGTCTGCTGTTGGGCCAGTTGTCCTTAAGGATGAATGGCCTTCAGAGGGA  
CCATGAATCTCTGGAAATTGT

>390

TGTTCCCTAGGCCCTTCTTTTTCTCCTTGAAATAACCTCTTCTGCCTGGTATTGTCTGC  
TGTTGGGCCAGTTGTCCTTAAGGATGAATGGCCTTCAGAGGGACCATGAATCTCTGGA  
AATTGTATGCAACATATCATGT

>391

TCCCTAGGCCCTTCTTTTTCTCCTTGAAATAACCTCTTCTGCCTGGTATTGTCTGCTGT  
TGGGCCAGTTGTCCTTAAGGATGAATGGCCTTCAGAGGGACCATGAATCTCTGGAAAT  
TGATGCAACATATCATGTGTA

>392

CAGTTGTCCTTAAGGATGAATGGCCTTCAGAGGGACCATGAATCTCTGGAAATTGTATG  
CAACATATCATGTGTATGTGCATTTTTCTGGGAAAAGTCATTGGCTTTCATCAGTCACTC  
ATAGCAGTCTGGGATCCCTTC

>393

GTTGTCCTTAAGGATGAATGGCCTTCAGAGGGACCATGAATCTCTGGAAATTGTATGCA  
ACATATCATGTGTATGTGCATTTTTCTGGGAAAAGTCATTGGCTTTCATCAGTCACTCAT  
AGCAGTCTGGGATCCCTTCCA

>394

TTCAGAGGGACCATGAATCTCTGGAAATTGTATGCAACATATCATGTGTATGTGCATTTT  
TCTGGGAAAAGTCATTGGCTTTCATCAGTCACTCATAGCAGTCTGGGATCCCTTCCAGA  
AGTTTCAGACCAGTGATTTGA

>395

TATGCAACATATCATGTGTATGTGCATTTTTCTGGGAAAAGTCATTGGCTTTCATCAGTC  
ACTCATAGCAGTCTGGGATCCCTTCCAGAAGTTTCAGACCAGTGATTTGATTCTTTTGG  
GTGGCCCTTTCCTGGGCTAC

>396

TGTGCATTTTTCTGGGAAAAGTCATTGGCTTTCATCAGTCACTCATAGCAGTCTGGGAT  
CCCTTCCAGAAGTTTCAGACCAGTGATTTGATTCTTTTGGGTGGCCCTTTCCTGGGCT  
ACATGCTCGCTCAACCCCTTT

>397

CCAGTGATTTGATTCTTTTGGGTGGCCCTTTCCTGGGCTACATGCTCGCTCAACCCCTT  
TTTTCTTTTGTCCCTGTCTCCCATCCCCTTGGGGTGCCAGGTGCCATCTTTGGCC  
CTCTCCAGTTACAAGCACC

>398

TTTGATTCTTTTGGGTGGCCCTTTCCTGGGCTACATGCTCGCTCAACCCCTTTTTCTT  
TTTGTCCCTGTCTCCCATCCCCTTGGGGTGCCAGGTGCCATCTTTGGCCCTCTCCC  
AGGTTACAAGCACCTTTTCCA

>399

CCCTTTCCTGGGCTACATGCTCGCTCAACCCCTTTTTCTTTTGTCCCTGTCTCCCCA  
TCCCTTGGGGTGCCAGGTGCCATCTTTGGCCCTCTCCAGGTTACAAGCACCTTTTC  
CAGCCGGTTATCAACCAGGTA

>400

CTGGGCTACATGCTCGCTCAACCCCTTTTTCCTTTTGTCCCTGTCTCCCATCCCCTT  
GGGGTGCCAGGTGCCATCTTTGGCCCTCTCCCAGGTACAAGCACCTTTCCAGCCG  
GTTATCAACCAGGTAGTGGACT

>401

CTTTTTCCTTTTGTCCCTGTCTCCCATCCCCTGGGGTGCCAGGTGCCATCTTTGGC  
CCTCTCCAGGTACAAGCACCTTTCCAGCCGGTTATCAACCAGGTAGTGGACTTCTA  
CCAACCCACGTGCATTGTGCT

>402

CCCCATCCCCTGGGGTGCCAGGTGCCATCTTTGGCCCTCTCCCAGGTACAAGCACC  
TTTTCCAGCCGGTTATCAACCAGGTAGTGGACTTCTACCAACCCACGTGCATTGTGCTC  
CAGGTAATACTGTCAGTTCCTC

>403

GGGGTGCCAGGTGCCATCTTTGGCCCTCTCCCAGGTACAAGCACCTTTCCAGCCG  
GTTATCAACCAGGTAGTGGACTTCTACCAACCCACGTGCATTGTGCTCCAGGTAATACT  
GTCAGTTCCTCCTCAGGAGTGTT

>404

GCCCTCTCCAGGTACAAGCACCTTTCCAGCCGGTTATCAACCAGGTAGTGGACTTC  
TACCAACCCACGTGCATTGTGCTCCAGGTAATACTGTCAGTTCCTCCTCAGGAGTGTT  
TGCCTGGGCTTGGGGAAAGAGA

>405

TTTTCCAGCCGGTTATCAACCAGGTAGTGGACTTCTACCAACCCACGTGCATTGTGCTC  
CAGGTAATACTGTCAGTTCCTCCTCAGGAGTGTTCTGCCTGGGCTTGGGGAAAGAGAG  
CAAGGGAAGAGGAGTTCTTTAG

>406

CCAGCCGGTTATCAACCAGGTAGTGGACTTCTACCAACCCACGTGCATTGTGCTCCAG  
GTAATACTGTCAGTTCCTCCTCAGGAGTGTTCTGCCTGGGCTTGGGGAAAGAGAGCAA  
GGGAAGAGGAGTTCTTTAGGTTG

>407

ACCAGGTAGTGGACTTCTACCAACCCACGTGCATTGTGCTCCAGGTAATACTGTCAGTT  
CCTCCTCAGGAGTGTTCTGCCTGGGCTTGGGGAAAGAGAGCAAGGGAAGAGGAGGTT  
CTTTAGGTTGGTGGTGAAGGGGT

>408

GGTAATACTGTCAGTTCCTCCTCAGGAGTGTTCTGCCTGGGCTTGGGGAAAGAGAGCA  
AGGGAAGAGGAGGTTCTTTAGGTTGGTGGTGAAGGGGTATCTGTGATGTTCTGATCA  
GTTCTGATCACTGCACTTTCCTGG

>409

GTCAGTTCCTCCTCAGGAGTGTTCTGCCTGGGCTTGGGGAAAGAGAGCAAGGGAAGA  
GGAGGTTCTTTAGGTTGGTGGTGAAGGGGTATCTGTGATGTTCTGATCAGTTCTGATC  
ACTGCACTTTCCTGGGGTTTTGCT

>410

GAGTGTTCCTGGGCTTGGGGAAAGAGAGCAAGGGAAGAGGAGGTTCTTTAGGTT  
GGTGGTGAAGGGGTATCTGTGATGTTCTGATCAGTTCTGATCACTGCACTTTCCTGGG  
GTTTTGCTTTTGCAGTGTGGAGC

>411

TTCTTTAGGTTGGTGGTGAAGGGGTATCTGTGATGTTCTGATCAGTTCTGATCACTGC



ACTTTCCTGGGGTTTTGCTTTTTGCAGTGTGGAGCTGACTCTCTGGGCTGTGATCGATT  
GGGCTGCTTTAACCTCAGCATC

>412

GTGGAAGGGGTATCTGTGATGTTCTGATCAGTTCTGATCACTGCACTTTCCTGGGGTTT  
TGCTTTTTGCAGTGTGGAGCTGACTCTCTGGGCTGTGATCGATTGGGCTGCTTTAACCT  
CAGCATCCGAGGGCATGGGTGA

>413

CTGATCAGTTCTGATCACTGCACTTTCCTGGGGTTTTGCTTTTTGCAGTGTGGAGCTGA  
CTCTCTGGGCTGTGATCGATTGGGCTGCTTTAACCTCAGCATCCGAGGGCATGGGTGAG  
ACTTGCTCTCCTTCTTCTCCCC

>414

TGCAGTGTGGAGCTGACTCTCTGGGCTGTGATCGATTGGGCTGCTTTAACCTCAGCATC  
CGAGGGCATGGGTGAGACTTGCTCTCCTTCTTCTCCCCAAGGTTTTTAAGTGGCCTTGG  
ACTTCAGTACGTGGGTGGGGGT

>415

ATCGATTGGGCTGCTTTAACCTCAGCATCCGAGGGCATGGGTGAGACTTGCTCTCCTTC  
TTCTCCCAAGGTTTTTAAGTGGCCTTGGACTTCAGTACGTGGGTGGGGGTAGTTGGG  
GAATGGCCTCACCTCTTCTTGG

>416

GGCTGCTTTAACCTCAGCATCCGAGGGCATGGGTGAGACTTGCTCTCCTTCTTCTCCCC  
AAGGTTTTTAAGTGGCCTTGGACTTCAGTACGTGGGTGGGGGTAGTTGGGGAATGGGC  
CTCACCTCTTCTTGGAAATCAAA

>417

GCATCCGAGGGCATGGGTGAGACTTGCTCTCCTTCTTCTCCCAAGGTTTTTAAGTGGC  
CTTGGACTTCAGTACGTGGGTGGGGGTAGTTGGGGAATGGGCCTCACCTCTTCTTGGGA  
AATCAAAAATAGCTACAAATTGT

>418

CAGTACGTGGGTGGGGGTAGTTGGGGAATGGGCCTCACCTCTTCTTGGAAATCAAAAA  
TAGCTACAAATTGTAAGTGAAGTGAAGTGCATCTTGAACAGGGTCCCTAGATGGTC  
ATTCATTCACGATATATTTTAT

>419

TAGTTGGGGAATGGGCCTCACCTCTTCTTGGAAATCAAAAATAGCTACAAATTGTAAGT  
GAACTAGAAATGTCATCTTGAACAGGGTCCCTAGATGGTCATTCATTCACGATATATTT  
TTATTAAGCACCTGTTATGTT

>420

CCTCACCTCTTCTTGGAAATCAAAAATAGCTACAAATTGTAAGTGAAGTGAAGTGCAT  
TCTTGAACAGGGTCCCTAGATGGTCATTCATTCACGATATATTTTATTAAGCACCTGTT  
ATGTTCCAGGCATCATACCA

>421

TTGGAATCAAAAATAGCTACAAATTGTAAGTGAAGTGAAGTGCATCTTGAACAGGG  
TCCCTAGATGGTCATTCATTCACGATATATTTTATTAAGCACCTGTTATGTTCCAGGCA  
TCATACCACATCATGGGGAT

>422

CTAGAAATGTCATCTTGAACAGGGTCCCTAGATGGTCATTCATTCACGATATATTTTAT  
TAAGCACCTGTTATGTTCCAGGCATCATACCACATCATGGGGATGGAATAAGGAGTCTC  
CCATGGAGTTTACAGTTTAG

>423

AATGTCATCTTGAACAGGGTCCCTAGATGGTCATTCATTACGATATATTTTTATTAAGC  
ACCTGTTATGTTCCAGGCATCATAACCACATCATGGGGATGGAATAAGGAGTCTCCCATG  
GAGTTTACAGTTTAGGAAAC

>424

CACGATATATTTTTATTAAGCACCTGTTATGTTCCAGGCATCATAACCACATCATGGGGATG  
GAATAAGGAGTCTCCCATGGAGTTTACAGTTTAGGAAACAGACAAAAAATAAATAATC  
AAATGAAATAAATAGATTCTT

>425

GCACCTGTTATGTTCCAGGCATCATAACCACATCATGGGGATGGAATAAGGAGTCTCCCA  
TGGAGTTTACAGTTTAGGAAACAGACAAAAAATAAATAATCAAATGAAATAAATAGATT  
CTTATAAATTCTGTGAAAGAAA

>426

GGAGTTTACAGTTTAGGAAACAGACAAAAAATAAATAATCAAATGAAATAAATAGATTCT  
TTATAAATTCTGTGAAAGAAAAAAGAAAGCTGAGACACAGGATACAATGGGGGACCT  
ACTTGAGATAGCATGGTTTCGGA

>427

TAAATTCTGTGAAAGAAAAAAGAAAGCTGAGACACAGGATACAATGGGGGACCTAC  
TTGAGATAGCATGGTTTCGGAAGTTTTTCTGAGGAAGTAAAATTTGAGTTGAGACCTG  
GAGACTAAGAAGGAGTGAGTCATAA

>428

TGAAAGAAAAAAGAAAGCTGAGACACAGGATACAATGGGGGACCTACTTGAGATAG  
CATGGTTTCGGAAGTTTTTCTGAGGAAGTAAAATTTGAGTTGAGACCTGGAGACTAAG  
AAGGAGTGAGTCATAAGAGGAGCAG

>429

AAAGCTGAGACACAGGATACAATGGGGGACCTACTTGAGATAGCATGGTTTCGGAAGT  
TTTTCTGAGGAAGTAAAATTTGAGTTGAGACCTGGAGACTAAGAAGGAGTGAGTCATA  
AGAGGAGCAGAGAGAAGCCTGACC

>430

GAGATAGCATGGTTTCGGAAGTTTTTCTGAGGAAGTAAAATTTGAGTTGAGACCTGGA  
GACTAAGAAGGAGTGAGTCATAAGAGGAGCAGAGAGAAGCCTGACCCAAGCATGGA  
CAAAGGCCACAAAAGGCTCTGAGGG

>431

TAGCATGGTTTCGGAAGTTTTTCTGAGGAAGTAAAATTTGAGTTGAGACCTGGAGACT  
AAGAAGGAGTGAGTCATAAGAGGAGCAGAGAGAAGCCTGACCCAAGCATGGACAAA  
GGCCACAAAAGGCTCTGAGGGCTGG

>432

AAGAGGAGCAGAGAGAAGCCTGACCCAAGCATGGACAAAGGCCACAAAAGGCTCT  
GAGGGCTGGGCCAGTGGCACACACCTATAATCCCAACACTTCCAGAGGCCAAGGTG  
GGAGAATCGCCTGAGGCTAGGAGTTTG

>433

GCCACAAAAGGCTCTGAGGGCTGGGCCAGTGGCACACACCTATAATCCCAACACTT  
CCAGAGGCCAAGGTGGGAGAATCGCCTGAGGCTAGGAGTTTGGAGCCAGCCTGGGCA  
ACATAGTGAGAGCCATCTCTACAGA

>434

GCCCAGTGGCACACACCTATAATCCCAACACTTCCAGAGGCCAAGGTGGGAGAATCGC

CTGAGGCTAGGAGTTTGAGGCCAGCCTGGGCAACATAGTGAGAGCCATCTCTACAGAA  
AATAAAAAACAAAATCAGCTGGGC

>435

CAACACTTCCAGAGGCCAAGGTGGGAGAATCGCCTGAGGCTAGGAGTTTGAGGCCAG  
CCTGGGCAACATAGTGAGAGCCATCTCTACAGAAAATAAAAAACAAAATCAGCTGGGC  
ATGATGGTGCATGCCTATAGTCCTA

>436

GGCCAGCCTGGGCAACATAGTGAGAGCCATCTCTACAGAAAATAAAAAACAAAATCA  
GCTGGGCATGATGGTGCATGCCTATAGTCCTAGCTACTCAGGAAGCTGAGGCAGGAGG  
ATCACTTGAGCCTAGGAGTTTGAGG

>437

AACATAGTGAGAGCCATCTCTACAGAAAATAAAAAACAAAATCAGCTGGGCATGATGG  
TGCATGCCTATAGTCCTAGCTACTCAGGAAGCTGAGGCAGGAGGATCACTTGAGCCTA  
GGAGTTTGAGGTTACAGTGAACCTA

>438

GCATGATGGTGCATGCCTATAGTCCTAGCTACTCAGGAAGCTGAGGCAGGAGGATCAC  
TTGAGCCTAGGAGTTTGAGGTTACAGTGAACCTATGATTGTGCCACTGGACTTCAGTCTG  
TTGAGGTGAGGTCCGAGAAGCTG

>439

GGTGCATGCCTATAGTCCTAGCTACTCAGGAAGCTGAGGCAGGAGGATCACTTGAGCC  
TAGGAGTTTGAGGTTACAGTGAACCTATGATTGTGCCACTGGACTTCAGTCTGTTGAGGT  
GAGGTCCGAGAAGCTGGCCATGG

>440

TGCCATAGTCCTAGCTACTCAGGAAGCTGAGGCAGGAGGATCACTTGAGCCTAGGAG  
TTTGAGGTTACAGTGAACCTATGATTGTGCCACTGGACTTCAGTCTGTTGAGGTGAGGTC  
CGAGAAGCTGGCCATGGTGAAGA

>441

AGCTACTCAGGAAGCTGAGGCAGGAGGATCACTTGAGCCTAGGAGTTTGAGGTTACA  
GTGAACCTATGATTGTGCCACTGGACTTCAGTCTGTTGAGGTGAGGTCCGAGAAGCTGG  
CCATGGTGAAGATTGTGCATGAGCC

>442

GAGGCAGGAGGATCACTTGAGCCTAGGAGTTTGAGGTTACAGTGAACCTATGATTGTGC  
CACTGGACTTCAGTCTGTTGAGGTGAGGTCCGAGAAGCTGGCCATGGTGAAGATTGTG  
CATGAGCCTTTAAACCCTGGTAAG

>443

GGTTACAGTGAACCTATGATTGTGCCACTGGACTTCAGTCTGTTGAGGTGAGGTCCGAG  
AAGCTGGCCATGGTGAAGATTGTGCATGAGCCTTTAAACCCTGGTAAGGAGTTTGAATT  
ATATTCAAAGATGATGGGAAAC

>444

GAACTATGATTGTGCCACTGGACTTCAGTCTGTTGAGGTGAGGTCCGAGAAGCTGGCC  
ATGGTGAAGATTGTGCATGAGCCTTTAAACCCTGGTAAGGAGTTTGAATTATATTCAA  
AGATGATGGGAAACCATTGAAGG

>445

CTTCAGTCTGTTGAGGTGAGGTCCGAGAAGCTGGCCATGGTGAAGATTGTGCATGAGC  
CTTTAAACCCTGGTAAGGAGTTTGAATTATATTCAAAGATGATGGGAAACCATTGAAG  
GATTTAAGCAGGAAAGTGACAT

>446

AACCCCTGGTAAGGAGTTTGAATTATATTCCAAAGATGATGGGAAACCATTGAAGGATTT  
TAAGCAGGAAAGTGACATGATCCAATTTGTGTTTAAAAGTGACAATTCTGACTGCTGA  
ATAGAGAAAAGGTTTGGGTAGGGG

>447

TGAATTATATTCCAAAGATGATGGGAAACCATTGAAGGATTTTAAAGCAGGAAAGTGACA  
TGATCCAATTTGTGTTTAAAAGTGACAATTCTGACTGCTGAATAGAGAAAAGGTTTGGGT  
AGGGGGGATGGAGATGGAAGTA

>448

TCCAAAGATGATGGGAAACCATTGAAGGATTTTAAAGCAGGAAAGTGACATGATCCAAT  
TTGTGTTTAAAAGTGACAATTCTGACTGCTGAATAGAGAAAAGGTTTGGGTAGGGGGGA  
TGGAGATGGAAGTAGAAGAGACCT

>449

TTTAAAGCAGGAAAGTGACATGATCCAATTTGTGTTTAAAAGTGACAATTCTGACTGCTG  
AATAGAGAAAAGGTTTGGGTAGGGGGGATGGAGATGGAAGTAGAAGAGACCTAGTTAG  
GAAGCCATGGTGTGGTTAGGTGC

>450

TTTGTGTTTAAAAGTGACAATTCTGACTGCTGAATAGAGAAAAGGTTTGGGTAGGGGGG  
ATGGAGATGGAAGTAGAAGAGACCTAGTTAGGAAGCCATGGTGTGGTTAGGTGCCCA  
GACTAAGGTGGAGGGGGTGGCAAT

>451

TGACAATTCTGACTGCTGAATAGAGAAAAGGTTTGGGTAGGGGGGATGGAGATGGAAGT  
AGAAGAGACCTAGTTAGGAAGCCATGGTGTGGTTAGGTGCCCAGACTAAGGTGGAG  
GGGGTGGCAATGGAGAGAAGTAGAT

>452

GCTGAATAGAGAAAAGGTTTGGGTAGGGGGGATGGAGATGGAAGTAGAAGAGACCTAG  
TTAGGAAGCCATGGTGTGGTTAGGTGCCCAGACTAAGGTGGAGGGGGTGGCAATGG  
AGAGAAGTAGATGATCTGAGAGGTGT

>453

GGGGGATGGAGATGGAAGTAGAAGAGACCTAGTTAGGAAGCCATGGTGTGGTTAGG  
TGCCAGACTAAGGTGGAGGGGGTGGCAATGGAGAGAAGTAGATGATCTGAGAGGTG  
TGTGTGTGTGTGTGTATATATATA

>454

AGATGGAAGTAGAAGAGACCTAGTTAGGAAGCCATGGTGTGGTTAGGTGCCCAGACT  
AAGGTGGAGGGGGTGGCAATGGAGAGAAGTAGATGATCTGAGAGGTGTGTGTGTGTG  
TGTGTGTATATATATATATACAC

>455

GACCTAGTTAGGAAGCCATGGTGTGGTTAGGTGCCCAGACTAAGGTGGAGGGGGTG  
GCAATGGAGAGAAGTAGATGATCTGAGAGGTGTGTGTGTGTGTGTGTATATATATATA  
TATACACACACACACACATAT

>456

CATGGTGTGGTTAGGTGCCCAGACTAAGGTGGAGGGGGTGGCAATGGAGAGAAGTA  
GATGATCTGAGAGGTGTGTGTGTGTGTGTGTATATATATATATACACACACACACA  
CACATATATATGTTTTTTTTTTT

>457

ATGATCTGAGAGGTGTGTGTGTGTGTGTGTATATATATATATACACACACACACAC

ACATATATATGTTTTTTTTTTCTTTTTGAGATGGAGTCTTGCTCTGTCACCCAGGCTGG  
AGTGCAGTGGCACGATCTT

>458

TGTGTATATATATATATACACACACACACACATATATATGTTTTTTTTTTCTTTTTG  
AGATGGAGTCTTGCTCTGTCACCCAGGCTGGAGTGCAGTGGCACGATCTTGGCTCAGT  
GCAAGCTCTGCCTCCTGGG

>459

TATATATACACACACACACACATATATATGTTTTTTTTTTCTTTTTGAGATGGAGT  
CTTGCTCTGTCACCCAGGCTGGAGTGCAGTGGCACGATCTTGGCTCAGTGCAAGCTCT  
GCCTCCTGGGTTCAAGCATT

>460

ACACACACATATATATGTTTTTTTTTTCTTTTTGAGATGGAGTCTTGCTCTGTACC  
CAGGCTGGAGTGCAGTGGCACGATCTTGGCTCAGTGCAAGCTCTGCCTCCTGGGTTCA  
AGCATTCTCCTGCCTCAGCC

>461

TTTTTTCTTTTTGAGATGGAGTCTTGCTCTGTCACCCAGGCTGGAGTGCAGTGGCACG  
ATCTTGGCTCAGTGCAAGCTCTGCCTCCTGGGTTCAAGCATTCTCCTGCCTCAGCCTC  
CTGAGTAGCTGGGACTACTACA

>462

AGTCTTGCTCTGTACCCAGGCTGGAGTGCAGTGGCACGATCTTGGCTCAGTGCAAGC  
TCTGCCTCCTGGGTTCAAGCATTCTCCTGCCTCAGCCTCCTGAGTAGCTGGGACTACT  
ACAAAGGCGTGAGCACCGCGCCG

>463

TGGCACGATCTTGGCTCAGTGCAAGCTCTGCCTCCTGGGTTCAAGCATTCTCCTGCCT  
CAGCCTCCTGAGTAGCTGGGACTACTACAAAGGCGTGAGCACCGCGCCGGGCGTGAG  
TTATATTTTCAAGGCTAGAATTGA

>464

AGCTCTGCCTCCTGGGTTCAAGCATTCTCCTGCCTCAGCCTCCTGAGTAGCTGGGACT  
ACTACAAAGGCGTGAGCACCGCGCCGGGCGTGAGTTATATTTTCAAGGCTAGAATTGA  
CAGAACTGGGTTGATGAGAATA

>465

CAAGCATTCTCCTGCCTCAGCCTCCTGAGTAGCTGGGACTACTACAAAGGCGTGAGC  
ACCGCGCCGGGCGTGAGTTATATTTTCAAGGCTAGAATTGACAGAACTGGGTTGATG  
AGAATAGTTGATTAGCAGGCAGGG

>466

CTACTACAAAGGCGTGAGCACCGCGCCGGGCGTGAGTTATATTTTCAAGGCTAGAATT  
GACAGAACTGGGTTGATGAGAATAGTTGATTAGCAGGCAGGGTGCCAGGGAGGGTG  
TTGAGCAGAACAGAGGGGGGACTGT

>467

GTGAGCACCGCGCCGGGCGTGAGTTATATTTTCAAGGCTAGAATTGACAGAACTGGG  
TTGATGAGAATAGTTGATTAGCAGGCAGGGTGCCAGGGAGGGTGTGAGCAGAACAG  
AGGGGGGACTGTGCTTTATTTTAAA

>468

CGTGAGTTATATTTTCAAGGCTAGAATTGACAGAACTGGGTTGATGAGAATAGTTGAT  
TAGCAGGCAGGGTGCCAGGGAGGGTGTGAGCAGAACAGAGGGGGGACTGTGCTTTA  
TTTTAAAATTTTATTGAGACACA

>469

GGGTTGATGAGAATAGTTGATTAGCAGGCAGGGTGCCAGGGAGGGTGTGAGCAGAA  
CAGAGGGGGGACTGTGCTTTATTTTAAAATTTTATTGAGACACAGCATATAAAGTATAC  
CCAAATCTTAAGGGTATAACATA

>470

AGGGTGTGAGCAGAACAGAGGGGGGACTGTGCTTTATTTTAAAATTTTATTGAGAC  
ACAGCATATAAAGTATACCCAAATCTTAAGGGTATAACATAATGAATTTCACTATCAAGA  
TAAAGATTTAGAACATTTATAG

>471

AGGGGGGACTGTGCTTTATTTTAAAATTTTATTGAGACACAGCATATAAAGTATACCCA  
AATCTTAAGGGTATAACATAATGAATTTCACTATCAAGATAAAGATTTAGAACATTTATA  
GTTTTCTTGCTCCTTTCA

>472

AGTATACCCAAATCTTAAGGGTATAACATAATGAATTTCACTATCAAGATAAAGATTTAG  
AACATTTATAGTTTTCTTGCTCCTTTAGGCAATACCTAAAGGTATTTACCTGTCTTT  
TGATAACCTCCTCCACATC

>473

CAAATCTTAAGGGTATAACATAATGAATTTCACTATCAAGATAAAGATTTAGAACATTTA  
TAGTTTTCTTGCTCCTTTAGGCAATACCTAAAGGTATTTACCTGTCTTTGATAAC  
CTCCTCCACATCTCCTCTG

>474

ATTTCACTATCAAGATAAAGATTTAGAACATTTATAGTTTTCTTGCTCCTTTAGGCA  
ATACCTAAAGGTATTTACCTGTCTTTGATAACCTCCTCCACATCTCCTCTGGTTCCTT  
TAAACAGGGAATGCGTTGA

>475

GTGCTCCTTTAGGCAATACCTAAAGGTATTTACCTGTCTTTGATAACCTCCTCCACA  
TCTTCTCTGGTTCCTTTAACAGGGAATGCGTTGAATATGTCAAGAGCTTCAATATCCC  
TCTACTCGTGCTGGGTGGTG

>476

TAAAGGTATTTACCTGTCTTTGATAACCTCCTCCACATCTCCTCTGGTTCCTTTAAC  
AGGGAATGCGTTGAATATGTCAAGAGCTTCAATATCCCTCTACTCGTGCTGGGTGGTGG  
TGGTTACTGTCCGAAATG

>477

ACATCTCCTCTGGTTCCTTTAACAGGGAATGCGTTGAATATGTCAAGAGCTTCAATAT  
CCCTCTACTCGTGCTGGGTGGTGGTTATACTGTCCGAAATGTTGCCCGCTGCTGGT  
GAGCACTCCTGATTTCTC

>478

CCTCTGGTTCCTTTAACAGGGAATGCGTTGAATATGTCAAGAGCTTCAATATCCCTCTA  
CTCGTGCTGGGTGGTGGTTATACTGTCCGAAATGTTGCCCGCTGCTGGTGAGCACT  
CTCCTGATTTCTCCCTGTT

>479

CGTTGAATATGTCAAGAGCTTCAATATCCCTCTACTCGTGCTGGGTGGTGGTTATAC  
TGTCGAAATGTTGCCCGCTGCTGGTGAGCACTCCTGATTTCTCCCTGTTGTCCA  
GTGTGAGCTAGGGTGTCCCTC

>480

TGGGTGGTGGTGGTTATACTGTCCGAAATGTTGCCCGCTGCTGGTGAGCACTCCTCTGA

TTTCCTCCCCTGTTGTCCAGTGTGAGCTAGGGTGTCCCTCAGATATGGCCACATGGGCC  
CTTCAGCCCCTTGGTCAGCCT

>481

GGTGGTTATACTGTCCGAAATGTTGCCCGCTGCTGGTGAGCACTCTCCTGATTTCTCC  
CCTGTTGTCCAGTGTGAGCTAGGGTGTCCCTCAGATATGGCCACATGGGCCCTTCAGCC  
CACTTGGTCAGCCTGCTCCCCT

>482

CCTCCCCTGTTGTCCAGTGTGAGCTAGGGTGTCCCTCAGATATGGCCACATGGGCCCTT  
CAGCCCCTTGGTCAGCCTGCTCCCCTCTGCTGGTTGGTTTCAGGACATATGAGACATC  
GCTGCTGGTAGAAGAGGCCATT

>483

GCTAGGGTGTCCCTCAGATATGGCCACATGGGCCCTTCAGCCCCTTGGTCAGCCTGCT  
CCCCTCTGCTGGTTGGTTTCAGGACATATGAGACATCGCTGCTGGTAGAAGAGGCCATT  
AGTGAGGAGCTTCCCTATAGTG

>484

CCTTCAGCCCCTTGGTCAGCCTGCTCCCCTCTGCTGGTTGGTTTCAGGACATATGAGA  
CATCGCTGCTGGTAGAAGAGGCCATTAGTGAGGAGCTTCCCTATAGTGGTAAGGACAC  
CCACAACACCCATAACAGGAAG

>485

TCAGCCTGCTCCCCTCTGCTGGTTGGTTTCAGGACATATGAGACATCGCTGCTGGTAGA  
AGAGGCCATTAGTGAGGAGCTTCCCTATAGTGGTAAGGACACCCACAACACCCCATAA  
CAGGAAGGCCATTCTCACCAGAT

>486

CTGGTTGGTTTCAGGACATATGAGACATCGCTGCTGGTAGAAGAGGCCATTAGTGAGG  
AGCTTCCCTATAGTGGTAAGGACACCCACAACACCCATAACAGGAAGGCCATTCTCA  
CCAGATTCCAGAATGACCTGGTTT

>487

GTTGGTTTCAGGACATATGAGACATCGCTGCTGGTAGAAGAGGCCATTAGTGAGGAGC  
TTCCCTATAGTGGTAAGGACACCCACAACACCCATAACAGGAAGGCCATTCTCACCA  
GATTCCAGAATGACCTGGTTTGAA

>488

TATAGTGGTAAGGACACCCACAACACCCATAACAGGAAGGCCATTCTCACCAGATTC  
CAGAATGACCTGGTTTGAAGGCACATGGGAAATTTTACTCTCAGAGCTCTGCAGAC  
TAAACCCCTGGGCTCAGAGCAGGG

>489

TTTACTCTCAGAGCTCTGCAGACTAAACCCCTGGGCTCAGAGCAGGGAAGAGATTG  
GGCAGCTATTATGTAGGTGCTCTGGATGGGAAGGAAAAGATTGGGAAGTCTTGTTAG  
CTGCCTTTCTCAGTCTGAGCCATA

>490

CACTCTCAGAGCTCTGCAGACTAAACCCCTGGGCTCAGAGCAGGGAAGAGATTGGGC  
AGCTATTATGTAGGTGCTCTGGATGGGAAGGAAAAGATTGGGAAGTCTTGTTAGCTG  
CCTTTCTCAGTCTGAGCCATACTTT

>491

GCTCAGAGCAGGGAAGAGATTGGGCAGCTATTATGTAGGTGCTCTGGATGGGAAGGAA  
AAAGATTGGGAAGTCTTGTTAGCTGCCTTTCTCAGTCTGAGCCATACTTTCTCCTCTCC  
TCCCAAGAATACTTCGAGTACT

>492

GAGCAGGGAAGAGATTGGGCAGCTATTATGTAGGTGCTCTGGATGGGAAGGAAAAAG  
ATTGGGAAGTCTTGTTAGCTGCCTTTCTCAGTCTGAGCCATACTTTCTCCTCTCCTCCCC  
AAGAATACTTCGAGTACTTTGCC

>493

GGCAGCTATTATGTAGGTGCTCTGGATGGGAAGGAAAAAGATTGGGAAGTCTTGTTAG  
CTGCCTTTCTCAGTCTGAGCCATACTTTCTCCTCTCCTCCCCAAGAATACTTCGAGTACT  
TTGCCCCAGACTTCACACTTCA

>494

GGGAAGTCTTGTTAGCTGCCTTTCTCAGTCTGAGCCATACTTTCTCCTCTCCTCCCCAA  
GAATACTTCGAGTACTTTGCCCCAGACTTCACACTTCATCCAGATGTCAGCACCCGCAT  
CGAGAATCAGAACTCACGCCAG

>495

CCATACTTTCTCCTCTCCTCCCCAAGAATACTTCGAGTACTTTGCCCCAGACTTCACACT  
TCATCCAGATGTCAGCACCCGCATCGAGAATCAGAACTCACGCCAGGTCAGCAGCTCA  
GAAAAGCTGAGCACAAACTTCT

>496

CCGCATCGAGAATCAGAACTCACGCCAGGTCAGCAGCTCAGAAAAGCTGAGCACAAA  
CTTCTCCTGAAAGGTGGAGCCAGGAGAGGTCAAAGATGTGGGAAGTAGGAAAAACC  
AAAGAGAAGGAAGTTCTAAGCCATCA

>497

AACTCACGCCAGGTCAGCAGCTCAGAAAAGCTGAGCACAAACTTCTCCTGAAAGGTG  
GAGCCCAGGAGAGGTCAAAGATGTGGGAAGTAGGAAAAACCAAAGAGAAGGAAGTT  
CTAAGCCATCACAGTCACTGTTATTGA

>498

GCAGCTCAGAAAAGCTGAGCACAAACTTCTCCTGAAAGGTGGAGCCCAGGAGAGGTG  
AAAGATGTGGGAAGTAGGAAAAACCAAAGAGAAGGAAGTTCTAAGCCATCACAGTCA  
CTGTTATTGACTAGGAGGCAGTCCAG

>499

ACTTCTCCTGAAAGGTGGAGCCCAGGAGAGGTCAAAGATGTGGGAAGTAGGAAAAAC  
CAAAGAGAAGGAAGTTCTAAGCCATCACAGTCACTGTTATTGACTAGGAGGCAGTCCA  
GTTTAAAGTAGAGGCAGTTGGGGTT

>500

GGAGCCCAGGAGAGGTCAAAGATGTGGGAAGTAGGAAAAACCAAAGAGAAGGAAGT  
TCTAAGCCATCACAGTCACTGTTATTGACTAGGAGGCAGTCCAGTTTAAAGTAGAGGC  
AGTTGGGGTTGGTGGGGAGGGAGAGC

>501

TGGGAAGTAGGAAAAACCAAAGAGAAGGAAGTTCTAAGCCATCACAGTCACTGTTAT  
TACTAGGAGGCAGTCCAGTTTAAAGTAGAGGCAGTTGGGGTTGGTGGGGAGGGAGA  
GCTATCAGTTGGGGGACCTGAACTAG

>502

GAGAAGGAAGTTCTAAGCCATCACAGTCACTGTTATTGACTAGGAGGCAGTCCAGTTT  
AAAGTAGAGGCAGTTGGGGTTGGTGGGGAGGGAGAGCTATCAGTTGGGGGACCTGAA  
CTAGAGGTACCACTGAGATGAAAAAC

>503

GAAGTTCTAAGCCATCACAGTCACTGTTATTGACTAGGAGGCAGTCCAGTTTAAAGTA



GAGGCAGTTGGGGTTGGTGGGGAGGGAGAGCTATCAGTTGGGGGACCTGAACTAGAG  
GTACCACTGAGATGAAAACCAAGTAT

>504

TGTTATTGACTAGGAGGCAGTCCAGTTTAAAGTAGAGGCAGTTGGGGTTGGTGGGGAG  
GGAGAGCTATCAGTTGGGGGACCTGAACTAGAGGTACCACTGAGATGAAAACCAAGTAT  
GGTAGGGGTAAAAGGCAGCTAGGA

>505

TGGGGTTGGTGGGGAGGGAGAGCTATCAGTTGGGGGACCTGAACTAGAGGTACCACT  
GAGATGAAAACCAAGTATGGTAGGGGTAAAAGGCAGCTAGGAGATTCCATGTCCTGGGA  
ATCTCTGAAACTGCTCACTCTGTA

>506

TTGGTGGGGAGGGAGAGCTATCAGTTGGGGGACCTGAACTAGAGGTACCACTGAGAT  
GAAAACCAAGTATGGTAGGGGTAAAAGGCAGCTAGGAGATTCCATGTCCTGGGAATCTC  
TGAAACTGCTCACTCTGTATTCTT

>507

ACCTGAACTAGAGGTACCACTGAGATGAAAACCAAGTATGGTAGGGGTAAAAGGCAGCT  
AGGAGATTCCATGTCCTGGGAATCTCTGAAACTGCTCACTCTGTATTCTCATTCCA  
ACCAAGTATCTGGACCAGATCCGC

>508

CCAGTATGGTAGGGGTAAAAGGCAGCTAGGAGATTCCATGTCCTGGGAATCTCTGGAA  
ACTGCTCACTCTGTATTCTCATTCCAACCAAGTATCTGGACCAGATCCGCCAGACAAT  
CTTTGAAAACCTGAAGATGCTGA

>509

GGCAGCTAGGAGATTCCATGTCCTGGGAATCTCTGAAACTGCTCACTCTGTATTCTC  
ATTTCCAACCAAGTATCTGGACCAGATCCGCCAGACAATCTTTGAAAACCTGAAGATGCT  
GAACCATGCACCTAGTGTCCAG

>510

TCCAACCAAGTATCTGGACCAGATCCGCCAGACAATCTTTGAAAACCTGAAGATGCTGA  
ACCATGCACCTAGTGTCCAGATTCATGACGTGCCTGCAGACCTCCTGACCTATGACAGG  
ACTGATGAGGCTGATGCAGAGGA

>511

CAACCAAGTATCTGGACCAGATCCGCCAGACAATCTTTGAAAACCTGAAGATGCTGAAC  
CATGCACCTAGTGTCCAGATTCATGACGTGCCTGCAGACCTCCTGACCTATGACAGGAC  
TGATGAGGCTGATGCAGAGGAGA

>512

CCAGATCCGCCAGACAATCTTTGAAAACCTGAAGATGCTGAACCATGCACCTAGTGTGTC  
CAGATTCATGACGTGCCTGCAGACCTCCTGACCTATGACAGGACTGATGAGGCTGATG  
CAGAGGAGAGGGTCTGAGGAGA

>513

CAGATTCATGACGTGCCTGCAGACCTCCTGACCTATGACAGGACTGATGAGGCTGATG  
CAGAGGAGAGGGTCTGAGGAGAACTATAGCAGGTCTGGGAGCAGGGACTTCAGCC  
TACTTTCAATAGGCTTGCTGGGGAG

>514

GTCCTGAGGAGAACTATAGCAGGTCTGGGAGCAGGGACTTCAGCCTACTTTCAATAGG  
CTTGCTGGGGAGGTTTAAAAGGGAAAAAGTAAATGGGAAGGTATTAGTTAATTGCCT  
CTGGCTTACCTCCTTAGTCTGCT

>515

TAGCAGGTCTGGGAGCAGGGACTTCAGCCTACTTTCAATAGGCTTGCTGGGGAGGTTT  
AAAAGGGAAAAAGTAAATGGGAAGGTATTAGTTAATTGCCTCTGGCTTACCTCCTTTA  
GTCTGCTACAATTCCTCACTCT

>516

GGACTTCAGCCTACTTTCAATAGGCTTGCTGGGGAGGTTTAAAAGGGAAAAAGTAAAT  
GGGAAGGTATTAGTTAATTGCCTCTGGCTTACCTCCTTTAGTCTGCTACAATTCCTCA  
CTCTTTTCTTTGTTATTTTAA

>517

TGGGGAGGTTTAAAAGGGAAAAAGTAAATGGGAAGGTATTAGTTAATTGCCTCTGGC  
TTACCTCCTTAGTCTGCTACAATTCCTCACTCTTTTCTTTGTTATTTTAAATGACAAAA  
GTAACACGTATTTATTGCAA

>518

GGAAGGTATTAGTTAATTGCCTCTGGCTTACCTCCTTTAGTCTGCTACAATTCCTCAC  
TCTTTTCTTTGTTATTTTAAATGACAAAAGTAACACGTATTTATTGCAAATTTTAAAC  
AGCACAAAATATGGTGTTG

>519

GCCTCTGGCTTACCTCCTTTAGTCTGCTACAATTCCTCACTCTTTTCTTTGTTATTTTA  
ATGACAAAAGTAACACGTATTTATTGCAAATTTTAAACAGCACCAAATATGGTGTT  
GGCGTTCACACAATCCCAGA

>520

GCTTACCTCCTTAGTCTGCTACAATTCCTCACTCTTTTCTTTGTTATTTTAAATGACAA  
AAGTAACACGTATTTATTGCAAATTTTAAACAGCACCAAATATGGTGTTGGCGTTC  
ACACAATCCCAGACCTATTC

>521

TTCTTTGTTATTTTAAATGACAAAAGTAACACGTATTTATTGCAAATTTTAAACAGCA  
CCAAAATATGGTGTTGGCGTTCACACAATCCCAGACCTATTCACAGGAGTAACCACTG  
TTAATAGTTTTTATTGTTTTG

>522

TTGCAAATTTTAAACAGCACCAAATATGGTGTTGGCGTTCACACAATCCCAGACCT  
ATTCCACAGGAGTAACCACTGTTAATAGTTTTTATTGTTTTGGATAGACCTTTTTCTATAG  
ATTGCAAATATACTATTCTG

>523

TTTAAACAGCACCAAATATGGTGTTGGCGTTCACACAATCCCAGACCTATTCCACAG  
GAGTAACCACTGTTAATAGTTTTTATTGTTTTGGATAGACCTTTTTCTATAGATTGCAAAT  
ATACTATTCTGTATGTACAT

>524

AGTAACCACTGTTAATAGTTTTTATTGTTTTGGATAGACCTTTTTCTATAGATTGCAAATA  
TACTATTCTGTATGTACATATAAACAACACATATACACTCATTTACAGTTTGTGTGGTTT  
TTGGTTTTCCGTAAATA

>525

ACCACTGTTAATAGTTTTTATTGTTTTGGATAGACCTTTTTCTATAGATTGCAAATATACT  
ATTCTGTATGTACATATAAACAACACATATACACTCATTTACAGTTTGTGTGGTTTTTGG  
TTTTTCCGTAAATACAAA

>526

CTTTTTCTATAGATTGCAAATATACTATTCTGTATGTACATATAAACAACACATATACAC

TCATTTACAGTTTGTGTGGTTTTGGTTTTCCGTAAATACAAATAGGGTCATTCTACGT  
ATGCTGCTTTACATCATAT

>527

TTCTATAGATTGCAAATATACTATTCTGTATGTACATATAAACAAACACATATACACTCAT  
TTACAGTTTGTGTGGTTTTGGTTTTCCGTAAATACAAATAGGGTCATTCTACGTATGC  
TGCTTTACATCATATAGCT

>528

CTATTCTGTATGTACATATAAACAAACACATATACACTCATTACAGTTTGTGTGGTTTT  
GGTTTTCCGTAAATACAAATAGGGTCATTCTACGTATGCTGCTTTACATCATATAGCTGT  
TTTCAGCTAGCTAATATA

>529

ACACATATACACTCATTACAGTTTGTGTGGTTTTGGTTTTCCGTAAATACAAATAGG  
GTCATTCTACGTATGCTGCTTTACATCATATAGCTGTTTCAGCTAGCTAATATAGATCTG  
CTTCAGTATTTATCAGCT

>530

GTGTGGTTTTGGTTTTCCGTAAATACAAATAGGGTCATTCTACGTATGCTGCTTTACA  
TCATATAGCTGTTTCAGCTAGCTAATATAGATCTGCTTCAGTATTTATCAGCTGTATAAT  
AATTTACTATGTGGATAG

>531

TAGGGTCATTCTACGTATGCTGCTTTACATCATATAGCTGTTTCAGCTAGCTAATATAGA  
TCTGCTTCAGTATTTATCAGCTGTATAATAATTTACTATGTGGATAGATTATTTCCATTT  
TTTTGGTATTACAATAA

>532

GTATGCTGCTTTACATCATATAGCTGTTTCAGCTAGCTAATATAGATCTGCTTCAGTATT  
TTATCAGCTGTATAATAATTTACTATGTGGATAGATTATTTCCATTTTTTGGTATTACAA  
TAATAATGTGGCAATGA

>533

ATATAGCTGTTTCAGCTAGCTAATATAGATCTGCTTCAGTATTTTATCAGCTGTATAATAA  
TTACTATGTGGATAGATTATTTCCATTTTTTGGTATTACAATAATAATGTGGCAATGA  
ACCCCTTACATTATAC

>534

AGATCTGCTTCAGTATTTTATCAGCTGTATAATAATTTACTATGTGGATAGATTATTTCCA  
TTTTTTGGTATTACAATAATAATGTGGCAATGAACCCCTTACATTATACATCTTTGCAT  
TCTTGTGAGTGGGT

>535

TTTATCAGCTGTATAATAATTTACTATGTGGATAGATTATTTCCATTTTTTGGTATTACA  
ATAATAATGTGGCAATGAACCCCTTACATTATACATCTTTGCATTCTGTTTGTGAGTGGG  
TTAGATAGTAGAATGGTT

>536

TTCCATTTTTTGGTATTACAATAATAATGTGGCAATGAACCCCTTACATTATACATCTT  
TGCATTCTGTTTGTGAGTGGGTTAGATAGTAGAATGGTTGCTGCTAGGTCAAAGGCTGTG  
TGCATTAATTTTTTTTTTTT

>537

TTTTTTGGTATTACAATAATAATGTGGCAATGAACCCCTTACATTATACATCTTTGCATT  
CTGTTTGTGAGTGGGTTAGATAGTAGAATGGTTGCTGCTAGGTCAAAGGCTGTGTGCATT  
AATTTTTTTTTTTTTTTT

>538

TTGGTATTACAATAATAATGTGGCAATGAACCCCTTACATTATACATCTTTGCATTCTTG  
TTTGAGTGGGTTAGATAGTAGAATGGTTGCTGCTAGGTCAAAGGCTGTGTGCATTAATT  
TTTTTTTTTTTTTTTTTTTT

>539

ACAATAATAATGTGGCAATGAACCCCTTACATTATACATCTTTGCATTCTTGTTGAGT  
GGGTTAGATAGTAGAATGGTTGCTGCTAGGTCAAAGGCTGTGTGCATTAATTTTTTTTT  
TTTTTTTTTTTTTTGAGATGGA

>540

GAACCCCTTACATTATACATCTTTGCATTCTTGTTGAGTGGGTTAGATAGTAGAATGG  
TTGCTGCTAGGTCAAAGGCTGTGTGCATTAATTTTTTTTTTTTTTTTTTTTTTTTGGAGATGG  
AGTCTCACTCTGTTGCCAGG

>541

GTAGAATGGTTGCTGCTAGGTCAAAGGCTGTGTGCATTAATTTTTTTTTTTTTTTTTTTTT  
TGAGATGGAGTCTCACTCTGTTGCCAGGCTGGAGTGCAGTGGCTAATCCCGGCTCACT  
GCAACCTCCGCCTCCCAGGTT

>542

TGCTGCTAGGTCAAAGGCTGTGTGCATTAATTTTTTTTTTTTTTTTTTTTTTTTGGAGATGGA  
GTCTCACTCTGTTGCCAGGCTGGAGTGCAGTGGCTAATCCCGGCTCACTGCAACCTCC  
GCCTCCCAGGTTCAAGCGATTC

>543

GGAGTCTCACTCTGTTGCCAGGCTGGAGTGCAGTGGCTAATCCCGGCTCACTGCAACC  
TCCGCCTCCCAGGTTCAAGCGATTCTCTGCCTCAGCCTCCTCAGTAGCTGAGATTACA  
GGCATGTGCCACCACACCCGGCT

>544

GTGGCTAATCCCGGCTCACTGCAACCTCCGCCTCCCAGGTTCAAGCGATTCTCCTGCCT  
CAGCCTCCTCAGTAGCTGAGATTACAGGCATGTGCCACCACACCCGGCTAACTTTAGTA  
TTTTTAGTAGAGACGGGGTTTC

>545

GCAACCTCCGCCTCCCAGGTTCAAGCGATTCTCCTGCCTCAGCCTCCTCAGTAGCTGA  
GATTACAGGCATGTGCCACCACACCCGGCTAACTTTAGTATTTTTAGTAGAGACGGGGT  
TTCACCATGTTGGCCAGGATGGT

>546

CGATTCTCCTGCCTCAGCCTCCTCAGTAGCTGAGATTACAGGCATGTGCCACCACACCC  
GGCTAACTTTAGTATTTTTAGTAGAGACGGGGTTTCACCATGTTGGCCAGGATGGTCTT  
GATCTCTTGACCTTGATCCA

>547

CCTCAGTAGCTGAGATTACAGGCATGTGCCACCACACCCGGCTAACTTTAGTATTTTTA  
GTAGAGACGGGGTTTCACCATGTTGGCCAGGATGGTCTTGATCTCTTGACCTTGATC  
CACCTGCCTTGGCCTCCCAAAG

>548

TGAGATTACAGGCATGTGCCACCACACCCGGCTAACTTTAGTATTTTTAGTAGAGACGG  
GGTTTCACCATGTTGGCCAGGATGGTCTTGATCTCTTGACCTTGATCCACCTGCCTT  
GGCCTCCCAAAGTGCTGGGATT

>549

ATGTGCCACCACACCCGGCTAACTTTAGTATTTTTAGTAGAGACGGGGTTTCACCATGT

TGCCAGGATGGTCTTGATCTCTTGACCTTGATCCACCTGCCTTGGCCTCCCAAAGT  
GCTGGGATTACAGGTGTGAGCT

>550

GGTTTCACCATGTTGGCCAGGATGGTCTTGATCTCTTGACCTTGATCCACCTGCCTT  
GGCCTCCCAAAGTGCTGGGATTACAGGTGTGAGCTACCACGCCCGGCTTTTGAGAATA  
CTTTTTCAAAAAGAAAGAAACCA

>551

GCCAGGATGGTCTTGATCTCTTGACCTTGATCCACCTGCCTTGGCCTCCCAAAGTGC  
TGGGATTACAGGTGTGAGCTACCACGCCCGGCTTTTGAGAATACTTTTTCAAAAAGAA  
AGAAACCAATATTGAGTACCTGT

>552

GATTACAGGTGTGAGCTACCACGCCCGGCTTTTGAGAATACTTTTTCAAAAAGAAAGA  
AACCAATATTGAGTACCTGTTGGGCCCTGTTTGGCTTTCACATCCATTCTTTCATATGG  
GTTTATAATACCACGTCACTCT

>553

AGGTGTGAGCTACCACGCCCGGCTTTTGAGAATACTTTTTCAAAAAGAAAGAAACCAA  
TATTGAGTACCTGTTGGGCCCTGTTTGGCTTTCACATCCATTCTTTCATATGGGTTTATA  
ATACCACGTCACTCTTCTTAA

>554

AAAAGAAAGAAACCAATATTGAGTACCTGTTGGGCCCTGTTTGGCTTTCACATCCATT  
TTTTCATATGGGTTTATAATACCACGTCACTCTTCTTAAAATTAATACTCTCTTTACCT  
GCACTTAGAAGAAAATCCAA

>555

AATATTGAGTACCTGTTGGGCCCTGTTTGGCTTTCACATCCATTCTTTCATATGGGTTTA  
TAATACCACGTCACTCTTCTTAAAATTAATACTCTCTTTACCTTGCACTTAGAAGAAA  
ATCCAAAATTTTACTGTGG

>556

CCACGTCACTCTTCTTAAAATTAATACTCTCTTTACCTTGCACTTAGAAGAAAATCCA  
AAATTTTACTGTGGCTTAAAAGGTCCTGCATGCTAGCCCTTACCTACATCCAGGATC  
TCATCTCTAACTACTCTCTCC

>557

CTTAAAATTAATACTCTCTTTACCTTGCACTTAGAAGAAAATCCAAAATTTTACTGT  
GGCTTAAAAGGTCCTGCATGCTAGCCCTTACCTACATCCAGGATCTCATCTCTAACTA  
CTCTCTCCATGCACAGTGCTC

>558

AAAAGGTCCTGCATGCTAGCCCTTACCTACATCCAGGATCTCATCTCTAACTACTCTCC  
TCCATGCACAGTGCTCCCGGCTGCTCTGGCCTCCTGTTCTTACTGGAATACATCAGTC  
TCTTCCATTTTCATGACCTCT

>559

CATGCTAGCCCTTACCTACATCCAGGATCTCATCTCTAACTACTCTCTCCATGCACAGT  
GCTCCCGGCTGCTCTGGCCTCCTGTTCTTACTGGAATACATCAGTCTCTTCCATTTCA  
TGACCTCTGTAGTTGGTTTT

>560

CCTACATCCAGGATCTCATCTCTAACTACTCTCTCCATGCACAGTGCTCCCGGCTGTCC  
TGGCCTCCTGTTCTTACTGGAATACATCAGTCTCTTCCATTTTCATGACCTCTGTAGTT  
GGTTTTCTTGCAGCTTGGAA

>561

TCTAACTACTCTCCTCCATGCACAGTGCTCCCGGCTGCCTGGCCTCCTTGTTCTTACTG  
GAATACATCAGTCTCTTTCCATTTTCATGACCTCTGTAGTTGGTTTTCTTGCAGCTTGGAA  
TGGCCTTCTGAAGTCTTTG

>562

GTGCTCCCGGCTGCCTGGCCTCCTTGTTCTTACTGGAATACATCAGTCTCTTTCCATTT  
CATGACCTCTGTAGTTGGTTTTCTTGCAGCTTGGAAATGGCCTTCTGAAGTCTTTGCCT  
GCTTAGCTCCTCCTCAGACTT

>563

CTCCCGGCTGCCTGGCCTCCTTGTTCTTACTGGAATACATCAGTCTCTTTCCATTTTCAT  
GACCTCTGTAGTTGGTTTTCTTGCAGCTTGGAAATGGCCTTCTGAAGTCTTTGCCTGCT  
TAGCTCCTCCTCAGACTTTAG

>564

TACATCAGTCTCTTTCCATTTTCATGACCTCTGTAGTTGGTTTTCTTGCAGCTTGGAAATGG  
CCTTCTGAAGTCTTTGCCTGCTTAGCTCCTCCTCAGACTTTAGGTCTTATGTCCAATA  
GTCCTGTCTGAAATTCACC

>565

GTTGGTTTTCTTGCAGCTTGGAAATGGCCTTCTGAAGTCTTTGCCTGCTTAGCTCCTCC  
TCAGACTTTAGGTCTTATGTCCAATAGTCTGTCTGAAATTCACCCTTTTCCTCTCAT  
CACCTTCAGTCTATCACTTC

>566

TTCTTGCAGCTTGGAAATGGCCTTCTGAAGTCTTTGCCTGCTTAGCTCCTCCTCAGACT  
TTAGGTCTTATGTCCAATAGTCTGTCTGAAATTCACCCTTTTCCTCTCATCACCTTC  
AGTCTATCACTTCATTTTAT

>567

CCTCAGACTTTAGGTCTTATGTCCAATAGTCTGTCTGAAATTCACCCTTTTCCTCTC  
ATCACCTTCAGTCTATCACTTCATTTTATTAATTGACTCTCCATCATCTGAAATTATTAT  
ATTTATTTACTTTGTTAG

>568

AATAGTCTGTCTGAAATTCACCCTTTTCCTCTCATCACCTTCAGTCTATCACTTCAT  
TTTATTAATTGACTCTCCATCATCTGAAATTATTATATTTACTTTGTTAGTTACTAGT  
CTCATTTATTAGGTAAG

>569

CTTCAGTCTATCACTTCATTTTATTAATTGACTCTCCATCATCTGAAATTATTATATTTA  
TTACTTTGTTAGTTACTAGTCTCATTTATTAGGTAAGCTTTTTGAGGATAGACAACCTT  
GTCCAGCTTGTTACTCTA

>570

AGTCTATCACTTCATTTTATTAATTGACTCTCCATCATCTGAAATTATTATATTTATTTA  
CTTTGTTAGTTACTAGTCTCATTTATTAGGTAAGCTTTTTGAGGATAGACAACCTTGTCC  
AGCTTGTTACTCTACTGT

>571

ATTATATTTATTTACTTTGTTAGTTACTAGTCTCATTTATTAGGTAAGCTTTTTGAGGATAG  
ACAACCTTGCCAGCTTGTTACTCTACTGTATTGCTAAGGTTTATGACAGTGTCTGTATA  
GAGTAGTTCCTTAATGTT

>572

ATTTACTTTGTTAGTTACTAGTCTCATTTATTAGGTAAGCTTTTTGAGGATAGACAACCTT

GTCCAGCTTGTTACTCTACTGTATTGCTAAGGTTTATGACAGTGTCTGTATAGAGTAGTT  
CCTTAATGTTTATTTGATA

>573

CTCATTATTAGGTAAGCTTTTTGAGGATAGACAACCTTGCCAGCTTGTTACTCTACTG  
TATTGCTAAGGTTTATGACAGTGTCTGTATAGAGTAGTTCCTTAATGTTTATTTGATACGT  
GAATGGGTGAATGAATAGC

>574

GTAAGCTTTTTGAGGATAGACAACCTTGCCAGCTTGTTACTCTACTGTATTGCTAAGG  
TTTATGACAGTGTCTGTATAGAGTAGTTCCTTAATGTTTATTTGATACGTGAATGGGTGA  
ATGAATAGCAGTCTCTACCAA

>575

GCTTTTTGAGGATAGACAACCTTGCCAGCTTGTTACTCTACTGTATTGCTAAGGTTTAT  
GACAGTGTCTGTATAGAGTAGTTCCTTAATGTTTATTTGATACGTGAATGGGTGAATGAA  
TAGCAGTCTCTACCAACAAG

>576

GAGGATAGACAACCTTGCCAGCTTGTTACTCTACTGTATTGCTAAGGTTTATGACAGT  
GTCTGTATAGAGTAGTTCCTTAATGTTTATTTGATACGTGAATGGGTGAATGAATAGCAG  
TCTCTACCAACAAGAGGAGGA

>577

CTTGCCAGCTTGTTACTCTACTGTATTGCTAAGGTTTATGACAGTGTCTGTATAGAGTA  
GTTCCCTTAATGTTTATTTGATACGTGAATGGGTGAATGAATAGCAGTCTCTACCAACAAG  
AGGAGGAGTGTTCTCAACG

>578

TTTATGACAGTGTCTGTATAGAGTAGTTCCTTAATGTTTATTTGATACGTGAATGGGTGA  
ATGAATAGCAGTCTCTACCAACAAGAGGAGGAGTGTTCTCAACGGGGCCTGAGAAA  
TGGCTTTGGAAAAGGGTGCTGGG

>579

GTAGTTCCTTAATGTTTATTTGATACGTGAATGGGTGAATGAATAGCAGTCTCTACCAAC  
AAGAGGAGGAGTGTTCTCAACGGGGCCTGAGAAAATGGCTTTGGAAAAGGGTGCTGG  
GAGAAGATTAGAACTTAGAGTGA

>580

GTTCCCTTAATGTTTATTTGATACGTGAATGGGTGAATGAATAGCAGTCTCTACCAACAAG  
AGGAGGAGTGTTCTCAACGGGGCCTGAGAAAATGGCTTTGGAAAAGGGTGCTGGGAG  
AAGATTAGAACTTAGAGTGAGAT

>581

GAATAGCAGTCTCTACCAACAAGAGGAGGAGTGTTCTCAACGGGGCCTGAGAAAATG  
GCTTTGGAAAAGGGTGCTGGGAGAAGATTAGAACTTAGAGTGAGATCCTGACCTCTCT  
CCCCTTGCTTTGCAGGCCAGAGGCA

>582

AGGAGTGTTCTCAACGGGGCCTGAGAAAATGGCTTTGGAAAAGGGTGCTGGGAGAAG  
ATTAGAACTTAGAGTGAGATCCTGACCTCTCTCCCCTTGCTTTGCAGGCCAGAGGCAC  
CCAATGAGTTCTATGATGGAGACCA

>583

AGAAGATTAGAACTTAGAGTGAGATCCTGACCTCTCTCCCCTTGCTTTGCAGGCCAGA  
GGCACCAATGAGTTCTATGATGGAGACCATGACAATGACAAGGAAAGCGATGTGGAG  
ATTTAAGAGTGCTTGGGATGCTG

>584

CTTGCTTTGCAGGCCAGAGGCACCCAATGAGTTCTATGATGGAGACCATGACAATGAC  
AAGGAAAGCGATGTGGAGATTTAAGAGTGGCTTGGGATGCTGTGTCCAAGGAATTC  
TTTTCACCTCTTGTTGGGCTGGA

>585

CAGAGGCACCCAATGAGTTCTATGATGGAGACCATGACAATGACAAGGAAAGCGATGT  
GGAGATTTAAGAGTGGCTTGGGATGCTGTGTCCAAGGAATTCTTTTCACCTCTTGGT  
TGGGCTGGAGGGAAAAGGAGTGG

>586

AGTTCTATGATGGAGACCATGACAATGACAAGGAAAGCGATGTGGAGATTTAAGAGTG  
GCTTGGGATGCTGTGTCCAAGGAATTCTTTTCACCTCTTGTTGGGCTGGAGGGAA  
AAGGAGTGGCTCCTAGAGTCCTGG

>587

AAGAGTGGCTTGGGATGCTGTGTCCAAGGAATTCTTTTCACCTCTTGTTGGGCTG  
GAGGGAAAAGGAGTGGCTCCTAGAGTCCTGGGGGTCACCCAGGGCTTTTGCTGACT  
CTGGGAAAGAGTCTGGAGACCACAT

>588

GGATGCTGTGTCCAAGGAATTCTTTTCACCTCTTGTTGGGCTGGAGGGAAAAGGA  
GTGGCTCCTAGAGTCCTGGGGTCACCCAGGGCTTTTGCTGACTCTGGGAAAGAGTC  
TGGAGACCACATTTGGTTCTCGAA

>589

CTGGAGGGAAAAGGAGTGGCTCCTAGAGTCCTGGGGGTCACCCAGGGCTTTTGCTG  
ACTCTGGGAAAGAGTCTGGAGACCACATTTGGTTCTGAACCATCTACCTGCTTTTCCT  
CTCTCTCCAAGGCCTGACAATGG

>590

GCTCCTAGAGTCCTGGGGGTCACCCAGGGCTTTTGCTGACTCTGGGAAAGAGTCTGG  
AGACCACATTTGGTTCTCGAACCATCTACCTGCTTTTCCTCTCTCCAAGGCCTGAC  
AATGGTACCTATTAGGGATGAGA

>591

AGTCTGGAGACCACATTTGGTTCTGAACCATCTACCTGCTTTTCCTCTCTCTCCAAG  
GCCTGACAATGGTACCTATTAGGGATGAGATACAGACAAGGATAGCTATCTGGGACATT  
ATTGGCAGTGGGCCCTGGAGGC

>592

CAAGGCCTGACAATGGTACCTATTAGGGATGAGATACAGACAAGGATAGCTATCTGGG  
ACATTATTGGCAGTGGGCCCTGGAGGCCAGTCCCTAGCCCCCTTGCCCCTATTCTT  
CCCTGCTTCCCTCGAACCCAGAG

>593

ACCTATTAGGGATGAGATACAGACAAGGATAGCTATCTGGGACATTATTGGCAGTGGGC  
CCTGGAGGCCAGTCCCTAGCCCCCTTGCCCCTATTCTTCCCTGCTTCCCTCGAACCC  
CAGAGATTTTTGAGGGATGAAC

>594

CCCTAGCCCCCTTGCCCCTATTCTTCCCTGCTTCCCTCGAACCCAGAGATTTTTGAG  
GGATGAACGGGTAGACAAGGACTGAGATTGCCTCTGACTTCCCTCCCCTGGGTTCT  
GACTTCTTCCCTCCCTTGCTTC

>595

ACCCAGAGATTTTTGAGGGATGAACGGGTAGACAAGGACTGAGATTGCCTCTGACTTC



CTCCTCCCCTGGGTTCTGACTTCTTCTCCCCTTGCTTCCAGGGAAGATGAAGAGAGA  
GAGATTTGGAAGGGGCTCTGGCTC

>596

GGGAAGATGAAGAGAGAGAGATTTGGAAGGGGCTCTGGCTCCCTAACACCTGAATCC  
CAGATGATGGGAAGTATGTTTTCAAGTGTGGGGAGGATATGAAAATGTTCTGTTCTCAC  
TTTTGGCTTTATGTCCATTTTACC

>597

AGATGAAGAGAGAGAGATTTGGAAGGGGCTCTGGCTCCCTAACACCTGAATCCCAGAT  
GATGGGAAGTATGTTTTCAAGTGTGGGGAGGATATGAAAATGTTCTGTTCTCACTTTTG  
GCTTTATGTCCATTTTACCACTG

>598

TCTGGCTCCCTAACACCTGAATCCCAGATGATGGGAAGTATGTTTTCAAGTGTGGGGA  
GGATATGAAAATGTTCTGTTCTCACTTTTGGCTTTATGTCCATTTTACCACTGTTTTTATC  
CAATAAACTAAGTCGGTATTT

>599

GGTAAAATCCCAGCTCAGGTGTTATATCCTTGCTGCTTCTGACAAATGAAACCAAGGTG  
TATTAATTAAGGTAATGCTAGCTACTACAATAAGCTGAAAAATATATAATAGCTAAAAGC  
TAGGGTGCCAGATTTAGGAAA

>600

AAGGTGTATTAATTAAGGTAATGCTAGCTACTACAATAAGCTGAAAAATATATAATAGCT  
AAAAGCTAGGGTGCCAGATTTAGGAAAATAAAAAACAAACAAAAACAATTGAAATTT  
GAATTTAGATAAACAATTTTTT

>601

GCCAGATTTAGGAAAATAAAAAACAAACAAAAACAATTGAAATTTGAATTTAGATAA  
ACAATTTTTTTAGTATAATATGTCCCATGCAATATTTGAGACATACTAAAAGGTTATTCA  
TTGTTTATCTGATATTCAAAT

>602

GGAAAATAAAAAACAAACAAAAACAATTGAAATTTGAATTTAGATAAACAATTTTTTT  
AGTATAATTATGTCCCATGCAATATTTGAGACATACTAAAAGGTTATTGTTTATCTG  
ATATTCAAATTTAACATTTT

>603

ATTTGAATTTAGATAAACAATTTTTTTAGTATAATTATGTCCCATGCAATATTTGAGACA  
TACTAAAAGGTTATTGTTTATCTGATATTCAAATTTAACATTTTCATTAATTTATTTT  
ATTTGGCAGCCCTATGG

>604

CAGATAAACAATTTTTTTAGTATAATTATGTCCCATGCAATATTTGAGACATACTAAAAG  
GTTATTGTTTATCTGATATTCAAATTTAACATTTTCATTAATTTATTTTATTTGGCAG  
CCCTATGGAAGACATCAA

>605

TTATCTGATATTCAAATTTAACATTTTCATTAATTTATTTTATTTGGCAGCCCTATGGAAGA  
CATCAAAAAGTTTATTTCTTATTTATATAAAGTCCAAAATAGATGTTTTTTAGTAGGCAGG  
CAGCTCTTCTAAGCGT

>606

ATTTTCATTAATTTATTTTATTTGGCAGCCCTATGGAAGACATCAAAAAGTTTATTTCTTAT  
TTATATAAAGTCCAAAATAGATGTTTTTTAGTAGGCAGGCAGCTCTTCTAAGCGTAAT  
TCAGGGCTCTGGTTCTGT

>607

TATTTTATTTGGCAGCCCTATGGAAGACATCAAAAGTTTATTTCTTATTTATATAAAGTCC  
AAAATAGATGTTTTTTAGTAGGCAGGCAGCTCTTCTCTAAGCGTAATTCAGGGCTCTGG  
GTTCTGTCCATCCTGGCCCT

>608

TTGGCAGCCCTATGGAAGACATCAAAAGTTTATTTCTTATTTATATAAAGTCCAAAATAG  
ATGTTTTTTAGTAGGCAGGCAGCTCTTCTCTAAGCGTAATTCAGGGCTCTGGGTTCTGT  
CCATCCTGGCCCTGACGTCTT

>609

AAGTTTATTTCTTATTTATATAAAGTCCAAAATAGATGTTTTTTAGTAGGCAGGCAGCTC  
TTCTCTAAGCGTAATTCAGGGCTCTGGGTTCTGTCCATCCTGGCCCTGACGTCTTTCATT  
GCTCAGCTTCTAAGATAGCT

>610

TTTTAGTAGGCAGGCAGCTCTTCTCTAAGCGTAATTCAGGGCTCTGGGTTCTGTCCATC  
CTGGCCCTGACGTCTTTCATTGCTCAGCTTCTAAGATAGCTCTATGCTCATGGGGTCAA  
GTCACAGGAAAGAAAAGGGAAT

>611

CTGGGTTCTGTCCATCCTGGCCCTGACGTCTTTCATTGCTCAGCTTCTAAGATAGCTCTA  
TGCTCATGGGGTCAAGTCACAGGAAAGAAAAGGGAATGTGGAGTTCCACTTGGGAGT  
TTTTATGGGCCAGTCCTGGAAGC

>612

TTCTGTCCATCCTGGCCCTGACGTCTTTCATTGCTCAGCTTCTAAGATAGCTCTATGCTC  
ATGGGGTCAAGTCACAGGAAAGAAAAGGGAATGTGGAGTTCCACTTGGGAGTTTTTAT  
GGGCCAGTCCTGGAAGCGGCAC

>613

GTCTTTCATTGCTCAGCTTCTAAGATAGCTCTATGCTCATGGGGTCAAGTCACAGGAAA  
GAAAAGGGAATGTGGAGTTCCACTTGGGAGTTTTTATGGGCCAGTCCTGGAAGCGGCA  
CAGAGGATTTCTGCTCACAATCT

>614

TCTAAGATAGCTCTATGCTCATGGGGTCAAGTCACAGGAAAGAAAAGGGAATGTGGAG  
TTCCACTTGGGAGTTTTTATGGGCCAGTCCTGGAAGCGGCACAGAGGATTTCTGCTCA  
CAATCTATTGGCCAGAACTCAATC

>615

GCGGCACAGAGGATTTCTGCTCACAATCTATTGGCCAGAACTCAATCACATGGCCTGC  
ACCTAACTGCAAGTTAAGCCAGAAAAATGTAGGTGTGCCAGGAAGAAGTTTGGGGA  
ACAGCTAGCCAGTCTCTGCCACACC

>616

CTGCTCACAATCTATTGGCCAGAACTCAATCACATGGCCTGCACCTAACTGCAAGTTAA  
GCCAGAAAAATGTAGGTGTGCCAGGAAGAAGTTTGGGGAACAGCTAGCCAGTCTCT  
GCCACACCTGGTAACAGCAGAGTG

>617

AGAACTCAATCACATGGCCTGCACCTAACTGCAAGTTAAGCCAGAAAAATGTAGGTGT  
GCCAGGAAGAAGTTTGGGGAACAGCTAGCCAGTCTCTGCCACACCTGGTAACAGCA  
GAGTGAATCTGTCAGTACTCGTGCC

>618

GCACCTAACTGCAAGTTAAGCCAGAAAAATGTAGGTGTGCCAGGAAGAAGTTTGGG

GAACAGCTAGCCAGTCTCTGCCACACCTGGTAACAGCAGAGTGAATCTGTCAGTACTC  
GTGCCTAATGCGTGTCTCATATGCT

>619

TAAGCCAGAAAAATGTAGGTGTGCCAGGAAGAAGTTTGGGGAACAGCTAGCCAGTC  
TCTGCCACACCTGGTAACAGCAGAGTGAATCTGTCAGTACTCGTGCCTAATGCGTGTCT  
CATATGCTAGTGCTGGATTCAGTC

>620

TGTGCCAGGAAGAAGTTTGGGGAACAGCTAGCCAGTCTCTGCCACACCTGGTAACA  
GCAGAGTGAATCTGTCAGTACTCGTGCCTAATGCGTGTCTCATATGCTAGTGCTGGATT  
CAGTCAGCAGTCCTACATCCGCTG

>621

GGAACAGCTAGCCAGTCTCTGCCACACCTGGTAACAGCAGAGTGAATCTGTCAGTACT  
CGTGCCTAATGCGTGTCTCATATGCTAGTGCTGGATTCAGTCAGCAGTCCTACATCCGCT  
GGGGTCCCTAGGAGGGGTCAGA

>622

AACAGCTAGCCAGTCTCTGCCACACCTGGTAACAGCAGAGTGAATCTGTCAGTACTCG  
TGCCTAATGCGTGTCTCATATGCTAGTGCTGGATTCAGTCAGCAGTCCTACATCCGCTG  
GGGTCCCTAGGAGGGGTCAGATG

>623

TCTCTGCCACACCTGGTAACAGCAGAGTGAATCTGTCAGTACTCGTGCCTAATGCGTGT  
CTCATATGCTAGTGCTGGATTCAGTCAGCAGTCCTACATCCGCTGGGGTCCCTAGGAGG  
GGTCAGATGCTCTCCTCTTTGC

>624

CAGTACTCGTGCCTAATGCGTGTCTCATATGCTAGTGCTGGATTCAGTCAGCAGTCCTA  
CATCCGCTGGGGTCCCTAGGAGGGGTCAGATGCTCTCCTCTTTGCCCTGAACTGGTTAG  
CTACTTCGGACTGGGATGACAA

>625

TAATGCGTGTCTCATATGCTAGTGCTGGATTCAGTCAGCAGTCCTACATCCGCTGGGGT  
CCCTAGGAGGGGTCAGATGCTCTCCTCTTTGCCCTGAACTGGTTAGCTACTTCGGACTG  
GGATGACAAGGCCATTGTGAGA

>626

TCAGTCAGCAGTCCTACATCCGCTGGGGTCCCTAGGAGGGGTCAGATGCTCTCCTCTTT  
GCCCTGAACTGGTTAGCTACTTCGGACTGGGATGACAAGGCCATTGTGAGAGTGATAA  
GCAATGTGATTCAAACAAATTCA

>627

GGAGGGGTCAGATGCTCTCCTCTTTGCCCTGAACTGGTTAGCTACTTCGGACTGGGAT  
GACAAGGCCATTGTGAGAGTGATAAGCAATGTGATTCAAACAAATTCATTTCACTTCAA  
TTCAATGCAGGTTTTTTTTTTTTT

>628

GTCAGATGCTCTCCTCTTTGCCCTGAACTGGTTAGCTACTTCGGACTGGGATGACAAGG  
CCATTGTGAGAGTGATAAGCAATGTGATTCAAACAAATTCATTTCACTTCAATTCAATG  
CAGGTTTTTTTTTTTTTTTGGAG

>629

TGACAAGGCCATTGTGAGAGTGATAAGCAATGTGATTCAAACAAATTCATTTCACTTCA  
ATTCATGCAGGTTTTTTTTTTTTTTTGGAGACGGGCTGTCATGCTGTTGCCAACCTGG  
AGAGCAGTGGCGCCATTACGGC

>630

GCAATGTGATTCAAACAAATTCATTTCACTTCAATTCAATGCAGGTTTTTTTTTTTTTTT  
GAGACGGGCTGTCATGCTGTTGCCAACCTGGAGAGCAGTGGCGCCATTACGGCTCAC  
TGCAGCCTCCTGGGCTCAAGCA

>631

CTTCAATTCAATGCAGGTTTTTTTTTTTTTTTGGAGACGGGCTGTCATGCTGTTGCCAAC  
CTGGAGAGCAGTGGCGCCATTACGGCTCACTGCAGCCTCCTGGGCTCAAGCAATTCTC  
CCTCCTCAGCTTCCCAAGTAGC

>632

GAGCAGTGGCGCCATTACGGCTCACTGCAGCCTCCTGGGCTCAAGCAATTCTCCCTCC  
TCAGCTTCCCAAGTAGCTGGGACTACAGGTGCATGCCACCATGTTTCAGCTCATTATTT  
TTTATTTTTTTGTAGACAGGAGG

>633

ACGGCTCACTGCAGCCTCCTGGGCTCAAGCAATTCTCCCTCCTCAGCTTCCCAAGTAG  
CTGGGACTACAGGTGCATGCCACCATGTTTCAGCTCATTATTTTTTTATTTTTTTGTAGAC  
AGGAGGTCTCACTATGTTACCC

>634

TCAGCTTCCCAAGTAGCTGGGACTACAGGTGCATGCCACCATGTTTCAGCTCATTATTT  
TTTATTTTTTTGTAGACAGGAGGTCTCACTATGTTACCCAGGCTGCTGTCCAAGTCCTG  
GGCTCACGTGATTCTCCCGCCT

>635

AGTAGCTGGGACTACAGGTGCATGCCACCATGTTTCAGCTCATTATTTTTTTATTTTTTTG  
TAGACAGGAGGTCTCACTATGTTACCCAGGCTGCTGTCCAAGTCCTGGGCTCACGTGA  
TTCTCCCGCCTCAGCCTCCCAA

>636

CACCATGTTTCAGCTCATTATTTTTTTATTTTTTTGTAGACAGGAGGTCTCACTATGTTACC  
CAGGCTGCTGTCCAAGTCCTGGGCTCACGTGATTCTCCCGCCTCAGCCTCCCAAATG  
CTGGGATTACAGGCGTAAGCC

>637

ATTTTTTATTTTTTTGTAGACAGGAGGTCTCACTATGTTACCCAGGCTGCTGTCCAAGTC  
CTGGGCTCACGTGATTCTCCCGCCTCAGCCTCCCAAATGCTGGGATTACAGGCGTAA  
GCCACCATGCCAGACAATTTA

>638

GGCTGCTGTCCAAGTCCTGGGCTCACGTGATTCTCCCGCCTCAGCCTCCCAAATGCT  
GGGATTACAGGCGTAAGCCACCATGCCAGACAATTAATAAATATTTATTAACCTTCT  
AGGATATTGAGAAAAGCTTGGT

>639

TAAAACCTTCTAGGATATTGAGAAAAGCTTGGTTCTAGGCCACTGGGGAAGACATCAAC  
TGAAACAGCCCAGTTATACTCTCAATTAGCTGTATAACAATTAATTCACAGATATCCTCA  
ACCCTTATCCATATCCCATTCA

>640

AGAAAAGCTTGGTTCTAGGCCACTGGGGAAGACATCAACTGAAACAGCCCAGTTATAC  
TCTCAATTAGCTGTATAACAATTAATTCACAGATATCCTCAACCCTTATCCATATCCCATT  
CATCTTTCAAAGGTTGGTGAA

>641

TAGCTGTATAACAATTAATTCACAGATATCCTCAACCCTTATCCATATCCCATTTCATCTTT

CAAAGGTTGGTGAAAACCTCATAGCACAAAGAATTCTGCCCTAAATGTTTGAATACAG  
AATGGTCCCCTCTCTCCCTAA

>642

CTTATCCATATCCCATTTCATCTTTCAAAGGTTGGTGAAAACCTCATAGCACAAAGAATTC  
TGCCCTAAATGTTTGAATACAGAATGGTCCCCTCTCTCCCTAATTCCTAAAATATTTGGT  
CTCTATGTTTCATTTCATTCAT

>643

TCATCTTTCAAAGGTTGGTGAAAACCTCATAGCACAAAGAATTCTGCCCTAAATGTTTG  
AATACAGAATGGTCCCCTCTCTCCCTAATTCCTAAAATATTTGGTCTCTATGTTTCATTTCAT  
TCATTTCATGCATGCATGCTT

>644

CACAAAGAATTCTGCCCTAAATGTTTGAATACAGAATGGTCCCCTCTCTCCCTAATTCCT  
AAAATATTTGGTCTCTATGTTTCATTTCATTTCATGCATGCATGCTTCAGTTAGTTCAT  
CGACAAACATTTACATCTA

>645

ATTCTGCCCTAAATGTTTGAATACAGAATGGTCCCCTCTCTCCCTAATTCCTAAAATATTT  
GGTCTCTATGTTTCATTTCATTTCATGCATGCATGCTTCAGTTAGTTCATCGACAAAC  
ATTTACATCTACTCTGTTT

>646

CCCTCTCTCCCTAATTCCTAAAATATTTGGTCTCTATGTTTCATTTCATTTCATGCATGC  
ATGCTTCAGTTAGTTCATCGACAAACATTTACATCTACTCTGTTTGACAGTGTGCTAGG  
CTCTGGGGCTTGGGAGTGG

>647

CTCTCCCTAATTCCTAAAATATTTGGTCTCTATGTTTCATTTCATTTCATGCATGCATGC  
TTTCAGTTAGTTCATCGACAAACATTTACATCTACTCTGTTTGACAGTGTGCTAGGCTCT  
GGGGCTTGGGAGTGGAAT

>648

CTATGTTTCATTTCATTTCATGCATGCATGCTTCAGTTAGTTCATCGACAAACATTTAC  
ATCTACTCTGTTTGACAGTGTGCTAGGCTCTGGGGCTTGGGAGTGGAATACTAAATTG  
AACAAGACTGAGGCCTTGCC

>649

TTCAGTTAGTTCATCGACAAACATTTACATCTACTCTGTTTGACAGTGTGCTAGGCTCTG  
GGGCTTGGGAGTGGAATACTAAATTGAACAAGACTGAGGCCTTGCCCTCCAGAAACT  
CACAAAGGAGTGGGTGGTCAGA

>650

CTGGGGCTTGGGAGTGGAATACTAAATTGAACAAGACTGAGGCCTTGCCCTCCAGAA  
ACTCACAAAGGAGTGGGTGGTCAGAATGCACATGACTCAGTCAGATATAAGGCAGATG  
GTGGTAAATACTATGATAAATGTT

>651

GGCTTGGGAGTGGAATACTAAATTGAACAAGACTGAGGCCTTGCCCTCCAGAAACTC  
ACAAAGGAGTGGGTGGTCAGAATGCACATGACTCAGTCAGATATAAGGCAGATGGTGG  
TAAATACTATGATAAATGTTTCAGA

>652

TTGAACAAGACTGAGGCCTTGCCCTCCAGAAACTCACAAAGGAGTGGGTGGTCAGAA  
TGCACATGACTCAGTCAGATATAAGGCAGATGGTGGTAAATACTATGATAAATGTTTCAG  
ATAGTGCTAAGGGCTTATGGAGA

>653

CTTCCAGAACTCACAAAGGAGTGGGTGGTCAGAATGCACATGACTCAGTCAGATATA  
AGGCAGATGGTGGTAAATACTATGATAAATGTTTCAGATAGTGCTAAGGGGCTTATGGAG  
AATGGGAGAAATTAATCTGACT

>654

GGAGTGGGTGGTCAGAATGCACATGACTCAGTCAGATATAAGGCAGATGGTGGTAAAT  
ACTATGATAAATGTTTCAGATAGTGCTAAGGGGCTTATGGAGAATGGGAGAAATTAATC  
TGAATCAAGGGTGGGTGGAGAAG

>655

GGTCAGAATGCACATGACTCAGTCAGATATAAGGCAGATGGTGGTAAATACTATGATAA  
ATGTTTCAGATAGTGCTAAGGGGCTTATGGAGAATGGGAGAAATTAATCTGACTCAAG  
GGTGGGTGGAGAAGATTACATCC

>656

TACTATGATAAATGTTTCAGATAGTGCTAAGGGGCTTATGGAGAATGGGAGAAATTAAT  
CTGACTCAAGGGTGGGTGGAGAAGATTACATCCAAGATCCAGCAATGACTTCCAGAAG  
AGACAAATGAACCTGGCCTGGCA

>657

ATGATAAATGTTTCAGATAGTGCTAAGGGGCTTATGGAGAATGGGAGAAATTAATCTGA  
CTCAAGGGTGGGTGGAGAAGATTACATCCAAGATCCAGCAATGACTTCCAGAAGAGA  
CAAATGAACCTGGCCTGGCAAGGG

>658

AGATTACATCCAAGATCCAGCAATGACTTCCAGAAGAGACAAATGAACCTGGCCTGGC  
AAGGGAGGCAGAGTCAAAGTGTCTGGCTCAAAGCCCACCACAGCCTTGGCTCACAGG  
CATCTCCCGGTCTTCCACTCACTCA

>659

CATCCAAGATCCAGCAATGACTTCCAGAAGAGACAAATGAACCTGGCCTGGCAAGGG  
AGGCAGAGTCAAAGTGTCTGGCTCAAAGCCCACCACAGCCTTGGCTCACAGGCATCT  
CCCGGTCTTCCACTCACTCAGTCCTT

>660

TGGCAAGGGAGGCAGAGTCAAAGTGTCTGGCTCAAAGCCCACCACAGCCTTGGCTCA  
CAGGCATCTCCCGGTCTTCCACTCACTCAGTCCTTTCAGGGAAAGGCACTGAGCTTTT  
CTCAAGGGAGAACTCCAAAGACGTC

>661

GTCAAAGTGTCTGGCTCAAAGCCCACCACAGCCTTGGCTCACAGGCATCTCCCGGTCT  
TCCACTCACTCAGTCCTTTCAGGGAAAGGCACTGAGCTTTTCTCAAGGGAGAACTCCA  
AAGACGTCTTTCATTTATCTTAC

>662

CCGGTCTTCCACTCACTCAGTCCTTTCAGGGAAAGGCACTGAGCTTTTCTCAAGGGAG  
AACTCCAAAGACGTCTTTCATTTATCTTACAAATCCACACAAATTTGCAATTCCACTC  
CACAAGATACGAGCATTGTCTT

>663

AAGACGTCTTTCATTTATCTTACAAATCCACACAAATTTGCAATTCCACTCCACAAGA  
TACGAGCATTGTCTTGCTATAATTTAATATGATTGGCATAAATTACCTGTTATCAAGTA  
AAATAGTTTCTTCTTATGGC

>664

TGCAATTCCACTCCACAAGATACGAGCATTGTCTTGCTATAATTTAATATGATTGGCAT

AAATTACCTGTTATCAAGTAAAATAGTTTCTTCTTATGGCTTGTGTGCCCTGACATACC  
ACTGCTATTTGAAAAGAGG

>665

CACTCCACAAGATACGAGCATTTGTCTTGTCTATAATTTAATATGATTGGCATAAATTACC  
TGTTATCAAGTAAAATAGTTTCTTCTTATGGCTTGTGTGCCCTGACATACCACTGCTAT  
TTGAAAAGAGGCTTCTCCA

>666

CTTGCTATAATTTAATATGATTGGCATAAATTACCTGTTATCAAGTAAAATAGTTTCTTC  
TTATGGCTTGTGTGCCCTGACATACCACTGCTATTTGAAAAGAGGCTTCTCCAGAAAC  
TCAGTGTCTGAGAGTACGTG

>667

GTTTCTTCTTATGGCTTGTGTGCCCTGACATACCACTGCTATTTGAAAAGAGGCTTCTC  
CAGAACTCAGTGTCTGAGAGTACGTGACTGGAAGGTGAGTGTGCTTACCCCTTGC  
GTTTTCTCCCTGTCAGGATAAA

>668

TTCTTCTTATGGCTTGTGTGCCCTGACATACCACTGCTATTTGAAAAGAGGCTTCTCCA  
GAACTCAGTGTCTGAGAGTACGTGACTGGAAGGTGAGTGTGCTTACCCCTTGCGT  
TTTCTCCCTGTCAGGATAAATG

>669

CTTGTGTGCCCTGACATACCACTGCTATTTGAAAAGAGGCTTCTCCAGAACTCAGT  
GTCTGAGAGTACGTGACTGGAAGGTGAGTGTGCTTACCCCTTGCGTTTTCTCCCTGT  
CAGGATAAATGGAATATTCTGCT

>670

CTGACATACCACTGCTATTTGAAAAGAGGCTTCTCCAGAACTCAGTGTCTGAGAGTA  
CGTACTGGAAGGTGAGTGTGCTTACCCCTTGCGTTTTCTCCCTGTCAGGATAAATG  
GAATATTCTGCTTTAAGGACCCT

>671

CATACCACTGCTATTTGAAAAGAGGCTTCTCCAGAACTCAGTGTCTGAGAGTACGTG  
ACTGGAAGGTGAGTGTGCTTACCCCTTGCGTTTTCTCCCTGTCAGGATAAATGGAAT  
ATTCTGCTTTAAGGACCCTAAGT

>672

AAGAGGCTTCTCCAGAACTCAGTGTCTGAGAGTACGTGACTGGAAGGTGAGTGTGTT  
GCTTACCCCTTGCGTTTTCTCCCTGTCAGGATAAATGGAATATTCTGCTTTAAGGACCCT  
AAGTCTGGCAATATCATGTTTTG

>673

GAGTGTGCTTACCCCTTGCGTTTTCTCCCTGTCAGGATAAATGGAATATTCTGCTTTA  
AGGACCCTAAGTCTGGCAATATCATGTTTTGTGAACAGCCAACACAGTAACTATGGTTG  
AGGCCTGTATTGATGAATGA

>674

CCTTGCGTTTTCTCCCTGTCAGGATAAATGGAATATTCTGCTTTAAGGACCCTAAGTCTG  
GCAATATCATGTTTTGTGAACAGCCAACACAGTAACTATGGTTGAGGCCTGTATTGAT  
GAATGAGGTTTTCATATGCTT

>675

GGATAAATGGAATATTCTGCTTTAAGGACCCTAAGTCTGGCAATATCATGTTTTGTGAAC  
AGCCAACACAGTAACTATGGTTGAGGCCTGTATTGATGAATGAGGTTTTCATATGCTT  
CTTTCACATCAGGAGAGAGAG

>676

GAATATTCTGCTTTAAGGACCCTAAGTCTGGCAATATCATGTTTTGTGAACAGCCAACA  
CAGTAACTATGGTTGAGGCCTGTATTCGATGAATGAGGTTTTCATATGCTTCTTTCACAT  
CAGGAGAGAGAGAGAGAAAAA

>677

CTTTAAGGACCCTAAGTCTGGCAATATCATGTTTTGTGAACAGCCAACACAGTAACTAT  
GGTTGAGGCCTGTATTCGATGAATGAGGTTTTCATATGCTTCTTTCACATCAGGAGAGA  
GAGAGAGAAAAAAAATAATAA

>678

TCTGGCAATATCATGTTTTGTGAACAGCCAACACAGTAACTATGGTTGAGGCCTGTATT  
CGATGAATGAGGTTTTCATATGCTTCTTTCACATCAGGAGAGAGAGAGAGAAAAAAA  
ATAATAAACTTGGTAGAGGACGT

>679

CGATGAATGAGGTTTTCATATGCTTCTTTCACATCAGGAGAGAGAGAGAGAAAAAAA  
ATAATAAACTTGGTAGAGGACGTGGAGTTGTATTCTGGACTATGGTGGCACCTCTAAG  
GAGCATGGTTTTCTTTTGCATG

>680

AGGTTTTCATATGCTTCTTTCACATCAGGAGAGAGAGAGAGAAAAAAAATAATAAAC  
TTGGTAGAGGACGTGGAGTTGTATTCTGGACTATGGTGGCACCTCTAAGGAGCATGGT  
TTTCTTTTGCATGGCTTTGTCC

>681

TCAGGAGAGAGAGAGAGAAAAAAAATAATAAACTTGGTAGAGGACGTGGAGTTGTA  
TTTCTGGACTATGGTGGCACCTCTAAGGAGCATGGTTTTCTTTTGCATGGCTTTGTCCA  
TTACTATAACACTCCTGTTATAA

>682

AAAAATAATAAACTTGGTAGAGGACGTGGAGTTGTATTCTGGACTATGGTGGCACCTC  
TAAGGAGCATGGTTTTCTTTTGCATGGCTTTGTCCATTACTATAACACTCCTGTTATAA  
AATAGCTGCCGTGGATTGAAA

>683

GGACGTGGAGTTGTATTCTGGACTATGGTGGCACCTCTAAGGAGCATGGTTTTCTTT  
TGCATGGCTTTGTCCATTACTATAACACTCCTGTTATAAAATAGCTGCCGTGGATTGAAA  
TCCATAATGTAACTCAAAG

>684

GACTATGGTGGCACCTCTAAGGAGCATGGTTTTCTTTTGCATGGCTTTGTCCACTACTA  
TAACACTCCTGTTATAAAATAGCTGCCGTGGATTGAAATCCATAATGTAACTCAAAG  
TTAAGCAGTCCGCTATTAAAC

>685

TAAGGAGCATGGTTTTCTTTTGCATGGCTTTGTCCATTACTATAACACTCCTGTTATAA  
AATAGCTGCCGTGGATTGAAATCCATAATGTAACTCAAAGTTAAGCAGTCCGCTATT  
AAACAGCATAAGAACTGTTA

>686

TTTGCATGGCTTTGTCCATTACTATAACACTCCTGTTATAAAATAGCTGCCGTGGATTGA  
AATCCATAATGTAACTCAAAGTTAAGCAGTCCGCTATTAAACAGCATAAGAACTGT  
TACCTATCCCCTCTTCTGGC

>687

ACTATAACACTCCTGTTATAAAATAGCTGCCGTGGATTGAAATCCATAATGTAACTCAA



AAGTTAAGCAGTCCGCTATTAACAGCATAAGAACTGTTACCTATCCCCTCTTCTGG  
CCCCCAACAAAGAAACAGCA

>688

TGCCGTGGATTGAAATCCATAATGTTAACTCAAAGTTAAGCAGTCCGCTATTAACAG  
CATAAGAACTGTTACCTATCCCCTCTTCTGGCCCCCAACAAAGAAACAGCAA  
GTTAAAAAGCCCATGTCTCCCC

>689

GCTATTAACAGCATAAGAACTGTTACCTATCCCCTCTTCTGGCCCCCAACAAAGA  
AACAGCAAAGTTAAAAAGCCCATGTCTCCCCATGAGGACTTGGGGTTAATTTCA  
GCATGGTGTCTGGGGATTATCT

>690

AAGAACTGTTACCTATCCCCTCTTCTGGCCCCCAACAAAGAAACAGCAAAGTT  
AAAAAGCCCATGTCTCCCCATGAGGACTTGGGGTTAATTTTCAGCATGGTGTCTGGG  
GATTCATCTGTGGGACTCCTATTA

>691

ACAAAGAAACAGCAAAGTTAAAAAGCCCATGTCTCCCCATGAGGACTTGGGGTT  
AATTTTCAGCATGGTGTCTGGGGATTCATCTGTGGGACTCCTATTACCCATAATAGGACT  
CATGCTGCTTCATTCATGCACA

>692

AAAGAAACAGCAAAGTTAAAAAGCCCATGTCTCCCCATGAGGACTTGGGGTTAAT  
TTTCAGCATGGTGTCTGGGGATTCATCTGTGGGACTCCTATTACCCATAATAGGACTCAT  
GCTGCTTCATTCATGCACACG

>693

GTTAAAAAGCCCATGTCTCCCCATGAGGACTTGGGGTTAATTTTCAGCATGGTGTCTG  
GGGATTCATCTGTGGGACTCCTATTACCCATAATAGGACTCATGCTGCTTCATTCATGC  
ACACGATATGGAAAATGCACC

>694

CCTATTACCCATAATAGGACTCATGCTGCTTCATTCATGCACACGATATGGAAAATGCA  
CCCTTCCCTAGTGATGAAATTTAGTTTTGAAATTGAGGCTAGCTTTTGCAGAACAAAG  
CAGATTCCCAGAAACACCAA

>695

TAGGACTCATGCTGCTTCATTCATGCACACGATATGGAAAATGCACCCTCCCTAGTGA  
TGAAATTTAGTTTTGAAATTGAGGCTAGCTTTTGCAGAACAAAGCAGATTCCCAGAA  
ACACCAAAACTATTCAATGTT

>696

TTAGTTTTGAAATTGAGGCTAGCTTTTGCAGAACAAAGCAGATTCCCAGAAACACCAA  
AACTATTCAATGTTGGCCTAGAGCCTGTGTGTCCGTGCTTAGGTGAGTATGTGTATCT  
GAAAGGGAGAAAATGCCTTCCTC

>697

AGGCTAGCTTTTGCAGAACAAAGCAGATTCCCAGAAACACCAAAACTATTCAATGTT  
GGCCTAGAGCCTGTGTGTCCGTGCTTAGGTGAGTATGTGTATCTGAAAGGGAGAAAAT  
GCCTTCTCTAAGTGCATGCCC

>698

AACAAAGCAGATTCCCAGAAACACCAAAACTATTCAATGTTGGCCTAGAGCCTGTGT  
GTCCGTGCTTAGGTGAGTATGTGTATCTGAAAGGGAGAAAATGCCTTCTCTAAGTGCG  
TATGCCCTCTCAAAGACAATAT

>699

GGCCTAGAGCCTGTGTGCCGTGCTTAGGTGAGTATGTGTATCTGAAAGGGAGAAAAT  
GCCTTCTCTAAGTGCATGCCCCCTCTCAAAGACAATATTCAAATATCATGCCCGATAG  
CTGACAGCGGTCAATGGTTGCT

>700

TAGAGCCTGTGTGCCGTGCTTAGGTGAGTATGTGTATCTGAAAGGGAGAAAATGCCTT  
CCTCTAAGTGCATGCCCCCTCTCAAAGACAATATTCAAATATCATGCCCGATAGCTGAC  
AGCGGTCAATGGTTGCTATGC

>701

TGCCTTCTCTAAGTGCATGCCCCCTCTCAAAGACAATATTCAAATATCATGCCCGATA  
GCTGACAGCGGTCAATGGTTGCTATGCTTCATCCCAAAGCTTTGTTAGGAACCCATAA  
AACCTGGCACATGGTTTGTGA

>702

CTCTAAGTGCATGCCCCCTCTCAAAGACAATATTCAAATATCATGCCCGATAGCTGACA  
GCGGTCAATGGTTGCTATGCTTCATCCCAAAGCTTTGTTAGGAACCCATAAAACCTGG  
CACATGGTTTGTGACACCCAG

>703

GACAATATTCAAATATCATGCCCGATAGCTGACAGCGGTCAATGGTTGCTATGCTTCATC  
CCAAAGCTTTGTTAGGAACCCATAAAACCTGGCACATGGTTTGTGACACCCAGTGAA  
ACACCGTGCTTCTCCATAATA

>704

TGACAGCGGTCAATGGTTGCTATGCTTCATCCCAAAGCTTTGTTAGGAACCCATAAAA  
CCTGGCACATGGTTTGTGACACCCAGTGAAACACCGTGCTTCTCCATAATATCCTGAG  
CCCTGCTGCCTGTCATTAAGGG

>705

AGCGGTCAATGGTTGCTATGCTTCATCCCAAAGCTTTGTTAGGAACCCATAAAACCTG  
GCACATGGTTTGTGACACCCAGTGAAACACCGTGCTTCTCCATAATATCCTGAGCCCT  
GCTGCCTGTCATTAAGGGACCT

>706

CCTGGCACATGGTTTGTGACACCCAGTGAAACACCGTGCTTCTCCATAATATCCTGAG  
CCCTGCTGCCTGTCATTAAGGGACCTCTCTTATTAAGCATCTCTTTTTTAAATGGCTGCC  
ATCATCTGGTCCCAGTGATACA

>707

AGCCCTGCTGCCTGTCATTAAGGGACCTCTCTTATTAAGCATCTCTTTTTTAAATGGCTG  
CCATCATCTGGTCCCAGTGACATTAATCCCATTATAATTATAAACACACTTCCCCATAA  
CATTGTTGCAGATCTCAC

>708

GCTGCCTGTCATTAAGGGACCTCTCTTATTAAGCATCTCTTTTTTAAATGGCTGCCATCA  
TCTGGTCCCAGTGACATTAATCCCATTATAATTATAAACACACTTCCCCATAACATTG  
TTGCAGATCTCACCCCTCAG

>709

GCTGCCATCATCTGGTCCCAGTGACATTAATCCCATTATAATTATAAACACACTTCCC  
CATAACATTGTTGCAGATCTCACCCCTCAGTGCTACCCCTTAGGGCATCTTGCACATA  
ATAACAACCTCAGATTTGCTA

>710

AGTGTACATTAATCCCATTATAATTATAAACACACTTCCCCATAACATTGTTGCAGATC

TCACCCTCAGTGCCTACCCCCTTAGGGCATCTTTGCACTAATAACAACACTCAGATTTGCTA  
TCTGAGTTGACAACATTAG

>711

AGATCTCACCCCTCAGTGCCTACCCCCTTAGGGCATCTTTGCACTAATAACAACACTCAGAT  
TTGCTATCTGAGTTGACAACATTAGGTCCCAACACCATTGCAATATGCTGGGGAAAGA  
GACAGAGAGAGAAGAAAAAGCT

>712

GTGCCTACCCCCTTAGGGCATCTTTGCACTAATAACAACACTCAGATTTGCTATCTGAGTTG  
ACAACATTAGGTCCCAACACCATTGCAATATGCTGGGGAAAGAGACAGAGAGAGAA  
GAAAAAGCTTTTTCTTCCTTAAT

>713

GCAATATGCTGGGGAAAGAGACAGAGAGAGAAGAAAAAGCTTTTTCTTCCTTAATCAC  
GAAGATCTTGGGGTACAGTGACCCAAGGCCTCAGGAGCTAAAAAAAAAAAAATCCCT  
CCTCCTACCCCTTTTAAAAAGTCACT

>714

TGCTGGGGAAAGAGACAGAGAGAGAAGAAAAAGCTTTTTCTTCCTTAATCACGAAGA  
TCTTGGGGTACAGTGACCCAAGGCCTCAGGAGCTAAAAAAAAAAAAATCCCTCCTCCT  
ACCCTTTTAAAAAGTCACTCTCTAC

>715

CTTGGGGTACAGTGACCCAAGGCCTCAGGAGCTAAAAAAAAAAAAATCCCTCCTCCT  
ACCCTTTTAAAAAGTCACTCTCTACTCTACAGATGAGGGAAGGGCATACTTGGCACCT  
GGGAGAGAACTCAAGTTTGTAAC

>716

CTTTTAAAAAGTCACTCTCTACTCTACAGATGAGGGAAGGGCATACTTGGCACCTGGG  
AGAGAACTCAAGTTTGTAACACCACTAACCAGGTCTCTGTTGTTGGGGCGGTGAT  
GGTGGTGGTAGTGGTGGGGTGGGG

>717

TGAAAAGTCACTCTCTACTCTACAGATGAGGGAAGGGCATACTTGGCACCTGGGAGAG  
AACTCAAGTTTGTAACACCACTAACCAGGTCTCTGTTGTTGGGGCGGTGATGGTG  
GTGGTAGTGGTGGGGTGGGGGATG

>718

TCTACAGATGAGGGAAGGGCATACTTGGCACCTGGGAGAGAACTCAAGTTTGTAAC  
ACCACTAACCAGGTCTCTGTTGTTGGGGCGGTGATGGTGGTGGTAGTGGTGGGGTGG  
GGGATGAGGGATGATGGCAATCAC

>719

CACCTGGGAGAGAACTCAAGTTTGTAACACCACTAACCAGGTCTCTGTTGTTGGG  
GCGGTGATGGTGGTGGTAGTGGTGGGGTGGGGGATGAGGGATGATGGCAATCACTAAT  
CAAAGAAGCTGTCTATTGTTT

>720

CTGGGAGAGAACTCAAGTTTGTAACACCACTAACCAGGTCTCTGTTGTTGGGGCG  
GTGATGGTGGTGGTAGTGGTGGGGTGGGGGATGAGGGATGATGGCAATCACTAATCAA  
AGAAGCTGTCTATTGTTTGGCT

>721

GAGAACTCAAGTTTGTAACACCACTAACCAGGTCTCTGTTGTTGGGGCGGTGATG  
GTGGTGGTAGTGGTGGGGTGGGGGATGAGGGATGATGGCAATCACTAATCAAAGAAG  
CTGTCTATTGTTTGGCTGAGCCT

>722

GGGCGGTGATGGTGGTGGTAGTGGTGGGGTGGGGGATGAGGGATGATGGCAATCACTA  
ATCAAAGAAGCTGTCTTATTTGGTTTGTGAGCCTCAACTAACCGGAATGCATACATCA  
CCTGATTCTTTCCCCTCTGCTT

>723

GGTGGTGGTAGTGGTGGGGTGGGGGATGAGGGATGATGGCAATCACTAATCAAAGAA  
GCTGTCTTATTTGGTTTGTGAGCCTCAACTAACCGGAATGCATACATCACCTGATTCTT  
TCCCCTCTGCTTTTTGGAGGGG

>724

TAACCGGAATGCATACATCACCTGATTCTTTCCCCTCTGCTTTTTGGAGGGGGCATCTA  
AGGACATAATGTAAAAGAATTTAAATTTAAAAACAAAAACAAAATGTCAACATATGCA  
GGAGTAAATCCACTCTGCCTA

>725

CTCTGCTTTTTGGAGGGGGCATCTAAGGACATAATGTAAAAGAATTTAAATTTAAAAAC  
AAAAACAAAATGTCAACATATGCAGGAGTAAATCCACTCTGCCTAATTTTTTTTTTTTT  
TTGAAATGAGATCTTGTCTG

>726

GGGCATCTAAGGACATAATGTAAAAGAATTTAAATTTAAAAACAAAAACAAAATGTCA  
ACATATGCAGGAGTAAATCCACTCTGCCTAATTTTTTTTTTTTTTTGAAATGAGATCTT  
GTTCTGTCACCCAGGCTGGAGG

>727

CAAAATGTCAACATATGCAGGAGTAAATCCACTCTGCCTAATTTTTTTTTTTTTTTGAA  
ATGAGATCTTGTCTGTCACCCAGGCTGGAGGGCAGTGGTGCAATCTCAGCTCACTGC  
AGCCACCACCTCCCAGGTTCAA

>728

TGTCAACATATGCAGGAGTAAATCCACTCTGCCTAATTTTTTTTTTTTTTTGAAATGAG  
ATCTTGTCTGTCACCCAGGCTGGAGGGCAGTGGTGCAATCTCAGCTCACTGCAGCCA  
CCACCTCCCAGGTTCAAGCGAT

>729

AATCCACTCTGCCTAATTTTTTTTTTTTTTTGAAATGAGATCTTGTCTGTCACCCAGG  
CTGGAGGGCAGTGGTGCAATCTCAGCTCACTGCAGCCACCACCTCCCAGGTTCAAGC  
GATTCTCCCGCCTCAGCCCCCTA

>730

GATCTTGTCTGTCACCCAGGCTGGAGGGCAGTGGTGCAATCTCAGCTCACTGCAGCC  
ACCACCTCCCAGGTTCAAGCGATTCTCCCGCCTCAGCCCCCTAAGTAGCTGGTATTACA  
GGCACGTGCCACCACGCCTGGCT

>731

TGGTGCAATCTCAGCTCACTGCAGCCACCACCTCCCAGGTTCAAGCGATTCTCCCGCC  
TCAGCCCCCTAAGTAGCTGGTATTACAGGCACGTGCCACCACGCCTGGCTAATTTTTGT  
ATTTTTAGTAGAGATAGGGTTTC

>732

GCAGCCACCACCTCCCAGGTTCAAGCGATTCTCCCGCCTCAGCCCCCTAAGTAGCTGG  
TATTACAGGCACGTGCCACCACGCCTGGCTAATTTTTGTATTTTTAGTAGAGATAGGGTT  
TCACCATGTTGGCCAGGCTGGT

>733

CGATTCTCCCGCCTCAGCCCCCTAAGTAGCTGGTATTACAGGCACGTGCCACCACGCCT

GGCTAATTTTTGTATTTTTAGTAGAGATAGGGTTTCACCATGTTGGCCAGGCTGGTCTCA  
AACTCCTGACCTCAAGTGATC

>734

CCTAAGTAGCTGGTATTACAGGCACGTGCCACCACGCCTGGCTAATTTTTGTATTTTTAG  
TAGAGATAGGGTTTCACCATGTTGGCCAGGCTGGTCTCAAACCTCCTGACCTCAAGTGA  
TCCGCCTGCCTCGGCCTCCTAA

>735

TGGTATTACAGGCACGTGCCACCACGCCTGGCTAATTTTTGTATTTTTAGTAGAGATAGG  
GTTTCACCATGTTGGCCAGGCTGGTCTCAAACCTCCTGACCTCAAGTGATCCGCCTGCCT  
CGGCCTCCTAAAGTGCTGGGA

>736

ACGTGCCACCACGCCTGGCTAATTTTTGTATTTTTAGTAGAGATAGGGTTTCACCATGTT  
GGCCAGGCTGGTCTCAAACCTCCTGACCTCAAGTGATCCGCCTGCCTCGGCCTCCTAAA  
GTGCTGGGAGTACAGGCATGAG

>737

ATTTTTGTATTTTTAGTAGAGATAGGGTTTCACCATGTTGGCCAGGCTGGTCTCAAACCTC  
CTGACCTCAAGTGATCCGCCTGCCTCGGCCTCCTAAAGTGCTGGGAGTACAGGCATGA  
GCCACTGCGCCAGCCTACTCT

>738

TTTCACCATGTTGGCCAGGCTGGTCTCAAACCTCCTGACCTCAAGTGATCCGCCTGCCTC  
GGCCTCCTAAAGTGCTGGGAGTACAGGCATGAGCCACTGCGCCAGCCTACTCTGCC  
AATTGTTGACATCACCTACAGCT

>739

GTTGGCCAGGCTGGTCTCAAACCTCCTGACCTCAAGTGATCCGCCTGCCTCGGCCTCCT  
AAAGTGCTGGGAGTACAGGCATGAGCCACTGCGCCAGCCTACTCTGCCAATTGTTG  
ACATCACCTACAGCTCTATAGTAG

>740

CCTGCCTCGGCCTCCTAAAGTGCTGGGAGTACAGGCATGAGCCACTGCGCCAGCCTA  
CTCTGCCAATTGTTGACATCACCTACAGCTCTATAGTAGATGTCTGGAATGATGATCTG  
AAGGACTGTAAGACTGTAAGAT

>741

GGGAGTACAGGCATGAGCCACTGCGCCAGCCTACTCTGCCAATTGTTGACATCACC  
TACAGCTCTATAGTAGATGTCTGGAATGATGATCTGAAGGACTGTAAGACTGTAAGATT  
TTTTGACTCCAGAAATGGACACA

>742

ACAGGCATGAGCCACTGCGCCAGCCTACTCTGCCAATTGTTGACATCACCTACAGC  
TCTATAGTAGATGTCTGGAATGATGATCTGAAGGACTGTAAGACTGTAAGATTTTTGA  
CTCCAGAAATGGACACAATAGGC

>743

CTACTCTGCCAATTGTTGACATCACCTACAGCTCTATAGTAGATGTCTGGAATGATGAT  
CTGAAGGACTGTAAGACTGTAAGATTTTTGACTCCAGAAATGGACACAATAGGCTTG  
CGGTGTCTTCCCCTAACAGTCC

>744

CCCAATTGTTGACATCACCTACAGCTCTATAGTAGATGTCTGGAATGATGATCTGAAGG  
ACTGTAAGACTGTAAGATTTTTGACTCCAGAAATGGACACAATAGGCTTGCGGTGTCT  
TCCCCTAACAGTCCCTGGCAGG

>745

GAATGATGATCTGAAGGACTGTAAGACTGTAAGATTTTTTACTCCAGAAATGGACAC  
AATAGGCTTGCGGTGTCTTCCCCTAACAGTCCCTGGCAGGGTAAAGGTCTGATGCCCT  
GGTACGTTCCCCAGTGGCAATCTG

>746

ATGATGATCTGAAGGACTGTAAGACTGTAAGATTTTTTACTCCAGAAATGGACACAAT  
AGGCTTGCGGTGTCTTCCCCTAACAGTCCCTGGCAGGGTAAAGGTCTGATGCCCTGGT  
ACGTTCCCCAGTGGCAATCTGGA

>747

GTAAGATTTTTTACTCCAGAAATGGACACAATAGGCTTGCGGTGTCTTCCCCTAACAG  
TCCCTGGCAGGGTAAAGGTCTGATGCCCTGGTACGTTCCCCAGTGGCAATCTGGAGTT  
CTCAACTGCAGAGAATACTTTTC

>748

TTTTTTACTCCAGAAATGGACACAATAGGCTTGCGGTGTCTTCCCCTAACAGTCCCTG  
GCAGGGTAAAGGTCTGATGCCCTGGTACGTTCCCCAGTGGCAATCTGGAGTTCTCAAC  
TGCAGAGAATACTTTTCCTCTAC

>749

GAAATGGACACAATAGGCTTGCGGTGTCTTCCCCTAACAGTCCCTGGCAGGGTAAAGG  
TCTGATGCCCTGGTACGTTCCCCAGTGGCAATCTGGAGTTCTCAACTGCAGAGAATACT  
TTTCTCTACTCAGGGGCGTCAC

>750

CCCTGGTACGTTCCCCAGTGGCAATCTGGAGTTCTCAACTGCAGAGAATACTTTTCCTC  
TACTCAGGGGCGTCACTACCTGCATCTCTCCCTGAACATGCTTCATTTTCCACTCATCAC  
AAGTTTTTGGGGAAATGCAAA

>751

TTTTCTCTACTCAGGGGCGTCACTACCTGCATCTCTCCCTGAACATGCTTCATTTTCCA  
CTCATCACAAGTTTTTGGGGAAATGCAAAGTGGCATCTTCTCCCCAAAAGGTAGGGAT  
CTTTGATTTTTTTAATCACGAT

>752

GTCCTACCTGCATCTCTCCCTGAACATGCTTCATTTTCCACTCATCACAAGTTTTTGGG  
GAAATGCAAAGTGGCATCTTCTCCCCAAAAGGTAGGGATCTTTGATTTTTTTAATCACG  
ATAGAAAAGTTTACTTTGAAA

>753

TGAACATGCTTCATTTTCCACTCATCACAAGTTTTTGGGGAAATGCAAAGTGGCATCTT  
CTCCCCAAAAGGTAGGGATCTTTGATTTTTTTAATCACGATAGAAAAGTTTACTTTGAA  
ATAAAAAAATTAATATATGTT

>754

GGGGAAATGCAAAGTGGCATCTTCTCCCCAAAAGGTAGGGATCTTTGATTTTTTTAATC  
ACGATAGAAAAGTTTACTTTGAAATAAAAAAATTAATATATGTTCCAAATTAAGAGTT  
GGAACCTAAAGAGTTGCAACAT

>755

AAGGTAGGGATCTTTGATTTTTTTAATCACGATAGAAAAGTTTACTTTGAAATAAAAAA  
ATTAATATATGTTCCAAATTAAGAGTTGGAACCTAAAGAGTTGCAACATTCCATTCATA  
CTCAGATACTCAAACACCAC

>756

TGATTTTTTTAATCACGATAGAAAAGTTTACTTTGAAATAAAAAAATTAATATATGTTT

CAAATTAAGAGTTGGAACCTAAAGAGTTGCAACATTCCATTCATACTCAGATACTCAAA  
ACACCACTGTATTCTTCTTCC

>757

CGATAGAAAAGTTTACTTTGAAATAAAAAAATTAATATATGTTCCAAATTAAGAGTTG  
GAACTTAAAGAGTTGCAACATTCCATTCATACTCAGATACTCAAAACACCACTGTATTC  
TTCTTCTATCTCTTTAGTTGA

>758

TTCCAAATTAAGAGTTGGAACCTAAAGAGTTGCAACATTCCATTCATACTCAGATACTC  
AAAACACCACTGTATTCTTCTTCTATCTCTTTAGTTGAAGTTTTTTTTTGTAAATCAAA  
GCCCCCTCCCAATTTCTGCC

>759

AAAGAGTTGCAACATTCCATTCATACTCAGATACTCAAAACACCACTGTATTCTTCTTC  
CTATCTCTTTAGTTGAAGTTTTTTTTTGTAAATCAAAGCCCCCTCCCAATTTCTGCCTG  
AGATTCTGAGGGAGGAGGAAA

>760

CCATTCATACTCAGATACTCAAAACACCACTGTATTCTTCTTCTATCTCTTTAGTTGAA  
GTTTTTTTTTGTAAATCAAAGCCCCCTCCCAATTTCTGCCTGAGATTCTGAGGGAGGA  
GGAAAAGTGAAGATCCTGGG

>761

TTGAAGTTTTTTTTTGTAAATCAAAGCCCCCTCCCAATTTCTGCCTGAGATTCTGAGG  
GAGGAGGAAAAGTGAAGATCCTGGGGGATCTAAGTCTCTTTACCTGGTGACCAAGCT  
GAGAACCATTTGGTCCTCAGCTT

>762

AAGCCCCCTCCCAATTTCTGCCTGAGATTCTGAGGGAGGAGGAAAAGTGAAGATCC  
TGGGGGATCTAAGTCTCTTTACCTGGTGACCAAGCTGAGAACCATTTGGTCCTCAGCTT  
GGCTGGCTGCTGCACAGATCTTG

>763

AATTTCTGCCTGAGATTCTGAGGGAGGAGGAAAAGTGAAGATCCTGGGGGATCTAAG  
TCTCTTTACCTGGTGACCAAGCTGAGAACCATTTGGTCCTCAGCTTGGCTGGCTGCTGC  
ACAGATCTTGGCCTCAGCAGAGT

>764

GAGGAGGAAAAGTGAAGATCCTGGGGGATCTAAGTCTCTTTACCTGGTGACCAAGCT  
GAGAACCATTTGGTCCTCAGCTTGGCTGGCTGCTGCACAGATCTTGGCCTCAGCAGAG  
TAAGAGAAGAAGGAAAATTAAG

>765

TGGTGACCAAGCTGAGAACCATTTGGTCCTCAGCTTGGCTGGCTGCTGCACAGATCTT  
GGCCTCAGCAGAGTAAGAGAAGAAGGAAAATTAAGGCCCTTGCTTCTTCATCTATT  
TCACTAGAGGCTACATAATCTAGA

>766

TAAGAGAAGAAGGAAAATTAAGGCCCTTGCTTCTTCATCTATTTCACTAGAGGCTAC  
ATAATCTAGAAGTTAAGAGCATGAGCTTTGCAAGTGAATGGTCTGATTTAAAGTTTCA  
GCTCTGATGTTAATAGATCTA

>767

AAGCCCTTGCTTCTTCATCTATTTCACTAGAGGCTACATAATCTAGAAGTTAAGAGCAT  
GAGCTTTCAGTCAGAATGGTCTGATTTAAAGTTTCAGCTCTGATGTTAATAGATCTAC  
AGTCTGCAGTAAGGCACTTA

>768

CTTCCTTCATCTATTTCACTAGAGGCTACATAATCTAGAAGTTAAGAGCATGAGCTTTGC  
AGTCAGAATGGTCTGATTTAAAGTTTCAGCTCTGATGTTAATAGATCTACAGTCTGCA  
GTAAGGCACTTAATCTCTCTG

>769

TACATAATCTAGAAGTTAAGAGCATGAGCTTTGCAGTCAGAATGGTCTGATTTAAAGTT  
TCAGCTCTGATGTTAATAGATCTACAGTCTGCAGTAAGGCACTTAATCTCTCTGAACCT  
CAGTTTTTCATGTCCACAGAAA

>770

TAAGAGCATGAGCTTTGCAGTCAGAATGGTCTGATTTAAAGTTTCAGCTCTGATGTTTA  
ATAGATCTACAGTCTGCAGTAAGGCACTTAATCTCTCTGAACCTCAGTTTTTCATGTCCA  
CAGAAATTGGGAAAATAATAGC

>771

ATGAGCTTTGCAGTCAGAATGGTCTGATTTAAAGTTTCAGCTCTGATGTTAATAGATCT  
ACAGTCTGCAGTAAGGCACTTAATCTCTCTGAACCTCAGTTTTTCATGTCCACAGAAATT  
GGGAAAATAATAGCACCTGCA

>772

TTAAAGTTTCAGCTCTGATGTTAATAGATCTACAGTCTGCAGTAAGGCACTTAATCTCT  
CTGAACCTCAGTTTTTCATGTCCACAGAAATTGGGAAAATAATAGCACCTGCATTAATAG  
GATTGTTATGTGGATTAATA

>773

AATCTCTCTGAACCTCAGTTTTTCATGTCCACAGAAATTGGGAAAATAATAGCACCTGCA  
TTAATAGGATTGTTATGTGGATTAATAAAACAACATAGGTAATGTGTTGAGTTTCGTAG  
TCAGTGCTCAGAATGAGTTAT

>774

CTCTGAACCTCAGTTTTTCATGTCCACAGAAATTGGGAAAATAATAGCACCTGCATTAAT  
AGGATTGTTATGTGGATTAATAAAACAACATAGGTAATGTGTTGAGTTTCGTAGTCAG  
TGCTCAGAATGAGTTATTATTT

>775

CACAGAAATTGGGAAAATAATAGCACCTGCATTAATAGGATTGTTATGTGGATTAATAA  
AACAACATAGGTAATGTGTTGAGTTTCGTAGTCAGTGCTCAGAATGAGTTATTATTTTCG  
CTGTCTCCTTCCTGTATGAT

>776

AAATTGGGAAAATAATAGCACCTGCATTAATAGGATTGTTATGTGGATTAATAAAACA  
ACATAGGTAATGTGTTGAGTTTCGTAGTCAGTGCTCAGAATGAGTTATTATTTTCGCTGT  
CTCCTTCCTGTATGATCTCTT

>777

ATTGGGAAAATAATAGCACCTGCATTAATAGGATTGTTATGTGGATTAATAAAACAACA  
TAGGTAATGTGTTGAGTTTCGTAGTCAGTGCTCAGAATGAGTTATTATTTTCGCTGTCTC  
CTCCTGTATGATCTCTTAG

>778

TAATAGCACCTGCATTAATAGGATTGTTATGTGGATTAATAAAACAACATAGGTAATGT  
GTTGAGTTTCGTAGTCAGTGCTCAGAATGAGTTATTATTTTCGCTGTCTCCTTCCTGTAT  
GATCTCTTAGAACTGCTATA

>779

GGATTGTTATGTGGATTAATAAAACAACATAGGTAATGTGTTGAGTTTCGTAGTCAGT



GCTCAGAATGAGTTATTATTTTCGCTGTCTCCTTCTGTATGATCTCTTAGAACTGCTATA  
CCCTCCTGTTCCACTAACTG

>780

AACATAGGTAATGTGTTGAGTTTCGTAGTCAGTGCTCAGAATGAGTTATTATTTTCGCTG  
TCTCCTTCTGTATGATCTCTTAGAACTGCTATACCCTCCTGTTCCACTAACTGAGCTCT  
GAAAGGCTGCCAGTGGTGGG

>781

GTGCTCAGAATGAGTTATTATTTTCGCTGTCTCCTTCTGTATGATCTCTTAGAACTGCTA  
TACCCTCCTGTTCCACTAACTGAGCTCTGAAAGGCTGCCAGTGGTGGGAGGTACATGG  
GTAAAGAGGGAGATGAGGGAG

>782

TCCTTCTGTATGATCTCTTAGAACTGCTATACCCTCCTGTTCCACTAACTGAGCTCTGA  
AAGGCTGCCAGTGGTGGGAGGTACATGGGTAAAGAGGGAGATGAGGGAGTAAGATTT  
AGCAATGGAATTCCATGCAAAGG

>783

TTCCTGTATGATCTCTTAGAACTGCTATACCCTCCTGTTCCACTAACTGAGCTCTGAAAG  
GCTGCCAGTGGTGGGAGGTACATGGGTAAAGAGGGAGATGAGGGAGTAAGATTTAGC  
AATGGAATTCCATGCAAAGGCCA

>784

ATGATCTCTTAGAACTGCTATACCCTCCTGTTCCACTAACTGAGCTCTGAAAGGCTGCC  
AGTGGTGGGAGGTACATGGGTAAAGAGGGAGATGAGGGAGTAAGATTTAGCAATGGA  
ATTCCATGCAAAGGCCAGCTCATC

>785

TGTTCCACTAACTGAGCTCTGAAAGGCTGCCAGTGGTGGGAGGTACATGGGTAAAGAG  
GGAGATGAGGGAGTAAGATTTAGCAATGGAATTCCATGCAAAGGCCAGCTCATCTATTC  
CTCTGTCTCTAGCATGATCTCCC

>786

TAAAGAGGGAGATGAGGGAGTAAGATTTAGCAATGGAATTCCATGCAAAGGCCAGCTC  
ATCTATTCCTCTGTCTCTAGCATGATCTCCCCCTAAGATTGAGATCTCCTGTATTTTAGA  
ACTGATACCCAGGTTTCCCTT

>787

TTCATGCAAAGGCCAGCTCATCTATTCTCTGTCTCTAGCATGATCTCCCCCTAAGATT  
GAGATCTCCTGTATTTTAGA ACTGATACCCAGGTTTCCCTTAAAAGACGCTTCAAGAA  
AAAATGTAAAAGAAAAATCAC

>788

TATTCCTCTGTCTCTAGCATGATCTCCCCCTAAGATTGAGATCTCCTGTATTTTAGA ACT  
GATACCCAGGTTTCCCTTAAAAGACGCTTCAAGAAAAAATGTAAAAGAAAAATCACTC  
TAAATACACGAACATGAGAGA

>789

AAGATTGAGATCTCCTGTATTTTAGA ACTGATACCCAGGTTTCCCTTAAAAGACGCTT  
CAAGAAAAAATGTAAAAGAAAAATCACTCTAAATACACGAACATGAGAGAGACAGAA  
AGAGAGCGGGCATGTGCGCGCGAG

>790

CAAGAAAAAATGTAAAAGAAAAATCACTCTAAATACACGAACATGAGAGAGACAGAA  
AGAGAGCGGGCATGTGCGCGCGAGAGAGATTGAGTATTCTTGTAAATTTCCATCCTG  
CTTGTTTTTAGGTGCTGCCATATG

>791

AAATCACTCTAAATACACGAACATGAGAGAGACAGAAAGAGAGCGGGCATGTGCGCG  
CGAGAGAGATTGAGTATTCTCTTGTAAATTTCCATCCTGCTTGTGTTTTAGGTGCTGCCAT  
ATGAAATCTCTGAACTGAGGAGT

>792

AAATACACGAACATGAGAGAGACAGAAAGAGAGCGGGCATGTGCGCGCGAGAGAGA  
TTGAGTATTCTCTTGTAAATTTCCATCCTGCTTGTGTTTTAGGTGCTGCCATATGAAATCTC  
TGAAGTGAAGGAGTCTCATCAGCC

>793

AGAGAGCGGGCATGTGCGCGCGAGAGAGATTGAGTATTCTCTTGTAAATTTCCATCCTG  
CTTGTGTTTTAGGTGCTGCCATATGAAATCTCTGAACTGAGGAGTCTCATCAGCCTTCCC  
AGGACCCAAGGACATAGCTCTG

>794

GAGTATTCTCTTGTAAATTTCCATCCTGCTTGTGTTTTAGGTGCTGCCATATGAAATCTCTG  
AACTGAGGAGTCTCATCAGCCTTCCCAGGACCCAAGGACATAGCTCTGGCTATAAATG  
GTGCCAGTTTTGGTGGGGGAG

>795

ATGAAATCTCTGAACTGAGGAGTCTCATCAGCCTTCCCAGGACCCAAGGACATAGCTC  
TGGCTATAAATGGTGCCAGTTTTGGTGGGGGAGCTGCTGCTGCTTTATCTGGGCCCAAT  
AAACCTTATCAAAGTCTGTGCA

>796

TCTCTGAACTGAGGAGTCTCATCAGCCTTCCCAGGACCCAAGGACATAGCTCTGGCTAT  
AAATGGTGCCAGTTTTGGTGGGGGAGCTGCTGCTGCTTTATCTGGGCCAATAAACCTT  
ATCAAAGTCTGTGCAGCCAGC

>797

AAATGGTGCCAGTTTTGGTGGGGGAGCTGCTGCTGCTTTATCTGGGCCAATAAACCTT  
ATCAAAGTCTGTGCAGCCAGCCTTCCAGCGCTAAGTGGAAATGCTTGGAGCCCAATGC  
TGGCATTAGCCACAGCCTCGC

>798

GAGCTGCTGCTGCTTTATCTGGGCCAATAAACCTTATCAAAGTCTGTGCAGCCAGCC  
TTCAGCGCTAAGTGGAAATGCTTGGAGCCCAATGCTGGCATTAGCCACAGCCTCGC  
CTGCCTTCTTCTTTTTGTTACC

>799

CGCTAAGTGGAAATGCTTGGAGCCCAATGCTGGCATTAGCCACAGCCTCGCCTGCC  
TTCTTCTTTTTGTTACCTTCTCCACCTCTTAAATTCAGGCATTAATCTCTTTAACACT  
TACTAACAAGGGCTGGGCTTT

>800

CACCTCTTAAATTCAGGCATTAATCTCTTTAACACTTACTAACAAGGGCTGGGCTTTT  
AATGGGCAGCGTTTATGAAGCAAGGGAGATTTTCACATAGAGTGAATATGGCACGGGG  
GTGGGGAGGCCAGGGCCATAGA

>801

TAACACTTACTAACAAGGGCTGGGCTTTTAAATGGGCAGCGTTTATGAAGCAAGGGAGA  
TTTTACATAGAGTGAATATGGCACGGGGGTGGGGAGGCCAGGGCCATAGAGGATTGT  
GCTTTCTCTCCATTGTTCCAGA

>802

GGCTGGGCTTTTAAATGGGCAGCGTTTATGAAGCAAGGGAGATTTTCACATAGAGTGAAT

ATGGCACGGGGGTGGGGAGGCCAGGGCCATAGAGGATTGTGCTTTCTCTCCATTGTT  
TCCAGAGATTCTCTTTCTCTG

>803

TGAAGCAAGGGAGATTTTCACATAGAGTGAATATGGCACGGGGGTGGGGAGGCCAGG  
GCCATAGAGGATTGTGCTTTCTCTCCATTGTTCCAGAGATTCTCTTTCTCTGATT  
GAGGATTAATAGGAGATTAGGAT

>804

TCACATAGAGTGAATATGGCACGGGGGTGGGGAGGCCAGGGCCATAGAGGATTGTGCT  
TTCTCTCCATTGTTTCCAGAGATTCTCTTTCTCTGATTTGAGGATTAATAGGAGATT  
AGGATCAGGGGTTAATTGTGTG

>805

TTCTCTCCATTGTTTCCAGAGATTCTCTTTCTCTGATTTGAGGATTAATAGGAGATT  
AGGATCAGGGGTTAATTGTGTGCTTCTCCTGCTACTGCACTGAGGAGAGGCTGGTAGG  
TGGATGTGGACAGCAAAGCGGA

>806

CCATTGTTTCCAGAGATTCTCTTTCTCTGATTTGAGGATTAATAGGAGATTAGGATCA  
GGGGTTAATTGTGTGCTTCTCCTGCTACTGCACTGAGGAGAGGCTGGTAGGTGGATGT  
GGACAGCAAAGCGGAAACCTAC

>807

AGGATTAATAGGAGATTAGGATCAGGGGTTAATTGTGTGCTTCTCCTGCTACTGCACTG  
AGGAGAGGCTGGTAGGTGGATGTGGACAGCAAAGCGGAAACCTACAGCAGGCACTAT  
CTAGGCAGAAGCTCAACAAGTGTA

>808

TTAATAGGAGATTAGGATCAGGGGTTAATTGTGTGCTTCTCCTGCTACTGCACTGAGGA  
GAGGCTGGTAGGTGGATGTGGACAGCAAAGCGGAAACCTACAGCAGGCACTATCTAG  
GCAGAAGCTCAACAAGTG TAGTGA

>809

GGCTGGTAGGTGGATGTGGACAGCAAAGCGGAAACCTACAGCAGGCACTATCTAGGC  
AGAAGCTCAACAAGTG TAGTGATTCTTTCTCTGTTCCCTGGTGAGGCACCAGGAGG  
GTCTTTTCTCCTCTCCTTACATCCC

>810

CTGGTAGGTGGATGTGGACAGCAAAGCGGAAACCTACAGCAGGCACTATCTAGGCAG  
AAGCTCAACAAGTG TAGTGATTCTTTCTCTGTTCCCTGGTGAGGCACCAGGAGGGT  
CTTTTCTCCTCTCCTTACATCCCTC

>811

GGAAACCTACAGCAGGCACTATCTAGGCAGAAGCTCAACAAGTG TAGTGATTCTTTCT  
TCTGTTTCCCTGGTGAGGCACCAGGAGGGTCTTTTCTCCTCTCCTTACATCCCTCCACT  
CTTGCTCTCCTTG CAGCCCAGTT

>812

CACTATCTAGGCAGAAGCTCAACAAGTG TAGTGATTCTTTCTCTGTTTCCCTGGTGAG  
GCACCAGGAGGGTCTTTTCTCCTCTCCTTACATCCCTCCACTCTTGCTCTCCTTG CAGC  
CCAGTTCTTTCTAACTTTCTT

>813

CTGGTGAGGCACCAGGAGGGTCTTTTCTCCTCTCCTTACATCCCTCCACTCTTGCTCTC  
CTTG CAGCCCAGTTCTTTCTAACTTTCTTTAAATCCCTTCTCTAACAGGGTGATAG  
ACCTTAGTTAGAAAAACAGGT

>814

CCCTCCACTCTTGCTCCTTGAGCCAGTTCTTCTAACTTTCTTTAAATCCCTTTC  
CTCTAACAGGGTGTATAGACCTTAGTTAGAAAAACAGGTAGTCTCTAAATGGGATTGCT  
CTTTATTGTTAATGAAATGAA

>815

TCTCCTTGAGCCAGTTCTTCTAACTTTCTTTAAATCCCTTTCCTCTAACAGGGTGT  
ATAGACCTTAGTTAGAAAAACAGGTAGTCTCTAAATGGGATTGCTCTTTATTGTTAATGA  
AATGAATACCCAGGGACTGG

>816

CAGTTCTTCTAACTTTCTTTAAATCCCTTTCCTCTAACAGGGTGTATAGACCTTAGTT  
AGAAAAACAGGTAGTCTCTAAATGGGATTGCTCTTTATTGTTAATGAAATGAATACCCA  
GGGACTGGGCTTCCCCTCCGC

>817

TTTCTCTAACAGGGTGTATAGACCTTAGTTAGAAAAACAGGTAGTCTCTAAATGGGAT  
TGCTCTTTATTGTTAATGAAATGAATACCCAGGGACTGGGCTTCCCCTCCGCTTGCCCT  
GGGTTTGATGTGGTTGTATCCC

>818

AAATGGGATTGCTCTTTATTGTTAATGAAATGAATACCCAGGGACTGGGCTTCCCCTCC  
GCTTGCCCTGGGTTTGATGTGGTTGTATCCCGTGCTATCAGAGGAGCCCTTCTTCACT  
CAAGTGTGTTCCCCTGCCAGC

>819

ATTGCTCTTTATTGTTAATGAAATGAATACCCAGGGACTGGGCTTCCCCTCCGCTTGCCC  
TGGGTTTGATGTGGTTGTATCCCGTGCTATCAGAGGAGCCCTTCTTCACTCAAGTGTG  
TCCCCTGCCAGCTCTCTCC

>820

TCCCCTCCGCTTGCCCTGGGTTTGATGTGGTTGTATCCCGTGCTATCAGAGGAGCCCTT  
CCTTCACTCAAGTGTGTTCCCCTGCCAGCTCTCTCCGCAGACTCCTGCTGGGCTGAG  
CTTCCCCTGCTCTTAAGAGTCAG

>821

CCCTCCGCTTGCCCTGGGTTTGATGTGGTTGTATCCCGTGCTATCAGAGGAGCCCTTCC  
TCACTCAAGTGTGTTCCCCTGCCAGCTCTCTCCGCAGACTCCTGCTGGGCTGAGCTT  
TCCCTGCTCTTAAGAGTCAGGA

>822

CTCAAGTGTGTTCCCCTGCCAGCTCTCTCCGCAGACTCCTGCTGGGCTGAGCTTTCCC  
TGCTCTTAAGAGTCAGGAGTGGCTCTTGCTGGGATGGAATGACCCGCTTTGGGGCTG  
CCTCATGAGCGGCTTGTGAAC

>823

GTGTTCCCCTGCCAGCTCTCTCCGCAGACTCCTGCTGGGCTGAGCTTTCCCTGCTCTT  
AAGAGTCAGGAGTGGCTCTTGCTGGGATGGAATGACCCGCTTTGGGGCTGCCTCATG  
AGCGGCTTGTGAACCCGGATC

>824

GACTCCTGCTGGGCTGAGCTTTCCCTGCTCTTAAGAGTCAGGAGTGGCTCTTGCTGGG  
ATGGAATGACCCGCTTTGGGGCTGCCTCATGAGCGGCTTGTGAACCCGGATCAGT  
TCCGATGTGTAACCTCTACCGCCT

>825

TTAAGAGTCAGGAGTGGCTCTTGCTGGGATGGAATGACCCGCTTTGGGGCTGCCTCA

TGAGCGGCTCTTGTAACCCGGATCAGTTCCGATGTGTAACTCTACCGCCTGGCCTTC  
AGCGAACAGATACAGATTTCTGC

>826

TGGCTCTTGCTGGGATGGAATGACCCGTCTTTGGGGCTGCCTCATGAGCGGCTCTTG  
AACCCGGATCAGTTCCGATGTGTAACTCTACCGCCTGGCCTTCAGCGAACAGATACA  
GATTTCTGCCACCTTCCATGACC

>827

TGGGATGGAATGACCCGTCTTTGGGGCTGCCTCATGAGCGGCTCTTGTAACCCGGAT  
CAGTTCCGATGTGTAACTCTACCGCCTGGCCTTCAGCGAACAGATACAGATTTCTGCC  
ACCTTCCATGACCCTACAGTTCA

>828

GATGTGTAACTCTACCGCCTGGCCTTCAGCGAACAGATACAGATTTCTGCCACCTTCC  
ATGACCCTACAGTTCATGGGACTGGGTCTGGGGCAGTGCCAGAGGCACGCATGGAGGT  
GTGATTCTAGGTGAGTCCTGCGG

>829

ACCGCCTGGCCTTCAGCGAACAGATACAGATTTCTGCCACCTTCCATGACCCTACAGTT  
CATGGGACTGGGTCTGGGGCAGTGCCAGAGGCACGCATGGAGGTGTGATTCTAGGTG  
AGTCCTGCGGAAAACCTCTGGCCC

>830

CTTCAGCGAACAGATACAGATTTCTGCCACCTTCCATGACCCTACAGTTCATGGGACTG  
GGTCTGGGGCAGTGCCAGAGGCACGCATGGAGGTGTGATTCTAGGTGAGTCCTGCGG  
AAAACCTCTGGCCCACCCGTGAGT

>831

CCATGACCCTACAGTTCATGGGACTGGGTCTGGGGCAGTGCCAGAGGCACGCATGGAG  
GTGTGATTCTAGGTGAGTCCTGCGGAAAACCTCTGGCCCACCCGTGAGTCACGGACAG  
AACATGCAGACTCGGGCCTTGGTG

>832

GACCCTACAGTTCATGGGACTGGGTCTGGGGCAGTGCCAGAGGCACGCATGGAGGTG  
TGATTCTAGGTGAGTCCTGCGGAAAACCTCTGGCCCACCCGTGAGTCACGGACAGAAC  
ATGCAGACTCGGGCCTTGGTGACAT

>833

GGGGCAGTGCCAGAGGCACGCATGGAGGTGTGATTCTAGGTGAGTCCTGCGGAAAAC  
CTCTGGCCCACCCGTGAGTCACGGACAGAACATGCAGACTCGGGCCTTGGTGACATAA  
GCTCCGATTGCTAAAACCGCGTGA

>834

TAGGTGAGTCCTGCGGAAAACCTCTGGCCCACCCGTGAGTCACGGACAGAACATGCA  
GACTCGGGCCTTGGTGACATAAGCTCCGATTGCTAAAACCGCGTGACCTCGAGGGCT  
GACTGGCCTGAGAACCCTGGATGGC

>835

ACCCGTGAGTCACGGACAGAACATGCAGACTCGGGCCTTGGTGACATAAGCTCCGCAT  
TGCTAAAACCGCGTGACCTCGAGGGCTGACTGGCCTGAGAACCCTGGATGGCGCTCTC  
GGCCACCCCACTCCACCCCAA

>836

TGACTGGCCTGAGAACCCTGGATGGCGCTCTCGGCCACCCCACTCCACCCCAACC  
TCCTGGGCTTCGGTCAGAATCCACAGCCCGTGCCGAAGAGCGCTCCCGCTCTGGC  
ACCCTACCTTCGCTCAGCTCCAGG

>837

CTGGATGGCGCTCTCGGCCACCCACCTCCACCCCAACCTCCTGGGCTTCGGTCAG  
AATCCACAGCCCGTGCCGAAGAGCGCTTCCCGCCTCTGGCACCTACCTTCGCTCAG  
CTCCAGGGAAAAGGGGAGAGGGCA

>838

AGCGCTTCCCGCCTCTGGCACCTACCTTCGCTCAGCTCCAGGGAAAAGGGGAGAGG  
GCAGCTTCTGCAGTCAGAGGAAGAGTACATTTTCTTTGGCTGCTCTACCCTCTGAAGT  
AGGGCGGCCAGCTGAAGGAGGACA

>839

CTCTGGCACCTACCTTCGCTCAGCTCCAGGGAAAAGGGGAGAGGGCAGCTTTCTGC  
AGTCAGAGGAAGAGTACATTTTCTTTGGCTGCTCTACCCTCTGAAGTAGGGCGGCCAG  
CTGAAGGAGGACACACTTTTGAGGG

>840

AAAAGGGGAGAGGGCAGCTTTCTGCAGTCAGAGGAAGAGTACATTTTCTTTGGCTGCT  
CTACCCTCTGAAGTAGGGCGGCCAGCTGAAGGAGGACACACTTTTGAGGGGCCAGA  
GGTTGTCCAAGCTTCCCCTGCCCC

>841

TCTTTGGCTGCTCTACCCTCTGAAGTAGGGCGGCCAGCTGAAGGAGGACACACTTTTG  
AGGGGCCAGAGGTTGTCCAAGCTTCCCCTGCCCCCTGAAGACTGTGCACTGAGCT  
GGGCGCAGTTCTCGGGAAGTGTTC

>842

TTGGTGCTCTACCCTCTGAAGTAGGGCGGCCAGCTGAAGGAGGACACACTTTTGAGG  
GGCCAGAGGTTGTCCAAGCTTCCCCTGCCCCCTGAAGACTGTGCACTGAGCTGGGC  
GCAGTTCTCGGGAAGTGTTCAC

>843

CCAGCTGAAGGAGGACACACTTTTGAGGGGCCAGAGGTTGTCCAAGCTTCCCCTG  
CCCCCTGAAGACTGTGCACTGAGCTGGGCGCAGTTCTCGGGAAGTGTTCACCCAGA  
TTGCTGGGGGGCGGGGGGGGGTGGG

>844

CTTTTGAGGGGCCAGAGGTTGTCCAAGCTTCCCCTGCCCCCTGAAGACTGTGCACT  
GAGCTGGGCGCAGTTCTCGGGAAGTGTTCACCCAGATTGCTGGGGGGCGGGGGGG  
GGTGGGATGAGGGCAGAGCCGAGAG

>845

CAGAGGTTGTCCAAGCTTCCCCTGCCCCCTGAAGACTGTGCACTGAGCTGGGCGCA  
GTTCTCGGGAAGTGTTCACCCAGATTGCTGGGGGGCGGGGGGGGGTGGGATGAGG  
GCAGAGCCGAGAGGCTGTCCAAGGTT

>846

AGACTGTGCACTGAGCTGGGCGCAGTTCTCGGGAAGTGTTCACCCAGATTGCTGGG  
GGGCGGGGGGGGGTGGGATGAGGGCAGAGCCGAGAGGCTGTCCAAGTGTGGGAGA  
GAGAAAAGTTTCTCCAGGACTCGAC

>847

CTCGGGAAGTGTTCACCCAGATTGCTGGGGGGCGGGGGGGGGTGGGATGAGGGCA  
GAGCCGAGAGGCTGTCCAAGTGTGGGAGAGAGAAAAGTTTCTCCAGGACTCGACC  
TTGGCCTCCAGCAATCGCGACAGCTA

>848

ACTGTTTCCACCCAGATTGCTGGGGGGCGGGGGGGGGTGGGATGAGGGCAGAGCCGA

GAGGCTGTCCAAGGTTTGGGAGAGAGAAAAGTTTCTCCAGGACTCGACCTTGGCCT  
CCAGCAATCGCGACAGCTAAAAACGG

>849

TGCTGGGGGGCGGGGGGGGGTGGGATGAGGGCAGAGCCGAGAGGCTGTCCAAGGTT  
TGGGAGAGAGAAAAGTTTCTCCAGGACTCGACCTTGGCCTCCAGCAATCGCGACAG  
CTAAAAACGGGTGTCTCGCTTCGACAA

>850

GTTTGGGAGAGAGAAAAGTTTCTCCAGGACTCGACCTTGGCCTCCAGCAATCGCGA  
CAGCTAAAAACGGGTGTCTCGCTTCGACAATAGATCCCCGCGGACCTTCTGGCACCTG  
GTTCACTAGCGCCCGGAACTCTGC

>851

TTGGGAGAGAGAAAAGTTTCTCCAGGACTCGACCTTGGCCTCCAGCAATCGCGACA  
GCTAAAAACGGGTGTCTCGCTTCGACAATAGATCCCCGCGGACCTTCTGGCACCTGGT  
TCACTAGCGCCCGGAACTCTGCCT

>852

CAGCAATCGCGACAGCTAAAAACGGGTGTCTCGCTTCGACAATAGATCCCCGCGGACC  
TTCTGGCACCTGGTTCACTAGCGCCCGGAACTCTGCCTCGGGAGACTTATTGAAATCC  
GGATGCTCAAGCCGGGAGGCGCG

>853

TCACTAGCGCCCGGAACTCTGCCTCGGGAGACTTATTGAAATCCGGATGCTCAAGCC  
GGGAGGCGCGCAGTAACCAGGAGGATGAGAGGGCCGGGTTTGGGCTAGGAAAGCGG  
CCTTTTAAAACAGATGTCAGGGGGAC

>854

CGGGAGACTTATTGAAATCCGGATGCTCAAGCCGGGAGGCGCGCAGTAACCAGGAGG  
ATGAGAGGGCCGGGTTTGGGCTAGGAAAGCGGCCTTTTAAAACAGATGTCAGGGGGA  
CTGCAGCCCCGAGCCATGAGAAAAAA

>855

GGAGGCGCGCAGTAACCAGGAGGATGAGAGGGCCGGGTTTGGGCTAGGAAAGCGGC  
CTTTTAAAACAGATGTCAGGGGGACTGCAGCCCCGAGCCATGAGAAAAAAGTTAAAG  
GCGAGATGACACGCACTGAATTGGGGC

>856

GTTTGGGCTAGGAAAGCGGCCTTTTAAAACAGATGTCAGGGGGACTGCAGCCCCGAG  
CCATGAGAAAAAAGTTAAAGGCGAGATGACACGCACTGAATTGGGGCAAACATTGGA  
AGAGGAGACAAAAGTGCCTGCTTGGAG

>857

GAGAAAAAAGTTAAAGGCGAGATGACACGCACTGAATTGGGGCAAACATTGGAAGAG  
GAGACAAAAGTGCCTGCTTGGAGCACCGGGGTGCGGGGAGGGGGGGACAAAACCCGT  
ATCCAGTGCAAATTTAAATCTTGGGAG

>858

GCGAGATGACACGCACTGAATTGGGGCAAACATTGGAAGAGGAGACAAAAGTGCCTG  
CTTGAGCACCGGGGTGCGGGGAGGGGGGGACAAAACCCGTATCCAGTGCAAATTTAA  
ATCTTGGGAGTAGGTGGGGGCTGCTG

>859

GCAAACATTGGAAGAGGAGACAAAAGTGCCTGCTTGGAGCACCGGGGTGCGGGGAGG  
GGGGGACAAAACCCGTATCCAGTGCAAATTTAAATCTTGGGAGTAGGTGGGGGCTGCT  
GCGCGCCCTCACCTCAGTTCCCCT

>860

CGTGCTTGAGCACCGGGGTGCGGGGAGGGGGGACAAAACCCGTATCCAGTGCAAAT  
TAAAATCTTGGGAGTAGGTGGGGGCTGCTGCGCGCCCTTACCCTCAGTTCCTTATTA  
AGGATTCTGAGTCCCCATGCACTC

>861

CTTGAGCACCGGGGTGCGGGGAGGGGGGACAAAACCCGTATCCAGTGCAAATAAA  
ATCTTGGGAGTAGGTGGGGGCTGCTGCGCGCCCTTACCCTCAGTTCCTTATTAAGGA  
TTCTGAGTCCCCATGCACTCCTGT

>862

CAAAACCCGTATCCAGTGCAAATAAAATCTTGGGAGTAGGTGGGGGCTGCTGCGCGC  
CCTTACCCTCAGTTCCTTATTAAGGATTCTGAGTCCCCATGCACTCCTGTCTCTGGC  
TCCTTCTTCTCTCCGCTCGG

>863

TTAAAATCTTGGGAGTAGGTGGGGGCTGCTGCGCGCCCTTACCCTCAGTTCCTTATT  
AAGGATTCTGAGTCCCCATGCACTCCTGTCTCTGGCTCCTTCTTCTCTCCGCTCGG  
CCGGTGAGAGGCGGCCCGCGC

>864

AGGTGGGGGCTGCTGCGCGCCCTTACCCTCAGTTCCTTATTAAGGATTCTGAGTCCC  
CATGCACTCCTGTCTCTGGCTCCTTCTTCTCTCCGCTCGGCCGGTGAGAGGCGGCC  
GCCGGCGCCCCAGCAGCAGCTA

>865

CCCCTATTAAGGATTCTGAGTCCCCATGCACTCCTGTCTCTGGCTCCTTCTTCTCTC  
CGCTCGGCCGGTGAGAGGCGGCCCGCGCCCCAGCAGCAGCTAGATGTCAGGCCGA  
AGCCCGGAGCGCGGAGCGCGGGG

>866

CTCTGGCTCCTTCTTCTCTCCGCTCGGCCGGTGAGAGGCGGCCCGCGCCCCAG  
CAGCAGCTAGATGTCAGGCCAAGCCCGGAGCGCGGAGCGCGGGGAAGGGAGGGGAA  
GGGAGGGGAGGGGAAAGGAGGGGTGG

>867

AGATGTCAGGCCAAGCCCGGAGCGCGGAGCGCGGGGAAGGGAGGGGAAGGGAGGG  
GAGGGGAAAGGAGGGGTGGGGCGGGAGCGCGCGGGGCTCGGCCAGTGCGGGGTG  
GTGGGCGGGCTGAGCCCGGGACGGCGCG

>868

CGGGGAAGGGAGGGGAAGGGAGGGGAGGGGAAAGGAGGGGTGGGGCGGGGAGCGC  
GCGCGGGCTCGGCCAGTGCGGGGTGGTGGGCGGGCTGAGCCCGGGACGGCGCGGG  
AGGGGGGAGGGAAGGGGGGACGCTGTGGG

>869

GGGAGGGGAAGGGAGGGGAGGGGAAAGGAGGGGTGGGGCGGGGAGCGCGCGGGG  
CTCGGCCAGTGCGGGGTGGTGGGCGGGCTGAGCCCGGGACGGCGCGGGAGGGGGG  
AGGGAAGGGGGGACGCTGTGGGCAGGGAG

>870

GGCCAGTGCGGGGTGGTGGGCGGGCTGAGCCCGGGACGGCGCGGGAGGGGGGAGG  
GAAGGGGGGACGCTGTGGGCAGGGAGCCGGGCTCGGCCGCCAGCACTAAAGATGGA  
GAGGCGCGGGGCTTGCAGGGGAGGGG

>871

GGGAGCCGGGCTCGGCCGCCAGCACTAAAGATGGAGAGGCGCGGGGCCTTGCAGGG



GAGGGGGCTCGGCGTTGACGTGGGACGCGGCGGAGGGCGCAGCAGCCGGTGGTGATTT  
GCTAACCTCGCAGCAGAGAGGAGTTG

>872

CGGGCTCGGCCGCCAGCACTAAAGATGGAGAGGGCGCCGGGGCCTTGCAGGGGAGGG  
GGCTCGGCGTTGACGTGGGACGCGGCGGAGGGCGCAGCAGCCGGTGGTGATTTGCTAA  
CCTCGCAGCAGAGAGGAGTTGAGGGCG

>873

AGAGGCGCCGGGGCCTTGCAGGGGAGGGGGCTCGGCGTTGACGTGGGACGCGGCGG  
AGGGCGCAGCAGCCGGTGGTGATTTGCTAACCTCGCAGCAGAGAGGAGTTGAGGGCGA  
TGAGAGCGGGTACTGCGAACTGCCGGG

>874

GGCGCCGGGGCCTTGCAGGGGAGGGGGCTCGGCGTTGACGTGGGACGCGGCGGAGG  
CGCAGCAGCCGGTGGTGATTTGCTAACCTCGCAGCAGAGAGGAGTTGAGGGCGATGA  
GAGCGGGTACTGCGAACTGCCGGGCGA

>875

CGGCGTTGACGTGGGACGCGGCGGAGGGCGCAGCAGCCGGTGGTGATTTGCTAACCTC  
GCAGCAGAGAGGAGTTGAGGGCGATGAGAGCGGGTACTGCGAACTGCCGGGCGATGC  
TGTCGCTGCCGCCGTGATACGGAGAG

>876

GCGGAGGGCGCAGCAGCCGGTGGTGATTTGCTAACCTCGCAGCAGAGAGGAGTTGAGG  
GCGATGAGAGCGGGTACTGCGAACTGCCGGGCGATGCTGTCGCTGCCGCCGTGATACG  
GAGAGCAACAGTTCCCCAGCAACAC

>877

TTTGCTAACCTCGCAGCAGAGAGGAGTTGAGGGCGATGAGAGCGGGTACTGCGAACT  
GCCGGGCGATGCTGTCGCTGCCGCCGTGATACGGAGAGCAACAGTTCCCCAGCAACA  
CCCCTCCCCGACACAGGCACACACCC

>878

GCAGCAGAGAGGAGTTGAGGGCGATGAGAGCGGGTACTGCGAACTGCCGGGCGATGC  
TGTCGCTGCCGCCGTGATACGGAGAGCAACAGTTCCCCAGCAACACCCCTCCCCGACA  
CAGGCACACACCCCCGACAGGCAC

>879

CAGTTCCCCAGCAACACCCCTCCCCGACACAGGCACACACCCCCCGACAGGCACGCA  
CACCCACCCACAGTGCCCGGCTCGGCTGCGGTGAGTGAGGGGCCGGGAAGAGGGCGC  
ACCGCCAGCGAGCGCCGCGCGCCG

>880

CCTCCCCGACACAGGCACACACCCCCGACAGGCACGCACACCCACCCACAGTGCC  
CGGCTCGGCTGCGGTGAGTGAGGGGCCGGGAAGAGGGCGCACCGCCAGCGAGCGCC  
GCGCGCCGGGGCTTCCCGGGGCTGGAG

>881

GAGTGAGGGGCCGGGAAGAGGGCGCACCGCCAGCGAGCGCCGCGCGCCGGGGCTTC  
CCGGGGCTGGAGAGGTCTGGGGGGCGCGGCTCGCTTCGGCCACTCGGCCGCTGGGC  
TTGTGCCTTTTTTATTTGGCGTGTTC

>882

GCCGGGGCTTCCCGGGGCTGGAGAGGTCTGGGGGGCGCGGCTCGCTTCGGCCACTC  
GGCCGCTGGGCTTGTGCCTTTTTTATTTGGCGTGTCCCTTCCTGCCGCTGCAGCCGTC  
GCCGCCACCGTTGGGGGTCGGCT

>883

TGGAGAGGTCTGGGGGGCGCGCTCGCTTCGGCCACTCGGCCGCTGGGCTTGTGCC  
TTTTTTATTTGGCGTGTTCCTTCCTGCCGCTGCAGCCGTCGCCGCCACCGTTGGGGG  
TCGGCTAGAAGGGGGAGCCCCGGC

>884

CGCTTCGGCCACTCGGCCGCTGGGCTTGTGCCTTTTTTATTTGGCGTGTTCCTTCCTG  
CCGCTGCAGCCGTCGCCGCCACCGTTGGGGTTCGGCTAGAAGGGGGAGCCCCGGCT  
GTCAGCCTGGGCGCAGCTGCCTCC

>885

CGGCCGCTGGGCTTGTGCCTTTTTTATTTGGCGTGTTCCTTCCTGCCGCTGCAGCCGT  
CGCCGCCACCGTTGGGGTTCGGCTAGAAGGGGGAGCCCCGGCTGTCAGCCTGGGCG  
CAGCTGCCTCCCCAGCCCTTCCTC

>886

TGGGCTTGTGCCTTTTTTATTTGGCGTGTTCCTTCCTGCCGCTGCAGCCGTCGCCGCC  
ACCGTTGGGGTTCGGCTAGAAGGGGGAGCCCCGGCTGTCAGCCTGGGCGCAGCTGC  
CTCCCCAGCCCTTCCTTCAGGG

>887

TGTTCCCTTCCTGCCGCTGCAGCCGTCGCCGCCACCGTTGGGGTTCGGCTAGAAGGG  
GGAGCCCCGGCTGTCAGCCTGGGCGCAGCTGCCTCCCCAGCCCTTCCTTCAGGGCA  
CGGTCGGGGTGAGAGGTGGGGGGC

>888

GCTAGAAGGGGGAGCCCCGGCTGTCAGCCTGGGCGCAGCTGCCTCCCCAGCCCTTCCT  
CTTCAGGGCACGGTCGGGGTGAGAGGTGGGGGGCGTAGCGGTGTGCGGGGGCTGAG  
GGCGTGAGCAGAGGGGTCGGGGATCC

>889

AGGGGGAGCCCCGGCTGTCAGCCTGGGCGCAGCTGCCTCCCCAGCCCTTCCTTCAG  
GGCACGGTCGGGGTGAGAGGTGGGGGGCGTAGCGGTGTGCGGGGGCTGAGGGCGTG  
AGCAGAGGGGTCGGGGATCCGGAGGC

>890

GTCAGCCTGGGCGCAGCTGCCTCCCCAGCCCTTCCTTCAGGGCACGGTCGGGGTGA  
GAGGTGGGGGGCGTAGCGGTGTGCGGGGGCTGAGGGCGTGAGCAGAGGGGTCGGGG  
ATCCGGAGGCTTTGTACCGCCAGGGG

>891

CTGGGCGCAGCTGCCTCCCCAGCCCTTCCTTCAGGGCACGGTCGGGGTGAGAGGT  
GGGGGGCGTAGCGGTGTGCGGGGGCTGAGGGCGTGAGCAGAGGGGTCGGGGATCCG  
GAGGCTTTGTACCGCCAGGGGCTGGCG

>892

CAGCCCTTCCTTCAGGGCACGGTCGGGGTGAGAGGTGGGGGGCGTAGCGGTGTGC  
GGGGGCTGAGGGCGTGAGCAGAGGGGTCGGGGATCCGGAGGCTTTGTACCGCCAGGG  
GCTGGCGGAGCAACAGAGCCCGTGGG

>893

TTCAGGGCACGGTCGGGGTGAGAGGTGGGGGGCGTAGCGGTGTGCGGGGGCTGAGG  
GCGTGAGCAGAGGGGTCGGGGATCCGGAGGCTTTGTACCGCCAGGGGCTGGCGGAGC  
AACAGAGCCCGTGGGTGCTTATGTA

>894

AGGGCGTGAGCAGAGGGGTCGGGGATCCGGAGGCTTTGTACCGCCAGGGGCTGGCGG

AGCAACAGAGCCCGTGGGTGCTCTTATGTATGCGGACCGGTGCGCGGGCGCAAGATAA  
GGTTGTGGTTATTTATTTGTGTGT

>895

CGTGAGCAGAGGGGTCGGGATCCGGAGGCTTTGTACCGCCAGGGGCTGGCGGAGCA  
ACAGAGCCCGTGGGTGCTCTTATGTATGCGGACCGGTGCGCGGGCGCAAGATAAGGTT  
GTGGTTTATTTATTTGTGTGTTTAT

>896

GGGGCTGGCGGAGCAACAGAGCCCGTGGGTGCTCTTATGTATGCGGACCGGTGCGCG  
GGCGCAAGATAAGGTTGTGGTTATTTATTTGTGTGTTTATTCGCCGGCCGGCTGGGAA  
GCTAGAATCGGAGGAGCTGACGAG

>897

GCTGGCGGAGCAACAGAGCCCGTGGGTGCTCTTATGTATGCGGACCGGTGCGCGGGC  
GCAAGATAAGGTTGTGGTTTATTTATTTGTGTGTTTATTCGCCGGCCGGCTGGGAAGCT  
AGAATCGGAGGAGCTGACGAGTAG

>898

CCGTGGGTGCTCTTATGTATGCGGACCGGTGCGCGGGCGCAAGATAAGGTTGTGGTTTA  
TTTATTTGTGTGTTTATTCGCCGGCCGGCTGGGAAGCTAGAATCGGAGGAGCTGACGA  
GTAGATCTGGGGCGGAGGGGAG

>899

GGTTGTGGTTTATTTATTTGTGTGTTTATTCGCCGGCCGGCTGGGAAGCTAGAATCGGA  
GGAGCTGACGAGTAGATCTGGGGCGGAGGGGAGCAGGACTGGGACTGCTTACGTTT  
TGTTTCTCTTTGAGAAAACGTGGT

>900

GGGAAGCTAGAATCGGAGGAGCTGACGAGTAGATCTGGGGCGGAGGGGAGCAGGA  
CTGGGACTGCTTACGTTTTGTTTCTCTTTGAGAAAACGTGGTGGGCTTTTTCTTGATTG  
GACTTGATCCCCACCCCCTTTTGC

>901

GCTAGAATCGGAGGAGCTGACGAGTAGATCTGGGGCGGAGGGGAGCAGGACTGGG  
ACTGCTTACGTTTTGTTTCTCTTTGAGAAAACGTGGTGGGCTTTTTCTTGATTGACTT  
GATCCCCACCCCCTTTTGCAGGGG

>902

GACGAGTAGATCTGGGGCGGAGGGGAGCAGGACTGGGACTGCTTACGTTTTGTTTCT  
CTTTGAGAAAACGTGGTGGGCTTTTTCTTGATTGACTTGATCCCCACCCCCTTTTGC  
AGGGGAGGGAGGGAAGCTCCAGA

>903

GGTGGGCTTTTTCTTGATTGACTTGATCCCCACCCCCTTTTGCAGGGGAGGGAGGG  
AAGCTCCAGAGGGTCTGACGCGCTGCGGGCCCTCCTCGGCTCTCGGCGGGACCGGCG  
GTGACACCGGAGCTCGCCGTGCGCT

>904

AGGGGAGGGAGGGAAGCTCCAGAGGGTCTGACGCGCTGCGGGCCCTCCTCGGCTCTC  
GGCGGGACCGGCGGTGACACCGGAGCTCGCCGTGCGCTCCCGGCCGCTCTCGGTGGG  
TGCCGGTCTCTGCACCTGATGCGTTC

>905

CCAGAGGGTCTGACGCGCTGCGGGCCCTCCTCGGCTCTCGGCGGGACCGGCGGTGAC  
ACCGGAGCTCGCCGTGCGCTCCCGGCCGCTCTCGGTGGGTGCCGGTCTCTGCACCTGA  
TGCGTTCGGGATGCCTTTCCACCC

>906

GGGCCCTCCTCGGCTCTCGGCGGGACCGGCGGTGACACCGGAGCTCGCCGTGCGCTC  
CCGGCCGCTCTCGGTGGGTGCCGGTCTCTGCACCTGATGCGTTCGGGATGCCTTTCCC  
ACCCTGGCGCGCCCGCCGCTAGCTC

>907

CCTCCTCGGCTCTCGGCGGGACCGGCGGTGACACCGGAGCTCGCCGTGCGCTCCCGG  
CCGCTCTCGGTGGGTGCCGGTCTCTGCACCTGATGCGTTCGGGATGCCTTTCCACCCT  
GGCGCGCCCGCCGCTAGCTCGCAC

>908

GGCGGTGACACCGGAGCTCGCCGTGCGCTCCCGGCCGCTCTCGGTGGGTGCCGGTCT  
CTGCACCTGATGCGTTCGGGATGCCTTTCCACCCTGGCGCGCCCGCCGCTAGCTCGC  
ACAGCGCCTCGCACACTCCCGCACG

>909

CACCTTGGCGCGCCCGCCGCTAGCTCGCACAGCGCCTCGCACACTCCCGCACGCGCTT  
GAAATGCGCACGGTCCCGCCGGCCCGCGGAACCACCGGACGCACGGAGCGCTCCGC  
ACCGACTCGCTCGCCGCTCCCGA

>910

CGCGGAACCACCGGACGCACGGAGCGCTCCGCACCGACTCGCTCGCCGCTCCCGG  
AGACGCTCGCACCGTGCTTGGGCCGGGCGCGCTGGCCGCTGGCGCCGCTGGCCAGAG  
GCCTGGGACCCAGCCGGTCGCTCCCA

>911

CGCTCGACCGTGCTTGGGCCGGGCGCGCTGGCCGCTGGCGCCGCTGGCCAGAGGCC  
TGGGACCCAGCCGGTCGCTCCAGGGGGTACGGCCCTGGGTCGGAGAGGGAGGGC  
GGGACAGACCCCTTCTCGCCTTTCTCC

>912

TTGGGCCGGGCGCGCTGGCCGCTGGCGCCGCTGGCCAGAGGCCTGGGACCCAGCCGG  
TCGCTCCAGGGGGTACAGCCCTGGGTCCGAGAGGGAGGGCGGGCAGACCCCTTCT  
CGCCTTTCTCCACAACCTCGCTGCG

>913

CCTGGGTCCGAGAGGGAGGGCGGGCAGACCCCTTCTCGCCTTTCTCCACAACCTCG  
CTCGGGGGCTTTGTGCTTCCCTTCGCCGCGGGGCGGGTCCGCCTCCCTGCCGCTC  
TCGCCGCGGAGTCCAGCCCGCCCG

>914

AGACCCCTTCTCGCCTTTCTCCACAACCTCGCTGCGGGGCTTTGTGCTTCCCTTCG  
CCGCGGGGCGGGTCCGCCTCCCTGCCGCTCTCGCCGCGGAGTCCAGCCCGCCCGGA  
CTGTCGCCGTTCTCCCGTCTCT

>915

CGCTGCGGGGCTTTGTGCTTCCCTTCGCCGCGGGGCGGGTCCGCCTCCCTGCCGC  
TCTCGCCGCGGAGTCCAGCCCGCCCGACTGTGCGCGTTCCTCCCGTCTCTTTGCTT  
TCCCTCGTCCCTAGCTCAGCTCT

>916

CTTCCCTTCGCCGCGGGGCGGGTCCGCCTCCCTGCCGCTCTCGCCGCGGAGTCCAG  
CCCGCCCGACTGTGCGCGTTCCTCCCGTCTCTTTGCTTTCCCTCGTCCCTAGCTCA  
GCTCTCCTTCTTCAGGAGTCTA

>917

CTTCGCCGCGGGGCGGGTCCGCCTCCCTGCCGCTCTCGCCGCGGAGTCCAGCCCGCC

CGGACTGTCGCCGTTCTCCCCGTCTTTTCGCTTCCCTCGTCCCTAGCTCAGCTCTC  
CTTCTTTCAGGAGTCTAGCTCCT

>918

GGGCGGGTCCGCCTCCCCTGCCGCTCTCGCCGCGGAGTCCAGCCCGCCCGACTGTGC  
CCGTTCTCCCCGTCTTTTCGCTTCCCTCGTCCCTAGCTCAGCTCTCCTTCTTTCAGG  
AGTCTAGCTCCTCGGGAAAAGT

>919

GGACTGTCGCCGTTCTCCCCGTCTTTTCGCTTCCCTCGTCCCTAGCTCAGCTCTCCT  
TCTTTCAGGAGTCTAGCTCCTCGGGAAAAGTTGCTTCCCAAGTTTGCTGAAGTCGTC  
TCCAAGTCTCGGTGGGGGTGCG

>920

CCGTCTTTTCGCTTCCCTCGTCCCTAGCTCAGCTCTCCTTCTTTCAGGAGTCTAGCTC  
CTCGGGAAAAGTTGCTTCCCAAGTTTGCTGAAGTCGTCCTCAAGTCTCGGTGGGGGT  
CGCTGGGAACTGGGGGGGTG

>921

CCCTAGCTCAGCTCTCCTTCTTTCAGGAGTCTAGCTCCTCGGGAAAAGTTGCTTCCCA  
AGTTTGCTGAAGTCGTCCTCAAGTCTCGGTGGGGGTGCTGGGAACTGGGGGGGTGT  
GAGAGCGCGGTGATCCCCGAGC

>922

CTCTCCTTCTTTCAGGAGTCTAGCTCCTCGGGAAAAGTTGCTTCCCAAGTTTGCTGAA  
GTCGTCTCAAGTCTCGGTGGGGGTGCTGGGAACTGGGGGGGTGTGAGAGCGCGGT  
CGATCCCCGAGCTCGGGCGGGTT

>923

TTCTTTCAGGAGTCTAGCTCCTCGGGAAAAGTTGCTTCCCAAGTTTGCTGAAGTCGT  
CTCAAGTCTCGGTGGGGGTGCTGGGAACTGGGGGGGTGTGAGAGCGCGGTGATC  
CCCGGAGCTCGGGCGGGTTATCGCC

>924

GAAAAGTTGCTTCCCAAGTTTGCTGAAGTCGTCCTCAAGTCTCGGTGGGGGTGCTG  
GGAAGTGGGGGGGTGTGAGAGCGCGGTGATCCCCGAGCTCGGGCGGGTTATCGCC  
GGCTTCCCCGCGCCGCTGGACT

>925

CAAGTCTCGGTGGGGGTGCTGGGAACTGGGGGGGTGTGAGAGCGCGGTGATCCCC  
GGAGCTCGGGCGGGTTATCGCCGGCTTCCCCGCGCCGCTGGACTGGACGCTGCAG  
CCAGCGCCAGCCGATCGCGGGCGC

>926

GCTTCCCCGCGCCGCTGGACTGGACGCTGCAGCCAGCGCCAGCCGGATCGCGGG  
CGCCGAGCGGGGGTGGGGGAGACGGCTGCCCCGTGGGCGCCAGATTTCCCTCAGG  
ACCAAAAAGCTTGTTCAGGGCGCC

>927

GACTGGACGCTGCAGCCAGCGCCAGCCGGATCGCGGGCGCCGAGCGGCGGGTGGGG  
GAGACGGCTGCCCGTGGGCGCCAGATTTCCCTCAGGACCCAAAAGCTTGTTCAG  
GGCGCAAGCTTCCATTCTTTGGCT

>928

CGCCGAGCGGGGGTGGGGGAGACGGCTGCCCCGTGGGCGCCAGATTTCCCTCAGG  
ACCAAAAAGCTTGTTCAGGGCGCCAAGCTTCCATTCTTTGGCTGTTCCCTCCTAG  
TTCTCAGAAACCCGATGTCTGCG

>929

GTGGGCGCCCAGATTCCCTCAGGACCCAAAAAGCTTGTTTCAGGGCGCCAAGCTTCC  
ATTCTTTTGGCTGTTCCCTCCCTAGTTCTCAGAAACCCCGATGTCTGCGGGAAAGCACG  
CGGTGGCTCGGCTCGGCTGAATG

>930

ATTTCCCTCAGGACCCAAAAAGCTTGTTTCAGGGCGCCAAGCTTCCATTCTTTGGCTG  
TTCCTCCCTAGTTCTCAGAAACCCCGATGTCTGCGGGAAAGCACGCGGTGGCTCGGC  
TCGGCTGAATGGTCATCCCAACC

>931

AAAGCTTGTTTCAGGGCGCCAAGCTTCCATTCTTTGGCTGTTCCCTCCCTAGTTCTCA  
GAAACCCCGATGTCTGCGGGAAAGCACGCGGTGGCTCGGCTCGGCTGAATGGTCATCC  
CAACCTTGACGGCCTCCGTCCCC

>932

GTTCCCTCCCTAGTTCTCAGAAACCCCGATGTCTGCGGGAAAGCACGCGGTGGCTCGG  
CTCGGCTGAATGGTCATCCCAACCTTGACGGCCTCCGTCCCCACCCCGGGGCGGGCAG  
CAAAAATGTCTTGACCAGCCGTCC

>933

CCCGATGTCTGCGGGAAAGCACGCGGTGGCTCGGCTCGGCTGAATGGTCATCCCAACC  
TTGACGGCCTCCGTCCCCACCCCGGGGCGGGCAGCAAAAATGTCTTGACCAGCCGTCC  
TGTGAATCCTTTCTGCGTGAGCTT

>934

CTCGGCTCGGCTGAATGGTCATCCCAACCTTGACGGCCTCCGTCCCCACCCCGGGGCG  
GGCAGCAAAAATGTCTTGACCAGCCGTCTGTGAATCCTTTCTGCGTGAGCTTGGTGG  
CTCCTGAACTGATAGAGCTCCTC

>935

AATGGTCATCCCAACCTTGACGGCCTCCGTCCCCACCCCGGGGCGGGCAGCAAAAATG  
TCTTGACCAGCCGTCTGTGAATCCTTTCTGCGTGAGCTTGGTGGCTCCTGAACTGATA  
GAGCTCCTTCTGGGGGTGGAGGC

>936

CGGCCTCCGTCCCCACCCCGGGGCGGGCAGCAAAAATGTCTTGACCAGCCGTCTGTG  
AATCCTTTCTGCGTGAGCTTGGTGGCTCCTGAACTGATAGAGCTCCTTCTGGGGGTGG  
AGGCAAGCAAGCAGTGTTCAAGA

>937

GACCAGCCGTCTGTGAATCCTTTCTGCGTGAGCTTGGTGGCTCCTGAACTGATAGAG  
CTCCTTCTGGGGGTGGAGGCAAGCAAGCAGTGTTCAAGAGTGAGGGAGAGACCTTG  
CTGTTCTTGCTCTCAGTGCATTCA

>938

ATCCTTTCTGCGTGAGCTTGGTGGCTCCTGAACTGATAGAGCTCCTTCTGGGGGTGGA  
GGCAAGCAAGCAGTGTTCAAGAGTGAGGGAGAGACCTTGCTGTTCTTCTGCTCTCAG  
TGCATTCACTGCAATATTGGTCGCT

>939

AACTGATAGAGCTCCTTCTGGGGGTGGAGGCAAGCAAGCAGTGTTCAAGAGTGAGG  
GAGAGACCTTGCTGTTCTTCTGCTCTCAGTGCATTCACTGCAATATTGGTCGCTGTAAGA  
CAGACACGGGGAGGGTCTGGGCC

>940

CTTCTGGGGGTGGAGGCAAGCAAGCAGTGTTCAAGAGTGAGGGAGAGACCTTGCTG

TTCTTGCTCTCAGTGCATTCACTGCAATATTGGTCGCTGTAAGACAGACACGGGGAG  
GGTCCTGGGCCTGCGCGGTCTTTCT

>941

CAAGCAGTGTTCGAAGAGTGAGGGAGAGACCTTGCTGTTCTTGCTCTCAGTGCATT  
ACTGCAATATTGGTCGCTGTAAGACAGACACGGGGAGGGTCCTGGGCCTGCGCGGTCT  
TTCTAACACTCCTTTAAGCGAGGT

>942

AGACCTTGCTGTTCTTGCTCTCAGTGCATTCACTGCAATATTGGTCGCTGTAAGACAG  
ACACGGGGAGGGTCCTGGGCCTGCGCGGTCTTTCTAACACTCCTTTAAGCGAGGTTTG  
GAGTCTAGGAGCCCTCTTATTGA

>943

TGCTCTCAGTGCATTCACTGCAATATTGGTCGCTGTAAGACAGACACGGGGAGGGTCC  
TGGGCCTGCGCGGTCTTTCTAACACTCCTTTAAGCGAGGTTTGGAGTCTAGGAGCCCT  
CTTATTGATCCCGGACAGGCTCTG

>944

TGGTCGCTGTAAGACAGACACGGGGAGGGTCCTGGGCCTGCGCGGTCTTTCTAACACT  
CCTTTAAGCGAGGTTTGGAGTCTAGGAGCCCTCTTATTGATCCCGGACAGGCTCTGGG  
AGAGGCCTTTGTTTCCAGCCCTG

>945

CTCCTTTAAGCGAGGTTTGGAGTCTAGGAGCCCTCTTATTGATCCCGGACAGGCTCTGG  
GAGAGGCCTTTGTTTCCAGCCCTGTCTTCCCTTCGACTGGTTGTAACACACCACA  
GGTGCTGGTGCCAATATCACTT

>946

TAGGAGCCCTCTTATTGATCCCGGACAGGCTCTGGGAGAGGCCTTTGTTTCCAGCCCT  
GTCTTCCCTTCGACTGGTTGTAACACACCACAGGTGCTGGTGCCAATATCACTTCC  
AGCGCCTCTGAGCCATGTCCAG

>947

CCCTCTTATTGATCCCGGACAGGCTCTGGGAGAGGCCTTTGTTTCCAGCCCTGTCTTC  
CCTTCGACTGGTTGTAACACACCACAGGTGCTGGTGCCAATATCACTTCCAGCGCC  
TCTGAGCCATGTCCAGCATCCC

>948

CAGGCTCTGGGAGAGGCCTTTGTTTCCAGCCCTGTCTTCCCTTCGACTGGTTGTAAC  
TCACACCACAGGTGCTGGTGCCAATATCACTTCCAGCGCCTCTGAGCCATGTCCAGCAT  
CCCTTGCTGCCCTGGTCACAG

>949

CCCTTCGACTGGTTGTAACACACCACAGGTGCTGGTGCCAATATCACTTCCAGCGC  
CTCTGAGCCATGTCCAGCATCCCTTGCTGCCCTGGTCACAGGACTTGCAGACTCCTTG  
GAGCCTGTGGGACACACGTGGA

>950

ACCACAGGTGCTGGTGCCAATATCACTTCCAGCGCCTCTGAGCCATGTCCAGCATCCCT  
TGCTGCCCTGGTCACAGGACTTGCAGACTCCTTGAGCCTGTGGGACACACGTGGA  
GTTACACACCCAGCCCAGCATGA

>951

AGCGCCTCTGAGCCATGTCCAGCATCCCTTGCTGCCCTGGTCACAGGACTTGCAGAC  
TCCTTGAGCCTGTGGGACACACGTGGAGTTCACACACCCAGCCCAGCATGAGCACT  
CCTGGCTGTAGGGGACCATATTTAA

>952

GCCATGTCCAGCATCCCTTGCTGCCCTGGTCACAGGACTTGCAGACTCCTTGGAGCC  
TGTGGGACACACGTGGAGTTCACACACCCAGCCCAGCATGAGCACTCCTGGCTGTAG  
GGGACCATATTTAACTATGGTCTCT

>953

GCAGACTCCTTGGAGCCTGTGGGACACACGTGGAGTTCACACACCCAGCCCAGCATG  
AGCACTCCTGGCTGTAGGGGACCATATTTAACTATGGTCTCTCTCCATACCTTAATGACC  
CATCCTTCTTCGTTTTTTAGATC

>954

ACACACGTGGAGTTCACACACCCAGCCCAGCATGAGCACTCCTGGCTGTAGGGGACC  
ATATTTAACTATGGTCTCTCTCCATACCTTAATGACCCATCCTTCTTCGTTTTTTAGATCC  
TCCTGTCCACCGGGCAGTTGTG

>955

GCACTCCTGGCTGTAGGGGACCATATTTAACTATGGTCTCTCTCCATACCTTAATGACCC  
ATCCTTCTTCGTTTTTTAGATCCTCCTGTCCACCGGGCAGTTGTGGGCAGGAGGGTAGG  
TACGACACCTTACGTAAGTGT

>956

GGACCATATTTAACTATGGTCTCTCTCCATACCTTAATGACCCATCCTTCTTCGTTTTTTA  
GATCCTCCTGTCCACCGGGCAGTTGTGGGCAGGAGGGTAGGTACGACACCTTACGTAA  
GTGTGTGTGTGTAACACACA

>957

ACTATGGTCTCTCTCCATACCTTAATGACCCATCCTTCTTCGTTTTTTAGATCCTCCTGTC  
CACCGGGCAGTTGTGGGCAGGAGGGTAGGTACGACACCTTACGTAAGTGTGTGTGTGT  
AAACACACACACTTTTTTTT

>958

CCTTAATGACCCATCCTTCTTCGTTTTTTAGATCCTCCTGTCCACCGGGCAGTTGTGGGC  
AGGAGGGTAGGTACGACACCTTACGTAAGTGTGTGTGTGTAACACACACACACTTTT  
TTTTTTTTTTCTGAGACGGAG

>959

CCTTCTTCGTTTTTTAGATCCTCCTGTCCACCGGGCAGTTGTGGGCAGGAGGGTAGGTA  
CGACACCTTACGTAAGTGTGTGTGTGTAACACACACACACTTTTTTTTTTTTTTTCTG  
AGACGGAGTTTTGCTCCTGTTG

>960

CTTCGTTTTTTAGATCCTCCTGTCCACCGGGCAGTTGTGGGCAGGAGGGTAGGTACGA  
CACCTTACGTAAGTGTGTGTGTGTAACACACACACACTTTTTTTTTTTTTTTCTGAGA  
CGGAGTTTTGCTCCTGTTGCCCA

>961

TCGTTTTTTAGATCCTCCTGTCCACCGGGCAGTTGTGGGCAGGAGGGTAGGTACGACA  
CCTTACGTAAGTGTGTGTGTGTAACACACACACACTTTTTTTTTTTTTTTCTGAGACG  
GAGTTTTGCTCCTGTTGCCAGG

>962

TAGATCCTCCTGTCCACCGGGCAGTTGTGGGCAGGAGGGTAGGTACGACACCTTACGT  
AAGTGTGTGTGTGTAACACACACACACTTTTTTTTTTTTTTTCTGAGACGGAGTTTTG  
CTCCTGTTGCCAGGCTGGAGTG

>963

GGTACGACACCTTACGTAAGTGTGTGTGTGTAACACACACACACTTTTTTTTTTTTTTT



TCTGAGACGGAGTTTTGCTCCTGTTGCCAGGCTGGAGTGCAGTGGCGCAATCTCGGC  
TCACGGCAACCTCCGCCTCCCGG

>964

TTACGTAAGTGTGTGTGTGTAACACACACACACTTTTTTTTTTTTTTCTGAGACGGA  
GTTTTGCTCCTGTTGCCAGGCTGGAGTGCAGTGGCGCAATCTCGGCTCACGGCAACC  
TCCGCCTCCCGTTTTCAAGTGAT

>965

TGTGTAACACACACACACTTTTTTTTTTTTTTCTGAGACGGAGTTTTGCTCCTGTTG  
CCCAGGCTGGAGTGCAGTGGCGCAATCTCGGCTCACGGCAACCTCCGCCTCCCGTTTT  
CAAGTGATTCTCCTGCCTCAGCC

>966

AGTTTTGCTCCTGTTGCCAGGCTGGAGTGCAGTGGCGCAATCTCGGCTCACGGCAAC  
CTCCGCCTCCCGTTTTCAAGTGATTCTCCTGCCTCAGCCTCCCGAGTAGCTGGGATTAC  
AGGCGGGTGCCACCGCGCCTGGC

>967

CTCCTGTTGCCAGGCTGGAGTGCAGTGGCGCAATCTCGGCTCACGGCAACCTCCGCC  
TCCCGTTTTCAAGTGATTCTCCTGCCTCAGCCTCCCGAGTAGCTGGGATTACAGGCGG  
GTGCCACCGCGCCTGGCTAATTTT

>968

TGGCGCAATCTCGGCTCACGGCAACCTCCGCCTCCCGTTTTCAAGTGATTCTCCTGCCT  
CAGCCTCCCGAGTAGCTGGGATTACAGGCGGGTGCCACCGCGCCTGGCTAATTTTGTAT  
TTTTTGTAGAGACGGGGCTTCT

>969

GCAACCTCCGCCTCCCGTTTTCAAGTGATTCTCCTGCCTCAGCCTCCCGAGTAGCTGG  
GATTACAGGCGGGTGCCACCGCGCCTGGCTAATTTTGTATTTTTTGTAGAGACGGGGCT  
TCTCCATGTTGGTCAGGCTGGTC

>970

GTGATTCTCCTGCCTCAGCCTCCCGAGTAGCTGGGATTACAGGCGGGTGCCACCGCGC  
CTGGCTAATTTTGTATTTTTTGTAGAGACGGGGCTTCTCCATGTTGGTCAGGCTGGTCTC  
GAACTCCCGACCTCAGGTGATC

>971

CTGCCTCAGCCTCCCGAGTAGCTGGGATTACAGGCGGGTGCCACCGCGCCTGGCTAAT  
TTTGTATTTTTTGTAGAGACGGGGCTTCTCCATGTTGGTCAGGCTGGTCTCGAACTCCC  
GACCTCAGGTGATCCGCCTGCCT

>972

GATTACAGGCGGGTGCCACCGCGCCTGGCTAATTTTGTATTTTTTGTAGAGACGGGGCT  
TCTCCATGTTGGTCAGGCTGGTCTCGAACTCCCGACCTCAGGTGATCCGCCTGCCTGG  
GCCTCCCAAAGTGCTGGGATTAG

>973

CGGGTGCCACCGCGCCTGGCTAATTTTGTATTTTTTGTAGAGACGGGGCTTCTCCATGT  
TGGTCAGGCTGGTCTCGAACTCCCGACCTCAGGTGATCCGCCTGCCTGGGCTCCCAA  
AGTGCTGGGATTAGAGGCGTGAG

>974

AATTTTGTATTTTTTGTAGAGACGGGGCTTCTCCATGTTGGTCAGGCTGGTCTCGAACT  
CCCGACCTCAGGTGATCCGCCTGCCTGGGCTCCCAAAGTGCTGGGATTAGAGGCGTG  
AGCCACCGCGCCTACCCACAC

>975

CTTCTCCATGTTGGTCAGGCTGGTCTCGAACTCCCGACCTCAGGTGATCCGCCTGCCTG  
GGCCTCCCAAAGTGCTGGGATTAGAGGCGTGAGCCACCGCGCCCTACCCACACACTC  
TTTCTGTCTGTCTCTGGCTGGTG

>976

GGCTGGTCTCGAACTCCCGACCTCAGGTGATCCGCCTGCCTGGGCCTCCCAAAGTGCT  
GGGATTAGAGGCGTGAGCCACCGCGCCCTACCCACACACTCTTTCTGTCTGTCTCTG  
GCTGGTGTACATACACACAGTTCA

>977

CTGCCTGGGCCTCCCAAAGTGCTGGGATTAGAGGCGTGAGCCACCGCGCCCTACCCCA  
CACACTCTTTCTGTCTGTCTCTGGCTGGTGTACATACACACAGTTCAGATTTTATATTAT  
ACATACAATAACTTTGAGGCTT

>978

AGTGCTGGGATTAGAGGCGTGAGCCACCGCGCCCTACCCACACACTCTTTCTGTCTG  
TCTCTGGCTGGTGTACATACACACAGTTCAGATTTTATATTATACATACAATAACTTTGA  
GGCTCCGTGGGTAGAAATGAC

>979

GAGGCGTGAGCCACCGCGCCCTACCCACACACTCTTTCTGTCTGTCTCTGGCTGGTG  
TACATACACACAGTTCAGATTTTATATTATACATACAATAACTTTGAGGCTTCCGTGGGT  
AGAAATGACCCAAGTTAGTGTG

>980

CTGTCTCTGGCTGGTGTACATACACACAGTTCAGATTTTATATTATACATACAATAACTTT  
GAGGCTTCCGTGGGTAGAAATGACCCAAGTTAGTGTGTGGGTTGTGTGTTCCTGTT  
AGTACCTAGGGATGGGGACAG

>981

CTCTGGCTGGTGTACATACACACAGTTCAGATTTTATATTATACATACAATAACTTTGAG  
GCTTCCGTGGGTAGAAATGACCCAAGTTAGTGTGTGGGTTGTGTGTTCCTGTTAGTA  
CCTAGGGATGGGGACAGGCCT

>982

ATACACACAGTTCAGATTTTATATTATACATACAATAACTTTGAGGCTTCCGTGGGTAGA  
AATGACCCAAGTTAGTGTGTGGGTTGTGTGTTCCTGTTAGTACCTAGGGATGGGGAC  
AGGCCTTGGGTCTGCCAGTGC

>983

ACACAGTTCAGATTTTATATTATACATACAATAACTTTGAGGCTTCCGTGGGTAGAAATG  
ACCCAAGTTAGTGTGTGGGTTGTGTGTTCCTGTTAGTACCTAGGGATGGGGACAGG  
CCTTGGGTCTGCCAGTGCTTTG

>984

ACATACAATAACTTTGAGGCTTCCGTGGGTAGAAATGACCCAAGTTAGTGTGTGGGTT  
GTGTGTTCCTGTTAGTACCTAGGGATGGGGACAGGCCTTGGGTCTGCCAGTGCTTTG  
CAGCCCTGAGAACAGTAGAAGGC

>985

GAAATGACCCAAGTTAGTGTGTGGGTTGTGTGTTCCTGTTAGTACCTAGGGATGGG  
GACAGGCCTTGGGTCTGCCAGTGCTTTGCAGCCCTGAGAACAGTAGAAGGCCAGAGG  
CCAAGGCTGATGGTGAGAGGATAGC

>986

CCAAGTTAGTGTGTGGGTTGTGTGTTCCTGTTAGTACCTAGGGATGGGGACAGGCC

TTGGGTCTGCCAGTGCTTTGCAGCCCTGAGAACAGTAGAAGGCCAGAGGCCAAGGCT  
GATGGTGAGAGGATAGCCTTTGCGG

>987

TGTGTTCTCTGTAGTACCTAGGGATGGGGACAGGCCTTGGGTCTGCCAGTGCTTTGCA  
GCCCTGAGAACAGTAGAAGGCCAGAGGCCAAGGCTGATGGTGAGAGGATAGCCTTTG  
CGGAGGAGAGCCCAGTGTCCATAGA

>988

GGACAGGCCTTGGGTCTGCCAGTGCTTTGCAGCCCTGAGAACAGTAGAAGGCCAGAG  
GCCAAGGCTGATGGTGAGAGGATAGCCTTTGCGGAGGAGAGCCCAGTGTCCATAGATT  
TCTGTGGCCATGGCTACAGGCTCCT

>989

CCCTGAGAACAGTAGAAGGCCAGAGGCCAAGGCTGATGGTGAGAGGATAGCCTTTGC  
GGAGGAGAGCCCAGTGTCCATAGATTTCTGTGGCCATGGCTACAGGCTCCTGGCCTCC  
AATGAGTTTGACTCTGCTTCTGGGG

>990

AGGCCAGAGGCCAAGGCTGATGGTGAGAGGATAGCCTTTGCGGAGGAGAGCCCAGTG  
TCCATAGATTTCTGTGGCCATGGCTACAGGCTCCTGGCCTCCAATGAGTTTGACTCTGC  
TTCTGGGGCTCCTGTAGTGAGGCA

>991

CCTTTGCGGAGGAGAGCCCAGTGTCCATAGATTTCTGTGGCCATGGCTACAGGCTCCT  
GGCCTCCAATGAGTTTGACTCTGCTTCTGGGGCTCCTGTAGTGAGGCAGAGTTTGAA  
AACTGTTTAAAGATAAGGCTTGA

>992

CATAGATTTCTGTGGCCATGGCTACAGGCTCCTGGCCTCCAATGAGTTTGACTCTGCTT  
CTGGGGCTCCTGTAGTGAGGCAGAGTTTGAAAACTGTTTAAAGATAAGGCTTGACA  
TCCAGGGGGCTGGCGTGAAGCTG

>993

AGATTTCTGTGGCCATGGCTACAGGCTCCTGGCCTCCAATGAGTTTGACTCTGCTTCTG  
GGGCTCCTGTAGTGAGGCAGAGTTTGAAAACTGTTTAAAGATAAGGCTTGACATCC  
AGGGGGCTGGCGTGAAGCTGACA

>994

GGCCATGGCTACAGGCTCCTGGCCTCCAATGAGTTTGACTCTGCTTCTGGGGCTCCTGT  
AGTGAGGCAGAGTTTGAAAACTGTTTAAAGATAAGGCTTGACATCCAGGGGGCTG  
GCGTGAAGCTGACAAGGAAGGGC

>995

GGCTCCTGGCCTCCAATGAGTTTGACTCTGCTTCTGGGGCTCCTGTAGTGAGGCAGAG  
TTTGAAAACTGTTTAAAGATAAGGCTTGACATCCAGGGGGCTGGCGTGAAGCTGAC  
AAGGAAGGGGCTAAAGTCTTGCTA

>996

GGGGCTCCTGTAGTGAGGCAGAGTTTGAAAACTGTTTAAAGATAAGGCTTGACATC  
CAGGGGGCTGGCGTGAAGCTGACAAGGAAGGGGCTAAAGTCTTGCTAATTTAAGTA  
AGTGCACTTCATCATAATGAATGTT

>997

GGAAAACTGTTTAAAGATAAGGCTTGACATCCAGGGGGCTGGCGTGAAGCTGACAA  
GGAAGGGGCTAAAGTCTTGCTAATTTAAGTAAGTGCACTTCATCATAATGAATGTTGG  
CCTTGCTAGGGAGCCCCTACTCT

>998

GATAAGGCTTGACATCCAGGGGGCTGGCGTGAAGCTGACAAGGAAGGGGCTAAAGTC  
TTGCTAATTTAAGTAAGTGCACCTTCATCATAATGAATGTTGGCCTTGCTAGGGAGCCC  
CTACTCTCAGACACAGAGAAAGC

>999

GGCGTGAAGCTGACAAGGAAGGGGCTAAAGTCTTGCTAATTTAAGTAAGTGCACCTTC  
ATCATAATGAATGTTGGCCTTGCTAGGGAGCCCCTACTCTCAGACACAGAGAAAGCT  
GAGGACTTATAGGACTTCACTACA

>1000

CTCAGACACAGAGAAAGCTGAGGACTTATAGGACTTCACTACAATTTTCATTTCACTTC  
ATCTAACAGATGTCATAGAGTAGTGAATTAGGCATCTGCTGTGGCAGAACCTTCTTTTT  
ACTCTCAGCATCCCTGGCTTGA

>1001

CAGAGAAAGCTGAGGACTTATAGGACTTCACTACAATTTTCATTTCACTTCATCTAACA  
GATGTCATAGAGTAGTGAATTAGGCATCTGCTGTGGCAGAACCTTCTTTTTACTCTCAG  
CATCCCTGGCTTGAAGGCAGA

>1002

AGGACTTCACTACAATTTTCATTTCACTTCATCTAACAGATGTCATAGAGTAGTGAATTA  
GGCATCTGCTGTGGCAGAACCTTCTTTTTACTCTCAGCATCCCTGGCTTGAAGGCAGA  
TTTGTAGATTTCTAGGAAGCT

>1003

GTGAATTAGGCATCTGCTGTGGCAGAACCTTCTTTTTACTCTCAGCATCCCTGGCTTGA  
AAGGCAGATTTGTAGATTTCTAGGAAGCTACTTCAATTAATCTCTAAGATCCTCTTGC  
TAAGGGCTTGGCAACAGGGAG

>1004

AGGAAGCTACTTCAATTAATCTCTAAGATCCTCTTGCTAAGGGCTTGGCAACAGGG  
AGGAGGGGGCATGTTGTAGTGGTTGAATTCTTACTTTTAGGGACACTGATGAATTTGTC  
TTTTGTTCTCTCATCTCTTTTGC

>1005

AAGCTACTTCAATTAATCTCTAAGATCCTCTTGCTAAGGGCTTGGCAACAGGGAGG  
AGGGGGCATGTTGTAGTGGTTGAATTCTTACTTTTAGGGACACTGATGAATTTGCTTTT  
GTTCTCTCATCTCTTTTGCTTC

>1006

GCTTGGCAACAGGGAGGAGGGGGCATGTTGTAGTGGTTGAATTCTTACTTTTAGGGAC  
ACTGATGAATTTGTCTTTTGTCTCTCATCTCTTTTGCTTCTTCCCCTCTTTTCTCCTA  
GCCTCCTCTATTGGCCCAGGA

>1007

AACAGGGAGGAGGGGGCATGTTGTAGTGGTTGAATTCTTACTTTTAGGGACACTGATG  
AATTTGTCTTTTGTCTCTCATCTCTTTTGCTTCTTCCCCTCTTTTCTCCTAGCCTCCT  
CTATTGGCCCAGGAAGCCCAC

>1008

GGAGCACCATGGATCTGACAAAAATGGGCATGATCCAGCTGCAGAACCCTAGCCACCC  
CACGGGGCTACTGTGCAAGGCCAACAGATGCGGCTGGCCGGGACTTTGTGCGATGTG  
GTCATCATGGTGGACAGCCAGGAG

>1009

AGCTGCAGAACCCTAGCCACCCACGGGGCTACTGTGCAAGGCCAACAGATGCGGC

TGGCCGGGACTTTGTGCGATGTGGTCATCATGGTGGACAGCCAGGAGTTCCACGCCCA  
CCGGACGGTGCTGGCCTGCACCAGC

>1010

GAACCCTAGCCACCCACGGGGCTACTGTGCAAGGCCAACCAGATGCGGCTGGCCGG  
GACTTTGTGCGATGTGGTCATCATGGTGGACAGCCAGGAGTTCCACGCCACCGGACG  
GTGCTGGCCTGCACCAGCAAGATGT

>1011

CCCCACGGGGCTACTGTGCAAGGCCAACCAGATGCGGCTGGCCGGGACTTTGTGCGAT  
GTGGTCATCATGGTGGACAGCCAGGAGTTCCACGCCACCGGACGGTGCTGGCCTGC  
ACCAGCAAGATGTTTGAGATCCTCT

>1012

GCGGCTGGCCGGGACTTTGTGCGATGTGGTCATCATGGTGGACAGCCAGGAGTTCCAC  
GCCACCGGACGGTGCTGGCCTGCACCAGCAAGATGTTTGAGATCCTCTTCCACCGCA  
ATAGTCAAACTATACTTTGGACT

>1013

ATGTGGTCATCATGGTGGACAGCCAGGAGTTCCACGCCACCGGACGGTGCTGGCCTG  
CACCAGCAAGATGTTTGAGATCCTCTTCCACCGCAATAGTCAAACTATACTTTGGACT  
TCCTCTGCCAAAGACCTTCCAG

>1014

GAGTTCCACGCCACCGGACGGTGCTGGCCTGCACCAGCAAGATGTTTGAGATCCTCT  
TCCACCGCAATAGTCAAACTATACTTTGGACTTCTCTGCCAAAGACCTTCCAGCAG  
ATTCTGGAGTATGCATATACAGC

>1015

TCTTCCACCGCAATAGTCAAACTATACTTTGGACTTCTCTGCCAAAGACCTTCCAG  
CAGATTCTGGAGTATGCATATACAGCCACGCTGCAAGCCAAGGCGGAGGACCTGGATG  
ACCTGCTGTATGCGGCCGAGATC

>1016

TCCAGCAGATTCTGGAGTATGCATATACAGCCACGCTGCAAGCCAAGGCGGAGGACCT  
GGATGACCTGCTGTATGCGGCCGAGATCCTGGAGATCGAGTACCTGGAGGAACAGTGC  
CTGAAGATGCTGGAGACCATCCAG

>1017

CAGCCACGCTGCAAGCCAAGGCGGAGGACCTGGATGACCTGCTGTATGCGGCCGAGA  
TCCTGGAGATCGAGTACCTGGAGGAACAGTGCCTGAAGATGCTGGAGACCATCCAGG  
CCTCAGACGACAATGACACGGAGGCC

>1018

CCAAGGCGGAGGACCTGGATGACCTGCTGTATGCGGCCGAGATCCTGGAGATCGAGTA  
CCTGGAGGAACAGTGCCTGAAGATGCTGGAGACCATCCAGGCTCAGACGACAATGA  
CACGGAGGCCACCATGGCCGATGGC

>1019

GAGGAAGAAGAGGACCGCAAGGCTCGGTACCTCAAGAACATCTTCATCTCGAAGCAT  
TCCAGCGAGGAGAGTGGGTATGCCAGTGTGGCTGGACAGAGCCTCCCTGGGCCCATG  
GTGGACCAGAGCCCTCAGTCTCCAC

>1020

AAGAAGAGGACCGCAAGGCTCGGTACCTCAAGAACATCTTCATCTCGAAGCATTCCAG  
CGAGGAGAGTGGGTATGCCAGTGTGGCTGGACAGAGCCTCCCTGGGCCCATGGTGA  
CCAGAGCCCTCAGTCTCCACTTCA

>1021

CATCTCGAAGCATTCCAGCGAGGAGAGTGGGTATGCCAGTGTGGCTGGACAGAGCCTC  
CCTGGGCCCATGGTGGACCAGAGCCCTTCAGTCTCCACTTCATTTGGTCTTTCAGCCAT  
GAGTCCCACCAAGGCTGCAGTGG

>1022

CGAGGAGAGTGGGTATGCCAGTGTGGCTGGACAGAGCCTCCCTGGGCCCATGGTGGGA  
CCAGAGCCCTTCAGTCTCCACTTCATTTGGTCTTTCAGCCATGAGTCCCACCAAGGCTG  
CAGTGGACAGTTTGATGACCATAG

>1023

GCCAGTGTGGCTGGACAGAGCCTCCCTGGGCCCATGGTGGACCAGAGCCCTTCAGTCT  
CCACTTCATTTGGTCTTTCAGCCATGAGTCCCACCAAGGCTGCAGTGGACAGTTTGATG  
ACCATAGGACAGTCTCTCCTGCA

>1024

CAGAGCCTCCCTGGGCCCATGGTGGACCAGAGCCCTTCAGTCTCCACTTCATTTGGTC  
TTTCAGCCATGAGTCCCACCAAGGCTGCAGTGGACAGTTTGATGACCATAGGACAGTC  
TCTCCTGCAGGGAAGTCTTCAGCC

>1025

CATGGTGGACCAGAGCCCTTCAGTCTCCACTTCATTTGGTCTTTCAGCCATGAGTCCCA  
CCAAGGCTGCAGTGGACAGTTTGATGACCATAGGACAGTCTCTCCTGCAGGGAAGTCT  
TCAGCCACCTGCAGGGCCCGAGG

>1026

ATAGGACAGTCTCTCCTGCAGGGAAGTCTTCAGCCACCTGCAGGGCCCGAGGAGCCA  
ACTCTGGCTGGGGTGGGCGGCACCCTGGGGTGGCTGAGGTGAAGACGGAGATGATG  
CAGGTGGATGAGGTGCCAGCCAGGA

>1027

GCAGGGAAGTCTTCAGCCACCTGCAGGGCCCGAGGAGCCAAGTCTGGCTGGGGGTGG  
GCGGCACCCTGGGGTGGCTGAGGTGAAGACGGAGATGATGCAGGTGGATGAGGTGCC  
CAGCCAGGACAGCCCTGGGGCAGCCG

>1028

TCTTCAGCCACCTGCAGGGCCCGAGGAGCCAAGTCTGGCTGGGGGTGGGCGGCACCC  
TGGGGTGGCTGAGGTGAAGACGGAGATGATGCAGGTGGATGAGGTGCCAGCCAGGA  
CAGCCCTGGGGCAGCCGAGTCCAGCA

>1029

AACTCTGGCTGGGGGTGGGCGGCACCCTGGGGTGGCTGAGGTGAAGACGGAGATGAT  
GCAGGTGGATGAGGTGCCAGCCAGGACAGCCCTGGGGCAGCCGAGTCCAGCATCTC  
AGGAGGGATGGGGGACAAGGTTGAGG

>1030

TGGCTGAGGTGAAGACGGAGATGATGCAGGTGGATGAGGTGCCAGCCAGGACAGCC  
CTGGGGCAGCCGAGTCCAGCATCTCAGGAGGGATGGGGGACAAGGTTGAGGAAAGA  
GGCAAAGAGGGGCCTGGGACCCCGACT

>1031

GGATGAGGTGCCAGCCAGGACAGCCCTGGGGCAGCCGAGTCCAGCATCTCAGGAGG  
GATGGGGGACAAGGTTGAGGAAAGAGGCAAAGAGGGGCCTGGGACCCCGACTCGAA  
GCAGCGTCATCACCAGTGCTAGGGAGC

>1032

CTCAGGAGGGATGGGGGACAAGGTTGAGGAAAGAGGCAAAGAGGGGCCTGGGACCC

CGACTCGAAGCAGCGTCATCACCAGTGCTAGGGAGCTACACTATGGGCGAGAGGAGA  
GTGCCGAGCAGGTGCCACCCCAGCTG

>1033

ATGGGGGACAAGGTTGAGGAAAGAGGCCAAAGAGGGGCCTGGGACCCCGACTCGAAG  
CAGCGTCATCACCAGTGCTAGGGAGCTACACTATGGGCGAGAGGAGAGTGCCGAGCA  
GGTGCCACCCCAGCTGAGGCTGGCCA

>1034

GGGCCTGGGACCCCGACTCGAAGCAGCGTCATCACCAGTGCTAGGGAGCTACACTATG  
GGCGAGAGGAGAGTGCCGAGCAGGTGCCACCCCAGCTGAGGCTGGCCAGGCCCCC  
ACTGGCCGACCTGAGCACCCAGCACC

>1035

CCCGACTCGAAGCAGCGTCATCACCAGTGCTAGGGAGCTACACTATGGGCGAGAGGA  
GAGTGCCGAGCAGGTGCCACCCCAGCTGAGGCTGGCCAGGCCCCCACTGGCCGACC  
TGAGCACCCAGCACCCCGCTGAGA

>1036

TGGCCAGGCCCCCACTGGCCGACCTGAGCACCCAGCACCCCGCTGAGAAGCATCT  
GGGCATCTACTCCGTGTTGCCCAACCACAAGGCTGACGCTGTATTGAGCATGCCGTCTT  
CCGTGACCTCTGGCCTCCACGTGC

>1037

GCCAGGCCCCCACTGGCCGACCTGAGCACCCAGCACCCCGCTGAGAAGCATCTGG  
GCATCTACTCCGTGTTGCCCAACCACAAGGCTGACGCTGTATTGAGCATGCCGTCTTCC  
GTGACCTCTGGCCTCCACGTGCAG

>1038

GCACCCAGCACCCCGCTGAGAAGCATCTGGGCATCTACTCCGTGTTGCCCAACCAC  
AAGGCTGACGCTGTATTGAGCATGCCGTCTCCGTGACCTCTGGCCTCCACGTGCAGC  
CTGCCCTGGCTGTCTCCATGGACT

>1039

GAAGCATCTGGGCATCTACTCCGTGTTGCCCAACCACAAGGCTGACGCTGTATTGAGC  
ATGCCGTCTTCCGTGACCTCTGGCCTCCACGTGCAGCCTGCCCTGGCTGTCTCCATGGA  
CTTCAGCACCTATGGGGGGCTGC

>1040

CTCCGTGTTGCCCAACCACAAGGCTGACGCTGTATTGAGCATGCCGTCTTCCGTGACCT  
CTGGCCTCCACGTGCAGCCTGCCCTGGCTGTCTCCATGGACTTCAGCACCTATGGGGG  
GCTGCTGCCCCAGGGCTTCATCC

>1041

CAAGGCTGACGCTGTATTGAGCATGCCGTCTTCCGTGACCTCTGGCCTCCACGTGCAG  
CCTGCCCTGGCTGTCTCCATGGACTTCAGCACCTATGGGGGGCTGCTGCCCCAGGGCT  
TCATCCAGAGGGAGCTGTTAGCA

>1042

CCCTGGCTGTCTCCATGGACTTCAGCACCTATGGGGGGCTGCTGCCCCAGGGCTTCATC  
CAGAGGGAGCTGTTAGCAAGCTGGGGGAGCTGGCTGTGGGCATGAAGTCAGAGAGC  
CGGACCATCGAGAGCAGTGCAGC

>1043

CACCTATGGGGGGCTGCTGCCCCAGGGCTTCATCCAGAGGGAGCTGTTAGCAAGCTG  
GGGGAGCTGGCTGTGGGCATGAAGTCAGAGAGCCGGACCATCGGAGAGCAGTGCAGC  
GTGTGTGGGGTTCAGCTTCCTGATA

>1044

GGCTGCTGCCCCAGGGCTTCATCCAGAGGGAGCTGTTAGCAAGCTGGGGGAGCTGG  
CTGTGGGCATGAAGTCAGAGAGCCGGACCATCGGAGAGCAGTGCAGCGTGTGTGGGG  
TCGAGCTTCTGATAACGAGGCTGTG

>1045

GGGAGCTGTTAGCAAGCTGGGGGAGCTGGCTGTGGGCATGAAGTCAGAGAGCCGGA  
CCATCGGAGAGCAGTGCAGCGTGTGTGGGGTCGAGCTTCTGATAACGAGGCTGTGG  
AGCAGCACAGGTAGGCCCGCTCCAG

>1046

GAAGTCAGAGAGCCGGACCATCGGAGAGCAGTGCAGCGTGTGTGGGGTCGAGCTTCC  
TGATAACGAGGCTGTGGAGCAGCACAGGTAGGCCCGCTCCAGCCCCGCACCTGATGT  
AGGACTTGAGGCCCTCACACCCCTC

>1047

GGGGTCGAGCTTCTGATAACGAGGCTGTGGAGCAGCACAGGTAGGCCCGCTCCAG  
CCCCGCACCTGATGTAGGACTTGAGGCCCTCACACCCCTCCTTCACACCTGGCTGCT  
CCCAAGTTAGGGCCTGGCTCCCCT

>1048

GCTCCAGCCCCGCACCTGATGTAGGACTTGAGGCCCTCACACCCCTCCTTCACACCT  
GGCTGCTCCCAAGTTAGGGCCTGGCTCCCCTGTCTTGGAATTTGTGAAAAAACAG  
AACACTTCTTCTAAAGTTCTGGCG

>1049

GTAGGACTTGAGGCCCTCACACCCCTCCTTCACACCTGGCTGCTCCCAAGTTAGGGG  
CCTGGCTCCCCTGTCTTGGAATTTGTGAAAAAACAGAACACTTCTTCTAAAGTTCTG  
GCGGGGAGGGGAGCAGGTTTTTT

>1050

CCCTCACACCCCTCCTTCACACCCCTGGCTGCTCCCAAGTTAGGGCCTGGCTCCCCTGT  
CTTGGAATTTGTGAAAAAACAGAACACTTCTTCTAAAGTTCTGGCGGGGAGGGGA  
GCAGGTTTTTTAAAGTGTAGTGAG

>1051

TGCTCCCAAGTTAGGGCCTGGCTCCCCTGTCTTGGAATTTGTGAAAAAACAGAAC  
ACTTCTTCTAAAGTTCTGGCGGGGAGGGGAGCAGGTTTTTTAAAGTGTAGTGAGGGGG  
CCTAGGATCTTTCCAAAAAGCACC

>1052

CTCCCCTGTCTTGGAATTTGTGAAAAAACAGAACACTTCTTCTAAAGTTCTGGCGG  
GGAGGGGAGCAGGTTTTTTAAAGTGTAGTGAGGGGGCCTAGGATCTTTCCAAAAAGC  
ACCAGGGGACACTCATGGGCGCAGC

>1053

TTGGCAATTTGTGAAAAAACAGAACACTTCTTCTAAAGTTCTGGCGGGGAGGGGAG  
CAGGTTTTTTAAAGTGTAGTGAGGGGGCCTAGGATCTTTCCAAAAAGCACCAGGGGAC  
ACTCATGGGCGCAGCTTCTTAATAG

>1054

GGCCTAGGATCTTTCCAAAAAGCACCAGGGGACACTCATGGGCGCAGCTTCTTAATAG  
GCCCTTCCCTTTGTTTTTTGCTTTGGGCCCTGTTGTTTTTTCTGCTGTTTGGTCTGTT  
CTCCTTTGCTTGGAGTACTG

>1055

GCACCAGGGGACACTCATGGGCGCAGCTTCTTAATAGGCCCTTCCCTTTGTTTTTTGCT



TTTGGGCCCTGTTTGTCTCTGCTGTTGGTCTGTTCTCCTTGCTTGGAGTGACTG  
ATAAAATGGAGAGAAGGAGAA

>1056

CAGGGGACACTCATGGGCGCAGCTTCTTAATAGGCCCTCCCTTTGTTTTTGCTTTG  
GGCCCTGTTTGTCTCTGCTGTTGGTCTGTTCTCCTTGCTTGGAGTGACTGATAA  
AATGGAGAGAAGGAGAAAAGG

>1057

ATGGGCGCAGCTTCTTAATAGGCCCTCCCTTTGTTTTTGCTTTGGGCCCTGTTGT  
TTTTTCTGCTGTTTGGTCTGTTCTCCTTGCTTGGAGTGACTGATAAAATGGAGAGAAG  
GAGAAAAGGAGTGGGATGAGG

>1058

TTTTTCTGCTGTTTGGTCTGTTCTCCTTGCTTGGAGTGACTGATAAAATGGAGAGAA  
GGAGAAAAGGAGTGGGATGAGGGTCTTGGGCCCTGCATCTGACCATGTTACTAGGT  
TTCAGGTCCTCGGGTCCCATGC

>1059

GTTTGGTCTGTTCTCCTTGCTTGGAGTGACTGATAAAATGGAGAGAAGGAGAAAAGG  
AGTGGGATGAGGGTCTTGGGCCCTGCATCTGACCATGTTACTAGGTTTCAGGTCCTC  
GGGTTCCCATGCAGTGGTCCCTG

>1060

GTGACTGATAAAATGGAGAGAAGGAGAAAAGGAGTGGGATGAGGGTCTTGGGCC  
TGCATCTGACCATGTTACTAGGTTTCAGGTCCTCGGGTCCCATGCAGTGGTCCCTGTG  
AAGACAGCCTGTCCTTTCTGCAG

>1061

TAAATGGAGAGAAGGAGAAAAGGAGTGGGATGAGGGTCTTGGGCCCTGCATCTG  
ACCATGTTACTAGGTTTCAGGTCCTCGGGTCCCATGCAGTGGTCCCTGTGAAGACAG  
CCTGTCCCTTTCTGCAGCTTGGGAG

>1062

GAGAGAAGGAGAAAAGGAGTGGGATGAGGGTCTTGGGCCCTGCATCTGACCATGT  
TACTAGGTTTCAGGTCCTCGGGTCCCATGCAGTGGTCCCTGTGAAGACAGCCTGTCC  
CTTCTGCAGCTTGGGAGAATGGGA

>1063

TGGGATGAGGGTCTTGGGCCCTGCATCTGACCATGTTACTAGGTTTCAGGTCCTCGG  
GTTCCCATGCAGTGGTCCCTGTGAAGACAGCCTGTCCTTTCTGCAGCTTGGGAGAAT  
GGGAGGGTCTGGGGGCTGCTTAA

>1064

CCTCGGGTCCCATGCAGTGGTCCCTGTGAAGACAGCCTGTCCTTTCTGCAGCTTGG  
GAGAATGGGAGGGTCTGGGGGCTGCTTAAGCCACAAGAGCAGCTGCAGGTTCTGAAC  
CTTATTCTGGTAAAAGTTAATCTC

>1065

CCTGTCCCTTTCTGCAGCTTGGGAGAATGGGAGGGTCTGGGGGCTGCTTAAGCCACAA  
GAGCAGCTGCAGGTTCTGAACCTTATTCTGGTAAAAGTTAATCTCCTTGCTCTGTCTC  
CCTTCTATTCTCTGATCCTGCA

>1066

TGGGAGAATGGGAGGGTCTGGGGGCTGCTTAAGCCACAAGAGCAGCTGCAGGTTCTG  
AACCTTATTCTGGTAAAAGTTAATCTCCTTGCTCTGTCTCCCTTCTATTCTCTGATCC  
TGCACATGCATTTAGGGGAATT

>1067

GCTGCTTAAGCCACAAGAGCAGCTGCAGGTTCTGAACCTTATTCTGGTGAAAGTTAA  
TCTCCTTGCTCTGTCTCCCTTCTCATTCTCTGATCCTGCACATGCATTTAGGGGGAATTG  
ATTTAAATGCAAGGGGAAAGGA

>1068

TCCCTTCTCATTCTCTGATCCTGCACATGCATTTAGGGGGAATTGATTTAAATGCAAGGG  
GAAAGGATGGGTATAAGAGTCTTGGTCTTGCAGCCTGTGAAGTCTCATTCTTATCCCAT  
CTCTGCTCACACTGAACTAAA

>1069

CATTCTCTGATCCTGCACATGCATTTAGGGGGAATTGATTTAAATGCAAGGGGAAAGGA  
TGGGTATAAGAGTCTTGGTCTTGCAGCCTGTGAAGTCTCATTCTTATCCCATCTCTGCTC  
ACACTGAACTAAATGCCGCTT

>1070

CTGATCCTGCACATGCATTTAGGGGGAATTGATTTAAATGCAAGGGGAAAGGATGGGTA  
TAAGAGTCTTGGTCTTGCAGCCTGTGAAGTCTCATTCTTATCCCATCTCTGCTCACACT  
GAACTAAATGCCGCTTCAGGCT

>1071

ATGCATTTAGGGGGAATTGATTTAAATGCAAGGGGAAAGGATGGGTATAAGAGTCTTG  
GTCTTGCAGCCTGTGAAGTCTCATTCTTATCCCATCTCTGCTCACACTGAACTAAATGC  
CGCTTCAGGCTAGCATTGGCTTC

>1072

TCTTATCCCATCTCTGCTCACACTGAACTAAATGCCGCTTCAGGCTAGCATTGGCTTCCC  
TCCGGCTTCCGTTTCCTTCTCTATGAAATAACCATTTCATTGAGCTTATGACATGTTTG  
GTTTCAGTACTAAGCACTTC

>1073

TAGCATTGGCTTCCCTCCGGCTTCCGTTTCCTTCTCTATGAAATAACCATTTCATTGAGCT  
CTTATGACATGTTTGGTTTCAGTACTAAGCACTTTCATGAGTTGCATTTTCATTACAACA  
GCCCTTTGAGATAGGTAATG

>1074

TTGGCTTCCCTCCGGCTTCCGTTTCCTTCTCTATGAAATAACCATTTCATTGAGCTTAT  
GACATGTTTGGTTTCAGTACTAAGCACTTTCATGAGTTGCATTTTCATTACAACAGCCCT  
TTGAGATAGGTAATGTCCTT

>1075

CTTCTCTATGAAATAACCATTTCATTGAGCTTATGACATGTTTGGTTTCAGTACTAAGCA  
CTTTCATGAGTTGCATTTTCATTACAACAGCCCTTTGAGATAGGTAATGTCCTTCTTTT  
TTTTTTGGATGTGAAGTTTC

>1076

TGACATGTTTGGTTTCAGTACTAAGCACTTTCATGAGTTGCATTTTCATTACAACAGCCC  
TTTGAGATAGGTAATGTCCTTCTTTTTTTTTTTGGATGTGAAGTTTCGCTCTCCTTGCCCA  
GGCTGGAGTGCAATGGTGTG

>1077

TGTTTGGTTTCAGTACTAAGCACTTTCATGAGTTGCATTTTCATTACAACAGCCCTTTGA  
GATAGGTAATGTCCTTCTTTTTTTTTTTGGATGTGAAGTTTCGCTCTCCTTGCCCAGGCTG  
GAGTGCAATGGTGTGATCTC

>1078

CTTTCATGAGTTGCATTTTCATTACAACAGCCCTTTGAGATAGGTAATGTCCTTCTTTT

TTTTTTGGATGTGAAGTTTCGCTCTCCTTGCCCAGGCTGGAGTGCAATGGTGTGATCTC  
TGCTCACCGCAACCTCTGCAT

>1079

CATGAGTTGCATTTTCATTACAACAGCCCTTTGAGATAGGTAATGCCTTCTTTTTTTTTT  
GGATGTGAAGTTTCGCTCTCCTTGCCCAGGCTGGAGTGCAATGGTGTGATCTCTGCTCA  
CCGCAACCTCTGCATCCCGG

>1080

CCCTTTGAGATAGGTAATGCCTTCTTTTTTTTTTTGGATGTGAAGTTTCGCTCTCCTTGC  
CCAGGCTGGAGTGCAATGGTGTGATCTCTGCTCACCGCAACCTCTGCATCCCGGGTTA  
AGGTGATTCTCCTGCCTCAGCC

>1081

GTTTCGCTCTCCTTGCCCAGGCTGGAGTGCAATGGTGTGATCTCTGCTCACCGCAACCT  
CTGCATCCCGGGTTAAGGTGATTCTCCTGCCTCAGCCTCCCGAGTAGCTCGGATTACAG  
GCACGCACCACCATACCTGGCT

>1082

CTCTCCTTGCCCAGGCTGGAGTGCAATGGTGTGATCTCTGCTCACCGCAACCTCTGCAT  
CCCGGGTTAAGGTGATTCTCCTGCCTCAGCCTCCCGAGTAGCTCGGATTACAGGCACG  
CACCACCATACCTGGCTAATTTT

>1083

TGGTGTGATCTCTGCTCACCGCAACCTCTGCATCCCGGGTTAAGGTGATTCTCCTGCCT  
CAGCCTCCCGAGTAGCTCGGATTACAGGCACGCACCACCATACCTGGCTAATTTTGAAT  
TTTTAGTAGAGACGGGCTTTCA

>1084

CTGCCCTCAGCCTCCCGAGTAGCTCGGATTACAGGCACGCACCACCATACCTGGCTAATT  
TTGAATTTTTAGTAGAGACGGGCTTTACCGTGTTGGTCAGGATGGTCTCGAACTCCCG  
ACCTCAGGTGATCGGCCTGCTT

>1085

AGCTCGGATTACAGGCACGCACCACCATACCTGGCTAATTTTGAATTTTTAGTAGAGAC  
GGGCTTTACCGTGTTGGTCAGGATGGTCTCGAACTCCCGACCTCAGGTGATCGGCCT  
GCTTCGGCCTCCCAAAGTGCTGG

>1086

CTCGGATTACAGGCACGCACCACCATACCTGGCTAATTTTGAATTTTTAGTAGAGACGG  
GCTTTACCGTGTTGGTCAGGATGGTCTCGAACTCCCGACCTCAGGTGATCGGCCTGC  
TTCGGCCTCCCAAAGTGCTGGAT

>1087

GATTACAGGCACGCACCACCATACCTGGCTAATTTTGAATTTTTAGTAGAGACGGGCTT  
TCACCGTGTTGGTCAGGATGGTCTCGAACTCCCGACCTCAGGTGATCGGCCTGCTTCG  
GCCTCCCAAAGTGCTGGATTACA

>1088

CACGCACCACCATACCTGGCTAATTTTGAATTTTTAGTAGAGACGGGCTTTACCGTGT  
TGGTCAGGATGGTCTCGAACTCCCGACCTCAGGTGATCGGCCTGCTTCGGCCTCCCAA  
AGTGCTGGATTACAGGTATGAGC

>1089

AATTTTGAATTTTTAGTAGAGACGGGCTTTACCGTGTTGGTCAGGATGGTCTCGAACT  
CCCGACCTCAGGTGATCGGCCTGCTTCGGCCTCCCAAAGTGCTGGATTACAGGTATGA  
GCCACCGTGCCAGCTGGTAATG

>1090

TTTCACCGTGTGGTCAGGATGGTCTCGAACTCCCGACCTCAGGTGATCGGCCTGCTTC  
GGCCTCCCAAAGTGCTGGATTACAGGTATGAGCCACCGTGCCAGCTGGTAATGTCCTT  
CTTTTACATGGAACAATACTAA

>1091

TCAGGATGGTCTCGAACTCCCGACCTCAGGTGATCGGCCTGCTTCGGCCTCCCAAAGT  
GCTGGATTACAGGTATGAGCCACCGTGCCAGCTGGTAATGTCCTTCTTTTACATGGAA  
CAATACTAAGGCTCAGATGTCAA

>1092

CGAACTCCCGACCTCAGGTGATCGGCCTGCTTCGGCCTCCCAAAGTGCTGGATTACAG  
GTATGAGCCACCGTGCCAGCTGGTAATGTCCTTCTTTTACATGGAACAATACTAAGGC  
TCAGATGTCAAGTCTCTTTTCTA

>1093

TACAGGTATGAGCCACCGTGCCAGCTGGTAATGTCCTTCTTTTACATGGAACAATACT  
AAGGCTCAGATGTCAAGTCTCTTTTCTAGGGTCACATAGATAGTAAGAGGCAGAGCTG  
GATTCAAATTTAGGTCCTTACCC

>1094

GTATGAGCCACCGTGCCAGCTGGTAATGTCCTTCTTTTACATGGAACAATACTAAGGC  
TCAGATGTCAAGTCTCTTTTCTAGGGTCACATAGATAGTAAGAGGCAGAGCTGGATTCA  
AATTTAGGTCCTTACCCCCTGG

>1095

ATGTCCTTCTTTTACATGGAACAATACTAAGGCTCAGATGTCAAGTCTCTTTTCTAGGGT  
CACATAGATAGTAAGAGGCAGAGCTGGATTCAAATTTAGGTCCTTACCCCCTGGTACTT  
TGCTGCCTCTTGGAGTCACTT

>1096

AGGCTCAGATGTCAAGTCTCTTTTCTAGGGTCACATAGATAGTAAGAGGCAGAGCTGG  
ATTCAAATTTAGGTCCTTACCCCCTGGTACTTTGCTGCCTCTTGGAGTCACTTAGACTTG  
AAGAGGATCATGTCTATGGAAC

>1097

AGTCTCTTTTCTAGGGTCACATAGATAGTAAGAGGCAGAGCTGGATTCAAATTTAGGTC  
CTTACCCCCTGGTACTTTGCTGCCTCTTGGAGTCACTTAGACTTGAAGAGGATCATGTC  
TATGGAACAGAGCGTTTTGAAG

>1098

TTCAAATTTAGGTCCTTACCCCCTGGTACTTTGCTGCCTCTTGGAGTCACTTAGACTTG  
AAGAGGATCATGTCTATGGAACAGAGCGTTTTGAAGATTGCTTATAGGAAGTGGAGTA  
AATAACAGGGGGGATAAGTAGCG

>1099

TACCCCCTGGTACTTTGCTGCCTCTTGGAGTCACTTAGACTTGAAGAGGATCATGTCTA  
TGGAACAGAGCGTTTTGAAGATTGCTTATAGGAAGTGGAGTAAATAACAGGGGGGATA  
AGTAGCGAGTTTGTTTTTTTTTT

>1100

CTTGGAGTCACTTAGACTTGAAGAGGATCATGTCTATGGAACAGAGCGTTTTGAAGAT  
TGCTTATAGGAAGTGGAGTAAATAACAGGGGGGATAAGTAGCGAGTTTGTTTTTTTTTT  
CCTTGCTTCTGTCATAAACACG

>1101

AGTCACTTAGACTTGAAGAGGATCATGTCTATGGAACAGAGCGTTTTGAAGATTGCTTA

TAGGAAGTGGAGTAAATAACAGGGGGGATAAGTAGCGAGTTGTTTTTTTTTTCCTTGC  
TTCTGTCATAAACCACGTGCC

>1102

GATCATGTCTATGGAACAGAGCGTTTTGAAGATTGCTTATAGGAAGTGGAGTAAATAAC  
AGGGGGGATAAGTAGCGAGTTGTTTTTTTTTTCCTTGCCTTCTGTCATAAACCACGTGC  
CCATCATTTTATCCTCTAGTTT

>1103

AGTGGAGTAAATAACAGGGGGGATAAGTAGCGAGTTGTTTTTTTTTTCCTTGCCTTCTG  
TCATAAACCACGTGCCCATCATTTTATCCTCTAGTTTCTGGGTCAGATGAATGGAGTCAA  
GAAATCCAGCTTTCTGTTGTC

>1104

ATAAGTAGCGAGTTTGTTTTTTTTTTTCCTTGCCTTCTGTCATAAACCACGTGCCCATCATT  
TTATCCTCTAGTTTCTGGGTCAGATGAATGGAGTCAAGAAATCCAGCTTTCTGTTGTCA  
TTGACGACAGCATTGGCTGC

>1105

TTTTCTTGCCTTCTGTCATAAACCACGTGCCCATCATTTTATCCTCTAGTTTCTGGGTCA  
GATGAATGGAGTCAAGAAATCCAGCTTTCTGTTGTCATTGACGACAGCATTGGCTGCA  
TACCCTGTGGTCTGCTGTTTT

>1106

AACCACGTGCCCATCATTTTATCCTCTAGTTTCTGGGTCAGATGAATGGAGTCAAGAAA  
TCCAGCTTTCTGTTGTCATTGACGACAGCATTGGCTGCATACCCTGTGGTCTGCTGTTT  
TGCTGATCTGGGTGGATTCT

>1107

CACGTGCCCATCATTTTATCCTCTAGTTTCTGGGTCAGATGAATGGAGTCAAGAAATCC  
AGCTTTCTGTTGTCATTGACGACAGCATTGGCTGCATACCCTGTGGTCTGCTGTTTTG  
CTGATCTTGGGTGGATTCTCCA

>1108

GGTCAGATGAATGGAGTCAAGAAATCCAGCTTTCTGTTGTCATTGACGACAGCATTG  
GCTGCATACCCTGTGGTCTGCTGTTTTGCTGATCTGGGTGGATTCTCCACTTCCCTCCC  
CTTACCCCCATTCCCCTGTTG

>1109

ATGGAGTCAAGAAATCCAGCTTTCTGTTGTCATTGACGACAGCATTGGCTGCATACC  
TGTGGTCTGCTGTTTTGCTGATCTTGGGTGGATTCTCCACTTCCCTCCCCCTCACCCCA  
TTCCCCTGTTGCTCGTTCAGG

>1110

CAGCTTTCTGTTGTCATTGACGACAGCATTGGCTGCATACCCTGTGGTCTGCTGTTTT  
GCTGATCTTGGGTGGATTCTCCACTTCCCTCCCCCTCACCCCCATTCCCCTGTTGCTCGT  
TCAGGTACGGGGGATGTGAGT

>1111

CCCTGTGGTCTGCTGTTTTGCTGATCTTGGGTGGATTCTCCACTTCCCTCCCCCTCACCC  
CCATTCCCCTGTTGCTCGTTACGGTACGGGGGATGTGAGTGAGAGGGGTTGGGGTGGG  
GATATCTGGAAGTTGATCTCAT

>1112

GTCTGCTGTTTTGCTGATCTTGGGTGGATTCTCCACTTCCCTCCCCCTCACCCCCATTCC  
CCTGTTGCTCGTTACGGTACGGGGGATGTGAGTGAGAGGGGTTGGGGTGGGGATATCT  
GGAAGTTGATCTCATCCCCCT

>1113

TGTTTTGCTGATCTTGGGTGGATTCTCCACTTCTCCCCCTCACCCCCATTCCCCTGTT  
GCTCGTTCAGGTACGGGGGATGTGAGTGAGAGGGGTTGGGGTGGGGATATCTGGAAG  
TTGATCTCATACCCCTAGCCGG

>1114

TCTTGGGTGGATTCTCCACTTCTCCCCCTCACCCCCATTCCCCTGTTGCTCGTTCAGG  
TACGGGGGATGTGAGTGAGAGGGGTTGGGGTGGGGATATCTGGAAGTTGATCTCATCA  
CCCCTAGCCGGAATCTGCTCTG

>1115

TTCCTCCCCCTCACCCCCATTCCCCTGTTGCTCGTTCAGGTACGGGGGATGTGAGTGA  
GAGGGGTTGGGGTGGGGATATCTGGAAGTTGATCTCATACCCCTAGCCGGAATCTGC  
TCTGACCCTGCCTCCTCGACAGC

>1116

AGTTGATCTCATACCCCTAGCCGGAATCTGCTCTGACCCTGCCTCCTCGACAGCTCAG  
AGGCTTAACTTGTGGAAAGTGTGGCAGAGCTAAACGTAGCCGACTTTTCCAGTGGGT  
GCGAAAAATAACCGCCACTAAGG

>1117

CTCATACCCCTAGCCGGAATCTGCTCTGACCCTGCCTCCTCGACAGCTCAGAGGCTTA  
ACTTGTGGAAAGTGTGGCAGAGCTAAACGTAGCCGACTTTTCCAGTGGGTGCGAAA  
AATAACCGCCACTAAGGTGTGTCT

>1118

GAATCTGCTCTGACCCTGCCTCCTCGACAGCTCAGAGGCTTAACTTGTGGAAAGTGTG  
GCAGAGCTAAACGTAGCCGACTTTTCCAGTGGGTGCGAAAAATAACCGCCACTAAGG  
TGTGTCTTCTTGATGCTTGTACCG

>1119

CCTCGACAGCTCAGAGGCTTAACTTGTGGAAAGTGTGGCAGAGCTAAACGTAGCCGA  
CTTTTCCAGTGGGTGCGAAAAATAACCGCCACTAAGGTGTGTCTTCTTGATGCTTGTA  
CCGCTCAGAAATAGACTGAGGTTA

>1120

TGTGGAAAGTGTGGCAGAGCTAAACGTAGCCGACTTTTCCAGTGGGTGCGAAAAATA  
ACCGCCACTAAGGTGTGTCTTCTTGATGCTTGTACCGCTCAGAAATAGACTGAGGTTAT  
GTTTGTGTTTTGCTCAAACCTTCC

>1121

TGGAAAGTGTGGCAGAGCTAAACGTAGCCGACTTTTCCAGTGGGTGCGAAAAATAAC  
CGCCACTAAGGTGTGTCTTCTTGATGCTTGTACCGCTCAGAAATAGACTGAGGTTATGT  
TTGTTTTTGCTCAAACCTTCTA

>1122

CTAAACGTAGCCGACTTTTCCAGTGGGTGCGAAAAATAACCGCCACTAAGGTGTGTC  
TTCTTGATGCTTGTACCGCTCAGAAATAGACTGAGGTTATGTTTGTGTTTTGCTCAAACCT  
TCCTAAAGAGGAAACCGCTCC

>1123

TGCGAAAAATAACCGCCACTAAGGTGTGTCTTCTTGATGCTTGTACCGCTCAGAAATAG  
ACTGAGGTTATGTTTGTGTTTTGCTCAAACCTTCTAAAGAGGAAACCGCTCCCCAAA  
GTTGACCAGATAGATGTATCATC

>1124

AAAAATAACCGCCACTAAGGTGTGTCTTCTTGATGCTTGTACCGCTCAGAAATAGACTG

AGGTTATGTTTGTGTTTTGCTCAAACCTTCTAAAGAGGAAACCCGCTCCCCAAAGTTGA  
CCAGATAGATGTATCATCTTTC

>1125

GCTCAGAAATAGACTGAGGTTATGTTTGTGTTTTGCTCAAACCTTCTAAAGAGGAAACC  
CGCTCCCCAAAGTTGACCAGATAGATGTATCATCTTCCGGATGTGAATTATTCGGCTG  
TGTGCTATGAGAACTGGGTAT

>1126

GAGGTTATGTTTGTGTTTTGCTCAAACCTTCTAAAGAGGAAACCCGCTCCCCAAAGTTG  
ACCAGATAGATGTATCATCTTCCGGATGTGAATTATTCGGCTGTGTGCTATGAGAACT  
GGGTATGGTGGGAAGTAATTG

>1127

TGCTCAAACCTTCTAAAGAGGAAACCCGCTCCCCAAAGTTGACCAGATAGATGTATC  
ATCTTCCGGATGTGAATTATTCGGCTGTGTGCTATGAGAACTGGGTATGGTGGGAAG  
TAATTGTTTTCTGGCTCTCATC

>1128

AAGAGGAAACCCGCTCCCCAAAGTTGACCAGATAGATGTATCATCTTCCGGATGTGA  
ATTATTCGGCTGTGTGCTATGAGAACTGGGTATGGTGGGAAGTAATTGTTTTCTGGCT  
CTCATCAGGTCCTGGTTCCTGG

>1129

GATAGATGTATCATCTTCCGGATGTGAATTATTCGGCTGTGTGCTATGAGAACTGGGT  
ATGGTGGGAAGTAATTGTTTTCTGGCTCTCATCAGGTCCTGGTTCCTGGTTGCTTTTCT  
TTACCCGAGAGGGCCACAAA

>1130

TGTATCATCTTCCGGATGTGAATTATTCGGCTGTGTGCTATGAGAACTGGGTATGGTG  
GGAAGTAATTGTTTTCTGGCTCTCATCAGGTCCTGGTTCCTGGTTGCTTTTCTTACCC  
GAGAGGGCCACAAAAGATAC

>1131

GAATTATTCGGCTGTGTGCTATGAGAACTGGGTATGGTGGGAAGTAATTGTTTTCTG  
GCTCTCATCAGGTCCTGGTTCCTGGTTGCTTTTCTTACCCGAGAGGGCCACAAAAGAT  
ACCACTCTCCTGAGACTTCCAA

>1132

GTCCTGGTTCCTGGTTGCTTTTCTTACCCGAGAGGGCCACAAAAGATACCACTCTCCT  
GAGACTTCCAAGTCCCCTCAGCAAGACCCTCATTCTCTGGGGAGAGAGGGAGAG  
TTGGCCATGTTATTCGAAAGAG

>1133

GATACCACTCTCCTGAGACTTCCAAGTCCCCTCAGCAAGACCCTCATTCTCTGGGG  
AGAGAGGGAGAGTTGGCCATGTTATTCGAAAGAGCCTGGGTATTGGAATTGGCCATA  
TTAGTGGTGAGAGCCTGTGAT

>1134

CTCCTGAGACTTCCAAGTCCCCTCAGCAAGACCCTCATTCTCTGGGGAGAGAGGG  
AGAGTTGGCCATGTTATTCGAAAGAGCCTGGGTATTGGAATTGGCCATTTAGTGGT  
GAGAGCCTGTGATACTTATTTA

>1135

TCTGGGGAGAGAGGGAGAGTTGGCCATGTTATTCGAAAGAGCCTGGGTATTGGAAT  
TGGCCATTTAGTGGTGAGAGCCTGTGATACTTATTTAACCTTCTGGGCCTGTTTCA  
CTCACTACATTTTTTTTTTTTT

>1136

GGGGAGAGAGGGAGAGTTGGCCATGTTATATTTCGAAAGAGCCTGGGTATTGGAATTGG  
CCATATTTAGTGGTGAGAGCCTGTGATACTTATTTAACCTTTCTGGGCCTTGTTTCACTC  
ACTACATTTTTTTTTTTTTTTTTT

>1137

GCCTGGGTATTGGAATTGGCCATATTTAGTGGTGAGAGCCTGTGATACTTATTTAACCTT  
TCTGGGCCTTGTTTCACTCACTACATTTTTTTTTTTTTTTTTTTTTTTTGGAGACGGAGTCTCG  
CTCTGTCACCGGGCTGGAGT

>1138

ATACTTATTTAACCTTTCTGGGCCTTGTTTCACTCACTACATTTTTTTTTTTTTTTTTTTTTT  
GAGACGGAGTCTCGCTCTGTCACCGGGCTGGAGTGCAATGGCGTGATCTCAGCTCACT  
GCAGTCTCCACCTCCCGGGT

>1139

AACCTTTCTGGGCCTTGTTTCACTCACTACATTTTTTTTTTTTTTTTTTTTTTTGAGACGGA  
GTCTCGCTCTGTCACCGGGCTGGAGTGCAATGGCGTGATCTCAGCTCACTGCAGTCTC  
CACCTCCCGGGTTCAAGCGATT

>1140

TGTTTTCACTCACTACATTTTTTTTTTTTTTTTTTTTTTTGAGACGGAGTCTCGCTCTGTCAC  
CGGGCTGGAGTGCAATGGCGTGATCTCAGCTCACTGCAGTCTCCACCTCCCGGGTTCA  
AGCGATTCTCCTGCCTCAGCC

>1141

CACTACATTTTTTTTTTTTTTTTTTTTTTTGAGACGGAGTCTCGCTCTGTCACCGGGCTGGA  
GTGCAATGGCGTGATCTCAGCTCACTGCAGTCTCCACCTCCCGGGTTCAAGCGATTCTC  
CTGCCTCAGCCTCCTGAGTAG

>1142

TTTTTTTTGAGACGGAGTCTCGCTCTGTCACCGGGCTGGAGTGCAATGGCGTGATCTC  
AGCTCACTGCAGTCTCCACCTCCCGGGTTCAAGCGATTCTCCTGCCTCAGCCTCCTGA  
GTAGCTGGGACTACAGGCACCTG

>1143

TGGCGTGATCTCAGCTCACTGCAGTCTCCACCTCCCGGGTTCAAGCGATTCTCCTGCCT  
CAGCCTCCTGAGTAGCTGGGACTACAGGCACCTGTCACCCCGCCAGCTAATTTTTTGT  
ATTTTTAGTAGAGACAGGGTTT

>1144

AGTCTCCACCTCCCGGGTTCAAGCGATTCTCCTGCCTCAGCCTCCTGAGTAGCTGGGA  
CTACAGGCACCTGTCACCCCGCCAGCTAATTTTTTGTATTTTTAGTAGAGACAGGGTT  
TCACCATGTTGGCCAGAATGGTC

>1145

GATTCTCCTGCCTCAGCCTCCTGAGTAGCTGGGACTACAGGCACCTGTCACCCCGCCC  
AGCTAATTTTTTGTATTTTTAGTAGAGACAGGGTTTACCATGTTGGCCAGAATGGTCTC  
GATCTCTTGACCTTGCGATCCA

>1146

GCCTCAGCCTCCTGAGTAGCTGGGACTACAGGCACCTGTCACCCCGCCAGCTAATTT  
TTTGTATTTTTAGTAGAGACAGGGTTTACCATGTTGGCCAGAATGGTCTCGATCTCTTG  
ACCTTGCGATCCATCCACCTCG

>1147

GGGACTACAGGCACCTGTCACCCCGCCAGCTAATTTTTTGTATTTTTAGTAGAGACAG



GGTTTCACCATGTTGGCCAGAATGGTCTCGATCTCTTGACCTTGCATCCATCCACCTC  
GGCCTCCCAAAGTGCTGGGATT

>1148

GGTTTCACCATGTTGGCCAGAATGGTCTCGATCTCTTGACCTTGCATCCATCCACCTC  
GGCCTCCCAAAGTGCTGGGATTACAGCTGTGAGCCACCCCGCCCGCCTTCACTCACT  
TCTTAAAATGGAGACGGTCAACA

>1149

CAGAATGGTCTCGATCTCTTGACCTTGCATCCATCCACCTCGGCCTCCCAAAGTGCTG  
GGATTACAGCTGTGAGCCACCCCGCCCGCCTTCACTCACTTCTTAAAATGGAGACGG  
TCAACAGGGTTGGTGCTGAATTA

>1150

TCCCAAAGTGCTGGGATTACAGCTGTGAGCCACCCCGCCCGCCTTCACTCACTTCTT  
AAAATGGAGACGGTCAACAGGGTTGGTGCTGAATTAATGAAGTAAGATCCAGAAATCA  
CTAGAGCTGTGATGGGCACATAGT

>1151

GCTGGGATTACAGCTGTGAGCCACCCCGCCCGCCTTCACTCACTTCTTAAAATGGAG  
ACGGTCAACAGGGTTGGTGCTGAATTAATGAAGTAAGATCCAGAAATCACTAGAGCTG  
TGATGGGCACATAGTACCCGACG

>1152

CCACCCCGCCCGCCTTCACTCACTTCTTAAAATGGAGACGGTCAACAGGGTTGGTG  
TGAATTAATGAAGTAAGATCCAGAAATCACTAGAGCTGTGATGGGCACATAGTACCCG  
CAGCGGTGGAGAACTGACCATCTG

>1153

TCTTAAAATGGAGACGGTCAACAGGGTTGGTGCTGAATTAATGAAGTAAGATCCAGAA  
ATCACTAGAGCTGTGATGGGCACATAGTACCCGACGCGGTGGAGAACTGACCATCTGT  
CCCTTGTGTTGTTTAGGCCTCATC

>1154

CGGTCAACAGGGTTGGTGCTGAATTAATGAAGTAAGATCCAGAAATCACTAGAGCTGT  
GATGGGCACATAGTACCCGACGCGGTGGAGAACTGACCATCTGTCCCTTGTGTTGTT  
AGGCCTCATCTCTGCATGGTCCTC

>1155

TTGGTGCTGAATTAATGAAGTAAGATCCAGAAATCACTAGAGCTGTGATGGGCACATAG  
TACCCGACGCGGTGGAGAACTGACCATCTGTCCCTTGTGTTGTTTAGGCCTCATCTCTG  
CATGGTCCTCATTGGCTCTGAG

>1156

AGTAAGATCCAGAAATCACTAGAGCTGTGATGGGCACATAGTACCCGACGCGGTGGAG  
AACTGACCATCTGTCCCTTGTGTTGTTTAGGCCTCATCTCTGCATGGTCCTCATTGGCTC  
TGAGTTCTAGTGTGTAGTGTCC

>1157

TCCAGAAATCACTAGAGCTGTGATGGGCACATAGTACCCGACGCGGTGGAGAACTGAC  
CATCTGTCCCTTGTGTTGTTTAGGCCTCATCTCTGCATGGTCCTCATTGGCTCTGAGTTC  
TAGTGTGTAGTGTCCACAGTGC

>1158

CACATAGTACCCGACGCGGTGGAGAACTGACCATCTGTCCCTTGTGTTGTTTAGGCCTC  
ATCTCTGCATGGTCCTCATTGGCTCTGAGTTCTAGTGTGTAGTGTCCACAGTGCCACCC  
TCCATGAGGGTTGTGTTGACTG

>1159

GGTGGAGAACTGACCATCTGTCCCTTGTGTTGTTTAGGCCTCATCTCTGCATGGTCCTC  
ATTGGCTCTGAGTTCTAGTGTGTAGTGTCCACAGTGCCACCCTCCATGAGGGTTGTGTT  
GACTGTGAGGTGGTGCAGAGAA

>1160

GAACTGACCATCTGTCCCTTGTGTTGTTTAGGCCTCATCTCTGCATGGTCCTCATTGGCT  
CTGAGTTCTAGTGTGTAGTGTCCACAGTGCCACCCTCCATGAGGGTTGTGTTGACTGTG  
AGGTGGTGCAGAGAATGTCCC

>1161

CCTTGTGTTGTTTAGGCCTCATCTCTGCATGGTCCTCATTGGCTCTGAGTTCTAGTGTG  
AGTGTCCACAGTGCCACCCTCCATGAGGGTTGTGTTGACTGTGAGGTGGTGCAGAGAA  
TGCCCTGTCCCTGTGAGCATA

>1162

GGTCCTCATTGGCTCTGAGTTCTAGTGTGTAGTGTCCACAGTGCCACCCTCCATGAGGG  
TTGTGTTGACTGTGAGGTGGTGCAGAGAATGTCCCTGTCCCTGTGAGCATATGACAGC  
AAGACACTGGCCCTGGAATCCTC

>1163

TCATTGGCTCTGAGTTCTAGTGTGTAGTGTCCACAGTGCCACCCTCCATGAGGGTTGTG  
TTGACTGTGAGGTGGTGCAGAGAATGTCCCTGTCCCTGTGAGCATATGACAGCAAGAC  
ACTGGCCCTGGAATCCTCCGTGT

>1164

TTCTAGTGTGTAGTGTCCACAGTGCCACCCTCCATGAGGGTTGTGTTGACTGTGAGGT  
GGTGCAGAGAATGTCCCTGTCCCTGTGAGCATATGACAGCAAGACACTGGCCCTGGAA  
TCCTCCGTGTCACATGTGGGCTGC

>1165

TGAGGTGGTGCAGAGAATGTCCCTGTCCCTGTGAGCATATGACAGCAAGACACTGGCC  
CTGGAATCCTCCGTGTCACATGTGGGCTGCTGACAGGAAGAATGTGCTTTTGTGTTGT  
GTTGTTGTTGAGGCAGAGTCTT

>1166

AGGTGGTGCAGAGAATGTCCCTGTCCCTGTGAGCATATGACAGCAAGACACTGGCCCT  
GGAATCCTCCGTGTCACATGTGGGCTGCTGACAGGAAGAATGTGCTTTTGTGTTGTTG  
TTGTTGTTGAGGCAGAGTCTTAC

>1167

TGAGCATATGACAGCAAGACACTGGCCCTGGAATCCTCCGTGTCACATGTGGGCTGCT  
GACAGGAAGAATGTGCTTTTGTGTTGTTGTTGTTGTTGTTGAGGCAGAGTCTTACTCTGTC  
GCCAGGCTGCAGTGCAGTGGCA

>1168

GACACTGGCCCTGGAATCCTCCGTGTCACATGTGGGCTGCTGACAGGAAGAATGTGCT  
TTTGTGTTGTTGTTGTTGTTGTTGAGGCAGAGTCTTACTCTGTCGCCAGGCTGCAGTGCA  
GTGGCATGATCTTGGCTCACTGC

>1169

ACTGGCCCTGGAATCCTCCGTGTCACATGTGGGCTGCTGACAGGAAGAATGTGCTTTT  
GTTGTTGTTGTTGTTGTTGTTGAGGCAGAGTCTTACTCTGTCGCCAGGCTGCAGTGCAGT  
GGCATGATCTTGGCTCACTGCAAC

>1170

CCTCCGTGTCACATGTGGGCTGCTGACAGGAAGAATGTGCTTTTGTGTTGTTGTTGTT

GTTGAGGCAGAGTCTTACTCTGTGCGCCAGGCTGCAGTGCAGTGGCATGATCTTGGCT  
CACTGCAACCTCTACTTCCCGGG

>1171

ACATGTGGGCTGCTGACAGGAAGAATGTGCTTTTGTGTTGTTGTTGTTGTTGAGGCA  
GAGTCTTACTCTGTGCGCCAGGCTGCAGTGCAGTGGCATGATCTTGGCTCACTGCAAC  
CTTACTTCCCGGGTTCAAGTGAT

>1172

AGTCTTACTCTGTGCGCCAGGCTGCAGTGCAGTGGCATGATCTTGGCTCACTGCAACCT  
CTACTTCCCGGGTTCAAGTGATTCTCCTGCCTCAGCCTCCTGAGCAGCTGGGACTACA  
GATGTGTACCACCATGCCCGACT

>1173

ACTCTGTGCGCCAGGCTGCAGTGCAGTGGCATGATCTTGGCTCACTGCAACCTTACTT  
CCCGGGTTCAAGTGATTCTCCTGCCTCAGCCTCCTGAGCAGCTGGGACTACAGATGTG  
TACCACCATGCCCGACTAATTTT

>1174

CTGCAACCTTACTTCCCGGGTTCAAGTGATTCTCCTGCCTCAGCCTCCTGAGCAGCTG  
GGACTACAGATGTGTACCACCATGCCCGACTAATTTTGTATTTTGTATTTTGTAGAGATGGGGT  
TTCACCATGTTGGTCAGGCTG

>1175

GCAACCTTACTTCCCGGGTTCAAGTGATTCTCCTGCCTCAGCCTCCTGAGCAGCTGG  
GACTACAGATGTGTACCACCATGCCCGACTAATTTTGTATTTTGTAGAGATGGGGTT  
TCACCATGTTGGTCAGGCTGGC

>1176

TGATTCTCCTGCCTCAGCCTCCTGAGCAGCTGGGACTACAGATGTGTACCACCATGCC  
GACTAATTTTGTATTTTGTAGAGATGGGGTTTTCACCATGTTGGTCAGGCTGGCCTG  
GAACTCCTGGCCTTAAGTGATC

>1177

CCTGAGCAGCTGGGACTACAGATGTGTACCACCATGCCCGACTAATTTTGTATTTTGA  
GTAGAGATGGGGTTTTCACCATGTTGGTCAGGCTGGCCTGGAACCTCCTGGCCTTAAGT  
ATCCACCTGTCTCGGCCTCCCAT

>1178

TGGGACTACAGATGTGTACCACCATGCCCGACTAATTTTGTATTTTGTAGAGATGGG  
GTTTTCACCATGTTGGTCAGGCTGGCCTGGAACCTCCTGGCCTTAAGTGATCCACCTGTCT  
CGGCCTCCCATAGTGCTGGGA

>1179

ATTTTGTATTTTGTAGAGATGGGGTTTTCACCATGTTGGTCAGGCTGGCCTGGAACCT  
CCTGGCCTTAAGTGATCCACCTGTCTCGGCCTCCCATAGTGCTGGGATTATAGGTGTGT  
GCCACCTGCTGGGCCGAGAAT

>1180

TTTAGTAGAGATGGGGTTTTCACCATGTTGGTCAGGCTGGCCTGGAACCTCCTGGCCTTAA  
GTGATCCACCTGTCTCGGCCTCCCATAGTGCTGGGATTATAGGTGTGTGCCACCCTGCT  
GGGCCGAGAATGTGCTTTTGAC

>1181

TTTTCACCATGTTGGTCAGGCTGGCCTGGAACCTCCTGGCCTTAAGTGATCCACCTGTCTC  
GGCCTCCCATAGTGCTGGGATTATAGGTGTGTGCCACCCTGCTGGGCCGAGAATGTGCT  
TTTGACTGAGGGTGGAAAGTCA

>1182

CAGGCTGGCCTGGAACCTCGGCCTTAAGTGATCCACCTGTCTCGGCCTCCCATAGTGC  
TGGGATTATAGGTGTGTGCCACCCTGCTGGGCCGAGAATGTGCTTTTACTGAGGGTG  
GAAAGTCAGCAGCTGCAGCCAA

>1183

GGCCTCCCATAGTGTGGGATTATAGGTGTGTGCCACCCTGCTGGGCCGAGAATGTGCT  
TTTACTGAGGGTGGAAAGTCAGCAGCTGCAGCCCAAGAAGTTAGAGCCAGGGGCAG  
TGCCTTTGATGGGAAGCTTGGGGG

>1184

CATAGTGTGGGATTATAGGTGTGTGCCACCCTGCTGGGCCGAGAATGTGCTTTTACT  
GAGGGTGGAAAGTCAGCAGCTGCAGCCCAAGAAGTTAGAGCCAGGGGCAGTGCCTTT  
GATGGGAAGCTTGGGGGTCTAAAG

>1185

TGTGCCACCCTGCTGGGCCGAGAATGTGCTTTTACTGAGGGTGGAAAGTCAGCAGCT  
GCAGCCCAAGAAGTTAGAGCCAGGGGCAGTGCCTTTGATGGGAAGCTTGGGGGTCTA  
AAGAAATCAGAAAGGGGAGAAAATA

>1186

GCCGAGAATGTGCTTTTACTGAGGGTGGAAAGTCAGCAGCTGCAGCCCAAGAAGTT  
AGAGCCAGGGGCAGTGCCTTTGATGGGAAGCTTGGGGGTCTAAAGAAATCAGAAAGG  
GGAGAAAATAATCCTGCGTGTGCTCA

>1187

GGTGGAAAGTCAGCAGCTGCAGCCCAAGAAGTTAGAGCCAGGGGCAGTGCCTTTGAT  
GGGAAGCTTGGGGGTCTAAAGAAATCAGAAAGGGGAGAAAATAATCCTGCGTGTGCT  
CAGCCCTCACTCAGATCAACAGCCCC

>1188

CCAGGGGCAGTGCCTTTGATGGGAAGCTTGGGGGTCTAAAGAAATCAGAAAGGGGAG  
AAAATAATCCTGCGTGTGCTCAGCCCTCACTCAGATCAACAGCCCCTCGGGTCCCAGC  
TAGATGTACTTTGTAGAAGGCTTTT

>1189

AGGGGCAGTGCCTTTGATGGGAAGCTTGGGGGTCTAAAGAAATCAGAAAGGGGAGAA  
AATAATCCTGCGTGTGCTCAGCCCTCACTCAGATCAACAGCCCCTCGGGTCCCAGCTA  
GATGTACTTTGTAGAAGGCTTTTTT

>1190

AAAGAAATCAGAAAGGGGAGAAAATAATCCTGCGTGTGCTCAGCCCTCACTCAGATCA  
ACAGCCCCTCGGGTCCCAGCTAGATGTACTTTGTAGAAGGCTTTTTTCTCCCCCTCAC  
CCTCAAAACTCCAGGATTAATGT

>1191

AGGGGAGAAAATAATCCTGCGTGTGCTCAGCCCTCACTCAGATCAACAGCCCCTCGGG  
TCCCAGCTAGATGTACTTTGTAGAAGGCTTTTTTCTCCCCCTCACCTCAAAACTCCA  
GGATTAATGTGCTATTCCCTTTT

>1192

GGGTCCCAGCTAGATGTACTTTGTAGAAGGCTTTTTTCTCCCCCTCACCTCAAAACT  
CCAGGATTAATGTGCTATTCCCTTTTTTCTACTGTTCTGTCTCCCCCAACCCATCAG  
CAGTCTGAGAAATGCTATGGT

>1193

GTAGAAGGCTTTTTTCTCCCCCTCACCTCAAAACTCCAGGATTAATGTGCTATTCCCT

TTTTTCTACTGTTCTCTGTCTCCCCCAACCCATCAGCAGTCTGAGAAATGCTATGGTG  
GAAAAAAAAAAACAACAGCCC

>1194

GCTTTTTTTCTCCCCCTCACCTCAAACCTCCAGGATTAATGTGCTATTCCCTTTTTTCT  
ACTGTTCTCTGTCTCCCCCAACCCATCAGCAGTCTGAGAAATGCTATGGTGAAAAA  
AAAAACAACAGCCCTATAACC

>1195

TCAAACCTCCAGGATTAATGTGCTATTCCCTTTTTTCTACTGTTCTCTGTCTCCCCCAA  
CCCATCAGCAGTCTGAGAAATGCTATGGTGAAAAAAAAAAAAACAACAGCCCTATAACC  
AGTACAAAACAAAAAGCCAAGAC

>1196

TCTCCCCCAACCCATCAGCAGTCTGAGAAATGCTATGGTGAAAAAAAAAAAAACAAC  
AGCCCTATAACCAGTACAAAACAAAAAGCCAAGACAAAAAAAAAAAAAAAAAAAAATC  
AGAAGGGGAGATTTGAGGCCAGGAAG

>1197

AAAAAAAAAAAAAATCAGAAGGGGAGATTTGAGGCCAGGAAGCCATGGCATTAC  
TGAAATATATCAGTGATAAAATAACAGGCTACAGGGTTTATTTATTTATTTTAAAGTC  
AATAGCCTGAGTGTGGTAAA

>1198

GGAGATTTGAGGCCAGGAAGCCATGGCATTCACTGAAATATATCAGTGATAAAATAA  
CAGGCTACAGGGTTTATTTATTTATTTTAAAGTCAATAGGCCTGAGTGTGGTAAAGA  
CTAGATACCCAGCAATCCTTC

>1199

CATGGCATTCACTGAAATATATCAGTGATAAAATAACAGGCTACAGGGTTTATTTATT  
TTATTTTAAAGTCAATAGGCCTGAGTGTGGTAAAGACTAGATACCCAGCAATCCTTCTT  
GCATTTCTTCTGGGGTCGG

>1200

GAAATATATCAGTGATAAAATAACAGGCTACAGGGTTTATTTATTTATTTTAAAGTCAA  
TAGGCCTGAGTGTGGTAAAGACTAGATACCCAGCAATCCTTCTTGCATTTCTTCTTGG  
GGTCGGGGGGCAGAAGGGAA

>1201

AATATATCAGTGATAAAATAACAGGCTACAGGGTTTATTTATTTATTTTAAAGTCAATA  
GGCCTGAGTGTGGTAAAGACTAGATACCCAGCAATCCTTCTTGCATTTCTTCTTGGGG  
TCGGGGGGCAGAAGGGAATG

>1202

TATCAGTGATAAAATAACAGGCTACAGGGTTTATTTATTTATTTTAAAGTCAATAGGCC  
TGAGTGTGGTAAAGACTAGATACCCAGCAATCCTTCTTGCATTTCTTCTTGGGGTCGG  
GGGGCAGAAGGGAATGGAGA

>1203

TTAAGTCAATAGGCCTGAGTGTGGTAAAGACTAGATACCCAGCAATCCTTCTTGCAT  
TTCTTCTTGGGGTCGGGGGGCAGAAGGGAATGGAGAGGAAATGAAGCGGATTGCTG  
GTAAGTGAGGCAGGAAGGCAGGGA

>1204

ATCCTTCTTGCATTTCTTCTTGGGGTCGGGGGGCAGAAGGGAATGGAGAGGAAATGAA  
GGCGGATTGCTGGTAAAGTGAGGCAGGAAGGCAGGGAGTTATTATGGAATGTCATCGG  
TAAGTTTCCCATGATTTGATCCC

>1205

TTCTTGCAATTTCTTCTTGGGGTCGGGGGGCAGAAGGGAATGGAGAGGAAATGAAGGC  
GGATTGCTGGTAAGTGAGGCAGGAAGGCAGGGAGTTTATTATGGAATGTCATCGGTAA  
GTTTCCCATGATTTGATCCAAGC

>1206

GTCGGGGGGCAGAAGGGAATGGAGAGGAAATGAAGGCGGATTGCTGGTAAGTGAGG  
CAGGAAGGCAGGGAGTTTATTATGGAATGTCATCGGTAAGTTTCCCATGATTTGATCC  
CAAGCTGGTGTGGAGTGAAGGGTAA

>1207

GGGAATGGAGAGGAAATGAAGGCGGATTGCTGGTAAGTGAGGCAGGAAGGCAGGGA  
GTTTATTATGGAATGTCATCGGTAAGTTTCCCATGATTTGATCCAAGCTGGTGTGGAG  
TGAAGGGTAAGCTGTTGGCTCAAC

>1208

GAGAGGAAATGAAGGCGGATTGCTGGTAAGTGAGGCAGGAAGGCAGGGAGTTTATTA  
TGGAATGTCATCGGTAAGTTTCCCATGATTTGATCCAAGCTGGTGTGGAGTGAAGGG  
TAAGCTGTTGGCTCAACAGATAGT

>1209

GAGGCAGGAAGGCAGGGAGTTTATTATGGAATGTCATCGGTAAGTTTCCCATGATTTG  
ATCCAAGCTGGTGTGGAGTGAAGGGTAAGCTGTTGGCTCAACAGATAGTGAGAATCA  
AACTTAGTGGAGTTGTAGATCCT

>1210

GAAGGCAGGGAGTTTATTATGGAATGTCATCGGTAAGTTTCCCATGATTTGATCCCAA  
GCTGGTGTGGAGTGAAGGGTAAGCTGTTGGCTCAACAGATAGTGAGAATCAAACCTAG  
TGGAGTTGTAGATCCTGTTTCCT

>1211

GGGAGTTTATTATGGAATGTCATCGGTAAGTTTCCCATGATTTGATCCAAGCTGGTGT  
GGAGTGAAGGGTAAGCTGTTGGCTCAACAGATAGTGAGAATCAAACCTTAGTGGAGTTG  
TAGATCCTGTTTCCTGCAGCGG

>1212

TATTATGGAATGTCATCGGTAAGTTTCCCATGATTTGATCCAAGCTGGTGTGGAGTGA  
AGGGTAAGCTGTTGGCTCAACAGATAGTGAGAATCAAACCTTAGTGGAGTTGTAGATCC  
TGTTTCCTGCAGCGGACAGCAA

>1213

CGGTAAGTTTCCCATGATTTGATCCAAGCTGGTGTGGAGTGAAGGGTAAGCTGTTG  
GCTCAACAGATAGTGAGAATCAAACCTTAGTGGAGTTGTAGATCCTGTTTCCTGCAGCG  
GACAGCAAGATGTACAAGCCGTCC

>1214

GTGTGGAGTGAAGGGTAAGCTGTTGGCTCAACAGATAGTGAGAATCAAACCTTAGTGG  
GTTGTAGATCCTGTTTCCTGCAGCGGACAGCAAGATGTACAAGCCGTCCACTGCAGGA  
ATGACGTGCTGTAAAAGGGATGCA

>1215

GGCTCAACAGATAGTGAGAATCAAACCTTAGTGGAGTTGTAGATCCTGTTTCCTGCAGC  
GGACAGCAAGATGTACAAGCCGTCCACTGCAGGAATGACGTGCTGTAAAAGGGATGC  
AGTGTCAAGTGTAGTCATGGATGGG

>1216

GATAGTGAGAATCAAACCTTAGTGGAGTTGTAGATCCTGTTTCCTGCAGCGGACAGCAA

GATGTACAAGCCGTCCACTGCAGGAATGACGTGCTGTAAAAGGGATGCAGTGCAAGT  
GTAGTCATGGATGGGTGGGAAGAC

>1217

GAGTTGTAGATCCTGTTTCCTGCAGCGGACAGCAAGATGTACAAGCCGTCCACTGCAG  
GAATGACGTGCTGTAAAAGGGATGCAGTGCAAGTGTAGTCATGGATGGGTGGGAAG  
ACCAGACAAAGGCATCCAATGGGAC

>1218

GTTTCCTGCAGCGGACAGCAAGATGTACAAGCCGTCCACTGCAGGAATGACGTGCTGT  
AAAAGGGATGCAGTGCAAGTGTAGTCATGGATGGGTGGGAAGACCAGACAAAGGCA  
TCCAATGGGACTGACTTACCTAAAC

>1219

TTCCTGCAGCGGACAGCAAGATGTACAAGCCGTCCACTGCAGGAATGACGTGCTGTAA  
AAGGGATGCAGTGCAAGTGTAGTCATGGATGGGTGGGAAGACCAGACAAAGGCATC  
CAATGGGACTGACTTACCTAAACAA

>1220

TGTACAAGCCGTCCACTGCAGGAATGACGTGCTGTAAAAGGGATGCAGTGCAAGTGT  
AGTCATGGATGGGTGGGAAGACCAGACAAAGGCATCCAATGGGACTGACTTACCTAA  
ACAAACCAGAAGGAAGTCAGAACAG

>1221

TCATGGATGGGTGGGAAGACCAGACAAAGGCATCCAATGGGACTGACTTACCTAAACA  
AACCAGAAGGAAGTCAGAACAGTGGGAAGATCTGATAGATAAGCAGTATTCTGCAGG  
CAGATGAAGGAGCAAGCTTTGGGCC

>1222

GGTGGGAAGACCAGACAAAGGCATCCAATGGGACTGACTTACCTAAACAAACCAGAA  
GGAAGTCAGAACAGTGGGAAGATCTGATAGATAAGCAGTATTCTGCAGGCAGATGAAG  
GAGCAAGCTTTGGGCCCCCAAATCT

>1223

CCAATGGGACTGACTTACCTAAACAAACCAGAAGGAAGTCAGAACAGTGGGAAGATC  
TGATAGATAAGCAGTATTCTGCAGGCAGATGAAGGAGCAAGCTTTGGGCCCCCAAATC  
TTCACCAGTGCATCCACATTACAGA

>1224

AGATCTGATAGATAAGCAGTATTCTGCAGGCAGATGAAGGAGCAAGCTTTGGGCCCCC  
AAATCTTCACCAGTGCATCCACATTACAGAGGATAATGCCTGAGGGAGGGGAAGATCA  
TCTCAGGATTCTGGAACACTGGGC

>1225

GGGAGGGGAAGATCATCTCAGGATTCTGGAACACTGGGCCCTCCCTTTCTTATTCCAA  
AAGGCTGGAGCAGTTCTGCATGTAGGCTTCTCTGGAATGGTCTAGGAACCAGCTCAT  
CCAGGCCAGGAGCACCTGATCATT

>1226

AGATCATCTCAGGATTCTGGAACACTGGGCCCTCCCTTTCTTATTCCAAAAGGCTGGAG  
CAGTTCTGCATGTAGGCTTCTCTGGAATGGTCTAGGAACCAGCTCATCCAGGCCAGG  
AGCACCTGATCATTCTCAGAGTT

>1227

GAACACTGGGCCCTCCCTTTCTTATTCCAAAAGGCTGGAGCAGTTCTGCATGTAGGCTT  
CTCTGGAATGGTCTAGGAACCAGCTCATCCAGGCCAGGAGCACCTGATCATTCTCAG  
AGTTACGTACATATGCGATAAGA

>1228

AGGCTTCTCTGGAAATGGTCTAGGAACCAGCTCATCCAGGCCAGGAGCACCTGATCAT  
TCTCAGAGTTACGTACATATGCGATAAGATTGCAGGGAACAGTATAGTTCTATAGACTTA  
AGTGTGAACATAGTCCTCATTT

>1229

GCTCATCCAGGCCAGGAGCACCTGATCATTCTCAGAGTTACGTACATATGCGATAAGAT  
TGCAGGGAACAGTATAGTTCTATAGACTTAAGTGTGAACATAGTCCTCATTTATAGTCCC  
TAGTCTCCCATGGCTCACGCA

>1230

CCTGATCATTCTCAGAGTTACGTACATATGCGATAAGATTGCAGGGAACAGTATAGTTCT  
ATAGACTTAAGTGTGAACATAGTCCTCATTTATAGTCCCTAGTCTCCCATGGCTCACGCA  
GCTTGGTCTTTATGTGTTTC

>1231

TCAGAGTTACGTACATATGCGATAAGATTGCAGGGAACAGTATAGTTCTATAGACTTAA  
GTGTGAACATAGTCCTCATTTATAGTCCCTAGTCTCCCATGGCTCACGCAGCTTGGTCTT  
TATGTGTTTCTGAATTTAGTG

>1232

CATATGCGATAAGATTGCAGGGAACAGTATAGTTCTATAGACTTAAGTGTGAACATAGT  
CCTCATTTATAGTCCCTAGTCTCCCATGGCTCACGCAGCTTGGTCTTTATGTGTTTCTGA  
ATTTAGTGCTGCAGAGGCACA

>1233

GATAAGATTGCAGGGAACAGTATAGTTCTATAGACTTAAGTGTGAACATAGTCCTCATTT  
ATAGTCCCTAGTCTCCCATGGCTCACGCAGCTTGGTCTTTATGTGTTTCTGAATTTAGTG  
CTGCAGAGGCACAATGGGGT

>1234

GTTCTATAGACTTAAGTGTGAACATAGTCCTCATTTATAGTCCCTAGTCTCCCATGGCTC  
ACGCAGCTTGGTCTTTATGTGTTTCTGAATTTAGTGCTGCAGAGGCACAATGGGGTCTG  
GTTTCTGGATCTTATACAGAC

>1235

ATAGTCCCTCATTTATAGTCCCTAGTCTCCCATGGCTCACGCAGCTTGGTCTTTATGTGTTT  
CTGAATTTAGTGCTGCAGAGGCACAATGGGGTCTGGTTTCTGGATCTTATACAGACAAG  
CACTTAGGTCAGCTGCAGTG

>1236

TAGTCTCCCATGGCTCACGCAGCTTGGTCTTTATGTGTTTCTGAATTTAGTGCTGCAGA  
GGCACAATGGGGTCTGGTTTCTGGATCTTATACAGACAAGCACTTAGGTCAGCTGCAG  
TGGATGTCCTGCACAGACACCGT

>1237

GTTTCTGAATTTAGTGCTGCAGAGGCACAATGGGGTCTGGTTTCTGGATCTTATACAGA  
CAAGCACTTAGGTCAGCTGCAGTGGATGTCCTGCACAGACACCGTCGCAACTCTTGCC  
TGGTTCCTTTTTGTTTTTGGAGA

>1238

TTAGTGCTGCAGAGGCACAATGGGGTCTGGTTTCTGGATCTTATACAGACAAGCACTTA  
GGTCAGCTGCAGTGGATGTCCTGCACAGACACCGTCGCAACTCTTGCTGGTTCTTT  
TTGTTTTTGGAGATGGAGTCTCG

>1239

GGGTCTGGTTTCTGGATCTTATACAGACAAGCACTTAGGTCAGCTGCAGTGGATGTCCT



GCACAGACACCGTCGCAACTCTTGCCTGGTTCCTTTTTGTTTTGGAGATGGAGTCTCG  
CTCTGTCTCCCAGGCTGGAGTG

>1240

CAAGCACTTAGGTCAGCTGCAGTGGATGTCCTGCACAGACACCGTCGCAACTCTTGCC  
TGGTTCCTTTTTGTTTTGGAGATGGAGTCTCGCTGTCTCCCAGGCTGGAGTGCAGT  
GGCGCGATCTCAGCTCACTGCAA

>1241

GCTGCAGTGGATGTCCTGCACAGACACCGTCGCAACTCTTGCCTGGTTCCTTTTTGTTT  
TTGGAGATGGAGTCTCGCTGTCTCCCAGGCTGGAGTGCAGTGGCGCGATCTCAGCT  
CACTGCAAGCTCTGCCTCCCAGG

>1242

ATGTCCTGCACAGACACCGTCGCAACTCTTGCCTGGTTCCTTTTTGTTTTGGAGATGG  
AGTCTCGCTGTCTCCCAGGCTGGAGTGCAGTGGCGCGATCTCAGCTCACTGCAAGC  
TCTGCCTCCCAGGTTACGCTAT

>1243

AGTCTCGCTGTCTCCCAGGCTGGAGTGCAGTGGCGCGATCTCAGCTCACTGCAAGC  
TCTGCCTCCCAGGTTACGCTATTCTCCTGCCTCAGCCTCCCAAGTAGTTGGGACTACA  
GGCACCCGCCACCACGCCCGCT

>1244

TGGCGCGATCTCAGCTCACTGCAAGCTCTGCCTCCCAGGTTACGCTATTCTCCTGCCT  
CAGCCTCCCAAGTAGTTGGGACTACAGGCACCCGCCACCACGCCCGGCTAATTTTTTG  
TATTTTTAGTAGAGACAGGGTTT

>1245

CGCGATCTCAGCTCACTGCAAGCTCTGCCTCCCAGGTTACGCTATTCTCCTGCCTCAG  
CCTCCCAAGTAGTTGGGACTACAGGCACCCGCCACCACGCCCGGCTAATTTTTTGATT  
TTAGTAGAGACAGGGTTTCAC

>1246

TATTCTCCTGCCTCAGCCTCCCAAGTAGTTGGGACTACAGGCACCCGCCACCACGCC  
GGCTAATTTTTTGATTTTTTAGTAGAGACAGGGTTTACCGTGTTAGCCAGTATGGTCTC  
GATCTCCTGAACTCGTGATCCA

>1247

CCAAGTAGTTGGGACTACAGGCACCCGCCACCACGCCCGGCTAATTTTTTGATTTTTA  
GTAGAGACAGGGTTTACCGTGTTAGCCAGTATGGTCTCGATCTCCTGAACTCGTGATC  
CACCTGCCTCGGCCTCCCAAAG

>1248

TTGGGACTACAGGCACCCGCCACCACGCCCGGCTAATTTTTTGATTTTTTAGTAGAGAC  
AGGGTTTACCGTGTTAGCCAGTATGGTCTCGATCTCCTGAACTCGTGATCCACCTGCC  
TCGGCCTCCCAAAGTGCTGGGA

>1249

CCCGCCACCACGCCCGGCTAATTTTTTGATTTTTTAGTAGAGACAGGGTTTACCGTGT  
TAGCCAGTATGGTCTCGATCTCCTGAACTCGTGATCCACCTGCCTCGGCCTCCCAAAGT  
GCTGGGATTACAGGTGTGAGCC

>1250

GGTTTACCGTGTTAGCCAGTATGGTCTCGATCTCCTGAACTCGTGATCCACCTGCCTC  
GGCCTCCCAAAGTGCTGGGATTACAGGTGTGAGCCACCACGCCCGGCTATTGCCTGG  
TTCTTGAAGGGATTCTCAGGAAC

>1251

GCCAGTATGGTCTCGATCTCCTGAACTCGTGATCCACCTGCCTCGGCCTCCCAAAGTGC  
TGGGATTACAGGTGTGAGCCACCACGCCCCGGCCTATTGCCTGGTTCTTGAAGGGATTCT  
CAGGAACCACAGGGAATGTCTG

>1252

ATCCACCTGCCTCGGCCTCCCAAAGTGCTGGGATTACAGGTGTGAGCCACCACGCCCCG  
GCCTATTGCCTGGTTCTTGAAGGGATTCTCAGGAACCACAGGGAATGTCTGAGCCAGC  
TTTCTGGATCCGTGTGTACAGCCC

>1253

TACAGGTGTGAGCCACCACGCCCCGGCCTATTGCCTGGTTCTTGAAGGGATTCTCAGGA  
ACCACAGGGAATGTCTGAGCCAGCTTTCTGGATCCGTGTGTACAGCCCTTCCCAGAGG  
CTTTGTGGAGCCAGCTGTACGGTG

>1254

GGCCTATTGCCTGGTTCTTGAAGGGATTCTCAGGAACCACAGGGAATGTCTGAGCCAG  
CTTTCTGGATCCGTGTGTACAGCCCTTCCCAGAGGCTTTGTGGAGCCAGCTGTACGGT  
GCATGAGCTTTGTGGCTAAGATAT

>1255

CCTATTGCCTGGTTCTTGAAGGGATTCTCAGGAACCACAGGGAATGTCTGAGCCAGCT  
TTCTGGATCCGTGTGTACAGCCCTTCCCAGAGGCTTTGTGGAGCCAGCTGTACGGTGC  
ATGAGCTTTGTGGCTAAGATATCA

>1256

TCTCAGGAACCACAGGGAATGTCTGAGCCAGCTTTCTGGATCCGTGTGTACAGCCCTT  
CCCAGAGGCTTTGTGGAGCCAGCTGTACGGTGCATGAGCTTTGTGGCTAAGATATCAG  
AGTTCTGCCTGGCCCTTGGCCTTG

>1257

CAGGGAATGTCTGAGCCAGCTTTCTGGATCCGTGTGTACAGCCCTTCCCAGAGGCTTT  
GTGGAGCCAGCTGTACGGTGCATGAGCTTTGTGGCTAAGATATCAGAGTTCTGCCTGG  
CCCTTGGCCTTGGTCTCTCTCAGA

>1258

GTACAGCCCTTCCCAGAGGCTTTGTGGAGCCAGCTGTACGGTGCATGAGCTTTGTGGC  
TAAGATATCAGAGTTCTGCCTGGCCCTTGGCCTTGGTCTCTCTCAGATGGTCAGCTGCT  
CTGTTTTTAGTGGTTGATCATGT

>1259

GTGGAGCCAGCTGTACGGTGCATGAGCTTTGTGGCTAAGATATCAGAGTTCTGCCTGG  
CCCTTGGCCTTGGTCTCTCTCAGATGGTCAGCTGCTCTGTTTTTAGTGGTTGATCATGTA  
GAAGGCCAACAGGTGTTGACCT

>1260

CTTTGTGGCTAAGATATCAGAGTTCTGCCTGGCCCTTGGCCTTGGTCTCTCTCAGATGG  
TCAGTGCTCTGTTTTTAGTGGTTGATCATGTAGAAGGCCAACAGGTGTTGACCTTGGT  
TTAGGCTACTTTTGGGATTTTT

>1261

GCTAAGATATCAGAGTTCTGCCTGGCCCTTGGCCTTGGTCTCTCTCAGATGGTCAGCTG  
CTCTGTTTTTAGTGGTTGATCATGTAGAAGGCCAACAGGTGTTGACCTTGGTTTAGGCT  
ACTTTTGGGATTTTTGAGGTTT

>1262

GAGTTCTGCCTGGCCCTTGGCCTTGGTCTCTCTCAGATGGTCAGCTGCTCTGTTTTTAG

TGGTTGATCATGTAGAAAGGCCAACAGGTGTTGACCTTGGTTTAGGCTACTTTTGGGATT  
TTTGAGGTTTCCTGAGACTCTT

>1263

CTCTCTCAGATGGTCAGCTGCTCTGTTTTTAGTGGTTGATCATGTAGAAAGGCCAACAGG  
TGTTGACCTTGGTTTAGGCTACTTTTGGGATTTTTGAGGTTTCCTGAGACTCTTGTTTT  
CTTTCATCATCCCGTCCAGAA

>1264

TTTAGTGGTTGATCATGTAGAAAGGCCAACAGGTGTTGACCTTGGTTTAGGCTACTTTTG  
GGATTTTTGAGGTTTCCTGAGACTCTTGTTTTCTTTCATCATCCCGTCCAGAACCTCTG  
ATGTCAAATAAATTCTGTTT

>1265

TAGAAAGGCCAACAGGTGTTGACCTTGGTTTAGGCTACTTTTGGGATTTTTGAGGTTTCC  
TGAGACTCTTGTTTTCTTTCATCATCCCGTCCAGAACCTCTGATGTCAAATAAATTCT  
GTTTGGAAAAGGGTATGCTGT

>1266

TACTTTTGGGATTTTTGAGGTTTCCTGAGACTCTTGTTTTCTTTCATCATCCCGTCCAG  
AACCTCTGATGTCAAATAAATTCTGTTTGGAAAAGGGTATGCTGTAGAATAATGATAG  
CCACAGCAATGATATTAATAA

>1267

TGAGGTTTCCTGAGACTCTTGTTTTCTTTCATCATCCCGTCCAGAACCTCTGATGTCA  
AACTAAATTCTGTTTGGAAAAGGGTATGCTGTAGAATAATGATAGCCACAGCAATGATA  
TTAATAATACCTTTTATCGGTT

>1268

AGACTCTTGTTTTCTTTCATCATCCCGTCCAGAACCTCTGATGTCAAATAAATTCTGT  
TTGAAAAGGGTATGCTGTAGAATAATGATAGCCACAGCAATGATATTAATAATACCTTT  
TATCGGTTGCAGCATTCTTCT

>1269

TCTGTTTGGAAAAGGGTATGCTGTAGAATAATGATAGCCACAGCAATGATATTAATAATA  
CCTTTTATCGGTTGCAGCATTCTTCTTTGCAAAGCACCTCTAATGACTTTATCTCTCTT  
GCCCTCACAGCCTTCCTTG

>1270

TTGCAGCATTCTTCTTTGCAAAGCACCTCTAATGACTTTATCTCTCTTGCCCTCACAG  
CCTTCCTTGAGTGGGTACAGGTCCATAATCCCATATCTGTGATAATGAAGTCTGAAAAG  
CTCTGAAAATAAAAAGTTTG

>1271

AGCATTTTCTTCTTTGCAAAGCACCTCTAATGACTTTATCTCTCTTGCCCTCACAGCCTT  
CCTTGAGTGGGTACAGGTCCATAATCCCATATCTGTGATAATGAAGTCTGAAAAGCTCT  
GAAAATAAAAAGTTTGCAGT

>1272

CTCTAATGACTTTATCTCTCTTGCCCTCACAGCCTTCCTTGAGTGGGTACAGGTCCATAA  
TCCCATATCTGTGATAATGAAGTCTGAAAAGCTCTGAAAATAAAAAGTTTGCAGTAA  
ACTCATTTAGTGGCAAACCTG

>1273

TTATCTCTCTTGCCCTCACAGCCTTCCTTGAGTGGGTACAGGTCCATAATCCCATATCTG  
TGATAATGAAGTCTGAAAAGCTCTGAAAATAAAAAGTTTGCAGTAAACTCATTTAGT  
GGCAAACCTGATCTGAACTGA



GCGGACTGCAGTGGCGCAATCTCGGCTCACTGCAAGCTCCGCTCCCGGGTTCATGCC  
ATTCTCCTGCCTCAGCCTCCCG

>1286

CTCTGTGCGCCAGGTCGGACTGCGGACTGCAGTGGCGCAATCTCGGCTCACTGCAAGC  
TCCGCTTCCCGGGTTCATGCCATTCTCCTGCCTCAGCCTCCCGAGTAGCTGGGACTACA  
GGCGCCCGCCACCGCGCCCGGCT

>1287

TGGCGCAATCTCGGCTCACTGCAAGCTCCGCTCCCGGGTTCATGCCATTCTCCTGCCT  
CAGCCTCCCGAGTAGCTGGGACTACAGGCGCCCGCCACCGCGCCCGGCTAATTTTTTG  
TATTTTTAGTAGAGACGGGGTTT

>1288

CATTCTCCTGCCTCAGCCTCCCGAGTAGCTGGGACTACAGGCGCCCGCCACCGCGCCC  
GGCTAATTTTTGTATTTTTAGTAGAGACGGGGTTTACCTTGTTAGCCAGGATGGTCTC  
GATCTCCTGACCTCATGATCCA

>1289

GCCTCAGCCTCCCGAGTAGCTGGGACTACAGGCGCCCGCCACCGCGCCCGGCTAATTT  
TTTGTATTTTTAGTAGAGACGGGGTTTACCTTGTTAGCCAGGATGGTCTCGATCTCCTG  
ACCTCATGATCCACCCGCCTCG

>1290

CCGAGTAGCTGGGACTACAGGCGCCCGCCACCGCGCCCGGCTAATTTTTGTATTTTTA  
GTAGAGACGGGGTTTACCTTGTTAGCCAGGATGGTCTCGATCTCCTGACCTCATGATC  
CACCCGCCTCGGCCTCCCAAAG

>1291

GGGACTACAGGCGCCCGCCACCGCGCCCGGCTAATTTTTGTATTTTTAGTAGAGACGG  
GGTTTACCTTGTTAGCCAGGATGGTCTCGATCTCCTGACCTCATGATCCACCCGCCTC  
GGCCTCCCAAAGTGCTGGGATT

>1292

GGTTTACCTTGTTAGCCAGGATGGTCTCGATCTCCTGACCTCATGATCCACCCGCCTC  
GGCCTCCCAAAGTGCTGGGATTACAGGCGTGAGCACCGCGCCCGGCCAGAGTACCTT  
TCTAAAGTCTGAACAGTTTTGGT

>1293

CAGGATGGTCTCGATCTCCTGACCTCATGATCCACCCGCCTCGGCCTCCCAAAGTGCTG  
GGATTACAGGCGTGAGCACCGCGCCCGGCCAGAGTACCTTTCTAAAGTCTGAACAGT  
TTTGGTCGTTGAAGCACCTGAAG

>1294

CTCATGATCCACCCGCCTCGGCCTCCCAAAGTGCTGGGATTACAGGCGTGAGCACCGC  
GCCCGGCCAGAGTACCTTTCTAAAGTCTGAACAGTTTTGGTCGTTGAAGCACCTGAA  
GGTTTTGGATAAGGATTATGAAC

>1295

CGCCTCGGCCTCCCAAAGTGCTGGGATTACAGGCGTGAGCACCGCGCCCGGCCAGAG  
GTACCTTTCTAAAGTCTGAACAGTTTTGGTCGTTGAAGCACCTGAAGGTTTTGGATAAG  
GGATTATGAACGATTATCATTCTC

>1296

CTCCCAAAGTGCTGGGATTACAGGCGTGAGCACCGCGCCCGGCCAGAGTACCTTTCT  
AAAGTCTGAACAGTTTTGGTCGTTGAAGCACCTGAAGGTTTTGGATAAGGATTATGA  
ACGATTATCATTCTCTATTGACAA

>1297

GTGAGCACCGCGCCCGGCCAGAGTACCTTTCTAAAGTCTGAACAGTTTTGGTCGTTG  
AAGCACCTGAAGGTTTTGGATAAGGGATTATGAACGATTATCATTCTCTATTGACAAAT  
GAGGAAAATGAGATTTGGAGCAA

>1298

GTTTTGGATAAGGGATTATGAACGATTATCATTCTCTATTGACAAATGAGGAAAATGAGA  
TTTGGAGCAAGTAAGTGACTTCCCATGGTCACACAGCTATAAATGGGTAGAACCAGGC  
ACTCAGCTTGCCTTCTAATTCA

>1299

TGGATAAGGGATTATGAACGATTATCATTCTCTATTGACAAATGAGGAAAATGAGATTTG  
GAGCAAGTAAGTGACTTCCCATGGTCACACAGCTATAAATGGGTAGAACCAGGCACTC  
AGCTTGCCTTCTAATTCACAGT

>1300

ATGAACGATTATCATTCTCTATTGACAAATGAGGAAAATGAGATTTGGAGCAAGTAAGT  
GACTTCCCATGGTCACACAGCTATAAATGGGTAGAACCAGGCACTCAGCTTGCCTTCTA  
ATTCACAGTCTGGGCGCTCTG

>1301

TATTGACAAATGAGGAAAATGAGATTTGGAGCAAGTAAGTGACTTCCCATGGTCACAC  
AGCTATAAATGGGTAGAACCAGGCACTCAGCTTGCCTTCTAATTCACAGTCTGGGCGC  
TCTGCACCAGGCCATATAAGAAC

>1302

AAGTGACTTCCCATGGTCACACAGCTATAAATGGGTAGAACCAGGCACTCAGCTTGCC  
TTCTAATTCACAGTCTGGGCGCTCTGCACCAGGCCATATAAGAACATGAGCATTGCTC  
TTCTGGGTCAAATCCATCTGACC

>1303

TTGCCTTCTAATTCACAGTCTGGGCGCTCTGCACCAGGCCATATAAGAACATGAGCAT  
TGCTCTTCTGGGTCAAATCCATCTGACCTAGTCTTTGGTTGCCATCACCATGCCTAAGAT  
ACCACCATTGGAGGCTACAAC

>1304

CCTGGGCGCTCTGCACCAGGCCATATAAGAACATGAGCATTGCTCTTCTGGGTCAAATC  
CATCTGACCTAGTCTTTGGTTGCCATCACCATGCCTAAGATACCACCATTGGAGGCTAC  
AACCATCTTCTTGACGTCAAT

>1305

GCTCTGCACCAGGCCATATAAGAACATGAGCATTGCTCTTCTGGGTCAAATCCATCTGA  
CCTAGTCTTTGGTTGCCATCACCATGCCTAAGATACCACCATTGGAGGCTACAACCATC  
TTCCTTGACGTCAATCCTAAAG

>1306

GACCTAGTCTTTGGTTGCCATCACCATGCCTAAGATACCACCATTGGAGGCTACAACCA  
TCTTCTTGACGTCAATCCTAAAGGTCAGGTGTAGCTTCTCTTAGTAGCTATTTATGGCT  
GCCTTGTCAATTCACAGATTTG

>1307

GTTGCCATCACCATGCCTAAGATACCACCATTGGAGGCTACAACCATCTTCTTGACGT  
CAATCCTAAAGGTCAGGTGTAGCTTCTCTTAGTAGCTATTTATGGCTGCCTTGTCAATCA  
CAGATTTGCCAAAATCCTTTT

>1308

AACCATCTTCTTGACGTCAATCCTAAAGGTCAGGTGTAGCTTCTCTTAGTAGCTATTTA

TGGCTGCCTTGCATTACAGATTTGCCAAAATCCTTTTTGAATCCATTCCATTCCAG  
GAAGTATCCTTTTTAGGGGT

>1309

CTATTTATGGCTGCCTTGCATTACAGATTTGCCAAAATCCTTTTTGAATCCATTCCAT  
TTCCAGGAAGTATCCTTTTTAGGGGTGATGAATGACAAGTTTATAATCTCCTGGGCTCCT  
GGAAATCTGGTCTTTTGA

>1310

TTGCATTACAGATTTGCCAAAATCCTTTTTGAATCCATTCCATTCCAGGAAGTATC  
CTTTTTAGGGGTGATGAATGACAAGTTTATAATCTCCTGGGCTCCTGGAAATCTGGTCTT  
TTGGAGAGAGGTTGTTGGTT

>1311

TTTGCCAAAATCCTTTTTGAATCCATTCCATTCCAGGAAGTATCCTTTTTAGGGGTGA  
TGAATGACAAGTTTATAATCTCCTGGGCTCCTGGAAATCTGGTCTTTTGGAGAGAGGTT  
GTTGGTTGTGAAGATAGGAAG

>1312

TTTCCAGGAAGTATCCTTTTTAGGGGTGATGAATGACAAGTTTATAATCTCCTGGGCTCC  
TGGAATCTGGTCTTTTGGAGAGAGGTTGTTGGTTGTGAAGATAGGAAGATGGCAGAA  
GGCTTTGTAGTGGTGAGGCCAG

>1313

CTTTTTAGGGGTGATGAATGACAAGTTTATAATCTCCTGGGCTCCTGGAAATCTGGTCTT  
TTGGAGAGAGGTTGTTGGTTGTGAAGATAGGAAGATGGCAGAAGGCTTTGTAGTGGTG  
AGGCCAGGTCTAGACCTAGCTC

>1314

GGCTCCTGGAAATCTGGTCTTTTGGAGAGAGGTTGTTGGTTGTGAAGATAGGAAGATG  
GCAGAAGGCTTTGTAGTGGTGAGGCCAGGTCTAGACCTAGCTCTGCGTTTTTCAGCTC  
TGTCACCATTGACATCGTTTTTTT

>1315

TCCTGGAAATCTGGTCTTTTGGAGAGAGGTTGTTGGTTGTGAAGATAGGAAGATGGCA  
GAAGGCTTTGTAGTGGTGAGGCCAGGTCTAGACCTAGCTCTGCGTTTTTCAGCTCTGTC  
ACCATTGACATCGTTTTTTTCAT

>1316

GTCTTTTGGAGAGAGGTTGTTGGTTGTGAAGATAGGAAGATGGCAGAAGGCTTTGTAG  
TGGTGAGGCCAGGTCTAGACCTAGCTCTGCGTTTTTCAGCTCTGTCACCATTGACATCG  
TTTTTTTCATCGTAAGCCTTAAC

>1317

GTTGGTTGTGAAGATAGGAAGATGGCAGAAGGCTTTGTAGTGGTGAGGCCAGGTCTAG  
ACCTAGCTCTGCGTTTTTCAGCTCTGTCACCATTGACATCGTTTTTTTCATCGTAAGCCT  
TAACTTCTTCATTTTTAAACT

>1318

AAGGCTTTGTAGTGGTGAGGCCAGGTCTAGACCTAGCTCTGCGTTTTTCAGCTCTGTCA  
CCATTGACATCGTTTTTTTCATCGTAAGCCTTAACTTCTTCATTTTTAAACTAGGCACT  
TCAGTGAGCTCTTCTGGATT

>1319

TGGTGAGGCCAGGTCTAGACCTAGCTCTGCGTTTTTCAGCTCTGTCACCATTGACATCG  
TTTTTTTCATCGTAAGCCTTAACTTCTTCATTTTTAAACTAGGCACTTCAGTGAGCTCT  
TTCTGGATTGTTGCGCTCTTT

>1320

TCTGTACCATTGACATCGTTTTTTCATCGTAAGCCTTAACTTCTTCATTTTTAAACTA  
GGCACTTCAGTGAGCTCTTTCTGGATTGTTGCGCTCTTTAAAAAATTCTTTTATTCTTTG  
TGTACCCACTTATATCTTC

>1321

GTTTTTTTCATCGTAAGCCTTAACTTCTTCATTTTTAAACTAGGCACTTCAGTGAGCTC  
TTTCTGGATTGTTGCGCTCTTTAAAAAATTCTTTTATTCTTTGTGTACCCACTTATATCTT  
CATGAAGTCCTTTTGGTTA

>1322

TTTTAAACTAGGCACTTCAGTGAGCTCTTTCTGGATTGTTGCGCTCTTTAAAAAATTC  
TTTTATTCTTTGTGTACCCACTTATATCTTCATGAAGTCCTTTTGGTTAATTGAATTTTGC  
TGTTTTGGAATCTGGATTGG

>1323

CTCTTTCTGGATTGTTGCGCTCTTTAAAAAATTCTTTTATTCTTTGTGTACCCACTTATAT  
CTTCATGAAGTCCTTTTGGTTAATTGAATTTGCTGTTTTGGAATCTGGATTGGCAGTTC  
AGCCAGTTAAGTAGGGGGT

>1324

GATTGTTGCGCTCTTTAAAAAATTCTTTTATTCTTTGTGTACCCACTTATATCTTCATGAA  
GTCCTTTTGGTTAATTGAATTTGCTGTTTTGGAATCTGGATTGGCAGTTCAGCCAGTTA  
AGTAGGGGGTCAGTTTGAT

>1325

AAAAATTCTTTTATTCTTTGTGTACCCACTTATATCTTCATGAAGTCCTTTTGGTTAATTG  
AATTTTGTGTTTTGGAATCTGGATTGGCAGTTCAGCCAGTTAAGTAGGGGGTCAGTTT  
GATTTGATTCTGTGTGTTCT

>1326

GTACCCACTTATATCTTCATGAAGTCCTTTTGGTTAATTGAATTTGCTGTTTTGGAATCT  
GGATTGGCAGTTCAGCCAGTTAAGTAGGGGGTCAGTTTGATTGATTCTGTGTGTTCTG  
ACTTTTTTTTTTTTTTAAA

>1327

TATATCTTCATGAAGTCCTTTTGGTTAATTGAATTTGCTGTTTTGGAATCTGGATTGGCA  
GTTGAGCCAGTTAAGTAGGGGGTCAGTTTGATTGATTCTGTGTGTTCTGACTTTTTTTTT  
TTTTTTTAAATACTTTAAC

>1328

CTTCATGAAGTCCTTTTGGTTAATTGAATTTGCTGTTTTGGAATCTGGATTGGCAGTTC  
AGCCAGTTAAGTAGGGGGTCAGTTTGATTGATTCTGTGTGTTCTGACTTTTTTTTTTTTT  
TTAAATACTTTAACCTGCT

>1329

AATTTTGTGTTTTGGAATCTGGATTGGCAGTTCAGCCAGTTAAGTAGGGGGTCAGTTT  
GATTTGATTCTGTGTGTTCTGACTTTTTTTTTTTTTTTTAAATACTTTAACCTGCTTAGGGT  
TACTGAGCCATCTGGGATCT

>1330

GGGGTCAGTTTGATTGATTCTGTGTGTTCTGACTTTTTTTTTTTTTTTTAAATACTTTAAC  
CTGCTTAGGGTTACTGAGCCATCTGGGATCTAGACTGAACTCTGGAACCTTTGAAGAT  
GATTTCTTTATTTTATTTT

>1331

TCTGGGATCTAGACTGAACTCTTGGAACTTTTGAAGATGATTTCTTTATTTTATTTTCA



ATGGAGGAAAGTTGCCACTCTTTCATCTCAGTGAGAAGTCCCATTTAATTTGCCATC  
ACTATTGGATGGAGCCGCTAA

>1332

TTGGAACTTTTGAAGATGATTTCTTTATTTTATTTTCAATGGAGGAAAGTTGCCACTC  
TTTCATCTCAGTGAGAAGTCCCATTTAATTTGCCATCACTATTGGATGGAGCCGCTAAT  
TGCTGGGAGGGAGAAAGCTA

>1333

TTTTGAAGATGATTTCTTTATTTTATTTTCAATGGAGGAAAGTTGCCACTCTTTCATC  
TCAGTGAGAAGTCCCATTTAATTTGCCATCACTATTGGATGGAGCCGCTAATTGCTGG  
GAGGGAGAAAGCTATAGTTTA

>1334

GAGAAGTCCCATTTAATTTGCCATCACTATTGGATGGAGCCGCTAATTGCTGGGAGGG  
AGAAAGCTATAGTTTAGCAACATGTTTTCTCCTGCTCGTTCTAGGAAAACCTATTATGAA  
TCTTTAAAATAGTGATTATCC

>1335

TTTAATTTGCCATCACTATTGGATGGAGCCGCTAATTGCTGGGAGGGAGAAAGCTATAG  
TTTAGCAACATGTTTTCTCCTGCTCGTTCTAGGAAAACCTATTATGAATCTTTAAAATAG  
TGATTATCCTAAACTGTAAA

>1336

GAAAGCTATAGTTTAGCAACATGTTTTCTCCTGCTCGTTCTAGGAAAACCTATTATGAAT  
CTTTAAAATAGTGATTATCCTAAACTGTAAAATCAAATTCTATTACAGCTCTTTGATTT  
CTTGCTAATTCAGGAGAGA

>1337

CAACATGTTTTCTCCTGCTCGTTCTAGGAAAACCTATTATGAATCTTTAAAATAGTGATT  
ATCCTAAACTGTAAAATCAAATTCTATTACAGCTCTTTGATTTCTTGCTAATTCAGGA  
GAGAAACTTTTCCAATCACT

>1338

CAGGAGAGAAACTTTTCCAATCACTTTAATTTTTTTTATTAATTTAAAGCAAGCCCTGCT  
GAAAGCCCAAGTATATGACTTAGAGTCTTACTAAATGAATACAGGTGTGCCTCAGTT  
TGCCATTGGAGGGTTTCTGA

>1339

CCAATCACTTTAATTTTTTTTATTAATTTAAAGCAAGCCCTGCTGAAAGCCCAAGTATAT  
ATGACTTAGAGTCTTACTAAATGAATACAGGTGTGCCTCAGTTTGTCCATTGGAGGGTT  
TCTGAATTTCCATAACTAAA

>1340

TATTAATTTAAAGCAAGCCCTGCTGAAAGCCCAAGTATATGACTTAGAGTCTTACTAA  
ATGAATACAGGTGTGCCTCAGTTTGTCCATTGGAGGGTTTCTGAATTTCCATAACTAA  
AGATTTTCTATTCTGTTTTGG

>1341

TTAATTTAAAGCAAGCCCTGCTGAAAGCCCAAGTATATGACTTAGAGTCTTACTAAAT  
GAATACAGGTGTGCCTCAGTTTGTCCATTGGAGGGTTTCTGAATTTCCATAACTAAAG  
ATTTTCTATTCTGTTTTGGCT

>1342

AAGCCCAAGTATATGACTTAGAGTCTTACTAAATGAATACAGGTGTGCCTCAGTTTGT  
CCATTGGAGGGTTTCTGAATTTCCATAACTAAAGATTTTCTATTCTGTTTTGGCTGGGT  
GTGTGGGGTGAAAGCTCTTA

>1343

AATACAGGTGTGCCTCAGTTTGTCCATTGGAGGGTTTCTGAATTTCCATAACTAAAGA  
TTTTCTATTCTGTTTTGGCTGGGTGTGTGGGGTGAAAGCTCTTACTCTCTGGCAGTTATT  
TAAGTAGTAAGAAATTTGCTA

>1344

GCCTCAGTTTGTCCATTGGAGGGTTTCTGAATTTCCATAACTAAAGATTTTCTATTCTG  
TTTTGGCTGGGTGTGTGGGGTGAAAGCTCTTACTCTCTGGCAGTTATTTAAGTAGTAAG  
AAATTTGCTACAACCTCTCCC

>1345

TTTCCATAACTAAAGATTTTCTATTCTGTTTTGGCTGGGTGTGTGGGGTGAAAGCTCTTA  
CTCTCTGGCAGTTATTTAAGTAGTAAGAAATTTGCTACAACCTCTCCCCACCCCCACGT  
TTTACAGATAGGAAATGAGCA

>1346

CTAAAGATTTTCTATTCTGTTTTGGCTGGGTGTGTGGGGTGAAAGCTCTTACTCTCTGG  
CAGTTATTTAAGTAGTAAGAAATTTGCTACAACCTCTCCCCACCCCCACGTTTACAGAT  
AGGAAATGAGCACTTTGACTG

>1347

AAGATTTTCTATTCTGTTTTGGCTGGGTGTGTGGGGTGAAAGCTCTTACTCTCTGGCAG  
TTATTTAAGTAGTAAGAAATTTGCTACAACCTCTCCCCACCCCCACGTTTACAGATAGG  
AAATGAGCACTTTGACTGTCC

>1348

GTGAAAGCTCTTACTCTCTGGCAGTTATTTAAGTAGTAAGAAATTTGCTACAACCTCTC  
CCCACCCCCACGTTTACAGATAGGAAATGAGCACTTTGACTGTCCAGGTCAGACTTC  
TGATTTTGCTACTTACTAAGT

>1349

AGTAGTAAGAAATTTGCTACAACCTCTCCCCACCCCCACGTTTACAGATAGGAAATGA  
GCACTTTGACTGTCCAGGTCAGACTTCTGATTTTGCTACTTACTAAGTGTGACAGTGGT  
TGTGTTACTTAACTTCTGTGTG

>1350

AAGAAATTTGCTACAACCTCTCCCCACCCCCACGTTTACAGATAGGAAATGAGCACTT  
TGACTGTCCAGGTCAGACTTCTGATTTTGCTACTTACTAAGTGTGACAGTGGTTGTGT  
ACTTAACTTCTGTGTGCCTGTT

>1351

ACGTTTTACAGATAGGAAATGAGCACTTTGACTGTCCAGGTCAGACTTCTGATTTTGCT  
ACTTACTAAGTGTGACAGTGGTTGTGTTACTTAACTTCTGTGTGCCTGTTTGCTCATTG  
TGAAACAGAAATAATAGTAGT

>1352

AGATAGGAAATGAGCACTTTGACTGTCCAGGTCAGACTTCTGATTTTGCTACTTACTAA  
CTGTGACAGTGGTTGTGTTACTTAACTTCTGTGTGCCTGTTTGCTCATTGTGAAACAG  
AAATAATAGTAGTACCTACTTC

>1353

TAGGAAATGAGCACTTTGACTGTCCAGGTCAGACTTCTGATTTTGCTACTTACTAAGT  
TGACAGTGGTTGTGTTACTTAACTTCTGTGTGCCTGTTTGCTCATTGTGAAACAGAAA  
TAATAGTAGTACCTACTTCATT

>1354

TGACTGTCCAGGTCAGACTTCTGATTTTGCTACTTACTAAGTGTGACAGTGGTTGTGT

ACTTAACTTCTGTGTGCCTGTTTGCTCATTGTGAAACAGAAATAATAGTAGTACCTACT  
TCATTGGGTTGTTATAAGGAT

>1355

CTGATTTTGCTACTTACTAACTGTGACAGTGGTTGTGTTACTTAACTTCTGTGTGCCTGT  
TTGCTCATTGTGAAACAGAAATAATAGTAGTACCTACTTCATTGGGTTGTTATAAGGAT  
TCATCAGAAAATATTTATCC

>1356

CTGTGACAGTGGTTGTGTTACTTAACTTCTGTGTGCCTGTTTGCTCATTGTGAAACAG  
AAATAATAGTAGTACCTACTTCATTGGGTTGTTATAAGGATTCATCAGAAAATATTTATCC  
TGTGTGAGGAACGGTGGCAC

>1357

GTTACTTAACTTCTGTGTGCCTGTTTGCTCATTGTGAAACAGAAATAATAGTAGTACCT  
ACTTCATTGGGTTGTTATAAGGATTCATCAGAAAATATTTATCCTGTGTGAGGAACGGTG  
GCACATAGTAAGTGCTCCAT

>1358

ACTTAACTTCTGTGTGCCTGTTTGCTCATTGTGAAACAGAAATAATAGTAGTACCTACT  
TCATTGGGTTGTTATAAGGATTCATCAGAAAATATTTATCCTGTGTGAGGAACGGTGGC  
ACATAGTAAGTGCTCCATAAG

>1359

TGAAACAGAAATAATAGTAGTACCTACTTCATTGGGTTGTTATAAGGATTCATCAGAAA  
ATATTTATCCTGTGTGAGGAACGGTGGCACATAGTAAGTGCTCCATAAGTGTGTTGCTAG  
GGTATTTTTCTTGTGATTGTGT

>1360

AATAGTAGTACCTACTTCATTGGGTTGTTATAAGGATTCATCAGAAAATATTTATCCTGTG  
TGAGGAACGGTGGCACATAGTAAGTGCTCCATAAGTGTGTTGCTAGGGTATTTTTCTTGT  
CATTGTGTGAAGTAGGTCAT

>1361

CCTACTTCATTGGGTTGTTATAAGGATTCATCAGAAAATATTTATCCTGTGTGAGGAACG  
GTGGCACATAGTAAGTGCTCCATAAGTGTGTTGCTAGGGTATTTTTCTTGTGATTGTGTGA  
AGTAGGTCATGCTAGCCATG

>1362

TGTTATAAGGATTCATCAGAAAATATTTATCCTGTGTGAGGAACGGTGGCACATAGTAA  
GTGCTCCATAAGTGTGTTGCTAGGGTATTTTTCTTGTGATTGTGTGAAGTAGGTCATGCTA  
GCCATGCAGGGTGAAAAATGT

>1363

TATTTATCCTGTGTGAGGAACGGTGGCACATAGTAAGTGCTCCATAAGTGTGTTGCTAGG  
GTATTTTTCTTGTGATTGTGTGAAGTAGGTCATGCTAGCCATGCAGGGTGAAAAATGTG  
TTCATGTTGGTCCAGATCCTGC

>1364

CTGTGTGAGGAACGGTGGCACATAGTAAGTGCTCCATAAGTGTGTTGCTAGGGTATTTTT  
CTTGTGATTGTGTGAAGTAGGTCATGCTAGCCATGCAGGGTGAAAAATGTGTTTCATGTT  
GGTCCAGATCCTGCTTTCTCCC

>1365

TGAGGAACGGTGGCACATAGTAAGTGCTCCATAAGTGTGTTGCTAGGGTATTTTTCTTGT  
CATTGTGTGAAGTAGGTCATGCTAGCCATGCAGGGTGAAAAATGTGTTTCATGTTGGTCC  
AGATCCTGCTTTCTCCCTGAGA

>1366

GAACGGTGGCACATAGTAAGTGCTCCATAAGTGTGGCTAGGGTATTTTTCTTGTCATTG  
TGTGAAGTAGGTCATGCTAGCCATGCAGGGTGAAAAATGTGTTTCATGTTGGTCCAGATC  
CTGCTTTCTCCCTGAGACCGT

>1367

GTGCTCCATAAGTGTGGCTAGGGTATTTTTCTTGTCATTGTGTGAAGTAGGTCATGCTA  
GCCATGCAGGGTGAAAAATGTGTTTCATGTTGGTCCAGATCCTGCTTTCTCCCTGAGACC  
GTTCTTCCGCATAGGCGTCAA

>1368

GGGTATTTTTCTTGTCATTGTGTGAAGTAGGTCATGCTAGCCATGCAGGGTGAAAAATG  
TGTTCATGTTGGTCCAGATCCTGCTTTCTCCCTGAGACCGTTCTTCCGCATAGGCGTCA  
ATCCGTACAGTGCTGTAAAAC

>1369

AGGTCATGCTAGCCATGCAGGGTGAAAAATGTGTTTCATGTTGGTCCAGATCCTGCTTTC  
TCCCTGAGACCGTTCTTCCGCATAGGCGTCAATCCGTACAGTGCTGTAAAAC

>1370

GCAGGGTGAAAAATGTGTTTCATGTTGGTCCAGATCCTGCTTTCTCCCTGAGACCGTTCT  
TCCGCATAGGCGTCAATCCGTACAGTGCTGTAAAAC

>1371

CCTGAGACCGTTCTTCCGCATAGGCGTCAATCCGTACAGTGCTGTAAAAC

>1372

TCAATCCGTACAGTGCTGTAAAAC

>1373

TGCTGCCTCGGGCACCTCATGTTGGGGCTGAGACATTGCTTCTGCGTCTTCCCAGAA  
GCTGATCTTGTACTGTGGTGGCCAGGGTACTCTTGTCCCATTGACCTGAGGCCTGG  
TGAGTCATTCCAGTTCTCGTTT

>1374

CCTCGGGCACCTCATGTTGGGGCTGAGACATTGCTTCTGCGTCTTCCCAGAA  
TCTTGTACTGTGGTGGCCAGGGTACTCTTGTCCCATTGACCTGAGGCCTGGT  
CATTCCAGTTCTCGTTTAAATT

>1375

CATGTTTGGGGCTGAGACATTGCTTCTGCGTCTTCCCAGAA  
TGGTGGCCAGGGTACTCTTGTCCCATTGACCTGAGGCCTGGT  
CGTTTAAATTTAGCCGGGCAGC

>1376

TCTTCCCAGAAAGCTGATCTTGTACTGTGGTGGCCAGGGTACTCTTGTCCCATTGA  
CCTGAGGCCTGGT  
GCCATCGGGTCCAATGCCGGG

>1377

CTGATCTTGTACTGTGGTGGCCAGGGTACTCTTGTCCCATTGACCTGAGGCCTGGT

GAGTCATTCCAGTTCTCGTTAAATTTAGCCGGGCAGCGCTCCACTGCCATCGGGTCCA  
AATGCCGGGGAGGCTCACTGAT

>1378

TCTTGTACTGTGGTGGCCAGGGTACTCTTTGTCCATTGACCTGAGGCCTGGTGAGTCA  
TTCCAGTTCTCGTTAAATTTAGCCGGGCAGCGCTCCACTGCCATCGGGTCCAAATGCC  
GGGGAGGCTCACTGATGCGGTG

>1379

TGACCTGAGGCCTGGTGAGTCATTCCAGTTCTCGTTAAATTTAGCCGGGCAGCGCTCC  
ACTGCCATCGGGTCCAAATGCCGGGGAGGCTCACTGATGCGGTGCCTGTTGCCTGTG  
CACGTGGCCAGGCGTGCACATCA

>1380

CTCGTTAAATTTAGCCGGGCAGCGCTCCACTGCCATCGGGTCCAAATGCCGGGGAGG  
CTCACTGATGCGGTGCCTGTTGCCTGTGCACGTGGCCAGGCGTGCACATCACTGTGC  
TTATGAGAGAGATGAAGAGCACAG

>1381

CGTTTAAATTTAGCCGGGCAGCGCTCCACTGCCATCGGGTCCAAATGCCGGGGAGGCT  
CACTGATGCGGTGCCTGTTGCCTGTGCACGTGGCCAGGCGTGCACATCACTGTGCTTA  
TGAGAGAGATGAAGAGCACAGAT

>1382

CTGCCATCGGGTCCAAATGCCGGGGAGGCTCACTGATGCGGTGCCTGTTGCCTGTGC  
ACGTGGCCAGGCGTGCACATCACTGTGCTTATGAGAGAGATGAAGAGCACAGATACCA  
CCTTACTGATGGGGGCTCCTGGGGC

>1383

CCAAATGCCGGGGAGGCTCACTGATGCGGTGCCTGTTGCCTGTGCACGTGGCCAGGC  
GTGCACATCACTGTGCTTATGAGAGAGATGAAGAGCACAGATACCACCTTACTGATGG  
GGGCTCCTGGGGCTGGGCTTGTGGG

>1384

GTGGCCAGGCGTGCACATCACTGTGCTTATGAGAGAGATGAAGAGCACAGATACCACC  
TACTGATGGGGGCTCCTGGGGCTGGGCTTGTGGGTGTTGGGGGTTCCAGAGCTCCTTC  
CCTTCTGCCTGTCAGTGCAGGA

>1385

TCACTGTGCTTATGAGAGAGATGAAGAGCACAGATACCACCTTACTGATGGGGGTCCT  
GGGGCTGGGCTTGTGGGTGTTGGGGGTTCCAGAGCTCCTCCCTTCTGCCTGTGAG  
TGCAGGATGCTTCTAAAATGTGGA

>1386

TGTGCTTATGAGAGAGATGAAGAGCACAGATACCACCTTACTGATGGGGGTCCTGGGG  
CTGGGCTTGTGGGTGTTGGGGTTCAGAGCTCCTCCCTTCTGCCTGTCAGTGCA  
GGATGCTTCTAAAATGTGGACTCA

>1387

TACTGATGGGGGCTCCTGGGGCTGGGCTTGTGGGTGTTGGGGGTTCCAGAGCTCCTTC  
CCTTCTGCCTGTCAGTGCAGGATGCTTCTAAAATGTGGACTCAGCAGACATTGTTTT  
GAGTGCTTGCTACATGTCAGATT

>1388

GGCTTGTGGGTGTTGGGGGTTCCAGAGCTCCTCCCTTCTGCCTGTCAGTGCAGGA  
TGCTTCTAAAATGTGGACTCAGCAGACATTGTTTTGAGTGCTGCTACATGTCAGATTC  
TGTGCTAAGTCACTCACAGCCA

>1389

GTTCCAGAGCTCCTTCCCTTCTCCTGCCTGTCAGTGCAGGATGCTTCTAAAATGTGGACT  
CAGCAGACATTGTTTTGAGTGCTTGCTACATGTCAGATTCTGTGCTAAGTGCCTCACA  
GCCAGCATCTCTGTAAGACCTC

>1390

TCCTGCCTGTCAGTGCAGGATGCTTCTAAAATGTGGACTCAGCAGACATTGTTTTGAGT  
GCTTGCTACATGTCAGATTCTGTGCTAAGTGCCTCACAGCCAGCATCTCTGTAAGACC  
TCTAGCTGTCCTGTAAGGTGGG

>1391

CAGTGCAGGATGCTTCTAAAATGTGGACTCAGCAGACATTGTTTTGAGTGCTTGCTACA  
TGTCAGATTCTGTGCTAAGTGCCTCACAGCCAGCATCTCTGTAAGACCTCTAGCTGTC  
CTGTAAGGTGGGTATCAGTTTC

>1392

GGATGCTTCTAAAATGTGGACTCAGCAGACATTGTTTTGAGTGCTTGCTACATGTCAGA  
TTCTGTGCTAAGTGCCTCACAGCCAGCATCTCTGTAAGACCTCTAGCTGTCCTGTAAG  
GTGGGTATCAGTTTCACATTCT

>1393

AGCAGACATTGTTTTGAGTGCTTGCTACATGTCAGATTCTGTGCTAAGTGCCTCACAG  
CCAGCATCTCTGTAAGACCTCTAGCTGTCCTGTAAGGTGGGTATCAGTTTCACATTCTC  
AGATGGGCGGAGAGAAGCCCAA

>1394

GAGTGCTTGCTACATGTCAGATTCTGTGCTAAGTGCCTCACAGCCAGCATCTCTGTAA  
GACCTCTAGCTGTCCTGTAAGGTGGGTATCAGTTTCACATTCTCAGATGGGCGGAGAG  
AAGCCCAAGAGGTTAGTGGACTT

>1395

TGTCAGATTCTGTGCTAAGTGCCTCACAGCCAGCATCTCTGTAAGACCTCTAGCTGTC  
CTGTAAGGTGGGTATCAGTTTCACATTCTCAGATGGGCGGAGAGAAGCCCAAGAGGTT  
AGTGGACTTTTCTCTAGTAAAGA

>1396

ATTCTGTGCTAAGTGCCTCACAGCCAGCATCTCTGTAAGACCTCTAGCTGTCCTGTAA  
GGTGGGTATCAGTTTCACATTCTCAGATGGGCGGAGAGAAGCCCAAGAGGTTAGTGGA  
CTTTTCTCTAGTAAAGAGTTGTA

>1397

AGACCTCTAGCTGTCCTGTAAGGTGGGTATCAGTTTCACATTCTCAGATGGGCGGAGA  
GAAGCCCAAGAGGTTAGTGGACTTTTCTCTAGTAAAGAGTTGTACAGGCCGGGCGCAG  
TGGCTCATGCCTGTAATCCCAGCA

>1398

AAGGTGGGTATCAGTTTCACATTCTCAGATGGGCGGAGAGAAGCCCAAGAGGTTAGTG  
GACTTTTCTCTAGTAAAGAGTTGTACAGGCCGGGCGCAGTGGCTCATGCCTGTAATCCC  
AGCACTTTGGGAGGCCGAGGCGG

>1399

GTATCAGTTTCACATTCTCAGATGGGCGGAGAGAAGCCCAAGAGGTTAGTGGACTTTT  
CTCTAGTAAAGAGTTGTACAGGCCGGGCGCAGTGGCTCATGCCTGTAATCCCAGCACT  
TTGGGAGGCCGAGGCGGGCGGATC

>1400

AGATGGGCGGAGAGAAGCCCAAGAGGTTAGTGGACTTTTCTCTAGTAAAGAGTTGTAC

AGGCCGGGCGCAGTGGCTCATGCCTGTAATCCCAGCACTTTGGGAGGCCGAGGCGGG  
CGGATCACGAGGTCAGGAGATCGAG

>1401

ACAGGCCGGGCGCAGTGGCTCATGCCTGTAATCCCAGCACTTTGGGAGGCCGAGGCG  
GGCGGATCACGAGGTCAGGAGATCGAGACCATCCTGGCTAACACAGTGAAACCCCGT  
CTCTACTAAAAATACAAAAAATTAGC

>1402

CCCAGCACTTTGGGAGGCCGAGGCGGGCGGATCACGAGGTCAGGAGATCGAGACCAT  
CCTGGCTAACACAGTGAAACCCCGTCTCTACTAAAAATACAAAAAATTAGCCGGGCGT  
GGTGGGGGGCGCCTGTAGTCCCAGC

>1403

TGGGAGGCCGAGGCGGGCGGATCACGAGGTCAGGAGATCGAGACCATCCTGGCTAAC  
ACAGTGAAACCCCGTCTCTACTAAAAATACAAAAAATTAGCCGGGCGTGGTGGGGGGC  
GCCTGTAGTCCCAGCTACTCGGGAG

>1404

GAGATCGAGACCATCCTGGCTAACACAGTGAAACCCCGTCTCTACTAAAAATACAAAA  
AATTAGCCGGGCGTGGTGGGGGGCGCCTGTAGTCCCAGCTACTCGGGAGGCTGAGGC  
AGGAGAATGGCGTGAACCCGGGAGG

>1405

TGGCTAACACAGTGAAACCCCGTCTCTACTAAAAATACAAAAAATTAGCCGGGCGTGG  
TGGGGGGCGCCTGTAGTCCCAGCTACTCGGGAGGCTGAGGCAGGAGAATGGCGTGAA  
CCCGGGAGGCAGAGCTTGCAGTGAG

>1406

AAAATTAGCCGGGCGTGGTGGGGGGCGCCTGTAGTCCCAGCTACTCGGGAGGCTGAG  
GCAGGAGAATGGCGTGAACCCGGGAGGCAGAGCTTGCAGTGAGCCGAGATCATGCCA  
CTCACTACACTCCAGCCTGGGCAAAG

>1407

CGCCTGTAGTCCCAGCTACTCGGGAGGCTGAGGCAGGAGAATGGCGTGAACCCGGGA  
GGCAGAGCTTGCAGTGAGCCGAGATCATGCCACTCACTACACTCCAGCCTGGGCAAA  
GGAGTGAGACTGTCTCAAAAAAAAAA

>1408

GAACCCGGGAGGCAGAGCTTGCAGTGAGCCGAGATCATGCCACTCACTACACTCCAG  
CCTGGGCAAAGGAGTGAGACTGTCTCAAAAAAAAAAAAAAAAAAAAAAAAAAAGAGTTGTAC  
CAGGATTTATGTTTCAGGTCTTCTGGCT

>1409

GAGGCAGAGCTTGCAGTGAGCCGAGATCATGCCACTCACTACACTCCAGCCTGGGCA  
AAGGAGTGAGACTGTCTCAAAAAAAAAAAAAAAAAAAAAAAAAAAGAGTTGTACCAGGATTTA  
TGTTTCAGGTCTTCTGGCTCCATGCTC

>1410

ATGCCACTCACTACACTCCAGCCTGGGCAAAGGAGTGAGACTGTCTCAAAAAAAAAA  
AAAAAAAAAAGAGTTGTACCAGGATTTATGTTTCAGGTCTTCTGGCTCCATGCTCTCTG  
CAGCTGGGTGACCAGGGGGCTCAT

>1411

CCACTCACTACACTCCAGCCTGGGCAAAGGAGTGAGACTGTCTCAAAAAAAAAA  
AAAAAAAAAAGAGTTGTACCAGGATTTATGTTTCAGGTCTTCTGGCTCCATGCTCTCTGCAG  
CTGGGTGACCAGGGGGCTCATGGC

>1412

AAAAAAAAAAAAAAAAAGAGTTGTACCAGGATTTATGTTACAGTCTTCTGGCTCCATGCT  
CTCTGCAGCTGGGTGACCAGGGGGCTCATGGCTTACCAGCTCTGGCCTCCTCAGTTC  
CTCTGGTGGCTTCTTGCAGGAGG

>1413

CCATGCTCTCTGCAGCTGGGTGACCAGGGGGCTCATGGCTTACCAGCTCTGGCCTCC  
TCAGTTCTCTGGTGGCTTCTTGCAGGAGGAAGGTTACTGCAGAGGGTTCAGCTCTT  
TAGGGGCCAGGCCGCATGGATCC

>1414

ACCAGGGGGCTCATGGCTTACCAGCTCTGGCCTCCTCAGTTCCTCTGGTGGCTTCTTG  
CGAGGAGGAAGGTTACTGCAGAGGGTTCAGCTCTTAGGGGCCAGGCCGCATGGAT  
CCAAGGACTAGTACGTCATCTCTT

>1415

TGGCTTACCAGCTCTGGCCTCCTCAGTTCCTCTGGTGGCTTCTTGCAGGAGGAAGG  
TACTGCAGAGGGTTCAGCTCTTAGGGGCCAGGCCGCATGGATCCAAGGACTAGTA  
CGTCATCTTTACCAACACAGAGA

>1416

TTGCGAGGAGGAAGGTTACTGCAGAGGGTTCAGCTCTTAGGGGCCAGGCCGCATG  
GATCCAAGGACTAGTACGTCATCTTTACCAACACAGAGAGATCAGCTTCTAGTGATAG  
AGGCCTTTTATGCTGACTTGAAAA

>1417

GAGGAGGAAGGTTACTGCAGAGGGTTCAGCTCTTAGGGGCCAGGCCGCATGGATC  
CAAGGACTAGTACGTCATCTTTACCAACACAGAGAGATCAGCTTCTAGTGATAGAGG  
CCTTTTATGCTGACTTGAAAAACAG

>1418

AGGGGCCAGGCCGCATGGATCCAAGGACTAGTACGTCATCTTTACCAACACAGAGA  
GATCAGCTTCTAGTGATAGAGGCCTTTTATGCTGACTTGAAAAACAGAAAAAGAGAGA  
AAAAAGAAACCCATTTACAAAAAT

>1419

TTATGCTGACTTGAAAAACAGAAAAAGAGAGAAAAAGAAACCCATTTACAAAAATA  
AAAATCCCATGCTGTTAATTTTCATGCCAGCATAATCAGAAATCCCCTTTCTACTGTTTC  
CCCTTAAAGCCCCGGTGCCTT

>1420

CCATTTACAAAAATAAAAAATCCCATGCTGTTAATTTTCATGCCAGCATAATCAGAAATCC  
CCTTTCTACTGTTTCCCCTTAAAGCCCCGGTGCCTTATTATGCTGGTGCAGTCTGGAA  
AACTATGGTTGGGTTTTGC

>1421

CCCATGCTGTTAATTTTCATGCCAGCATAATCAGAAATCCCCTTTCTACTGTTTCCCCTT  
AAAAGCCCCGGTGCCTTATTATGCTGGTGCAGTCTGGAAAACTATGGTTGGGTTTTG  
CCTACGTGAGGCTTATCTCTG

>1422

ATGCCAGCATAATCAGAAATCCCCTTTCTACTGTTTCCCCTTAAAGCCCCGGTGCCT  
TATTATGCTGGTGCAGTCTGGAAAACTATGGTTGGGTTTTGCCTACGTGAGGCTTATCT  
CTGCAGCTGCAAGGAGGGGA

>1423

CCCCTTTCTACTGTTTCCCCTTAAAGCCCCGGTGCCTTATTATGCTGGTGCAGTCTGG



AAAACTATGGTTGGGTTTTGCCTACGTGAGGCTTATCTCTGCAGCTGCAAGGAGGGG  
ATCCGGTACTTTATTGTCAGCA

>1424

TTCTACTGTTTCCCCTTAAAAGCCCCGGTGCCTTATTATGCTGGTGCAGTCTGGAAAA  
ACTATGGTTGGGTTTTGCCTACGTGAGGCTTATCTCTGCAGCTGCAAGGAGGGGATCCG  
GTACTTTATTGTCAGCATGGAA

>1425

CCCCTTAAAAGCCCCGGTGCCTTATTATGCTGGTGCAGTCTGGAAAACTATGGTTGG  
GTTTTGCCTACGTGAGGCTTATCTCTGCAGCTGCAAGGAGGGGATCCGGTACTTTATTG  
TCAGCATGGAACTTCCGCTAA

>1426

AGTCTGGAAAACTATGGTTGGGTTTTGCCTACGTGAGGCTTATCTCTGCAGCTGCAAG  
GAGGGGATCCGGTACTTTATTGTCAGCATGGAACTTCCGCTAAATACTTAGAAAAACC  
TTAATTCTAAATTCCTAGCTCA

>1427

AACTATGGTTGGGTTTTGCCTACGTGAGGCTTATCTCTGCAGCTGCAAGGAGGGGATCC  
GGTACTTTATTGTCAGCATGGAACTTCCGCTAAATACTTAGAAAAACCTTAATTCTAAA  
TTCCTAGCTCACTTCAACTG

>1428

TGTCAGCATGGAACTTCCGCTAAATACTTAGAAAAACCTTAATTCTAAATTCCTAGCT  
CACTTTCAACTGTGCCTCGGGACCTGATTTTCTCGGTGTGAACAGATTGTGTTTCAGC  
ATTGCAGTAGAAAGGGTCCAAG

>1429

TCAGCATGGAACTTCCGCTAAATACTTAGAAAAACCTTAATTCTAAATTCCTAGCTCA  
CTTTCAACTGTGCCTCGGGACCTGATTTTCTCGGTGTGAACAGATTGTGTTTCAGCAT  
TGCAGTAGAAAGGGTCCAAGTT

>1430

ACTTAGAAAAACCTTAATTCTAAATTCCTAGCTCACTTTCAACTGTGCCTCGGGACCT  
GATTTTCTCGGTGTGAACAGATTGTGTTTCAGCATTGCAGTAGAAAGGGTCCAAGTTA  
GGTAAGAGAAAGGACTTCTGAG

>1431

TTAATTCTAAATTCCTAGCTCACTTTCAACTGTGCCTCGGGACCTGATTTTCTCGGTG  
TGAACAGATTGTGTTTCAGCATTGCAGTAGAAAGGGTCCAAGTTAGGTAAGAGAAAGG  
ACTTCTGAGACACTGGGGTGTT

>1432

AATTCTAAATTCCTAGCTCACTTTCAACTGTGCCTCGGGACCTGATTTTCTCGGTGTG  
AACAGATTGTGTTTCAGCATTGCAGTAGAAAGGGTCCAAGTTAGGTAAGAGAAAGGAC  
TTCCTGAGACACTGGGGTGTTAC

>1433

TAGCTCACTTTCAACTGTGCCTCGGGACCTGATTTTCTCGGTGTGAACAGATTGTGT  
TCAGCATTGCAGTAGAAAGGGTCCAAGTTAGGTAAGAGAAAGGACTTCTGAGACAC  
TGGGGTGTTACTGAGAAAGTTGTT

>1434

TTCAACTGTGCCTCGGGACCTGATTTTCTCGGTGTGAACAGATTGTGTTTCAGCATTG  
CAGTAGAAAGGGTCCAAGTTAGGTAAGAGAAAGGACTTCTGAGACACTGGGGTGTT  
ACTGAGAAAGTTGTTAGAAGACTG

>1435

AGATTGTGTTTCAGCATTGCAGTAGAAAGGGTCCAAGTTAGGTAAGAGAAAGGACTTCC  
TGAGACACTGGGGTGTACTGAGAAAGTTGTTAGAAGACTGTCACAGACATTTTGATG  
AAGGGGGGACATTCTGGGCCATTT

>1436

ATTGTGTTTCAGCATTGCAGTAGAAAGGGTCCAAGTTAGGTAAGAGAAAGGACTTCCTG  
AGACACTGGGGTGTACTGAGAAAGTTGTTAGAAGACTGTCACAGACATTTTGATGAA  
GGGGGGACATTCTGGGCCATTTGA

>1437

ATTGCAGTAGAAAGGGTCCAAGTTAGGTAAGAGAAAGGACTTCCTGAGACACTGGGG  
TGTTACTGAGAAAGTTGTTAGAAGACTGTCACAGACATTTTGATGAAGGGGGGACATT  
CTGGGCCATTTGAAGTGGTTTTTAG

>1438

TTACTGAGAAAGTTGTTAGAAGACTGTCACAGACATTTTGATGAAGGGGGGACATTCT  
GGGCCATTTGAAGTGGTTTTTAGAGTTCTTCTCTTTAGGGCCATTTCGGTCCCCCAG  
AAATAAGAAGAAAAGACATATAC

>1439

CTGAGAAAGTTGTTAGAAGACTGTCACAGACATTTTGATGAAGGGGGGACATTCTGGG  
CCATTTGAAGTGGTTTTTAGAGTTCTTCTCTTTAGGGCCATTTCGGTCCCCCAGAAAT  
AAGAAGAAAAGACATATACACG

>1440

TTGATGAAGGGGGGACATTCTGGGCCATTTGAAGTGGTTTTTAGAGTTCTTCTCTTT  
AGGGCCATTTCGGTCCCCCAGAAATAAGAAGAAAAGACATATACACGCACATAAACCA  
CCACCACCAGGCTTGCTGAGAAC

>1441

TCCCCCAGAAATAAGAAGAAAAGACATATACACGCACATAAACACCACCACCAGGCT  
TGCTGAGAACAAGTCAAATGTGCCACCAAACCATCGTCTTAGTGGGAGATGGGGTGGC  
ACTGCAGGGGCAGAAAGACTGACG

>1442

GAAATAAGAAGAAAAGACATATACACGCACATAAACACCACCACCAGGCTTGCTGAG  
AACAAGTCAAATGTGCCACCAAACCATCGTCTTAGTGGGAGATGGGGTGGCACTGCAG  
GGGCAGAAAGACTGACGTCTGATG

>1443

ACATATACACGCACATAAACACCACCACCAGGCTTGCTGAGAACAAGTCAAATGTGC  
CACCAAACCATCGTCTTAGTGGGAGATGGGGTGGCACTGCAGGGGCAGAAAGACTGA  
CGTCTGATGGACTTGGGTTTGAATA

>1444

AGTCAAATGTGCCACCAAACCATCGTCTTAGTGGGAGATGGGGTGGCACTGCAGGGGC  
AGAAAGACTGACGTCTGATGGACTTGGGTTTGAATACTAGTGTCCATGGTGAATTTG  
GGCAAATGACTTCACCTCTGTGAA

>1445

CAAACCATCGTCTTAGTGGGAGATGGGGTGGCACTGCAGGGGCAGAAAGACTGACGT  
CTGATGGACTTGGGTTTGAATACTAGTGTCCATGGTGAATTTGGGCAAATGACTTCAC  
CTCTGTGAAGCAGCAGTATCCTCT

>1446

ATGGGGTGGCACTGCAGGGGCAGAAAGACTGACGTCTGATGGACTTGGGTTTGAATAC

TAGTGCTCCATGGTGAATTTGGGCAAATGACTTCACCTCTGTGAAGCAGCAGTATCCTC  
TTCTGTGAAGTGAGGTTAGCCCC

>1447

CTGACGTCTGATGGACTTGGGTTTGAATACTAGTGCTCCATGGTGAATTTGGGCAAATG  
ACTTCACCTCTGTGAAGCAGCAGTATCCTCTTCTGTGAAGTGAGGTTAGCCCCCTACCTC  
TCAATGTGGTTTTTAAAGTATG

>1448

TGGACTTGGGTTTGAATACTAGTGCTCCATGGTGAATTTGGGCAAATGACTTCACCTCT  
GTGAAGCAGCAGTATCCTCTTCTGTGAAGTGAGGTTAGCCCCCTACCTCTCAATGTGGTT  
TTTAAAGTATGTTAATGAGATC

>1449

CAAATGACTTCACCTCTGTGAAGCAGCAGTATCCTCTTCTGTGAAGTGAGGTTAGCCC  
CTACCTCTCAATGTGGTTTTTAAAGTATGTTAATGAGATCACTTGTAACCTAAAGCACAC  
AGAGTGTGAGGCCACCTCCCTA

>1450

ATGACTTCACCTCTGTGAAGCAGCAGTATCCTCTTCTGTGAAGTGAGGTTAGCCCCCTAC  
CTCTCAATGTGGTTTTTAAAGTATGTTAATGAGATCACTTGTAACCTAAAGCACACAGA  
GTGTGAGGCCACCTCCCTACTT

>1451

CCTCTTCTGTGAAGTGAGGTTAGCCCCCTACCTCTCAATGTGGTTTTTAAAGTATGTTAAT  
GAGATCACTTGTAACCTAAAGCACACAGAGTGTGAGGCCACCTCCCTACTTCTGCTT  
CTCTCATGACCCCAGCCTGACA

>1452

TTAGCCCCTACCTCTCAATGTGGTTTTTAAAGTATGTTAATGAGATCACTTGTAACCTAA  
AGCACACAGAGTGTGAGGCCACCTCCCTACTTCTGCTTCTCTCATGACCCCAGCCTG  
ACAAGGGAGCCGCTGAGCCCCC

>1453

AGCCCCTACCTCTCAATGTGGTTTTTAAAGTATGTTAATGAGATCACTTGTAACCTAAAG  
CACACAGAGTGTGAGGCCACCTCCCTACTTCTGCTTCTCTCATGACCCCAGCCTGAC  
AAGGGAGCCGCTGAGCCCCCTG

>1454

TACTTCTGCTTCTCTCATGACCCCAGCCTGACAAGGGAGCCGCTGAGCCCCCTGCCA  
CCCTACCCGGCGTTGTGCTCTAAGTGGATTAGCTCAGCGTTGTGATCTTAATGCCATT  
AGGCCTGTTGGCACGGCTCTCCT

>1455

TTCTGCTTCTCTCATGACCCCAGCCTGACAAGGGAGCCGCTGAGCCCCCTGCCACCC  
TCACCCGGCGTTGTGCTCTAAGTGGATTAGCTCAGCGTTGTGATCTTAATGCCATTAGG  
CCTGTTGGCACGGCTCTCCTTGC

>1456

GACAAGGGAGCCGCTGAGCCCCCTGCCACCCTACCCGGCGTTGTGCTCTAAGTGGAT  
TAGCTCAGCGTTGTGATCTTAATGCCATTAGGCCTGTTGGCACGGCTCTCCTTGCCATA  
GTGAGAAGCAGATGTGGCCGACC

>1457

TGCCACCCTACCCGGCGTTGTGCTCTAAGTGGATTAGCTCAGCGTTGTGATCTTAATG  
CCATTAGGCCTGTTGGCACGGCTCTCCTTGCCATAGTGAGAAGCAGATGTGGCCGACC  
ATAATGGCCCTTAGCGTGATCCA

>1458

TCTAAGTGGATTAGCTCAGCGTTGTGATCTTAATGCCATTAGGCCTGTTGGCACGGCTC  
TCCTTGCCATAGTGAGAAGCAGATGTGGCCGACCATAATGGCCCTTAGCGTGATCCATC  
GGGCCACAGTGCTGGGGCAAC

>1459

GCTCAGCGTTGTGATCTTAATGCCATTAGGCCTGTTGGCACGGCTCTCCTTGCCATAGT  
GAGAAGCAGATGTGGCCGACCATAATGGCCCTTAGCGTGATCCATCGGGCCCACAGTG  
CTGGGGCAACCATTATTAGTGTT

>1460

TTAGGCCTGTTGGCACGGCTCTCCTTGCCATAGTGAGAAGCAGATGTGGCCGACCATAA  
TGGCCCTTAGCGTGATCCATCGGGCCCACAGTGCTGGGGCAACCATTATTAGTGTTAAT  
TTGGGGGAGCTTTTTATGGTAG

>1461

TCTCCTTGCCATAGTGAGAAGCAGATGTGGCCGACCATAATGGCCCTTAGCGTGATCCA  
TCGGGCCACAGTGCTGGGGCAACCATTATTAGTGTTAATTTGGGGGAGCTTTTTATGG  
TAGCTGGGGGAAATGTGGAGGG

>1462

CAGATGTGGCCGACCATAATGGCCCTTAGCGTGATCCATCGGGCCCACAGTGCTGGGG  
CAACCATTATTAGTGTTAATTTGGGGGAGCTTTTTATGGTAGCTGGGGGAAATGTGGAG  
GGATTGTTGGAAATTTATTTAAG

>1463

GATGTGGCCGACCATAATGGCCCTTAGCGTGATCCATCGGGCCCACAGTGCTGGGGCA  
ACCATTATTAGTGTTAATTTGGGGGAGCTTTTTATGGTAGCTGGGGGAAATGTGGAGGG  
ATTGTTGGAAATTTATTTAAGCT

>1464

TAGCGTGATCCATCGGGCCCACAGTGCTGGGGCAACCATTATTAGTGTTAATTTGGGGG  
AGCTTTTTATGGTAGCTGGGGGAAATGTGGAGGGATTGTTGGAAATTTATTTAAGCTGT  
TCAGCAGGTTAGGTGCTGCTGG

>1465

GTTAATTTGGGGGAGCTTTTTATGGTAGCTGGGGGAAATGTGGAGGGATTGTTGGAAAT  
TTATTTAAGCTGTTTCAGCAGGTTAGGTGCTGCTGGGGTCTACTATGGCAAACCCCTCAG  
CTCCCCAACCCATCTCTTTAA

>1466

GGGGAGCTTTTTATGGTAGCTGGGGGAAATGTGGAGGGATTGTTGGAAATTTATTTAAG  
CTGTTTCAGCAGGTTAGGTGCTGCTGGGGTCTACTATGGCAAACCCCTCAGCTCCCCCA  
ACCCATCTCTTTAAGGAACGTCC

>1467

GCAGGTTAGGTGCTGCTGGGGTCTACTATGGCAAACCCCTCAGCTCCCCAACCCATC  
TCTTTAAGGAACGTCCCTCCCCAACCCGAAGCCCAGGCCTGATTACTTCCAGAGTTG  
GAGAGACAACCTTAGCAGGCTCTTG

>1468

GCTCCCCAACCCATCTCTTTAAGGAACGTCCCTCCCCAACCCGAAGCCCAGGCCTG  
ATTACTTCCAGAGTTGGAGAGACAACCTTAGCAGGCTCTGTTTCTTGCCGATGTACCTT  
ATTAGTAGCACCTGGCATCATAA

>1469

CGTCCCTCCCCAACCCGAAGCCCAGGCCTGATTACTTCCAGAGTTGGAGAGACAACCT

TAGCAGGCTCTGTTTCTTGCCGATGTACCTTATTAGTAGCACCTGGCATCATAACCCAC  
TAATGGGAACCAGTGCTCTCCT

>1470

AGGCCTGATTACTTCCAGAGTTGGAGAGACAACCTTAGCAGGCTCTGTTTCTTGCCGAT  
GTACCTTATTAGTAGCACCTGGCATCATAACCCACTAATGGGAACCAGTGCTCTCCTCC  
TGCCTGGCCAGTGACAAGTAGC

>1471

GCAGGCTCTGTTTCTTGCCGATGTACCTTATTAGTAGCACCTGGCATCATAACCCACTA  
ATGGGAACCAGTGCTCTCCTCCTGCGTGGCCAGTGACAAGTAGCCCTGTCAGCCGGAG  
CTCGCCGTGCGAGGAAGTTCCT

>1472

TTGCCGATGTACCTTATTAGTAGCACCTGGCATCATAACCCACTAATGGGAACCAGTGC  
TCTCCTCCTGCGTGGCCAGTGACAAGTAGCCCTGTCAGCCGGAGCTCGCCGTGCGAGG  
AAGTTCCTATTAGCTTATGGTC

>1473

TGTACCTTATTAGTAGCACCTGGCATCATAACCCACTAATGGGAACCAGTGCTCTCCTC  
CTGCGTGGCCAGTGACAAGTAGCCCTGTCAGCCGGAGCTCGCCGTGCGAGGAAGTTC  
CTATTAGCTTATGGTCAGGAGAA

>1474

TATTAGTAGCACCTGGCATCATAACCCACTAATGGGAACCAGTGCTCTCCTCCTGCGTG  
GCCAGTGACAAGTAGCCCTGTCAGCCGGAGCTCGCCGTGCGAGGAAGTTCCTATTAGC  
TTTATGGTCAGGAGAACTTGTCC

>1475

GCACCTGGCATCATAACCCACTAATGGGAACCAGTGCTCTCCTCCTGCGTGGCCAGTG  
ACAAGTAGCCCTGTCAGCCGGAGCTCGCCGTGCGAGGAAGTTCCTATTAGCTTATGG  
TCAGGAGAACTTGCCTGTTTCAGG

>1476

GAACCAGTGCTCTCCTCCTGCGTGGCCAGTGACAAGTAGCCCTGTCAGCCGGAGCTCG  
CCGTGCGAGGAAGTTCCTATTAGCTTATGGTCAGGAGAACTTGCCTGTTTCAGGAAAT  
GAATGTTGCCGCTAAAGGTCCGC

>1477

TGCGTGGCCAGTGACAAGTAGCCCTGTCAGCCGGAGCTCGCCGTGCGAGGAAGTTC  
TATTAGCTTATGGTCAGGAGAACTTGTCTGTTTCAGGAAATGAATGTTGCCGCTAAAG  
GTCCGCGGCCCTGACCCTGGCGGC

>1478

ACAAGTAGCCCTGTCAGCCGGAGCTCGCCGTGCGAGGAAGTTCCTATTAGCTTATGG  
TCAGGAGAACTTGCCTGTTTCAGGAAATGAATGTTGCCGCTAAAGGTCCGCGGCCCTG  
ACCCTGGCGGCATAACCTGTGCGG

>1479

GAGCTCGCCGTGCGAGGAAGTTCCTATTAGCTTATGGTCAGGAGAACTTGCCTGTTTC  
AGGAAATGAATGTTGCCGCTAAAGGTCCGCGGCCCTGACCCTGGCGGCATAACCTGTG  
CGGGCCGGGGAGACCCTGTGCAG

>1480

GAACCTGTCCTGTTTCAGGAAATGAATGTTGCCGCTAAAGGTCCGCGGCCCTGACCCTG  
GCGGCATAACCTGTGCGGGCCGGGAGACCCTGTGCAGGATGCTTGGGATTCAGCCC  
CTCTCTGGTTCTTGTCATATGTAA

>1481

ATGAATGTTGCCGCTAAAGGTCCGCGGCCCTGACCCTGGCGGCATAACCTGTGCGGGC  
CGGGGAGACCCTGTGCAGGATGCTTGGGATTCAGCCCCTCTCTGGTTCTTGTTCATATG  
TAAAGAGGGAATCATTGTGGTAT

>1482

CCCTGGCGGCATAACCTGTGCGGGCCGGGGAGACCCTGTGCAGGATGCTTGGGATTC  
AGCCCCTCTCTGGTTCTTGTTCATATGTAAAGAGGGAATCATTGTGGTATGTTGCAGCCTT  
GAACTTTTGATTTATGCAGTGA

>1483

CGGCATAACCTGTGCGGGCCGGGGAGACCCTGTGCAGGATGCTTGGGATTCAGCCCC  
TCTCTGGTTCTTGTTCATATGTAAAGAGGGAATCATTGTGGTATGTTGCAGCCTTGAACCTT  
TTGATTTATGCAGTGAGGGCGA

>1484

AGACCCTGTGCAGGATGCTTGGGATTCAGCCCCTCTCTGGTTCTTGTTCATATGTAAAG  
AGGGAATCATTGTGGTATGTTGCAGCCTTGAACCTTTGATTTATGCAGTGAGGGCGACT  
TAACCGTTTCCATGCCTGGACG

>1485

TCTGGTTCTTGTTCATATGTAAAGAGGGAATCATTGTGGTATGTTGCAGCCTTGAACCTTT  
GATTTATGCAGTGAGGGCGACTTAACCGTTTCCATGCCTGGACGGCTGTGCAGTGACA  
GAGCCGTGTTGTGAGCGTATGT

>1486

GTAAAGAGGGAATCATTGTGGTATGTTGCAGCCTTGAACCTTTGATTTATGCAGTGAGG  
GCGACTTAACCGTTTCCATGCCTGGACGGCTGTGCAGTGACAGAGCCGTGTTGTGAGC  
GTATGTGCCTAGGTACATGTGTG

>1487

TTGCAGCCTTGAACCTTTGATTTATGCAGTGAGGGCGACTTAACCGTTTCCATGCCTGG  
ACGGCTGTGCAGTGACAGAGCCGTGTTGTGAGCGTATGTGCCTAGGTACATGTGTGTG  
TGGGGTGGTCAAGGGGAAGGAGA

>1488

AACTTTTGATTTATGCAGTGAGGGCGACTTAACCGTTTCCATGCCTGGACGGCTGTGCA  
GTGACAGAGCCGTGTTGTGAGCGTATGTGCCTAGGTACATGTGTGTGTGGGGTGGTCA  
AGGGGAAGGAGAGACCCCCACGT

>1489

TTGATTTATGCAGTGAGGGCGACTTAACCGTTTCCATGCCTGGACGGCTGTGCAGTGAC  
AGAGCCGTGTTGTGAGCGTATGTGCCTAGGTACATGTGTGTGTGGGGTGGTCAAGGGG  
AAGGAGAGACCCCCACGTGCTAG

>1490

TAACCGTTTCCATGCCTGGACGGCTGTGCAGTGACAGAGCCGTGTTGTGAGCGTATGT  
GCCTAGGTACATGTGTGTGTGGGGTGGTCAAGGGGAAGGAGAGACCCCCACGTGCTA  
GCAGGGGCTGTTGCTGGGAGCGGGT

>1491

CCGTGTTGTGAGCGTATGTGCCTAGGTACATGTGTGTGTGGGGTGGTCAAGGGGAAGG  
AGAGACCCCCACGTGCTAGCAGGGGCTGTTGCTGGGAGCGGGTGGATTCATGGGAG  
GATTCCTTTCTTTTTCTTTTTCT

>1492

ATGTGCCTAGGTACATGTGTGTGTGGGGTGGTCAAGGGGAAGGAGAGACCCCCACGT

GCTAGCAGGGGCTGTTGCTGGGAGCGGGTGGATTCATGGGAGGATTCCTTTTCTTTT  
TCTTTTCTTGCATTCTTGCAGCA

>1493

ATTCATGGGAGGATTCCTTTTCTTTTCTTTTCTTGCATTCTTGCAGCATCTAAATT  
CCTGCGATTGTTGGCTGCAAAGTGGTAAGAAGCTGGAGAGCATTGTGTCTGGAATTGA  
ACCTGGGTTCGAATTAATCTT

>1494

GATTCCTTTTCTTTTCTTTTCTTGCATTCTTGCAGCATCTAAATTCCTGCGATTGTT  
GGCTGCAAAGTGGTAAGAAGCTGGAGAGCATTGTGTCTGGAATTGAACCTGGGTTG  
AATTAATCTTCTGTCTTAGA

>1495

CTTGCATTCTTGCAGCATCTAAATTCCTGCGATTGTTGGCTGCAAAGTGGTAAGAAGC  
TGGAGAGCATTGTGTCTGGAATTGAACCTGGGTTCAATTAATCTTCTGTCTTAGAG  
GCTGTGTGACCGTGGCAAGATT

>1496

AAATTCCTGCGATTGTTGGCTGCAAAGTGGTAAGAAGCTGGAGAGCATTGTGTCTGG  
AATTGAACCTGGGTTCAATTAATCTTCTGTCTTAGAGGCTGTGTGACCGTGGCAAG  
ATCCTCACCCTCACTTCTCA

>1497

TGGCTGCAAAGTGGTAAGAAGCTGGAGAGCATTGTGTCTGGAATTGAACCTGGGTTG  
AATTAATCTTCTGTCTTAGAGGCTGTGTGACCGTGGCAAGATTCCTCACCCTCACT  
TCCTCATCTGTGAGATGAAGTTA

>1498

TAAGAAGCTGGAGAGCATTGTGTCTGGAATTGAACCTGGGTTCAATTAATCTTCTGTC  
TCTTAGAGGCTGTGTGACCGTGGCAAGATTCCTCACCCTCACTTCCTCATCTGTGAGA  
TGAAGTTAATAACTTCTGATTC

>1499

CGAATTAATCTTCTGTCTTAGAGGCTGTGTGACCGTGGCAAGATTCCTCACCCTCA  
CTTCCTCATCTGTGAGATGAAGTTAATAACTTCTGATTCATACTGGTGGTAGAGCAGTG  
TTGTTAAGTAGGTGATGTATAG

>1500

TTCTGTCTTAGAGGCTGTGTGACCGTGGCAAGATTCCTCACCCTCACTTCCTCATC  
TGTGAGATGAAGTTAATAACTTCTGATTCATACTGGTGGTAGAGCAGTGTTGTTAAGTA  
GGTGATGTATAGAGAATACATG

>1501

CCGTGGCAAGATTCCTCACCCTCACTTCCTCATCTGTGAGATGAAGTTAATAACTTCT  
GATTCATACTGGTGGTAGAGCAGTGTTGTTAAGTAGGTGATGTATAGAGAATACATGGC  
CCAGCGTCCGGCCAGTGGTGTG

>1502

CCTCACCCTCACTTCCTCATCTGTGAGATGAAGTTAATAACTTCTGATTCATACTGGTG  
GTAGAGCAGTGTTGTTAAGTAGGTGATGTATAGAGAATACATGGCCAGCGTCCGGCC  
AGTGGTGTGGCCTCAGGTTGTA

>1503

CACCCTCACTTCCTCATCTGTGAGATGAAGTTAATAACTTCTGATTCATACTGGTGGTA  
GAGCAGTGTTGTTAAGTAGGTGATGTATAGAGAATACATGGCCAGCGTCCGGCCAGT  
GGTGTGGCCTCAGGTTGTATAC

>1504

CTCACTTCCTCATCTGTGAGATGAAGTTAATAACTTCTGATTCATACTGGTGGTAGAGC  
AGTGTGTTAAGTAGGTGATGTATAGAGAATACATGGCCCAGCGTCCGGCCAGTGGTGT  
GGCCTCAGGTTGTATACTTGAA

>1505

TCATCTGTGAGATGAAGTTAATAACTTCTGATTCATACTGGTGGTAGAGCAGTGTGTTA  
AGTAGGTGATGTATAGAGAATACATGGCCCAGCGTCCGGCCAGTGGTGTGGCCTCAGG  
TTGTATACTTGAAAGGATGTGT

>1506

ACTTCTGATTCATACTGGTGGTAGAGCAGTGTGTTAAGTAGGTGATGTATAGAGAATA  
CATGGCCCAGCGTCCGGCCAGTGGTGTGGCCTCAGGTTGTATACTTGAAAGGATGTGTA  
TACTTCAGTATTTTTTCCATTG

>1507

AGCAGTGTGTTAAGTAGGTGATGTATAGAGAATACATGGCCCAGCGTCCGGCCAGTG  
GTGTGGCCTCAGGTTGTATACTTGAAAGGATGTGTATACTTCAGTATTTTTTCCATTGTA  
AAATTAAGGGTTTTTTTTCTTT

>1508

AGTGTGTTAAGTAGGTGATGTATAGAGAATACATGGCCCAGCGTCCGGCCAGTGGTGT  
GGCCTCAGGTTGTATACTTGAAAGGATGTGTATACTTCAGTATTTTTTCCATTGTAAAT  
TAAGGGTTTTTTTTCTTTTT

>1509

TGATGTATAGAGAATACATGGCCCAGCGTCCGGCCAGTGGTGTGGCCTCAGGTTGTATA  
CTTGAAAGGATGTGTATACTTCAGTATTTTTTCCATTGTAAATTAAGGGTTTTTTTTCTT  
TTTTTCTTGAGACAGAGTCC

>1510

CGTCCGGCCAGTGGTGTGGCCTCAGGTTGTATACTTGAAAGGATGTGTATACTTCAGTA  
TTTTTCCATTGTAAATTAAGGGTTTTTTTTCTTTTTTCTTGAGACAGAGTCCTACTTT  
GTTGCCAGGCTTGAGTGCA

>1511

GGTGTGGCCTCAGGTTGTATACTTGAAAGGATGTGTATACTTCAGTATTTTTTCCATTGT  
AAAATTAAGGGTTTTTTTTCTTTTTTCTTGAGACAGAGTCCTACTTTGTTGCCAGGCT  
TGAGTGCAGTGGCGCGATCT

>1512

GGATGTGTATACTTCAGTATTTTTTCCATTGTAAATTAAGGGTTTTTTTTCTTTTTTCT  
TGAGACAGAGTCCTACTTTGTTGCCAGGCTTGAGTGCAGTGGCGCGATCTCAGCTCA  
CTGCAACTTCCGCCTCCTGGG

>1513

ACTTCAGTATTTTTTCCATTGTAAATTAAGGGTTTTTTTTCTTTTTTCTTGAGACAGA  
GTCCTACTTTGTTGCCAGGCTTGAGTGCAGTGGCGCGATCTCAGCTCACTGCAACTTC  
CGCCTCCTGGGTCCAAGTGAT

>1514

AGTCCTACTTTGTTGCCAGGCTTGAGTGCAGTGGCGCGATCTCAGCTCACTGCAACT  
TCCGCCTCCTGGGTCCAAGTGATTCTCGTGCCTCAGCCTCCCAAGTACCTGGGACCAC  
AGGGGTGCACCACCACACCTGGCT

>1515

ACTTTGTTGCCAGGCTTGAGTGCAGTGGCGCGATCTCAGCTCACTGCAACTTCCGCC



TCCTGGGTCCAAGTGATTCTCGTGCCTCAGCCTCCCAAGTACCTGGGACCACAGGGGT  
GCACCACCACACCTGGCTAATTTT

>1516

TGGCGGATCTCAGCTCACTGCAACTCCGCCTCCTGGGTCCAAGTGATTCTCGTGCCT  
CAGCCTCCCAAGTACCTGGGACCACAGGGGTGCACCACCACACCTGGCTAATTTTTGT  
ATATATATATATATATATATTTA

>1517

CTGCAACTCCGCCTCCTGGGTCCAAGTGATTCTCGTGCCTCAGCCTCCCAAGTACCTG  
GGACCACAGGGGTGCACCACCACACCTGGCTAATTTTTGTATATATATATATATATATT  
TAGTAGAGATGGGGTTTCGC

>1518

TGATTCTCGTGCCTCAGCCTCCCAAGTACCTGGGACCACAGGGGTGCACCACCACACC  
TGGCTAATTTTTGTATATATATATATATATATTTAGTAGAGATGGGGTTTCGCCATGTTG  
GCCAGGCTGGTCTTGAAGTC

>1519

GTACCTGGGACCACAGGGGTGCACCACCACACCTGGCTAATTTTTGTATATATATATATA  
TATATATTTAGTAGAGATGGGGTTTCGCCATGTTGGCCAGGCTGGTCTTGAAGTCCCGA  
CCTCAGGTGATCTGCCTGTCT

>1520

CACAGGGGTGCACCACCACACCTGGCTAATTTTTGTATATATATATATATATATTTAGTA  
GAGATGGGGTTTCGCCATGTTGGCCAGGCTGGTCTTGAAGTCCCGACCTCAGGTGATC  
TGCCTGTCTCAGCCTCCTAA

>1521

GGCTAATTTTTGTATATATATATATATATATTTAGTAGAGATGGGGTTTCGCCATGTTGG  
CCAGGCTGGTCTTGAAGTCCCGACCTCAGGTGATCTGCCTGTCTCAGCCTCCTAAAGT  
GCTGGGATTATAGGTGTGAG

>1522

ATATATATATATTTAGTAGAGATGGGGTTTCGCCATGTTGGCCAGGCTGGTCTTGAAGTC  
CCGACCTCAGGTGATCTGCCTGTCTCAGCCTCCTAAAGTGCTGGGATTATAGGTGTGAG  
CCTGCGCCTGGCCTAAGTT

>1523

TTTAGTAGAGATGGGGTTTCGCCATGTTGGCCAGGCTGGTCTTGAAGTCCCGACCTCA  
GGTGATCTGCCTGTCTCAGCCTCCTAAAGTGCTGGGATTATAGGTGTGAGCCACTGCGC  
CTGGCCTAAGTTTTTAAAAATTA

>1524

CAGGCTGGTCTTGAAGTCCCGACCTCAGGTGATCTGCCTGTCTCAGCCTCCTAAAGTG  
CTGGGATTATAGGTGTGAGCCACTGCGCCTGGCCTAAGTTTTTAAAAATTAAGAAAT  
GGCATAGTGCTTTTTTGCTCTTT

>1525

CAGGTGATCTGCCTGTCTCAGCCTCCTAAAGTGCTGGGATTATAGGTGTGAGCCACTGC  
GCCTGGCCTAAGTTTTTAAAAATTAAGAAATGGCATAGTGCTTTTTTGCTCTTTAAC  
AGATCAAGACCAAAAGTTTTCC

>1526

AAGTGCTGGGATTATAGGTGTGAGCCACTGCGCCTGGCCTAAGTTTTTAAAAATTAAGAA  
AGAATGGCATAGTGCTTTTTTGCTCTTTAACAGATCAAGACCAAAAGTTTTCCCCCAT  
CATAGCCCAAAGTCCTAAAGAA

>1527

GGCCTAAGTTTTTAAAAATAAAAAGAATGGCATAGTGCTTTTTTGCTCTTTAACAGAT  
CAAGACCAAAGTTTTCCCCCATCATAGCCCAAAGTCCTAAAGAAAGGCTACTTAAG  
TTGTTTCGTTTTCTTTGTTTCTC

>1528

AGAATGGCATAGTGCTTTTTTGCTCTTTAACAGATCAAGACCAAAGTTTTCCCCCAT  
CATAGCCCAAAGTCCTAAAGAAAGGCTACTTAAGTTGTTTCGTTTTCTTTGTTTCTCCC  
ATGAGTAATGTTTCTAAGTGTG

>1529

CTCTTTAACAGATCAAGACCAAAGTTTTCCCCCATCATAGCCCAAAGTCCTAAAGA  
AAGGCTACTTAAGTTGTTTCGTTTTCTTTGTTTCTCCCATGAGTAATGTTTCTAAGTGTG  
ATTTTTGCAGAGAACAGCAGTG

>1530

TTAACAGATCAAGACCAAAGTTTTCCCCCATCATAGCCCAAAGTCCTAAAGAAAG  
GCTACTTAAGTTGTTTCGTTTTCTTTGTTTCTCCCATGAGTAATGTTTCTAAGTGTGATTT  
TTGCAGAGAACAGCAGTGTCT

>1531

ACCAAAGTTTTCCCCCATCATAGCCCAAAGTCCTAAAGAAAGGCTACTTAAGTTGTT  
CGTTTTCTTTGTTTCTCCCATGAGTAATGTTTCTAAGTGTGATTTTTGCAGAGAACAGC  
AGTGTCTGACCTCATTCTTGA

>1532

AAAGTCCTAAAGAAAGGCTACTTAAGTTGTTTCGTTTTCTTTGTTTCTCCCATGAGTAA  
TGTTTCTAAGTGTGATTTTTGCAGAGAACAGCAGTGTCTGACCTCATTCTTGAGGGGA  
ACTTTTCTGCCTGCCTCTTCTTG

>1533

TAAGTTGTTTCGTTTTCTTTGTTTCTCCCATGAGTAATGTTTCTAAGTGTGATTTTTGCA  
GAGAACAGCAGTGTCTGACCTCATTCTTGAGGGGAACTTTTCTGCCTGCCTCTTCTTG  
AGAAAAAATGTTTGTGAGTTGT

>1534

AGTTGTTTCGTTTTCTTTGTTTCTCCCATGAGTAATGTTTCTAAGTGTGATTTTTGCAGA  
GAACAGCAGTGTCTGACCTCATTCTTGAGGGGAACTTTTCTGCCTGCCTCTTCTTGAG  
AAAAAATGTTTGTGAGTTGTCT

>1535

GCAGAGAACAGCAGTGTCTGACCTCATTCTTGAGGGGAACTTTTCTGCCTGCCTCTTC  
TTGAGAAAAAATGTTTGTGAGTTGTCTGGCAAATGGATGCGTTACTTTTGCTGCTGTTG  
CTGCCGCTGCCGTTTTAAAGGCC

>1536

AGAACAGCAGTGTCTGACCTCATTCTTGAGGGGAACTTTTCTGCCTGCCTCTTCTTGA  
GAAAAAATGTTTGTGAGTTGTCTGGCAAATGGATGCGTTACTTTTGCTGCTGTTGCTGC  
CGCTGCCGTTTTAAAGGCCCTG

>1537

CTTGAGGGGAACTTTTCTGCCTGCCTCTTCTTGAGAAAAAATGTTTGTGAGTTGTCTGG  
CAAATGGATGCGTTACTTTTGCTGCTGTTGCTGCCGCTGCCGTTTTAAAGGCCCTGGT  
GACAAAGGAGTGAAGTGCCTT

>1538

TTGAGAAAAAATGTTTGTGAGTTGTCTGGCAAATGGATGCGTTACTTTTGCTGCTGTTG

CTGCCGCTGCCGTTTTAAAGGCCCTGGTGACAAAGGAGTGAAGTGCACCTTCGGGGA  
AAGCATGCCGGAATCTGGCCAG

>1539

GTGAGTTGTCTGGCAAATGGATGCGTTACTTTTGCTGCTGTTGCTGCCGCTGCCGTTTT  
AAAGGCCCTGGTGACAAAGGAGTGAAGTGCACCTTCGGGGAAAGCATGCCGGAATC  
TGGCCAGAAAAGAGGGGCCGCTG

>1540

GGAGTGAAGTGCACCTTCGGGGAAAGCATGCCGGAATCTGGCCAGAAAAGAGGGGC  
CGCTGGGGGAAGGGTTTGAGATGACGCCTCCTCAGGAACCTTAAAAGAAATCTGTCC  
ATCTGTCTCTGGCATTATGGCATC

>1541

CCCAGAAAAGAGGGGCCGCTGGGGGAAGGGTTTGAGATGACGCCTCCTCAGGAACCT  
TAAAAGAAATCTGTCCATCTGTCTCTGGCATTATGGCATCGTTGACAGCAGTTCAAG  
GAAAATAAAAATAAGTTCTTATC

>1542

AGAGGGGCCGCTGGGGGAAGGGTTTGAGATGACGCCTCCTCAGGAACCTTAAAAGA  
AATCTGTCCATCTGTCTCTGGCATTATGGCATCGTTGACAGCAGTTCAAGGAAAATA  
AAAATAAGTTCTTATCTGATTGCG

>1543

GACGCCTCCTCAGGAACCTTAAAAGAAATCTGTCCATCTGTCTCTGGCATTATGGCAT  
CGTTGACAGCAGTTCAAGGAAAATAAAAATAAGTTCTTATCTGATTGCGGGGCTGATT  
GCAAAGCCGAAGGACTAGAGTG

>1544

AAGAAATCTGTCCATCTGTCTCTGGCATTATGGCATCGTTGACAGCAGTTCAAGGAAA  
AATAAAAATAAGTTCTTATCTGATTGCGGGGCTGATTGCAAAGCCGAAGGACTAGAGT  
GGCCAGCGAGTCGGGCGGCTGGA

>1545

GCAGTTCAAGGAAAATAAAAATAAGTTCTTATCTGATTGCGGGGCTGATTGCAAAGC  
CGAAGGACTAGAGTGGCCAGCGAGTCGGGCGGCTGGATCTGGAGTTTTGGAGAAAGG  
GCCACTGGCTCATTCTGGGCACGC

>1546

AAAATAAAAATAAGTTCTTATCTGATTGCGGGGCTGATTGCAAAGCCGAAGGACTAG  
AGTGGCCAGCGAGTCGGGCGGCTGGATCTGGAGTTTTGGAGAAAGGGCCACTGGCTC  
ATTTCTGGGCACGCACGCTCACGGA

>1547

ATCTGATTGCGGGGCTGATTGCAAAGCCGAAGGACTAGAGTGGCCAGCGAGTCGGGC  
GGCTGGATCTGGAGTTTTGGAGAAAGGGCCACTGGCTCATTCTGGGCACGCACGCTC  
ACGGAGGCAAGTTCTCACCTCCTCG

>1548

GCGGCTGGATCTGGAGTTTTGGAGAAAGGGCCACTGGCTCATTCTGGGCACGCACGC  
TCACGGAGGCAAGTTCTCACCTCCTCGTGGGCTTCTTCACTTTACGTGGAAAACT  
GTGTACGTCTCAAATAAAAGCAG

>1549

AGTTTTGGAGAAAGGGCCACTGGCTCATTCTGGGCACGCACGCTCACGGAGGCAAG  
TTCTCACCTCCTCGTGGGCTTCTTCACTTTACGTGGAAAACTGTGTACGTCTCAA  
TAAAAGCAGCTTGGCCCGCTT

>1550

GGCTCATTCTGGGCACGCACGCTCACGGAGGCAAGTTCTCACCTCCTCGTGGGCTTC  
TCTTCACTTTACGTGGAAAACTGTGTACGTCTCAAATTTAAAGCAGCTCTTGCCCCG  
TTAGAGCCGGTCAAAGCTGCTTC

>1551

GGGCACGCACGCTCACGGAGGCAAGTTCTCACCTCCTCGTGGGCTTCTTCACTTTA  
CGTGGAAAACTGTGTACGTCTCAAATTTAAAGCAGCTCTTGCCCCGCTTAGAGCCGG  
TGAAAGCTGCTTCGAAGGCGTTTG

>1552

TCTTCACTTTACGTGGAAAACTGTGTACGTCTCAAATTTAAAGCAGCTCTTGCCCC  
GCTTAGAGCCGGTCAAAGCTGCTTCGAAGGCGTTTGTAGAGTAGGGATTGGAAATGTT  
CAATGCAAAAAGTTAAATCGTGAC

>1553

AAACTGTGTACGTCTCAAATTTAAAGCAGCTCTTGCCCCGCTTAGAGCCGGTCAAAGC  
TGCTTCGAAGGCGTTTGTAGAGTAGGGATTGGAAATGTTCAATGCAAAAAGTTAAATCG  
TGACAGTTGTCCCCTAAATGATCT

>1554

AGCAGCTCTTGCCCCGCTTAGAGCCGGTCAAAGCTGCTTCGAAGGCGTTTGTAGAGTA  
GGGATTGGAAATGTTCAATGCAAAAAGTTAAATCGTGACAGTTGTCCCCTAAATGATCTG  
CTAAATTAAGGATCCGCTAACAT

>1555

CCGCTTAGAGCCGGTCAAAGCTGCTTCGAAGGCGTTTGTAGAGTAGGGATTGGAAATG  
TTCAATGCAAAAAGTTAAATCGTGACAGTTGTCCCCTAAATGATCTGCTAAATTAAGGAT  
CCGCTAACATTTGTGAGTCTACC

>1556

AGCCGGTCAAAGCTGCTTCGAAGGCGTTTGTAGAGTAGGGATTGGAAATGTTCAATGC  
AAAAGTTAAATCGTGACAGTTGTCCCCTAAATGATCTGCTAAATTAAGGATCCGCTAAC  
ATTTGTGAGTCTACCTCCCTGCA

>1557

TCAATGCAAAAAGTTAAATCGTGACAGTTGTCCCCTAAATGATCTGCTAAATTAAGGATC  
CGCTAACATTTGTGAGTCTACCTCCCTGCATTCCCCCACCCCCACCCCCGCCCCCTTG  
GCAGAAGGGATAAAGATGGTAC

>1558

TGCAAAAAGTTAAATCGTGACAGTTGTCCCCTAAATGATCTGCTAAATTAAGGATCCGCT  
AACATTTGTGAGTCTACCTCCCTGCATTCCCCCACCCCCACCCCCGCCCCCTTGGCAG  
AAGGGATAAAGATGGTACCTAA

>1559

ATTTGTGAGTCTACCTCCCTGCATTCCCCCACCCCCACCCCCGCCCCCTTGGCAGAAG  
GGATAAAGATGGTACCTAAAACAATGTGAAGCGGCTGCTAAATCGAGTGAAGTACTCTAA  
AACATTTTTCTTCCCTGAAGTT

>1560

TCCCTGCATTCCCCCACCCCCACCCCCGCCCCCTTGGCAGAAGGGATAAAGATGGTA  
CCTAAAACAATGTGAAGCGGCTGCTAAATCGAGTGAAGTACTCTAAAACATTTTTCTTCC  
TTGAAGTTCAGTGTGGAAAACCA

>1561

CACCCCCGCCCCCTTGGCAGAAGGGATAAAGATGGTACCTAAAACAATGTGAAGCGG

CTGCTAAATCGAGTGACTCTAAAAACATTTTTCTTTCCTTGAAGTTCAGTGTGGAAAAC  
CAGACTGGACTTGTGAGGGATGC

>1562

ATGGTACCTAAAAACAATGTGAAGCGGCTGCTAAATCGAGTGACTCTAAAAACATTTTT  
CTTTCCTTGAAGTTCAGTGTGGAAAACCAGACTGGACTTGTGAGGGATGCAGACCTAT  
ATAGGGCCCATGTGCCTGGCCCC

>1563

ACCTAAAAACAATGTGAAGCGGCTGCTAAATCGAGTGACTCTAAAAACATTTTTCTTTC  
CTTGAAGTTCAGTGTGGAAAACCAGACTGGACTTGTGAGGGATGCAGACCTATATAGG  
GCCCATGTGCCTGGCCCCCTTCC

>1564

TGCTAAATCGAGTGACTCTAAAAACATTTTTCTTTCCTTGAAGTTCAGTGTGGAAAACC  
AGACTGGACTTGTGAGGGATGCAGACCTATATAGGGCCCATGTGCCTGGCCCCCTTCCCT  
CACTTTCTAGCACAAATGGTTTT

>1565

TCTTTCCTTGAAGTTCAGTGTGGAAAACCAGACTGGACTTGTGAGGGATGCAGACCTA  
TATAGGGCCCATGTGCCTGGCCCCCTTCCCTCACTTTCTAGCACAAATGGTTTTTCATTGCCA  
CCTCTCCCGCGCCTTTCCTCC

>1566

GACTTGTGAGGGATGCAGACCTATATAGGGCCCATGTGCCTGGCCCCCTTCCCTCACTTT  
CTAGCACAAATGGTTTTTCATTGCCACCTCTCCCGCGCCTTTCCTCCCTCATAATTATCCA  
CTATTTACTTTCTGTGCCT

>1567

CACAATGGTTTTTCATTGCCACCTCTCCCGCGCCTTTCCTCCCTCATAATTATCCACTATT  
TACTTTCTGTGCCTGACAGCTACAAGAGTAGTTTTTGTTTTTTGAGCTGAGTAGCT  
GCTAAATATTCCCAGCAGC

>1568

CAATGGTTTTTCATTGCCACCTCTCCCGCGCCTTTCCTCCCTCATAATTATCCACTATTTT  
ACTTTCTGTGCCTGACAGCTACAAGAGTAGTTTTTGTTTTTTGAGCTGAGTAGCTGC  
TAAATATTCCCAGCAGCCA

>1569

CCTCTCCCGCGCCTTTCCTCCCTCATAATTATCCACTATTTTACTTTCTGTGCCTGACA  
GCTACAAGAGTAGTTTTTGTTTTTTGAGCTGAGTAGCTGCTAAATATTCCCAGCAGC  
CAGATTCAACGGCTGGGGGG

>1570

CTCCCGCGCCTTTCCTCCCTCATAATTATCCACTATTTTACTTTCTGTGCCTGACAGCT  
ACAAGAGTAGTTTTTGTTTTTTGAGCTGAGTAGCTGCTAAATATTCCCAGCAGCCAG  
ATTCAACGGCTGGGGGGGAG

>1571

CATAATTATCCACTATTTTACTTTCTGTGCCTGACAGCTACAAGAGTAGTTTTTGTTTTT  
TTGAGCTGAGTAGCTGCTAAATATTCCCAGCAGCCAGATTCAACGGCTGGGGGGGAG  
AATAGGCCAAACCTTGGCATC

>1572

CTGCTAAATATTCCCAGCAGCCAGATTCAACGGCTGGGGGGGAGAATAGGCCAAACC  
TTGGCATCCCCTGTTGAAAAGTAAAAATATTTCTGTTTGAGTTAATTTTAGTGCA  
AGCAGATCATGTTAACTGGATGT

>1573

ATTCCCCAGCAGCCAGATTCAACGGCTGGGGGGGAGAATAGGCCAAACCTTGGCATCC  
CCTGTTGCAAAGTGAAAAATATTCTGTTTGCAGTTAATTTTAGTGGCAAGCAGATCA  
TGTTAACTGGATGTAATTGCTTC

>1574

GATTCAACGGCTGGGGGGGAGAATAGGCCAAACCTTGGCATCCCCTGTTGCAAAGTG  
AAAAATATTCTGTTTGCAGTTAATTTAGTGGCAAGCAGATCATGTTAACTGGATGTAA  
TTGCTTCCAGATATGGCCGAGG

>1575

CGGCTGGGGGGGAGAATAGGCCAAACCTTGGCATCCCCTGTTGCAAAGTGAAAAATA  
TTTCTGTTTGCAGTTAATTTAGTGGCAAGCAGATCATGTTAACTGGATGTAATTGCTTC  
CAGATATGGCCGAGGGTTTTGT

>1576

CTTGGCATCCCCTGTTGCAAAGTGAAAAATATTCTGTTTGCAGTTAATTTAGTGGC  
AAGCAGATCATGTTAACTGGATGTAATTGCTTCCAGATATGGCCGAGGGTTTTGTGTGT  
TGAGATGAAGGGTCTGGTAAGT

>1577

CTGTTGCAAAGTGAAAAATATTCTGTTTGCAGTTAATTTAGTGGCAAGCAGATCAT  
GTTAACTGGATGTAATTGCTTCCAGATATGGCCGAGGGTTTTGTGTGTTGAGATGAAGG  
GTCTGGTAAGTGCTTACTTCCT

>1578

GTTTGCAGTTAATTTAGTGGCAAGCAGATCATGTTAACTGGATGTAATTGCTTCCAGAT  
ATGGCCGAGGGTTTTGTGTGTTGAGATGAAGGGTCTGGTAAGTGCTTACTTCCTGTGTA  
AATTAGCCTATTCCATTCAGT

>1579

CAGTTAATTTAGTGGCAAGCAGATCATGTTAACTGGATGTAATTGCTTCCAGATATGGC  
CGAGGGTTTTGTGTGTTGAGATGAAGGGTCTGGTAAGTGCTTACTTCCTGTGTAAATTA  
GCCTATTCCATTCAGTCTTTC

>1580

GTAATTGCTTCCAGATATGGCCGAGGGTTTTGTGTGTTGAGATGAAGGGTCTGGTAAGT  
GCTTACTTCCTGTGTAATTAGCCTATTCCATTCAGTCTTTCATTCTGGCCAGCCCTGGA  
TTCTGTCATTCTGCTCCCAT

>1581

AATTGCTTCCAGATATGGCCGAGGGTTTTGTGTGTTGAGATGAAGGGTCTGGTAAGTGC  
TACTTCCTGTGTAATTAGCCTATTCCATTCAGTCTTTCATTCTGGCCAGCCCTGGATT  
CTGTCATTCTGCTCCCATTTT

>1582

GGGTTTTGTGTGTTGAGATGAAGGGTCTGGTAAGTGCTTACTTCCTGTGTAAATTAGCC  
TATTCCATTCAGTCTTTCATTCTGGCCAGCCCTGGATTCTGTCATTCTGCTCCCATTTTCC  
CCCTCCCAGCCTGCAGCCT

>1583

GTAAGTGCTTACTTCCTGTGTAAATTAGCCTATTCCATTCAGTCTTTCATTCTGGCCAGC  
CCTGGATTCTGTCATTCTGCTCCCATTTTCCCCTCCCAGCCTGCAGCCTGGTGTGAG  
AAGCCGCTTGCTATGTTCTC

>1584

TCTTTCATTCTGGCCAGCCCTGGATTCTGTCATTCTGCTCCCATTTTCCCCTCCCAGC

CTGCAGCCTGGTGTGAGAAGCCGCTTGCTATGTTCTCTAAGTGTAAATCTTTTGTAC  
TTGGAGCCACTCTCCTCTGG

>1585

GGATTCTGTCATTCTGCTCCCATTTTCCCCCTCCCCAGCCTGCAGCCTGGTGTGAGAAG  
CCGCTTGCTATGTTCTCTAAGTGTAAATCTTTTGTCACTTGGAGCCACTCTCCTCTGG  
TTCTTGATGTGAGTTTGCCT

>1586

ATTCTGCTCCCATTTTCCCCCTCCCCAGCCTGCAGCCTGGTGTGAGAAGCCGCTTGCTA  
TGTTCTCTAAGTGTAAATCTTTTGTCACTTGGAGCCACTCTCCTCTTGGTTCTTGATGT  
GAGTTTGCCTTAAATAATGA

>1587

TTTCCCCCTCCCCAGCCTGCAGCCTGGTGTGAGAAGCCGCTTGCTATGTTCTCTAAGT  
GTAATCTTTTGTCACTTGGAGCCACTCTCCTCTTGGTTCTTGATGTGAGTTTGCCTTA  
ATAATGAGAAGGGTTTGA

>1588

AGCCGCTTGCTATGTTCTCTAAGTGTAAATCTTTTGTCACTTGGAGCCACTCTCCTCTT  
GGTTCTTGATGTGAGTTTGCCTTAAATAATGAGAAGGGTTTGAAGATGCCACCTG  
GACCCAGGCCACCTCCCGCT

>1589

GCTTGCTATGTTCTCTAAGTGTAAATCTTTTGTCACTTGGAGCCACTCTCCTCTTGGTT  
CTTGATGTGAGTTTGCCTTAAATAATGAGAAGGGTTTGAAGATGCCACCTGGACC  
CCAGGCCACCTCCCGCTCTT

>1590

ATTCTTTTGTCACTTGGAGCCACTCTCCTCTTGGTTCTTGATGTGAGTTTGCCTTAAAT  
AATGAGAAGGGTTTGAAGATGCCACCTGGACCCAGGCCACCTCCCGCTCTTCC  
CAGCAAAGGCAGATCTGAAGAG

>1591

GATGCCACCTGGACCCAGGCCACCTCCCGCTCTTCCAGCAAAGGCAGATCTGAA  
GAGCATCTCCTGGTCATGGGGTTGCATCTTGAACCCAGAACTCCTTGTTTTCTATGC  
ATTTTTTTTCTACTGCCCTCT

>1592

TGGACCCAGGCCACCTCCCGCTCTTCCAGCAAAGGCAGATCTGAAGAGCATCTC  
CTGGTCATGGGGTTGCATCTTGAACCCAGAACTCCTTGTTTTCTATGCATTTTTTTTT  
CCTACTGCCCTTGACCCCGA

>1593

TCCAGCAAAGGCAGATCTGAAGAGCATCTCCTGGTCATGGGGTTGCATCTTGAAC  
CCAGAACTCCTTGTTTTCTATGCATTTTTTTTTCTACTGCCCTTGACCCCGACTCTC  
ACCTGGGAGAACACCTTCTCT

>1594

ATTTTTTTTCTACTGCCCTTGACCCCGACTCTCACCTGGGAGAACACCTTCTCTTT  
CTCTCAATTAGTCCGACTCCTCCTCAGCCTGAACCTAAGCACGTTCCAGTGGGTCCGAA  
ATCTCAGAAAAAATGAAACGGC

>1595

ACTCTCACCTGGGAGAACACCTTCTCTTTCTCTCAATTAGTCCGACTCCTCCTCAGCCT  
GAACTAAGCACGTTCCAGTGGGTCCGAAATCTCAGAAAAAATGAAACGGCTGTTGCG  
CAGAGGAGAAGGTTGTGGCCACAG

>1596

ACCTGGGAGAACACCTTCTCTTTCTCTCAATTAGTCCGACTCCTCCTCAGCCTGAACTA  
AGCACGTTCCAGTGGGTCCGAAATCTCAGAAAAATGAAACGGCTGTTGCGCAGAGG  
AGAAGGTTGTGGCCACAGAAAGGA

>1597

TCCGACTCCTCCTCAGCCTGAACTAAGCACGTTCCAGTGGGTCCGAAATCTCAGAAAA  
AATGAAACGGCTGTTGCGCAGAGGAGAAGGTTGTGGCCACAGAAAGGAGTTGCCTCA  
TCAGACGTGAAGCCGCCACCTTGCC

>1598

CTGAACTAAGCACGTTCCAGTGGGTCCGAAATCTCAGAAAAATGAAACGGCTGTTGC  
GCAGAGGAGAAGGTTGTGGCCACAGAAAGGAGTTGCCTCATCAGACGTGAAGCCGCC  
ACCTTGCTTGCAAAGCAGGCTGCA

>1599

AACTAAGCACGTTCCAGTGGGTCCGAAATCTCAGAAAAATGAAACGGCTGTTGCGC  
AGAGGAGAAGGTTGTGGCCACAGAAAGGAGTTGCCTCATCAGACGTGAAGCCGCCAC  
CTTGCTTGCAAAGCAGGCTGCACCT

>1600

CAGAAAAATGAAACGGCTGTTGCGCAGAGGAGAAGGTTGTGGCCACAGAAAGGAG  
TTGCCTCATCAGACGTGAAGCCGCCACCTTGCTTGCAAAGCAGGCTGCACCTCCTGA  
CACACCTGCCCTCCCTGCAAGAAAG

>1601

ACCTCCTGACACACCTGCCCTCCCTGCAAGAAAGGGAGGGGAAATCCCACCCAAGA  
GAACCTTCTCCAGGTTCTGTGGGTTTCCAGGGTTGCAACTGAAGAAAAGTGTAAAGA  
TTCATGTTCTCCTAAATTCTGCTTT

>1602

TGACACACCTGCCCTCCCTGCAAGAAAGGGAGGGGAAATCCCACCCAAGAGAACCT  
TCTCCAGGTTCTGTGGGTTTCCAGGGTTGCAACTGAAGAAAAGTGTAAAGATTCATG  
TTCTCCTAAATTCTGCTTTTGCCT

>1603

GAGGGGAAATCCCACCCAAGAGAACCTTCTCCAGGTTCTGTGGGTTTCCAGGGTTGC  
AACTGAAGAAAAGTGTAAAGATTCATGTTCTCCTAAATTCTGCTTTTGCCTGTGGCCA  
GTCCCACATTCTTAGTGCTATTT

>1604

GGGGAAATCCCACCCAAGAGAACCTTCTCCAGGTTCTGTGGGTTTCCAGGGTTGCAA  
CTGAAGAAAAGTGTAAAGATTCATGTTCTCCTAAATTCTGCTTTTGCCTGTGGCCAGT  
CCCACATTCTTAGTGCTATTTGC

>1605

TTCTGTGGGTTTCCAGGGTTGCAACTGAAGAAAAGTGTAAAGATTCATGTTCTCCTAA  
ATTCTGCTTTTGCCTGTGGCCAGTCCCACATTCTTAGTGCTATTTGCATAAGAGGTTGC  
TGTTTATCTTCTATATCAGC

>1606

TGAAGAAAAGTGTAAAGATTCATGTTCTCCTAAATTCTGCTTTTGCCTGTGGCCAGTC  
CCACATTCTTAGTGCTATTTGCATAAGAGGTTGCTGTTTATCTTCTATATCAGCCCCACT  
GATAACCCCTGTGGTCTGTT

>1607

TTCATGTTCTCCTAAATTCTGCTTTTGCCTGTGGCCAGTCCCACATTCTTAGTGCTATTT



GCATAAGAGGTTGCTGTTTATCTTCCTATATCAGCCCCACTGATAACCCCTGTGGTCTGT  
TTAACACCTATGAGGAGT

>1608

CACATTCTTAGTGCTATTTGCATAAGAGGTTGCTGTTTATCTTCCTATATCAGCCCCACTG  
ATAACCCCTGTGGTCTGTTAACACCTATGAGGAGTAGATTACTTGATAAATGCCAGT  
TTTTCCAATATGCAAAGATA

>1609

ATTCTTAGTGCTATTTGCATAAGAGGTTGCTGTTTATCTTCCTATATCAGCCCCACTGATA  
ACCCCTGTGGTCTGTTAACACCTATGAGGAGTAGATTACTTGATAAATGCCAGTTTTT  
CCAATATGCAAAGATAAAC

>1610

AGGTTGCTGTTTATCTTCCTATATCAGCCCCACTGATAACCCCTGTGGTCTGTTAACAA  
CCTATGAGGAGTAGATTACTTGATAAATGCCAGTTTTTCCAATATGCAAAGATAAACTGT  
TGGGGTCAGGGTGAGGGGTG

>1611

ATCAGCCCCACTGATAACCCCTGTGGTCTGTTAACACCTATGAGGAGTAGATTACTT  
GATAAATGCCAGTTTTTCCAATATGCAAAGATAAACTGTTGGGGTCAGGGTGAGGGGT  
GGTGTGTTATGAAGGAGGGGACA

>1612

TCTGTTAACACCTATGAGGAGTAGATTACTTGATAAATGCCAGTTTTTCCAATATGCA  
AAGATAAACTGTTGGGGTCAGGGTGAGGGGTGGTGTGTTATGAAGGAGGGGACAGGT  
GGGGAGCCAGGACCCTCTTTAG

>1613

TAACAACCTATGAGGAGTAGATTACTTGATAAATGCCAGTTTTTCCAATATGCAAAGATA  
AACTGTTGGGGTCAGGGTGAGGGGTGGTGTGTTATGAAGGAGGGGACAGGTGGGGAG  
CCAGGACCCTCTTTAGTGGGCT

>1614

TTTTTCCAATATGCAAAGATAAACTGTTGGGGTCAGGGTGAGGGGTGGTGTGTTATGAA  
GGAGGGGACAGGTGGGGAGCCAGGACCCTCTTTAGTGGGCTGGAGAAGTGTGAAAG  
AGCCTGATGAAAGAAAACAGGTAG

>1615

TGTTGGGGTCAGGGTGAGGGGTGGTGTGTTATGAAGGAGGGGACAGGTGGGGAGCCA  
GGACCCTCTTTAGTGGGCTGGAGAAGTGTGAAAGAGCCTGATGAAAGAAAACAGGT  
AGCTTGTCACATAACAGCTGCATT

>1616

GAGGGGTGGTGTGTTATGAAGGAGGGGACAGGTGGGGAGCCAGGACCCTCTTTAGT  
GGGCTGGAGAAGTGTGAAAGAGCCTGATGAAAGAAAACAGGTAGCTTGTCACATA  
ACAGCTGCATTTATCATAACGTTGAT

>1617

ACAGGTGGGGAGCCAGGACCCTCTTTAGTGGGCTGGAGAAGTGTGAAAGAGCCTGA  
TGAAAGAAAACAGGTAGCTTGTCACATAACAGCTGCATTTATCATAACGTTGATCAG  
CTTCCTGCCCTCACCTACTTTTCT

>1618

GGGAGCCAGGACCCTCTTTAGTGGGCTGGAGAAGTGTGAAAGAGCCTGATGAAAGA  
AACAGGTAGCTTGTCACATAACAGCTGCATTTATCATAACGTTGATCAGCTTCCTG  
CCCTCACCTACTTTTCTCCTCCTT

>1619

AGAAGTGTGAAAGAGCCTGATGAAAGAAAACAGGTAGCTTGTCACATAACAACAGCTG  
CATTATCATAACGGTTGATCAGCTTCCTGCCCTCACCTACTTTTCTCCTCCTTCATGTGG  
ACATGCAGAGTCTCTGAGAACAT

>1620

ACATAACAACAGCTGCATTTATCATAACGGTTGATCAGCTTCCTGCCCTCACCTACTTTTCT  
CCTCCTTCATGTGGACATGCAGAGTCTCTGAGAACATTTTCATCAAGTGGGTTGCCTATG  
CCCACATTAATACAAGATGGG

>1621

GCATTTATCATAACGGTTGATCAGCTTCCTGCCCTCACCTACTTTTCTCCTCCTTCATGTG  
GACATGCAGAGTCTCTGAGAACATTTTCATCAAGTGGGTTGCCTATGCCACATTAATAC  
AAGATGGGAAAGGGTGGAGGT

>1622

GCTCCTGCCCTCACCTACTTTTCTCCTCCTTCATGTGGACATGCAGAGTCTCTGAGAA  
CATTTTCATCAAGTGGGTTGCCTATGCCACATTAATACAAGATGGGAAAGGGTGGAGGT  
TATCTTTGCTTTTTAAGTTCCC

>1623

CCTGCCCTCACCTACTTTTCTCCTCCTTCATGTGGACATGCAGAGTCTCTGAGAACATT  
TCATCAAGTGGGTTGCCTATGCCACATTAATACAAGATGGGAAAGGGTGGAGGTTATC  
TTTGCTTTTTAAGTTCCCATCT

>1624

CATGCAGAGTCTCTGAGAACATTTTCATCAAGTGGGTTGCCTATGCCACATTAATACAA  
GATGGGAAAGGGTGGAGGTTATCTTTGCTTTTTAAGTTCCCATCTTTTTCTCCCTGGTC  
CTCTCCCACCCCTACAAGTTG

>1625

CATCAAGTGGGTTGCCTATGCCACATTAATACAAGATGGGAAAGGGTGGAGGTTATCT  
TTGCTTTTTAAGTTCCCATCTTTTTCTCCCTGGTCCTCTCCCACCCCTACAAGTTGTTG  
GCTGGTAAGCAATTGATGCTC

>1626

CACATTAATACAAGATGGGAAAGGGTGGAGGTTATCTTTGCTTTTTAAGTTCCCATCTTT  
TTCTCCCTGGTCTCTCCCACCCCTACAAGTTGTTGGCTGGTAAGCAATTGATGCTCA  
GAAAAATGATGTTTCATCTGAA

>1627

GGTGGAGGTTATCTTTGCTTTTTAAGTTCCCATCTTTTTCTCCCTGGTCTCTCCCACC  
CCTACAAGTTGTTGGCTGGTAAGCAATTGATGCTCAGAAAAATGATGTTTCATCTGAAAT  
CTTAAATGAGTGGACTTTTTTC

>1628

TTATCTTTGCTTTTTAAGTTCCCATCTTTTTCTCCCTGGTCTCTCCCACCCCTACAAGT  
TGTTGGCTGGTAAGCAATTGATGCTCAGAAAAATGATGTTTCATCTGAAATCTTAAATGA  
GTGGACTTTTTCTACCTTCC

>1629

TTTCTCCCTGGTCTCTCCCACCCCTACAAGTTGTTGGCTGGTAAGCAATTGATGCTC  
AGAAAAATGATGTTTCATCTGAAATCTTAAATGAGTGGACTTTTTCTACCTCCCTGACT  
TTGCAGGTGCTTCTTGAAGAGC

>1630

CCCCTACAAGTTGTTGGCTGGTAAGCAATTGATGCTCAGAAAAATGATGTTTCATCTGAA

ATCTTAAATGAGTGGACTTTTTCTACCTTCCCTGACTTTGCAGGTGCTTCTTGAAGAGC  
CAAGGAGAAAAGAAAATTCTG

>1631

TGCTCAGAAAAATGATGTTTCATCTGAAATCTTAAATGAGTGGACTTTTTCTACCTTCCCT  
GACTTTGCAGGTGCTTCTTGAAGAGCCAAGGAGAAAAGAAAATTCTGACCTCATCA  
CCTAGTCAATAAGCTGTCTGAGA

>1632

ACCTTCCCTGACTTTGCAGGTGCTTCTTGAAGAGCCAAGGAGAAAAGAAAATTCTG  
ACCTCATCACCTAGTCAATAAGCTGTCTGAGAAACAAACAAAAGAGTTTAGACTGGCT  
GCTAAAGCTAGGAACCCAGCTGATA

>1633

CTTTGCAGGTGCTTCTTGAAGAGCCAAGGAGAAAAGAAAATTCTGACCTCATCACCT  
AGTCAATAAGCTGTCTGAGAAACAAACAAAAGAGTTTAGACTGGCTGCTAAAGCTAG  
GAACCCAGCTGATAGCTTTGTTTTG

>1634

TAAGCTGTCTGAGAAACAAACAAAAGAGTTTAGACTGGCTGCTAAAGCTAGGAACCC  
AGCTGATAGCTTTGTTTTGATGTCCTTGTAAATGTTTGCAGGATCGCAGAGGGTGCTATTTA  
GAGCAGGGGGCATCTACTGGGAC

>1635

CTGAGAAACAAACAAAAGAGTTTAGACTGGCTGCTAAAGCTAGGAACCCAGCTGATA  
GCTTTGTTTTGATGTCCTTGTAAATGTTTGCAGGATCGCAGAGGGTGCTATTTAGAGCAGG  
GGGCATCTACTGGGACAGACTCAC

>1636

GCTGCTAAAGCTAGGAACCCAGCTGATAGCTTTGTTTTGATGTCCTTGTAAATGTTTGC  
GATCGCAGAGGGTGCTATTTAGAGCAGGGGGCATCTACTGGGACAGACTCACTGGGAA  
GTTGAAACAGCTAGCTCAAAGTC

>1637

GTAATGTTTGCAGGATCGCAGAGGGTGCTATTTAGAGCAGGGGGCATCTACTGGGACAG  
ACTCACTGGGAAGTTGAAACAGCTAGCTCAAAGTCCAAGAGATGCTAAAGATAGTGA  
AATACAGCCCAGGAATTGAGGGGGA

>1638

AGGGTGCTATTTAGAGCAGGGGGCATCTACTGGGACAGACTCACTGGGAAGTTGAAAC  
AGCTAGCTCAAAGTCCAAGAGATGCTAAAGATAGTAAATACAGCCCAGGAATTGAGG  
GGGAGGGGGTTTCTCACTCAAGAA

>1639

GGCATCTACTGGGACAGACTCACTGGGAAGTTGAAACAGCTAGCTCAAAGTCCAAGA  
GATGCTAAAGATAGTAAATACAGCCCAGGAATTGAGGGGGAGGGGGTTTCTCACTCA  
AGAAGGAGACTTTCTAGGAGGGGGC

>1640

AAACAGCTAGCTCAAAGTCCAAGAGATGCTAAAGATAGTAAATACAGCCCAGGAATT  
GAGGGGGAGGGGGTTTCTCACTCAAGAAGGAGACTTTCTAGGAGGGGGCGGGCGTG  
GTATTTTCTAGGGACAGTATGGAATG

>1641

AATACAGCCCAGGAATTGAGGGGGAGGGGGTTTCTCACTCAAGAAGGAGACTTTCTA  
GGAGGGGGCGGGCGTGGTATTTTCTAGGGACAGTATGGAATGAAGGGAAGAAGGTTG  
GCTTTAGAAGGAGGCACCCTGTGGGA

>1642

ACAGCCCAGGAATTGAGGGGGAGGGGGTTCCTCACTCAAGAAGGAGACTTTCTAGGA  
GGGGGCGGGCGTGGTATTTTCTAGGGACAGTATGGAATGAAGGGAAGAAGGTTGGCTT  
TAGAAGGAGGCACCCTGTGGGAGGC

>1643

GGGGGAGGGGGTTCCTCACTCAAGAAGGAGACTTTCTAGGAGGGGGCGGGCGTGGTA  
TTTTCTAGGGACAGTATGGAATGAAGGGAAGAAGGTTGGCTTTAGAAGGAGGCACCCT  
GTGGGAGGCTGAGACAGGTGGGTCA

>1644

AAGAAGGAGACTTTCTAGGAGGGGGCGGGCGTGGTATTTTCTAGGGACAGTATGGAAT  
GAAGGGAAGAAGGTTGGCTTTAGAAGGAGGCACCCTGTGGGAGGCTGAGACAGGTG  
GGTACCTGAGGTCAGGAGTTTGAGA

>1645

GCGGGCGTGGTATTTTCTAGGGACAGTATGGAATGAAGGGAAGAAGGTTGGCTTTAGA  
AGGAGGCACCCTGTGGGAGGCTGAGACAGGTGGGTACCTGAGGTCAGGAGTTTGAG  
ACCAGCCTGGCCAACATGGTGAAAC

>1646

TAGGGACAGTATGGAATGAAGGGAAGAAGGTTGGCTTTAGAAGGAGGCACCCTGTGG  
GAGGCTGAGACAGGTGGGTACCTGAGGTCAGGAGTTTGAGACCAGCCTGGCCAACA  
TGGTAAACCCAGTCTCTACTAAAAA

>1647

GACAGTATGGAATGAAGGGAAGAAGGTTGGCTTTAGAAGGAGGCACCCTGTGGGAGG  
CTGAGACAGGTGGGTACCTGAGGTCAGGAGTTTGAGACCAGCCTGGCCAACATGGT  
GAAACCCAGTCTCTACTAAAAATACA

>1648

GCACCCTGTGGGAGGCTGAGACAGGTGGGTACCTGAGGTCAGGAGTTTGAGACCAG  
CCTGGCCAACATGGTGAAACCCAGTCTCTACTAAAAATACAAAATTAGCTGGGTGGC  
AGGTGCCTGTAATCCCAGCTAGTCG

>1649

GGAGGCTGAGACAGGTGGGTACCTGAGGTCAGGAGTTTGAGACCAGCCTGGCCAAC  
ATGGTAAACCCAGTCTCTACTAAAAATACAAAATTAGCTGGGTGGCAGGTGCCTGT  
AATCCCAGCTAGTCGGGGGAGGCTG

>1650

CAGGAGTTTGAGACCAGCCTGGCCAACATGGTGAAACCCAGTCTCTACTAAAAATACA  
AAAATTAGCTGGGTGGCAGGTGCCTGTAATCCCAGCTAGTCGGGGGAGGCTGAGGCA  
GGAAAATCGCTTGGGATTACAGGTG

>1651

CATGGTGAAACCCAGTCTCTACTAAAAATACAAAATTAGCTGGGTGGCAGGTGCCTG  
TAATCCCAGCTAGTCGGGGGAGGCTGAGGCAGGAAAATCGCTTGGGATTACAGGTGCC  
TGTAATCCCAGCTAGTCGGGAGAG

>1652

TGGGTGGCAGGTGCCTGTAATCCCAGCTAGTCGGGGGAGGCTGAGGCAGGAAAATCG  
CTTGGGATTACAGGTGCCTGTAATCCCAGCTAGTCGGGAGAGGCTGAGGCAGGAAAAT  
TGCTTGAAGGAGGCGGAGGTTGAG

>1653

ATCCCAGCTAGTCGGGGGAGGCTGAGGCAGGAAAATCGCTTGGGATTACAGGTGCCTG

TAATCCCAGCTAGTCGGGAGAGGCTGAGGCAGGAAAATTGCTTGAAGGAGGCGGAGG  
TTGCAGTGAGCCCAGATCCTGCCGT

>1654

ATTACAGGTGCCTGTAATCCCAGCTAGTCGGGAGAGGCTGAGGCAGGAAAATTGCTTG  
AAGGAGGCGGAGGTTGCAGTGAGCCCAGATCCTGCCGTTGCACTCCAGCCCAAGACT  
TTGTCTCATTAAAAAAAAAAAAAAGA

>1655

GGTGCCTGTAATCCCAGCTAGTCGGGAGAGGCTGAGGCAGGAAAATTGCTTGAAGGA  
GGCGGAGGTTGCAGTGAGCCCAGATCCTGCCGTTGCACTCCAGCCCAAGACTTTGTCT  
CATTAAAAAAAAAAAAAAGAAGAAGA

>1656

TAGTCGGGAGAGGCTGAGGCAGGAAAATTGCTTGAAGGAGGCGGAGGTTGCAGTGAG  
CCCAGATCCTGCCGTTGCACTCCAGCCCAAGACTTTGTCTCATTAAAAAAAAAAAAAAG  
AAGAAGAAGAAGAAGGAGGCACCT

>1657

AAAATTGCTTGAAGGAGGCGGAGGTTGCAGTGAGCCCAGATCCTGCCGTTGCACTCC  
AGCCCAAGACTTTGTCTCATTAAAAAAAAAAAAAAGAAGAAGAAGAAGAAGGAGGCA  
CCCTGGATGAAGACTCAGGCTCCAGAA

>1658

AAAAAAAAAAGAAGAAGAAGAAGAAGGAGGCACCTGGATGAAGACTCAGGCTCC  
AGAATTTACTATCTGTATGTCTTGGGCAAGTGGCTTAGCTTCTCTGAGCCCCTGTTACT  
TTTCTTTTAAAAATGACCACCTTG

>1659

AAAAAAGAAGAAGAAGAAGAAGGAGGCACCTGGATGAAGACTCAGGCTCCAGAA  
TTTACTATCTGTATGTCTTGGGCAAGTGGCTTAGCTTCTCTGAGCCCCTGTTACTTTTC  
TTTTGAAAATGACCACCTTGTTCCA

>1660

AAGAAGAAGAAGGAGGCACCTGGATGAAGACTCAGGCTCCAGAATTTACTATCTGTA  
TGCTTGGGCAAGTGGCTTAGCTTCTCTGAGCCCCTGTTACTTTTCTTTTAAAAATGA  
CCACCTTGCCATGGTAATGAGG

>1661

ATGAAGACTCAGGCTCCAGAATTTACTATCTGTATGTCTTGGGCAAGTGGCTTAGCTTC  
TCTGAGCCCCTGTTACTTTTCTTTTAAAAATGACCACCTTGCCATGGTAATGAGGATA  
AAAAACGTGTAAGTGCATAG

>1662

TGTATGTCTTGGGCAAGTGGCTTAGCTTCTCTGAGCCCCTGTTACTTTTCTTTTAAAA  
TGACCACCTTGCCATGGTAATGAGGATAAAAAACGTGTAAGTGCATAGCAGAGTGC  
AGGTGTACTGGGTAGACATGTA

>1663

CTTGGGCAAGTGGCTTAGCTTCTCTGAGCCCCTGTTACTTTTCTTTTAAAAATGACCA  
CCTTGCCATGGTAATGAGGATAAAAAACGTGTAAGTGCATAGCAGAGTGCAGGTGT  
ACTGGGTAGACATGTATGATTGC

>1664

CTTCTCTGAGCCCCTGTTACTTTTCTTTTAAAAATGACCACCTTGCCATGGTAATGAG  
GATAAAAAACGTGTAAGTGCATAGCAGAGTGCAGGTGTACTGGGTAGACATGTATGA  
TTGCGCTGTAGCCCCTGTTATGG

>1665

CTTTTGGAAAATGACCACCTTGTCCATGGTAATGAGGATAAAAAACGTGTAAAGTGCATA  
GCAGAGTGCAGGTGTACTGGGTAGACATGTATGATTGCGCTGTAGCCCTGTTATGGCCC  
GGGGAGAAACTATGAAAGGAAC

>1666

TTTGGAAAATGACCACCTTGTCCATGGTAATGAGGATAAAAAACGTGTAAAGTGCATAG  
CAGAGTGCAGGTGTACTGGGTAGACATGTATGATTGCGCTGTAGCCCTGTTATGGCCCG  
GGGAGAAACTATGAAAGGAACCA

>1667

ATGACCACCTTGTCCATGGTAATGAGGATAAAAAACGTGTAAAGTGCATAGCAGAGTG  
CAGGTGTACTGGGTAGACATGTATGATTGCGCTGTAGCCCTGTTATGGCCCGGGAGAA  
ACTATGAAAGGAACCAGTGAAAT

>1668

CTTGTCCATGGTAATGAGGATAAAAAACGTGTAAAGTGCATAGCAGAGTGCAGGTGTA  
CTGGGTAGACATGTATGATTGCGCTGTAGCCCTGTTATGGCCCGGGAGAAACTATGAA  
AGGAACCAGTGAAATCTTTTGTT

>1669

AAAAAACGTGTAAAGTGCATAGCAGAGTGCAGGTGTACTGGGTAGACATGTATGATTG  
CGCTGTAGCCCTGTTATGGCCCGGGAGAAACTATGAAAGGAACCAGTGAAATCTTTT  
GTTTTGGGCACTGCTAAATTGATG

>1670

GTAAGTGGGTAGACATGTATGATTGCGCTGTAGCCCTGTTATGGCCCGGGAGAAACTAT  
GAAAGGAACCAGTGAAATCTTTTGTTTTGGGCACTGCTAAATTGATGATAGTACTAACC  
CTGTGCTAGCAGCCAGCCGGTG

>1671

CATGTATGATTGCGCTGTAGCCCTGTTATGGCCCGGGAGAAACTATGAAAGGAACCA  
GTGAAATCTTTGTTTTGGGCACTGCTAAATTGATGATAGTACTAACCCTGTGCTAGCA  
GCCAGCCGGTGAAATAATAGGTG

>1672

ATGGCCCGGGGAGAAACTATGAAAGGAACCAGTGAAATCTTTGTTTTGGGCACTGCT  
AAATTGATGATAGTACTAACCCTGTGCTAGCAGCCAGCCGGTGAAATAATAGGTGAATA  
ATGTTAGTACATTGTGAATATAA

>1673

AGAAACTATGAAAGGAACCAGTGAAATCTTTGTTTTGGGCACTGCTAAATTGATGATA  
GTACTAACCCTGTGCTAGCAGCCAGCCGGTGAAATAATAGGTGAATAATGTTAGTACAT  
TGTGAATATAAAAGTTTCCATT

>1674

CCAGTGAATCTTTGTTTTGGGCACTGCTAAATTGATGATAGTACTAACCCTGTGCTAG  
CAGCCAGCCGGTGAAATAATAGGTGAATAATGTTAGTACATTGTGAATATAAAAGTTT  
CATTGCAAAGTGCTACTGCT

>1675

TTTGTTTTGGGCACTGCTAAATTGATGATAGTACTAACCCTGTGCTAGCAGCCAGCCGG  
TGAAATAATAGGTGAATAATGTTAGTACATTGTGAATATAAAAGTTTCCATTGCAAAGT  
GCTACTGCTGTTCTAAAGAAG

>1676

ACTAACCCTGTGCTAGCAGCCAGCCGGTGAAATAATAGGTGAATAATGTTAGTACATTG

TGAATATAAAAGTTTCCATTTGCAAAGTGCTACTGCTGTTCTAAAGAAGCCACATTTCT  
AATAAATGATTGCTTAATCCTG

>1677

GCAGCCAGCCGGTCAAATAATAGGTGAATAATGTTAGTACATTGTGAATATAAAAGTTT  
CCATTTGCAAAGTGCTACTGCTGTTCTAAAGAAGCCACATTTCTAATAAATGATTGCTTA  
ATCCTGTGATGCTGCCACAGC

>1678

GTGAAATAATAGGTGAATAATGTTAGTACATTGTGAATATAAAAGTTTCCATTTGCAAAG  
TGCTACTGCTGTTCTAAAGAAGCCACATTTCTAATAAATGATTGCTTAATCCTGTGATGC  
TGCCACAGCCCCACAGAGTT

>1679

AGTTTCCATTTGCAAAGTGCTACTGCTGTTCTAAAGAAGCCACATTTCTAATAAATGATT  
GCTTAATCCTGTGATGCTGCCACAGCCCCACAGAGTTTGGGAATGTTTGGGAATTCTTT  
CTGAAGTGTGTGCCGATTCT

>1680

GCTGTTCTAAAGAAGCCACATTTCTAATAAATGATTGCTTAATCCTGTGATGCTGCCACA  
GCCCCACAGAGTTTGGGAATGTTTGGGAATTCTTTCTGAAGTGTGTGCCGATTCTTTT  
GCTTTCCTTTTGGGAGGGTA

>1681

ATGATTGCTTAATCCTGTGATGCTGCCACAGCCCCACAGAGTTTGGGAATGTTTGGGAA  
TTCTTTCTGAAGTGTGTGCCGATTCTTTTCTGTTTGCCTTTTGGGAGGGTAGATGTGACT  
ATTGGAAATGGTCAAATAAT

>1682

GATTGCTTAATCCTGTGATGCTGCCACAGCCCCACAGAGTTTGGGAATGTTTGGGAATT  
CTTTCTGAAGTGTGTGCCGATTCTTTTCTGTTTGCCTTTTGGGAGGGTAGATGTGACTAT  
TGAAATGGTCAAATAATGC

>1683

AGAGTTTGGGAATGTTTGGGAATTCTTTCTGAAGTGTGTGCCGATTCTTTTCTGTTTGC  
CTTTTGGGAGGGTAGATGTGACTATTGGAAATGGTCAAATAATGCAGTAGCAAATCTG  
TTGACTATAGTGAGTGATAAGC

>1684

TTCTTTCTGAAGTGTGTGCCGATTCTTTTCTGTTTGCCTTTTGGGAGGGTAGATGTGACT  
ATTGGAAATGGTCAAATAATGCAGTAGCAAATCTGTTGACTATAGTGAGTGATAAGCA  
CTGTCCGCTGCTGTGTCTGAC

>1685

TGTGCCGATTCTTTTCTGTTTGCCTTTTGGGAGGGTAGATGTGACTATTGGAAATGGTC  
AAAATAATGCAGTAGCAAATCTGTTGACTATAGTGAGTGATAAGCACTGTCCGCTGCTG  
TGCTGACTCGGAAGGCAGATT

>1686

CTTTTCTGTTTGCCTTTTGGGAGGGTAGATGTGACTATTGGAAATGGTCAAATAATGCA  
GTAGCAAATCTGTTGACTATAGTGAGTGATAAGCACTGTCCGCTGCTGTGTCTGACTCG  
GAAGGCAGATTCTGGAAGGGT

>1687

TTGGAAATGGTCAAATAATGCAGTAGCAAATCTGTTGACTATAGTGAGTGATAAGCAC  
TGTCGGCTGCTGTGTCTGACTCGGAAGGCAGATTCTGGAAGGGGTGTGTGGGGAAGG  
CTTGTGGCTCAGCACTGGGGTGA

>1688

GGAAATGGTCAAATAATGCAGTAGCAAATCTGTTGACTATAGTGAGTGATAAGCACTG  
TCGGCTGCTGTGTCTGACTCGGAAGGCAGATTCTGGAAGGGGTGTGTGGGAAGGCT  
TGTTGGCTCAGCACTGGGGTGAGT

>1689

CTGTTGACTATAGTGAGTGATAAGCACTGTCGGCTGCTGTGTCTGACTCGGAAGGCAG  
ATTCTGGAAGGGGTGTGTGGGAAGGCTTGTGGCTCAGCACTGGGGTGAGTGTTGG  
CCTCACTTCTTAGGTGGGAAGTGA

>1690

TGATAAGCACTGTCGGCTGCTGTGTCTGACTCGGAAGGCAGATTCTGGAAGGGGTGTG  
TGGGAAGGCTTGTGGCTCAGCACTGGGGTGAGTGTTGCCTCACTTCTTAGGTGGG  
AAGTGGACAAGGCCAAGGGGCTTT

>1691

TGCTGTGTCTGACTCGGAAGGCAGATTCTGGAAGGGGTGTGTGGGAAGGCTTGTG  
GCTCAGCACTGGGGTGAGTGTTGCCTCACTTCTTAGGTGGGAAGTGGACAAGGCCA  
AGGGGCTTTTGATTTCCAGCTACTAT

>1692

GTGTCTGACTCGGAAGGCAGATTCTGGAAGGGGTGTGTGGGAAGGCTTGTGGCTC  
AGCACTGGGGTGAGTGTTGCCTCACTTCTTAGGTGGGAAGTGGACAAGGCCAAGGG  
GCTTTTGATTTCCAGCTACTATGGCT

>1693

ATTCTGGAAGGGGTGTGTGGGAAGGCTTGTGGCTCAGCACTGGGGTGAGTGTTGG  
CCTCACTTCTTAGGTGGGAAGTGGACAAGGCCAAGGGGCTTTTGATTTCCAGCTACTAT  
GGCTGGACTCCCAGTGAGGAAGGA

>1694

TCACTTCTTAGGTGGGAAGTGGACAAGGCCAAGGGGCTTTTGATTTCCAGCTACTATG  
GCTGGACTCCCAGTGAGGAAGGAGTCGCTGCCATGGATTGCCTGGGACTGGGAAGAC  
TCCTTTAACTGCTGTAATGTTTCT

>1695

GTGGGAAGTGGACAAGGCCAAGGGGCTTTTGATTTCCAGCTACTATGGCTGGACTCCC  
AGTGAGGAAGGAGTCGCTGCCATGGATTGCCTGGGACTGGGAAGACTCCTTTAACTG  
CTGTAATGTTTCTGCATTTGTGGT

>1696

CTGGACTCCCAGTGAGGAAGGAGTCGCTGCCATGGATTGCCTGGGACTGGGAAGACT  
CCTTTAACTGCTGTAATGTTTCTGCATTTGTGTTTGGCCTCCTGTGAGTTTGGGCTCC  
GGGGCGGCACTTCTGTTGTTAAA

>1697

CTCCCAGTGAGGAAGGAGTCGCTGCCATGGATTGCCTGGGACTGGGAAGACTCCTTTT  
AACTGCTGTAATGTTTCTGCATTTGTGTTTGGCCTCCTGTGAGTTTGGGCTCCGGGGC  
GGCACTTCTGTTGTTAAAAGAAC

>1698

TGGATTGCCTGGGACTGGGAAGACTCCTTTAACTGCTGTAATGTTTCTGCATTTGTGG  
TTTGGCCTCCTGTGAGTTTGGGCTCCGGGGCGGCACTTCTGTTGTTAAAAGAACAGAA  
AAGAAAACAAAACAAAACAAAAA

>1699

TTGCTGGGACTGGGAAGACTCCTTTAACTGCTGTAATGTTTCTGCATTTGTGTTTG



GCCTCCTGTGAGTTTGGGCTCCGGGGCGGCACTTCTGTTGTTAAAAGAACAGAAAAG  
AAAACAAAACAAAACAAAAACCA

>1700

TTAACTGCTGTAATGTTTCTGCATTTGTGGTTTGGCCTCCTGTGAGTTTGGGCTCCGGG  
GCGGCACTTCTGTTGTTAAAAGAACAGAAAAGAAAACAAAACAAAAACCA  
GGACTGTCCTGTTAGATGTTGGTT

>1701

GGCTCCGGGGCGGCACTTCTGTTGTTAAAAGAACAGAAAAGAAAACAAAACAAAAC  
AAAAAACAGGACTGTCCTGTTAGATGTTGGTTGAGGCTAGAAAGAATGGATTGAGT  
TTTGACCCCCTACACCCAGGGAGTA

>1702

GGGGCGGCACTTCTGTTGTTAAAAGAACAGAAAAGAAAACAAAACAAAAA  
CCAGGACTGTCCTGTTAGATGTTGGTTGAGGCTAGAAAGAATGGATTGAGTTTGGAC  
CCCCTACACCCAGGGAGTAGGGAGG

>1703

AAACAAAACAAAACAAAAAACAGGACTGTCCTGTTAGATGTTGGTTGAGGCTAGA  
AAGAATGGATTGAGTTTTGACCCCCTACACCCAGGGAGTAGGGAGGCCTGGGAGGC  
ACAGTGGCCTGAGTTGAATTCTGAC

>1704

ACTGTCCTGTTAGATGTTGGTTGAGGCTAGAAAGAATGGATTGAGTTTTGACCCCCTA  
CACCCAGGGAGTAGGGAGGCCTGGGAGGCACAGTGGCCTGAGTTTGAATTCTGACT  
CTGCCTCTTTGGAAGGCTCTGGAA

>1705

TGAGGCTAGAAAGAATGGATTGAGTTTTGACCCCCTACACCCAGGGAGTAGGGAGGC  
CTGGGAGGCACAGTGGCCTGAGTTTGAATTCTGACTCTGCCTCTTTGGAAGGCTCTGG  
AAGGTTAAAGGAGCTTGTGTGTTT

>1706

AAAGAATGGATTGAGTTTTGACCCCCTACACCCAGGGAGTAGGGAGGCCTGGGAGG  
CACAGTGGCCTGAGTTTGAATTCTGACTCTGCCTCTTTGGAAGGCTCTGGAAGGTTAA  
AGGAGCTTGTGTGTTCAAATCTTAG

>1707

TAGGGAGGCCTGGGAGGCACAGTGGCCTGAGTTTGAATTCTGACTCTGCCTCTTTGGA  
AGGCTCTGGAAGGTTAAAGGAGCTTGTGTGTTCAAATCTTAGCCTGGTACCTGGCATAT  
ACTCAGCATGATTTTTTCCCCT

>1708

GAGGCACAGTGGCCTGAGTTTGAATTCTGACTCTGCCTCTTTGGAAGGCTCTGGAAGG  
TTAAAGGAGCTTGTGTGTTCAAATCTTAGCCTGGTACCTGGCATATACTCAGCATGATT  
TTTTCCCCTTCTGACAATGT

>1709

CACAGTGGCCTGAGTTTGAATTCTGACTCTGCCTCTTTGGAAGGCTCTGGAAGGTTAA  
AGGAGCTTGTGTGTTCAAATCTTAGCCTGGTACCTGGCATATACTCAGCATGATTTTTT  
CCCCTTCTGACAATGTTCT

>1710

GAATTCTGACTCTGCCTCTTTGGAAGGCTCTGGAAGGTTAAAGGAGCTTGTGTGTTCA  
AATCTTAGCCTGGTACCTGGCATATACTCAGCATGATTTTTTCCCCTTCTGACAATGT  
TCCTTGCCCCGAACACTTGAA

>1711

GAAGGCTCTGGAAGGTTAAAGGAGCTTGTGTGTTCAAATCTTAGCCTGGTACCTGGCA  
TATACTCAGCATGTATTTTTCCCTTTCTGACAATGTTCTTGCCCCGAACACTTGAA  
TAGTGGAGAGAGGAATGTTTGC

>1712

TTGTGTGTTCAAATCTTAGCCTGGTACCTGGCATATACTCAGCATGTATTTTTCCCTTT  
CCTGACAATGTTCTTGCCCCGAACACTTGAATAGTGGAGAGAGGAATGTTTGCTTTTC  
CTCTCCATTGAACCAACT

>1713

ACCTGGCATATACTCAGCATGTATTTTTCCCTTTCTGACAATGTTCTTGCCCCGAA  
CACTTGAATAGTGGAGAGAGGAATGTTTGCTTTCTCTCCATTGAACCAACTCGCC  
CATCCACTGAGCCCAAGATTC

>1714

CAGCATGTATTTTTCCCTTTCTGACAATGTTCTTGCCCCGAACACTTGAATAGTGG  
AGAGAGGAATGTTTGCTTTCTCTCCATTGAACCAACTCGCCCATCCACTGAGCCC  
AAGATTCACCTTAGGATTGTC

>1715

AATGTTTGCTTTCTCTCCATTGAACCAACTCGCCCATCCACTGAGCCCAAGATTC  
ACCTTAGGATTGTCTGTTGGACTCGGCTCTTTGTGACCTAACAGTGCAGGGGCCTGT  
GCTGAGCTGCACATGCTCGCTC

>1716

TTTGCTTTCTCTCCATTGAACCAACTCGCCCATCCACTGAGCCCAAGATTCACCT  
TAGGATTGTCTGTTGGACTCGGCTCTTTGTGACCTAACAGTGCAGGGGCCTGTGCTG  
AGCTGCACATGCTCGCTCTCGC

>1717

TGAACCAACTCGCCCATCCACTGAGCCCAAGATTCACCTTAGGATTGTCTGTTGGA  
CTCGGCTCTTTGTGACCTAACAGTGCAGGGGCCTGTGCTGAGCTGCACATGCTCGC  
TCTCGCTGGTGCTCCCTCTCTCTC

>1718

TCGCCATCCACTGAGCCCAAGATTCACCTTAGGATTGTCTGTTGGACTCGGCTTTTT  
GTGACCTAACAGTGCAGGGGCCTGTGCTGAGCTGCACATGCTCGCTCTCGCTGGTGC  
TCCCTCTCTCTCTCTCTGT

>1719

TGGACTCGGCTCTTTGTGACCTAACAGTGCAGGGGCCTGTGCTGAGCTGCACATGC  
TCGCTCTCGCTGGTGCTCCCTCTCTCTCTCTCTGTCTGCATTATTTATAGTAAACCA  
TATTAGAACAGAGTGTTAAAG

>1720

CAGTGCAGGGGCCTGTGCTGAGCTGCACATGCTCGCTCTCGCTGGTGCTCCCTCTCT  
CTCTCTCTCTGTCTGCATTATTTATAGTAAACCATATTAGAACAGAGTGTTAAAGAGG  
AAGGATGAGTCATTCCCATTGA

>1721

TGCTGAGCTGCACATGCTCGCTCTCGCTGGTGCTCCCTCTCTCTCTCTCTGTCTG  
CATTATTTATAGTAAACCATATTAGAACAGAGTGTTAAAGAGGAAGGATGAGTCATTCC  
CATTGAAACCATTGATGACATA

>1722

CTCTCGCTGGTGCTCCCTCTCTCTCTCTCTGTCTGCATTATTTATAGTAAACCATAT

TAGAACAGAGTGTTAAAGAGGAAGGATGAGTCATTCCCATTGAAACCATTGATGACAT  
AAATAAAAAGCAAATGCTTAC

>1723

CTCGTGGTGCTCCCTCTCTCTCTCTCTGTCTGCATTATTTATAGTAAACCATATTA  
GAACAGAGTGTTAAAGAGGAAGGATGAGTCATTCCCATTGAAACCATTGATGACATAA  
ATAAAAAGCAAATGCTTACTA

>1724

CTCTCTCTCTCTGTCTGCATTATTTATAGTAAACCATATTAGAACAGAGTGTTAAAGA  
GGAAGGATGAGTCATTCCCATTGAAACCATTGATGACATAAATAAAAAGCAAATGCTTA  
CTATGTGTTTTGTGCAGTATT

>1725

TAAAGAGGAAGGATGAGTCATTCCCATTGAAACCATTGATGACATAAATAAAAAGCAA  
AATGCTTACTATGTGTTTTGTGCAGTATTTAAGGCCAGGTTGTGCTAATTTGAATGCTCC  
CAAAGTGGATCTGTGAAAGCAT

>1726

AAAGAGGAAGGATGAGTCATTCCCATTGAAACCATTGATGACATAAATAAAAAGCAA  
TGCTTACTATGTGTTTTGTGCAGTATTTAAGGCCAGGTTGTGCTAATTTGAATGCTCCA  
AACTGGATCTGTGAAAGCATAAC

>1727

ATTGAAACCATTGATGACATAAATAAAAAGCAAATGCTTACTATGTGTTTTGTGCAGTAT  
TTAAGGCCAGGTTGTGCTAATTTGAATGCTCCCAAAGTGGATCTGTGAAAGCATAACATA  
TGTGGGAAAAAATTCAGGTTT

>1728

TGCTTACTATGTGTTTTGTGCAGTATTTAAGGCCAGGTTGTGCTAATTTGAATGCTCCA  
AACTGGATCTGTGAAAGCATAACATATGTGGGAAAAAATTCAGGTTAACTAGAGGGAA  
GTTATTTATTGAAAATCCATTT

>1729

TGTGCAGTATTTAAGGCCAGGTTGTGCTAATTTGAATGCTCCCAAAGTGGATCTGTGAA  
AGCATAACATATGTGGGAAAAAATTCAGGTTAACTAGAGGGAAAGTTATTTATTGAAAAT  
CCATTTTCAAGTATCTGCTTTCTC

>1730

TGAATGCTCCCAAAGTGGATCTGTGAAAGCATAACATATGTGGGAAAAAATTCAGGTTTA  
ACTAGAGGGAAAGTTATTTATTGAAAATCCATTTTCAAGTATCTGCTTTCTCCCTTCTATTAC  
TTCAGATCCATATTCATATC

>1731

GAAAGCATAACATATGTGGGAAAAAATTCAGGTTAACTAGAGGGAAAGTTATTTATTGAA  
AATCCATTTCAAGTATCTGCTTTCTCCCTTCTATTTACTTCAGATCCATATTCATATCATGCT  
TGTTGTTCTGGCTAACGAG

>1732

TATTGAAAATCCATTTCAAGTATCTGCTTTCTCCCTTCTATTTACTTCAGATCCATATTCATA  
TCATGCTTGTGTTCTGGCTAACGAGAGGGACTGGCTTATTCACTAGCTAAGGTTTGTGTT  
TATTTTCGGAAGGTTGAGG

>1733

TGAAAATCCATTTCAAGTATCTGCTTTCTCCCTTCTATTTACTTCAGATCCATATTCATATCA  
TGCTTGTGTTCTGGCTAACGAGAGGGACTGGCTTATTCACTAGCTAAGGTTTGTGTTATT  
TTCGGAAGGTTGAGGAAT

>1734

TTCAGATCCATATTCATATCATGCTTGTTGTTCTGGCTAACGAGAGGGACTGGCTTATTC  
ACTAGCTAAGGTTTGTATTTTCGGAAGGTTGAGGAATAGCACAGAGAGGTTGTCTAA  
GTGTCCTGTCTCCATTCTCTC

>1735

GATCCATATTCATATCATGCTTGTTGTTCTGGCTAACGAGAGGGACTGGCTTATTCATA  
GCTAAGGTTTGTATTTTCGGAAGGTTGAGGAATAGCACAGAGAGGTTGTCTAAGTG  
TCCCTGTCTCCATTCTCTCTCT

>1736

CATGCTTGTTGTTCTGGCTAACGAGAGGGACTGGCTTATTCAGCTAAGGTTTGT  
ATTTTCGGAAGGTTGAGGAATAGCACAGAGAGGTTGTCTAAGTGCCCTGTCTCCATTC  
CTCCTCTTGCCACCTGTTGAGG

>1737

GAGGGACTGGCTTATTCAGCTAAGGTTTGTATTTTCGGAAGGTTGAGGAATAGC  
ACAGAGAGGTTGTCTAAGTGCCCTGTCTCCATTCTCTCTTGCCACCTGTTGAGGAA  
GGCACTCTCCACCTGCTTTGCA

>1738

TTCAGCTAAGGTTTGTATTTTCGGAAGGTTGAGGAATAGCACAGAGAGGTTGTC  
TAAGTGCCCTGTCTCCATTCTCTCTTGCCACCTGTTGAGGAAGGCACTCTCCACCT  
GCTTTGCAGGCGTGGGCTCTCA

>1739

TCGGAAGGTTGAGGAATAGCACAGAGAGGTTGTCTAAGTGCCCTGTCTCCATTCTCT  
CTCTTGCCACCTGTTGAGGAAGGCACTCTCCACCTGCTTTGCAGGCGTGGGCTCTCAA  
TGTGTCCAAGAATCACAGTCAGAG

>1740

TAAGTGCCCTGTCTCCATTCTCTCTTGCCACCTGTTGAGGAAGGCACTCTCCACCT  
GCTTTGCAGGCGTGGGCTCTCAATGTGTCCAAGAATCACAGTCAGAGCTGAAGGGCCC  
TTGGAATCATTTATTGCAGCATG

>1741

CTCATTCTCTCTTGCCACCTGTTGAGGAAGGCACTCTCCACCTGCTTTGCAGGCGT  
GGGCTCTCAATGTGTCCAAGAATCACAGTCAGAGCTGAAGGGCCCTTGAATCATTTA  
TTGCAGCATGCTCATTGGGAGG

>1742

GCCACCTGTTGAGGAAGGCACTCTCCACCTGCTTTGCAGGCGTGGGCTCTCAATGTGT  
CCAAGAATCACAGTCAGAGCTGAAGGGCCCTTGAATCATTTATTGCAGCATGCTCATT  
TGGGAGGAGTAAGTGGAGGTCCA

>1743

TGTCCAAGAATCACAGTCAGAGCTGAAGGGCCCTTGAATCATTTATTGCAGCATGCTC  
ATTTGGGAGGAGTAAGTGGAGGTCCAGAGAGGTTCTGTGATTTCCCTAGGTCACACA  
GCAAGCTAGAGGCAAAACCAGGA

>1744

CAAGAATCACAGTCAGAGCTGAAGGGCCCTTGAATCATTTATTGCAGCATGCTCATT  
GGGAGGAGTAAGTGGAGGTCCAGAGAGGTTCTGTGATTTCCCTAGGTCACACAGCA  
AGCTAGAGGCAAAACCAGGACCT

>1745

TCATTTATTGCAGCATGCTCATTGGGAGGAGTAAGTGGAGGTCCAGAGAGGTTCTGT

GATTTTCCCTAGGTACACAGCAAGCTAGAGGCAAACCAGGACCCTCACTCCCAGCC  
CACTTTAATTCTTCCTTACAAGC

>1746

CAGCAAGCTAGAGGCAAACCAGGACCCTCACTCCCAGCCCCTTTAATTCTTCCTTC  
ACAAGCCTGCCTGTGACTGCCAGGTCTGTTCTCTGCTTCTACCAAGGGGTAGGCAAG  
ACTAGAATCTGACTTGAGAGCAGT

>1747

GGCAAACCAGGACCCTCACTCCCAGCCCCTTTAATTCTTCCTTACAAGCCTGCCT  
GTGACTGCCAGGTCTGTTCTCTGCTTCTACCAAGGGGTAGGCAAGACTAGAATCTGA  
CTTGAGAGCAGTTTCAGATCTTTG

>1748

GCCCACTTTAATTCTTCCTTACAAGCCTGCCTGTGACTGCCAGGTCTGTTCTCTGCT  
TCTACCAAGGGGTAGGCAAGACTAGAATCTGACTTGAGAGCAGTTTCAGATCTTTGTC  
TGTGAGGGATGCTGGGGGGTTTC

>1749

CTGTGACTGCCAGGTCTGTTCTCTGCTTCTACCAAGGGGTAGGCAAGACTAGAATCT  
GACTTGAGAGCAGTTTCAGATCTTTGTCTGTGAGGGATGCTGGGGGGTTTCTGGCATG  
GTGACTTGCTCCTGGGACTCA

>1750

GGTCTGTTCTCTGCTTCTACCAAGGGGTAGGCAAGACTAGAATCTGACTTGAGAGCAG  
TTTCAGATCTTTGTCTGTGAGGGATGCTGGGGGGTTTCTGGCATGGTGACTTGCTCCT  
GGGACTCATTAACTCTCTGC

>1751

AAGGGGTAGGCAAGACTAGAATCTGACTTGAGAGCAGTTTCAGATCTTTGTCTGTGAG  
GGATGCTGGGGGGTTTCTGGCATGGTGACTTGCTCCTGGGACTCATTAACTCTCT  
GCTGCTGAGCCTGAGCAGACTAA

>1752

AGACTAGAATCTGACTTGAGAGCAGTTTCAGATCTTTGTCTGTGAGGGATGCTGGGGG  
GTTTCTGGCATGGTGACTTGCTCCTGGGACTCATTAACTCTCTGCTGCTGAGCCT  
GAGCAGACTAATGTACATCAACT

>1753

TTTCTGGCATGGTGACTTGCTCCTGGGACTCATTAACTCTCTGCTGCTGAGCCTG  
AGCAGACTAATGTACATCAACTCCTTAGGATTTACAGACAATGCCCTATGTTGGGGTT  
TTGAGACCCAAAGATTGCTAAG

>1754

ACCTCTCTGCTGCTGAGCCTGAGCAGACTAATGTACATCAACTCCTTAGGATTTACAGA  
CAATGCCCTATGTTGGGGGTTTTGAGACCCAAAGATTGCTAAGACATGGGACTTTTCCT  
TGAAGAGCTTATACTTTGAGTT

>1755

TGCTGCTGAGCCTGAGCAGACTAATGTACATCAACTCCTTAGGATTTACAGACAATGCC  
CTATGTTGGGGGTTTTGAGACCCAAAGATTGCTAAGACATGGGACTTTTCCTGAAGA  
GCTTATACTTTGAGTTAAAATAT

>1756

TATGTTGGGGGTTTTGAGACCCAAAGATTGCTAAGACATGGGACTTTTCCTGAAGAG  
CTTATACTTTGAGTTAAAATATGTATGTTGATATCTATGACAGAGAATAGGAAATGGAAA  
GACTATGATATATATTCAGA

>1757

GTTTTGAGACCCAAAGATTGCTAAGACATGGGACTTTTCCTTGAAGAGCTTATACTTTG  
AGTTAAAATATGTATGTTGATATCTATGACAGAGAATAGGAAATGGAAAGACTATGATAT  
ATATATTCAGAGTTGAAATGA

>1758

TGAGACCCAAAGATTGCTAAGACATGGGACTTTTCCTTGAAGAGCTTATACTTTGAGTT  
AAAATATGTATGTTGATATCTATGACAGAGAATAGGAAATGGAAAGACTATGATATATATA  
TTCAGAGTTGAAATGACTTC

>1759

GTTAAAATATGTATGTTGATATCTATGACAGAGAATAGGAAATGGAAAGACTATGATATA  
TATATTCAGAGTTGAAATGACTTCTGTCTGGAGTGATTCATTTTAAATTTTAAAACCTTG  
TTGAGCACTTACTGTCTGCT

>1760

TTGATATCTATGACAGAGAATAGGAAATGGAAAGACTATGATATATATATTCAGAGTTGA  
AATGACTTCTGTCTGGAGTGATTCATTTTAAATTTTAAAACCTTGTTGAGCACTTACTGT  
CTGCTGGGCACCTGGGTAGG

>1761

ACTATGATATATATATTCAGAGTTGAAATGACTTCTGTCTGGAGTGATTCATTTTAAATTT  
TAAAACCTTGTTGAGCACTTACTGTCTGCTGGGCACCTGGGTAGGCCCTGGGAATACT  
GTGATGAGCAAGATAGACAAG

>1762

ATTCAGAGTTGAAATGACTTCTGTCTGGAGTGATTCATTTTAAATTTTAAAACCTTGTTG  
AGCACTTACTGTCTGCTGGGCACCTGGGTAGGCCCTGGGAATACTGTGATGAGCAAGA  
TAGACAAGACGTCTACCCTCT

>1763

CTTCTGTCTGGAGTGATTCATTTTAAATTTTAAAACCTTGTTGAGCACTTACTGTCTGCT  
GGGCACCTGGGTAGGCCCTGGGAATACTGTGATGAGCAAGATAGACAAGACGTCTACC  
CTCCTGGGGCTTTCCTAATGGG

>1764

CATTTTAAATTTTAAAACCTTGTTGAGCACTTACTGTCTGCTGGGCACCTGGGTAGGCC  
CTGGGAATACTGTGATGAGCAAGATAGACAAGACGTCTACCCTCCTGGGGCTTTCCTAA  
TGGGGAAGAAAGATCCTTACTT

>1765

TGAGCACTTACTGTCTGCTGGGCACCTGGGTAGGCCCTGGGAATACTGTGATGAGCAA  
GATAGACAAGACGTCTACCCTCCTGGGGCTTTCCTAATGGGGAAGAAAGATCCTTACTT  
AGCTAGCAGTCCTGTCCGTAAC

>1766

CAAGATAGACAAGACGTCTACCCTCCTGGGGCTTTCCTAATGGGGAAGAAAGATCCTT  
ACTTAGCTAGCAGTCCTGTCCGTAACGTGTAAGGGTGATTTGATACATGTTGGGAGC  
CTGGATGAAGCAGCACATGAGTA

>1767

TAGACAAGACGTCTACCCTCCTGGGGCTTTCCTAATGGGGAAGAAAGATCCTTACTTAG  
CTAGCAGTCCTGTCCGTAACGTGTAAGGGTGATTTGATACATGTTGGGAGCCTGGAT  
GAAGCAGCACATGAGTAGGATA

>1768

GTCTACCCTCCTGGGGCTTTCCTAATGGGGAAGAAAGATCCTTACTTAGCTAGCAGTCC

TGTCCGTAAGTGTGTAAGGGTGATTTTGATACATGTTGGGAGCCTGGATGAAGCAGCAC  
ATGAGTAGGATATTAAGGATA

>1769

AATGGGGAAGAAAGATCCTTACTTAGCTAGCAGTCCTGTCCGTAAGTGTGTAAGGGTG  
ATTTTGATACATGTTGGGAGCCTGGATGAAGCAGCACATGAGTAGGATATTAAGGATA  
AGTAGGTTTTGAAGACGGGGACA

>1770

GCAGTCTGTCCGTAAGTGTGTAAGGGTGATTTTGATACATGTTGGGAGCCTGGATGAA  
GCAGCACATGAGTAGGATATTAAGGATAAGTAGGTTTTGAAGACGGGGACAGAAAGA  
AGGAAAATTGTGGTCAGGGCCAG

>1771

TGTAAGGGTGATTTTGATACATGTTGGGAGCCTGGATGAAGCAGCACATGAGTAGGATA  
TTAAAGGATAAGTAGGTTTTGAAGACGGGGACAGAAAGAAGGAAAATTGTGGTCAGG  
GCCAGGGGAGAAAACAAGGAGTAA

>1772

GAAGCAGCACATGAGTAGGATATTAAGGATAAGTAGGTTTTGAAGACGGGGACAGAA  
AGAAGGAAAATTGTGGTCAGGGCCAGGGGAGAAAACAAGGAGTAACTTTCTTTGGCA  
GGAATGAGGGTGATTCATGCTGGAA

>1773

GCAGCACATGAGTAGGATATTAAGGATAAGTAGGTTTTGAAGACGGGGACAGAAAGA  
AGGAAAATTGTGGTCAGGGCCAGGGGAGAAAACAAGGAGTAACTTTCTTTGGCAGGA  
ATGAGGGTGATTCATGCTGGAATGG

>1774

ATAAGTAGGTTTTGAAGACGGGGACAGAAAGAAGGAAAATTGTGGTCAGGGCCAGGG  
GAGAAAACAAGGAGTAACTTTCTTTGGCAGGAATGAGGGTGATTCATGCTGGAATGGT  
AGGCTGGGGTCAGACTGTGGTGCTA

>1775

AGAAAAGAAGGAAAATTGTGGTCAGGGCCAGGGGAGAAAACAAGGAGTAACTTTCTTT  
GGCAGGAATGAGGGTGATTCATGCTGGAATGGTAGGCTGGGGTCAGACTGTGGTGCTA  
TAAATGCGGGGAGAGAGATTAGAGA

>1776

GGTCAGGGCCAGGGGAGAAAACAAGGAGTAACTTTCTTTGGCAGGAATGAGGGTGAT  
TCATGCTGGAATGGTAGGCTGGGGTCAGACTGTGGTGCTATAAATGCGGGGAGAGAGA  
TTAGAGAAGGCAGCATGAAGAATGG

>1777

AGGGGAGAAAACAAGGAGTAACTTTCTTTGGCAGGAATGAGGGTGATTCATGCTGGA  
ATGGTAGGCTGGGGTCAGACTGTGGTGCTATAAATGCGGGGAGAGAGATTAGAGAAGG  
CAGCATGAAGAATGGAGAGAAAATG

>1778

TCAGACTGTGGTGCTATAAATGCGGGGAGAGAGATTAGAGAAGGCAGCATGAAGAATG  
GAGAGAAAATGAGTTTGAAGTTGAGCAGACCCGGGTTTCAGATTTTCATGCTGCCACTT  
GCAAAGTGTGTGATGTTGGCCATC

>1779

GTGGTGCTATAAATGCGGGGAGAGAGATTAGAGAAGGCAGCATGAAGAATGGAGAGA  
AAATGAGTTTGAAGTTGAGCAGACCCGGGTTTCAGATTTTCATGCTGCCACTTGCAAAC  
TGTGTGATGTTGGCCATCAAGGACT

>1780

CGGGGAGAGAGATTAGAGAAGGCAGCATGAAGAATGGAGAGAAAATGAGTTTGAAGT  
TGAGCAGACCCGGGTTTCAGATTTTCATGCTGCCACTTGCAAAGTGTGTGATGTTGGCCA  
TCAAGGACTGTGAACTGGCTGGGT

>1781

GAATGGAGAGAAAATGAGTTTGAAGTTGAGCAGACCCGGGTTTCAGATTTTCATGCTGC  
CACTTGCAAAGTGTGTGATGTTGGCCATCAAGGACTGTGAACTGGCTGGGTGCAGTGG  
CTCACACCTGTCATCCCAGTGCTT

>1782

GAGAAAATGAGTTTGAAGTTGAGCAGACCCGGGTTTCAGATTTTCATGCTGCCACTTGC  
AAACTGTGTGATGTTGGCCATCAAGGACTGTGAACTGGCTGGGTGCAGTGGCTCACAC  
CTGTCATCCCAGTGCTTTGGGAGG

>1783

GTTGAGCAGACCCGGGTTTCAGATTTTCATGCTGCCACTTGCAAAGTGTGTGATGTTGG  
CCATCAAGGACTGTGAACTGGCTGGGTGCAGTGGCTCACACCTGTCATCCCAGTGCTT  
TGGGAGGCCAAGGCAGGAGGATTG

>1784

GGGTTTCAGATTTTCATGCTGCCACTTGCAAAGTGTGTGATGTTGGCCATCAAGGACTGT  
GAACTGGCTGGGTGCAGTGGCTCACACCTGTCATCCCAGTGCTTTGGGAGGCCAAGG  
CAGGAGGATTGCGTGAGGCCAGAA

>1785

CAGATTTTCATGCTGCCACTTGCAAAGTGTGTGATGTTGGCCATCAAGGACTGTGAACT  
GGCTGGGTGCAGTGGCTCACACCTGTCATCCCAGTGCTTTGGGAGGCCAAGGCAGGA  
GGATTGCGTGAGGCCAGAAGTTT

>1786

CAAACTGTGTGATGTTGGCCATCAAGGACTGTGAACTGGCTGGGTGCAGTGGCTCACA  
CCTGTCATCCCAGTGCTTTGGGAGGCCAAGGCAGGAGGATTGCGTGAGGCCAGAAGT  
TTGAGACTGGCTTGGGCAATATAGC

>1787

TGAACTGGCTGGGTGCAGTGGCTCACACCTGTCATCCCAGTGCTTTGGGAGGCCAAGG  
CAGGAGGATTGCGTGAGGCCAGAAGTTTGGACTGGCTTGGGCAATATAGCGAGACG  
ATCTTTCCAAAAAAAAAAAAAAAAAAAA

>1788

GTGCAGTGGCTCACACCTGTCATCCCAGTGCTTTGGGAGGCCAAGGCAGGAGGATTGC  
GTGAGGCCAGAAGTTTGGACTGGCTTGGGCAATATAGCGAGACGATCTTTCCAAAAA  
AAAAAAAAAAAAAAAAAATTAATAATGC

>1789

GAGACTGGCTTGGGCAATATAGCGAGACGATCTTTCCAAAAAAAAAAAAAAAAAAAAAATT  
AAAAATGCAGCTGTGCATGCCATAATCCAGCTTCTCGGGTGGCTGAAGAGGGAGGA  
TGGCTTGAAGTTATAAGTTCAAGG

>1790

GATCTTTCCAAAAAAAAAAAAAAAAAAAAAATTAATAATGCAGCTGTGCATGCCATAATC  
CCAGCTTCTCGGGTGGCTGAAGAGGGAGGATGGCTTGAAGTTATAAGTTCAAGGCTGT  
GGTGAGCTATGATCACGCCACTGC

>1791

ATGCAGCTGTGCATGCCATAATCCAGCTTCTCGGGTGGCTGAAGAGGGAGGATGGC



TTGAACTTATAAGTTCAAGGCTGTGGTGAGCTATGATCACGCCACTGCACTCCAGCCTG  
GGCAACAAAGTGAGACCCTATCT

>1792

GCATGCCATAATCCCAGCTTCTCGGGTGGCTGAAGAGGGAGGATGGCTTGAACCTATA  
AGTTCAAGGCTGTGGTGAGCTATGATCACGCCACTGCACTCCAGCCTGGGCAACAAAG  
TGAGACCCTATCTCTATTTCAA

>1793

GCTTGAACCTATAAGTTCAAGGCTGTGGTGAGCTATGATCACGCCACTGCACTCCAGCC  
TGGGCAACAAAGTGAGACCCTATCTCTATTTCAAACAACAACAACAACAGCAA  
CACACACCATGAACTGTAGCTTCT

>1794

GGCAACAAAGTGAGACCCTATCTCTATTTCAAACAACAACAACAACAGCAACA  
CACACCATGAACTGTAGCTTCTTCATTCTACAGTGCAGTTATTGTGTGGGATAGCCTG  
AGGATTTGGGGTCGTGACTTAAC

>1795

TCTCTATTTCAAACAACAACAACAACAGCAACACACACCATGAACTGTAGCTTC  
TTCATTCTACAGTGCAGTTATTGTGTGGGATAGCCTGAGGATTTGGGGTCGTGACTTA  
ACACACTCTGCACAGTGCCTGT

>1796

ATTTCAAACAACAACAACAACAGCAACACACACCATGAACTGTAGCTTCTTCAT  
TCCTACAGTGCAGTTATTGTGTGGGATAGCCTGAGGATTTGGGGTCGTGACTTAACAC  
ACTCTGCACAGTGCCTGTAACAG

>1797

AAACAACAACAACAACAGCAACACACACCATGAACTGTAGCTTCTTCATTCTAC  
AGTGCAGTTATTGTGTGGGATAGCCTGAGGATTTGGGGTCGTGACTTAACACACTCTG  
CACAGTGCCTGTAACAGTGTAGT

>1798

ACACACCATGAACTGTAGCTTCTTCATTCTACAGTGCAGTTATTGTGTGGGATAGCCT  
GAGGATTTGGGGTCGTGACTTAACACACTCTGCACAGTGCCTGTAACAGTGTAGTTG  
CTCAATAAATATAACTGCTGTTT

>1799

TTCCTACAGTGCAGTTATTGTGTGGGATAGCCTGAGGATTTGGGGTCGTGACTTAACA  
CACTCTGCACAGTGCCTGTAACAGTGTAGTTGCTCAATAAATATAACTGCTGTTTGT  
AACTGCTGTTTCTTTTGGAC

>1800

CAGTGCAGTTATTGTGTGGGATAGCCTGAGGATTTGGGGTCGTGACTTAACACACTCT  
GCACAGTGCCTGTAACAGTGTAGTTGCTCAATAAATATAACTGCTGTTTGTTTAACTG  
CTGTTTCTTTTGGACTTTATC

>1801

AGTTATTGTGTGGGATAGCCTGAGGATTTGGGGTCGTGACTTAACACACTCTGCACAG  
TGCCTGTAACAGTGTAGTTGCTCAATAAATATAACTGCTGTTTGTTTAACTGCTGTTT  
TTTTTGGACTTTATCCCGGA

>1802

TGGGGTCGTGACTTAACACACTCTGCACAGTGCCTGTAACAGTGTAGTTGCTCAATAA  
ATATAACTGCTGTTTGTTTAACTGCTGTTTCTTTTGGACTTTATCCCGGGAGAGTTGG  
AGCCTTGAAGGCATTTGAAA

>1803

GTAGTTGCTCAATAAATAACTGCTGTTTGTTTAACTGCTGTTTCTTTTTGGACTTTAT  
CCCGGGAGAGTTGGAGCCTTGAAGGCATTTGAAAAGGAGAGTGACGTGACTGGAGT  
GCTCCATACTGATGTGACATCC

>1804

TTAACTGCTGTTTCTTTTTGGACTTTATCCCGGGAGAGTTGGAGCCTTGAAGGCATT  
TGAAAAGGAGAGTGACGTGACTGGAGTGCTCCATACTGATGTGACATCCACTAGGCAT  
GTGTCTGACTGCCCCCTGCTCCT

>1805

CTTTTTGGACTTTATCCCGGGAGAGTTGGAGCCTTGAAGGCATTTGAAAAGGAGAGT  
GACGTGACTGGAGTGCTCCATACTGATGTGACATCCACTAGGCATGTGTCTGACTGCCC  
CCTGCTCCTTCCCTGCCTTCACG

>1806

CCCGGGAGAGTTGGAGCCTTGAAGGCATTTGAAAAGGAGAGTGACGTGACTGGAGT  
GCTCCATACTGATGTGACATCCACTAGGCATGTGTCTGACTGCCCCCTGCTCCTTCCCT  
GCCTTCACGAGCCTGTCTGAAAAG

>1807

TTGGAAGGCATTTGAAAAGGAGAGTGACGTGACTGGAGTGCTCCATACTGATGTGACA  
TCCACTAGGCATGTGTCTGACTGCCCCCTGCTCCTTCCCTGCCTTCACGAGCCTGTCTG  
AAAAGGAGTTTAGTGCGTGATCA

>1808

CCATACTGATGTGACATCCACTAGGCATGTGTCTGACTGCCCCCTGCTCCTTCCCTGCC  
TTCACGAGCCTGTCTGAAAAGGAGTTTAGTGCGTGATCATCAGCTCCTAAGGAGACCT  
CTCCCCTGTATCTTGTACCTGGC

>1809

GACATCCACTAGGCATGTGTCTGACTGCCCCCTGCTCCTTCCCTGCCTTCACGAGCCTG  
TCTGAAAAGGAGTTTAGTGCGTGATCATCAGCTCCTAAGGAGACCTCTCCCCTGTATCT  
TGTACCTGGCACTCTACCAAGA

>1810

CTGCCTTCACGAGCCTGTCTGAAAAGGAGTTTAGTGCGTGATCATCAGCTCCTAAGGA  
GACCTCTCCCCTGTATCTTGTACCTGGCACTCTACCAAGATTTGATGAAAGGACATGAA  
ATGGACCCTTGCCACCTCTCGGT

>1811

CACGAGCCTGTCTGAAAAGGAGTTTAGTGCGTGATCATCAGCTCCTAAGGAGACCTCT  
CCCCTGTATCTTGTACCTGGCACTCTACCAAGATTTGATGAAAGGACATGAAATGGACC  
CTTGCCACCTCTCGGTGGGCGGG

>1812

CTGTATCTTGTACCTGGCACTCTACCAAGATTTGATGAAAGGACATGAAATGGACCCTT  
GCCACCTCTCGGTGGGCGGGGAAGCTGGGAGAGGGGCCTGGGGAGAGGGGGTCTTC  
AGCTGTCAGGATCAAAGGAAGTGAC

>1813

AGGACATGAAATGGACCCTTGCCACCTCTCGGTGGGCGGGGAAGCTGGGAGAGGGGC  
CTGGGGAGAGGGGGTCTTCAGCTGTCAGGATCAAAGGAAGTGACACTCTGAAGCTGG  
TCTGCCGGACTGTTACCCGTCTCTT

>1814

ATGGACCCTTGCCACCTCTCGGTGGGCGGGGAAGCTGGGAGAGGGGCCTGGGGAGAG

GGGGTCTTCAGCTGTCAGGATCAAAGGAAGTGACTCTGAAGCTGGTCTGCCGGAC  
TGTTACCCGTCTCTCTAACTCTCTTT

>1815

TCTCGGTGGGCGGGGAAGCTGGGAGAGGGGCCTGGGGAGAGGGGTCTTCAGCTGTC  
AGGATCAAAGGAAGTGACTCTGAAGCTGGTCTGCCGGACTGTTACCCGTCTCTCTA  
ACTCTCTTTTAATAGAAACCCAGTC

>1816

GAGAGGGGGTCTTCAGCTGTCAGGATCAAAGGAAGTGACTCTGAAGCTGGTCTGC  
CGGACTGTTACCCGTCTCTCTAACTCTCTTTTAATAGAAACCCAGTCTCCCTCTTGCCT  
CCCTGATAGTGAACAGCGACGCT

>1817

GAAGTGACTCTGAAGCTGGTCTGCCGGACTGTTACCCGTCTCTCTAACTCTCTTTTA  
ATAGAAACCCAGTCTCCCTCTTGCCTCCCTGATAGTGAACAGCGACGCTATCTCCCGC  
GGCCAGTCTCGGCTGTGGTCG

>1818

GCCGGACTGTTACCCGTCTCTCTAACTCTCTTTTAATAGAAACCCAGTCTCCCTCTTG  
CCTCCCTGATAGTGAACAGCGACGCTATCTCCCGCGGGCCAGTCTCGGCTGTGGTCGT  
AGCACTACGCAATGTCTGCAAAC

>1819

TTTTAATAGAAACCCAGTCTCCCTCTTGCCTCCCTGATAGTGAACAGCGACGCTATCT  
CCCGCGGGCCAGTCTCGGCTGTGGTCGTAGCACTACGCAATGTCTGCAAACCGACAGT  
GGCATGGGGAGATAAGGGCCCA

>1820

AAACCCAGTCTCCCTCTTGCCTCCCTGATAGTGAACAGCGACGCTATCTCCCGCGGG  
CCAGTCTCGGCTGTGGTCGTAGCACTACGCAATGTCTGCAAACCGACAGTGGCATGGG  
GAGATAAGGGCCCAACGTTGTGT

>1821

CTCCCTGATAGTGAACAGCGACGCTATCTCCCGCGGGCCAGTCTCGGCTGTGGTCGTA  
GCACTACGCAATGTCTGCAAACCGACAGTGGCATGGGGAGATAAGGGCCCAACGTT  
GTGTAACGAGGGGCATGGGCTGTTT

>1822

CAGCGACGCTATCTCCCGCGGGCCAGTCTCGGCTGTGGTCGTAGCACTACGCAATGTC  
TGCAAACCGACAGTGGCATGGGGAGATAAGGGCCCAACGTTGTGTAACGAGGGGCA  
TGGGCTGTTTGCCCGAGTGGCTCCT

>1823

CTCGGCTGTGGTCGTAGCACTACGCAATGTCTGCAAACCGACAGTGGCATGGGGAGAT  
AAGGGCCCAACGTTGTGTAACGAGGGGCATGGGCTGTTTGCCCGAGTGGCTCCTGGC  
CCCTGGGTAACCTGCTAACCTCAAC

>1824

CAATGTCTGCAAACCGACAGTGGCATGGGGAGATAAGGGCCCAACGTTGTGTAACG  
AGGGGCATGGGCTGTTTGCCCGAGTGGCTCCTGGCCCCTGGGTAACCTGCTAACCTCAA  
CGGAGGAGCGGGCCGCCTTGAAAA

>1825

AAACCGACAGTGGCATGGGGAGATAAGGGCCCAACGTTGTGTAACGAGGGGCATGG  
GCTGTTTGCCCGAGTGGCTCCTGGCCCCTGGGTAACCTGCTAACCTCAACGAGGAGCG  
GGCCGGCCTTGAAACGCCGTTCCA

>1826

GGAGATAAGGGCCCCAACGTTGTGTAACGAGGGGCATGGGCTGTTTGCCGAGTGGCT  
CCTGGCCCCTGGGTAAGTCTAACCTCAACGGAGGAGCGGGCCGGCCTTGAAACGC  
CGTCCAGGGCCCCTCGCTGGTTCC

>1827

GCCCAGTGGCTCCTGGCCCCTGGGTAAGTCTAACCTCAACGGAGGAGCGGGCCGG  
CCTTGAAACGCCGTTCCAGGGCCCCTCGCTGGTTCCACGGATGCCTTTTTGTGGTTG  
GATAAAGGAAGCTCATGTAGGCCGC

>1828

CCTGGGTAAGTCTAACCTCAACGGAGGAGCGGGCCGGCCTTGAAACGCCGTTCCA  
GGGCCCCTCGCTGGTTCCACGGATGCCTTTTTGTGGTTGGATAAAGGAAGCTCATGTAG  
GCCGCCACAGCGCAGCATGGCCT

>1829

CGGAGGAGCGGGCCGGCCTTGAAACGCCGTTCCAGGGCCCCTCGCTGGTTCCACGG  
ATGCCTTTTTGTGGTTGGATAAAGGAAGCTCATGTAGGCCGCCACAGCGCAGCATGG  
CCTTGGGCTACGGGTGTTTGGTTGT

>1830

GGAAACGCCGTTCCAGGGCCCCTCGCTGGTTCCACGGATGCCTTTTTGTGGTTGGATA  
AAGGAAGCTCATGTAGGCCGCCACAGCGCAGCATGGCCTTGGGCTACGGGTGTTTGG  
TTGTTTTGTTTTCTTTTTCTTT

>1831

TGCCTTTTTGTGGTTGGATAAAGGAAGCTCATGTAGGCCGCCACAGCGCAGCATGGC  
CTTGGGCTACGGGTGTTTGGTTGTTTTGTTTTCTTTTTCTTTTGTCTTTTTTAAAAAA  
GAAGTTGAAAGGGGGATAGTCT

>1832

CCTTTTTGTGGTTGGATAAAGGAAGCTCATGTAGGCCGCCACAGCGCAGCATGGCCT  
TGGGCTACGGGTGTTTGGTTGTTTTGTTTTCTTTTTCTTTTGTCTTTTTTAAAAAAGA  
AGTTGAAAGGGGGATAGTCTTG

>1833

TTGTGGTTGGATAAAGGAAGCTCATGTAGGCCGCCACAGCGCAGCATGGCCTTGGGC  
TACGGGTGTTTGGTTGTTTTGTTTTCTTTTTCTTTTGTCTTTTTTAAAAAAGAAGTTG  
AAAGGGGGATAGTCTTGCTTGG

>1834

GGATAAAGGAAGCTCATGTAGGCCGCCACAGCGCAGCATGGCCTTGGGCTACGGGTG  
TTTGGTTGTTTTGTTTTCTTTTTCTTTTGTCTTTTTTAAAAAAGAAGTTGAAAGGGG  
GATAGTCTTGCTTGGCACCTACC

>1835

GTAGGCCGCCACAGCGCAGCATGGCCTTGGGCTACGGGTGTTTGGTTGTTTTGTTTT  
CTTTTTCTTTGTCTTTTTTAAAAAAGAAGTTGAAAGGGGGATAGTCTTGCTTGGCAC  
CTACCACCTTTAACCCAAAACC

>1836

ACGGGTGTTTGGTTGTTTTGTTTTCTTTTTCTTTTGTCTTTTTTAAAAAAGAAGTTGA  
AAGGGGGATAGTCTTGCTTGGCACCTACCACCTTTAACCCAAAACCAAATAAAACAAA  
CAGTTCCTAAATATAAATAAA

>1837

AAGAAGTTGAAAGGGGGATAGTCTTGCTTGGCACCTACCACCTTTAACCCAAAACCAA

ATAAAACAAACAGTTCCTAAATATAAATTAACCTCAACCTGCAGTATAGACATCCTCCT  
TCCCTGCCCCGAAACCCACTGGC

>1838

ACCTACCACCTTTAACCCAAAACCAAATAAAACAAACAGTTCCTAAATATAAATTAAC  
TTCAACCTGCAGTATAGACATCCTCCTCCCTGCCGAAACCCACTGGCCACTGGAGG  
CTAGCTTTAAGAAATTGGTTTTG

>1839

CCTGCAGTATAGACATCCTCCTCCCTGCCGAAACCCACTGGCCACTGGAGGCTAGCT  
TTAAGAAATTGGTTTTGGAGACTCTGGCTTGAAAAGGAGCCATGCCCACTTGTCTCAC  
GTCCCAGTCGCTGGCTCCAGGGG

>1840

TGGCCACTGGAGGCTAGCTTTAAGAAATTGGTTTTGGAGACTCTGGCTTGAAAAGGAG  
CCATGCCCACTTGTCTCACGTCCCAGTCGCTGGCTCCAGGGGGCCGTGGTAGAACATAT  
ATTGACTTCAGCTGCCTTTCCC

>1841

TGGAGGCTAGCTTTAAGAAATTGGTTTTGGAGACTCTGGCTTGAAAAGGAGCCATGCC  
CACTTGTCTCACGTCCCAGTCGCTGGCTCCAGGGGGCCGTGGTAGAACATATATTGTAC  
TTCAGCTGCCTTTCCCCTCCAAG

>1842

TTGGAGACTCTGGCTTGAAAAGGAGCCATGCCCACTTGTCTCACGTCCCAGTCGCTGG  
CTCCAGGGGGCCGTGGTAGAACATATATTGACTTCAGCTGCCTTTCCCCTCCAAGCTT  
CCTCAGCCACCCACAGCCCTTTC

>1843

AAAAGGAGCCATGCCCACTTGTCTCACGTCCCAGTCGCTGGCTCCAGGGGGCCGTGGT  
AGAACATATATTGACTTCAGCTGCCTTTCCCCTCCAAGCTTCCCTCAGCCACCCACAGC  
CCTTTCAGATGAGCTGAGCCCTA

>1844

TCAGCTGCCTTTCCCCTCCAAGCTTCCCTCAGCCACCCACAGCCCTTTCAGATGAGCTG  
AGCCCTAGCACTGTGCCCTCTCCCCTCTGCCCTCTTAGGGTGATAGAATCCACTACCCT  
GACATCTGGGGTTGCCCTGTTCT

>1845

TCAGCCACCCACAGCCCTTTCAGATGAGCTGAGCCCTAGCACTGTGCCCTCTCCCCTCT  
GCCCTCTTAGGGTGATAGAATCCACTACCCTGACATCTGGGGTTGCCCTGTTCTGCTGT  
GGTGGGAGATGGGCTGGAAGGG

>1846

GAGCCCTAGCACTGTGCCCTCTCCCCTCTGCCCTCTTAGGGTGATAGAATCCACTACCC  
TGACATCTGGGGTTGCCCTGTTCTGCTGTGGTGGGAGATGGGCTGGAAGGGACTTCGG  
AGGCTCTCCCGTGTCTGTACCA

>1847

GCACTGTGCCCTCTCCCCTCTGCCCTCTTAGGGTGATAGAATCCACTACCCTGACATCT  
GGGGTTGCCCTGTTCTGCTGTGGTGGGAGATGGGCTGGAAGGGACTTCGGAGGCTCTC  
CCGTGTTCTGTACCACCCAGCTT

>1848

CCTGACATCTGGGGTTGCCCTGTTCTGCTGTGGTGGGAGATGGGCTGGAAGGGACTTC  
GGAGGCTCTCCCGTGTCTGTACCACCCAGCTTCCCCTGGATCCCTCCACCCCGCAG  
CCAGGAGAGGGAAGTAACTGTTT

>1849

TGACATCTGGGGTTGCCCTGTTCTGCTGTGGTGGGAGATGGGCTGGAAGGGACTTCGG  
AGGCTCTCCCGTGTCTGTACCACCCAGCTTCCCCTTGGATCCCTCCACCCCGCAGCC  
AGGAGAGGGAAGTAACTGTTCTT

>1850

AGGCTCTCCCGTGTCTGTACCACCCAGCTTCCCCTTGGATCCCTCCACCCCGCAGCC  
AGGAGAGGGAAGTAACTGTTCTTTGAGCAGGACATTTCAATTTCAAAGTATTCTTGATG  
CCGCCCCCGCCCCACCGCCA

>1851

TCCCGTGTCTGTACCACCCAGCTTCCCCTTGGATCCCTCCACCCCGCAGCCAGGAG  
AGGGAAGTAACTGTTCTTTGAGCAGGACATTTCAATTTCAAAGTATTCTTGATGCCGCC  
CCCCCGCCCCACCGCCAAGAATT

>1852

TGGATCCCTCCACCCCGCAGCCAGGAGAGGGAAGTAACTGTTCTTTGAGCAGGACAT  
TTCATTTCAAAGTATTCTTGATGCCGCCCGCCCCACCGCCAAGAATTCTGCTCT  
GTGGGTGATACTTATAAGGTAAC

>1853

GAGCAGGACATTTCAATTTCAAAGTATTCTTGATGCCGCCCGCCCCACCGCCAAG  
AATTCTGCTCTGTGGGTGATACTTATAAGGTAAGTATATGGCTTCCTTATTTAGGCAGCA  
GTTTCTTCTATGATTTAG

>1854

AGGACATTTCAATTTCAAAGTATTCTTGATGCCGCCCGCCCCACCGCCAAGAATT  
CTGCTCTGTGGGTGATACTTATAAGGTAAGTATATGGCTTCCTTATTTAGGCAGCAGTTT  
CTCTTCTATGATTTAGTTCC

>1855

CACCGCCAAGAATTCTGCTCTGTGGGTGATACTTATAAGGTAAGTATATGGCTTCCTTAT  
TTAGGCAGCAGTTTCTTCTATGATTTAGTTCTCTCATGATTCTTATAACCCTCTCTC  
AGATACTTCCAGGATGATA

>1856

TGTGGGTGATACTTATAAGGTAAGTATATGGCTTCCTTATTTAGGCAGCAGTTTCTTCT  
ATGATTTAGTTCTCTCATGATTCTTATAACCCTCTCTCAGATACTTCCAGGATGATAAA  
TCTTCTATCACTGTTTCA

>1857

ATTTTAGTTCTCTCATGATTCTTATAACCCTCTCTCAGATACTTCCAGGATGATAAATCT  
TCTATCACTGTTTCTATCTGATCACATCAGGGTGATTATATTTCTGACATAACCAGGTGG  
CTTTAATCCGTTGGTGGAA

>1858

CTTATAACCCTCTCTCAGATACTTCCAGGATGATAAATCTTCTATCACTGTTTCTATCTGAT  
CACATCAGGGTGATTATATTTCTGACATAACCAGGTGGCTTTAATCCGTTGGTGGAAAG  
AACCAGGCTCTCACCTCCAT

>1859

CTCAGATACTTCCAGGATGATAAATCTTCTATCACTGTTTCTATCTGATCACATCAGGGTG  
ATTATATTTCTGACATAACCAGGTGGCTTTAATCCGTTGGTGGAAAGAACAGGCTCTC  
ACCTCCATTGTTAAGATGTT

>1860

AGGATGATAAATCTTCTATCACTGTTTCTATCTGATCACATCAGGGTGATTATATTTCTGTA

CATAACCAGGTGGCTTTAATCCGTTGGTGGAAGAACCAGGCTCTCACCTCCATTGTTA  
AGATGTTATGTTTCTACTAA

>1861

TGATTATATTTTCGTGACATAACCAGGTGGCTTTAATCCGTTGGTGGAAGAACCAGGCTC  
TCACCTCCATTGTTAAGATGTTATGTTTCTACTAATCTGTCCACTGAGTGTCTCCATCCT  
ATTGTTTCCATTGCATGCTC

>1862

TTCGTGACATAACCAGGTGGCTTTAATCCGTTGGTGGAAGAACCAGGCTCTCACCTCC  
ATTGTTTAAGATGTTATGTTTCTACTAATCTGTCCACTGAGTGTCTCCATCCTATTGTTTC  
CATTGCATGCTCTCAGGTTAT

>1863

CGTTGGTGGAAGAACCAGGCTCTCACCTCCATTGTTAAGATGTTATGTTTCTACTAATC  
TGCCACTGAGTGTCTCCATCCTATTGTTTCCATTGCATGCTCTCAGGTTATTCCTTTGT  
TCTTGGCTGTCTGATTGCT

>1864

AGGCTCTCACCTCCATTGTTAAGATGTTATGTTTCTACTAATCTGTCCACTGAGTGTCT  
CCATCCTATTGTTTCCATTGCATGCTCTCAGGTTATTCCTTTGTTCTTGGCTGTCTGATT  
GCTCCAGAGGCTGCAGTT

>1865

AAGATGTTATGTTTCTACTAATCTGTCCACTGAGTGTCTCCATCCTATTGTTTCCATTGCA  
TGCTCTCAGGTTATTCCTTTGTTCTTGGCTGTCTGATTGCTCCAGAGGCTGCAGTTAT  
TTTATTTATTTATTTTCAT

>1866

CTGTCCACTGAGTGTCTCCATCCTATTGTTTCCATTGCATGCTCTCAGGTTATTCCTTTG  
TTCTTGGCTGTCTGATTGCTCCAGAGGCTGCAGTTATTTATTTATTTATTTTCATTTT  
TGGTGGGAGTAGGGGATT

>1867

ATTGTTTCCATTGCATGCTCTCAGGTTATTCCTTTGTTCTTGGCTGTCTGATTGCTCCA  
GAGGCTGCAGTTATTTATTTATTTATTTTCATTTTGGTGGGAGTAGGGGATTGATCTC  
TCTCTTGCCTTAGCTTG

>1868

TCCTTTGTTCTTGGCTGTCTGATTGCTCCAGAGGCTGCAGTTATTTATTTATTTATTT  
CATTTTTGGTGGGAGTAGGGGATTGATCTCTCTTGCCTTAGCTTGAATGGGTGGT  
CATTTCCAGGCTTACACATT

>1869

TTTATTTATTTATTTTCATTTTTTGGTGGGAGTAGGGGATTGATCTCTCTTGCCTTTAG  
CTTGAATGGGTGGTCATTTCCAGGCTTACACATTGCTCCATGCCACTGTAGGGGTCTG  
GCTTAGAGATGGTCGGGGGA

>1870

ATTTTATTTATTTTCATTTTTTGGTGGGAGTAGGGGATTGATCTCTCTTGCCTTAGCTT  
GAATGGGTGGTCATTTCCAGGCTTACACATTGCTCCATGCCACTGTAGGGGTCTGGCT  
TAGAGATGGTCGGGGGAGAG

>1871

TTGATCTCTCTTGCCTTAGCTTGAATGGGTGGTCATTTCCAGGCTTACACATTGCTC  
CATGCCACTGTAGGGGTCTGGCTTAGAGATGGTCGGGGGAGAGAAGGTGGTGATTTA  
AAAGATTTGGAGGCGGTGGCTT

>1872

TCTCTTGCCTTTAGCTTGAATGGGTGGTCATTTCCAGGCTTACACATTGCTCCATGCC  
CACTGTAGGGGTCTGGCTTAGAGATGGTCGGGGGAGAGAAGGTGGTGATTTAAAAGAT  
TTGGAGGCGGTGGCTTACATTG

>1873

CTTGAATGGGTGGTCATTTCCAGGCTTACACATTGCTCCATGCCACTGTAGGGGTCTG  
GCTTAGAGATGGTCGGGGGAGAGAAGGTGGTGATTTAAAAGATTTGGAGGCGGTGGC  
TTACATTGATTTAGCTTATCTAA

>1874

GCCCACTGTAGGGGTCTGGCTTAGAGATGGTCGGGGGAGAGAAGGTGGTGATTTAAA  
AGATTTGGAGGCGGTGGCTTACATTGATTTAGCTTATCTAACCCCTTAGCTAGAGGCTG  
CTCTTCCCTCAGAGTGTCCAAC

>1875

TTTGGAGGCGGTGGCTTACATTGATTTAGCTTATCTAACCCCTTAGCTAGAGGCTGCTC  
TTCCTCAGAGTGTCCAACCTAGCTGTAACCTAAAGCAACAGAGAAATGTATATCATCCC  
TTTTCTTGCATTAATTAGGGC

>1876

TGGAGGCGGTGGCTTACATTGATTTAGCTTATCTAACCCCTTAGCTAGAGGCTGCTCTT  
CCCTCAGAGTGTCCAACCTAGCTGTAACCTAAAGCAACAGAGAAATGTATATCATCCCT  
TTCTTGCATTAATTAGGGCTG

>1877

AACCCCTTAGCTAGAGGCTGCTCTTCCCTCAGAGTGTCCAACCTAGCTGTAACCTAAAGC  
AACAGAGAAATGTATATCATCCCTTTTCTTGCATTAATTAGGGCTGAGAAATCATTATTT  
AGAGGGATAAGAGCTCCGGA

>1878

TCCCTTTTCTTGCATTAATTAGGGCTGAGAAATCATTATTTAGAGGGATAAGAGCTCCG  
GAGGAGGAGGGTTTTTGAACCTAATGTAGAGATCTGTGGCCAGCTGTGTGATTCTCAG  
GTAGCAGGTGAGGGGGTGGGGG

>1879

TAATTAGGGCTGAGAAATCATTATTTAGAGGGATAAGAGCTCCGGAGGAGGAGGGTT  
TTTTGAACCTAATGTAGAGATCTGTGGCCAGCTGTGTGATTCTCAGGTAGCAGGTGAGG  
GGGTGGGGGTTGATGAGAGGGGTG

>1880

ATTATTTAGAGGGATAAGAGCTCCGGAGGAGGAGGGTTTTTGAACCTAATGTAGAGATC  
TGTGGCCAGCTGTGTGATTCTCAGGTAGCAGGTGAGGGGGTGGGGGTTGATGAGAGG  
GGTGAGAAGGAGCAGGTGCCAGGG

>1881

CTCCGGAGGAGGAGGGTTTTTGAACCTAATGTAGAGATCTGTGGCCAGCTGTGTGATT  
CTCAGGTAGCAGGTGAGGGGGTGGGGGTTGATGAGAGGGGTGAGAAGGAGCAGGTG  
CCAGGGTCAGGCAGGGGAGGGAGCCC

>1882

GAGGAGGGTTTTTGAACCTAATGTAGAGATCTGTGGCCAGCTGTGTGATTCTCAGGTAG  
CAGGTGAGGGGGTGGGGGTTGATGAGAGGGGTGAGAAGGAGCAGGTGCCAGGGTCA  
GGCAGGGGAGGGAGCCCCACTCCG

>1883

AATGTAGAGATCTGTGGCCAGCTGTGTGATTCTCAGGTAGCAGGTGAGGGGGTGGGGG



TTGATGAGAGGGGTGAGAAGGAGCAGGTGCCAGGGTCAGGCAGGGGAGGGAGCCCC  
CACTCCGTGCATCATCCCAGAGCCCT

>1884

GGTGGGGGTTGATGAGAGGGGTGAGAAGGAGCAGGTGCCAGGGTCAGGCAGGGGAG  
GGAGCCCCCACTCCGTGCATCATCCCAGAGCCCTGTTCTCCAAGCCCAGATTAGACA  
CCCTTCTCCACGTGGGGCCTCAAGTT

>1885

GTGAGAAGGAGCAGGTGCCAGGGTCAGGCAGGGGAGGGAGCCCCCACTCCGTGCAT  
CATCCCAGAGCCCTGTTCTCCAAGCCCAGATTAGACACCCTTCTCCACGTGGGGCCT  
CAAGTTAGAAATCCTGGGAGGAGGCC

>1886

GGGAGCCCCCACTCCGTGCATCATCCCAGAGCCCTGTTCTCCAAGCCCAGATTAGAC  
ACCCTTCTCCACGTGGGGCCTCAAGTTAGAAATCCTGGGAGGAGGCCTTATTGCTCAG  
GATCATCTGGGAATGTTGCTTCT

>1887

TCCGTGCATCATCCCAGAGCCCTGTTCTCCAAGCCCAGATTAGACACCCTTCTCCACG  
TGGGGCCTCAAGTTAGAAATCCTGGGAGGAGGCCTTATTGCTCAGGATCATCTGGGAA  
TGTTGCTTTCTGGGTTTAAAATA

>1888

CCTTCTCCACGTGGGGCCTCAAGTTAGAAATCCTGGGAGGAGGCCTTATTGCTCAGGA  
TCATCTGGGAATGTTGCTTTCTGGGTTTAAAATACAGTCAATGTTTAGATGAGCTGCTGT  
TCAGGCACATGGTCTGGTTAGC

>1889

GGGGCCTCAAGTTAGAAATCCTGGGAGGAGGCCTTATTGCTCAGGATCATCTGGGAAT  
GTTGCTTTCTGGGTTTAAAATACAGTCAATGTTTAGATGAGCTGCTGTTTCAGGCACATG  
GTCTGGTTAGCAAAGGGTTAAAT

>1890

TATTGCTCAGGATCATCTGGGAATGTTGCTTTCTGGGTTTAAAATACAGTCAATGTTTAG  
ATGAGCTGCTGTTTCAGGCACATGGTCTGGTTAGCAAAGGGTTAAATCCTGCATCCCGTT  
TTTAGTCATCAAGCTAGCTCA

>1891

CATCTGGGAATGTTGCTTTCTGGGTTTAAAATACAGTCAATGTTTAGATGAGCTGCTGTT  
CAGGCACATGGTCTGGTTAGCAAAGGGTTAAATCCTGCATCCCGTTTTTAGTCATCAAG  
CTAGCTCAGATCTGCCACCT

>1892

TTTCTGGGTTTAAAATACAGTCAATGTTTAGATGAGCTGCTGTTTCAGGCACATGGTCTG  
GTTAGCAAAGGGTTAAATCCTGCATCCCGTTTTTAGTCATCAAGCTAGCTCAGATCTGC  
CCACCTTGGAGCCCTGTGCTTT

>1893

TGTTTAGATGAGCTGCTGTTTCAGGCACATGGTCTGGTTAGCAAAGGGTTAAATCCTGCA  
TCCCGTTTTTAGTCATCAAGCTAGCTCAGATCTGCCACCTTGGAGCCCTGTGCTTTCC  
TGCCTTAGTGGGCAGAGTCTAG

>1894

GCAAAGGGTTAAATCCTGCATCCCGTTTTTAGTCATCAAGCTAGCTCAGATCTGCCAC  
CTTGGAGCCCTGTGCTTTCTGCCTTAGTGGGCAGAGTCTAGGGGACCTGTGGCATGT  
TCAATGATTGAGGACTCTTGTC

>1895

TGCATCCCGTTTTAGTCATCAAGCTAGCTCAGATCTGCCACCTTGGAGCCCTGTGCT  
TTCCTGCCTTAGTGGGCAGAGTCTAGGGGACCTGTGGCATGTTCAATGATTGAGGACT  
CTTGTCAGATTCCAAAAACCTA

>1896

TTTTTAGTCATCAAGCTAGCTCAGATCTGCCACCTTGGAGCCCTGTGCTTTCCTGCCTT  
AGTGGGCAGAGTCTAGGGGACCTGTGGCATGTTCAATGATTGAGGACTCTTGTCAGA  
TTCCAAAAACCTACTGTGATGA

>1897

AGCTAGCTCAGATCTGCCACCTTGGAGCCCTGTGCTTTCCTGCCTTAGTGGGCAGAG  
TCTAGGGGACCTGTGGCATGTTCAATGATTGAGGACTCTTGTCAGATTCCAAAAACCT  
ACTGTGATGATGCTGTTCTGAAG

>1898

TCAGATCTGCCACCTTGGAGCCCTGTGCTTTCCTGCCTTAGTGGGCAGAGTCTAGGG  
GACCTGTGGCATGTTCAATGATTGAGGACTCTTGTCAGATTCCAAAAACCTACTGTGA  
TGATGCTGTTCTGAAGCTGTGGT

>1899

CCCTGTGCTTTCCTGCCTTAGTGGGCAGAGTCTAGGGGACCTGTGGCATGTTCAATGAT  
TGAGGACTCTTGTCAGATTCCAAAAACCTACTGTGATGATGCTGTTCTGAAGCTGTGG  
TAGGCCGGTGATTGAGTGGAGTG

>1900

GGGCAGAGTCTAGGGGACCTGTGGCATGTTCAATGATTGAGGACTCTTGTCAGATTCC  
AAAAACCTACTGTGATGATGCTGTTCTGAAGCTGTGGTAGGCCGGTGATTGAGTGGAG  
TGTGTAGTGACCCTCAGGAATTCT

>1901

AGGGGACCTGTGGCATGTTCAATGATTGAGGACTCTTGTCAGATTCCAAAAACCTAC  
TGTGATGATGCTGTTCTGAAGCTGTGGTAGGCCGGTGATTGAGTGGAGTGTGTAGTGAC  
CCTCAGGAATTCTTCAGAAGTTAG

>1902

GGCATGTTCAATGATTGAGGACTCTTGTCAGATTCCAAAAACCTACTGTGATGATGCT  
GTTCTGAAGCTGTGGTAGGCCGGTGATTGAGTGGAGTGTGTAGTGACCCTCAGGAATTC  
TTCAGAAGTTAGGATTTTGACGA

>1903

CTTGTCAGATTCCAAAAACCTACTGTGATGATGCTGTTCTGAAGCTGTGGTAGGCCGGT  
GATTGAGTGGAGTGTGTAGTGACCCTCAGGAATTCTTCAGAAGTTAGGATTTTGACGAT  
ACCTCTGATAAGTTGGGTTTTT

>1904

ATGCTGTTCTGAAGCTGTGGTAGGCCGGTGATTGAGTGGAGTGTGTAGTGACCCTCAGG  
AATTCTTCAGAAGTTAGGATTTTGACGATACCTCTGATAAGTTGGGTTTTTAATTTGCTG  
GTTTATCTTAGAGTGGAGGCTG

>1905

GATTGAGTGGAGTGTGTAGTGACCCTCAGGAATTCTTCAGAAGTTAGGATTTTGACGAT  
ACCTCTGATAAGTTGGGTTTTTAATTTGCTGGTTTATCTTAGAGTGGAGGCTGTGGCCC  
ACAGCAAGTAGTACATTTTCCA

>1906

GACCCTCAGGAATTCTTCAGAAGTTAGGATTTTGACGATACCTCTGATAAGTTGGGTTT

TTAATTTGCTGGTTTATCTTAGAGTGGAGGCTGTGGCCACAGCAAGTAGTACATTTTC  
CATCTCAGCCCAGTGCATGGAC

>1907

TTCTTCAGAAGTTAGGATTTTGACGATACCTCTGATAAGTTGGGTTTTTAATTTGCTGGT  
TTATCTTAGAGTGGAGGCTGTGGCCACAGCAAGTAGTACATTTCCATCTCAGCCCAG  
TGCATGGACAAACGTACCTCA

>1908

CGATACCTCTGATAAGTTGGGTTTTTAATTTGCTGGTTTATCTTAGAGTGGAGGCTGTGG  
CCCACAGCAAGTAGTACATTTCCATCTCAGCCCAGTGCATGGACAAACGTACCTCAA  
ACCAAAGGTTCAATGAAGCTCT

>1909

TAATTTGCTGGTTTATCTTAGAGTGGAGGCTGTGGCCACAGCAAGTAGTACATTTTCC  
ATCTCAGCCCAGTGCATGGACAAACGTACCTCAAACCAAAGGTTCAATGAAGCTCTAT  
TTATCTTTACTATATGCTCTGGT

>1910

ATCTTAGAGTGGAGGCTGTGGCCACAGCAAGTAGTACATTTCCATCTCAGCCCAGTG  
CATGGACAAACGTACCTCAAACCAAAGGTTCAATGAAGCTCTATTTATCTTTACTATATG  
CTCTGGTATCTTCTTCCAT

>1911

TGTGGCCACAGCAAGTAGTACATTTCCATCTCAGCCCAGTGCATGGACAAACGTAC  
CTCAAACCAAAGGTTCAATGAAGCTCTATTTATCTTTACTATATGCTCTGGTATCTTCTCT  
TCCATTCTATCTTATTTCAAT

>1912

CAGTGCATGGACAAACGTACCTCAAACCAAAGGTTCAATGAAGCTCTATTTATCTTTAC  
TATATGCTCTGGTATCTTCTTCCATTCTATCTTATTTCAATTAAGAACGTTAATGAAGA  
CCCCTAATGGATTGCCACC

>1913

GAAGCTCTATTTATCTTTACTATATGCTCTGGTATCTTCTTCCATTCTATCTTATTTCAAT  
TAAGAACGTTAATGAAGACCCCTAATGGATTGCCACCCATGGTTGAGGAGGTCCCC  
CAAACAGTGAGGCCTTAGC

>1914

CTTCTCTCCATTCTATCTTATTTCAATTAAGAACGTTAATGAAGACCCCTAATGGATTG  
CCACCCATGGTTGAGGAGGTCCCCCAAACAGTGAGGCCTTAGCCATAGGTATTCAATT  
CAAAAAGCATTACTGAGCA

>1915

ATTCTATCTTATTTCAATTAAGAACGTTAATGAAGACCCCTAATGGATTGCCACCCATG  
GTTGAGGAGGTCCCCCAAACAGTGAGGCCTTAGCCATAGGTATTCAATTCAAAAAGC  
ATTTACTGAGCATCACTGTGTA

>1916

TGAAGACCCCTAATGGATTGCCACCCATGGTTGAGGAGGTCCCCCAAACAGTGAGG  
CCTTAGCCATAGGTATTCAATTCAAAAAGCATTACTGAGCATCACTGTGTACTAGGTG  
GTTGCTAAATGCTATGGGGGTAA

>1917

AGGAGGTCCCCCAAACAGTGAGGCCTTAGCCATAGGTATTCAATTCAAAAAGCATTTA  
CTGAGCATCACTGTGTACTAGGTGGTTGCTAAATGCTATGGGGGTAATGCAGAGAAATT  
AATAAATCCCTGTAAGAGTTCAC

>1918

AAACAGTGAGGCCTTAGCCATAGGTATTCAATTCAAAAAGCATTACTGAGCATCACTG  
TGACTAGGTGGTTGCTAAATGCTATGGGGGTAATGCAGAGAAATTAATAAATCCCTGT  
AAGAGTTCACTGTAAAACAGAA

>1919

ATAGGTATTCAATTCAAAAAGCATTACTGAGCATCACTGTGTACTAGGTGGTTGCTAA  
ATGCTATGGGGGTAATGCAGAGAAATTAATAAATCCCTGTAAGAGTTCACTGTAAAACA  
GAAATGACAGCCATATGTGTAT

>1920

CTGAGCATCACTGTGTACTAGGTGGTTGCTAAATGCTATGGGGGTAATGCAGAGAAATT  
AATAAATCCCTGTAAGAGTTCACTGTAAAACAGAAATGACAGCCATATGTGTATGACTT  
TGTGTGTGTGTATATATATA

>1921

ATGGGGGTAATGCAGAGAAATTAATAAATCCCTGTAAGAGTTCACTGTAAAACAGAAA  
TGACAGCCATATGTGTATGACTTTGTGTGTGTGTATATATATATATCAGACTGTATGATT  
AAATATTATATAAGTGAGGT

>1922

GGGGGTAATGCAGAGAAATTAATAAATCCCTGTAAGAGTTCACTGTAAAACAGAAATG  
ACAGCCATATGTGTATGACTTTGTGTGTGTGTATATATATATATCAGACTGTATGATTA  
AATATTATATAAGTGAGGTAT

>1923

CACTGTAAAACAGAAATGACAGCCATATGTGTATGACTTTGTGTGTGTGTATATATAT  
ATATCAGACTGTATGATTAATATTATATAAGTGAGGTATGGGGGAGCAGAGGAGAGGA  
ATTGAATTTGAATTTTGATT

>1924

GCCATATGTGTATGACTTTGTGTGTGTGTATATATATATATCAGACTGTATGATTAATA  
TTATATAAGTGAGGTATGGGGGAGCAGAGGAGAGGAATTGAATTTGAATTTTGATTGA  
AGATTCAGGAGGGCTTCAT

>1925

ATGTGTATGACTTTGTGTGTGTGTATATATATATATCAGACTGTATGATTAATATTATA  
TAAGTGAGGTATGGGGGAGCAGAGGAGAGGAATTGAATTTGAATTTTGATTGAAGAT  
TCAGGAGGGCTTCATGGAGG

>1926

ATGGGGGAGCAGAGGAGAGGAATTGAATTTGAATTTGATTGAAGATTCAGGAGGGC  
TTCATGGAGGAGGTAGCATTGGCCAGGTTTTAGAGAATGGCTAGGCTTTGGACAAGT  
GGAGACAGGAACTGCCATTTGGAG

>1927

AGAGGAATTGAATTTGAATTTGATTGAAGATTCAGGAGGGCTTCATGGAGGAGGTA  
GCATTTGGCCAGGTTTTAGAGAATGGCTAGGCTTTGGACAAGTGGAGACAGGAACTGC  
CATTGGAGGTAGGAGATGAGCTA

>1928

AGATTCAGGAGGGCTTCATGGAGGAGGTAGCATTGGCCAGGTTTTAGAGAATGGCTA  
GGCTTTGGACAAGTGGAGACAGGAACTGCCATTTGGAGGTAGGAGATGAGCTAATGT  
GTGGCAGTGTATGGGTGGGGGCAGG

>1929

GTAGCATTGGCCAGGTTTTAGAGAATGGCTAGGCTTTGGACAAGTGGAGACAGGAAC

TGCCATTTGGAGGTAGGAGATGAGCTAATGTGTGGCAGTGTATGGGTGGGGGCAGGTG  
CCTGTATACAAGGTAGTGTGCTGG

>1930

TTTAGAGAATGGCTAGGCTTTGGACAAGTGGAGACAGGAACTGCCATTTGGAGGTAGG  
AGATGAGCTAATGTGTGGCAGTGTATGGGTGGGGGCAGGTGCCTGTATACAAGGTAGT  
GTGCTGGAATGGGGCGATGGGCAT

>1931

TAGAGAATGGCTAGGCTTTGGACAAGTGGAGACAGGAACTGCCATTTGGAGGTAGGA  
GATGAGCTAATGTGTGGCAGTGTATGGGTGGGGGCAGGTGCCTGTATACAAGGTAGTG  
TGCTGGAATGGGGCGATGGGCATGG

>1932

GCTTTGGACAAGTGGAGACAGGAACTGCCATTTGGAGGTAGGAGATGAGCTAATGTGT  
GGCAGTGTATGGGTGGGGGCAGGTGCCTGTATACAAGGTAGTGTGCTGGAATGGGGCG  
ATGGGCATGGGGTAGGATGGGAGA

>1933

TGCCATTTGGAGGTAGGAGATGAGCTAATGTGTGGCAGTGTATGGGTGGGGGCAGGTG  
CCTGTATACAAGGTAGTGTGCTGGAATGGGGCGATGGGCATGGGGTAGGATGGGAGAT  
CAAGCAGGGAAAGTGGATTGGGGC

>1934

TGGCAGTGTATGGGTGGGGGCAGGTGCCTGTATACAAGGTAGTGTGCTGGAATGGGGC  
GATGGGCATGGGGTAGGATGGGAGATCAAGCAGGGAAAGTGGATTGGGGCCAGGTCC  
TAGAATGATTTGAATACCAAGCTAG

>1935

CCTGTATACAAGGTAGTGTGCTGGAATGGGGCGATGGGCATGGGGTAGGATGGGAGAT  
CAAGCAGGGAAAGTGGATTGGGGCCAGGTCCTAGAATGATTTGAATACCAAGCTAGCT  
TTCTGGACATTTGTAAGGCGCACT

>1936

GTGTGCTGGAATGGGGCGATGGGCATGGGGTAGGATGGGAGATCAAGCAGGGAAAGT  
GGATTGGGGCCAGGTCCTAGAATGATTTGAATACCAAGCTAGCTTTCTGGACATTTGTA  
AGGCGCACTTGATAGGGGTTGGAT

>1937

CAAGCAGGGAAAGTGGATTGGGGCCAGGTCCTAGAATGATTTGAATACCAAGCTAGCT  
TTCTGGACATTTGTAAGGCGCACTTGATAGGGGTTGGATCATTGCGATATTATTGGAAG  
ACAAACTGGGGAGGGTGTGAGA

>1938

GGGCCAGGTCCTAGAATGATTTGAATACCAAGCTAGCTTTCTGGACATTTGTAAGGCGC  
ACTTGATAGGGGTTGGATCATTGCGATATTATTGGAAGACAAACTGGGGAGGGTGTG  
AGACCATGTGGCTGCTCAGAATG

>1939

GGACATTTGTAAGGCGCACTTGATAGGGGTTGGATCATTGCGATATTATTGGAAGACAA  
AACTGGGGAGGGTGTGAGACCATGTGGCTGCTCAGAATGCAGAGCCCCTCTGATGTCC  
TCAGCCTTCTACGTATTTAGTGA

>1940

GGCGCACTTGATAGGGGTTGGATCATTGCGATATTATTGGAAGACAAACTGGGGAGG  
GTGTGAGACCATGTGGCTGCTCAGAATGCAGAGCCCCTCTGATGTCCTCAGCCTTCTAC  
GTATTTAGTGATGGGGGTGGTGG

>1941

TATTATTGGAAGACAAAACACTGGGGAGGGTGTGAGACCATGTGGCTGCTCAGAATGCAG  
AGCCCCTCTGATGTCCTCAGCCTTCTACGTATTTAGTGATGGGGGTGGTGGTGGTAAAG  
AGCCTTGACAGACAGCCTGGCTTG

>1942

AACTGGGGAGGGTGTGAGACCATGTGGCTGCTCAGAATGCAGAGCCCCTCTGATGTCC  
TCAGCCTTCTACGTATTTAGTGATGGGGGTGGTGGTGGTAAAGAGCCTTGACAGACAGC  
CTGGCTTGGGTGCTTGCTTGAAGT

>1943

AGACCATGTGGCTGCTCAGAATGCAGAGCCCCTCTGATGTCCTCAGCCTTCTACGTATT  
TAGTGATGGGGGTGGTGGTGGTAAAGAGCCTTGACAGACAGCCTGGCTTGGGTGCTTGC  
TTGAAGTTCTTACGCCCACTAAC

>1944

CCATGTGGCTGCTCAGAATGCAGAGCCCCTCTGATGTCCTCAGCCTTCTACGTATTTAG  
TGATGGGGGTGGTGGTGGTAAAGAGCCTTGACAGACAGCCTGGCTTGGGTGCTTGCTTG  
AAGTTCTTACGCCCACTAACTCC

>1945

TGTGGCTGCTCAGAATGCAGAGCCCCTCTGATGTCCTCAGCCTTCTACGTATTTAGTGA  
TGGGGGTGGTGGTGGTAAAGAGCCTTGACAGACAGCCTGGCTTGGGTGCTTGCTTGAA  
GTTCTTACGCCCACTAACTCCTGC

>1946

TCCTCAGCCTTCTACGTATTTAGTGATGGGGGTGGTGGTGGTAAAGAGCCTTGACAGAC  
AGCCTGGCTTGGGTGCTTGCTTGAAGTTCTTACGCCCACTAACTCCTGCCCTGCTCTGT  
GGAGCCTGCTGAATGGGGCATTAA

>1947

GAGCCTTGACAGACAGCCTGGCTTGGGTGCTTGCTTGAAGTTCTTACGCCCACTAACTC  
CTGCCCTGCTCTGTGGAGCCTGCTGAATGGGGCATTAGGCTAGTCACACACCTGTCCTT  
TTTACATTCATGCTGTACCCTT

>1948

TGCTTGAAGTTCTTACGCCCACTAACTCCTGCCCTGCTCTGTGGAGCCTGCTGAATGGG  
GCATTAGGCTAGTCACACACCTGTCCTTTTTTACATTCATGCTGTACCCTTTGCAAACAT  
TACGACAGTGCAAACTCAG

>1949

CTTACGCCCACTAACTCCTGCCCTGCTCTGTGGAGCCTGCTGAATGGGGCATTAGGCTA  
GTCACACACCTGTCCTTTTTTACATTCATGCTGTACCCTTTGCAAACATTACGACAGCAG  
TGCAAACCTAGCCCTGGGCCTC

>1950

CCTGCTCTGTGGAGCCTGCTGAATGGGGCATTAGGCTAGTCACACACCTGTCCTTTTTT  
ACATTCATGCTGTACCCTTTGCAAACATTACGACAGTGCAAACTCAGCCCTGGGCCT  
CAGAGGAGCCAGGCGTGGCCAG

>1951

GGCATTAGGCTAGTCACACACCTGTCCTTTTTTACATTCATGCTGTACCCTTTGCAAACA  
TTACGACAGTGCAAACTCAGCCCTGGGCCTCAGAGGAGCCAGGCGTGGCCAGGAG  
AGTGGGATTTGGAACGGAAGTGC

>1952

TTCATGCTGTACCCTTTGCAAACATTACGACAGTGCAAACTCAGCCCTGGGCCTCA

GAGGAGCCAGGCGTGGCCAGGAGAGTGGGATTTGGAACGGAAGTGCTTTTGTTTTGG  
GCATTCACTACTCCCCACCCCCAC

>1953

CCTTTGCAAACATTACGCAGCAGTGCAAACCTCAGCCCTGGGCCTCAGAGGAGCCAGG  
CGTGGCCAGGAGAGTGGGATTTGGAACGGAAGTGCTTTTGTTTTGGCATTCACTACT  
CCCCACCCCCACTGGCACTTGGAT

>1954

AAACTCAGCCCTGGGCCTCAGAGGAGCCAGGCGTGGCCAGGAGAGTGGGATTTGGAA  
CGGAAGTGCTTTTGTTTTGGCATTCACTACTCCCCACCCCCACTGGCACTTGGATTG  
TCCTTCTTTTCTCCTTGGTGTCT

>1955

TGGGATTTGGAACGGAAGTGCTTTTGTTTTGGCATTCACTACTCCCCACCCCCACTG  
GCACTTGGATTGTCCTTCTTTTCTCCTTGGTGTCTCTCATCCTGTCCAGCCTTCAAGAC  
CTCCTCAAGTCAGGCTTCTCT

>1956

GCTTTTGTTTTGGCATTCACTACTCCCCACCCCCACTGGCACTTGGATTGTCCTTCTT  
TTTCTCCTGGTGTCTCTCATCCTGTCCAGCCTTCAAGACCTCCTCAAGTCAGGCTTCT  
CTGGGAAGCGCTGTCTGTCTG

>1957

TTTTGTTTTTGGCATTCACTACTCCCCACCCCCACTGGCACTTGGATTGTCCTTCTTT  
TCTCCTGGTGTCTCTCATCCTGTCCAGCCTTCAAGACCTCCTCAAGTCAGGCTTCTCT  
GGGAAGCGCTGTCTGTCTG

>1958

TGGCACTTGGATTGTCCTTCTTTTCTCCTTGGTGTCTCTCATCCTGTCCAGCCTTCAAG  
ACCTCCTCAAGTCAGGCTTCTCTGGGAAGCGCTGTCTGTCTGTCTTGGTGTCTGCTGG  
CTTCTCTTCTGTCTCCTGTGC

>1959

TTCTCCTTGGTGTCTCTCATCCTGTCCAGCCTTCAAGACCTCCTCAAGTCAGGCTTCTC  
TGGGAAGCGCTGTCTGTCTGTCTTGGTGTCTGCTGGCTTCTCTGTCTCCTGTGCC  
ATCTCCAGTTTGCACCATTTGA

>1960

CCTTGGTGTCTCTCATCCTGTCCAGCCTTCAAGACCTCCTCAAGTCAGGCTTCTCTGGG  
AAGCGCTGTCTGTCTGTCTTGGTGTCTGCTGGCTTCTCTGTCTCCTGTGCCATCTC  
CAGTTTGCACCATTTGAGTAT

>1961

GACCTCCTCAAGTCAGGCTTCTCTGGGAAGCGCTGTCTGTCTGTCTTGGTGTCTGCTG  
GCTTCTCTTCTGTCTCCTGTGCCATCTCCAGTTTGCACCATTTGAGTATAAGCTCTGCT  
GCCTCATTTGAGTTTAAAGTTTT

>1962

TCTCTGGGAAGCGCTGTCTGTCTGTCTTGGTGTCTGCTGGCTTCTCTTCTGTCTCCTG  
TGCCATCTCCAGTTTGCACCATTTGAGTATAAGCTCTGCTGCCTCATTGAGTTTAAAGTT  
TTATCCCCCAGCCACAACCT

>1963

GTCTGTCTGTCTTGGTGTCTGCTGGCTTCTCTTCTGTCTCCTGTGCCATCTCCAGTTT  
CACCATTTGAGTATAAGCTCTGCTGCCTCATTGAGTTTAAAGTTTTATCCCCCAGCCAC  
AACCTAAGTTCCATGAGGAT

>1964

CTTCTCTTCTGCTCCTGTGCCATCTCCAGTTTGACCATTGAGTATAAGCTCTGCTG  
CCTCATTGAGTTAAGTTTATCCCCCAGCCACAACCTAAGTTCCATGAGGATAGTG  
ATTGTGGTTTATCTTCTCTCC

>1965

TTGCACCATTGAGTATAAGCTCTGCTGCCTCATTGAGTTAAGTTTATCCCCCAGC  
CACAACTAAGTTCCATGAGGATAGTGATTGTGGTTTATCTTCTCTCCCTCAGCTGTCTG  
CTGACACCATGCTGAATACA

>1966

TATAAGCTCTGCTGCCTCATTGAGTTAAGTTTATCCCCCAGCCACAACCTAAGTTC  
CATGAGGATAGTGATTGTGGTTTATCTTCTCTCCCTCAGCTGTCTGCTGACACCATGCTG  
AATACATAGTAGGTACTIONAG

>1967

TTTTATCCCCCAGCCACAACCTAAGTTCCATGAGGATAGTGATTGTGGTTTATCTTCTC  
TCCCTCAGCTGTCTGCTGACACCATGCTGAATACATAGTAGGTACTIONAGTAAATAATAG  
CTAATTGAGCATTACTATGG

>1968

TCCATGAGGATAGTGATTGTGGTTTATCTTCTCTCCCTCAGCTGTCTGCTGACACCATGC  
TGAATACATAGTAGGTACTIONAGTAAATAATAGCTAATTGAGCATTACTATGGACAAAGC  
ACTTTACTTGCATTAACACA

>1969

AGTGATTGTGGTTTATCTTCTCTCCCTCAGCTGTCTGCTGACACCATGCTGAATACATAG  
TAGGTACTIONAGTAAATAATAGCTAATTGAGCATTACTATGGACAAAGCACTTTACTTGC  
ATTAACACATCCCATCCTCA

>1970

AGCTAATTGAGCATTACTATGGACAAAGCACTTTACTTGCATTAACACATCCCATCCTC  
ACAACCCTGTGAGGTGAATCCTATTAAGGAATACTTGGGTGCTTTCAGAGTTATT  
CTCTCCAGCTTTGGACTTCTT

>1971

ATTGAGCATTACTATGGACAAAGCACTTTACTTGCATTAACACATCCCATCCTCACAAC  
CACCTGTGAGGTGAATCCTATTAAGGAATACTTGGGTGCTTTCAGAGTTATTCTCTC  
CAGCTTTGGACTTCTTGTTTC

>1972

TTTACTTGCATTAACACATCCCATCCTCACAACCACCTGTGAGGTGAATCCTATTAAGGA  
GGAATACTTGGGTGCTTTCAGAGTTATTCTCTCCAGCTTTGGACTTCTTGTTTCATTTGC  
CCTGAGAGCTCCTCAACTCTG

>1973

TAACACATCCCATCCTCACAACCACCTGTGAGGTGAATCCTATTAAGGAATACTTGG  
GTGCTTTCAGAGTTATTCTCTCCAGCTTTGGACTTCTTGTTTCATTTGCCCTGAGAGCTC  
CTCAACTCTGTTGATGCTGTT

>1974

GTGAGGTGAATCCTATTAAGGAATACTTGGGTGCTTTCAGAGTTATTCTCTCCAGCT  
TTGGACTTCTTGTTTCATTTGCCCTGAGAGCTCCTCAACTCTGTTGATGCTGTTCTTTCA  
AAGGTTGCTTGTGACCTCTTA

>1975

GGTGCTTTCAGAGTTATTCTCTCCAGCTTTGGACTTCTTGTTTCATTTGCCCTGAGAGCT



CCTCAACTCTGTTGATGCTGTTCTTTCAAAGGTTGCTTGTGACCTCTTAGTTCTCAAGA  
GCACTGTATTAGGTTGGTGCA

>1976

TCCAGCTTTGGACTTCTTGTTCATTTGCCCTGAGAGCTCCTCAACTCTGTTGATGCTG  
TTCTTTCAAAGGTTGCTTGTGACCTCTTAGTTCTCAAGAGCACTGTATTAGGTTGGTGC  
AAAAGTAATTGCTATTTTAGAC

>1977

TTGGACTTCTTGTTCATTTGCCCTGAGAGCTCCTCAACTCTGTTGATGCTGTTCTTTCA  
AAGGTTGCTTGTGACCTCTTAGTTCTCAAGAGCACTGTATTAGGTTGGTGCAAAAGTAA  
TTGCTATTTTAGACATTACTT

>1978

GTTTCATTTGCCCTGAGAGCTCCTCAACTCTGTTGATGCTGTTCTTTCAAAGGTTGCTT  
GTGACCTCTTAGTTCTCAAGAGCACTGTATTAGGTTGGTGCAAAAGTAATTGCTATTTT  
AGACATTACTTTCAATGGCAAA

>1979

CTCAACTCTGTTGATGCTGTTCTTTCAAAGGTTGCTTGTGACCTCTTAGTTCTCAAGAG  
CACTGTATTAGGTTGGTGCAAAAGTAATTGCTATTTTAGACATTACTTTCAATGGCAAAA  
ACTGCAATTACTTTTGCGCCA

>1980

TTTTAGACATTACTTTCAATGGCAAAAAGTCAATTACTTTTGCGCCAACTAATACTTTTC  
CCAGACTCCAGTATTGGCTCCATTGACCCCTCCTGTTCTGCAACTTCTCCCCCTCCT  
CCTCTGGTATTTCTGGAAT

>1981

AAAAGTCAATTACTTTTGCGCCAACTAATACTTTCCAGACTCCAGTATTGGCTCCATT  
GACCCCTCCTGTTCTGCAACTTCTCCCCCTCCTCCTGTTTCTGGAATTTCTGGAATCCCT  
CCCTAGGGTCAGTGCCATGT

>1982

CTTTCCAGACTCCAGTATTGGCTCCATTGACCCCTCCTGTTCTGCAACTTCTCCCCC  
TCTCCTCTGGTATTTCTGGAATCCCTCCCTAGGGTCAGTGCCATGTGGTGCCTGGA  
ACTCCCTGGGATCTGTGTTG

>1983

ATTGACCCCTCCTGTTCTGCAACTTCTCCCCCTCCTCCTGTTTCTGGAATTTCTGGAATC  
CCTCCCTAGGGTCAGTGCCATGTGGTGCCTGGAATCCCTGGGATCTGTGTTTGAATCC  
TGACATTGCCACTTTCTAAGT

>1984

TTCTGCAACTTCTCCCCCTCCTCCTGTTTCTGGAATCCCTCCCTAGGGTCA  
GTGCCATGTGGTGCCTGGAATCCCTGGGATCTGTGTTTGAATCCTGACATTGCCACTT  
TCTAAGTGGCAAACACTTTGG

>1985

TCCTCTGGTATTTCTGGAATCCCTCCCTAGGGTCAGTGCCATGTGGTGCCTGGAAT  
CCCTGGGATCTGTGTTTGAATCCTGACATTGCCACTTTCTAAGTGGCAAACACTTTGGC  
CACCTCCCCCTCTCCTGAGTC

>1986

CTCTGGTATTTCTGGAATCCCTCCCTAGGGTCAGTGCCATGTGGTGCCTGGAATCC  
CTGGGATCTGTGTTTGAATCCTGACATTGCCACTTTCTAAGTGGCAAACACTTTGGCCA  
CCTCCCCCTCTCCTGAGTCTG

>1987

GGGTCAGTGCCATGTGGTGCCTGGAACCTCCCTGGGATCTGTGTTTGAATCCTGACATTG  
CCACTTTCTAAGTGGCAAACACTTTGGCCACCTCCCCCTCTCCTGAGTCTGTTTCATC  
ATCTGCAAAATGCTGGTAGTTT

>1988

TCTGTGTTTGAATCCTGACATTGCCACTTTCTAAGTGGCAAACACTTTGGCCACCTCCC  
CCTCTTCTGAGTCTGTTTCATCATCTGCAAAATGCTGGTAGTTTCTCTTCTCACAGGA  
AAGATGGTGGTTGTTTCATCGAT

>1989

TGTTTGAATCCTGACATTGCCACTTTCTAAGTGGCAAACACTTTGGCCACCTCCCCCTC  
TTCTGAGTCTGTTTCATCATCTGCAAAATGCTGGTAGTTTCTCTTCTCACAGGAAAGA  
TGGTGGTTGTTTCATCGATGTCT

>1990

TTTCTAAGTGGCAAACACTTTGGCCACCTCCCCCTCTCCTGAGTCTGTTTCATCATCT  
GCAAAATGCTGGTAGTTTCTCTTCTCACAGGAAAGATGGTGGTTGTTTCATCGATGTCTG  
TTGAAACCGTGACCCTCTCTGC

>1991

CTCCCCCTCTCCTGAGTCTGTTTCATCATCTGCAAAATGCTGGTAGTTTCTCTTCTCAC  
AGGAAAGATGGTGGTTGTTTCATCGATGTCTGTTGAAACCGTGACCCTCTCTGCTGAAT  
GTAGAAGAAGATGACCTTACCA

>1992

CCCCTCTTCTGAGTCTGTTTCATCATCTGCAAAATGCTGGTAGTTTCTCTTCTCACAGG  
AAAGATGGTGGTTGTTTCATCGATGTCTGTTGAAACCGTGACCCTCTCTGCTGAATGTAG  
AAGAAGATGACCTTACCAGTT

>1993

GTTTCATCATCTGCAAAATGCTGGTAGTTTCTCTTCTCACAGGAAAGATGGTGGTTGTT  
CATCGATGTCTGTTGAAACCGTGACCCTCTCTGCTGAATGTAGAAGAAGATGACCTTAC  
CAGTTCTCCTGTCTCTCCAGTG

>1994

TTCTCTTCTCACAGGAAAGATGGTGGTTGTTTCATCGATGTCTGTTGAAACCGTGACCCT  
CTCTGCTGAATGTAGAAGAAGATGACCTTACCAGTTCTCCTGTCTCTCCAGTGTCTTTC  
TTGACAATCTTGTGGTTTCCAC

>1995

GTGGTTGTTTCATCGATGTCTGTTGAAACCGTGACCCTCTCTGCTGAATGTAGAAGAAGA  
TGACCTTACCAGTTCTCCTGTCTCTCCAGTGTCTTCTTGACAATCTTGTGGTTTCCACA  
AGCAACCCTCTGTGGGTGATT

>1996

TCATCGATGTCTGTTGAAACCGTGACCCTCTCTGCTGAATGTAGAAGAAGATGACCTTA  
CCAGTTCTCCTGTCTCTCCAGTGTCTTCTTGACAATCTTGTGGTTTCCACAAGCAACC  
CTCTGTGGGTGATTTCCAGATC

>1997

CTCTGCTGAATGTAGAAGAAGATGACCTTACCAGTTCTCCTGTCTCTCCAGTGTCTTTC  
TTGACAATCTTGTGGTTTCCACAAGCAACCCTCTGTGGGTGATTTCCAGATCTCTACCT  
CTAGTTGTTTTTCGTTTTTTGT

>1998

TGCTGAATGTAGAAGAAGATGACCTTACCAGTTCTCCTGTCTCTCCAGTGTCTTCTTG

ACAATCTTGTGGTTTCCACAAGCAACCCTCTGTGGGTGATTCCAGATCTCTACCTCTA  
GTTGTTTTTCGTTTTTTGTCTT

>1999

GACCTTACCAGTTCTCCTGTCTCTCCAGTGTCTTTCTTGACAATCTTGTGGTTTCCACA  
AGCAACCCTCTGTGGGTGATTCCAGATCTCTACCTCTAGTTGTTTTTCGTTTTTTGTCT  
TTTCTTGTGTTTACACATTC

>2000

TGTCTTTCTTGACAATCTTGTGGTTTCCACAAGCAACCCTCTGTGGGTGATTCCAGAT  
CTCTACCTCTAGTTGTTTTTCGTTTTTTGTCTTTCTTGTGTTTACACATTCTTTTCCAG  
TAGCCTCACGGGCACACCAG

>2001

GACAATCTTGTGGTTTCCACAAGCAACCCTCTGTGGGTGATTCCAGATCTCTACCTCT  
AGTTGTTTTTCGTTTTTTGTCTTTCTTGTGTTTACACATTCTTTTCCAGTAGCCTCAC  
GGGCACACCAGTCTGCAAGG

>2002

TTGTGGTTTCCACAAGCAACCCTCTGTGGGTGATTCCAGATCTCTACCTCTAGTTGTT  
TTTTCGTTTTTTGTCTTTCTTGTGTTTACACATTCTTTTCCAGTAGCCTCACGGGCACA  
CCAGTCTGCAAGGATCTAGA

>2003

CACAAGCAACCCTCTGTGGGTGATTCCAGATCTCTACCTCTAGTTGTTTTTCGTTTTTT  
GTCTTTTCTTGTGTTTACACATTCTTTTCCAGTAGCCTCACGGGCACACCAGTCTCTGC  
AAGGATCTAGAATGTGATGGT

>2004

ATTTCCAGATCTCTACCTCTAGTTGTTTTTCGTTTTTTGTCTTTCTTGTGTTTACACAT  
TCTTTTCCAGTAGCCTCACGGGCACACCAGTCTGCAAGGATCTAGAATGTGATGGTTT  
GAGCTAGTTCAACACCTTCC

>2005

AGTTGTTTTTCGTTTTTTGTCTTTCTTGTGTTTACACATTCTTTTCCAGTAGCCTCAC  
GGGCACACCAGTCTGCAAGGATCTAGAATGTGATGGTTGAGCTAGTTCAACACCTT  
CCTCTCGAATCGTCTCCTGTGT

>2006

CTTTTCTTGTGTTTACACATTCTTTTCCAGTAGCCTCACGGGCACACCAGTCTGCAA  
GGATCTAGAATGTGATGGTTTGTGCTAGTTCAACACCTTCTCTCGAATCGTCTCCTGT  
GTCCTCATGTTTTGTGGTCTCT

>2007

TTGTGTTTACACATTCTTTTCCAGTAGCCTCACGGGCACACCAGTCTGCAAGGATCT  
AGAATGTGATGGTTTGTGCTAGTTCAACACCTTCTCTCGAATCGTCTCCTGTGTCCTC  
ATGTTTTGTGGTCTCTGCCCTC

>2008

CGGGCACACCAGTCTGCAAGGATCTAGAATGTGATGGTTTGTGCTAGTTCAACACCT  
TCTCTCGAATCGTCTCCTGTGTCCTCATGTTTTGTGGTCTCTGCCCTCTTCCCAGGCAC  
CCAAGTGCAGACTTTGGCATCA

>2009

ACCAGTCTGCAAGGATCTAGAATGTGATGGTTTGTGCTAGTTCAACACCTTCTCTCG  
AATCGTCTCCTGTGTCCTCATGTTTTGTGGTCTCTGCCCTCTTCCCAGGCACCCAAGT  
CAGACTTTGGCATCATCTGTGG

>2010

CAGTCCTGCAAGGATCTAGAATGTGATGGTTTGAGCTAGTTCAACACCTTCCTCTCGAA  
TCGTCTCCTGTGTCCTCATGTTTTGTGGTCTCTGCCCTCTCCCAGGCACCCAACTGCA  
GACTTTGGCATCATCTGTGGCT

>2011

ATCTAGAATGTGATGGTTTGAGCTAGTTCAACACCTTCCTCTCGAATCGTCTCCTGTGT  
CCTCATGTTTTGTGGTCTCTGCCCTCTCCCAGGCACCCAACTGCAGACTTTGGCATCA  
TCTGTGGCTCCTGTCTCCCTT

>2012

TCCTGTGTCCTCATGTTTTGTGGTCTCTGCCCTCTCCCAGGCACCCAACTGCAGACTT  
TGGCATCATCTGTGGCTCCTGTCTCCCTTGCCTTCCATATCCACCATTGCTCTCCA  
GCCTACTTAACCAGATGGCTG

>2013

CTCATGTTTTGTGGTCTCTGCCCTCTCCCAGGCACCCAACTGCAGACTTTGGCATCAT  
CTGTGGCTCCTGTCTCCCTTGCCTTCCATATCCACCATTGCTCTCCAGCCTACTTA  
ACCAGATGGCTGTCTGATTT

>2014

TGTGGCTCCTGTCTCCCTTGCCTTCCATATCCACCATTGCTCTCCAGCCTACTTAA  
CCAGATGGCTGTCTGATTTCCCTCACCAGCCTTCCCTGCAGTGCACCCCTGCAAGGCTCA  
TCACCCCACTTCCCTGAGCAG

>2015

TATCCACCATTGCTCTCCAGCCTACTTAACCAGATGGCTGTCTGATTTCCCTCACCAG  
CCTTCCCTGCAGTGCACCCCTGCAAGGCTCATCACCCCACTTCCCTGAGCAGAGTAGGG  
CTCTGATGGGGTTGCTCTCCTG

>2016

TCCTGATTTCCCTCACCAGCCTTCCCTGCAGTGCACCCCTGCAAGGCTCATCACCCCACT  
CCCTGAGCAGAGTAGGGCTCTGATGGGGTTGCTCTCCTGCTCTGAACCCTGCAGTGGC  
TCACTATGGCCTATTCTAGAGAA

>2017

AGCCTTCCCTGCAGTGCACCCCTGCAAGGCTCATCACCCCACTTCCCTGAGCAGAGTAG  
GGCTCTGATGGGGTTGCTCTCCTGCTCTGAACCCTGCAGTGGCTCACTATGGCCTATTC  
TAGAGAAGAAACGAGAGAATTCT

>2018

GGCTCATCACCCCACTTCCCTGAGCAGAGTAGGGCTCTGATGGGGTTGCTCTCCTGCTC  
TGAACCCTGCAGTGGCTCACTATGGCCTATTCTAGAGAAGAAACGAGAGAATTCTTAG  
CGTGGCATTCAAAGCCATCCGGG

>2019

CTCTCCTGCTCTGAACCCTGCAGTGGCTCACTATGGCCTATTCTAGAGAAGAAACGAG  
AGAATTCTTAGCGTGGCATTCAAAGCCATCCGGGATCCTAGATTCCAGCTACATTTTCA  
CTCTTCATCCCTTTCTCTGCATA

>2020

AGCCATCCGGGATCCTAGATTCCAGCTACATTTTCACTCTTCATCCCTTTCTCTGCATATT  
TCTTAGAATGTACACCCCTGAAGGCAGGGACCATCTTTTTCACATCTGTGTTACAACCT  
TTTAGTCCACTCTTAGCAT

>2021

CTTCATCCCTTTCTCTGCATATTTCTTAGAATGTACACCCCTGAAGGCAGGGACCATCTT

TTTCACATCTGTGTTACAACCTTTTAGTCCACTCTCTAGCATATGGCAACTCAGCAGATG  
CTGCTGTTGAGTAAACTCTT

>2022

TCATCCCTTTCTCTGCATATTTCTTAGAATGTACACCCCTGAAGGCAGGGACCATCTTTT  
TCACATCTGTGTTACAACCTTTTAGTCCACTCTCTAGCATATGGCAACTCAGCAGATGCT  
GCTGTTGAGTAAACTCTTAT

>2023

GCATATTTCTTAGAATGTACACCCCTGAAGGCAGGGACCATCTTTTTTACATCTGTGTTA  
CAACCTTTTAGTCCACTCTCTAGCATATGGCAACTCAGCAGATGCTGCTGTTGAGTAAA  
CTCTTATGCTTCCCTTCCCAT

>2024

ATCTTTTTTACATCTGTGTTACAACCTTTTAGTCCACTCTCTAGCATATGGCAACTCAGC  
AGATGCTGCTGTTGAGTAAACTCTTATGCTTCCCTTCCCATGCCATATCCTTCTCTGGTC  
ATCGCAACAGGGCCAAATCT

>2025

TTTCACATCTGTGTTACAACCTTTTAGTCCACTCTCTAGCATATGGCAACTCAGCAGATG  
CTGCTGTTGAGTAAACTCTTATGCTTCCCTTCCCATGCCATATCCTTCTCTGGTCATCGC  
AACAGGGCCAAATCTCTCAT

>2026

ATGGCAACTCAGCAGATGCTGCTGTTGAGTAAACTCTTATGCTTCCCTTCCCATGCCATA  
TCCTTCTCTGGTCATCGCAACAGGGCCAAATCTCTCATGCTTCAGTGAAATGCCCTCT  
CCTTGCAGCATCCTTTCCTGG

>2027

TCTTATGCTTCCCTTCCCATGCCATATCCTTCTCTGGTCATCGCAACAGGGCCAAATCTC  
TCATGCTTCAGTGAAATGCCCTCTCCTTGCAGCATCCTTTCCTGGGGCATTCTTCTCTCC  
TTGCATCCAGTTGGAATAA

>2028

TTATGCTTCCCTTCCCATGCCATATCCTTCTCTGGTCATCGCAACAGGGCCAAATCTCTC  
ATGCTTCAGTGAAATGCCCTCTCCTTGCAGCATCCTTTCCTGGGGCATTCTTCTCTCTC  
GCATCCAGTTGGAATAATA

>2029

CTCATGCTTCAGTGAAATGCCCTCTCCTTGCAGCATCCTTTCCTGGGGCATTCTTCTCTC  
CTTGCATCCAGTTGGAATAATATGTCCCTCCATTGGAGCTCCCACACCAGAAGAGGTA  
TAGATAAAGCCAGATACTTCT

>2030

TAAATGCCCTCTCCTTGCAGCATCCTTTCCTGGGGCATTCTTCTCCTTGCATCCAGTTG  
GAAATAATATGTCCCTCCATTGGAGCTCCCACACCAGAAGAGGTATAGATAAAGCCAGA  
TACTTCTTTTTTTTTTTTTTTT

>2031

GGGCATTCTTCTCCTTGCATCCAGTTGGAATAATATGTCCCTCCATTGGAGCTCCCAC  
ACCAGAAGAGGTATAGATAAAGCCAGATACTTCTTTTTTTTTTTTTTTTTTGTATACAGA  
GTCTCACTCTGTTGCCAGG

>2032

GAGCTCCCACACCAGAAGAGGTATAGATAAAGCCAGATACTTCTTTTTTTTTTTTTTTTTT  
TTGATACAGAGTCTCACTCTGTTGCCAGGCTGGAGGTAGTGGCATGAACTGGGCTC  
ACTGCAGCCTCTGCCTCTTGGG

>2033

ACCAGAAGAGGTATAGATAAAGCCAGATACTCTTTTTTTTTTTTTTTTTTTGATACAGA  
GTCTCACTCTGTTGCCAGGCTGGAGTGTAGTGGCATGAACTTGGCTCACTGCAGCCT  
CTGCCTCTTGGGTTCAAGTGAT

>2034

GATAAAGCCAGATACTCTTTTTTTTTTTTTTTTTTTGATACAGAGTCTCACTCTGTTGCC  
CAGGCTGGAGTGTAGTGGCATGAACTTGGCTCACTGCAGCCTCTGCCTCTTGGGTTCA  
AGTGATTCTTTCGTCTCAGCC

>2035

AGCCAGATACTCTTTTTTTTTTTTTTTTTTTGATACAGAGTCTCACTCTGTTGCCAGG  
CTGGAGTGTAGTGGCATGAACTTGGCTCACTGCAGCCTCTGCCTCTTGGGTTCAAGTG  
ATTCTTTCGTCTCAGCCTCCCG

>2036

AGTCTCACTCTGTTGCCAGGCTGGAGTGTAGTGGCATGAACTTGGCTCACTGCAGCC  
TCTGCCTCTTGGGTTCAAGTGATTCTTTCGTCTCAGCCTCCCGAGTAGCTGAGATTACA  
GACATGCGCTACCATGCCTGGCT

>2037

ACTCTGTTGCCAGGCTGGAGTGTAGTGGCATGAACTTGGCTCACTGCAGCCTCTGCC  
TCTTGGGTTCAAGTGATTCTTTCGTCTCAGCCTCCCGAGTAGCTGAGATTACAGACATG  
CGCTACCATGCCTGGCTAATTTT

>2038

CAGGCTGGAGTGTAGTGGCATGAACTTGGCTCACTGCAGCCTCTGCCTCTTGGGTTCA  
AGTGATTCTTTCGTCTCAGCCTCCCGAGTAGCTGAGATTACAGACATGCGCTACCATGC  
CTGGCTAATTTTGTATTTTGTAG

>2039

TGGCATGAACTTGGCTCACTGCAGCCTCTGCCTCTTGGGTTCAAGTGATTCTTTCGTCT  
CAGCCTCCCGAGTAGCTGAGATTACAGACATGCGCTACCATGCCTGGCTAATTTTGT  
TTTTTAGTAGAGATGCGGTTTC

>2040

TGATTCTTTCGTCTCAGCCTCCCGAGTAGCTGAGATTACAGACATGCGCTACCATGCCT  
GGCTAATTTTGTATTTTGTAGTAGAGATGCGGTTTCACCATGCTGGCCAGGCTGGTCCCC  
AACTCCTCGCCTCAAGTGATC

>2041

CGTCTCAGCCTCCCGAGTAGCTGAGATTACAGACATGCGCTACCATGCCTGGCTAATTT  
TTGATTTTGTAGTAGAGATGCGGTTTCACCATGCTGGCCAGGCTGGTCCCCAACTCCTC  
GCCTCAAGTGATCTTCTGCCT

>2042

ATGCGCTACCATGCCTGGCTAATTTTGTATTTTGTAGTAGAGATGCGGTTTCACCATGCT  
GGCCAGGCTGGTCCCCAACTCCTCGCCTCAAGTGATCTTCTGCCTTAGCCTCCAGAG  
GTGCTAGGATTACAGGTGTGAG

>2043

ATTTTGTATTTTGTAGTAGAGATGCGGTTTCACCATGCTGGCCAGGCTGGTCCCCAACTC  
CTCGCCTCAAGTGATCTTCTGCCTTAGCCTCCAGAGTGCTAGGATTACAGGTGTGAG  
TCACTGTGCCCGCCTGGATC

>2044

TTTCACCATGCTGGCCAGGCTGGTCCCCAACTCCTCGCCTCAAGTGATCTTCTGCCTT

AGCCTCCAGAGTGCTAGGATTACAGGTGTGAGTCACTGTGCCCGCCTGGATCTTTTA  
TTGTTTGATTCTGTTCAATT

>2045

CAGGCTGGTCCCCAACTCCTCGCCTCAAGTGATCTTCTGCCTTAGCCTCCAGAGTGC  
TAGGATTACAGGTGTGAGTCACTGTGCCCGCCTGGATCTTTATTGTTTGATTCTGT  
TCATTTCTCCCTAAGAAACC

>2046

GGCTGGTCCCCAACTCCTCGCCTCAAGTGATCTTCTGCCTTAGCCTCCAGAGTGCTA  
GGATTACAGGTGTGAGTCACTGTGCCCGCCTGGATCTTTATTGTTTGATTCTGTTT  
ATTTCTCCCTAAGAAACCCC

>2047

CAACTCCTCGCCTCAAGTGATCTTCTGCCTTAGCCTCCAGAGTGCTAGGATTACAGG  
TGTGAGTCACTGTGCCCGCCTGGATCTTTATTGTTTGATTCTGTTCAATTTCTCCCT  
AAGAAACCCACGTTTTTGT

>2048

TCCTGCCTTAGCCTCCAGAGTGCTAGGATTACAGGTGTGAGTCACTGTGCCCGCCT  
GGATCTTTATTGTTTGATTCTGTTCAATTTCTCCCTAAGAAACCCACGTTTTTGTGG  
GCAGGACCTGGAATCCTATTC

>2049

GAGTCACTGTGCCCGCCTGGATCTTTATTGTTTGATTCTGTTCAATTTCTCCCTAA  
GAAACCCACGTTTTTGTGGGCAGGACCTGGAATCCTATTAGTTATACAGCCCCGCTT  
CGTCCACTGCTCCCCTCAGA

>2050

CTGTGCCCGCCTGGATCTTTATTGTTTGATTCTGTTCAATTTCTCCCTAAGAAACC  
CCACGTTTTTGTGGGCAGGACCTGGAATCCTATTAGTTATACAGCCCCGCTTCGTTCA  
CTGCTCCCCTCAGAGTCTAG

>2051

TTTGTATTCTGTTCAATTTCTCCCTAAGAAACCCACGTTTTTGTGGGCAGGACCTGG  
AATCCTATTAGTTATACAGCCCCGCTTCGTTCACTGCTCCCCTCAGAGTCTAGTGCCC  
TGGACATCATAGGTATTAGT

>2052

TCTCCCTAAGAAACCCACGTTTTTGTGGGCAGGACCTGGAATCCTATTAGTTATAC  
AGCCCCGCTTCGTTCACTGCTCCCCTCAGAGTCTAGTGCCCTGGACATCATAGGTATT  
CAGTACCTCTTGCTGGCTTAGG

>2053

GTTTTTGTGGGCAGGACCTGGAATCCTATTAGTTATACAGCCCCGCTTCGTTCACTGC  
TCCCCTCAGAGTCTAGTGCCCTGGACATCATAGGTATTAGTACCTCTTGCTGGCTTAG  
GAACAGGAGGATGCCTGATGG

>2054

TCCTATTAGTTATACAGCCCCGCTTCGTTCACTGCTCCCCTCAGAGTCTAGTGCCCTG  
GACATCATAGGTATTAGTACCTCTTGCTGGCTTAGGAACAGGAGGATGCCTGATGGCC  
AGGGTGTTCCTCTGAAGCAGT

>2055

GTGCCCTGGACATCATAGGTATTAGTACCTCTTGCTGGCTTAGGAACAGGAGGATGCC  
TGATGGCCAGGGTGTTCCTCTGAAGCAGTGGTGGCTGAGCTTTTGAATATCTGCATTG  
TGCTAAGGGTTAACTACCCAGG

>2056

GCCCTGGACATCATAGGTATTCAGTACCTCTTGCTGGCTTAGGAACAGGAGGATGCCTG  
ATGGCCAGGGTGTTCCTCTGAAGCAGTGGTGGCTGAGCTTTTTGAATATCTGCATTGTG  
CTAAGGGTAACTACCCAGGCA

>2057

AGGTATTCAGTACCTCTTGCTGGCTTAGGAACAGGAGGATGCCTGATGGCCAGGGTGT  
TCCTCTGAAGCAGTGGTGGCTGAGCTTTTTGAATATCTGCATTGTGCTAAGGGTAACT  
ACCCAGGCAGTACTGGTGGGGAA

>2058

TATTCAGTACCTCTTGCTGGCTTAGGAACAGGAGGATGCCTGATGGCCAGGGTGTTCCT  
CTGAAGCAGTGGTGGCTGAGCTTTTTGAATATCTGCATTGTGCTAAGGGTAACTACCC  
AGGCAGTACTGGTGGGGAAAGG

>2059

CAGGAGGATGCCTGATGGCCAGGGTGTTCCTCTGAAGCAGTGGTGGCTGAGCTTTTTG  
AATATCTGCATTGTGCTAAGGGTAACTACCCAGGCAGTACTGGTGGGGAAAGGGCCCC  
AGAAGCAGGCCCAGACTCAGGTAT

>2060

GCCTGATGGCCAGGGTGTTCCTCTGAAGCAGTGGTGGCTGAGCTTTTTGAATATCTGCA  
TTGTGCTAAGGGTAACTACCCAGGCAGTACTGGTGGGGAAAGGGCCCCAGAAGCAGG  
CCCAGACTCAGGTATTGTTAAAGC

>2061

CTGAAGCAGTGGTGGCTGAGCTTTTTGAATATCTGCATTGTGCTAAGGGTAACTACCC  
AGGCAGTACTGGTGGGGAAAGGGCCCCAGAAGCAGGCCCAGACTCAGGTATTGTTAAA  
GCAGAGTCATCTTTGCTCTGAAGT

>2062

CATTGTGCTAAGGGTAACTACCCAGGCAGTACTGGTGGGGAAAGGGCCCCAGAAGCA  
GGCCCAGACTCAGGTATTGTTAAAGCAGAGTCATCTTTGCTCTGAAGTTTTTTCTTTTAT  
CTTTCTTTTCTTTTTTAATTGG

>2063

TGCTAAGGGTAACTACCCAGGCAGTACTGGTGGGGAAAGGGCCCCAGAAGCAGGCC  
AGACTCAGGTATTGTTAAAGCAGAGTCATCTTTGCTCTGAAGTTTTTTCTTTTATCTTT  
CTTTCTTTTTTAATTGGGGAA

>2064

TGGTGGGGAAAGGGCCCCAGAAGCAGGCCCAGACTCAGGTATTGTTAAAGCAGAGTCA  
TCTTTGCTCTGAAGTTTTTTCTTTTATCTTTCTTTCTTTTTTAATTGGGGGAAACCTTG  
TCCTAATTGGCATCTTTATTGT

>2065

AGCAGAGTCATCTTTGCTCTGAAGTTTTTTCTTTTATCTTTCTTTCTTTTTTAATTGGG  
GGAAACCTTGCTAATTGGCATCTTTATTGTGGCAGGAATAGGCCAGGCAGGGCTGG  
GGGAGTGTGAAGTCTGTGAAG

>2066

AAGTTTTTTCTTTTATCTTTCTTTCTTTTTAATTGGGGGAAACCTTGCTAATTGGC  
ATCTTTATTGTGGCAGGAATAGGCCAGGCAGGGCTGGGGGAGTGTGAAGTCTGTGAAG  
GGAGGTGGCCTGGGGGCCCC

>2067

TAATTGGGGGAAACCTTGCTAATTGGCATCTTTATTGTGGCAGGAATAGGCCAGGCA



GGGCTGGGGGAGTGTGAAGTCTGTGAAGGGAGGTGGCCTGGGGGCCCCCCCACACAA  
TGCCTGATTGTGCAGGCATAGGTA

>2068

AACCTTGTCTAATTGGCATCTTTATTGTGGCAGGAATAGGCCAGGCAGGGCTGGGGG  
AGTGTGAAGTCTGTGAAGGGAGGTGGCCTGGGGGCCCCCCCACACAATGCCTGATTG  
TGCAGGCATAGGTATGAACACATTG

>2069

TAATTGGCATCTTTATTGTGGCAGGAATAGGCCAGGCAGGGCTGGGGGAGTGTGAAGT  
CTGTGAAGGGAGGTGGCCTGGGGGCCCCCCCACACAATGCCTGATTGTGCAGGCATAG  
GTATGAACACATTGCAGCCTGTGT

>2070

GGCAGGGCTGGGGGAGTGTGAAGTCTGTGAAGGGAGGTGGCCTGGGGGCCCCCCA  
CACAATGCCTGATTGTGCAGGCATAGGTATGAACACATTGCAGCCTGTGTGCACCCAC  
AGGGTGACCACGAGCAAGGCCTGGGG

>2071

GGAGGTGGCCTGGGGGCCCCCCCACACAATGCCTGATTGTGCAGGCATAGGTATGAAC  
ACATTGCAGCCTGTGTGCACCCACAGGGTGACCACGAGCAAGGCCTGGGGACGAGGA  
CTACGAGGCCTGCAGCTGGGTCTCTC

>2072

AGGTGGCCTGGGGGCCCCCCCACACAATGCCTGATTGTGCAGGCATAGGTATGAACAC  
ATTGCAGCCTGTGTGCACCCACAGGGTGACCACGAGCAAGGCCTGGGGACGAGGACT  
ACGAGGCCTGCAGCTGGGTCTCTT

>2073

CAGCCTGTGTGCACCCACAGGGTGACCACGAGCAAGGCCTGGGGACGAGGACTACGA  
GGCCTGCAGCTGGGTCTCTTTTCTCCCTCTCACCCCCACCCAGTACCCACGTGATTG  
GGCCACATCCCAGTAACAAGCAGT

>2074

GCAAGGCCTGGGGACGAGGACTACGAGGCCTGCAGCTGGGTCTCTTTTCTCCCTCT  
CACCCCCACCCAGTACCCACGTGATTGGGCCACATCCCAGTAACAAGCAGTCCTTGTG  
GAAGAGCCTTCATGAAGACCTTTG

>2075

TGGGGACGAGGACTACGAGGCCTGCAGCTGGGTCTCTTTTCTCCCTCTCACCCCCA  
CCCAGTACCCACGTGATTGGGCCACATCCCAGTAACAAGCAGTCCTTGTGGAAGAGCC  
TTCATGAAGACCTTTGCTGGGAGT

>2076

GCCTGCAGCTGGGTCTCTTTTCTCCCTCTCACCCCCACCCAGTACCCACGTGATTGG  
GCCACATCCCAGTAACAAGCAGTCCTTGTGGAAGAGCCTTCATGAAGACCTTTGCTGG  
GAGTGGCGGGCAGGGATCTGCGG

>2077

GGGTCTCTTTTCTCCCTCTCACCCCCACCCAGTACCCACGTGATTGGGCCACATCCC  
AGTAACAAGCAGTCCTTGTGGAAGAGCCTTCATGAAGACCTTTGCTGGGAGTGGCGG  
GCAGGGATCTGCGGGGAGCGTTGC

>2078

ACGTGATTGGGCCACATCCCAGTAACAAGCAGTCCTTGTGGAAGAGCCTTCATGAAGA  
CCTTTGCTGGGAGTGGCGGGCAGGGATCTGCGGGGAGCGTTGCTGGTTCAAGCTGGG  
GCTTTCCTATGGATGATGTCCTGTG

>2079

AAGCAGTCCTTGTGGAAGAGCCTTCATGAAGACCTTTGCTGGGAGTGGCGGGCAGGG  
ATCTGCGGGGAGCGTTGCTGGTTCAAGCTGGGGCTTCTATGGATGATGTCCTGTGAA  
GGGTAGATCCTGGAGGGACAGACA

>2080

TGCTGGGAGTGGCGGGCAGGGATCTGCGGGGAGCGTTGCTGGTTCAAGCTGGGGCTT  
TCCTATGGATGATGTCCTGTGAAGGGTAGATCCTGGAGGGACAGACAGGTGTCTGATC  
TTTGGCAGGCAGGGATGTCTCATTT

>2081

GGAGTGGCGGGCAGGGATCTGCGGGGAGCGTTGCTGGTTCAAGCTGGGGCTTCTAT  
GGATGATGTCCTGTGAAGGGTAGATCCTGGAGGGACAGACAGGTGTCTGATCTTTGGC  
AGGCAGGGATGTCTCATTTGTACA

>2082

TTGCTGGTTCAAGCTGGGGCTTCTATGGATGATGTCCTGTGAAGGGTAGATCCTGGA  
GGGACAGACAGGTGTCTGATCTTTGGCAGGCAGGGATGTCTCATTTGTACATTATAGGT  
ATTCAGTATCTCTTGCTGGCTT

>2083

ATGGATGATGTCCTGTGAAGGGTAGATCCTGGAGGGACAGACAGGTGTCTGATCTTTG  
GCAGGCAGGGATGTCTCATTTGTACATTATAGGTATTCAGTATCTCTTGCTGGCTTAGGC  
TTCATAATGTCTCATTTGTACA

>2084

GTCCTGTGAAGGGTAGATCCTGGAGGGACAGACAGGTGTCTGATCTTTGGCAGGCAG  
GGATGTCTCATTTGTACATTATAGGTATTCAGTATCTCTTGCTGGCTTAGGCTTCATAATG  
TCTCATTTGTACATCATAGCCT

>2085

CCTGGAGGGACAGACAGGTGTCTGATCTTTGGCAGGCAGGGATGTCTCATTTGTACATT  
ATAGGTATTCAGTATCTCTTGCTGGCTTAGGCTTCATAATGTCTCATTTGTACATCATAGC  
CTTCAGTACCTCTTGCTGAT

>2086

TGGCAGGCAGGGATGTCTCATTTGTACATTATAGGTATTCAGTATCTCTTGCTGGCTTAG  
GCTTCATAATGTCTCATTTGTACATCATAGCCTTCAGTACCTCTTGCTGATTTGGTTAACC  
CAGTTGTTATACCACGATA

>2087

GGGATGTCTCATTTGTACATTATAGGTATTCAGTATCTCTTGCTGGCTTAGGCTTCATAAT  
GTCTCATTTGTACATCATAGCCTTCAGTACCTCTTGCTGATTTGGTTAACCCAGTTGTTAT  
ACCACGATATTGATTTTT

>2088

CATTATAGGTATTCAGTATCTCTTGCTGGCTTAGGCTTCATAATGTCTCATTTGTACATCA  
TAGCCTTCAGTACCTCTTGCTGATTTGGTTAACCCAGTTGTTATACCACGATATTGATTTTT  
TCATGCCATTTCTTTAG

>2089

GGCTTAGGCTTCATAATGTCTCATTTGTACATCATAGCCTTCAGTACCTCTTGCTGATTTG  
GTTAACCCAGTTGTTATACCACGATATTGATTTTTCATGCCATTTCTTTAGGAAGATTGG  
AAGATCATTGAGGATAGG

>2090

TTAGGCTTCATAATGTCTCATTTGTACATCATAGCCTTCAGTACCTCTTGCTGATTTGGTT

AACCCAGTTGTTATACCACGATATTGATTTTTTCATGCCATTTTCTTTAGGAAGATTGGAA  
GATCATTGAGGATAGGGAC

>2091

TTATACCACGATATTGATTTTTTCATGCCATTTTCTTTAGGAAGATTGGAAGATCATTGAG  
GATAGGGACTGTGACCTTTTCTTTTTTCTACCCCAGTACCCAACCTGGCAGGTAGCAC  
AGCGCAATGATCCACGATGTT

>2092

CCATTTTCTTTAGGAAGATTGGAAGATCATTGAGGATAGGGACTGTGACCTTTTCTTTTT  
TTCTACCCCAGTACCCAACCTGGCAGGTAGCACAGCGCAATGATCCACGATGTTAATA  
GGTTGAATTGTAGAGGGGGCC

>2093

GATTGGAAGATCATTGAGGATAGGGACTGTGACCTTTTCTTTTTTCTACCCCAGTACC  
CAACCTGGCAGGTAGCACAGCGCAATGATCCACGATGTTAATAGGTTGAATTGTAGA  
GGGGCCTCTGATTCCAAAGATG

>2094

ACTGTGACCTTTTCTTTTTTCTACCCCAGTACCCAACCTGGCAGGTAGCACAGCGCAA  
TGATCCACGATGTTAATAGGTTGAATTGTAGAGGGGGCCTCTGATTCCAAAGATGGGG  
GCAGAATATCAGTCCTCTCCAG

>2095

TTTTCTTTTTTCTACCCCAGTACCCAACCTGGCAGGTAGCACAGCGCAATGATCCACG  
ATGTTAATAGGTTGAATTGTAGAGGGGGCCTCTGATTCCAAAGATGGGGGCAGAATAT  
CAGTCCTCTCCAGACTGCCTGG

>2096

TGATCCACGATGTTAATAGGTTGAATTGTAGAGGGGGCCTCTGATTCCAAAGATGGGG  
GCAGAATATCAGTCCTCTCCAGACTGCCTGGGAATCCTCTCTCCAGCCTGGGCCTG  
GCCAGTGGGAGACAGAGGCTGC

>2097

GATGGGGGCAGAATATCAGTCCTCTCCAGACTGCCTGGGAATCCTCTCTCTCCAGCCT  
GGGCCTGGCCAGTGGGAGACAGAGGCTGCTGAAGTAGCTGGCAAGGAGGCAAAGAA  
GATGATGACCTAGCTACGGTCCTCA

>2098

TCTCCAGACTGCCTGGGAATCCTCTCTCTCCAGCCTGGGCCTGGCCAGTGGGAGACA  
GAGGCTGCTGAAGTAGCTGGCAAGGAGGCAAAGAAGATGATGACCTAGCTACGGTCC  
TCATGTGCCACTGGGAATCATCT

>2099

CTGGCCAGTGGGAGACAGAGGCTGCTGAAGTAGCTGGCAAGGAGGCAAAGAAGATG  
ATGACCTAGCTACGGTCCTCATGTGCCACTGGGAATCATCTTTTGCATCTGAGTTA  
GTCAATGTGCTGTGCATTCTCTGCA

>2100

TGGGAGACAGAGGCTGCTGAAGTAGCTGGCAAGGAGGCAAAGAAGATGATGACCTAG  
CTACGGTCCTCATGTGCCACTGGGAATCATCTTTTGCATCTGAGTTAGTCAATGTG  
CTGTGCATTCTCTGCAGAATTTGT

>2101

GAGGCAAAGAAGATGATGACCTAGCTACGGTCCTCATGTGCCACTGGGAATCATCT  
TTTTGCATCTGAGTTAGTCAATGTGCTGTGCATTCTCTGCAGAATTTGTGAACCTGGTAT  
AGGTATGAGGTGAGAGAGGCCA

>2102

CAAAGAAGATGATGACCTAGCTACGGTCCTCATGTGCCCACTGGGGAATCATCTTTTTG  
CATCTGAGTTAGTCAATGTGCTGTGCATTCTCTGCAGAATTTGTGAACCTGGTATAGGTA  
TGAGGTGAGAGAGGCCAGGAG

>2103

AGATGATGACCTAGCTACGGTCCTCATGTGCCCACTGGGGAATCATCTTTTTGCATCTG  
AGTTAGTCAATGTGCTGTGCATTCTCTGCAGAATTTGTGAACCTGGTATAGGTATGAGG  
TGAGAGAGGCCAGGAGGTCTGG

>2104

ATGACCTAGCTACGGTCCTCATGTGCCCACTGGGGAATCATCTTTTTGCATCTGAGTTA  
GTCAATGTGCTGTGCATTCTCTGCAGAATTTGTGAACCTGGTATAGGTATGAGGTGAGA  
GAGGCCAGGAGGTCTGGCTGCT

>2105

ATGTGCCCACTGGGGAATCATCTTTTTGCATCTGAGTTAGTCAATGTGCTGTGCATTCTC  
TGCAGAATTTGTGAACCTGGTATAGGTATGAGGTGAGAGAGGCCAGGAGGTCTGGCTG  
CTCCCCCTCTAGACTTCGCAGG

>2106

TTTTTGCATCTGAGTTAGTCAATGTGCTGTGCATTCTCTGCAGAATTTGTGAACCTGGTA  
TAGGTATGAGGTGAGAGAGGCCAGGAGGTCTGGCTGCTCCCCCTCTAGACTTCGCAGG  
TAAAACCCAAGGTGTGTGCCAC

>2107

GTCAATGTGCTGTGCATTCTCTGCAGAATTTGTGAACCTGGTATAGGTATGAGGTGAGA  
GAGGCCAGGAGGTCTGGCTGCTCCCCCTCTAGACTTCGCAGGTAAAACCCAAGGTGT  
GTGCCACGTAAAGGTTTCAGAGGTT

>2108

TGTGAACCTGGTATAGGTATGAGGTGAGAGAGGCCAGGAGGTCTGGCTGCTCCCCCTC  
TAGACTTCGCAGGTAAAACCCAAGGTGTGTGCCACGTAAAGGTTTCAGAGGTTTATAG  
GCATCCAGATAGCACATGTGGGTC

>2109

ATAGGTATGAGGTGAGAGAGGCCAGGAGGTCTGGCTGCTCCCCCTCTAGACTTCGCAG  
GTAAAACCCAAGGTGTGTGCCACGTAAAGGTTTCAGAGGTTTATAGGCATCCAGATAG  
CACATGTGGGTCTCTGCCCTGCT

>2110

GTGAGAGAGGCCAGGAGGTCTGGCTGCTCCCCCTCTAGACTTCGCAGGTAAAACCCA  
AGGTGTGTGCCACGTAAAGGTTTCAGAGGTTTATAGGCATCCAGATAGCACATGTGGG  
TCTCTGCCCTGCTTGCAGCCTCCC

>2111

GAGGCCAGGAGGTCTGGCTGCTCCCCCTCTAGACTTCGCAGGTAAAACCCAAGGTGT  
GTGCCACGTAAAGGTTTCAGAGGTTTATAGGCATCCAGATAGCACATGTGGGTCTCTGC  
CCCTGCTTGCAGCCTCCCTGGGGC

>2112

GAGGTCTGGCTGCTCCCCCTCTAGACTTCGCAGGTAAAACCCAAGGTGTGTGCCACGT  
AAAGGTTTCAGAGGTTTATAGGCATCCAGATAGCACATGTGGGTCTCTGCCCTGCTTG  
CAGCCTCCCTGGGGCAGCCAGCC

>2113

TTCGCAGGTAAAACCCAAGGTGTGTGCCACGTAAAGGTTTCAGAGGTTTATAGGCATC

CAGATAGCACATGTGGGTCTCTGCCCTGCTTGCAGCCTCCCTGGGGCAGCCAGCCAG  
GCTCAGGGCAGGAAGCTGCTGATT

>2114

GTCTCTGCCCCTGCTTGCAGCCTCCCTGGGGCAGCCAGCCAGGCTCAGGGCAGGAAG  
CTGCTGATTCTGGGTCACTTGGCTGCTCTTGCTTGCTGCTGCTGTGATTGTTCTACAGT  
TAAGATCTTAGCTCCATAAGGGA

>2115

GCAGCCAGCCAGGCTCAGGGCAGGAAGCTGCTGATTCTGGGTCACTTGGCTGCTCTTG  
CTTGCTGCTGCTGTGATTGTTCTACAGTTAAGATCTTAGCTCCATAAGGGACATACGG  
AGGTCATCTAGGTCATCTCATGG

>2116

AGCCAGGCTCAGGGCAGGAAGCTGCTGATTCTGGGTCACTTGGCTGCTCTTGCTTGCT  
GCTGCTGTGATTGTTCTACAGTTAAGATCTTAGCTCCATAAGGGACATACGGAGGTCA  
TCTAGGTCATCTCATGGCTCTCA

>2117

CTGCTCTTGCTTGCTGCTGCTGTGATTGTTCTACAGTTAAGATCTTAGCTCCATAAGGG  
ACATACGGAGGTCATCTAGGTCATCTCATGGCTCTCAGGCAAGAAAAGTAGCATTATTG  
CTCTCATGCCACTTTATGGA

>2118

CTTGCTGCTGCTGTGATTGTTCTACAGTTAAGATCTTAGCTCCATAAGGGACATACGG  
AGGTCATCTAGGTCATCTCATGGCTCTCAGGCAAGAAAAGTAGCATTATTGCTCTCATG  
CCCCTTTATGGATAAGTGACC

>2119

TTAAGATCTTAGCTCCATAAGGGACATACGGAGGTCATCTAGGTCATCTCATGGCTCTC  
AGGCAAGAAAAGTAGCATTATTGCTCTCATGCCACTTTATGGATAAGTGACCGAGGCC  
TGCAGAGGCAGAGTGGCTATTC

>2120

ATCTAGGTCATCTCATGGCTCTCAGGCAAGAAAAGTAGCATTATTGCTCTCATGCCAC  
TTTATGGATAAGTGACCGAGGCCTGCAGAGGCAGAGTGGCTATTCCAGCCATTAAATGT  
GGCTCCCTGCTATTCTGTTCCC

>2121

GGCAAGAAAAGTAGCATTATTGCTCTCATGCCACTTTATGGATAAGTGACCGAGGCCT  
GCAGAGGCAGAGTGGCTATTCCAGCCATTAAATGTGGCTCCCTGCTATTCTGTTCCCTG  
CCAGGATATTCTGTGGATGGTT

>2122

CTCTCATGCCACTTTATGGATAAGTGACCGAGGCCTGCAGAGGCAGAGTGGCTATTCC  
AGCCATTAAATGTGGCTCCCTGCTATTCTGTTCCCTGCCAGGATATTCTGTGGATGGTTA  
GGGGAGGGTCTTACCTCAGC

>2123

GGATAAGTGACCGAGGCCTGCAGAGGCAGAGTGGCTATTCCAGCCATTAAATGTGGCT  
CCCTGCTATTCTGTTCCCTGCCAGGATATTCTGTGGATGGTTAGGGGAGGGTCTTACC  
TCAGCTAACGAGGTGCATTTTCT

>2124

CAGAGGCAGAGTGGCTATTCCAGCCATTAAATGTGGCTCCCTGCTATTCTGTTCCCTGC  
CAGGATATTCTGTGGATGGTTAGGGGAGGGTCTTACCTCAGCTAACGAGGTGCATTTT  
CTGTGGGGTGAGGCCATTCTTG

>2125

AGAGTGGCTATTCCAGCCATTAATGTGGCTCCCTGCTATTCTGTTCCCTGCCAGGATAT  
TCTGTGGATGGTTAGGGGAGGGGTCTTACCTCAGCTAACGAGGTGCATTTTCTGTGGG  
GTGAGGCCATTCTTGCTACTTA

>2126

CCAGCCATTAATGTGGCTCCCTGCTATTCTGTTCCCTGCCAGGATATTCTGTGGATGGT  
TAGGGGAGGGGTCTTACCTCAGCTAACGAGGTGCATTTTCTGTGGGGTGAGGCCATTC  
TTGCTACTTAGGTGTCTGAGGC

>2127

CCTGCTATTCTGTTCCCTGCCAGGATATTCTGTGGATGGTTAGGGGAGGGGTCTTACCT  
CAGCTAACGAGGTGCATTTTCTGTGGGGTGAGGCCATTCTTGTCACTTAGGTGTCTGAG  
GCCTGATGGTGTGGGAATGT

>2128

CTGCCAGGATATTCTGTGGATGGTTAGGGGAGGGGTCTTACCTCAGCTAACGAGGTGC  
ATTTTCTGTGGGGTGAGGCCATTCTTGTCACTTAGGTGTCTGAGGCCTGATGGTGTGG  
GGAATGTCCTGGTTCTATTCCCA

>2129

TGTGGATGGTTAGGGGAGGGGTCTTACCTCAGCTAACGAGGTGCATTTTCTGTGGGGT  
GAGGCCATTCTTGTCACTTAGGTGTCTGAGGCCTGATGGTGTGGGAATGTCCTGGTT  
CTATTCCAGGGCTGTAACGTGG

>2130

TTAGGGGAGGGGTCTTACCTCAGCTAACGAGGTGCATTTTCTGTGGGGTGAGGCCATT  
CTTGTCACTTAGGTGTCTGAGGCCTGATGGTGTGGGAATGTCCTGGTTCTATTCCCA  
GGGCTGTAACGTGGGGGAAGGAT

>2131

CCTCAGCTAACGAGGTGCATTTTCTGTGGGGTGAGGCCATTCTTGTCACTTAGGTGTCT  
GAGGCCTGATGGTGTGGGAATGTCCTGGTTCTATTCCAGGGCTGTAACGTGGGGG  
AAGGATGGAGGAAGACAGAATGG

>2132

ATTTTCTGTGGGGTGAGGCCATTCTTGTCACTTAGGTGTCTGAGGCCTGATGGTGTGG  
GGAATGTCCTGGTTCTATTCCAGGGCTGTAACGTGGGGGAAGGATGGAGGAAGACA  
GAATGGCCTCTGGAACCTTTGGAT

>2133

GCCATTCTTGTCACTTAGGTGTCTGAGGCCTGATGGTGTGGGAATGTCCTGGTTCTA  
TCCCAGGGCTGTAACGTGGGGGAAGGATGGAGGAAGACAGAATGGCCTCTGGAAC  
TTTGGATCTTTCTGAGTTGAGGCC

>2134

TCTTGTCACTTAGGTGTCTGAGGCCTGATGGTGTGGGAATGTCCTGGTTCTATTCCC  
AGGGCTGTAACGTGGGGGAAGGATGGAGGAAGACAGAATGGCCTCTGGAACCTTTGG  
ATCTTTCTGAGTTGAGGCCTTGTCT

>2135

CCCAGGGCTGTAACGTGGGGGAAGGATGGAGGAAGACAGAATGGCCTCTGGAACCTT  
TGATCTTTCTGAGTTGAGGCCTGTCTGGCCAACTCCGGGAGGCTGCTGGCATGGCA  
AGCAGGGTAGGGATGCCTGGCCTAG

>2136

AACGTGGGGGAAGGATGGAGGAAGACAGAATGGCCTCTGGAACCTTTGGATCTTTCT

GAGTTGAGGCCTTGTCTGGCCAACTCCGGGAGGCTGCTGGCATGGCAAGCAGGGTAG  
GGATGCCTGGCCTAGCCAGGGGAGCT

>2137

AACTTTTGGATCTTTCTGAGTTGAGGCCTTGTCTGGCCAACTCCGGGAGGCTGCTGGC  
ATGGCAAGCAGGGTAGGGATGCCTGGCCTAGCCAGGGGAGCTCCCTCTCTCCCCTCTG  
CTGCCCTCTTTCCACCCCATCA

>2138

TGCCTGGCCTAGCCAGGGGAGCTCCCTCTCTCCCCTCTGCTGCCCTCTTTCCACCCCC  
ATCATAAACACGTGTGGACTTTCTGGTGGTGAGAAGATGGTTTTGGAGGGCTGGGCTG  
AGGTCTAGGCAGGCAAGAGCTTC

>2139

CCTGGCCTAGCCAGGGGAGCTCCCTCTCTCCCCTCTGCTGCCCTCTTTCCACCCCAT  
CATAAACACGTGTGGACTTTCTGGTGGTGAGAAGATGGTTTTGGAGGGCTGGGCTGAG  
GTCTAGGCAGGCAAGAGCTCCA

>2140

GGAGCTCCCTCTCTCCCCTCTGCTGCCCTCTTTCCACCCCATCATAAACACGTGTGG  
ACTTTCTGGTGGTGAGAAGATGGTTTTGGAGGGCTGGGCTGAGGTCTAGGCAGGCAA  
GAGCTTCCAAATGTGTGGCTTTGA

>2141

TTCCACCCCATCATAAACACGTGTGGACTTTCTGGTGGTGAGAAGATGGTTTTGGAG  
GGCTGGGCTGAGGTCTAGGCAGGCAAGAGCTTCCAAATGTGTGGCTTTGATTCTCAGC  
CTTTTCATCCCTCAATCCTGGGAG

>2142

GACTTTCTGGTGGTGAGAAGATGGTTTTGGAGGGCTGGGCTGAGGTCTAGGCAGGCA  
AGAGCTTCCAAATGTGTGGCTTTGATTCTCAGCCTTTTCATCCCTCAATCCTGGGAGAC  
TCATTTTAAAACCTAAAAAAGGAC

>2143

CTTTTCATCCCTCAATCCTGGGAGACTCATTTTAAAACCTAAAAAAGGACTTCATTCTAT  
TGGATGCTATGTGGGAGGCTGGGCTGTTGTAGAGAGGCCTGAAACCCACTTCAGT  
TTCCTGGACAGGCTGGGAGTGT

>2144

TGGGAGACTCATTTTAAAACCTAAAAAAGGACTTCATTCTATTGGATGCTATGTGGGCA  
GGCCCTGGGCTGTTGTAGAGAGGCCTGAAACCCACTTCAGTTTCCTGGACAGGCTGGG  
AGTGTGTACCCATGGGTTCCCTG

>2145

GAGACTCATTTTAAAACCTAAAAAAGGACTTCATTCTATTGGATGCTATGTGGGAGGC  
CCTGGGCTGTTGTAGAGAGGCCTGAAACCCACTTCAGTTTCCTGGACAGGCTGGGAGT  
GTGTACCCATGGGTTCCCTGCTG

>2146

GGACTTCATTCTATTGGATGCTATGTGGGAGGCCTGGGCTGTTGTAGAGAGGCCTGA  
AACCCACTTCAGTTTCCTGGACAGGCTGGGAGTGTGTACCCATGGGTTCCCTGCTGCC  
CTATTCCTGGAAGACACTAATAT

>2147

CTATGTGGGAGGCCTGGGCTGTTGTAGAGAGGCCTGAAACCCACTTCAGTTTCCTG  
GACAGGCTGGGAGTGTGTACCCATGGGTTCCCTGCTGCCCTATTCTGGAAGACACTA  
ATATCCCTCCCAAACCTCTGGTTG

>2148

ATGTGGGCAGGCCCTGGGCTGTTGTAGAGAGGCCTGAAACCCACTTCAGTTTCCTGGA  
CAGGCTGGGAGTGTGTACCCATGGGTTCCCTGCTGCCCTATTCCTGGAAGACACTAATA  
TCCCTCCCAAACCTCTTGTTGGT

>2149

CCTGGGCTGTTGTAGAGAGGCCTGAAACCCACTTCAGTTTCCTGGACAGGCTGGGAGT  
GTGTACCCATGGGTTCCCTGCTGCCCTATTCCTGGAAGACACTAATATCCCTCCCAAAC  
TCTTGTTGGTTTCTGCTTTTTT

>2150

GGGAGTGTGTACCCATGGGTTCCCTGCTGCCCTATTCCTGGAAGACACTAATATCCCTC  
CCAAACTCTTGTTGGTTTCTGCTTTTTTCTGTAGCATTTTGTCTTTGTGGGAAATTTT  
AAGAAACATATGTATGGCTTT

>2151

GTGTGTACCCATGGGTTCCCTGCTGCCCTATTCCTGGAAGACACTAATATCCCTCCCAA  
ACTCTTGTTGGTTTCTGCTTTTTTCTGTAGCATTTTGTCTTTGTGGGAAATTTAAGA  
AACATATGTATGGCTTTTTGG

>2152

CCCTGCTGCCCTATTCCTGGAAGACACTAATATCCCTCCCAAACCTCTTGTTGGTTTCTG  
CTTTTTTCTGTAGCATTTTGTCTTTGTGGGAAATTTAAGAAACATATGTATGGCTTTTT  
GGTTTCCACTTATTTATTT

>2153

CAAACCTTGTTGGTTTCTGCTTTTTTCTGTAGCATTTTGTCTTTGTGGGAAATTTTA  
AGAAACATATGTATGGCTTTTTGGTTTCCACTTATTTATTTCCCTCTGAGTTTCAGATT  
TCATCCTTCTCCACCCCTT

>2154

GGTTTCTGCTTTTTTCTGTAGCATTTTGTCTTTGTGGGAAATTTAAGAAACATATGTAT  
GGCTTTTTGGTTTCCACTTATTTATTTCCCTCTGAGTTTCAGATTTTCATCCTTCTCCAC  
CCCTTCCCCCTGCCCTAA

>2155

GTCTTTGTGGGAAATTTAAGAAACATATGTATGGCTTTTTGGTTTCCACTTATTTATTT  
CCCCTCTGAGTTTCAGATTTTCATCCTTCTCCACCCCTTCCCCCTGCCCTAAGGTGGGGC  
TAGTGCAAATCGCAGTGTGT

>2156

TTTCCACTTATTTATTTCCCTCTGAGTTTCAGATTTTCATCCTTCTCCACCCCTTCCCC  
TGCCCTAAGGTGGGGCTAGTGCAAATCGCAGTGTGTGTAGTGGGATGGTTAAAGAG  
CCGTACATCCTCACACCTGGT

>2157

ATTTATTTCCCTCTGAGTTTCAGATTTTCATCCTTCTCCACCCCTTCCCCCTGCCCTAA  
GGTGGGGCTAGTGCAAATCGCAGTGTGTGTAGTGGGATGGTTAAAGAGCCGTACAT  
CCTCACACCTGGTGACGCAGAC

>2158

GTTTCAGATTTTCATCCTTCTCCACCCCTTCCCCCTGCCCTAAGGTGGGGCTAGTGCAA  
TCGCAGTGTGTGTAGTGGGATGGTTAAAGAGCCGTACATCCTCACACCTGGTGACG  
CAGACTAAGGCAATTAACCTTCT

>2159

TTCAGATTTTCATCCTTCTCCACCCCTTCCCCCTGCCCTAAGGTGGGGCTAGTGCAAATC



GCAGTGTGTGTAGTGGGATGGTTAAAGAGCCGTACATCCTCACACCTGGTGACGCA  
GACTAAGGCAATTAACCTTCTTT

>2160

AGATTTTCATCCTTCTCCACCCCTTCCCCTGCCCTAAGGTGGGGCTAGTGCAAATCGCA  
GTGTGTGTGTAGTGGGATGGTTAAAGAGCCGTACATCCTCACACCTGGTGACGCAGAC  
TAAGGCAATTAACCTTCTTTAGT

>2161

TCCTTCTCCACCCCTTCCCCTGCCCTAAGGTGGGGCTAGTGCAAATCGCAGTGTGTGT  
GTAGTGGGATGGTTAAAGAGCCGTACATCCTCACACCTGGTGACGCAGACTAAGGCAA  
TTAACCTTCTTTAGTAAAGACCC

>2162

CCCTTCCCCTGCCCTAAGGTGGGGCTAGTGCAAATCGCAGTGTGTGTGTAGTGGGAT  
GGTTAAAGAGCCGTACATCCTCACACCTGGTGACGCAGACTAAGGCAATTAACCTTCT  
TTAGTAAAGACCCCTTTCAGCTGGG

>2163

TAGTGGGATGGTTAAAGAGCCGTACATCCTCACACCTGGTGACGCAGACTAAGGCAAT  
TAACCTTCTTTAGTAAAGACCCCTTTCAGCTGGGTGCGGTGGGAGGCACTTCGGGAGGC  
CGAGGTGGAAGGATTGCTTGAGCC

>2164

CGTACATCCTCACACCTGGTGACGCAGACTAAGGCAATTAACCTTCTTTAGTAAAGACC  
CTTTCAGCTGGGTGCGGTGGGAGGCACTTCGGGAGGCCGAGGTGGAAGGATTGCTTG  
AGCCCTGGAGTTGGAGACCAGCTT

>2165

AAGGCAATTAACCTTCTTTAGTAAAGACCCCTTTCAGCTGGGTGCGGTGGGAGGCACTT  
CGGGAGGCCGAGGTGGAAGGATTGCTTGAGCCCTGGAGTTGGAGACCAGCTTGGGCA  
GCATGGTGAAACCACCTCTCTAAAA

>2166

GACCCTTTCAGCTGGGTGCGGTGGGAGGCACTTCGGGAGGCCGAGGTGGAAGGATTG  
CTTGAGCCCTGGAGTTGGAGACCAGCTTGGGCAGCATGGTGAAACCACCTCTCTAAAA  
AAATATAAAAATTAACGGGACGTTG

>2167

AGGCACTTCGGGAGGCCGAGGTGGAAGGATTGCTTGAGCCCTGGAGTTGGAGACCAG  
CTTGGGCAGCATGGTGAAACCACCTCTCTAAAAAATATAAAAATTAACGGGACGTTG  
TGGCATGCACCTATAGTCCCAGCTA

>2168

TGGAGTTGGAGACCAGCTTGGGCAGCATGGTGAAACCACCTCTCTAAAAAATATAAA  
AATTAACGGGACGTTGTGGCATGCACCTATAGTCCCAGCTACTTGGGAGGCTGGGGCG  
CGAGAAGTGCTTGAACCTGAGAGA

>2169

AGTTGGAGACCAGCTTGGGCAGCATGGTGAAACCACCTCTCTAAAAAATATAAAAAT  
TAACGGGACGTTGTGGCATGCACCTATAGTCCCAGCTACTTGGGAGGCTGGGGCGCGA  
GAAGTGCTTGAACCTGAGAGATGG

>2170

TATAAAAATTAACGGGACGTTGTGGCATGCACCTATAGTCCCAGCTACTTGGGAGGCTG  
GGGCGCGAGAAGTGCTTGAACCTGAGAGATGGAGACTGCGGTGAGGCGAGATTGCAC  
CACTGCACTTCAGCTAGGTGACAG

>2171

CACCTATAGTCCCAGCTACTTGGGAGGCTGGGGCGCGAGAAGTGCTTGAACCTGAGAG  
ATGGAGACTGCGGTGAGGCGAGATTGCACCACTGCACTTCAGCTAGGTGACAGAGTG  
GGACCCTGTCTCAAAACAAAACAAA

>2172

GCGAGAAGTGCTTGAACCTGAGAGATGGAGACTGCGGTGAGGCGAGATTGCACCACT  
GCACTTCAGCTAGGTGACAGAGTGGGACCCTGTCTCAAAACAAAACAAAACAACAAC  
AAAAAAAGCATGTTTTCTGTCTTTC

>2173

TGCTTGAACCTGAGAGATGGAGACTGCGGTGAGGCGAGATTGCACCACTGCACTTCA  
GCTAGGTGACAGAGTGGGACCCTGTCTCAAAACAAAACAAAACAACAACAAAAA  
GCATGTTTTCTGTCTTTCCTTCTC

>2174

CTGCACTTCAGCTAGGTGACAGAGTGGGACCCTGTCTCAAAACAAAACAAAACAACA  
ACAAAAAAGCATGTTTTCTGTCTTTCCTTCTCCTCCACCCCCTGGCATGAACT  
CTCAACTCTTAGCCTGTGGATGTC

>2175

CAGCTAGGTGACAGAGTGGGACCCTGTCTCAAAACAAAACAAAACAACAACAAAA  
AAGCATGTTTTCTGTCTTTCCTTCTCCTCCACCCCCTGGCATGAACTCTCAACTC  
TTAGCCTGTGGATGTCCGTTTCTA

>2176

AAAAAGCATGTTTTCTGTCTTTCCTTCTCCTCCACCCCCTGGCATGAACTCTCA  
ACTCTTAGCCTGTGGATGTCCGTTTCTATAAATGCTGGTGCTCGGTGGTCACCGTAGAC  
GTCCGAGCAGCCCCTGGGGCTT

>2177

CATGTTTTCTGTCTTTCCTTCTCCTCCACCCCCTGGCATGAACTCTCAACTCTTA  
GCCTGTGGATGTCCGTTTCTATAAATGCTGGTGCTCGGTGGTCACCGTAGACGTCGAG  
CAGCCCCTGGGGCTTTGGCTT

>2178

CCTCCACCCCCTGGCATGAACTCTCAACTCTTAGCCTGTGGATGTCCGTTTCTATAAATG  
CTGGTGCTCGGTGGTCACCGTAGACGTCGAGCAGCCCCTGGGGCTTTGGCTTGTGTT  
TTCTGTACTTGTGAGGGTGG

>2179

CCACCCCCTGGCATGAACTCTCAACTCTTAGCCTGTGGATGTCCGTTTCTATAAATGCT  
GGTGCTCGGTGGTCACCGTAGACGTCGAGCAGCCCCTGGGGCTTTGGCTTGTGTTTT  
CTCTGTACTTGTGAGGGTGGTTG

>2180

CCTGGCATGAACTCTCAACTCTTAGCCTGTGGATGTCCGTTTCTATAAATGCTGGTGCTC  
GGTGGTCACCGTAGACGTCGAGCAGCCCCTGGGGCTTTGGCTTGTGTTTTCTCTGTA  
CTTGTGAGGGTGGTTGCCACTT

>2181

ATGAACTCTCAACTCTTAGCCTGTGGATGTCCGTTTCTATAAATGCTGGTGCTCGGTGG  
TCACCGTAGACGTCGAGCAGCCCCTGGGGCTTTGGCTTGTGTTTTCTCTGTACTTGTG  
AGGGTGGTTGCCACTTCTGGCC

>2182

GTCCGTTTCTATAAATGCTGGTGCTCGGTGGTCACCGTAGACGTCGAGCAGCCCCTGG

GGCTTTGGCTTGTGTTTTCTCTGTACTTGTGAGGGTGGTTGCCACTTCTGGCCTTCTTT  
GTGCTTTCTTTTTCTTTCTTT

>2183

CTCGGTGGTCACCGTAGACGTCCGAGCAGCCCCTGGGGCTTTGGCTTGTGTTTTCTCT  
GTACTTGTGAGGGTGGTTGCCACTTCTGGCCTTCTTTGTGCTTTCTTTTTCTTTCTTTT  
CCCAATCTTTTGTTCCTCCCTC

>2184

GGTGGTCACCGTAGACGTCCGAGCAGCCCCTGGGGCTTTGGCTTGTGTTTTCTCTGTA  
CTTGTGAGGGTGGTTGCCACTTCTGGCCTTCTTTGTGCTTTCTTTTTCTTTCTTTCC  
AATCTTTTGTTCCTCCCTCCCT

>2185

GCAGCCCCTGGGGCTTTGGCTTGTGTTTTCTCTGTACTTGTGAGGGTGGTTGCCACTTC  
TGGCCTTCTTTGTGCTTTCTTTTTCTTTCTTTCCCAATCTTTTGTTCCTCCCTCCCTCC  
CTCCCTCCCTTCTCCCTTC

>2186

TACTTGTGAGGGTGGTTGCCACTTCTGGCCTTCTTTGTGCTTTCTTTTTCTTTCTTTCC  
CCAATCTTTTGTTCCTCCCTCCCTCCCTCCCTCCCTTCTCCCTTCTTCTGCTTTT  
CTGTTTAAAGTATATGGCT

>2187

CCTTTCCCAATCTTTTGTTCCTCCCTCCCTCCCTCCCTCCCTTCTCCCTTCTTCTTCTC  
TGCTTTCTGTTTAAAGTATATGGCTGCACCTAGCATGACACAGTTCCTATTTATTCCTC  
AGACTTGCTGGGACAGTCT

>2188

CCAATCTTTTGTTCCTCCCTCCCTCCCTCCCTCCCTTCTCCCTTCTTCTGCTTTT  
CTGTTTAAAGTATATGGCTGCACCTAGCATGACACAGTTCCTATTTATTCCTCAGACTTG  
CTGGGACAGTCTCCTCTGT

>2189

TCCCTCCCTTCTCCCTTCTTCTTCTGCTTCTGTTTAAAGTATATGGCTGCACCTA  
GCATGACACAGTTCCTATTTATTCCTCAGACTTGCTGGGACAGTCTCCTCTGTATGCGG  
CGACTGAGGGTGGGTTCCAGT

>2190

TCCTGTTTAAAGTATATGGCTGCACCTAGCATGACACAGTTCCTATTTATTCCTCAGACT  
TGCTGGGACAGTCTCCTCTGTATGCGGCGACTGAGGGTGGGTTCCAGTGCCCCAGCCC  
ACTCCCCTTCCCCTTGTTTTTG

>2191

AAGTATATGGCTGCACCTAGCATGACACAGTTCCTATTTATTCCTCAGACTTGCTGGGAC  
AGTCTCCTCTGTATGCGGCGACTGAGGGTGGGTTCCAGTGCCCCAGCCCCTCCCTT  
CCCCTTGTTTTGTCCACTTGG

>2192

TAGCATGACACAGTTCCTATTTATTCCTCAGACTTGCTGGGACAGTCTCCTCTGTATGCG  
GCGACTGAGGGTGGGTTCCAGTGCCCCAGCCCCTCCCCTTGTTTTGTCCA  
CTTGGCTGGACAAAGAGAACAA

>2193

TGGGACAGTCTCCTCTGTATGCGGCGACTGAGGGTGGGTTCCAGTGCCCCAGCCCCT  
CCCCTTCCCCTTGTTTTGTCCACTTGGCTGGACAAAGAGAACAAAACCAATGGCCT  
CCCCTCCCCTCTCCTAAACCGGT

>2194

AGTCTCCTCTGTATGCGGCGACTGAGGGTGGGTTCCAGTGCCCCAGCCCACTCCCCTT  
CCCCTTGTTTTGTCCACTTGGCTGGACAAAGAGAACAAAACCAAATGGCCTCCCCTC  
CCCCTCTCCTAAACCGGTCAAGCA

>2195

TTGTTTTGTCCACTTGGCTGGACAAAGAGAACAAAACCAAATGGCCTCCCCTCCCC  
TCTCCTAAACCGGTCAAGCAGTGGTATTCTGGGATGATTTCCCTGCAACCATTAAAC  
AAGTGCTTTGATGCTTACGAGTC

>2196

GTCCACTTGGCTGGACAAAGAGAACAAAACCAAATGGCCTCCCCTCCCCCTCCTAA  
ACCGGTCAAGCAGTGGTATTCTGGGATGATTTCCCTGCAACCATTAAACAAGTGCTT  
TGATGCTTACGAGTCATTGGAAT

>2197

CCCTCCCCTCTCCTAAACCGGTCAAGCAGTGGTATTCTGGGATGATTTCCCTGCAAC  
CATTTAAACAAGTGCTTTGATGCTTACGAGTCATTGGAATGACCAGGCCTGTGCGCCCC  
TTCTCACTGACACCCTTAGACC

>2198

CCGGTCAAGCAGTGGTATTCTGGGATGATTTCCCTGCAACCATTAAACAAGTGCTTT  
GATGCTTACGAGTCATTGGAATGACCAGGCCTGTGCGCCCCTTCTCACTGACACCCTTA  
GACCAGGCTGGGCCTCACCTT

>2199

GGGATGATTTCCCTGCAACCATTAAACAAGTGCTTTGATGCTTACGAGTCATTGGAA  
TGACCAGGCCTGTGCGCCCCTTCTCACTGACACCCTTAGACCAGGCTGGGCCTCACCC  
TTTTGTCTTGCTGCCCCCTCGGTG

>2200

CATTGGAATGACCAGGCCTGTGCGCCCCTTCTCACTGACACCCTTAGACCAGGCTGGG  
CCTCACCTTTTGTCTTGCTGCCCCTCGGTGCCAGTGGGCGTGGGCAGTAGGACTGA  
GCAGAGGGGCCGAGGCTGTGCTGG

>2201

CCTGTGCGCCCCTTCTCACTGACACCCTTAGACCAGGCTGGGCCTCACCTTTTGTCTT  
GCTGCCCCTCGGTGCCAGTGGGCGTGGGCAGTAGGACTGAGCAGAGGGGCCGAGGC  
TGTGCTGGCCGGCAGCTCTGTTAC

>2202

TCTCACTGACACCCTTAGACCAGGCTGGGCCTCACCTTTTGTCTTGCTGCCCCTCGGT  
GCCAGTGGGCGTGGGCAGTAGGACTGAGCAGAGGGGCCGAGGCTGTGCTGGCCGGC  
AGCTCTGTTACAGTAGAGTGGAAG

>2203

GACACCCTTAGACCAGGCTGGGCCTCACCTTTTGTCTTGCTGCCCCTCGGTGCCAG  
TGGGCGTGGGCAGTAGGACTGAGCAGAGGGGCCGAGGCTGTGCTGGCCGGCAGCTCT  
GTTACAGTAGAGTGGAAGGAGGTCC

>2204

CCCTTTTGTCTTGCTGCCCCTCGGTGCCAGTGGGCGTGGGCAGTAGGACTGAGCAGA  
GGGGCCGAGGCTGTGCTGGCCGGCAGCTCTGTTACAGTAGAGTGGAAGGAGGTCCCG  
GCCAGAGGGGCAGGTCAAACAGGCC

>2205

CCTCGGTGCCAGTGGGCGTGGGCAGTAGGACTGAGCAGAGGGGCCGAGGCTGTGCT

GGCCGGCAGCTCTGTTACAGTAGAGTGGAAGGAGGTCCCGGCCAGAGGGGCAGGTCA  
AACAGGCCTCTTTTATTACAGTGCT

>2206

AGTGGGCGTGGGCAGTAGGACTGAGCAGAGGGGCCGAGGCTGTGCTGGCCGGCAGCT  
CTGTTACAGTAGAGTGGAAGGAGGTCCCGGCCAGAGGGGCAGGTCAAACAGGCCTCT  
TTTATTTACAGTGCTCTCTTTCACGG

>2207

GGCAGTAGGACTGAGCAGAGGGGCCGAGGCTGTGCTGGCCGGCAGCTCTGTTACAGT  
AGAGTGGAAGGAGGTCCCGGCCAGAGGGGCAGGTCAAACAGGCCTCTTTTATTACA  
GTGCTCTCTTTCACGGCCTCACTGAA

>2208

GGGGCCGAGGCTGTGCTGGCCGGCAGCTCTGTTACAGTAGAGTGGAAGGAGGTCCCG  
GCCAGAGGGGCAGGTCAAACAGGCCTCTTTTATTACAGTGCTCTCTTTCACGGCCTC  
ACTGAAACAGGAGACCCGAGAGGCT

>2209

GCTCTGTTACAGTAGAGTGGAAGGAGGTCCCGGCCAGAGGGGCAGGTCAAACAGGCC  
TCTTTTATTACAGTGCTCTCTTTCACGGCCTCACTGAAACAGGAGACCCGAGAGGCTC  
CGGTGAAAGGGCACTGTGTTTGTG

>2210

AAACAGGCCTCTTTTATTACAGTGCTCTCTTTCACGGCCTCACTGAAACAGGAGACC  
CGAGAGGCTCCGGTGAAAGGGCACTGTGTTTGTGCATTACAGGCCTCCAGGGCTGGCT  
ACAAAGGTGGGGGCACCCGAGCA

>2211

ATTTACAGTGCTCTCTTTCACGGCCTCACTGAAACAGGAGACCCGAGAGGCTCCGGTG  
AAAGGGCACTGTGTTTGTGCATTACAGGCCTCCAGGGCTGGCTACAAAGGTGGGGGC  
ACCCGAGCACTGAAGGGGCTTTTT

>2212

ACAGTGCTCTCTTTCACGGCCTCACTGAAACAGGAGACCCGAGAGGCTCCGGTGAAA  
GGGCACTGTGTTTGTGCATTACAGGCCTCCAGGGCTGGCTACAAAGGTGGGGGCACCC  
GGAGCACTGAAGGGGCTTTTTGTCA

>2213

GAGACCCGAGAGGCTCCGGTGAAAGGGCACTGTGTTTGTGCATTACAGGCCTCCAGG  
GCTGGCTACAAAGGTGGGGGCACCCGAGCACTGAAGGGGCTTTTTGTGCATTGGCAG  
TTTGGCTTAGGGGAGAAGCGAGGGAG

>2214

GTTTGTGCATTACAGGCCTCCAGGGCTGGCTACAAAGGTGGGGGCACCCGAGCACTG  
AAGGGGCTTTTTGTGCATTGGCAGTTTGGCTTAGGGGAGAAGCGAGGGAGAGCCAGTG  
TGGGAGCCGCCTCTAGGATTGTGAG

>2215

TCAGGCCTCCAGGGCTGGCTACAAAGGTGGGGGCACCCGAGCACTGAAGGGGCTT  
TTTGTGCATTGGCAGTTTGGCTTAGGGGAGAAGCGAGGGAGAGCCAGTGTGGGAGCCG  
CCTCTAGGATTGTGAGCAAGTGCCTG

>2216

GGCACCCGAGCACTGAAGGGGCTTTTTGTGCATTGGCAGTTTGGCTTAGGGGAGAAGC  
GAGGGAGAGCCAGTGTGGGAGCCGCCTCTAGGATTGTGAGCAAGTGCCTGTTTAGAC  
AGCTCCACGCTGCTCCTTAAAACCT

>2217

TTTTTGTCATTGGCAGTTTGGCTTAGGGGAGAAGCGAGGGAGAGCCAGTGTGGGAGC  
CGCCTCTAGGATTGTGAGCAAGTGCCTGTTTAGACAGCTCCACGCTGCTCCTAAAAAC  
CTATTTTGTGGTCTGGGGTTGGGGC

>2218

ATTGGCAGTTTGGCTTAGGGGAGAAGCGAGGGAGAGCCAGTGTGGGAGCCGCCTCTA  
GGATTGTGAGCAAGTGCCTGTTTAGACAGCTCCACGCTGCTCCTAAAAACCTATTTTGT  
GGTCTGGGGTTGGGGCGGGGGCAC

>2219

GGAGCCGCCTCTAGGATTGTGAGCAAGTGCCTGTTTAGACAGCTCCACGCTGCTCCT  
AAAACCTATTTTGTGGTCTGGGGTTGGGGCGGGGGCACACTGCCTCGATCCTCTTGT  
GTGTGGAGCAAAGTGATTCCTCTC

>2220

GCCGCCTCTAGGATTGTGAGCAAGTGCCTGTTTAGACAGCTCCACGCTGCTCCTAAA  
ACCTATTTTGTGGTCTGGGGTTGGGGCGGGGGCACACTGCCTCGATCCTCTTGTGTGT  
GGAGCAAAGTGATTCCTCTCTC

>2221

TCCACGCTGCTCCTAAAAACCTATTTTGTGGTCTGGGGTTGGGGCGGGGGCACACTGC  
CTCGATCCTCTTGTGTGTGGAGCAAAGTGATTCCTCTCTTCTTGTGTTCTCCAGATGG  
TTCCGTTGCTCCTCACATCCATTG

>2222

AAAACCTATTTTGTGGTCTGGGGTTGGGGCGGGGGCACACTGCCTCGATCCTCTTGT  
GTGTGGAGCAAAGTGATTCCTCTCTTCTTGTGTTCTCCAGATGGTCCGTTGCTCCTCAC  
ATCCATTGTGGTTGAGGATACAG

>2223

CTGGGGTTGGGGCGGGGGCACACTGCCTCGATCCTCTTGTGTGTGGAGCAAAGTGAT  
TCCTCTCTTCTTGTGTTCTCCAGATGGTCCGTTGCTCCTCACATCCATTGTGGTTGAGGA  
TACAGTGCAGAGAAGACCCCGC

>2224

GGGGCACACTGCCTCGATCCTCTTGTGTGTGGAGCAAAGTGATTCCTCTCTTCTTGTG  
TTCTCCAGATGGTCCGTTGCTCCTCACATCCATTGTGGTTGAGGATACAGTGCAGAGAA  
GACCCCGCTGCTCTGCTCCC

>2225

TGTTGTGTGGAGCAAAGTGATTCCTCTCTTCTTGTGTTCTCCAGATGGTCCGTTGTCC  
TCACATCCATTGTGGTTGAGGATACAGTGCAGAGAAGACCCCGCTGCTCCTCTGCTCCC  
CCTCCTTTTCTCTCAAAGAGAA

>2226

TGTGTGGAGCAAAGTGATTCCTCTCTTCTTGTGTTCTCCAGATGGTCCGTTGCTCCTCA  
CATCCATTGTGGTTGAGGATACAGTGCAGAGAAGACCCCGCTGCTCCTCTGCTCCCCCTC  
CTTTCTCTCAAAGAGAAGTT

>2227

AGTGATTCCTCTCTTCTTGTGTTCTCCAGATGGTCCGTTGCTCCTCACATCCATTGTGGT  
TGAGGATACAGTGCAGAGAAGACCCCGCTGCTCCTCTGCTCCCCCTCTTTCTCTCAA  
AGAGAAGTTTCAGGGACAGCA

>2228

TGTTCTCCAGATGGTCCGTTGCTCCTCACATCCATTGTGGTTGAGGATACAGTGCAGAG

AAGACCCCGCTGCCTCTGCTCCCCCTCCTTTTCTCTCAAAGAGAAGTTTCAGGGAC  
AGCAATAGACTTCTGTGGGGCCT

>2229

GTGGTTGAGGATACAGTGCAGAGAAGACCCCGCTGCCTCTGCTCCCCCTCCTTTTCTC  
TCAAAGAGAAGTTTCAGGGACAGCAATAGACTTCTGTGGGGCCTTTGTTCTTGTAG  
CTTTCATTTTTCAATTCTTCTC

>2230

GACCCCGCTGCCTCTGCTCCCCCTCCTTTTCTCTCAAAGAGAAGTTTCAGGGACAG  
CAATAGACTTCTGTGGGGCCTTTGTTCTTGTAGCTTTCATTTTTCAATTCTTCTTCTCC  
CTGTATTATCTTGTAGGCCTT

>2231

TCCCCCTCCTTTTCTCTCAAAGAGAAGTTTCAGGGACAGCAATAGACTTCTGTGGGG  
CCTTTGTTCTTGTAGCTTTCATTTTTCAATTCTTCTTCTCCCTGTATTATCTTGTAGGC  
CTTAGTTTGTGCATCTCTAAA

>2232

AGGGACAGCAATAGACTTCTGTGGGGCCTTTGTTCTTGTAGCTTTCATTTTTCAATTCT  
TCTTCTCCCTGTATTATCTTGTAGGCCTTAGTTTGTGCATCTCTAAAATGGGCTGGGAG  
GTGCTAGCCCATACCTAATA

>2233

TGGGGCCTTTGTTCTTGTAGCTTTCATTTTTCAATTCTTCTTCTCCCTGTATTATCTTGC  
TAGGCCTTAGTTTGTGCATCTCTAAAATGGGCTGGGAGGTGCTAGCCCATACCTAATA  
TAGGGCCGTCGTAAGGCTT

>2234

TTTCAATTCTTCTTCTCCCTGTATTATCTTGTAGGCCTTAGTTTGTGCATCTCTAAAATG  
GGCTGGGAGGTGCTAGCCCATACCTAATATATAGGGCCGTCGTAAGGCTTAGGTCCCAT  
AACTCATGGGGTTGGCTTGC

>2235

TGCTAGGCCTTAGTTTGTGCATCTCTAAAATGGGCTGGGAGGTGCTAGCCCATACCTAA  
TATATAGGGCCGTCGTAAGGCTTAGGTCCCATAACTCATGGGGTTGGCTTGCACAGGGC  
TCTCTCCTTTCAGACTGGTCAG

>2236

GGGCTGGGAGGTGCTAGCCCATACCTAATATATAGGGCCGTCGTAAGGCTTAGGTCCCA  
TAACTCATGGGGTTGGCTTGCACAGGGCTCTCTCCTTTCAGACTGGTCAGGCCATGGTC  
CTTTTATGAGTCTGAAGAGCCA

>2237

GGGCCGTCGTAAGGCTTAGGTCCCATAACTCATGGGGTTGGCTTGCACAGGGCTCTCT  
CCTTTCAGACTGGTCAGGCCATGGTCCTTTTATGAGTCTGAAGAGCCAAAATGAAGAC  
CTCACTTCTAGTATCCCAATCT

>2238

AGGCTTAGGTCCCATAACTCATGGGGTTGGCTTGCACAGGGCTCTCTCCTTTCAGACTG  
GTCAGGCCATGGTCCTTTTATGAGTCTGAAGAGCCAAAATGAAGACCTCACTTCTAGT  
ATCCCAATCTTCTCCACCT

>2239

CATAACTCATGGGGTTGGCTTGCACAGGGCTCTCTCCTTTCAGACTGGTCAGGCCATGG  
TCCTTTTATGAGTCTGAAGAGCCAAAATGAAGACCTCACTTCTAGTATCCCAATCTT  
CCTCCACCTTCTCCCTGGCTCT

>2240

TCCTTTCAGACTGGTCAGGCCATGGTCCTTTTATGAGTCTGAAGAGCCAAAATGAAGA  
CCTCACTTTCTAGTATCCCCAATCTTCTCCACCTTTCCTGGCTCTTGAGGGTTCTTT  
GGGCATGTTCCCCTCTGGTCTC

>2241

AAGAGCCAAAATGAAGACCTCACTTTCTAGTATCCCCAATCTTCTCCACCTTTCCT  
GGCTCTTGAGGGTTCTTTGGGCATGTTCCCCTCTGGTCTCCATTATTATATAGGGAAGAG  
AAATTTTCCAGAAGAATATTT

>2242

AAGACCTCACTTTCTAGTATCCCCAATCTTCTCCACCTTTCCTGGCTCTTGAGGGTT  
CTTTGGGCATGTTCCCCTCTGGTCTCCATTATTATATAGGGAAGAGAAATTTTCCAGAAG  
AATATTTGAAGGATTAAGT

>2243

ATGTTCCCCTCTGGTCTCCATTATTATATAGGGAAGAGAAATTTTCCAGAAGAATATTTG  
AAGGATTAAGTTTGAGGTTGTAGAATATGTGAAAACACACACACACCACACCACACC  
CCAAAATCACCTTTTAAAGAA

>2244

CCTCTGGTCTCCATTATTATATAGGGAAGAGAAATTTTCCAGAAGAATATTTGAAGGATT  
AAAGTTTGAGGTTGTAGAATATGTGAAAACACACACACACCACACCACCCCCAAAAT  
CACCTTTTAAAGAAGATTAAT

>2245

ATTATTATATAGGGAAGAGAAATTTTCCAGAAGAATATTTGAAGGATTAAGTTTGAGG  
TTGTAGAATATGTGAAAACACACACACACCACACCACACCACCCCCAAAATCACCTTTTAA  
AGAAGATTAATAAACCACCAAGT

>2246

TATGTGAAAACACACACACACCACACCACACCACCCCCAAAATCACCTTTTAAAGAAGATT  
AAAAAACCACCAAGTGCCTGTCTACATTGGTAAACTCTGGCAAGCCTCATAATGTTGA  
CTTTACTGACCTGCCTGACTTCAG

>2247

AAAACACACACACACCACACCACACCACCCCCAAAATCACCTTTTAAAGAAGATTAATAA  
ACCACCAAGTGCCTGTCTACATTGGTAAACTCTGGCAAGCCTCATAATGTTGACTTTAC  
TGACCTGCCTGACTTCAGTGGCCG

>2248

CCCTTTTAAAGAAGATTAATAAACCACCAAGTGCCTGTCTACATTGGTAAACTCTGGC  
AAGCCTCATAATGTTGACTTTACTGACCTGCCTGACTTCAGTGGCCGAGTCTACATGGG  
GTGTTAAGGCCCCACGTGTTTTT

>2249

AGTGCCTGTCTACATTGGTAAACTCTGGCAAGCCTCATAATGTTGACTTTACTGACCT  
GCCTGACTTCAGTGGCCGAGTCTACATGGGGTGTAAAGGCCCCACGTGTTTTTGCCTGT  
GCCCTTAATTGTATCTTCAGG

>2250

TCCTACATTGGTAAACTCTGGCAAGCCTCATAATGTTGACTTTACTGACCTGCCTGACT  
TCAGTGGCCGAGTCTACATGGGGTGTAAAGGCCCCACGTGTTTTTGCCTGTGCCCTTA  
ATTGTATCTTCAGGACCATATT

>2251

CTCATAATGTTGACTTTACTGACCTGCCTGACTTCAGTGGCCGAGTCTACATGGGGTGT



TAAGGCCCCACGTGTTTTGCCTGTGCCCTTAATTGTATCTTCAGGACCATATTTTCAG  
AACCAGAAATCACAGCCACAG

>2252

ACTTTACTGACCTGCCTGACTTCAGTGGCCGAGTCTACATGGGGTGTTAAGGCCCCAC  
GTGTTTTGCCTGTGCCCTTAATTGTATCTTCAGGACCATATTTTCAGAACCAGAAATC  
ACAGCCACAGTTTGGCAGTGGC

>2253

GCCTGACTTCAGTGGCCGAGTCTACATGGGGTGTTAAGGCCCCACGTGTTTTGCCTGT  
GCCCTTAATTGTATCTTCAGGACCATATTTTCAGAACCAGAAATCACAGCCACAGTTT  
GGCAGTGGCACAGAATGGTTCA

>2254

CGTGTTTTTGCCTGTGCCCTTAATTGTATCTTCAGGACCATATTTTCAGAACCAGAAAT  
CACAGCCACAGTTTGGCAGTGGCACAGAATGGTTCAATTTAGGCCTATCCAGAGAGG  
CTTGGGTTGTCTGTGAAGTTCT

>2255

TGCCTGTGCCCTTAATTGTATCTTCAGGACCATATTTTCAGAACCAGAAATCACAGCC  
ACAGTTTGGCAGTGGCACAGAATGGTTCAATTTAGGCCTATCCAGAGAGGCTTGGGT  
TGCTGTGAAGTTCTGGGTGGTC

>2256

TAATTGTATCTTCAGGACCATATTTTCAGAACCAGAAATCACAGCCACAGTTTGGCAGT  
GGCACAGAATGGTTCAATTTAGGCCTATCCAGAGAGGCTTGGGTTGTCTGTGAAGTT  
CTGGGTGGTCTGTATTGTGGAGA

>2257

AAATCACAGCCACAGTTTGGCAGTGGCACAGAATGGTTCAATTTAGGCCTATCCAGAG  
GAGGCTTGGGTTGTCTGTGAAGTTCTGGGTGGTCTGTATTGTGGAGAGGTGAACACCG  
TATTGCTGGGGGTGTGGAGGGGGG

>2258

CACAGCCACAGTTTGGCAGTGGCACAGAATGGTTCAATTTAGGCCTATCCAGAGAGG  
CTTGGGTTGTCTGTGAAGTTCTGGGTGGTCTGTATTGTGGAGAGGTGAACACCGTATTG  
CTGGGGGTGTGGAGGGGGGATGT

>2259

CCACAGTTTGGCAGTGGCACAGAATGGTTCAATTTAGGCCTATCCAGAGAGGCTTGG  
GTTGTCTGTGAAGTTCTGGGTGGTCTGTATTGTGGAGAGGTGAACACCGTATTGCTGG  
GGGTGTGGAGGGGGGATGTTGCTG

>2260

TGGCACAGAATGGTTCAATTTAGGCCTATCCAGAGAGGCTTGGGTTGTCTGTGAAGT  
TCTGGGTGGTCTGTATTGTGGAGAGGTGAACACCGTATTGCTGGGGGTGTGGAGGGGG  
GATGTTGCTGTTTCCCTGCTACAG

>2261

AGGCTTGGGTTGTCTGTGAAGTTCTGGGTGGTCTGTATTGTGGAGAGGTGAACACCGT  
ATTGCTGGGGGTGTGGAGGGGGGATGTTGCTGTTTCCCTGCTACAGAAAGGCCAGGCT  
TCCTTTTCAGCCTTTTGTCCCCG

>2262

CTGTGAAGTTCTGGGTGGTCTGTATTGTGGAGAGGTGAACACCGTATTGCTGGGGGTG  
TGGAGGGGGGATGTTGCTGTTTCCCTGCTACAGAAAGGCCAGGCTTCTTTTCAGCCT  
TTTGTCCCCGATTCCCTCTCTT

>2263

AGTTCTGGGTGGTCTGTATTGTGGAGAGGTGAACACCGTATTGCTGGGGGTGTGGAGG  
GGGGATGTTGCTGTTTCCCTGCTACAGAAAGGCCAGGCTTCCTTTTCAGCCTTTTGTTT  
CCCGATTCCCCTCTTCTCTCCA

>2264

CTGGGGGTGTGGAGGGGGATGTTGCTGTTTCCCTGCTACAGAAAGGCCAGGCTTCCT  
TTTCAGCCTTTTGTTCCCGATTCCCCTCTTCTCTCCACTACACTCAGCCCTGCTGCTG  
CTTCCAAGGGACAACCTCCCTCT

>2265

CCCCGATTCCCCTCTTCTCTCCACTACACTCAGCCCTGCTGCTGCTTCCAAGGGACAA  
CTCCCTCTTGTCTTGGCCATCTTTGAGAGAGGCGGTGAATAAACACCAAGGCAAG  
AAGAAGCAACGGGACCCCTAGAA

>2266

ACACTCAGCCCTGCTGCTGCTTCCAAGGGACAACCTCCCTCTTGTCTTGCCCATCTT  
TGAGAGAGGCGGTGAATAAACACCAAGGCAAGAAGAAGCAACGGGACCCCTAGAAG  
GAGATGAGTGTGTGGCCCAAGGATG

>2267

CCATCTTTGAGAGAGGCGGTGAATAAACACCAAGGCAAGAAGAAGCAACGGGACCCC  
TAGAAGGAGATGAGTGTGTGGCCCAAGGATGGTGGAGCATTGTCCTGAAAGGTAGAA  
CCAAGACTATAGCCTCCGAGGCTCTG

>2268

ATCTTTGAGAGAGGCGGTGAATAAACACCAAGGCAAGAAGAAGCAACGGGACCCCTA  
GAAGGAGATGAGTGTGTGGCCCAAGGATGGTGGAGCATTGTCCTGAAAGGTAGAACC  
AAGACTATAGCCTCCGAGGCTCTGTT

>2269

ACCAAGGCAAGAAGAAGCAACGGGACCCCTAGAAGGAGATGAGTGTGTGGCCCAAG  
GATGGTGGAGCATTGTCCTGAAAGGTAGAACCAAGACTATAGCCTCCGAGGCTCTGTT  
TACCATATTCTTGCTCTTGTGCCAC

>2270

GAAGAAGCAACGGGACCCCTAGAAGGAGATGAGTGTGTGGCCCAAGGATGGTGGAGC  
ATTGTCCTGAAAGGTAGAACCAAGACTATAGCCTCCGAGGCTCTGTTTACCATATTCTT  
GGCTCTTGTGCCACTTCTGTGTCC

>2271

AGTGTGTGGCCCAAGGATGGTGGAGCATTGTCCTGAAAGGTAGAACCAAGACTATAGC  
CTCCGAGGCTCTGTTTACCATATTCTTGCTCTTGTGCCACTTCTGTGTCCAGCAGCTG  
GAGCTTGTAGAAGAAAGATGGGA

>2272

GAGCATTGTCCTGAAAGGTAGAACCAAGACTATAGCCTCCGAGGCTCTGTTTACCATAT  
TCTTGCTCTTGTGCCACTTCTGTGTCCAGCAGCTGGAGCTTGTAGAAGAAAGATGGG  
AAAGACATAGTACAGGAAATGTT

>2273

TGAAAGGTAGAACCAAGACTATAGCCTCCGAGGCTCTGTTTACCATATTCTTGCTCTT  
GTGCCACTTCTGTGTCCAGCAGCTGGAGCTTGTAGAAGAAAGATGGGAAAGACATAGT  
ACAGGAAATGTTCCATTAGCC

>2274

ATAGCCTCCGAGGCTCTGTTTACCATATTCTTGCTCTTGTGCCACTTCTGTGTCCAGCA

GCTGGAGCTTGTAGAAGAAAGATGGGAAAGACATAGTACAGGAAATGTTCCCATTCAG  
CCAGCACTGATTTATCTGCTGC

>2275

TATTCTTGGCTCTTGTGCCACTTCTGTGTCCAGCAGCTGGAGCTTGTAGAAGAAAGATG  
GGAAAGACATAGTACAGGAAATGTTCCCATTCAGCCAGCACTGATTTATCTGCTGCCTG  
GTTTCTCAGGAGGCCTAATCTG

>2276

CTTGTGCCACTTCTGTGTCCAGCAGCTGGAGCTTGTAGAAGAAAGATGGGAAAGACAT  
AGTACAGGAAATGTTCCCATTCAGCCAGCACTGATTTATCTGCTGCCTGGTTTCTCAGG  
AGGCCTAATCTGTAAGAACAGTC

>2277

GAAGAAAGATGGGAAAGACATAGTACAGGAAATGTTCCCATTCAGCCAGCACTGATTT  
ATCTGCTGCCTGGTTTCTCAGGAGGCCTAATCTGTAAGAACAGTCGAGAAGTTTATTTT  
TGCCCTTTAACCTATGTCCATTT

>2278

AGTACAGGAAATGTTCCCATTCAGCCAGCACTGATTTATCTGCTGCCTGGTTTCTCAGG  
AGGCCTAATCTGTAAGAACAGTCGAGAAGTTTATTTCTGCCCTTTAACCTATGTCCATTT  
TCTAGATAGTTTCTAAAAAAG

>2279

AATGTTCCCATTCAGCCAGCACTGATTTATCTGCTGCCTGGTTTCTCAGGAGGCCTAAT  
CTGTAAGAACAGTCGAGAAGTTTATTTCTGCCCTTTAACCTATGTCCATTTTCTAGATAG  
TTTCTAAAAAAGGCATCACAC

>2280

GCTGCCTGGTTTCTCAGGAGGCCTAATCTGTAAGAACAGTCGAGAAGTTTATTTCTGCC  
CTTTAACCTATGTCCATTTTCTAGATAGTTTCTAAAAAAGGCATCACACCAGCTCTTTGA  
GACAACATGTCATATGCAACT

>2281

GGAGGCCTAATCTGTAAGAACAGTCGAGAAGTTTATTTCTGCCCTTTAACCTATGTCCA  
TTTTCTAGATAGTTTCTAAAAAAGGCATCACACCAGCTCTTTGAGACAACATGTCATAT  
GCAACTGTTGGTTTTGGGTGGA

>2282

CCCTTTAACCTATGTCCATTTTCTAGATAGTTTCTAAAAAAGGCATCACACCAGCTCTTT  
GAGACAACATGTCATATGCAACTGTTGGTTTTGGGTGGAATGAACTGAATTGTCAAC  
GGACATTTTTTCTTTCTGTATT

>2283

GTCCATTTTCTAGATAGTTTCTAAAAAAGGCATCACACCAGCTCTTTGAGACAACATGT  
CATATGCAACTGTTGGTTTTGGGTGGAATGAACTGAATTGTCAACGGACATTTTTTCT  
TTCTGTATTCATGTGTTTGGA

>2284

ATTTTCTAGATAGTTTCTAAAAAAGGCATCACACCAGCTCTTTGAGACAACATGTCATA  
TGCAACTGTTGGTTTTGGGTGGAATGAACTGAATTGTCAACGGACATTTTTTCTTTCT  
GTATTCATGTGTTTGGAATAGT

>2285

AGATAGTTTCTAAAAAAGGCATCACACCAGCTCTTTGAGACAACATGTCATATGCAACT  
GTTGGTTTTGGGTGGAATGAACTGAATTGTCAACGGACATTTTTTCTTTCTGTATTCAT  
GTGTTTGGAATAGTGACAACG

>2286

GCATCACACCAGCTCTTTGAGACAACATGTCATATGCAACTGTTGGTTTTGGGTGGAAT  
GAAACTGAATTGTCAACGGACATTTTTCTTTCTGTATTTCATGTGTTGGAATAGTGACA  
ACGTCATTGGTTCAGACTTTG

>2287

AACATGTCATATGCAACTGTTGGTTTTGGGTGGAATGAAACTGAATTGTCAACGGACAT  
TTTTCTTTCTGTATTTCATGTGTTGGAATAGTGACAACGTCATTGGTTCAGACTTTGAG  
CCCCCTTCTGGTTAGGCTCTT

>2288

ATATGCAACTGTTGGTTTTGGGTGGAATGAAACTGAATTGTCAACGGACATTTTTCTT  
TCTGTATTTCATGTGTTGGAATAGTGACAACGTCATTGGTTCAGACTTTGAGCCCCCTT  
CTGGTTAGGCTCTTCAGTATAA

>2289

ATGCAACTGTTGGTTTTGGGTGGAATGAAACTGAATTGTCAACGGACATTTTTCTTTC  
TGATTTCATGTGTTGGAATAGTGACAACGTCATTGGTTCAGACTTTGAGCCCCCTTCT  
GGTTAGGCTCTTCAGTATAAGC

>2290

TGGTTTTGGGTGGAATGAAACTGAATTGTCAACGGACATTTTTCTTTCTGTATTTCATGT  
GTTTGGGAATAGTGACAACGTCATTGGTTCAGACTTTGAGCCCCCTTCTGGTTAGGCTCT  
TCAGTATAAGCCCTTAAAAAT

>2291

GGTGAATGAAACTGAATTGTCAACGGACATTTTTCTTTCTGTATTTCATGTGTTTGGAA  
TAGTGACAACGTCATTGGTTCAGACTTTGAGCCCCCTTCTGGTTAGGCTCTTCAGTATA  
AGCCCTTAAAAATATTTTTGA

>2292

TTTTCTTTCTGTATTTCATGTGTTTGGGAATAGTGACAACGTCATTGGTTCAGACTTTGAG  
CCCCCTTCTGGTTAGGCTCTTCAGTATAAGCCCTTAAAAATATTTTTGACTTTTCAGGGC  
CAGGCGCGGTGGCTCACGCC

>2293

ATTCATGTGTTTGGGAATAGTGACAACGTCATTGGTTCAGACTTTGAGCCCCCTTCTGGT  
TAGGCTCTTCAGTATAAGCCCTTAAAAATATTTTTGACTTTTCAGGGCCAGGCGCGGTG  
GCTCACGCCTGTAATCCCAGCA

>2294

AGCCCCCTTCTGGTTAGGCTCTTCAGTATAAGCCCTTAAAAATATTTTTGACTTTTCAGG  
GCCAGGCGCGGTGGCTCACGCCTGTAATCCCAGCACTTTGGGAGGCCGAGGCAGGTG  
GATCACGAGGTCAGGAGATCGAG

>2295

TTAGGCTCTTCAGTATAAGCCCTTAAAAATATTTTTGACTTTTCAGGGCCAGGCGCGGT  
GGCTCACGCCTGTAATCCCAGCACTTTGGGAGGCCGAGGCAGGTGGATCACGAGGTC  
AGGAGATCGAGACCATCCTGGCTA

>2296

TTTTTGACTTTTCAGGGCCAGGCGCGGTGGCTCACGCCTGTAATCCCAGCACTTTGGG  
AGGCCGAGGCAGGTGGATCACGAGGTCAGGAGATCGAGACCATCCTGGCTAACACGG  
TGAAAGCCCGTCTCTACTAAAAATA

>2297

CAGGGCCAGGCGCGGTGGCTCACGCCTGTAATCCCAGCACTTTGGGAGGCCGAGGCA

GGTGGATCACGAGGTCAGGAGATCGAGACCATCCTGGCTAACACGGTGAAAGCCCGT  
CTCTACTAAAAATACAAAAAATTAGC

>2298

CCCAGCACTTTGGGAGGCCGAGGCAGGTGGATCACGAGGTCAGGAGATCGAGACCAT  
CCTGGCTAACACGGTGAAAGCCCGTCTCTACTAAAAATACAAAAAATTAGCCAGGTGT  
GGTGGCGGGCGCCTGTAGTCCCAGC

>2299

TGGGAGGCCGAGGCAGGTGGATCACGAGGTCAGGAGATCGAGACCATCCTGGCTAAC  
ACGGTGAAAGCCCGTCTCTACTAAAAATACAAAAAATTAGCCAGGTGTGGTGGCGGGC  
GCCTGTAGTCCCAGCTACTCGAGAG

>2300

GAGATCGAGACCATCCTGGCTAACACGGTGAAAGCCCGTCTCTACTAAAAATACAAAA  
AATTAGCCAGGTGTGGTGGCGGGCGCCTGTAGTCCCAGCTACTCGAGAGGCTGAGGCT  
GGAGAATGGCGTGAACCCGGAGGC

>2301

ATCGAGACCATCCTGGCTAACACGGTGAAAGCCCGTCTCTACTAAAAATACAAAAAAT  
TAGCCAGGTGTGGTGGCGGGCGCCTGTAGTCCCAGCTACTCGAGAGGCTGAGGCTGG  
AGAATGGCGTGAACCCGGAGGCAGA

>2302

TGGCTAACACGGTGAAAGCCCGTCTCTACTAAAAATACAAAAAATTAGCCAGGTGTGG  
TGCGGGGCGCCTGTAGTCCCAGCTACTCGAGAGGCTGAGGCTGGAGAATGGCGTGAA  
CCCGGAGGCAGAGTTTGCAGTGAGC

>2303

AAAATTAGCCAGGTGTGGTGGCGGGCGCCTGTAGTCCCAGCTACTCGAGAGGCTGAG  
GCTGGAGAATGGCGTGAACCCGGAGGCAGAGTTTGCAGTGAGCTGAGGTTGTGCCAC  
TGCACTCCAGCCTGGGAGACAGAGCA

>2304

GTGGCGGGCGCCTGTAGTCCCAGCTACTCGAGAGGCTGAGGCTGGAGAATGGCGTGA  
ACCCGGAGGCAGAGTTTGCAGTGAGCTGAGGTTGTGCCACTGCACTCCAGCCTGGGA  
GACAGAGCAAGACTCCGTCTCAAAAA

>2305

GCGCCTGTAGTCCCAGCTACTCGAGAGGCTGAGGCTGGAGAATGGCGTGAACCCGGA  
GGCAGAGTTTGCAGTGAGCTGAGGTTGTGCCACTGCACTCCAGCCTGGGAGACAGAG  
CAAGACTCCGTCTCAAAAAAATAAAA

>2306

CGGAGGCAGAGTTTGCAGTGAGCTGAGGTTGTGCCACTGCACTCCAGCCTGGGAGAC  
AGAGCAAGACTCCGTCTCAAAAAAATAAAAAATAAAAAACATTAAAAAATTGACTTTT  
TGAGTAAAACAAAAACCAAACGAGT

>2307

CTGGGAGACAGAGCAAGACTCCGTCTCAAAAAAATAAAAAATAAAAAACATTAAAAA  
ATTGACTTTTTGAGTAAAACAAAAACCAAACGAGTCCGTGTAAAGTCTAAGATGTTGG  
TTCATCTCAACATTGGGATATTGGA

>2308

CCGTCTCAAAAAAATAAAAAATAAAAAACATTAAAAAATTGACTTTTTGAGTAAAACA  
AAAACCAAACGAGTCCGTGTAAAGTCTAAGATGTTGGTTCATCTCAACATTGGGATATT  
GGAATAGGCCACTTTGGAAGGTT

>2309

CTCAAAAAAATAAAAAATAAAAAACATTAAAAAATTGACTTTTTGAGTAAAAACAAAA  
CCAAACGAGTCCGTGTAAAGTCTAAGATGTTGGTTCATCTCAACATTGGGATATTGGAA  
TAGGCCACTTTGGAAGGTTTCTC

>2310

CGAGTCCGTGTAAAGTCTAAGATGTTGGTTCATCTCAACATTGGGATATTGGAATAGGC  
CACTTTGGAAGGTTTCTCTAATTGATGAAGGGCATGGGCCACCCCATGGATTGCAATGC  
TGTGGCTGTTGGGTGGCATCC

>2311

TGGAATAGGCCACTTTGGAAGGTTTCTCTAATTGATGAAGGGCATGGGCCACCCCATG  
GATTGCAATGCTGTGGCTGTTGGGTGGCATCCAGCTTCTAGGGGATGGTGGCAAACCT  
GGGTGTGCAGGCAGTAGGAAGGA

>2312

AGGCCACTTTGGAAGGTTTCTCTAATTGATGAAGGGCATGGGCCACCCCATGGATTGC  
AATGCTGTGGCTGTTGGGTGGCATCCAGCTTCTAGGGGATGGTGGCAAACCTGGGTG  
TGCAGGCAGTAGGAAGGAGGAGGT

>2313

GAAGGGCATGGGCCACCCCATGGATTGCAATGCTGTGGCTGTTGGGTGGCATCCAGC  
TTCTAGGGGATGGTGGCAAACCTGGGTGTGCAGGCAGTAGGAAGGAGGAGGTAGCTT  
CCAGAGAGAGCCATTGCTGGGGCTC

>2314

CACCCATGGATTGCAATGCTGTGGCTGTTGGGTGGCATCCAGCTTCTAGGGGATGGT  
GGCAAACCTGGGTGTGCAGGCAGTAGGAAGGAGGAGGTAGCTTCCAGAGAGAGCCAT  
TGCTGGGGCTCAAGAAGTTTCTTT

>2315

CCCATGGATTGCAATGCTGTGGCTGTTGGGTGGCATCCAGCTTCTAGGGGATGGTGG  
CAAACCTGGGTGTGCAGGCAGTAGGAAGGAGGAGGTAGCTTCCAGAGAGAGCCATTG  
CTGGGGCTCAAGAAGTTTCTTTCT

>2316

TTGCAATGCTGTGGCTGTTGGGTGGCATCCAGCTTCTAGGGGATGGTGGCAAACCTG  
GGTGTGCAGGCAGTAGGAAGGAGGAGGTAGCTTCCAGAGAGAGCCATTGCTGGGGCT  
CAAGAAGTTTCTTTCTGGGCTCAAG

>2317

AAACTTGGGTGTGCAGGCAGTAGGAAGGAGGAGGTAGCTTCCAGAGAGAGCCATTGC  
TGGGGCTCAAGAAGTTTCTTTCTGGGCTCAAGCATGGTTGCTAGTGGTCCACACAGTG  
CTTTCGTGTGAATTAGAAAAAGCAC

>2318

GAAGGAGGAGGTAGCTTCCAGAGAGAGCCATTGCTGGGGCTCAAGAAGTTTCTTTCT  
GGGCTCAAGCATGGTTGCTAGTGGTCCACACAGTGCTTTCGTGTGAATTAGAAAAAGC  
ACCCTTGTGTGGATGGATGTGGCT

>2319

AGAGAGAGCCATTGCTGGGGCTCAAGAAGTTTCTTTCTGGGCTCAAGCATGGTTGCTA  
GTGGTCCACACAGTGCTTTCGTGTGAATTAGAAAAAGCACCTTGTGTGGATGGATG  
TGGCTCTTAAGTGGGTCTATCCC

>2320

ATTGCTGGGGCTCAAGAAGTTTCTTTCTGGGCTCAAGCATGGTTGCTAGTGGTCCACA

CAGTGCTTTCGTGTGAATTAGAAAAAGCACCCCTGTTGTGGATGGATGTGGCTCTTAAC  
TAGGGTCTATCCCACAGTGAGCT

>2321

CTTTCTGGGCTCAAGCATGGTTGCTAGTGGTCCACACAGTGCTTTCGTGTGAATTAGAA  
AAAGCACCCCTGTTGTGGATGGATGTGGCTCTTAACTAGGGTCTATCCCACAGTGAGCT  
GGTTGGGGCTGGATCTCAAACC

>2322

TCTGGGCTCAAGCATGGTTGCTAGTGGTCCACACAGTGCTTTCGTGTGAATTAGAAAA  
AGCACCCCTGTTGTGGATGGATGTGGCTCTTAACTAGGGTCTATCCCACAGTGAGCTGG  
TTGGGGCTGGATCTCAAACCTCT

>2323

CTTTCGTGTGAATTAGAAAAAGCACCCCTGTTGTGGATGGATGTGGCTCTTAACTAGGG  
TCTATCCCACAGTGAGCTGGTTGGGGCTGGATCTCAAACCTCTTGCCCCTCAATCAGA  
GGCAGGAGGTCCCTGGCCCAAG

>2324

TGAATTAGAAAAAGCACCCCTGTTGTGGATGGATGTGGCTCTTAACTAGGGTCTATCCC  
ACAGTGAGCTGGTTGGGGCTGGATCTCAAACCTCTTGCCCCTCAATCAGAGGCAGGA  
GGTCCCTGGCCCAAGGGGCTCC

>2325

GGGTCTATCCCACAGTGAGCTGGTTGGGGCTGGATCTCAAACCTCTTGCCCCTCAATC  
AGAGGCAGGAGGTCCCTGGCCCAAGGGGCTTCCATGGTTGGAGTGGTCGTCAGCCGA  
AAGCTGTTCTGGTGAGATGTTTTG

>2326

GGGGCTGGATCTCAAACCTCTTGCCCCTCAATCAGAGGCAGGAGGTCCCTGGCCCAA  
GGGGCTTCCATGGTTGGAGTGGTCGTCAGCCGAAAGCTGTTCTGGTGAGATGTTTTGA  
GCTATCAGTTCCAAGTTCCAAG

>2327

GGATCTCAAACCTCTTGCCCCTCAATCAGAGGCAGGAGGTCCCTGGCCCAAGGGGCT  
TCCATGGTTGGAGTGGTCGTCAGCCGAAAGCTGTTCTGGTGAGATGTTTTGAGCTATCA  
GTTCCAAGTTTCCAAGGCCAAG

>2328

CAGGAGGTCCCTGGCCCAAGGGGCTTCCATGGTTGGAGTGGTCGTCAGCCGAAAGCT  
GTTCTGGTGAGATGTTTTGAGCTATCAGTTCCAAGTTTCCAAGGCCAAGGCCTCTGG  
GATCAGTTTCACTGATCCTTCAACC

>2329

CCAAGGGGCTTCCATGGTTGGAGTGGTCGTCAGCCGAAAGCTGTTCTGGTGAGATGT  
TTTGAGCTATCAGTTCCAAGTTTCCAAGGCCAAGGCCTCTGGGATCAGTTTCACTGAT  
CCTTCAACCAGCTTATGTGCCCT

>2330

GGCTTCCATGGTTGGAGTGGTCGTCAGCCGAAAGCTGTTCTGGTGAGATGTTTTGAGC  
TATCAGTTCCAAGTTTCCAAGGCCAAGGCCTCTGGGATCAGTTTCACTGATCCTTCAA  
CCAGCTTATGTGCCCTGTTAGCC

>2331

GAAAGCTGTTCTGGTGAGATGTTTTGAGCTATCAGTTCCAAGTTTCCAAGGCCAAGG  
CCTCTGGGATCAGTTTCACTGATCCTTCAACCAGCTTATGTGCCCTGTTAGCCCAGATA  
CCCCTCCAGAGTGCTTCGCACTG

>2332

GCTATCAGTTCCAAGTTTCCAAAGGCCAAGGCCTCTGGGATCAGTTTCACTGATCCTTC  
AACCAGCTTATGTGCCCTGTTAGCCCAGATACCCCTCCAGAGTGCTTCGCACTGGGCTG  
CAGGTCACTGTGGCCCCACACC

>2333

GTTCCAAGTTTCCAAAGGCCAAGGCCTCTGGGATCAGTTTCACTGATCCTTCAACCAG  
CTTATGTGCCCTGTTAGCCCAGATACCCCTCCAGAGTGCTTCGCACTGGGCTGCAGGTC  
ACTGTGGCCCCACACCATAGAAG

>2334

GCCTCTGGGATCAGTTTCACTGATCCTTCAACCAGCTTATGTGCCCTGTTAGCCCAGAT  
ACCCCTCCAGAGTGCTTCGCACTGGGCTGCAGGTCAGGTCACTGTGGCCCCACACCATAGAAG  
CTGGGGGCCTGTCTGCATGTTCT

>2335

GATCCTTCAACCAGCTTATGTGCCCTGTTAGCCCAGATACCCCTCCAGAGTGCTTCGCA  
CTGGGCTGCAGGTCAGTGTGGCCCCACACCATAGAAGCTGGGGGCCTGTCTGCATGTT  
CTGGCATCCATAAAGCTGCCTGC

>2336

TCAACCAGCTTATGTGCCCTGTTAGCCCAGATACCCCTCCAGAGTGCTTCGCACTGGGC  
TGCAGGTCAGTGTGGCCCCACACCATAGAAGCTGGGGGCCTGTCTGCATGTTCTGGCA  
TCCATAAAGCTGCCTGCAAACGT

>2337

ATACCCCTCCAGAGTGCTTCGCACTGGGCTGCAGGTCAGTGTGGCCCCACACCATAGA  
AGCTGGGGGCCTGTCTGCATGTTCTGGCATCCATAAAGCTGCCTGCAAACGTGAGAGG  
GGGTTTATGGCACCCCTTTTAGCAT

>2338

CTGTGGCCCCACACCATAGAAGCTGGGGGCCTGTCTGCATGTTCTGGCATCCATAAAG  
CTGCCTGCAAACGTGAGAGGGGGTTTATGGCACCCCTTTTAGCATGACTGTCTCTTGTGA  
CCAAGGCCAAGAAAAATAGCACA

>2339

ACACCATAGAAGCTGGGGGCCTGTCTGCATGTTCTGGCATCCATAAAGCTGCCTGCAA  
ACGTGAGAGGGGGTTTATGGCACCCCTTTAGCATGACTGTCTCTTGTGACCAAGGCCA  
AGAAAAATAGCACAAAGATGTAGG

>2340

GCATGTTCTGGCATCCATAAAGCTGCCTGCAAACGTGAGAGGGGGTTTATGGCACCT  
TTTAGCATGACTGTCTCTTGTGACCAAGGCCAAGAAAAATAGCACAAAGATGTAGGAG  
TGGTGAGGAATGAAGATGCACGTG

>2341

CTGGCATCCATAAAGCTGCCTGCAAACGTGAGAGGGGGTTTATGGCACCCCTTTAGCAT  
GACTGTCTCTTGTGACCAAGGCCAAGAAAAATAGCACAAAGATGTAGGAGTGGTGAG  
GAATGAAGATGCACGTGCACGCGC

>2342

AGGGGGTTTATGGCACCCCTTTAGCATGACTGTCTCTTGTGACCAAGGCCAAGAAAA  
TAGCACAAAGATGTAGGAGTGGTGAGGAATGAAGATGCACGTGCACGCGCCCTGCAG  
TCTCAGTCAATGCGCTCTTTAGGGT

>2343

ACTGTCTCTTGTGACCAAGGCCAAGAAAAATAGCACAAAGATGTAGGAGTGGTGAGG



AATGAAGATGCACGTGCACGCGCCCTGCAGTCTCAGTCAATGCGCTCTTTAGGGTTTA  
GTTTGAAAACACAGTGTCTGTGTC

>2344

AAGGCCAAGAAAATAGCACAAAGATGTAGGAGTGGTGAGGAATGAAGATGCACGTG  
CACGCGCCCTGCAGTCTCAGTCAATGCGCTCTTTAGGGTTAGTTTGAAAACACAG  
TGTCTGTCTTATGTAACCAATTC

>2345

ATGTAGGAGTGGTGAGGAATGAAGATGCACGTGCACGCGCCCTGCAGTCTCAGTCAAT  
GCGCTCTTTAGGGTTAGTTTGAAAACACAGTGTCTGTCTTATGTAACCAATTC  
TTTCTTTCTTTCTTTCTTTT

>2346

GAAGATGCACGTGCACGCGCCCTGCAGTCTCAGTCAATGCGCTCTTTAGGGTTAGTTT  
GGAAAACACAGTGTCTGTCTTATGTAACCAATTCCTTTCTTTCTTTCTTTCTTT  
TTTTTTTTTTTTTTTTTGAT

>2347

AGATGCACGTGCACGCGCCCTGCAGTCTCAGTCAATGCGCTCTTTAGGGTTAGTTTGG  
AAAACACAGTGTCTGTCTTATGTAACCAATTCCTTTCTTTCTTTCTTTCTTTT  
TTTTTTTTTTTTTGATGG

>2348

ACGCGCCCTGCAGTCTCAGTCAATGCGCTCTTTAGGGTTAGTTTGAAAACACAGT  
GTCGTGTCTTATGTAACCAATTCCTTTCTTTCTTTCTTTCTTTCTTTCTTTT  
TGTGATGGAGTCTCGTGTCT

>2349

CCACAGTGTCTGTCTTATGTAACCAATTCCTTTCTTTCTTTCTTTCTTTCTTTT  
TTTTTTTGTGATGGAGTCTCGTGTCTTGTCTGTACCCAGGCTGGAGTGCAGTGGCT  
CGATCTCGGCTCACTGCAA

>2350

TCGTGTCTTATGTAACCAATTCCTTTCTTTCTTTCTTTCTTTCTTTCTTTT  
GTGATGGAGTCTCGTGTCTTGTCTGTACCCAGGCTGGAGTGCAGTGGCTCGATCTC  
GGCTCACTGCAACCTCCGCC

>2351

AATTTCTTTCTTTCTTTCTTTCTTTCTTTCTTTCTTTCTTTCTTTCTTTT  
CTTGCTCTGTACCCAGGCTGGAGTGCAGTGGCTCGATCTCGGCTCACTGCAACCTCC  
GCCTCCAGGTTCAAGCGAC

>2352

TGTCTTGCTCTGTACCCAGGCTGGAGTGCAGTGGCTCGATCTCGGCTCACTGCAACC  
TCCGCCTCCAGGTTCAAGCGACTATCCTGCCTCAGCCTCCTGAGTAGCTGGGACTAC  
AGGCGCCCGCCACCAGCCAGCT

>2353

TGGCTCGATCTCGGCTCACTGCAACCTCCGCCTCCAGGTTCAAGCGACTATCCTGCCT  
CAGCCTCCTGAGTAGCTGGGACTACAGGCGCCCGCCACCAGCCAGCTAATTTTTTG  
TGTATTTAGTAGAGACGGGGTTT

>2354

GACTATCCTGCCTCAGCCTCCTGAGTAGCTGGGACTACAGGCGCCCGCCACCAGCCC  
AGCTAATTTTTTGTGTATTTAGTAGAGACGGGGTTTACCGTGTAGCCAGGATGGTCA  
CAATCTCCTGACCTCGTGGTCCG

>2355

GCCTCAGCCTCCTGAGTAGCTGGGACTACAGGCGCCCGCCACCACGCCAGCTAATTT  
TTTGTGTATTTAGTAGAGACGGGGTTTCACCGTGTTAGCCAGGATGGTCACAATCTCCT  
GACCTCGTGGTCCGCCCGCCTTG

>2356

CTGAGTAGCTGGGACTACAGGCGCCCGCCACCACGCCAGCTAATTTTTTGTGTATTTA  
GTAGAGACGGGGTTTCACCGTGTTAGCCAGGATGGTCACAATCTCCTGACCTCGTGGT  
CCGCCCGCCTTGGCCTCCACAG

>2357

CTGGGACTACAGGCGCCCGCCACCACGCCAGCTAATTTTTTGTGTATTTAGTAGAGAC  
GGGGTTTCACCGTGTTAGCCAGGATGGTCACAATCTCCTGACCTCGTGGTCCGCCCGC  
CTTGGCCTCCACAGTGCTGGGA

>2358

AATTTTTTGTGTATTTAGTAGAGACGGGGTTTCACCGTGTTAGCCAGGATGGTCACAAT  
CTCCTGACCTCGTGGTCCGCCCGCCTTGGCCTCCACAGTGCTGGGATTACAGGCGTG  
AGCCACCACGCCCGCCACCAAT

>2359

TTTTTGTGTATTTAGTAGAGACGGGGTTTCACCGTGTTAGCCAGGATGGTCACAATCTC  
CTGACCTCGTGGTCCGCCCGCCTTGGCCTCCACAGTGCTGGGATTACAGGCGTGAGC  
CACCACGCCCGCCACCAATTTT

>2360

GGTTTACCGTGTTAGCCAGGATGGTCACAATCTCCTGACCTCGTGGTCCGCCCGCCTT  
GGCCTCCACAGTGCTGGGATTACAGGCGTGAGCCACCACGCCCGCCACCAATTTCT  
TATACATAGGTTATGGAGCAGGG

>2361

CAGGATGGTCACAATCTCCTGACCTCGTGGTCCGCCCGCCTTGGCCTCCACAGTGCT  
GGGATTACAGGCGTGAGCCACCACGCCCGCCACCAATTTCTTATACATAGGTTATGGA  
GCAGGGAGAAAAGAGACATGCAA

>2362

CTTGGCCTCCACAGTGCTGGGATTACAGGCGTGAGCCACCACGCCCGCCACCAATT  
TCTTATACATAGGTTATGGAGCAGGGAGAAAAGAGACATGCAAACAAGGCAGAATTGGG  
ACCTTTGCAAGAAGACCTTCTTCA

>2363

ATGCAAACAAGGCAGAATTGGGACCTTTGCAAGAAGACCTTCTTCACTCGCCCACTTT  
CTCATACTTTTAGTCACCAAGGCAGGGTCTTTTTAAACAACCTCGAGGCTCAGGCCTAG  
GGGGTTAGGAGAGTAAACCCTAA

>2364

GAATTGGGACCTTTGCAAGAAGACCTTCTTCACTCGCCCACTTTCTCATACTTTTAGTC  
ACCAAGGCAGGGTCTTTTTAAACAACCTCGAGGCTCAGGCCTAGGGGGTTAGGAGAGT  
AAACCCTAAATCCCTTTCACCT

>2365

CCCACTTTCTCATACTTTTAGTCACCAAGGCAGGGTCTTTTTAAACAACCTCGAGGCTC  
AGGCCTAGGGGGTTAGGAGAGTAAACCCTAAATCCCTTTCACCTAGCATGCTTGGGT  
GCCGTGTTGACAAGGTCTCTGAA

>2366

CAACTTCGAGGCTCAGGCCTAGGGGGTTAGGAGAGTAAACCCTAAATCCCTTTCACCC

TAGCATGCTTGGGTGCCGTGTTGACAAGGTCTCTGAAGTGCCCATGGGAAGCAGACCA  
GGCTCTGAGAATAATTTCCATGGA

>2367

TCGAGGCTCAGGCCTAGGGGGTTAGGAGAGTAAACCCTAAATCCCTTTCACCCTAGCA  
TGCTTGGGTGCCGTGTTGACAAGGTCTCTGAAGTGCCCATGGGAAGCAGACCAGGCT  
CTGAGAATAATTTCCATGGAATTAA

>2368

GACAAGGTCTCTGAAGTGCCCATGGGAAGCAGACCAGGCTCTGAGAATAATTTCCATG  
GAATTAATTATTGTTCTTACTCCAATAGATTTGAAATCTATTTAACTTTTCAGGGTCCCCT  
AGCTTTTTAAATGTTTCAAGT

>2369

GAGAATAATTTCCATGGAATTAATTATTGTTCTTACTCCAATAGATTTGAAATCTATTTAA  
CTTTTCAGGGTCCCCTAGCTTTTTAAATGTTTCAAGTGATTCTCTCTGATAGGTTGCCT  
TTTCTCTCCCTGTAGGCTA

>2370

TTAATTATTGTTCTTACTCCAATAGATTTGAAATCTATTTAACTTTTCAGGGTCCCCTAGC  
TTTTTAAATGTTTCAAGTGATTCTCTCTGATAGGTTGCCTTTTCTCTCCCTGTAGGCTAT  
AATTAGTGCCTTTACAC

>2371

GTTCTTACTCCAATAGATTTGAAATCTATTTAACTTTTCAGGGTCCCCTAGCTTTTTAAAT  
GTTTCAAGTGATTCTCTCTGATAGGTTGCCTTTTCTCTCCCTGTAGGCTATAATTAGTGT  
CCTTTACACAAAATTGGC

>2372

ATTTGAAATCTATTTAACTTTTCAGGGTCCCCTAGCTTTTTAAATGTTTCAAGTGATTCT  
CTCTGATAGGTTGCCTTTTCTCTCCCTGTAGGCTATAATTAGTGCCTTTACACAAAATT  
GGCTTAGAATTGGATTAG

>2373

TTTTCAGGGTCCCCTAGCTTTTTAAATGTTTCAAGTGATTCTCTCTGATAGGTTGCCTT  
TTCTCTCCCTGTAGGCTATAATTAGTGCCTTTACACAAAATTGGCTTAGAATTGGATT  
AGAGAAGATAAGAATCAAAT

>2374

CTATAATTAGTGCCTTTACACAAAATTGGCTTAGAATTGGATTAGAGAAGATAAGAAT  
CAAATTACCAGTATTTATCTTGTAATTCAAAAGATCTACTTAAGACACTGTATTA  
AAGGAGTATAAAAAGAAAAGT

>2375

GTCCTTTACACAAAATTGGCTTAGAATTGGATTAGAGAAGATAAGAATCAAATTACCA  
GTATTTATCTTGTAATTCAAAAGATCTACTTAAGACACTGTATTA  
AAAGAAAAGTTTATTCTATGA

>2376

ATTTAGAGAAGATAAGAATCAAATTACCAGTATTTATCTTGTAATTCAAAAGATCTAC  
TTAAGACACTGTATTA  
TTCCTCATGGTCTGAGCAACC

>2377

AGAATCAAATTACCAGTATTTATCTTGTAATTCAAAAGATCTACTTAAGACACTGTAT  
TAAAAAAGGAGTATAAAAAGAAAAGTTTATTCTATGAAAAAGTAAATTCCTCATGGTCTG  
AGCAACCAGGGGTATTTAAT

>2378

ATTCCAAAAGATCTACTTAAGACACTGTATTA AAAAAGGAGTATAAAAAGAAAAGTTTAT  
TCTATGAAAAAGTAAATTCCTCATGGTCTGAGCAACCAGGGGTATTTAATATCAAATCT  
CCAGACTTCCCTTGGAGGCAC

>2379

ACTTAAGACACTGTATTA AAAAAGGAGTATAAAAAGAAAAGTTTATTCTATGAAAAAGTA  
AATTCCTCATGGTCTGAGCAACCAGGGGTATTTAATATCAAATCTCCAGACTTCCCTTG  
GAGGCACCTAAAATTGCCTTT

>2380

TAAAAAAGGAGTATAAAAAGAAAAGTTTATTCTATGAAAAAGTAAATTCCTCATGGTCTG  
AGCAACCAGGGGTATTTAATATCAAATCTCCAGACTTCCCTTGGAGGCACCTAAAATT  
GCCTTTTCCCTTGTGCTCGTT

>2381

GCAACCAGGGGTATTTAATATCAAATCTCCAGACTTCCCTTGGAGGCACCTAAAATTG  
CCTTTTCCCTTGTGCTCGTTTTTATCTCCAGTTGAGCTTCTGAAATATGTTGCCAGGCT  
TTGGATATTGGAGAGCTGGTG

>2382

GGGGTATTTAATATCAAATCTCCAGACTTCCCTTGGAGGCACCTAAAATTGCCTTTTCC  
CTTGCTGCTCGTTTTTATCTCCAGTTGAGCTTCTGAAATATGTTGCCAGGCTTTGGATAT  
TGGAGAGCTGGTGTGGTTTC

>2383

ATCAAATCTCCAGACTTCCCTTGGAGGCACCTAAAATTGCCTTTTCCCTTGTGCTCGT  
TTTTATCTCCAGTTGAGCTTCTGAAATATGTTGCCAGGCTTTGGATATTGGAGAGCTGGT  
GTGGTTTCAGCTTTCATTA

>2384

CCTTGGAGGCACCTAAAATTGCCTTTTCCCTTGTGCTCGTTTTTATCTCCAGTTGAGCT  
TCTGAAATATGTTGCCAGGCTTTGGATATTGGAGAGCTGGTGTGGTTTCAGCTTTCATTA  
AAATTCGGAGGTTTTGACTT

>2385

CTTGCTGCTCGTTTTTATCTCCAGTTGAGCTTCTGAAATATGTTGCCAGGCTTTGGATAT  
TGGAGAGCTGGTGTGGTTTCAGCTTTCATTA AAAATTCGGAGGTTTTGACTTATCTATTAT  
TTCTGATTTGTGGTAAGACA

>2386

TCTGAAATATGTTGCCAGGCTTTGGATATTGGAGAGCTGGTGTGGTTTCAGCTTTCATTA  
AAATTCGGAGGTTTTGACTTATCTATTATTTCTGATTTGTGGTAAGACATAAGCCTCTAA  
AATATGCTATCTTAAAGAGA

>2387

TTGGAGAGCTGGTGTGGTTTCAGCTTTCATTA AAAATTCGGAGGTTTTGACTTATCTATTA  
TTTCTGATTTGTGGTAAGACATAAGCCTCTAAAATATGCTATCTTAAAGAGATACACACA  
AATTTTATCTTAGCATGTTA

>2388

ATTTGTGGTAAGACATAAGCCTCTAAAATATGCTATCTTAAAGAGATACACACAAAATTTT  
ATCTTAGCATGTTAAGTTTTTAAGCCGTTGAGAGATGGCAGAATAGACCTCTGTGGTCT  
CCTGTGTGCTTCTTCGTCCTA

>2389

TGGTAAGACATAAGCCTCTAAAATATGCTATCTTAAAGAGATACACACAAAATTTTATCTT

AGCATGTTAAGTTTTAAGCCGTTGAGAGATGGCAGAATAGACCTCTGTGGTCTCCTGT  
GTGCTTCTTCGTCCTAAAATG

>2390

AAGCCTCTAAAATATGCTATCTTAAAGAGATACACACAAATTTATCTTAGCATGTTAAG  
TTTTAAGCCGTTGAGAGATGGCAGAATAGACCTCTGTGGTCTCCTGTGTGCTTCTTCG  
TCCTAAAATGTCAGCATGCTG

>2391

GAGATACACACAAATTTATCTTAGCATGTTAAGTTTTAAGCCGTTGAGAGATGGCAG  
AATAGACCTCTGTGGTCTCCTGTGTGCTTCTTCGTCCTAAAATGTCAGCATGCTGGTTTT  
CATGTGCTGCCTCGTACAGTA

>2392

TAGCATGTTAAGTTTTAAGCCGTTGAGAGATGGCAGAATAGACCTCTGTGGTCTCCTG  
TGTGCTTCTTCGTCCTAAAATGTCAGCATGCTGGTTTTCATGTGCTGCCTCGTACAGTAA  
GTCCCCAGCAGATTTAAATAA

>2393

AGTTTTAAGCCGTTGAGAGATGGCAGAATAGACCTCTGTGGTCTCCTGTGTGCTTCTT  
CGTCTAAAATGTCAGCATGCTGGTTTTCATGTGCTGCCTCGTACAGTAAGTCCCCAGC  
AGATTTAAATAAGGTTGTGTCA

>2394

GTTGAGAGATGGCAGAATAGACCTCTGTGGTCTCCTGTGTGCTTCTTCGTCCTAAAATG  
TCAGCATGCTGGTTTTCATGTGCTGCCTCGTACAGTAAGTCCCCAGCAGATTTAAATAA  
GGTTGTGTCAAAACATATGCCT

>2395

AGACCTCTGTGGTCTCCTGTGTGCTTCTTCGTCCTAAAATGTCAGCATGCTGGTTTTCAT  
GTGCTGCCTCGTACAGTAAGTCCCCAGCAGATTTAAATAAGGTTGTGTCAAAACATATG  
CCTATGTTTTTTTTAACATCG

>2396

TCCTAAAATGTCAGCATGCTGGTTTTCATGTGCTGCCTCGTACAGTAAGTCCCCAGCAG  
ATTTAAATAAGGTTGTGTCAAAACATATGCCTATGTTTTTTTTAACATCGTTGTCTCATAA  
GTGTGCAGTAATGGCATATT

>2397

TAAAATGTCAGCATGCTGGTTTTCATGTGCTGCCTCGTACAGTAAGTCCCCAGCAGATT  
TAAATAAGGTTGTGTCAAAACATATGCCTATGTTTTTTTTAACATCGTTGTCTCATAAGT  
GTGCAGTAATGGCATATTGAG

>2398

TTTCATGTGCTGCCTCGTACAGTAAGTCCCCAGCAGATTTAAATAAGGTTGTGTCAAAA  
CATATGCCTATGTTTTTTTTAACATCGTTGTCTCATAAGTGTGCAGTAATGGCATATTGAG  
ACTGTTTCATAGACTGGTCAG

>2399

CCCCAGCAGATTTAAATAAGGTTGTGTCAAAACATATGCCTATGTTTTTTTTAACATCGT  
TGTCTCATAAGTGTGCAGTAATGGCATATTGAGACTGTTTCATAGACTGGTCAGCTGCAT  
TTCCTGCAGCCGAGGAACCCT

>2400

CCAGCAGATTTAAATAAGGTTGTGTCAAAACATATGCCTATGTTTTTTTTAACATCGTTG  
TCTCATAAGTGTGCAGTAATGGCATATTGAGACTGTTTCATAGACTGGTCAGCTGCATTC  
CTGCAGCCGAGGAACCCTTT

>2401

AGATTAAATAAGGTTGTGTCAAACATATGCCTATGTTTTTTTAAACATCGTTGTCTCAT  
AAGTGTGCAGTAATGGCATATTGAGACTGTTTCATAGACTGGTCAGCTGCATTTCTGCA  
GCCGAGGAACCCCTTTATTA

>2402

TCAAACATATGCCTATGTTTTTTTAAACATCGTTGTCTCATAAGTGTGCAGTAATGGCA  
TATTGAGACTGTTTCATAGACTGGTCAGCTGCATTTCTGCAGCCGAGGAACCCCTTTATT  
AAGGTGCATTTCTGGGGTTGA

>2403

TAATGGCATATTGAGACTGTTTCATAGACTGGTCAGCTGCATTTCTGCAGCCGAGGAAC  
CCTTTATTAAGGTGCATTTCTGGGGTTGAACTAAACTGCTCACCCCATCAAATGAGG  
AACTTGAGGGGTTTGCAGCCC

>2404

AGACTGTTTCATAGACTGGTCAGCTGCATTTCTGCAGCCGAGGAACCCCTTTATTAAGGT  
GCATTTCTGGGGTTGAACTAAACTGCTCACCCCATCAAATGAGGAACTTGAGGGG  
TTTGCAGCCCAGCATTTTACGGG

>2405

CCTTTATTAAGGTGCATTTCTGGGGTTGAACTAAACTGCTCACCCCATCAAATGAGG  
AACTTGAGGGGTTTGCAGCCCAGCATTTTACGGGCATTTTGCGACTGTGTACCCTT  
GCGTGGCTTCCCGCTTCAGCGAC

>2406

TGCTCACCCCATCAAATGAGGAACTTGAGGGGTTTGCAGCCCAGCATTTTACGGGC  
ACTTTTGCGACTGTGTACCCTTGCCTGGCTTCCCGCTTCAGCGACATTGTTGACTTCAG  
TTTTCTAATCTAATTCTTTTTTT

>2407

TCAAATGAGGAACTTGAGGGGTTTGCAGCCCAGCATTTTACGGGCATTTTGCGACT  
GTGTACCCTTGCCTGGCTTCCCGCTTCAGCGACATTGTTGACTTCAGTTTTCTAATCTAA  
TTCTTTTTTTCTTTTTTGTTT

>2408

TGCAGCCCAGCATTTTACGGGCATTTTGCGACTGTGTACCCTTGCCTGGCTTCCCGCT  
TCAGCGACATTGTTGACTTCAGTTTTCTAATCTAATTCTTTTTTTCTTTTTTGTTTTGAT  
GAGAGTGTGGATACCAAAG

>2409

CATTTTACGGGCATTTTGCGACTGTGTACCCTTGCCTGGCTTCCCGCTTCAGCGACAT  
TGTGACTTCAGTTTTCTAATCTAATTCTTTTTTTCTTTTTTGTTTTGATGAGAGTGTG  
GATACCAAAGCACAAACGAT

>2410

TTGCTGGCTTCCCGCTTCAGCGACATTGTTGACTTCAGTTTTCTAATCTAATTCTTTTT  
TTCTTTTTTGTTTTGATGAGAGTGTGGATACCAAAGCACAAACGATGGATTCTTTTT  
GAAAGAACAAAACATATTTT

>2411

CCGCTTCAGCGACATTGTTGACTTCAGTTTTCTAATCTAATTCTTTTTTTCTTTTTTGTT  
TTGATGAGAGTGTGGATACCAAAGCACAAACGATGGATTCTTTTTGAAAGAACAAA  
ACATATTTGTGAGCAGTTTT

>2412

GTTTTGATGAGAGTGTGGATACCAAAGCACAAACGATGGATTCTTTTTGAAAGAACA

AAAACATATTTTGTGAGCAGTTTTACTTCTGGGAGTGTTATGTGTATACACACACACAC  
ACACACCCCTAAATAATTGAAAGC

>2413

TGAGAGTGTGGATACCAAAGCACAAACGATGGATTCCTTTTGAAAGAACAAAAACAT  
ATTTTGTGAGCAGTTTTACTTCTGGGAGTGTTATGTGTATACACACACACACACACACC  
CTAAATAATTGAAAGCAGGAACT

>2414

TGTATACACACACACACACACCCCTAAATAATTGAAAGCAGGAACTTGAACAGATATT  
TGCACACCCCATGTTTCATAGCAGCATTAGCCAAAATAGCCAAAAGGTGGAATAATTCA  
AATGTTTCATTGACCCATGGATAA

>2415

TGAAAGCAGGAACTTGAACAGATATTTGCACACCCATGTTTCATAGCAGCATTAGCCAA  
AATAGCCAAAAGGTGGAATAATTCAAATGTTTCATTGACCCATGGATAAATTGACAAAA  
TGTGGTATATACATATAGTGGAA

>2416

ACAGATATTTGCACACCCCATGTTTCATAGCAGCATTAGCCAAAATAGCCAAAAGGTGGA  
AATAATTCAAATGTTTCATTGACCCATGGATAAATTGACAAAATGTGGTATATACATATAGT  
GGAATATTATTCAGCCTTAAC

>2417

CATTAGCCAAAATAGCCAAAAGGTGGAATAATTCAAATGTTTCATTGACCCATGGATAA  
ATTGACAAAATGTGGTATATACATATAGTGGAAATATTATTCAGCCTTAACAAGGAAGGAA  
ATTCTGACACATGGTACAACA

>2418

TAGCCAAAATAGCCAAAAGGTGGAATAATTCAAATGTTTCATTGACCCATGGATAAATT  
GACAAAATGTGGTATATACATATAGTGGAAATATTATTCAGCCTTAACAAGGAAGGAAATT  
CTGACACATGGTACAACACAG

>2419

GACAAAATGTGGTATATACATATAGTGGAAATATTATTCAGCCTTAACAAGGAAGGAAATT  
CTGACACATGGTACAACACAGATTAACCTTTGAGGGCATTATACTAGGTGAAATAAGCTA  
GATAGCAAAGGACAGATAGTG

>2420

TCAGCCTTAACAAGGAAGGAAATTCTGACACATGGTACAACACAGATTAACCTTTGAGG  
GCATTATACTAGGTGAAATAAGCTAGATAGCAAAGGACAGATAGTGTATGGTGCCATCT  
ATATGAGGCATCTGTGCTTATAT

>2421

ATGGTACAACACAGATTAACCTTTGAGGGCATTATACTAGGTGAAATAAGCTAGATAGCA  
AAGGACAGATAGTGTATGGTGCCATCTATATGAGGCATCTGTGCTTATATAAAGCAAATT  
TGTAGAAACACGAACTAGAAT

>2422

AACACAGATTAACCTTTGAGGGCATTATACTAGGTGAAATAAGCTAGATAGCAAAGGAC  
AGATAGTGTATGGTGCCATCTATATGAGGCATCTGTGCTTATATAAAGCAAATTTGTAGA  
AACACGAACTAGAATAGATGTT

>2423

ATTATACTAGGTGAAATAAGCTAGATAGCAAAGGACAGATAGTGTATGGTGCCATCTATA  
TGAGGCATCTGTGCTTATATAAAGCAAATTTGTAGAAACACGAACTAGAATAGATGTTG  
CCAGGAGCTGGGGAGAGAGGG

>2424

TAGATAGCAAAGGACAGATAGTGTATGGTGCCATCTATATGAGGCATCTGTGCTTATATA  
AAGCAAATTTGTAGAAACACGAACTAGAATAGATGTTGCCAGGAGCTGGGGAGAGAG  
GGGAATGGGGAGTTAAGGTTGAG

>2425

ATGGTGCCATCTATATGAGGCATCTGTGCTTATATAAAGCAAATTTGTAGAAACACGAAC  
TAGAATAGATGTTGCCAGGAGCTGGGGAGAGAGGGGAATGGGGAGTTAAGGTTGAGT  
GGGTACAGAGTTTCAGTTGGGGG

>2426

TAAAGCAAATTTGTAGAAACACGAACTAGAATAGATGTTGCCAGGAGCTGGGGAGAG  
AGGGGAATGGGGAGTTAAGGTTGAGTGGGTACAGAGTTTCAGTTGGGGGAGATGAAA  
AAGTTCTGTGGCTGGATGGTAGTAAT

>2427

AAATTTGTAGAAACACGAACTAGAATAGATGTTGCCAGGAGCTGGGGAGAGAGGGGA  
ATGGGGAGTTAAGGTTGAGTGGGTACAGAGTTTCAGTTGGGGGAGATGAAAAAGTTC  
TGTGGCTGGATGGTAGTAATGGTTAC

>2428

GCTGGGGAGAGAGGGGAATGGGGAGTTAAGGTTGAGTGGGTACAGAGTTTCAGTTGG  
GGGAGATGAAAAAGTTCTGTGGCTGGATGGTAGTAATGGTTACACAACATCAGGAGTG  
TACTAAATGACACTGATCTGTACAC

>2429

GGAGAGAGGGGAATGGGGAGTTAAGGTTGAGTGGGTACAGAGTTTCAGTTGGGGGAG  
ATGAAAAAGTTCTGTGGCTGGATGGTAGTAATGGTTACACAACATCAGGAGTGTACTA  
AATGACACTGATCTGTACACTTAGA

>2430

AATGGGGAGTTAAGGTTGAGTGGGTACAGAGTTTCAGTTGGGGGAGATGAAAAAGTT  
CTGTGGCTGGATGGTAGTAATGGTTACACAACATCAGGAGTGTACTAAATGACACTGAT  
CTGTACACTTAGAATCTTTAAAAT

>2431

CAGAGTTTCAGTTGGGGGAGATGAAAAAGTTCTGTGGCTGGATGGTAGTAATGGTTAC  
ACAACATCAGGAGTGTACTAAATGACACTGATCTGTACACTTAGAATCTTTAAAATGGT  
AAATTTTAGTTACATAGTTTAC

>2432

GAAAAAGTTCTGTGGCTGGATGGTAGTAATGGTTACACAACATCAGGAGTGTACTAAA  
TGACACTGATCTGTACACTTAGAATCTTTAAAATGGTAAATTTTAGTTACATAGTTTAC  
TACAATAAAAATGTATTTTATG

>2433

TAGTAATGGTTACACAACATCAGGAGTGTACTAAATGACACTGATCTGTACACTTAGAA  
TCTTTAAAATGGTAAATTTTAGTTACATAGTTTACTACAATAAAAATGTATTTTATGTTA  
ATTGCAATACTGGCATTG

>2434

ATCAGGAGTGTACTAAATGACACTGATCTGTACACTTAGAATCTTTAAAATGGTAAATTT  
TAGTTACATAGTTTACTACAATAAAAATGTATTTTATGTTAATTGCAATACTGGCATT  
GAGAAAAAATCTTAGAAA

>2435

ACACTGATCTGTACACTTAGAATCTTTAAAATGGTAAATTTTAGTTACATAGTTTACTA



CAATAAAAATGTATTTTATGTTAATTGCAATACTTGGCATTGAGAAAAAATTCTTAGAA  
AATACTGAGAATATCATACT

>2436

TGTACACTTAGAATCTTTAAAATGGTAAATTTTAGTTACATAGTTTTACTACAATAAAAA  
TGATTTTATGTTAATTGCAATACTTGGCATTGAGAAAAAATTCTTAGAAAATACTGAG  
AATATCATACTGATAAAAAC

>2437

AAAATACTGAGAATATCATACTGATAAAAACCCTCTGCTAAATTTTTTTAAAAAAAAC  
ACACATCGCCTGTACTCCTGAGTATCAGCGATCAGTCTAGCGTTGCCCTTAACTATCAT  
TATTGTTATTGTTAAAGTGAT

>2438

GAATATCATACTGATAAAAACCCTCTGCTAAATTTTTTTAAAAAAAACACACATCGCCT  
GTACTCCTGAGTATCAGCGATCAGTCTAGCGTTGCCCTTAACTATCATTATTGTTATTGT  
TAAAGTGATTTTTATTAAG

>2439

ATAAAAACCCTCTGCTAAATTTTTTTAAAAAAAACACACATCGCCTGTACTCCTGAGT  
ATCAGCGATCAGTCTAGCGTTGCCCTTAACTATCATTATTGTTATTGTTAAAGTGATTTT  
TATTAAGTGCTATCTCTCAA

>2440

AAAAACACACATCGCCTGTACTCCTGAGTATCAGCGATCAGTCTAGCGTTGCCCTTAA  
CTATCATTATTGTTATTGTTAAAGTGATTTTTATTAAGTGCTATCTCTCAAGTGGTATGATT  
ACTTGTTGAGGTCTTGTTG

>2441

ACACATCGCCTGTACTCCTGAGTATCAGCGATCAGTCTAGCGTTGCCCTTAACTATCAT  
TATTGTTATTGTTAAAGTGATTTTTATTAAGTGCTATCTCTCAAGTGGTATGATTACTTGT  
TGAGGTCTTGTTGGTAT

>2442

CGCCTGTACTCCTGAGTATCAGCGATCAGTCTAGCGTTGCCCTTAACTATCATTATTGT  
TATTGTTAAAGTGATTTTTATTAAGTGCTATCTCTCAAGTGGTATGATTACTTGTGAGGT  
CTTGTTGGTATTTGTCA

>2443

AGTATCAGCGATCAGTCTAGCGTTGCCCTTAACTATCATTATTGTTATTGTTAAAGTGAT  
TTTTATTAAGTGCTATCTCTCAAGTGGTATGATTACTTGTGAGGTCTTGTTGGTATTT  
GTCATGTGATTCTAGAAA

>2444

TAACTATCATTATTGTTATTGTTAAAGTGATTTTTATTAAGTGCTATCTCTCAAGTGGTAT  
GATTACTTGTGAGGTCTTGTTGGTATTTGTCATGTGATTCTAGAAAAATCTCCCCCT  
TTTTGGCTCTGAGACATT

>2445

ATCATTATTGTTATTGTTAAAGTGATTTTTATTAAGTGCTATCTCTCAAGTGGTATGATTA  
CTTGTTGAGGTCTTGTTGGTATTTGTCATGTGATTCTAGAAAAATCTCCCCCTTTTGG  
GCTCTGAGACATTCTCTAG

>2446

TATTGTTATTGTTAAAGTGATTTTTATTAAGTGCTATCTCTCAAGTGGTATGATTACTTGT  
TGAGGTCTTGTTGGTATTTGTCATGTGATTCTAGAAAAATCTCCCCCTTTTGGCTCT  
GAGACATTCTAGTTGAC

>2447

TATTGTTAAAGTGATTTTTATTAAGTGCTATCTCTCAAGTGGTATGATTACTTGTTGAGGT  
CTTGTTGGTATTTGTCATGTGATTCTAGAAAAATCTCCCCCTTTTGGCTCTGAGACA  
TTCTCTAGTTGACCTCTTC

>2448

GGTCTTGTTGGTATTTGTCATGTGATTCTAGAAAAATCTCCCCCTTTTGGCTCTGAG  
ACATTCTCTAGTTGACCTCTTCCCAGAGAGAAGTTAAGGAAAATCTCCGCTCTGATTT  
TTTTTCTTTCTGCACTTAAA

>2449

TGTGATTCTAGAAAAATCTCCCCCTTTTGGCTCTGAGACATTCTCTAGTTGACCTCTTC  
CCAGAGAGAAGTTAAGGAAAATCTCCGCTCTGATTTTTTTTTCTTTCTGCACTTAAAT  
AATTAAATAATATCTGTGGCC

>2450

AGAGAAGTTAAGGAAAATCTCCGCTCTGATTTTTTTTTCTTTCTGCACTTAAATAATTA  
AATAATATCTGTGGCCTTACAACACAGGGAGGTTTCAGTGAGGAAGAAAATTCAACTG  
CATTTGCAAATGTCTGAAAAT

>2451

TGATTTTTTTTTCTTTCTGCACTTAAATAATTAATAATATCTGTGGCCTTACAACACAGG  
GAGGTTTCAGTGAGGAAGAAAATTCAACTGCATTTGCAAATGTCTGAAAATTATGGG  
AGAGATGTTTCTGCTTTTAGA

>2452

AATAATATCTGTGGCCTTACAACACAGGGAGGTTTCAGTGAGGAAGAAAATTCAACTG  
CATTTGCAAATGTCTGAAAATTATGGGAGAGATGTTTCTGCTTTTAGACTTGGTACGTA  
TGTGGTCAGGTTTTAGAGGTT

>2453

CACAGGGAGGTTTCAGTGAGGAAGAAAATTCAACTGCATTTGCAAATGTCTGAAAAT  
TATGGGAGAGATGTTTCTGCTTTTAGACTTGGTACGTATGTGGTCAGGTTTTAGAGGT  
TTTCTATTCACCATCTGTGACGG

>2454

GGAAGAAAATTCAACTGCATTTGCAAATGTCTGAAAATTATGGGAGAGATGTTTCTG  
CTTTTAGACTTGGTACGTATGTGGTCAGGTTTTAGAGGTTTTCTATTCACCATCTGTGA  
CGGCCTTGCTCCTCCTGCAA

>2455

GAAAATTCAACTGCATTTGCAAATGTCTGAAAATTATGGGAGAGATGTTTCTGCTTTT  
AGACTTGGTACGTATGTGGTCAGGTTTTAGAGGTTTTCTATTCACCATCTGTGACGGG  
CCTTGCTCCTCCTGCAACTGG

>2456

AATGTCTGAAAATTATGGGAGAGATGTTTCTGCTTTTAGACTTGGTACGTATGTGGTCA  
GGTTTTAGAGGTTTTCTATTCACCATCTGTGACGGCCTTGCTCCTCCTGCAACTGG  
TGGCAGATGTAGCCAGAGATTT

>2457

GAGAGATGTTTCTGCTTTTAGACTTGGTACGTATGTGGTCAGGTTTTAGAGGTTTTCTA  
TTCACCATCTGTGACGGCCTTGCTCCTCCTGCAACTGGTGGCAGATGTAGCCAGAG  
ATTTTGTGAGCTTCTCAACAGC

>2458

TGCTTTTAGACTTGGTACGTATGTGGTCAGGTTTTAGAGGTTTTCTATTCACCATCTGT

GACGGGCCTTGTCTCCTCCTGCAACTGGTGGCAGATGTAGCCAGAGATTTTGTGAGCT  
TCTCAACAGCATCTTTTCCTG

>2459

CGTATGTGGTCAGGTTTTTCAGAGGTTTTCTATTACCCATCTGTGACGGGCCTTGTCTCCT  
CCTGCAACTGGTGGCAGATGTAGCCAGAGATTTTGTGAGCTTCTCAACAGCATCTTTT  
CCTGCTCTTCTCCCTTCCTC

>2460

TTTTCTATTACCCATCTGTGACGGGCCTTGTCTCCTCCTGCAACTGGTGGCAGATGTAG  
CCAGAGATTTTGTGAGCTTCTCAACAGCATCTTTTCCTGCTCTTCTCCCTTCCTCTT  
GTTTGGTTTTTATTCACATGA

>2461

GCAGATGTAGCCAGAGATTTTGTGAGCTTCTCAACAGCATCTTTTCCTGCTCTTCTTC  
CCTTCCTCTTTGTTTGGTTTTTATTCACATGAAAATTTAAAGACCCATAAGGAAATTC  
AGTAAAATCTATGCCCAAAT

>2462

TGTAGCCAGAGATTTTGTGAGCTTCTCAACAGCATCTTTTCCTGCTCTTCTCCCTTCC  
TCTTTGTTTGGTTTTTATTCACATGAAAATTTAAAGACCCATAAGGAAATTC  
AAATCTATGCCCAAATAAGTC

>2463

CTCTTCTCCCTCCTCTTTGTTTGGTTTTTATTCACATGAAAATTTAAAGACCCATAAG  
GAAATTC  
AAAGTGAAAATCTATGCCCAAATAAGTCAGGATCTCAAGATGAAAATATAAG  
TTCTGGAAATGGAAGTTTCCT

>2464

TTGGTTTTTATTCACATGAAAATTTAAAGACCCATAAGGAAATTC  
AAAGTGAAAATCTA  
TGCCCAAATAAGTCAGGATCTCAAGATGAAAATATAAGTTCTGGAATGGAAGTTTCCT  
CTGCCCCCGTGGTGGTATCATA

>2465

AAGACCCATAAGGAAATTC  
AAAGTGAAAATCTA  
TGCCCAAATAAGTCAGGATCTCAAGATGAAAATATAAGTTCTGGAATGGAAGTTTCCT  
CTGCCCCCGTGGTGGTATC  
ATAGCCAGCAGCCTCGTTCTGTGCTTTTG

>2466

ATTC  
AAAGTGAAAATCTA  
TGCCCAAATAAGTCAGGATCTCAAGATGAAAATATAAGTTCTGGAATGGAAGTTTCCT  
CTGCCCCCGTGGTGGTATC  
ATAGCCAGCAGCCTCGTTCTGTGCTTTTGAAGGTTAATGGCCT

>2467

AGATGAAAATATAAGTTCTGGAATGGAAGTTTCCTCTGCCCCCGTGGTGGTATCATAG  
CCAGCAGCCTCGTTCTGTGCTTTTGAAGGTTAATGGCCTGCATGTGAAGGTAGGGGC  
GCACTATATATAGTACCAGGC

>2468

AAAATATAAGTTCTGGAATGGAAGTTTCCTCTGCCCCCGTGGTGGTATCATAGCCAGC  
AGCCTCGTTCTGTGCTTTTGAAGGTTAATGGCCTGCATGTGAAGGTAGGGGCGCACTA  
TATATATAGTACCAGGCGTGTG

>2469

CCTCTGCCCCCGTGGTGGTATCATAGCCAGCAGCCTCGTTCTGTGCTTTTGAAGGTTA  
ATGGCCTGCATGTGAAGGTAGGGGCGCACTATATATATAGTACCAGGCGTGTGGGCGCA  
CTGGCACGGATCTGAAAAAGCG

>2470

AGCAGCCTCGTTCTGTGCTTTTGAAGGTTAATGGCCTGCATGTGAAGGTAGGGGCGC  
ACTATATATATAGTACCAGGCGTGTGGGCGCACTGGCACGGATCTGAAAAAGCGTAAGT  
TTGGCATTCTAGGTTTATTTTA

>2471

GTTCTGTGCTTTTGAAGGTTAATGGCCTGCATGTGAAGGTAGGGGCGCACTATATATAT  
AGTACCAGGCGTGTGGGCGCACTGGCACGGATCTGAAAAAGCGTAAGTTTGGCATTTC  
TAGGTTTATTTAAACTTACAA

>2472

TGTGAAGGTAGGGGCGCACTATATATATAGTACCAGGCGTGTGGGCGCACTGGCACGGA  
TCTGAAAAAGCGTAAGTTTGGCATTCTAGGTTTATTTAAACTTACAACCTTAAACGC  
CAGACACAGAGCTTCTTTCCCA

>2473

AAGGTAGGGGCGCACTATATATATAGTACCAGGCGTGTGGGCGCACTGGCACGGATCTG  
AAAAAGCGTAAGTTTGGCATTCTAGGTTTATTTAAACTTACAACCTTAAACGCCAGA  
CACAGAGCTTCTTTCCACTTA

>2474

TATATATATAGTACCAGGCGTGTGGGCGCACTGGCACGGATCTGAAAAAGCGTAAGTTT  
GGCATTCTAGGTTTATTTAAACTTACAACCTTAAACGCCAGACACAGAGCTTCTTTCC  
CACTTAATGTAACCTATACATT

>2475

TTGGCATTCTAGGTTTATTTAAACTTACAACCTTAAACGCCAGACACAGAGCTTCTTT  
CCCACTTAATGTAACCTATACATTGATTGCTTTTAATTAGTGTGGATCTTTTTTGGTGTT  
TGCAGCTTGGGATATATA

>2476

ACAACCTTAAACGCCAGACACAGAGCTTCTTTCCCACTTAATGTAACCTATACATTGATT  
GCTTTAATTAGTGTGGATCTTTTTTGGTGTTTTGCAGCTTGGGATATATAAAAAGTCT  
GACTTAAATTTAAAAA

>2477

ACACAGAGCTTCTTTCCCACTTAATGTAACCTATACATTGATTGCTTTAATTAGTGTGG  
ATCTTTTTTGGTGTTTTGCAGCTTGGGATATATAAAAAGTCTGACTTAAATTTAAAAA  
AAAAAGCTAACTCCTGACA

>2478

ACAGAGCTTCTTTCCCACTTAATGTAACCTATACATTGATTGCTTTAATTAGTGTGGATC  
TTTTTGGTGTTTTGCAGCTTGGGATATATAAAAAGTCTGACTTAAATTTAAAAA  
AAAAGCTAACTCCTGACATT

>2479

ACTATACATTGATTGCTTTAATTAGTGTGGATCTTTTTTGGTGTTTTGCAGCTTGGGAT  
ATATAAAAAGTCTGACTTAAATTTAAAAAAGCTAACTCCTGACATTCTCACG  
AGTCTTGCAAAAACCAGCAC

>2480

AGCTTGGGATATATAAAAAGTCTGACTTAAATTTAAAAAAGCTAACTCCTG  
ACATTCTCACGAGTCTTGCAAAAACCAGCACGGGAGCCTTAGAAATCTAACCTCCTC  
GTCCTCTTATTTTATCTTGAGT

>2481

AGCTAACTCCTGACATTCTCACGAGTCTTGCAAAAACCAGCACGGGAGCCTTAGAAAT

TCTAACCTCCTCGTCCTCTTTATTTTTATCTTGAGTCAGGTGGGCCAAGAAGCAAGGGA  
AGAGTCCAATATAACATACTTAA

>2482

GAGTCTTGCAAAAACCAGCACGGGAGCCTTAGAAATTCTAACCTCCTCGTCCTCTTTAT  
TTTTATCTTGAGTCAGGTGGGCCAAGAAGCAAGGGAAGAGTCCAATATAACATACTTAA  
TGGATGGAGGTAATTCCTTGG

>2483

TTAGAAATTCTAACCTCCTCGTCCTCTTTATTTTTATCTTGAGTCAGGTGGGCCAAGAAG  
CAAGGGAAGAGTCCAATATAACATACTTAATGGATGGAGGTAATTCCTTGGACTGTTT  
TGGCAGAAATTAAGCATCTGT

>2484

ATTTTTATCTTGAGTCAGGTGGGCCAAGAAGCAAGGGAAGAGTCCAATATAACATACTT  
AATGGATGGAGGTAATTCCTTGGACTGTTTGGCAGAAATTAAGCATCTGTATTTAGAT  
AAAGGTAGTGGTGGGTTGGAT

>2485

AGGTGGGCCAAGAAGCAAGGGAAGAGTCCAATATAACATACTTAATGGATGGAGGTAA  
TTTCTTGGACTGTTTTGGCAGAAATTAAGCATCTGTATTTAGATAAAGGTAGTGGTGG  
GTTGGATTTTCATAGCATAAGCA

>2486

GAGTCCAATATAACATACTTAATGGATGGAGGTAATTCCTTGGACTGTTTTGGCAGAA  
ATTAAGCATCTGTATTTAGATAAAGGTAGTGGTGGGTTGGATTTTCATAGCATAAGCATA  
GTTGCTGAAGATCAATAATAT

>2487

ATACTTAATGGATGGAGGTAATTCCTTGGACTGTTTTGGCAGAAATTAAGCATCTGTAT  
TTAGATAAAGGTAGTGGTGGGTTGGATTTTCATAGCATAAGCATAGTTGCTGAAGATCA  
ATAATATCAAATAATGGGTTC

>2488

GATGGAGGTAATTCCTTGGACTGTTTTGGCAGAAATTAAGCATCTGTATTTAGATAAA  
GGTAGTGGTGGGTTGGATTTTCATAGCATAAGCATAGTTGCTGAAGATCAATAATATCAA  
ATAATGGGTTCTTGGTGAGGG

>2489

AAAGGTAGTGGTGGGTTGGATTTTCATAGCATAAGCATAGTTGCTGAAGATCAATAATA  
TCAAATAATGGGTTCTTGGTGAGGGGGAAAGGAAATGGGGGAGGGGTCTTTTCACTCA  
ACAGTTTGAAATGCTAATGATT

>2490

GTGGTGGGTTGGATTTTCATAGCATAAGCATAGTTGCTGAAGATCAATAATATCAAATAA  
TGGGTTCTTGGTGAGGGGGAAAGGAAATGGGGGAGGGGTCTTTTCACTCAACAGTTT  
GGAAATGCTAATGATTATTTGTG

>2491

TCAATAATATCAAATAATGGGTTCTTGGTGAGGGGGAAAGGAAATGGGGGAGGGGTCT  
TTTCACTCAACAGTTTGGAAATGCTAATGATTATTTGTGGTTTTTCAGCCAGAAATCTTC  
ATATTTGCTTGCAAGCTTCTAT

>2492

TTGGTGAGGGGGAAAGGAAATGGGGGAGGGGTCTTTTCACTCAACAGTTTGGAAATG  
CTAATGATTATTTGTGGTTTTTCAGCCAGAAATCTTCATATTTGCTTGCAAGCTTCTATGG  
CACTGCCGAATTCTACAGTAAA

>2493

TATTTGTGGTTTTTCAGCCCAGAATTCTTCATATTTGCTTGCAAGCTTCTATGGCACTGCC  
GAATTCTACAGTAAATATTTTCGGACATCCTCAGCCCTGTTCTCCTTTCCCTTCAGTAAAT  
TACATATTAAGTAGCCTGG

>2494

TCATATTTGCTTGCAAGCTTCTATGGCACTGCCGAATTCTACAGTAAATATTTTCGGACAT  
CCTCAGCCCTGTTCTCCTTTCCCTTCAGTAAATTACATATTAAGTAGCCTGGTAACTGA  
GCACTGGTTGCTGTGAGATA

>2495

CTTCTATGGCACTGCCGAATTCTACAGTAAATATTTTCGGACATCCTCAGCCCTGTTCTCC  
TTTCCCTTCAGTAAATTACATATTAAGTAGCCTGGTAACTGAGCACTGGTTGCTGTGA  
GATAAGGGCTGGGAAATCAAT

>2496

AATTCTACAGTAAATATTTTCGGACATCCTCAGCCCTGTTCTCCTTTCCCTTCAGTAAATT  
ACATATTAAGTAGCCTGGTAACTGAGCACTGGTTGCTGTGAGATAAGGGCTGGGAAA  
TCAATATGTTTGCCATGTGGCT

>2497

ACATCCTCAGCCCTGTTCTCCTTTCCCTTCAGTAAATTACATATTAAGTAGCCTGGTAA  
CTGAGCACTGGTTGCTGTGAGATAAGGGCTGGGAAATCAATATGTTTGCCATGTGGCTG  
CTTGTTTATGACACCTGCCTC

>2498

TCAGCCCTGTTCTCCTTTCCCTTCAGTAAATTACATATTAAGTAGCCTGGTAACTGAGC  
ACTGGTTGCTGTGAGATAAGGGCTGGGAAATCAATATGTTTGCCATGTGGCTGCTTGT  
TATGACACCTGCCTCTAGAAC

>2499

AAATTACATATTAAGTAGCCTGGTAACTGAGCACTGGTTGCTGTGAGATAAGGGCTGG  
GAAATCAATATGTTTGCCATGTGGCTGCTTGTGTTTATGACACCTGCCTCTAGAACAGTTG  
AGCAATGTTCTGTTTGTAAAG

>2500

TGAGATAAGGGCTGGGAAATCAATATGTTTGCCATGTGGCTGCTTGTGTTTATGACACCTG  
CCTCTAGAACAGTTGAGCAATGTTCTGTTTGTAAAGCTGCATTCAGAAGCTTGATC  
CTCCTAAAACAACCGTGATCTT

>2501

GCTGGGAAATCAATATGTTTGCCATGTGGCTGCTTGTGTTTATGACACCTGCCTCTAGAAC  
AGTTGAGCAATGTTCTGTTTGTAAAGCTGCATTCAGAAGCTTGATCCTCCTAAAAC  
AACCGTGATCTTACTGGGGGAG

>2502

TTGTTTATGACACCTGCCTCTAGAACAGTTGAGCAATGTTCTGTTTGTAAAGCTGCAT  
TTCAGAAGCTTGATCCTCCTAAAACAACCGTGATCTTACTGGGGGAGAGAGAGGTGC  
TACAACAGATATTGATTTAGTT

>2503

CTAGAACAGTTGAGCAATGTTCTGTTTGTAAAGCTGCATTCAGAAGCTTGATCCTC  
CTAAAACAACCGTGATCTTACTGGGGGAGAGAGAGGTGCTACAACAGATATTGATTTT  
AGTTTTTCTAAGTATGGAATTAC

>2504

TTTGTTAAAGCTGCATTCAGAAGCTTGATCCTCCTAAAACAACCGTGATCTTACTGG

GGGAGAGAGAGGTGCTACAACAGATATTGATTTTAGTTTTCTAAGTATGGAATTACAC  
TTCTAAACAGTGGTCTTACAGC

>2505

CTTGATCCTCCTAAAAACAACCGTGATCTTACTGGGGGAGAGAGAGGTGCTACAACAG  
ATATTGATTTAGTTTTCTAAGTATGGAATTACACTTCTAAACAGTGGTCTTACAGCCT  
GTGATTTTTTCCCATGAGGAG

>2506

CCTAAAAACAACCGTGATCTTACTGGGGGAGAGAGAGGTGCTACAACAGATATTGATTTT  
AGTTTTTCTAAGTATGGAATTACACTTCTAAACAGTGGTCTTACAGCCTGTGATTTTTTC  
CCCATGAGGAGGAGATGTAGA

>2507

GGGGGAGAGAGAGGTGCTACAACAGATATTGATTTTAGTTTTCTAAGTATGGAATTAC  
ACTTCTAAACAGTGGTCTTACAGCCTGTGATTTTTTCCCATGAGGAGGAGATGTAGAT  
ACTCTGAATATATATACACA

>2508

GCTACAACAGATATTGATTTTAGTTTTCTAAGTATGGAATTACACTTCTAAACAGTGGT  
CTTACAGCCTGTGATTTTTTCCCATGAGGAGGAGATGTAGATACTCTGAATATATATATA  
CACATACACACATATATAA

>2509

TCTAAGTATGGAATTACACTTCTAAACAGTGGTCTTACAGCCTGTGATTTTTTCCCATG  
AGGAGGAGATGTAGATACTCTGAATATATATACACATACACACATATATAAAATAAATC  
TATTTTATAATGTTTATGA

>2510

GAGGAGATGTAGATACTCTGAATATATATACACATACACACATATATAAAATAAATCTA  
TTTTATAATGTTTATGATGTGGTCAGTTAAAAAAGGAGTGTAGTTTATAATAAGGAAGTG  
TAGGTATTATTAGATTTA

>2511

TAGATACTCTGAATATATATACACATACACACATATATAAAATAAATCTATTTTATAATG  
TTTATGATGTGGTCAGTTAAAAAAGGAGTGTAGTTTATAATAAGGAAGTGTAGGTATTAT  
TTAGATTTATCTCCTCTC

>2512

TACACATACACACATATATAAAATAAATCTATTTTATAATGTTTATGATGTGGTCAGTTAA  
AAAAGGAGTGTAGTTTATAATAAGGAAGTGTAGGTATTATTAGATTTATCTCCTCTCTT  
GGCACCTGGCTTAAAAAAA

>2513

ACATACACACATATATAAAATAAATCTATTTTATAATGTTTATGATGTGGTCAGTTAAAAA  
AGGAGTGTAGTTTATAATAAGGAAGTGTAGGTATTATTAGATTTATCTCCTCTCTTGGC  
ACCTGGCTTAAAAAAA

>2514

TAAAAATAAATCTATTTTATAATGTTTATGATGTGGTCAGTTAAAAAAGGAGTGTAGTTTAT  
AATAAGGAAGTGTAGGTATTATTAGATTTATCTCCTCTCTTGGCACCTGGCTTAAAAAAA  
AAAAAAGTAGTAACAAGA

>2515

TATAATAAGGAAGTGTAGGTATTATTAGATTTATCTCCTCTCTTGGCACCTGGCTTAAA  
AAAAAAGTAGTAACAAGAAACATAGCAGCTGCTGGGAAACATGCATTTTAATCT  
AAGTCTCCAGTGTGGTTTTAGT

>2516

AATAAGGAAAGTGTAGGTATTATTTAGATTTATCTCCTCTCTTGGCACCTGGCTTAAAAA  
AAAAAAGTAGTAACAAGAAACATAGCAGCTGCTGGGAAACATGCATTTTAATCTAAG  
TCTCCAGTGTGGTTTTAGTTA

>2517

CTGGCTTAAAAAAAAAAAAAGTAGTAACAAGAAACATAGCAGCTGCTGGGAAACATG  
CATTTTAATCTAAGTCTCCAGTGTGGTTTTAGTTTAACCAAGTGGATGATACTGTAGTCTC  
AAGGCTTAGCCTGCTGGTGAGTC

>2518

AAAAAAAAAAAAAAGTAGTAACAAGAAACATAGCAGCTGCTGGGAAACATGCATTTTA  
ATCTAAGTCTCCAGTGTGGTTTTAGTTTAACCAAGTGGATGATACTGTAGTCTCAAGGCTT  
AGCCTGCTGGTGAGTCAATGGTT

>2519

AAGTAGTAACAAGAAACATAGCAGCTGCTGGGAAACATGCATTTTAATCTAAGTCTCC  
AGTGTGGTTTTAGTTTAACCAAGTGGATGATACTGTAGTCTCAAGGCTTAGCCTGCTGGT  
GAGTCAATGGTTCTTAAAGCTGT

>2520

CTGCTGGGAAACATGCATTTTAATCTAAGTCTCCAGTGTGGTTTTAGTTTAACCAAGTGG  
ATGATACTGTAGTCTCAAGGCTTAGCCTGCTGGTGAGTCAATGGTTCTTAAAGCTGTGT  
GGTGTGAGCTCAAGTGAGCGAA

>2521

AATCTAAGTCTCCAGTGTGGTTTTAGTTTAACCAAGTGGATGATACTGTAGTCTCAAGGC  
TTAGCCTGCTGGTGAGTCAATGGTTCTTAAAGCTGTGTGGTGTGAGCTCAAGTGAGCG  
AAGCAGTGTGTGGTGTGTGTGCA

>2522

TAAGTCTCCAGTGTGGTTTTAGTTTAACCAAGTGGATGATACTGTAGTCTCAAGGCTTAG  
CCTGCTGGTGAGTCAATGGTTCTTAAAGCTGTGTGGTGTGAGCTCAAGTGAGCGAAGC  
AGTGTGTGGTGTGTGTGCATTGG

>2523

TAGTTTAACCAAGTGGATGATACTGTAGTCTCAAGGCTTAGCCTGCTGGTGAGTCAATGG  
TTCTTAAAGCTGTGTGGTGTGAGCTCAAGTGAGCGAAGCAGTGTGTGGTGTGTGTGCA  
TTGGAGGGTGAGGGGTATGAGGA

>2524

TCAAGGCTTAGCCTGCTGGTGAGTCAATGGTTCTTAAAGCTGTGTGGTGTGAGCTCAA  
GTGAGCGAAGCAGTGTGTGGTGTGTGTGCATTGGAGGGTGAGGGGTATGAGGAGGTA  
GTCAGCCTTGAGGGGAGAAGGGAGA

>2525

AAGGCTTAGCCTGCTGGTGAGTCAATGGTTCTTAAAGCTGTGTGGTGTGAGCTCAAGT  
GAGCGAAGCAGTGTGTGGTGTGTGTGCATTGGAGGGTGAGGGGTATGAGGAGGTAGT  
CAGCCTTGAGGGGAGAAGGGAGACA

>2526

TTAGCCTGCTGGTGAGTCAATGGTTCTTAAAGCTGTGTGGTGTGAGCTCAAGTGAGCG  
AAGCAGTGTGTGGTGTGTGTGCATTGGAGGGTGAGGGGTATGAGGAGGTAGTCAGCC  
TTGGAGGGGAGAAGGGAGACAGGCTA

>2527

AATGGTTCTTAAAGCTGTGTGGTGTGAGCTCAAGTGAGCGAAGCAGTGTGTGGTGTGT



GTGCATTGGAGGGTGAGGGGTATGAGGAGGTAGTCAGCCTTGGAGGGAGAAGGGAGA  
CAGGCTAGGTCTTCTTCACGTGGCC

>2528

GGTGTCAAGTCAAGTGAGCGAAGCAGTGTGTGGTGTGTGCATTGGAGGGTGAGGG  
GTATGAGGAGGTAGTCAGCCTTGGAGGGAGAAGGGAGACAGGCTAGGTCTTCTCAC  
GTGGCCTTCCATTTTGAAAAACAGAA

>2529

TGTGTGTGCATTGGAGGGTGAGGGGTATGAGGAGGTAGTCAGCCTTGGAGGGAGAAG  
GGAGACAGGCTAGGTCTTCTTCACGTGGCCTTCCATTTTGAAAAACAGAAGCGATGAT  
ACAACTTCTTCTTGCCCAAGGGA

>2530

TGGAGGGTGAGGGGTATGAGGAGGTAGTCAGCCTTGGAGGGAGAAGGGAGACAGGCT  
AGGTCTTCTTCACGTGGCCTTCCATTTTGAAAAACAGAAGCGATGATACAACCTTCTCT  
CTTGCCCAAGGATTTCAGTAGAAA

>2531

TCTTCACGTGGCCTTCCATTTTGAAAAACAGAAGCGATGATACAACCTTCTTCTTGCC  
CAAGGGATTTCAGTAGAAAAAATACATTTCCAAACACATTGCGCTACAGTCATTGAAC  
TTCAAAGTGTAAGCATGGATTG

>2532

TGATACAACCTTCTTCTTGCCCAAGGATTTCAGTAGAAAAAATACATTTCCAAACAC  
ATTGCGCTACAGTCATTGAACTTCAAAGTGTAAGCATGGATTGTGTTGGTGCCTTGT  
GGGTGCCCATGACACACACTCT

>2533

CTTGCCCAAGGATTTCAGTAGAAAAAATACATTTCCAAACACATTGCGCTACAGTCAT  
TGAACCTCAAAGTGTAAGCATGGATTGTGTTGGTGCCTTGTGGGTGCCCATGACAC  
ACACTCTTCAATGCTCCTGTGCC

>2534

AGTAGAAAAAATACATTTCCAAACACATTGCGCTACAGTCATTGAACTTCAAAGTGT  
AAAGCATGGATTGTGTTGGTGCCTTGTGGGTGCCCATGACACACACTCTTCAATGCTC  
CTGTGCCTTCTAAGAGGTGTCT

>2535

TCCAAACACATTGCGCTACAGTCATTGAACTTCAAAGTGTAAGCATGGATTGTGTTGG  
TGCCTTGTGGGTGCCCATGACACACACTCTTCAATGCTCCTGTGCCTTCTAAGAGGT  
GTCTGTCTTCTCAACCCAGT

>2536

TCAAAGTGTAAGCATGGATTGTGTTGGTGCCTTGTGGGTGCCCATGACACACACTC  
TTCAATGCTCCTGTGCCTTCTAAGAGGTGTCTGTCTTCTCAACCCAGTGTGTGTCC  
TCTGACGTCTAGTGGATTGCTGC

>2537

TGGATTGTGTTGGTGCCTTGTGGGTGCCCATGACACACACTCTTCAATGCTCCTGTGC  
CTTCTAAGAGGTGTCTGTCTTCTCAACCCAGTGTGTGTCTCTGACGTCTAGTGGGA  
TTGCTGCATACACAGTCAACCC

>2538

GGGTGCCCATGACACACACTCTTCAATGCTCCTGTGCCTTCTAAGAGGTGTCTGTCTT  
TCTCAACCCAGTGTGTGTCTCTGACGTCTAGTGGATTGCTGCATACACAGTCAACCC  
TCCTTAAAGGTTTAAAAAGAA

>2539

GTGCCCATGACACACTCTTCAATGCTCCTGTGCCTTCCTAAGAGGTGTCTGTCTTTC  
TCAACCCCAGTGTGTCTCTGACGTCTAGTGGATTGCTGCATACACAGTCAACCCTC  
CTTAAAAGGTTTAAAAGAAAC

>2540

CACTCTTCAATGCTCCTGTGCCTTCCTAAGAGGTGTCTGTCTTTCTCAACCCCAGTGTG  
TGTCTCTGACGTCTAGTGGATTGCTGCATACACAGTCAACCCTCCTTAAAAGGTTTAA  
AAAGAAACATGAGCTCCCTTTT

>2541

CCTAAGAGGTGTCTGTCTTTCTCAACCCCAGTGTGTCTCTGACGTCTAGTGGATTG  
CTGCATACACAGTCAACCCTCCTTAAAAGGTTTAAAAGAAACATGAGCTCCCTTTTA  
GAGCACCCCAAAGCAGCTGCATT

>2542

TTCTCAACCCCAGTGTGTCTCTGACGTCTAGTGGATTGCTGCATACACAGTCAACC  
CTCCTTAAAAGGTTTAAAAGAAACATGAGCTCCCTTTTAGAGCACCCCAAAGCAGCT  
GCATTCTTGAGTTGGTGCCTGC

>2543

CCCTCCTTAAAAGGTTTAAAAGAAACATGAGCTCCCTTTTAGAGCACCCCAAAGCAG  
CTGCATTCTTGAGTTGGTGCCTGCACTGGGATTCCCATGGACTGGGAACATGATCTCT  
TAATGACACTAATATATTCTGAG

>2544

CCTTAAAAGGTTTAAAAGAAACATGAGCTCCCTTTTAGAGCACCCCAAAGCAGCTGC  
ATTCTTGAGTTGGTGCCTGCACTGGGATTCCCATGGACTGGGAACATGATCTCTTAAT  
GACACTAATATATTCTGAGATCT

>2545

CACTGGGATTCCCATGGACTGGGAACATGATCTCTTAATGACACTAATATATTCTGAGAT  
CTGATTTTTGTTGTGTGTTTTTAACCCAGGTTGGCAGGTTCTCCTTAATCAGTAGTG  
GCAAATGTCTCTTTCTTT

>2546

GGGATTCCCATGGACTGGGAACATGATCTCTTAATGACACTAATATATTCTGAGATCTGA  
TTTTTTGTTGTGTGTTTTTAACCCAGGTTGGCAGGTTCTCCTTAATCAGTAGTGCAA  
AATGTCTCTTTCTTTCTCC

>2547

TAATATATTCTGAGATCTGATTTTTGTTGTGTGTTTTTAACCCAGGTTGGCAGGTTCT  
CCTAATCAGTAGTGCAAATGTCTCTTTCTTTCTCCACGTAATGCTAAATGGCTTAT  
CCAGTCATCTCTCTGCT

>2548

TATATTCTGAGATCTGATTTTTGTTGTGTGTTTTTAACCCAGGTTGGCAGGTTCTCCT  
TAATCAGTAGTGCAAATGTCTCTTTCTTTCTCCACGTAATGCTAAATGGCTTATCCA  
GTCATCTCTCTGCTCAT

>2549

GTGTTTTTTAACCCAGGTTGGCAGGTTCTCCTTAATCAGTAGTGCAAATGTCTCTTT  
CCTTTCTCCACGTAATGCTAAATGGCTTATCCAGTCATCTCTCTGCTCATGGTCAGCC  
CGAGGTGACAGTTAAAATTGG

>2550

AGGTTCTCCTTAATCAGTAGTGCAAATGTCTCTTTCTTTCTCCACGTAATGCTAAAT

GGCTTATCCAGTCATCTCTCTGCTCATGGTCAGCCCGAGGTGACAGTTAAAATTGGA  
TGGAGGTAGCTTGGGGTAGGA

>2551

TGGCAAAATGTCTCTTTCTTTCTCCACGTAATGCTAAATGGCTTATCCAGTCATCTCTC  
TCTGCTCATGGTCAGCCCGAGGTGACAGTTAAAATTGGATGGAGGTAGCTTGGGGTAG  
GAAGACTTGGTGATTTTGGCGG

>2552

CTCTTTCTTTCTCCACGTAATGCTAAATGGCTTATCCAGTCATCTCTCTGCTCATGGT  
CAGCCCGAGGTGACAGTTAAAATTGGATGGAGGTAGCTTGGGGTAGGAAGACTTGGT  
GATTTTGGCGGCACTGGGTCAA

>2553

TATCCAGTCATCTCTCTGCTCATGGTCAGCCCGAGGTGACAGTTAAAATTGGATGGA  
GGTAGCTTGGGGTAGGAAGACTTGGTGATTTTGGCGGCACTGGGTCAAACCCAGGGA  
AACTGAAGCTGTGTCTGCACAGCT

>2554

CTCTCTGCTCATGGTCAGCCCGAGGTGACAGTTAAAATTGGATGGAGGTAGCTTGGGG  
TAGGAAGACTTGGTGATTTTGGCGGCACTGGGTCAAACCCAGGGAAACTGAAGCTGT  
GTCTGCACAGCTGGTTGAAAGGCTG

>2555

CCGAGGTGACAGTTAAAATTGGATGGAGGTAGCTTGGGGTAGGAAGACTTGGTGATTT  
TGCGCGCACTGGGTCAAACCCAGGGAAACTGAAGCTGTGTCTGCACAGCTGGTTGAA  
AGGCTGTGTTGTGATCCAGGGATTT

>2556

GGAGGTAGCTTGGGGTAGGAAGACTTGGTGATTTTGGCGGCACTGGGTCAAACCCAG  
GGAAACTGAAGCTGTGTCTGCACAGCTGGTTGAAAGGCTGTGTTGTGATCCAGGGATT  
TAAGTAAAAATATTCTTTCTTACC

>2557

AGGTAGCTTGGGGTAGGAAGACTTGGTGATTTTGGCGGCACTGGGTCAAACCCAGGG  
AAACTGAAGCTGTGTCTGCACAGCTGGTTGAAAGGCTGTGTTGTGATCCAGGGATTTA  
AGTAAAAATATTCTTTCTTACCAC

>2558

TAGGAAGACTTGGTGATTTTGGCGGCACTGGGTCAAACCCAGGGAAACTGAAGCTGT  
GTCTGCACAGCTGGTTGAAAGGCTGTGTTGTGATCCAGGGATTTAAGTAAAAATATTCT  
TTCCTTACCACCCTCTATGCCCC

>2559

TGATTTTGGCGGCACTGGGTCAAACCCAGGGAAACTGAAGCTGTGTCTGCACAGCTG  
GTTGAAAGGCTGTGTTGTGATCCAGGGATTTAAGTAAAAATATTCTTTCTTACCACCC  
TCTATGCCCCCTACTCCCCAGTAA

>2560

CTGTGTTGTGATCCAGGGATTTAAGTAAAAATATTCTTTCTTACCACCCTCTATGCCCC  
CTACTCCCAGTAATATAGTAGGCATGGGGGTTGACTATTTTGGAGGGGACTAGTATGTA  
TTTAATATTTTCACTAATTT

>2561

TGATCCAGGGATTTAAGTAAAAATATTCTTTCTTACCACCCTCTATGCCCCCTACTCCC  
CAGTAATATAGTAGGCATGGGGGTTGACTATTTTGGAGGGGACTAGTATGATTTAATAT  
TTCATCTAATTTTTGTAGCC

>2562

ACCACCCCTATGCCCCCTACTCCCCAGTAATATAGTAGGCATGGGGGTTGACTTATTTT  
GAGGGGACTAGTATGTATTTAATATTTTCATCTAATTTTTGTAGCCCTGGCCTGGCTGGAT  
GACAAAAGTGTTTAAACTAA

>2563

CCCTCTATGCCCCCTACTCCCCAGTAATATAGTAGGCATGGGGGTTGACTTATTTTGGAGG  
GGACTAGTATGTATTTAATATTTTCATCTAATTTTTGTAGCCCTGGCCTGGCTGGATGACA  
AAAGTGTTTAAACTAAGACC

>2564

AATATAGTAGGCATGGGGGTTGACTTATTTTGGAGGGGACTAGTATGTATTTAATATTTTCAT  
CTAATTTTTGTAGCCCTGGCCTGGCTGGATGACAAAAGTGTTTAAACTAAGACCGATTT  
GAGCAAGTATTTTATCCTCC

>2565

TTTGAGGGGACTAGTATGTATTTAATATTTTCATCTAATTTTTGTAGCCCTGGCCTGGCTGG  
ATGACAAAAGTGTTTAAACTAAGACCGATTTGAGCAAGTATTTTATCCTCCCTCTCGGG  
AGACTATGGGCATAGAACGG

>2566

TGAGGGGACTAGTATGTATTTAATATTTTCATCTAATTTTTGTAGCCCTGGCCTGGCTGGAT  
GACAAAAGTGTTTAAACTAAGACCGATTTGAGCAAGTATTTTATCCTCCCTCTCGGGAG  
ACTATGGGCATAGAACGGTG

>2567

TTCATCTAATTTTTGTAGCCCTGGCCTGGCTGGATGACAAAAGTGTTTAAACTAAGACC  
GATTTGAGCAAGTATTTTATCCTCCCTCTCGGGAGACTATGGGCATAGAACGGTGTGGG  
GATTTGGAGGTGCTGGCAAGTC

>2568

AGTGTTTAAACTAAGACCGATTTGAGCAAGTATTTTATCCTCCCTCTCGGGAGACTATG  
GGCATAGAACGGTGTGGGGATTTGGAGGTGCTGGCAAGTCTGGCCCTTTCTCTTGC  
GTTTACTCAGGCACAGATGGAAA

>2569

TGTTTAAACTAAGACCGATTTGAGCAAGTATTTTATCCTCCCTCTCGGGAGACTATGGG  
CATAGAACGGTGTGGGGATTTGGAGGTGCTGGCAAGTCTGGCCCTTTCTCTTGCCT  
TTACTCAGGCACAGATGGAAAAA

>2570

CGGGAGACTATGGGCATAGAACGGTGTGGGGATTTGGAGGTGCTGGCAAGTCTGGCCC  
CTTTCTCTTGCCTTTACTCAGGCACAGATGGAAAAAGATGAAACTCAATGAGGACCC  
TTTTGTGAGATGCGGCACATTTTCG

>2571

TCTGGCCCTTTCTCTTGCCTTTACTCAGGCACAGATGGAAAAAGATGAAACTCAAT  
GAGGACCCTTTGTGAGATGCGGCACATTTGCTTTGTGGAATTATTAACCTTTTATAAG  
ACTGGGATACTTACAACTTAC

>2572

ACTCAGGCACAGATGGAAAAAGATGAAACTCAATGAGGACCCTTTTGTGAGATGCGG  
CACATTTGCTTTGTGGAATTATTAACCTTTTATAAGACTGGGATACTTACAACTTACC  
GCAGGACCAGACAGTACTATCA

>2573

ATTTGCTTTGTGGAATTATTAACCTTTTATAAGACTGGGATACTTACAACTTACCGCA

GGACCAGACAGTGAATCAGAACTCTCTCTTCTAAAGATCAGCGATCTACAGCTTTCG  
CAAACTTAAGGCTGACTTGG

>2574

TCTTCTAAAGATCAGCGATCTACAGCTTTCGCAAACTTAAGGCTGACTTGGGAATCTA  
GACAGCCCCTAGTATGGTGAGTGACCCTAGAGTGGTTTTTAATGAGGAGATACTCACG  
GGAGCCAGCATCTCGGGGGTCCC

>2575

TAAAGATCAGCGATCTACAGCTTTCGCAAACTTAAGGCTGACTTGGGAATCTAGACA  
GCCCCTAGTATGGTGAGTGACCCTAGAGTGGTTTTTAATGAGGAGATACTCACGGGAG  
CCAGCATCTCGGGGGTCCCCGGGG

>2576

GATCAGCGATCTACAGCTTTCGCAAACTTAAGGCTGACTTGGGAATCTAGACAGCCC  
CTAGTATGGTGAGTGACCCTAGAGTGGTTTTTAATGAGGAGATACTCACGGGAGCCAG  
CATCTCGGGGGTCCCCGGGGGGTT

>2577

TACAGCTTTCGCAAACTTAAGGCTGACTTGGGAATCTAGACAGCCCCTAGTATGGTG  
AGTGACCCTAGAGTGGTTTTTAATGAGGAGATACTCACGGGAGCCAGCATCTCGGGGG  
TCCCCGGGGGGTTCATGGCCAGGA

>2578

CCCTAGTATGGTGAGTGACCCTAGAGTGGTTTTTAATGAGGAGATACTCACGGGAGCC  
AGCATCTCGGGGGTCCCCGGGGGGTTCATGGCCAGGAGCGTTGCAAGCTGGTTTGT  
GTTTGTGTTTGTGAGACAGGGTC

>2579

TGAGTGACCCTAGAGTGGTTTTTAATGAGGAGATACTCACGGGAGCCAGCATCTCGGG  
GGTCCCCGGGGGGTTCATGGCCAGGAGCGTTGCAAGCTGGTTTGTGTTTGTGTTT  
TGAGACAGGGTCTTACTCTGTTG

>2580

GGTTTTTAATGAGGAGATACTCACGGGAGCCAGCATCTCGGGGGTCCCCGGGGGGTTC  
ATGGCCAGGAGCGTTGCAAGCTGGTTTGTGTTTGTGTTTGTGTTTGTGAGACAGGGTCTTAC  
TCTGTTGCTCAGGCTGGAGTGCA

>2581

CTCACGGGAGCCAGCATCTCGGGGGTCCCCGGGGGGTTCATGGCCAGGAGCGTTGCA  
AGCTGGTTTGTGTTTGTGTTTGTGTTTGTGAGACAGGGTCTTACTCTGTTGCTCAGGCTGGA  
GTGCAGTGGCATAATCTCGGCTCA

>2582

GGGGTCCCCGGGGGGTTCATGGCCAGGAGCGTTGCAAGCTGGTTTGTGTTTGTGTTT  
TTTTGAGACAGGGTCTTACTCTGTTGCTCAGGCTGGAGTGAGTGGCATAATCTCGGCT  
CACTGCAACCTTGCTTCTCC

>2583

GGGGGTTTCATGGCCAGGAGCGTTGCAAGCTGGTTTGTGTTTGTGTTTGTGTTTGTGAGACA  
GGGTCTTACTCTGTTGCTCAGGCTGGAGTGAGTGGCATAATCTCGGCTCACTGCAAC  
CTTGCTTCTCCCTGGCTCAAG

>2584

GGAGCGTTGCAAGCTGGTTTGTGTTTGTGTTTGTGTTTGTGAGACAGGGTCTTACTCTGTTG  
CTCAGGCTGGAGTGAGTGGCATAATCTCGGCTCACTGCAACCTTGCTTCTCCCTG  
GCTCAAGCAATTCTCCACATT

>2585

ATAATCTCGGCTCACTGCAACCTTGCTTGCTCTCCCTGGCTCAAGCAATTCTCCACATT  
AGCCTCCAAGTAGCTGGGATTACAGGTGTATGCCACCACAGCCTGCTAATTTTAAAGT  
TTTTGTAGAGATGAGGTTTC

>2586

GCAACCTTGCTTGCTCTCCCTGGCTCAAGCAATTCTCCACATTAGCCTCCAAGTAGC  
TGGGATTACAGGTGTATGCCACCACAGCCTGCTAATTTTAAAGTTTTTGTAGAGATGA  
GGTTTCACTGCATTGCCTAGGC

>2587

AACCTTGCTTGCTCTCCCTGGCTCAAGCAATTCTCCACATTAGCCTCCAAGTAGCTG  
GGATTACAGGTGTATGCCACCACAGCCTGCTAATTTTAAAGTTTTTGTAGAGATGAGG  
TTTCACTGCATTGCCTAGGCTG

>2588

ATTCTCCACATTAGCCTCCAAGTAGCTGGGATTACAGGTGTATGCCACCACAGCCTG  
CTAATTTTAAAGTTTTTGTAGAGATGAGGTTTCACTGCATTGCCTAGGCTGATCTTGAA  
CTCCTGGGCTCAAACAATCTT

>2589

TAGAGATGAGGTTTCACTGCATTGCCTAGGCTGATCTTGAACCTGGGCTCAAACAAT  
CTTCCCTCCTTGCTCTTAAAGTGCTGGGATTACAGGTGTGAGCCACAGCGGAGGC  
CTTGTTGGTGTTTTGTTTGT

>2590

TTTCACTGCATTGCCTAGGCTGATCTTGAACCTGGGCTCAAACAATCTTCCCTCCTT  
GTCCTCTTAAAGTGCTGGGATTACAGGTGTGAGCCACAGCGGAGGCCTGTTTGGTG  
TTTTGTTTGTGTTTGTGTTTGT

>2591

TAGGCTGATCTTGAACCTGGGCTCAAACAATCTTCCCTCCTTGCCTCTTAAAGTGC  
TGGGATTACAGGTGTGAGCCACAGCGGAGGCCTGTTTGGTGTTTTGTTTGTGTTTGT  
TGTTTGTGTTTATGGATCATTAC

>2592

TCAAACAATCTTCCCTCCTTGCCTCTTAAAGTGCTGGGATTACAGGTGTGAGCCACAG  
CGCGAGGCCTGTTTGGTGTTTTGTTTGTGTTTGTGTTTGTGTTTATGGATCATTACCTAT  
AAAGTAATTTAGAATACCCA

>2593

CCTCCTTGCCTCTTAAAGTGCTGGGATTACAGGTGTGAGCCACAGCGGAGGCCTTG  
TTTGGTGTTTTGTTTGTGTTTGTGTTTGTGTTTATGGATCATTACCTATAAAGTAATTTAG  
AATACCCACTCATTATGATC

>2594

CTTGTCTCTTAAAGTGCTGGGATTACAGGTGTGAGCCACAGCGGAGGCCTGTTTG  
GTGTTTTGTTTGTGTTTGTGTTTGTGTTTATGGATCATTACCTATAAAGTAATTTAGAATA  
CCCACTCATTATGATCCAGC

>2595

TCCTCTTAAAGTGCTGGGATTACAGGTGTGAGCCACAGCGGAGGCCTGTTTGGTGT  
TTTTGTTTGTGTTTGTGTTTGTGTTTATGGATCATTACCTATAAAGTAATTTAGAATACCCA  
CTCATTATGATCCAGCCTTC

>2596

CCACAGCGGAGGCCTGTTTGGTGTTTTGTTTGTGTTTGTGTTTGTGTTTATGGATCAT

TACCTATAAAGTAATTTAGAATACCCACTCATTTATGATCCAGCCTTCCCTGCATTTTCTA  
GCGTTGAGGTCCTTTGGGG  
>2597  
GGATCATTACCTATAAAGTAATTTAGAATACCCACTCATTTATGATCCAGCCTTCCCTGCA  
TTTTCTAGCGTTGAGGTCCTTTGGGGCCATAGAAGTATGTTTTTCCAAGACTGATTGCTT  
CGTGTATTTAACCAGGTTT  
>2598  
TTACCTATAAAGTAATTTAGAATACCCACTCATTTATGATCCAGCCTTCCCTGCATTTTCT  
AGCGTTGAGGTCCTTTGGGGCCATAGAAGTATGTTTTTCCAAGACTGATTGCTTCGTGT  
ATTTAACCAGGTTTTTTGTG  
>2599  
ACCCACTCATTTATGATCCAGCCTTCCCTGCATTTTCTAGCGTTGAGGTCCTTTGGGGCC  
ATAGAAGTATGTTTTTCCAAGACTGATTGCTTCGTGTATTTAACCAGGTTTTTTGTGAAG  
GGTTTGATATAAACTGAGTG  
>2600  
TTCCCTGCATTTTCTAGCGTTGAGGTCCTTTGGGGCCATAGAAGTATGTTTTTCCAAGA  
CTGATTGCTTCGTGTATTTAACCAGGTTTTTTGTGAAGGGTTTGATATAAACTGAGTGAC  
TGAAGAGAGGAACATGGTGTG  
>2601  
TAGCGTTGAGGTCCTTTGGGGCCATAGAAGTATGTTTTTCCAAGACTGATTGCTTCGTG  
TATTTAACCAGGTTTTTTGTGAAGGGTTTGATATAAACTGAGTGACTGAAGAGAGGAA  
CATGGTGTGATTTGGTAGAAAGA  
>2602  
TATGTTTTTCCAAGACTGATTGCTTCGTGTATTTAACCAGGTTTTTTGTGAAGGGTTTGA  
TATAAACTGAGTGACTGAAGAGAGGAACATGGTGTGATTTGGTAGAAAGATCTGTAAT  
TTTGGAGTCAAGACTGGCCTAG  
>2603  
GCTTCGTGTATTTAACCAGGTTTTTTGTGAAGGGTTTGATATAAACTGAGTGACTGAAG  
AGAGGAACATGGTGTGATTTGGTAGAAAGATCTGTAATTTTGGAGTCAAGACTGGCCT  
AGATGGACAGCTTGGCCACTTTT  
>2604  
TTTTGTGAAGGGTTTGATATAAACTGAGTGACTGAAGAGAGGAACATGGTGTGATTTG  
GTAGAAAGATCTGTAATTTTGGAGTCAAGACTGGCCTAGATGGACAGCTTGGCCACTT  
TAAAATTTTGTGTCCTTAGCCCC  
>2605  
GTTTGATATAAACTGAGTGACTGAAGAGAGGAACATGGTGTGATTTGGTAGAAAGATC  
TGTAATTTTGGAGTCAAGACTGGCCTAGATGGACAGCTTGGCCACTTTAAAATTTTGT  
GTCCTTAGCCCCATAAACATTTT  
>2606  
TGGTAGAAAGATCTGTAATTTTGGAGTCAAGACTGGCCTAGATGGACAGCTTGGCCAC  
TTTTAAAATTTTGTGTCCTTAGCCCCATAAACATTTTGTGATTGATTTTCTCTCCTGTG  
AATTGGGGACGATATTGCCTAA  
>2607  
TGGCCTAGATGGACAGCTTGGCCACTTTAAAATTTTGTGTCCTTAGCCCCATAAACAT  
TTTGAGATTCAGTTTTTCTCTCCTGTGAATTGGGGACGATATTGCCTAACTTGAAGGTTT  
TTGCAAAGATCAAATGAAAAA

>2608

ACAGCTTGGCCACTTTTAAAATTTGTGTCCTTAGCCCCATAAACATTTTGAGATTCAGT  
TTTCTCCTGTGAATTGGGGACGATATTGCCTAACTTGAAGGTTCTTGCAAAGATCA  
AATGAAAAAATACACATAGAT

>2609

TCCTTAGCCCCATAAACATTTTGAGATTCAGTTTTCTCCTGTGAATTGGGGACGATAT  
TGCCTAACTTGAAGGTTCTTGCAAAGATCAAATGAAAAAATACACATAGATCTCCTGG  
CTATTATTGGAGTGCCCAGTA

>2610

AGCCCCATAAACATTTTGAGATTCAGTTTTCTCCTGTGAATTGGGGACGATATTGCCT  
AACTTGAAGGTTCTTGCAAAGATCAAATGAAAAAATACACATAGATCTCCTGGCTATT  
ATTGGAGTGCCCAGTAAATGC

>2611

TGCCTAACTTGAAGGTTCTTGCAAAGATCAAATGAAAAAATACACATAGATCTCCTGG  
CTATTATTGGAGTGCCCAGTAAATGCTAGTTGCCTTATCCTCCATTTCTTTTTGAGAGC  
TGAAGACCTGATTTTATTTC

>2612

CTTGTAAGGTTCTTGCAAAGATCAAATGAAAAAATACACATAGATCTCCTGGCTATTATT  
GGAGTGCCCAGTAAATGCTAGTTGCCTTATCCTCCATTTCTTTTTGAGAGCTGAAGAC  
CTGATTTTATTCCTTGCAAT

>2613

TCTTGCAAAGATCAAATGAAAAAATACACATAGATCTCCTGGCTATTATTGGAGTGCCC  
AGTAAATGCTAGTTGCCTTATCCTCCATTTCTTTTTGAGAGCTGAAGACCTGATTTTAT  
TTCCTTGCAATTTTCATGTCA

>2614

GCTAGTTGCCTTATCCTCCATTTCTTTTTGAGAGCTGAAGACCTGATTTTATTCCTTG  
CATTTTTCATGTCATTGCCTATAGGGAGATACATTCATATATTGTTGCTCATTTTTGATG  
TGTTACAGTGGTGATAAA

>2615

TTTTATTCCTTGCAATTTTCATGTCATTGCCTATAGGGAGATACATTCATATATTGTTGC  
TCATTTTGTATGTGTTACAGTGGTGATAAAGAACTGATGGTATCCCAGATGGGGAGG  
GGCAGGTAAGGTTTTATCA

>2616

ATTCCTTGCAATTTTCATGTCATTGCCTATAGGGAGATACATTCATATATTGTTGCTCAT  
TTTTGTATGTGTTACAGTGGTGATAAAGAACTGATGGTATCCCAGATGGGGAGGGGCA  
GGTAAGGTTTTATCAGTGG

>2617

ATAGGGAGATACATTCATATATTGTTGCTCATTTTGTATGTGTTACAGTGGTGATAAAG  
AAACTGATGGTATCCCAGATGGGGAGGGGCAGGTAAGGTTTTATCAGTGGCTTTTAATT  
TCTTTATGAAATTGGATGTG

>2618

TGTTGCTCATTTTGTATGTGTTACAGTGGTGATAAAGAACTGATGGTATCCCAGATGG  
GGAGGGGCAGGTAAGGTTTTATCAGTGGCTTTTAATTTCTTTATGAAATTGGATGTGGC  
TCTAGGGAATAGATGTCTCTG

>2619

CTCATTTTGTATGTGTTACAGTGGTGATAAAGAACTGATGGTATCCCAGATGGGGAG



GGGCAGGTAAGGTTTTATCAGTGGCTTTTAATTTCTTTATGAAATTGGATGTGGCTCTAG  
GGAATAGATGTCTCTGGGATG

>2620

ATGGTATCCCAGATGGGGAGGGGCAGGTAAGGTTTTATCAGTGGCTTTTAATTTCTTTAT  
GAAATTGGATGTGGCTCTAGGGAATAGATGTCTCTGGGATGGTCATGTTTTCCCTTGCC  
TTTTGGCTCCTGCAATGAGGA

>2621

GGGGCAGGTAAGGTTTTATCAGTGGCTTTTAATTTCTTTATGAAATTGGATGTGGCTCTA  
GGGAATAGATGTCTCTGGGATGGTCATGTTTTCCCTTGCCCTTTGGCTCCTGCAATGAG  
GACCTCTTTCTGTTGGTGTGG

>2622

GTTTTATCAGTGGCTTTTAATTTCTTTATGAAATTGGATGTGGCTCTAGGGAATAGATGT  
CTCTGGGATGGTCATGTTTTCCCTTGCCCTTTGGCTCCTGCAATGAGGACCTCTTTCTGT  
TGGTGTGGGTCTTGTCTGAG

>2623

GGGAATAGATGTCTCTGGGATGGTCATGTTTTCCCTTGCCCTTTGGCTCCTGCAATGAG  
GACCTCTTTCTGTTGGTGTGGGTCTTGTCTGAGCATGCCAGGGATGGCAGTGAACACA  
TCGATGGTGGTTGGGACGTCCTC

>2624

ATAGATGTCTCTGGGATGGTCATGTTTTCCCTTGCCCTTTGGCTCCTGCAATGAGGACCT  
CTTTCTGTTGGTGTGGGTCTTGTCTGAGCATGCCAGGGATGGCAGTGAACACATCGAT  
GGTGGTTGGGACGTCCTCATTC

>2625

CCTTTTGGCTCCTGCAATGAGGACCTCTTTCTGTTGGTGTGGGTCTTGTCTGAGCATGC  
CAGGGATGGCAGTGAACACATCGATGGTGGTTGGGACGTCCTCATTCAGACCTCTG  
GGACATACTAATTCCCAGACCTC

>2626

AATGAGGACCTCTTTCTGTTGGTGTGGGTCTTGTCTGAGCATGCCAGGGATGGCAGTG  
AACACATCGATGGTGGTTGGGACGTCCTCATTCAGACCTCTGGGACATACTAATTCC  
CAGACCTCTGAAACATGGGTCTC

>2627

GAGGACCTCTTTCTGTTGGTGTGGGTCTTGTCTGAGCATGCCAGGGATGGCAGTGAAC  
ACATCGATGGTGGTTGGGACGTCCTCATTCAGACCTCTGGGACATACTAATTCCCAG  
ACCTCTGAAACATGGGTCTCAGC

>2628

CTTTCTGTTGGTGTGGGTCTTGTCTGAGCATGCCAGGGATGGCAGTGAACACATCGAT  
GGTGGTTGGGACGTCCTCATTCAGACCTCTGGGACATACTAATTCCCAGACCTCTGA  
AACATGGGTCTCAGCTGCTTTGC

>2629

CGATGGTGGTTGGGACGTCCTCATTCAGACCTCTGGGACATACTAATTCCCAGACCT  
CTGAAACATGGGTCTCAGCTGCTTTGCCCTGCAGACTTGTTCAGTAGCTATTTACCT  
TTAGGAGAAAAAAAAAATCCTT

>2630

CAGACCTCTGGGACATACTAATTCCCAGACCTCTGAAACATGGGTCTCAGCTGCTTTGC  
CCTGCAGACTTGTTCAGTAGCTATTTACCTTTAGGAGAAAAAAAAAATCCTTAACCA  
AATGCTTTAGGAAGGCTTTCTT

>2631

CTCAGTAGCTATTTACCTTTAGGAGAAAAAAAAAATCCTTAACCAAATGCTTTAGGAAG  
GCTTTCTTATCGTGGCTGTAAGGTGCTGGTGGGTTGTTGGCAGCCAAGTTTGGGTTTAA  
ATCTCACTGGGGGTTGAGGCTG

>2632

AGCTATTTACCTTTAGGAGAAAAAAAAAATCCTTAACCAAATGCTTTAGGAAGGCTTTC  
TTATCGTGGCTGTAAGGTGCTGGTGGGTTGTTGGCAGCCAAGTTTGGGTTTAAATCTCA  
CTGGGGGTTGAGGCTGCTGAAC

>2633

TTTACCTTTAGGAGAAAAAAAAAATCCTTAACCAAATGCTTTAGGAAGGCTTTCTTATC  
GTGGCTGTAAGGTGCTGGTGGGTTGTTGGCAGCCAAGTTTGGGTTTAAATCTCACTGG  
GGGTTGAGGCTGCTGAACTGCTA

>2634

TTTAGGAGAAAAAAAAAATCCTTAACCAAATGCTTTAGGAAGGCTTTCTTATCGTGGCT  
GTAAGGTGCTGGTGGGTTGTTGGCAGCCAAGTTTGGGTTTAAATCTCACTGGGGGTTG  
AGGCTGCTGAACTGCTATTCCTA

>2635

GGAGAAAAAAAAAATCCTTAACCAAATGCTTTAGGAAGGCTTTCTTATCGTGGCTGTA  
AGGTGCTGGTGGGTTGTTGGCAGCCAAGTTTGGGTTTAAATCTCACTGGGGGTTGAGG  
CTGCTGAACTGCTATTCCTAACAT

>2636

CCTTAACCAAATGCTTTAGGAAGGCTTTCTTATCGTGGCTGTAAGGTGCTGGTGGGTTG  
TTGGCAGCCAAGTTTGGGTTTAAATCTCACTGGGGGTTGAGGCTGCTGAACTGCTATTC  
CTAACATGCTCTTGTGTTTTTA

>2637

CTTTCTTATCGTGGCTGTAAGGTGCTGGTGGGTTGTTGGCAGCCAAGTTTGGGTTTAAA  
TCTCACTGGGGGTTGAGGCTGCTGAACTGCTATTCCTAACATGCTCTTGTGTTTTTATGC  
ATAGACCGTCTTCTGGATCCT

>2638

GGCAGCCAAGTTTGGGTTTAAATCTCACTGGGGGTTGAGGCTGCTGAACTGCTATTCCT  
AACATGCTCTTGTGTTTTTATGCATAGACCGTCTTCTGGATCCTTGGTGAGTTTTTTTTA  
CTCTGGGGTTTTTCAGGAGAAA

>2639

CAGCCAAGTTTGGGTTTAAATCTCACTGGGGGTTGAGGCTGCTGAACTGCTATTCCTAA  
CATGCTCTTGTGTTTTTATGCATAGACCGTCTTCTGGATCCTTGGTGAGTTTTTTTTACTC  
TGGGGTTTTTCAGGAGAAAGG

>2640

TGAGGCTGCTGAACTGCTATTCCTAACATGCTCTTGTGTTTTTATGCATAGACCGTCTTC  
TGGATCCTTGGTGAGTTTTTTTTACTCTGGGGTTTTTCAGGAGAAAGGTTTGTCAATCAT  
CATCACTCTTCTCCTTCATCA

>2641

GCTGCTGAACTGCTATTCCTAACATGCTCTTGTGTTTTTATGCATAGACCGTCTTCTGGA  
TCCTTGGTGAGTTTTTTTTACTCTGGGGTTTTTCAGGAGAAAGGTTTGTCAATCATCATCA  
CTTTCTCCTTCATCACAGC

>2642

CCTAACATGCTCTTGTGTTTTTATGCATAGACCGTCTTCTGGATCCTTGGTGAGTTTTTT

TTACTCTGGGGTTTTTCAGGAGAAAGGTTTGTCAATTCATCATCACTCTTCTCCTTCATCAC  
AGCAGTGGTAACAGTGGTTA

>2643

TGTTTTATGCATAGACCGTCTTCTGGATCCTTGGTGAGTTTTTTTTACTCTGGGGTTTT  
CAGGAGAAAGGTTTGTCAATTCATCATCACTCTTCTCCTTCATCACAGCAGTGGTAACAG  
TGGTTAGAGGGAGGAGGTAGA

>2644

TTTTTTTTACTCTGGGGTTTTTCAGGAGAAAGGTTTGTCAATTCATCATCACTCTTCTCCTT  
CATCACAGCAGTGGTAACAGTGGTTAGAGGGAGGAGGTAGAATCAGTTGTTCAAGTTC  
TTTTTCTTCCAGGTAAGTCCC

>2645

TTTTTACTCTGGGGTTTTTCAGGAGAAAGGTTTGTCAATTCATCATCACTCTTCTCCTTCAT  
CACAGCAGTGGTAACAGTGGTTAGAGGGAGGAGGTAGAATCAGTTGTTCAAGTCTTT  
TTTCTTCCAGGTAAGTCCCCC

>2646

GAAAGGTTTGTCAATTCATCATCACTCTTCTCCTTCATCACAGCAGTGGTAACAGTGGTT  
AGAGGGAGGAGGTAGAATCAGTTGTTCAAGTCTTTTTTCTTCCAGGTAAGTCCCCC  
CACCCCCGGCTGCCCTGCCCT

>2647

CATCACTCTTCTCCTTCATCACAGCAGTGGTAACAGTGGTTAGAGGGAGGAGGTAGAA  
TCAGTTGTTCAAGTCTTTTTTCTTCCAGGTAAGTCCCCCCCACCCCCGGCTGCCCT  
GCCCTCCGCATTTTCTGGGAAG

>2648

ATCACAGCAGTGGTAACAGTGGTTAGAGGGAGGAGGTAGAATCAGTTGTTCAAGTCT  
TTTTTCTTCCAGGTAAGTCCCCCCCACCCCCGGCTGCCCTGCCCTCCGCATTTTCT  
GGGAAGTGAATCTATTGGGAAAT

>2649

CAGCAGTGGTAACAGTGGTTAGAGGGAGGAGGTAGAATCAGTTGTTCAAGTCTTTTT  
TCTTCCAGGTAAGTCCCCCCCACCCCCGGCTGCCCTGCCCTCCGCATTTTCTGGGA  
AGTGAATCTATTGGGAAATGCAT

>2650

AGTTCTTTTTTCTTCCAGGTAAGTCCCCCCCACCCCCGGCTGCCCTGCCCTCCGCA  
TTTTCTGGGAAGTGAATCTATTGGGAAATGCATGGCCTGTGTTTCTGGGATGATTTA  
GCATATGTAGTAAGAGGGGTGC

>2651

CCCACCCCCGGCTGCCCTGCCCTCCGCATTTTCTGGGAAGTGAATCTATTGGGAAA  
TGCATGGGCCTGTGTTTCTGGGATGATTTTAGCATATGTAGTAAGAGGGGTGCTTTTTGC  
TGATAGCCCAGGCGTTGGTCC

>2652

CCGCATTTTCTGGGAAGTGAATCTATTGGGAAATGCATGGCCTGTGTTTCTGGGATGA  
TTTTAGCATATGTAGTAAGAGGGGTGCTTTTTGCTGATAGCCCAGGCGTTGGTCTGTGA  
ATCCTGAGGTGTGGTTAATAA

>2653

CATTTTCTGGGAAGTGAATCTATTGGGAAATGCATGGCCTGTGTTTCTGGGATGATTTT  
AGCATATGTAGTAAGAGGGGTGCTTTTTGCTGATAGCCCAGGCGTTGGTCTGTAAATCC  
TGAGGTGTGGTTAATAAGAG

>2654

GGAAGTGAATCTATTGGGAAATGCATGGGCCTGTGTTTCTGGGATGATTTTAGCATATGT  
AGTAAGAGGGGTGCTTTTTGCTGATAGCCCAGGCGTTGGTCCTGTAATCCTGAGGTGT  
GGTTTAATAAGAGCTGAACAGT

>2655

ATGGGCCTGTGTTTCTGGGATGATTTTAGCATATGTAGTAAGAGGGGTGCTTTTTGCTGA  
TAGCCCAGGCGTTGGTCCTGTAATCCTGAGGTGTGGTTTAATAAGAGCTGAACAGTCAT  
TTAATTATTTATTGGGTGCCT

>2656

ATTTTAGCATATGTAGTAAGAGGGGTGCTTTTTGCTGATAGCCCAGGCGTTGGTCCTGT  
AATCCTGAGGTGTGGTTTAATAAGAGCTGAACAGTCATTTAATTATTTATTGGGTGCCTG  
GAGAATTTTATAGGCAGGAGA

>2657

TTAGCATATGTAGTAAGAGGGGTGCTTTTTGCTGATAGCCCAGGCGTTGGTCCTGTAAT  
CCTGAGGTGTGGTTAATAAGAGCTGAACAGTCATTTAATTATTTATTGGGTGCCTGGA  
GAATTTTATAGGCAGGAGAGCC

>2658

GGGTGCTTTTTGCTGATAGCCCAGGCGTTGGTCCTGTAATCCTGAGGTGTGGTTAATA  
AGAGCTGAACAGTCATTTAATTATTTATTGGGTGCCTGGAGAATTTTATAGGCAGGAGA  
GCCTAGAGCTATTCCAGAAAAA

>2659

CCAGGCGTTGGTCCTGTAATCCTGAGGTGTGGTTAATAAGAGCTGAACAGTCATTTAA  
TTATTTATTGGGTGCCTGGAGAATTTTATAGGCAGGAGAGCCTAGAGCTATTCCAGAAA  
AAAGGCCAATCCTAGAGCTTTT

>2660

TGCCTGGAGAATTTTATAGGCAGGAGAGCCTAGAGCTATTCCAGAAAAAAGGCCAATC  
CTAGAGCTTTTTGTGTGGCTTTCTTCTGGGCTTGAAGTTTTTGATGCTCGCCAACATTC  
ATAGTAGCCCCCAATGCCACCC

>2661

CCTGGAGAATTTTATAGGCAGGAGAGCCTAGAGCTATTCCAGAAAAAAGGCCAATCCT  
AGAGCTTTTTGTGTGGCTTTCTTCTGGGCTTGAAGTTTTTGATGCTCGCCAACATTCAT  
AGTAGCCCCCAATGCCACCCAC

>2662

GAGCCTAGAGCTATTCCAGAAAAAAGGCCAATCCTAGAGCTTTTTGTGTGGCTTTCTTC  
TTGGGCTTGAAGTTTTTGATGCTCGCCAACATTCATAGTAGCCCCCAATGCCACCCACA  
CATTGGGAAGGGACAATAGAGC

>2663

GCCAATCCTAGAGCTTTTTGTGTGGCTTTCTTCTGGGCTTGAAGTTTTTGATGCTCGCC  
AACATTCATAGTAGCCCCCAATGCCACCCACACATTGGGAAGGGACAATAGAGCCAGC  
TAAAGCTCTTTCTTTGTGTGTG

>2664

ATTCATAGTAGCCCCCAATGCCACCCACACATTGGGAAGGGACAATAGAGCCAGCTAA  
AGCTCTTTCTTTGTGTGTGCCCATATTAACCCATCTAGTCAAATGTGGGTACCCTTCCAA  
ACCATTATGTCTTGTTCTCTC

>2665

TCATAGTAGCCCCCAATGCCACCCACACATTGGGAAGGGACAATAGAGCCAGCTAAAG

CTCTTTCTTTGTGTGTGCCCATATTAACCCATCTAGTCAAATGTGGGTACCCTTCCAAAC  
CATTATGTCTTGTTCCTCTCGG

>2666

CACACATTGGGAAGGGACAATAGAGCCAGCTAAAGCTCTTTCTTTGTGTGTGCCCATAT  
TAACCCATCTAGTCAAATGTGGGTACCCTTCCAAACCATTATGTCTTGTTCCTCTCGGCT  
GCTGGGAACATTAAGAACC

>2667

TGGGAAGGGACAATAGAGCCAGCTAAAGCTCTTTCTTTGTGTGTGCCCATATTAACCCA  
TCTAGTCAAATGTGGGTACCCTTCCAAACCATTATGTCTTGTTCCTCTCGGCTGCTGGG  
AACATTAAGAACCCTTATTG

>2668

AAAGCTCTTTCTTTGTGTGTGCCCATATTAACCCATCTAGTCAAATGTGGGTACCCTTCC  
AAACCATTATGTCTTGTTCCTCTCGGCTGCTGGGAACATTAAGAACCCTTATTGAAG  
GCAAACACTACTGTATCAGTG

>2669

AACCATTATGTCTTGTTCCTCTCGGCTGCTGGGAACATTAAGAACCCTTATTGAAGG  
CAAACACTACTGTATCAGTGATGCTGAACTGGAGGTCTGTCAATGGCACTTCATTGCA  
TTGATAATTGTTCTGCTTTGA

>2670

TATGTCTTGTTCCTCTCGGCTGCTGGGAACATTAAGAACCCTTATTGAAGGCAAACA  
TACTGTATCAGTGATGCTGAACTGGAGGTCTGTCAATGGCACTTCATTGCATTGATAA  
TTGTTTCTGCTTTGAACCACA

>2671

GCTGCTGGGAACATTAAGAACCCTTATTGAAGGCAAACACTACTGTATCAGTGATGC  
TGAACTGGAGGTCTGTCAATGGCACTTCATTGCATTGATAATTGTTTCTGCTTTGAAC  
CACAACACTGTGATTATTGAGG

>2672

CTGGGAACATTAAGAACCCTTATTGAAGGCAAACACTACTGTATCAGTGATGCTGAA  
ACTGGAGGTCTGTCAATGGCACTTCATTGCATTGATAATTGTTTCTGCTTTGAACCACA  
AACTGTGATTATTGAGGTTG

>2673

GGCAAACACTACTGTATCAGTGATGCTGAACTGGAGGTCTGTCAATGGCACTTCATTG  
CATTGATAATTGTTTCTGCTTTGAACCACAACACTGTGATTATTGAGGTTGACTGTAAG  
GGCTGAGGGAGCCTTGAGGCC

>2674

GCTGAACTGGAGGTCTGTCAATGGCACTTCATTGCATTGATAATTGTTTCTGCTTTGA  
ACCACAACACTGTGATTATTGAGGTTGACTGTAAGGGCTGAGGGAGCCTTGAGGCCA  
TTGAAAGCATTCTCCTGCCTTA

>2675

GGTCTGTCAATGGCACTTCATTGCATTGATAATTGTTTCTGCTTTGAACCACAACACTGT  
GATTATTGAGGTTGACTGTAAGGGCTGAGGGAGCCTTGAGGCCATTGAAAGCATTCT  
CCTGCCTTTAGGCCAGGCCTAT

>2676

AATGGCACTTCATTGCATTGATAATTGTTTCTGCTTTGAACCACAACACTGTGATTATTG  
AGGTTGACTGTAAGGGCTGAGGGAGCCTTGAGGCCATTGAAAGCATTCTCCTGCCTT  
TAGGCCAGGCCTATGTTATAAG

>2677

GTTCTGACTGTAAGGGCTGAGGGAGCCTTGAGGCCATTGAAAGCATTCTCCTGCCTTTA  
GGCCAGGCCTATGTTATAAGTGAGAGACAGGTGTGGAGTGTGCAGGGAGGGAATTAA  
GATAGATGGTGACCTGGAATTCAGA

>2678

TGTAAGGGCTGAGGGAGCCTTGAGGCCATTGAAAGCATTCTCCTGCCTTTAGGCCAGG  
CCTATGTTATAAGTGAGAGACAGGTGTGGAGTGTGCAGGGAGGGAATTAAGATAGATG  
GTGACCTGGAATTCAGAAGGTGGA

>2679

CTTTAGGCCAGGCCTATGTTATAAGTGAGAGACAGGTGTGGAGTGTGCAGGGAGGGAA  
TTAAGATAGATGGTGACCTGGAATTCAGAAGGTGGACCCCCACCACCCCCAGCCTGA  
GACCAAAGCACAGTTTAACTCTGT

>2680

TATAAGTGAGAGACAGGTGTGGAGTGTGCAGGGAGGGAATTAAGATAGATGGTGACCT  
GGAATTCAGAAGGTGGACCCCCACCACCCCCAGCCTGAGACCAAAGCACAGTTTAA  
CTCTGTCATGGGTCATGTGCAGAGG

>2681

TTAAGATAGATGGTGACCTGGAATTCAGAAGGTGGACCCCCACCACCCCCAGCCTGA  
GACCAAAGCACAGTTTAACTCTGTCATGGGTCATGTGCAGAGGGAAGGGACTGCCCC  
AGAATTAGCAGTTGGTTGAACACCC

>2682

TGGTGACCTGGAATTCAGAAGGTGGACCCCCACCACCCCCAGCCTGAGACCAAAGC  
ACAGTTTAACTCTGTCATGGGTCATGTGCAGAGGGAAGGGACTGCCCCAGAATTAGCA  
GTTGGTTGAACACCCTGCTTAAAAA

>2683

TGAGACCAAAGCACAGTTTAACTCTGTCATGGGTCATGTGCAGAGGGAAGGGACTGC  
CCCAGAATTAGCAGTTGGTTGAACACCCTGCTTAAAAACTTTTTCTTTTCCTTTTTTGT  
GAGTACCGGTCCGCTTGACTAA

>2684

ACCAAAGCACAGTTTAACTCTGTCATGGGTCATGTGCAGAGGGAAGGGACTGCCCCA  
GAATTAGCAGTTGGTTGAACACCCTGCTTAAAAACTTTTTCTTTTCCTTTTTTTGTGAGT  
ACCGGTCCGCTTGACTAAAGAA

>2685

GGGACTGCCCCAGAATTAGCAGTTGGTTGAACACCCTGCTTAAAAACTTTTTCTTTTCC  
TTTTTTGTGAGTACCGGTCCGCTTGACTAAAGAAGTTTTGGTCGTTGTTTTCTTAATT  
TTGGGCTACAGAGTCTCTACC

>2686

GCCCCAGAATTAGCAGTTGGTTGAACACCCTGCTTAAAAACTTTTTCTTTTCCTTTTTT  
GTGAGTACCGGTCCGCTTGACTAAAGAAGTTTTGGTCGTTGTTTTCTTAATTTTGGGC  
TACAGAGTCTCTACCTACATT

>2687

GTTGAACACCCTGCTTAAAAACTTTTTCTTTTCCTTTTTTTGTGAGTACCGGTCCGCTTG  
GACTAAAGAAGTTTTGGTCGTTGTTTTCTTAATTTTGGGCTACAGAGTCTCTACCTACAT  
TTGTGTTTTGTGTTTTGGTA

>2688

TTTTTGTGAGTACCGGTCCGCTTGACTAAAGAAGTTTTGGTCGTTGTTTTCTTAATTTT

GGGCTACAGAGTCTCTACCTACATTTGTGTTTTGTGTTTTGGTAACCACATGTAACAGC  
CGGTGGAATCTTTTTCTCTT

>2689

TCCGCTTGGACTAAAGAAGTTTTGGTCGTTGTTTTCTAATTTTGGGCTACAGAGTCTC  
TACCTACATTTGTGTTTTGTGTTTTGGTAACCACATGTAACAGCCGGTGAATCTTTTTT  
CTCTTTGCTTTCTCTGAACTT

>2690

GGACTAAAGAAGTTTTGGTCGTTGTTTTCTAATTTTGGGCTACAGAGTCTCTACCTAC  
ATTTGTGTTTTGTGTTTTGGTAACCACATGTAACAGCCGGTGAATCTTTTTTCTCTTTG  
CTTTCTCTGAACTTTCAAAG

>2691

CTTAATTTTGGGCTACAGAGTCTCTACCTACATTTGTGTTTTGTGTTTTGGTAACCACAT  
GTAACAGCCGGTGAATCTTTTTTCTCTTTGCTTTCTCTGAACTTTCAAAGAGTAGGC  
CCCTATCTCTCGGGGGATTAA

>2692

TGTTTTGGTAACCACATGTAACAGCCGGTGAATCTTTTTTCTCTTTGCTTTCTCTGAAC  
TTTCAAAGAGTAGGCCCTATCTCTCGGGGGATTAACTCCTCGTGGCCCCTGGGTGCT  
TGGTGCTCCCCACCCTGTGT

>2693

TCTTTTTTCTCTTTGCTTTCTCTGAACTTTCAAAGAGTAGGCCCTATCTCTCGGGGGA  
TTAACTCCTCGTGGCCCCTGGGTGCTTGGTGCTCCCCACCCTGTGTCAGCATCTAAAC  
CTCTGCACACAGGATGTTTTC

>2694

TTTGCTTTCTCTGAACTTTCAAAGAGTAGGCCCTATCTCTCGGGGGATTAACTCCTC  
GTGGCCCCTGGGTGCTTGGTGCTCCCCACCCTGTGTCAGCATCTAAACCTCTGCACA  
CAGGATGTTTTCTCTAGCGCTTA

>2695

AAGAGTAGGCCCTATCTCTCGGGGGATTAACTCCTCGTGGCCCCTGGGTGCTTGGTG  
TCCCCACCCTGTGTCAGCATCTAAACCTCTGCACACAGGATGTTTTCTCTAGCGCTTA  
TCAGATGCTTTAGAAGATGCGG

>2696

CTCCTCGTGGCCCCTGGGTGCTTGGTGCTCCCCACCCTGTGTCAGCATCTAAACCTCT  
GCACACAGGATGTTTTCTCTAGCGCTTATCAGATGCTTTAGAAGATGCGGGGTGGAGAT  
AGAGGTAACGTTAAACCCATCC

>2697

TGTCAGCATCTAAACCTCTGCACACAGGATGTTTTCTCTAGCGCTTATCAGATGCTTTAG  
AAGATGCGGGGTGGAGATAGAGGTAACGTTAAACCCATCCTGGATTCTTTTCATGAACT  
CAGCCACAGAGCAGAGGGAGG

>2698

AACCTCTGCACACAGGATGTTTTCTCTAGCGCTTATCAGATGCTTTAGAAGATGCGGGG  
TGGAGATAGAGGTAACGTTAAACCCATCCTGGATTCTTTTCATGAACTCAGCCACAGAG  
CAGAGGGAGGCTTGGCTGGAGC

>2699

CTGCACACAGGATGTTTTCTCTAGCGCTTATCAGATGCTTTAGAAGATGCGGGGTGGAG  
ATAGAGGTAACGTTAAACCCATCCTGGATTCTTTTCATGAACTCAGCCACAGAGCAGAG  
GGAGGCTTGGCTGGAGCAAACA

>2700

TTAACCCATCCTGGATTCTTTTCATGAACTCAGCCACAGAGCAGAGGGAGGCTTGGCT  
GGAGCAAACAATGTTGGGCCTTCTATTTCAAACAGAGGTGTGGGGGCTTGTGGTGGCA  
TCAGTGGTGCACTGAACAACCCTC

>2701

GAACTCAGCCACAGAGCAGAGGGAGGCTTGGCTGGAGCAAACAATGTTGGGCCTTCT  
ATTTCAAACAGAGGTGTGGGGGCTTGTGGTGGCATCAGTGGTGCCTGAACAACCCTC  
CCTGACCCTAGCGTGTGGGTTTGGGA

>2702

AGAGCAGAGGGAGGCTTGGCTGGAGCAAACAATGTTGGGCCTTCTATTTCAAACAGA  
GGTGTGGGGGCTTGTGGTGGCATCAGTGGTGCCTGAACAACCCTCCCTGACCCTAGC  
GTGTGGGTTTGGAGCCTGGGGAATC

>2703

GCAGAGGGAGGCTTGGCTGGAGCAAACAATGTTGGGCCTTCTATTTCAAACAGAGGT  
GTGGGGGCTTGTGGTGGCATCAGTGGTGCCTGAACAACCCTCCCTGACCCTAGCGTG  
TGGGTTTGGAGCCTGGGGAATCAAA

>2704

GGCTTGGCTGGAGCAAACAATGTTGGGCCTTCTATTTCAAACAGAGGTGTGGGGGCTT  
GTGGTGGCATCAGTGGTGCCTGAACAACCCTCCCTGACCCTAGCGTGTGGGTTTGGGA  
GCCTGGGGAATCAAAGAGAAATCT

>2705

ATTTCAAACAGAGGTGTGGGGGCTTGTGGTGGCATCAGTGGTGCCTGAACAACCCTC  
CCTGACCCTAGCGTGTGGGTTTGGAGCCTGGGGAATCAAAGAGAAATCTAACAACTA  
TTCTTTTTACGTGTGGGCTGAAT

>2706

CCCTGACCCTAGCGTGTGGGTTTGGAGCCTGGGGAATCAAAGAGAAATCTAACAACT  
ATTCTTTTTACGTGTGGGCTGAATGAATGTGTGGGTTATCCACATCAGTTTCTTCTCTC  
TTCTCATCCTCCCTCCTCCTC

>2707

CTGACCCTAGCGTGTGGGTTTGGAGCCTGGGGAATCAAAGAGAAATCTAACAACTAT  
TCTTTTTACGTGTGGGCTGAATGAATGTGTGGGTTATCCACATCAGTTTCTTCTCTCT  
CTCATCCTCCCTCCTCCTCGC

>2708

GGGTTTGGAGCCTGGGGAATCAAAGAGAAATCTAACAACTATTCTTTTTACGTGTG  
GGCTGAATGAATGTGTGGGTTATCCACATCAGTTTCTTCTCTTCTCATCCTCCCTCCT  
TCCTCGCAGACCAGCATTTTGG

>2709

GTTTGGAGCCTGGGGAATCAAAGAGAAATCTAACAACTATTCTTTTTACGTGTGGG  
CTGAATGAATGTGTGGGTTATCCACATCAGTTTCTTCTCTTCTCATCCTCCCTCCTC  
CTCGCAGACCAGCATTTTGGCC

>2710

GGAGCCTGGGGAATCAAAGAGAAATCTAACAACTATTCTTTTTACGTGTGGGCTGA  
ATGAATGTGTGGGTTATCCACATCAGTTTCTTCTCTTCTCATCCTCCCTCCTCCTCG  
CAGACCAGCATTTTGGCCAGGG

>2711

TCAAAGAGAAATCTAACAACTATTCTTTTTACGTGTGGGCTGAATGAATGTGTGGGT



TATCCACATCAGTTTCTTCTCTTCTCATCCTCCCTCCTCCTCGCAGACCAGCATTTT  
GGCCAGGGTGCCCAGTTTGAG

>2712

GGTTATCCACATCAGTTTCTTCTCTTCTCATCCTCCCTCCTCCTCGCAGACCAGCAT  
TTTGGCCAGGGTGCCCAGTTTGAGCTCATTACCAAAGGTGAATAGGGAAGGGAGTAG  
AAACCAAATTAGGCACCTGTCT

>2713

CACATCAGTTTCTTCTCTTCTCATCCTCCCTCCTCCTCGCAGACCAGCATTTTGCC  
AGGGTGCCCAGTTTGAGCTCATTACCAAAGGTGAATAGGGAAGGGAGTAGAAACCA  
AATTAGGCACCTGTCTGACAACA

>2714

CTCATCCTCCCTCCTCCTCGCAGACCAGCATTTTGCCAGGGTGCCCAGTTTGAGCTC  
ATTTACCAAAGGTGAATAGGGAAGGGAGTAGAAACCAAATTAGGCACCTGTCTGACAA  
CACAAGGATCTTTTCTACAATGG

>2715

CAGGGTGCCCAGTTTGAGCTCATTACCAAAGGTGAATAGGGAAGGGAGTAGAAACC  
AAATTAGGCACCTGTCTGACAACACAAGGATCTTTTCTACAATGGTGCATTTGGATTAT  
GCAGAGTTTATAGATTTTCTGTTTT

>2716

GGTGAATAGGGAAGGGAGTAGAAACCAAATTAGGCACCTGTCTGACAACACAAGGAT  
CTTTTCTACAATGGTGCATTTGGATTATGCAGAGTTTATAGATTTTCTGTTTTATCCCAGG  
GTGAACGTGTGTAGAAAACCTGGG

>2717

GAAACCAAATTAGGCACCTGTCTGACAACACAAGGATCTTTTCTACAATGGTGCATTTG  
GATTATGCAGAGTTTATAGATTTTCTGTTTTATCCCAGGGTGAACGTGTGTAGAAAACCTG  
GGACCTAACCATGTTCTTCTCT

>2718

CACCTGTCTGACAACACAAGGATCTTTTCTACAATGGTGCATTTGGATTATGCAGAGTT  
TTAGATTTTCTGTTTTATCCCAGGGTGAACGTGTGTAGAAAACCTGGGACCTAACCATGT  
TCTTCTTTCAGTCTTATGGTC

>2719

GGATCTTTTCTACAATGGTGCATTTGGATTATGCAGAGTTTATAGATTTTCTGTTTTATCCC  
AGGGTGAACGTGTGTAGAAAACCTGGGACCTAACCATGTTCTTCTTTCAGTCTTATGGT  
CATTGCTACTTTGAAGGCAG

>2720

ATTATGCAGAGTTTATAGATTTTCTGTTTTATCCCAGGGTGAACGTGTGTAGAAAACCTGG  
GACCTAACCATGTTCTTCTTTCAGTCTTATGGTCATTGCTACTTTGAAGGCAGAAAGG  
ATAAAAAGTAGCATAGGGAGTGG

>2721

TTAGATTTTCTGTTTTATCCCAGGGTGAACGTGTGTAGAAAACCTGGGACCTAACCATGT  
TCTTCTTTCAGTCTTATGGTCATTGCTACTTTGAAGGCAGAAAGGATAAAAAGTAGCAT  
AGGGAGTGTTTACCATAACTG

>2722

ACTGGGACCTAACCATGTTCTTCTTTCAGTCTTATGGTCATTGCTACTTTGAAGGCAG  
AAAGGATAAAAAGTAGCATAGGGAGTGGTTTACCATAACTGCAAGTAAATACCAAGCAT  
GTGCGAGCCTGTAGACATTGCCT

>2723

CCATGTTCTTCTTCTCAGTCTTATGGTCATTGCTACTTTGAAGGCAGAAAGGATAAAAAG  
TAGCATAGGGAGTGGTTTACCATAACTGCAAGTAAATACCAAGCATGTGCGAGCCTGTA  
GACATTGCCTGCTATTGGGGAA

>2724

TTATGGTCATTGCTACTTTGAAGGCAGAAAGGATAAAAAGTAGCATAGGGAGTGGTTTAC  
CATAACTGCAAGTAAATACCAAGCATGTGCGAGCCTGTAGACATTGCCTGCTATTGGGG  
AAAGACGGAGTTAGCTGGGGAA

>2725

AGAAAGGATAAAAAGTAGCATAGGGAGTGGTTTACCATAACTGCAAGTAAATACCAAGC  
ATGTGCGAGCCTGTAGACATTGCCTGCTATTGGGGAAAGACGGAGTTAGCTGGGGAAA  
TACATCAGTCTTCACTCCCAGCAC

>2726

ACCATAACTGCAAGTAAATACCAAGCATGTGCGAGCCTGTAGACATTGCCTGCTATTGG  
GGAAAGACGGAGTTAGCTGGGGAAATACATCAGTCTTCACTCCCAGCACCCAAGATGT  
AACATTTCTTACTCTTCTGGA

>2727

CAAGCATGTGCGAGCCTGTAGACATTGCCTGCTATTGGGGAAAGACGGAGTTAGCTGG  
GGAAATACATCAGTCTTCACTCCCAGCACCCAAGATGTAAACATTTCTTACTCTTCTG  
GATCAGGCTATCTCTGCTTTGCC

>2728

TTGCCTGCTATTGGGGAAAGACGGAGTTAGCTGGGGAAATACATCAGTCTTCACTCCC  
AGCACCCAAGATGTAAACATTTCTTACTCTTCTGGATCAGGCTATCTCTGCTTTGCCTT  
TTCTTTACCTACCTCCTTCTT

>2729

GATCAGGCTATCTCTGCTTTGCCTTTTCTTTACCTACCTCCTTCTTTTCATGGCAGGAAG  
GGAAAGGAAAGTACCCCAAGCAGCCAGCAGTCAGCACTGGGGCCTCTAGGGAAGA  
GTGGATTGGTGTGTTTTGCTGTG

>2730

GCCTTTTCTTTACCTACCTCCTTCTTTTCATGGCAGGAAGGGAAAGGAAAGTACCCCA  
AAGCAGCCAGCAGTCAGCACTGGGGCCTCTAGGGAAGAGTGGATTGGTGTGTTTTGCT  
TGTGGTTTGCTGTGCGTTTTCCAG

>2731

TTCATGGCAGGAAGGGAAAGGAAAGTACCCCAAGCAGCCAGCAGTCAGCACTGGGG  
CCTCTAGGGAAGAGTGGATTGGTGTGTTTTGCTGTGGTTTGCTGTGCGTTTTCCAGAA  
TCTCTTGGATGACTATCAGATT

>2732

AAAGTACCCCAAGCAGCCAGCAGTCAGCACTGGGGCCTCTAGGGAAGAGTGGATTG  
GTGTTGTTTTGCTGTGGTTTGCTGTGCGTTTTCCAGAATCTCTTGGATGACTATCAGA  
TTCAGTGAAGGGATGGACCTTCA

>2733

GTACCCCAAGCAGCCAGCAGTCAGCACTGGGGCCTCTAGGGAAGAGTGGATTGGTG  
TTGTTTTGCTGTGGTTTGCTGTGCGTTTTCCAGAATCTCTTGGATGACTATCAGATTC  
AGTGAAGGGATGGACCTCAGGA

>2734

CAAGCAGCCAGCAGTCAGCACTGGGGCCTCTAGGGAAGAGTGGATTGGTGTGTTTTG

CTGTGGTTTGTCTGTGCGTTTTCCAGAATCTCTCTTGGATGACTATCAGATTCAGTGAAG  
GGATGGACCTTCAGGAAGCTGAG

>2735

GGATTGGTGTGTTTTGCTGTGGTTTGTCTGTGCGTTTTCCAGAATCTCTCTTGGATGACT  
ATCAGATTCAGTGAAGGGATGGACCTTCAGGAAGCTGAGAGATAGGAGATCCTGTGGC  
CTGGGAACCCAGAGGCCTGGGC

>2736

ATCTCTTGGATGACTATCAGATTCAGTGAAGGGATGGACCTTCAGGAAGCTGAGAG  
ATAGGAGATCCTGTGGCCTGGGAACCCAGAGGCCTGGGCCCTGGGAACAACCTACCA  
CAGGACTCAGCCTGCGAAATAGGAA

>2737

GGCCTGGGAACCCAGAGGCCTGGGCCCTGGGAACAACCTACCACAGGACTCAGCCTG  
CGAAATAGGAAACGTCATTGTAGCTTCTGCATCATGTTTTCCATGTTCCACTGGAAAAC  
CATCTGTAAATGGACATAGACCA

>2738

GGAACCCAGAGGCCTGGGCCCTGGGAACAACCTACCACAGGACTCAGCCTGCGAAAT  
AGGAAACGTCATTGTAGCTTCTGCATCATGTTTTCCATGTTCCACTGGAAAACCATCTG  
TTAAATGGACATAGACCAATTCTT

>2739

GGCCCTGGGAACAACCTACCACAGGACTCAGCCTGCGAAATAGGAAACGTCATTGTA  
GCTTCTGCATCATGTTTTCCATGTTCCACTGGAAAACCATCTGTAAATGGACATAGAC  
CAATTCTTGCTTTTCTTTCTG

>2740

AACAACCTACCACAGGACTCAGCCTGCGAAATAGGAAACGTCATTGTAGCTTCTGCAT  
CATGTTTTCCATGTTCCACTGGAAAACCATCTGTAAATGGACATAGACCAATTCTTGCT  
TTTCTTTCTTCTGGTACCAAAG

>2741

AGCCTGCGAAATAGGAAACGTCATTGTAGCTTCTGCATCATGTTTTCCATGTTCCACTG  
GAAAACCATCTGTAAATGGACATAGACCAATTCTTGCTTTTCTTCTTCTGGTACCAA  
AGAGAACGGTGGTGTCTTGT

>2742

GTTTTCCATGTTCCACTGGAAAACCATCTGTAAATGGACATAGACCAATTCTTGCTTTT  
CTTCTTTCTGGTACCAAAGAGAACGGTGGTGTCTTGTCTAGATGTTCTTGTAGG  
GGCACCAGAGTCATTGCAACC

>2743

CTGGAAAACCATCTGTAAATGGACATAGACCAATTCTTGCTTTTCTTCTTCTGGTACC  
AAAGAGAACGGTGGTGTCTTGTCTAGATGTTCTTGTAGGGGCACCAGAGTCAT  
TGCAACCATTTTGTAGTAAAGAT

>2744

ACATAGACCAATTCTTGCTTTTCTTCTTCTGGTACCAAAGAGAACGGTGGTGTCTCTT  
GTCATCTAGATGTTCTTGTAGGGGCACCAGAGTCATTGCAACCATTTTGTAGTAAAGATT  
GAGTCCACTGGGGCATCAGAAG

>2745

ACCAATTCTTGCTTTTCTTCTTCTGGTACCAAAGAGAACGGTGGTGTCTTGTCTCT  
AGATGTTCTTGTAGGGGCACCAGAGTCATTGCAACCATTTTGTAGTAAAGATTGAGTCC  
ACTGGGGCATCAGAAGGGGAGT

>2746

TTCTTCTTTCTGGTACCAAAGAGAACGGTGGTGTCTCTTGTTCATCTAGATGTTCTTGTA  
GGGGCACCAGAGTCATTGCAACCATTTTGAGTAAAGATTGAGTCCACTGGGGCATCAG  
AAGGGGAGTGTGTCATTGCTGTT

>2747

AGAGAACGGTGGTGTCTCTTGTTCATCTAGATGTTCTTGTAGGGGCACCAGAGTCATTGC  
AACCATTTTGAGTAAAGATTGAGTCCACTGGGGCATCAGAAGGGGAGTGTGTCATTGC  
TGTTGTTACCACACAGGCCGTGG

>2748

TTGTAGGGGCACCAGAGTCATTGCAACCATTTTGAGTAAAGATTGAGTCCACTGGGGC  
ATCAGAAGGGGAGTGTGTCATTGCTGTTGTTACCACACAGGCCGTGGTACTTGCCTTTT  
CCTGACCCATTTTGCAGAGCAGG

>2749

GTAGGGGCACCAGAGTCATTGCAACCATTTTGAGTAAAGATTGAGTCCACTGGGGCAT  
CAGAAGGGGAGTGTGTCATTGCTGTTGTTACCACACAGGCCGTGGTACTTGCCTTTTC  
CTGACCCATTTTGCAGAGCAGGCC

>2750

GTCATTGCAACCATTTTGAGTAAAGATTGAGTCCACTGGGGCATCAGAAGGGGAGTGT  
GTCATTGCTGTTGTTACCACACAGGCCGTGGTACTTGCCTTTTCTGACCCATTTTGCA  
GAGCAGGCCAGCTACTTAACCCC

>2751

GGTACTTGCCTTTTCTGACCCATTTTGCAGAGCAGGCCAGCTACTTAACCCCTCGCCA  
CCCACTCACCTGTGGAAGGCACATTTGCAAAACAATAGACCAGTTGGTAATTTGGCAC  
TTGTTAGGTAGACATAGTGGTAC

>2752

AGCAGGCCAGCTACTTAACCCCTCGCCACCCACTCACCTGTGGAAGGCACATTTGCAA  
AACAATAGACCAGTTGGTAATTTGGCACTTGTAGGTAGACATAGTGGTACATTGAGGA  
AGTTCCTCCTGTTAACTAACCTA

>2753

GGCCAGCTACTTAACCCCTCGCCACCCACTCACCTGTGGAAGGCACATTTGCAAAACA  
ATAGACCAGTTGGTAATTTGGCACTTGTAGGTAGACATAGTGGTACATTGAGGAAGTT  
CCTCCTGTTAACTAACCTAGTTT

>2754

CTCACCTGTGGAAGGCACATTTGCAAAACAATAGACCAGTTGGTAATTTGGCACTTGT  
AGGTAGACATAGTGGTACATTGAGGAAGTTCCTCCTGTTAACTAACCTAGTTTTTCTTG  
CTGTAATCCGAATATACTTCTC

>2755

ACATTTGCAAAACAATAGACCAGTTGGTAATTTGGCACTTGTAGGTAGACATAGTGGT  
ACATTGAGGAAGTTCCTCCTGTTAACTAACCTAGTTTTTCTTGCTGTAATCCGAATATAC  
TTCTCTGATTTTTTGAAAAG

>2756

AAACAATAGACCAGTTGGTAATTTGGCACTTGTAGGTAGACATAGTGGTACATTGAGG  
AAGTTCCTCCTGTTAACTAACCTAGTTTTTCTTGCTGTAATCCGAATATACTTCTCTGATT  
TTTTGAAAAGCCTGTGAGT

>2757

GCACTTGTAGGTAGACATAGTGGTACATTGAGGAAGTTCCTCCTGTTAACTAACCTAG

TTTTCTTGCTGTAATCCGAATATACTTCTCTGATTTTTTGAAAAAGCCTGTGAGTGGAG  
CCTGGCTCGACAGCCCAAAAC

>2758

CCTCTGTAACTAACCTAGTTTTCTTGCTGTAATCCGAATATACTTCTCTGATTTTTG  
AAAAAGCCTGTGAGTGGAGCCTGGCTCGACAGCCCAAAACGCTGAATTAATTCTGTCT  
CTCTCTCTCTCTTTTTTTTT

>2759

CTGTAACTAACCTAGTTTTCTTGCTGTAATCCGAATATACTTCTCTGATTTTTGAAAA  
AGCCTGTGAGTGGAGCCTGGCTCGACAGCCCAAAACGCTGAATTAATTCTGTCTCTCT  
CTCTCTCTTTTTTTTTTTTT

>2760

CTTCTGATTTTTTGAAAAAGCCTGTGAGTGGAGCCTGGCTCGACAGCCCAAAACGC  
TGAATTAATTCTGTCTCTCTCTCTCTTTTTTTTTTTGAGACGTGGAGTCTCGCTCT  
GTCACCCAGGCTGGAATGCGC

>2761

GCCTGGCTCGACAGCCCAAAACGCTGAATTAATTCTGTCTCTCTCTCTCTTTTTTT  
TTTTTGAGACGTGGAGTCTCGCTCTGTCACCCAGGCTGGAATGCGCTGGCAGCATCTC  
GGCTCACTGCAACTTCCACCTC

>2762

AGTCTCGCTCTGTCACCCAGGCTGGAATGCGCTGGCAGCATCTCGGCTCACTGCAACT  
TCCACCTCTGGGTCCAAGCAATTCTCTGCCTCAGCCTCCAAGTAGCTGGGACTAC  
AGGCATTGCCACTACGCCAGCTA

>2763

TGGCAGCATCTCGGCTCACTGCAACTTCCACCTCCTGGGTCCAAGCAATTCTCCTGCCT  
CAGCCTCCAAGTAGCTGGGACTACAGGCATTGCCACTACGCCAGCTAATTTTTGTAT  
TTTTAATAGAGACGGGGTTTCG

>2764

GCAATTCTCCTGCCTCAGCCTCCAAGTAGCTGGGACTACAGGCATTGCCACTACGCC  
AGCTAATTTTTGTATTTTTAATAGAGACGGGGTTTCGCCGTGTTGGCCAGGCTGGTCTC  
AAACTCCTGATCTCAGGTGATC

>2765

TCCAAGTAGCTGGGACTACAGGCATTGCCACTACGCCAGCTAATTTTTGTATTTTTAA  
TAGAGACGGGGTTTCGCCGTGTTGGCCAGGCTGGTCTCAAACCTCTGATCTCAGGTGA  
TCCACCAGCCTTGGCATCCCAA

>2766

CATTGCCACTACGCCAGCTAATTTTTGTATTTTTAATAGAGACGGGGTTTCGCCGTGTT  
GGCCAGGCTGGTCTCAAACCTCTGATCTCAGGTGATCCACCAGCCTTGGCATCCCAA  
ATGCTGGGACTGCAGGAATGAG

>2767

ATTTTTGTATTTTTAATAGAGACGGGGTTTCGCCGTGTTGGCCAGGCTGGTCTCAAAC  
CCTGATCTCAGGTGATCCACCAGCCTTGGCATCCCAAATGCTGGGACTGCAGGAATG  
AGCCACCGCGCCCGACCAATTC

>2768

CACCAGCCTTGGCATCCCAAATGCTGGGACTGCAGGAATGAGCCACCGCGCCCGAC  
CCAATTCTTGAGTGACATGCTGAGTGGGGCTGCTTTTTGGTGGAGGTAACAAAAA  
AGAGTTGAGGTATTGATTTAGTTT

>2769

CATCCAAAATGCTGGGACTGCAGGAATGAGCCACCGCGCCCGACCCAATTCTCTTGA  
GTGACATGCTGAGTGGGGCTGCTTTTTGGTGGAGGTAACAAAAAAGAGTTGAGGTAT  
TGATTTTAGTTTCATTTGAGACAG

>2770

GACTGCAGGAATGAGCCACCGCGCCCGACCCAATTCTCTTGAGTGACATGCTGAGTGG  
GGCTGCTTTTTGGTGGAGGTAACAAAAAAGAGTTGAGGTATTGATTTAGTTTCATT  
GAGACAGCGATCTGTCCCCTCCC

>2771

AGGAATGAGCCACCGCGCCCGACCCAATTCTCTTGAGTGACATGCTGAGTGGGGCTGC  
TTTTTGGTGGAGGTAACAAAAAAGAGTTGAGGTATTGATTTAGTTTCATTTGAGACA  
GCGATCTGTCCCCTCCCTGAGTT

>2772

GCGCCCGACCCAATTCTCTTGAGTGACATGCTGAGTGGGGCTGCTTTTTGGTGGAGGT  
AACAAAAAAGAGTTGAGGTATTGATTTAGTTTCATTTGAGACAGCGATCTGTCCCCT  
CCCTGAGTTCCTCGTTTGTGTTG

>2773

TTGAGTGACATGCTGAGTGGGGCTGCTTTTTGGTGGAGGTAACAAAAAAGAGTTGA  
GGTATTGATTTAGTTTCATTTGAGACAGCGATCTGTCCCCTCCCTGAGTTCCTCGTTT  
GTTTGAAACTGCTTAAATGAAC

>2774

CTGCTTTTTGGTGGAGGTAACAAAAAAGAGTTGAGGTATTGATTTAGTTTCATTTGA  
GACAGCGATCTGTCCCCTCCCTGAGTTCCTCGTTTGTGTTGAAACTGCTTAAATGAAC  
TTTTTCCCCTGTTCCCTCATCA

>2775

GAGGTAACAAAAAAGAGTTGAGGTATTGATTTAGTTTCATTTGAGACAGCGATCTGT  
CCCCTCCCTGAGTTCCTCGTTTGTGTTGAAACTGCTTAAATGAACTTTTCCCCTGTT  
CTCCATCACTCTGCTGTTCTC

>2776

AAAAAAGAGTTGAGGTATTGATTTAGTTTCATTTGAGACAGCGATCTGTCCCCTCCC  
TGAGTTCCTCGTTTGTGTTGAAACTGCTTAAATGAACTTTTCCCCTGTTCCCTCATCA  
CTCTGCTGTTCTTCTCCTC

>2777

AGACAGCGATCTGTCCCCTCCCTGAGTTCCTCGTTTGTGTTGAAACTGCTTAAATGAA  
CTTTTTCCCCTGTTCCCTCATCACTCTGCTGTTCTTCTCCTCCTTATCCTAACAGTC  
TCATAGGTAAACTTAGAAGG

>2778

CCCTGAGTTCCTCGTTTGTGTTGAAACTGCTTAAATGAACTTTTCCCCTGTTCCCTCCA  
TCACTCTGCTGTTCTTCTCCTCCTTATCCTAACAGTCTCATAGGTAAACTTAGAAG  
GAAGACAAATACTTACAAAT

>2779

TGCTTAAATGAACTTTTCCCCTGTTCCCTCATCACTCTGCTGTTCTTCTCCTCCTCTT  
ATCCTAACAGTCTCATAGGTAAACTTAGAAGGAAGACAAATACTTACAAATTGTCACCG  
AGGGTACCATAAAAAGAGACA

>2780

TTCTTCTCCTCCTTATCCTAACAGTCTCATAGGTAAACTTAGAAGGAAGACAAAT

ACTTACAAATTGTCACCGAGGGTACCATAAAAGAGACATTTGGACAGTAGTTCTGGGG  
AGATCCTTGTCTTTGCTTCATGT

>2781

CTCCTCTTATCCTAACAGTCTCATAGGTAAACTTAGAAGGAAGACAAATACTTACAAAT  
TGTCACCGAGGGTACCATAAAAGAGACATTTGGACAGTAGTTCTGGGGAGATCCTTGT  
CTTTGCTTCATGTTAATACAGAG

>2782

GGTAAACTTAGAAGGAAGACAAATACTTACAAATTGTCACCGAGGGTACCATAAAAGA  
GACATTTGGACAGTAGTTCTGGGGAGATCCTTGTCTTTGCTTCATGTTAATACAGAGGG  
ATTGGGGTAGCCCAGATCACCAG

>2783

AAACTTAGAAGGAAGACAAATACTTACAAATTGTCACCGAGGGTACCATAAAAGAGAC  
ATTTGGACAGTAGTTCTGGGGAGATCCTTGTCTTTGCTTCATGTTAATACAGAGGGATT  
GGGGTAGCCCAGATCACCAGGGG

>2784

AAATACTTACAAATTGTCACCGAGGGTACCATAAAAGAGACATTTGGACAGTAGTTCTG  
GGGAGATCCTTGTCTTTGCTTCATGTTAATACAGAGGGATTGGGGTAGCCCAGATCACC  
AGGGGAAAGTGGTTTTTCTTCA

>2785

AAAGAGACATTTGGACAGTAGTTCTGGGGAGATCCTTGTCTTTGCTTCATGTTAATACA  
GAGGGATTGGGGTAGCCCAGATCACCAGGGGAAAGTGGTTTTTCTTCATTTAGCTTTTA  
ATTGCTTTCTTCACTTTTATG

>2786

CTGGGGAGATCCTTGTCTTTGCTTCATGTTAATACAGAGGGATTGGGGTAGCCCAGATC  
ACCAGGGGAAAGTGGTTTTTCTTCATTTAGCTTTTAATTGCTTTCTTCACTTTTATGTAT  
AAAAGATTGTCCATTTAATT

>2787

GGGAGATCCTTGTCTTTGCTTCATGTTAATACAGAGGGATTGGGGTAGCCCAGATCACC  
AGGGGAAAGTGGTTTTTCTTCATTTAGCTTTTAATTGCTTTCTTCACTTTTATGTATAAA  
AGATTGTCCATTTAATTAAC

>2788

GGTAGCCCAGATCACCAGGGGAAAGTGGTTTTTCTTCATTTAGCTTTTAATTGCTTTCTT  
TCACTTTTATGTATAAAAGATTGTCCATTTAATTAACTCAAGAATGCAATTTCAAAAACA  
CTAATGCTTTACACATGACG

>2789

CACCAGGGGAAAGTGGTTTTTCTTCATTTAGCTTTTAATTGCTTTCTTCACTTTTATGTA  
TAAAAGATTGTCCATTTAATTAACTCAAGAATGCAATTTCAAAAACACTAATGCTTTAC  
ACATGACGGCTTTTAAAATA

>2790

CATTTAATTAACTCAAGAATGCAATTTCAAAAACACTAATGCTTTACACATGACGGCTT  
TTAAAATAAAAGTAGCATTCTAATATTGCATAATGCTTTTCTATCCCCTTCTCTCCCGC  
GTTCACCCCACCCCTCCAG

>2791

TGACGGCTTTTAAAATAAAAGTAGCATTCTAATATTGCATAATGCTTTTCTATCCCCTTCC  
TCTCCCGCGTTACCCCCACCCCTCCAGACTGTATTAACCTTTTCATAGCGGAGGGTTG  
TTAGGAGGAAAACGCTGTTT

>2792

GCATTCTAATATTGCATAATGCTTTTCTATCCCCTTCTCTCCCCGCGTTCACCCCCACCC  
CTCCAGACTGTATTAACCTTTTCATAGCGGAGGGTTGTTAGGAGGAAAACGCTGTTCTG  
GATGGTGCCTCTCTGCCTCTC

>2793

TTTCTATCCCCTTCTCTCCCCGCGTTCACCCCCACCCCTCCAGACTGTATTAACCTTTC  
ATAGCGGAGGGTTGTTAGGAGGAAAACGCTGTTCTGGATGGTGCCTCTCTGCCTCTCC  
TCCCACCAACCAAGTACAGCA

>2794

CTATCCCCTTCTCTCCCCGCGTTCACCCCCACCCCTCCAGACTGTATTAACCTTTCATA  
GCGGAGGGTTGTTAGGAGGAAAACGCTGTTCTGGATGGTGCCTCTCTGCCTCTCCTTC  
CCACCAACCAAGTACAGCAGCA

>2795

CCGCGTTCACCCCCACCCCTCCAGACTGTATTAACCTTTCATAGCGGAGGGTTGTTAGG  
AGGAAAACGCTGTTCTGGATGGTGCCTCTCTGCCTCTCCTTCCCACCAACCAAGTACA  
GCAGCACGACAGCCGCAGGCCTT

>2796

AGCGGAGGGTTGTTAGGAGGAAAACGCTGTTCTGGATGGTGCCTCTCTGCCTCTCCTT  
CCCACCAACCAAGTACAGCAGCACGACAGCCGCAGGCCTTCTGAAGTGTCCGTAG  
CTTCTGTAAGAAAGAGACTACTCAT

>2797

GATGGTGCCTCTCTGCCTCTCCTTCCCACCAACCAAGTACAGCAGCACGACAGCCGCA  
GGCCTTCTGAAGTGTCCGTAGCTTCTGTAAGAAAGAGACTACTCATCCCTTCCCCCT  
TGCCCGTTTCATGCCTATATTT

>2798

CTCTCCTTCCCACCAACCAAGTACAGCAGCACGACAGCCGCAGGCCTTCTGAAGTGT  
TCCGTAGCTTCTGTAAGAAAGAGACTACTCATCCCTTCCCCCTTGCCCGTTTCATGCC  
TATATTTACCCTCTTTTGGGGGT

>2799

CCGCAGGCCTTCTGAAGTGTCCGTAGCTTCTGTAAGAAAGAGACTACTCATCCCTTC  
CCCCTTGCCCGTTTCATGCCTATATTTACCCTCTTTTGGGGGTCACTGTGGCTCCTACT  
CCCATTGCTGCCTTTAAGAA

>2800

CTGTAAGAAAGAGACTACTCATCCCTTCCCCCTTGCCCGTTTCATGCCTATATTTACCC  
TCTTTTGGGGGTCACTGTGGCTCCTACTCCATTGCTGCCTTTAAGAAGCATCATTATG  
ATGGATTACATGGGAAAATT

**Online Supporting Information  $S_2^+$  represents the positive dataset composed of 2880 true splice acceptor site sequences.**

>1

GGCCAGGGGCATAGAGCTGGCCAAGGAGCCATGGCTCACTAACGTGTTGTATGGGGCT  
CCTTCCCTTCAGGTCCAGGCTCCTGCGTGAAGTGATGCTCCTCTTTGCCTTACTCCTAG  
CCATGGAGCTCCCATTGGTGGCA

>2



GAGTGAGCTGGTAATGGGTGGAAAAGGCGTAGTGGAGCAGAAGCCTGAAGCCTGCTT  
TCTCCCCTCTCAGGGACTTACAGTTTGAGATGCCATGACTGTGCGGTCATAAATGACTT  
CAACTGTCCCAACATTAGAGTATG

>3

TGTATGTGCCTCAATATTTACAAGCAGAAAATGTGAAATCAATTATTTTCATTGCTGCTT  
CTTTTTTTAGGCATAAATTCTCGTGAACACTTGTTTATAAGAACTGTACAAACAAGTGC  
ACATTTGTATATGCAGCTGA

>4

GTAGGGCTCAGCTCCGCCCTGTCACTACAGCTGGGGACACACCACACTGCCCGACT  
TCTCCTCCCCAGGTGGGCGCTCCTCGCCAAAAAAGGCTACCAGGAGCGGGACCTGGA  
ACCCAGTTTTCCATCATCACAAA

>5

AGGCTGCCGGCTCCGGCCTTTCCAGTCAACACGAGCCCAGCCAGGCCAACCTTGAG  
ACTTGCTCCTAGGGAGAGAACGTGTTCTTCTTGGTGACCAACTTCTTGTGACGCCA  
GCCCAAGTTCAGGGCAGATGCCAG

>6

CCTTTGAGACTGGGCTGTGGAGGGGAGACATCCCCTGTGCCATTGGTGACTGCTCTCT  
CTCCACCTCAGCACCCGTCCGTCCACTGGCTAACTGCTGGGTCGACGAGGACTGCC  
CCGAAGGGGAGGGAGGCACACACA

>7

ACCCCTGGCTGAAGGCCTCCCAGGCCTGCAGAGATTTGAAGGTCTGGAGTTCATCT  
TTTGTCTTAGGTGTAAAAACAGGCCAGTGTGTGGTGTCAATGGGACCCACAGGAC  
CTGTGAGATCTGGAGTTGGTGCCC

>8

ACAATCCCCTACCCCAACTGGCGCAGGGCCCCAGGCCTGGCAGAGGCTGTCACCTCCC  
TTCCACCTGCAGGAGGCCCTGTGGCCAGGCCCAGAAGTTCACACTGTTTCATCAA  
AACACAGTACCTTCAGCAAGTTC

>9

AGAGTGGGTCTCATCTGCCCAAGACCCTCCTGTCCCCTACCTCATCTGACCTTCCC  
ACTCCTCCCAGGTCCAATGCCTTGGAGACCTGGGACCCACCTATTTAAGCACTGCC  
GCTATGAACCACAATTCAGCCCC

>10

GGTTCCTAGAGGGCTCTGGGAGAGGGTCCCGGGCCACCCACCGGTGGAAAAGCTAT  
GTGCTATGTGCAGGGTGGCTCTGTAGGCATCAGAGTTCAGTGGGATTGTGACCTGGAC  
ACCGGGGACTCTGGCTGCTGGCCTC

>11

GGTCTGGCAGGGCCAGCCCCACCTGGGGGTGGGCAAAGCAGGTCACCAGAGCCTTCT  
TTCTGCCACAGGACAGCCACTCACTGGTGGGAGCAACCGGTGTGGAGGCCCGCA  
CCCTGCTCAAGCTCTATGGAATCCGC

>12

GTGCAGGCTGGGGAGGTGGCAGGAAAGCAGGCTCGGGGGCTGGAACATGGGTTGGC  
CCTGCCTCTCCAGGTCACCTTTTTCTGTGACCTGCTACTGCTGTATGTGGATAGAGAA  
GCCCATTTCTACTGGAGGACAAAGT

>13

TTGGACCCTGGGTCTGCCACACTTAGGAAGATGTTGGCTGGATCCCTGACCTGCTGTC  
CTCATCTGCAGGCCAAGGCCCGAAAGCAACCGCCAAGTCTGTGTGGAGGGAGCTGG

CCCTTGCATCCCAAGCCCGACTGG

>14

GAGGTTGTGGCCTCGGGTCGGCGTCTGAGGACCCGCTGACGCTCCGGTGCCCTCCGT  
CCTCTCTACAGCGTGTGAGCTACGTGGCGGGCATCGCCTGGTTCTTGGCGCTGGTTT  
TCCCGCCGCTGACCCAGCGCACT

>15

GGGCGTATGGGGCGAGCAGTGGTGGCTAAGGCCGGGGAGCTCTGCTCAGAGGCTCCC  
TTCGTGTCTGCAGGGCTCTGCCAGTGGCCTGGCTTGAACGGACGATGCGGTGAGTAGG  
GCTGGAGGTCTACACGCAGAGTTTC

>16

GTTGTGGGGGGCCCTTCAGCCCCCTACCACAAAGTTACTGAGGCTCCCCCACC  
TGCTGCATACAGATGGTGTGGGGACCAACGTGTACGGCATCCTGCGGGCCCCGCGT  
CTGCCAGCACCGAGTCGCTTGTGC

>17

TCAGGGCTGCTGGCCGTGGAGGGGTTTGGTCAAGTGGCCAGACCCTGCTGATCCTGCT  
TCTGGCCTCCAGGGCAGATTTATTGGGCCAAAGATATCGTCTTCTGGTAACAGAACAT  
GACCTTCTGGGCACTGAGGCTTG

>18

CCTGGTCCCCCTCTCAGGGTCACTGTCTCACCACGTCCTCCATTAGCACTCATTCACT  
TGCTCCTACAGGCATGCAGTCGTCTCCCTGCAGGGCCGAGCTGGGGCCATTCAGGCA  
GCCGTGGCCCTGGAGCTGAGCAG

>19

GCCTGCCTGAGGGCTGAAGGGCACAGGGTCTGTGGGAGGGGCTGTCTATCCTGTCT  
GCACCTTAAAGCTGCAGCCCCGAGGACTGGACATCATTGGATGGACCGCTGCAGGGCC  
TGCAGACACTGCTGCTCATGGTTC

>20

TCTAGCTGGAGCGGAGTGGGGGATGGCCTGGTGGCTCTGGCCAGCCGTGAACCTGCC  
CCACACCTGACAGGGCTTTGGAGGGCATGTTCCGCAAGCTCAACCACCTCCTGGAGC  
GCCTGCACCAGTCCTTCTCCTCTAC

>21

TGGGATGGTGGTGGTCTTTGGGGATCCCCTGGCCCCAGGGTCCATCTCCAAGAGCCTG  
TGTGCCCTGCAGGGTGTGGGGCTGGCCTCGCTCGTGGCACCTCTGCTGATCTCACAGG  
CCATGGGACTGGCCCTCTATGTCC

>22

GGGGCAGGGGTAGAGGTCCCCTGGACATGCAGACAGCTTGTGGGTTGCCTCTGAGTC  
CTTTGTCTTACAGGGTGGTAAGCACACAGGCCCCAGACAGGGGCTGGATGGCACTGA  
AGCTGGTAGCCCTGATCTACCTAGCA

>23

AGCCCTTCCCCAACCTGGTGGCCATGCCCCACCATGGAGCCTACCTTGATGTTGCT  
TCTCCACCCAGGACCCTCTATGCTGCCCTGCTGGTGGTACCAGCCCGGCAGCCACGC  
TCCTTGGCAGCCTGTTCCCTGTGG

>24

AGGTTCCCGGCTTGATGGGGCCAGGATGGGGCTCCTGGGTGCAGTCAGAGTCCCACC  
TCCCTCCCCTAGGAAGTGCATCGGGCAGGCGTTCGCGATGGCGGAGATGAAGGTGGTC  
CTGGGGCTCACGCTGCTGGCCTTC

>25

GGGGGCGCAGGACCCGGAAGCCGCGCCTGGAGGAGGGTCGGGCGGGTCTCAGCCA  
CTCCTCGCCCCAGGCTCCCACTCCATGAGGTATTTCTACACCTCCGTGTCCCGGCCCG  
GCCGCGGGGAGCCCCGCTTCATCGC

>26

AAAATCCCCCGGGTTGGTCGGGGCGGGGCGGGGCTCGGGGGACCGGGCTGACCTCG  
GGGTCCGGGCCAGGTTCTCACACCATCCAGAGGATGTATGGCTGCGACGTGGGGCCGG  
ACGGGCGCTTCCTCCGCGGGTACCA

>27

CCACATGTGTGCTGGAGGAGTGTCCCATGACAGATGCAAAATGCCTGAATGTTCTGAC  
TCTTCTGACAGACGCCCCAAGACGCATATGACTCACCACGCTGTCTCTGACCATGA  
GGCCACCCTGAGGTGCTGGGCCCT

>28

TTAATACATAAAAAAAAAAACCCGCTAGGTTTCCATGTGCTACTCACATGTTGCTTTTG  
GCATTCTCAGGAAAATACAAGTATATTACTTAGTCTTAGATGTGCAAGAATCGGAC  
TGTTCCGGTCCTATCCAGGAAAT

>29

CTTTCATATCTGACCTGAGGAAGGCAGGATGCAATGACTCAGCAAGTCCTCAAGAGCC  
TCTTTCTTACAGGTGATCGGACAATGTAAGGTAATAGCTACAAGACATTCCCATGAATC  
TCAGGACCTCAGAGTGATTGACT

>30

CATTCTTGCCACCAAGCCACCATTAACATTTCCAGCCCTTACTGTGACACTGCTATCTT  
CTTTCTCAGTCTCTTACGACTGGCCAATACCAAAGATAGTCCGGTCTCATAGATTT  
CTTTGAGGATACTGAGCGCTA

>31

AGTTATCTACTGCTTTTTTTTCTTTTTCTTTGTCTGTTCTTGAAACTATTTTGATCCCAT  
CTGTTCTAGAGAGGAGGGGAAGGAACTGGTTACTTCGTGGACTTCTCTGTGCGGAACT  
GCCCCAGACACCATTTCCCCA

>32

AAGCTAACTCTGGCTGGTCATCTTACACCACCTGGACACACACACTAACAGCTCCTC  
ATTCTTTGTAGGTCTTTGGATTCTGCAGAGCAGATTTGTTCTATGATGTAGAAGCCTTG  
GACTTGAAAGCCCCGAAAACC

>33

ATCAAGTCAAGTATCTAACATCTTCTTTATGTTACATGATGATAGGCACTTTTCTGTGA  
CCTTTTCCAGGAACATGAGAACATCAATGGTGTACCGCCTCATTTGGGACATCCCTTCC  
ACTGGGGTGGGCATGAGCGTT

>34

GGCGTGGGCACAGGTCAAGCTGAAAGTCCCCGCCAGGTATCCAAGTGTCCGCTGTGT  
CCGCTCCCCAGGTGCAGGGCGCCGCGCACTTCGGGCCGGTGTGGCTAGCCAGCTTTG  
GGACAGTGCACACCGTGTACGTGG

>35

CCTTCACTGCAGCCAGTCCCGTCGAGCCGTCCCCACCTTCCCGATGCGCACTCTCTCCT  
CAACCCTGCAGGGAAGGCGAAGAATGGCAAAGGCTCCGCAGTCTCCTGGCCCCGCTC  
CTCCTCCGGCCTCAAGCGGCCGCC

>36

GAGCTGGGCAGGCGTCGGGGCGCCCTACCAGAGCCTCCCGAACCTGACGGCGCC  
CCCTCCCGACGAGGCATCGCCGCGTCTGCTCGGCTCGCGCTTGGGCTGCCTGGAGG

CTCAAGTGCCACCCGACACGGAGAC

>37

GAGGTGGAAATGGGGGAATGTAAAGCTGTCCAGGGGTAGCGAGGTATTCACGTGCCTT  
CTACCCACGCAGCTCAGAGGCACGTGGAGCGGCGAGAGGCAGAGGCAGCCATGAGG  
AACGGAGGACAGCCCGAGAAGGACCT

>38

TCTTCCATAATCTGCACCCTCTGCTGGGTCTCACACCCAACACCTCTTTGCTTTCACA  
TGTTTTTCAGGTGTCCAACACGCTCTTTGGGCTCTGTATGAGCTCTCCCGCACCCCG  
AAGTCCAGACAGCACTCCACT

>39

GAAACAATGAGAAGGGGGCTGCAGCCCCTAGCCTCATCTTGTTGTCTCCATTTTGTGCT  
TTGCAACCTAGACTGTACCCTGTGGTACCTGGAAATTCTCGTGTCCAGACAAAGACA  
TTCATGTGGGTGACTATATTATC

>40

TGAATATCCTCTTCTTCATGCCTGCCCTATTCTGAGCCCAAAGTCAAGTTTGTTC  
TTTGACCCAGACGCTGGTCACTCTGTGTCACTATGCCACTTCAAGGGACCCTGCCAG  
TTCCCAGAGCCAAATTCTTTTC

>41

ATTGGATTACCAATGAATCCCCCATTATAGATATCTTTCATAGTAATGCTCACCTTCTTC  
CCTTTCCAGATCCTAACACATTTTGAGGTGCAGCCTGAGCCAGGTGCGGCCCCAGTTA  
GACCCAAGACCCGGACTGTCC

>42

GCTCTCTCACTTGATGTAGACCCATTTGAATGAATCTCCTTTTGCTTCTCTTTCTTAAT  
ATTTTTCAGGTACGAGCAGGTGATAATAAATATATGCACTTGAAAGTATTCAAAAGTCTT  
CCCGGACAAAATGAGGACT

>43

GACTGGGATTAGGGGTGGGGTGGTGGTCCCAGGGGCATGCTCAGTGGTTCTTTTTTC  
TCTGGGGCACAGGCTCTGGGCGTGGGGAGGCTGAGACACGGGAGTGCATCTACTACA  
ACGCCAACTGGGAGCTGGAGCGCAC

>44

TGGCAGGGCAGGCCTGGGGGAGTCTTGCATCCCCAGGTGAGGGGTATATGGAAAATT  
CTGTGCCTCCAGGCAGGAGTGTGTGGCCACTGAGGAGAACCCCGAGGTGACTTCTGC  
TGCTGTGAAGGCAACTTCTGCAAC

>45

CCCTGTATTCTGGCTCTGGAAGTGTGAGGGTGGGCAGACTGTTTGACACAGGGCTCTG  
TGTGTCCCCCAGTCACGTACGAGCCACCCCGACAGCCCCACCCTGCTCACGGTGCT  
GGCCTACTACTGCTGCCATCGG

>46

TGGCTTGGGGCAGGGCAGGATAGAGGTGGGGAGGACAGGCCAGACCTTTTTAACCTT  
TGCTCTCCCCAGGACCCTGGGCCTCCACCACCATCCCCTCTGGTGGGCCTGAAGCCA  
CTGCAGCTGCTGGAGATCAAGGCTC

>47

GTAGGGCAATGTGACTGCAGCAGGGGTAAGCCAGCCACTTGTCCCCCAACCCCTCGC  
CCCCGGCCTCAGGACAAGCAGTTCGTGGCAGAGTGAACGGGAGATCTTCAGCACACCT  
GGCATGAAGCACGAGAACCCTGCTAC

>48

TGCCAGGGCTGGGCTGGGTCCTGTCTGTACCCAGAATCTGTGCTCAAGTTCTGTGCC  
GTCTTCTCTCAGGGCTCCCTCACGGATTACCTCAAGGGGAACATCATCACATGGAACG  
AACTGTGTCATGTAGCAGAGACGA

>49

GTATCTTGGGAACCAAGGTGGGAGTTGGATCATGATGTTAAGCTTTATCTCTGCCCACT  
TGTTTCCACAGGGACTTTAAAAGTAAGAATGTATTGCTGAAGAGCGACCTCACAGCCG  
TGCTGGCTGACTTTGGCTTGGCT

>50

AACTCCCATGTCCAGCTGTGTGTGTATGGCCAGTCACTGTAAATCCTGCCCTCCTCTG  
TCCTCACATAGGTAGGCACGAGACGGTACATGGCTCCTGAGGTGCTCGAGGGAGCCAT  
CAACTCCAGAGAGATGCCTTCC

>51

CATCCTAGATTGAGTGATAGGGAGCAGTGGGACCTTAGAGTGATCCTGCCAGGCTCTCT  
CTTTCTCCTAGGACCCGTGGATGAGTACATGCTGCCCTTGAGGAAGAGATTGGCCAG  
CACCTTCGTTGGAGGAGCTGCA

>52

TCCCCAAAGCTTTTCTCACTGAAGGGTCCTAACAAAGGTGTCTTCTGTCTGCCCT  
ATGCTGCTTAGGGCCTGGCCAGCTTTGTGTGACCATCGAGGATTGCTGGGACCATGAT  
GCAGAGGCTCGCTTGCCGCGG

>53

TGTGTTAAGAGGGCATCTGCTGGGAAACGATTTGAGGAGAAGGTACTAAATTGCTTGG  
TATTTCCGTAGGAACCCAGAGCGAAATACAGTTTGCAAAGATGTCCAGATGGGTT  
CTTCTCAAATGAGACGTCATCTAA

>54

TTTGTATTGAATAGACTCTCAGAAATCCAATTGTTGAGTAAATCTTCTGGGTTTTCTAAC  
CTTTCTTTAGATGTTACCCTGTGTGAGGAGGCATTCTCAGGTTTGCTGTTCTACAAA  
GTTTACGCCTAACTGGCTTAG

>55

GCTTGTTTTATGATGGCATTGGATGAATATAAATGATGTGAACACTTATCTGGGCTTTTG  
CTTTATGCAGATATTGACCTCTGTGAAAACAGCGTGCAGCGGCACATTGGACATGCTAA  
CCTCACCTTCGAGCAGCTTCG

>56

GAGAATTTATACCAAGCGTATTCTGAGTTTACTCACTTTCTCCACAATGTTTCCTTTTTT  
CCTTGAACAGGAAAAAAAAAAGAAGATGGGTTTTTTAAGTCCAATATATGTTATTTTC  
TTCTTTTTTGGAGTCAAAGTA

>57

ACATAGAATTATGGCTATAACTATGGATTATACTATAATACAAGATTAATTTTTAATTTATT  
TCTTTAGAGATGAATCTTACAGTGATGTGCCTTCTATTGACCCACTACATTACCACCA  
TTTAACATACATTCTGTGT

>58

AAAGGGACCAGGAGCAGCTGGCTTGCCTTGTGAACAATGACTTGGGATCTTTCTGTCC  
TGCTCTTGCAAGTTGGTACCAACAAAGAGCTCTGCTGCCTCGTCTATACCTCCTGGCAG  
ATTCCACAAAAGTTCATAGTTGA

>59

AAGGACGCAGGGGCCACAGGATTCCCCTGATGAATTCGTCAGTTCTTAACTCTTCTCC  
CTTCTCCACAGCCTCCTAACCAAGAGAGGCCGGCAGATCTGTGCTGACCCCAATAAGA

AGTGGGTCCAGAAATACATCAGC

>60

GCGCTGAGTGGGGCGTGTGGATGTCCCTGAGCCCAAGTGACAGAGCCTCCCCTCCCTC  
GTGCTGCTGCAGGGCACGGCCCCACCCGGAGGCTGCGAGGCTTGGGGGTCTGGCCG  
GGGTGGCTCTGCTCGCTGCCCTCTG

>61

TTCTGAGTCTGCATGCTAGAGCCGCTTTCTGCTGCTTCTATTAATACAGCATTTTCACTT  
TGTCTCTCAGGGTTTATGGTCCAGCAGAGTCTCAGAGCGGGTCTTTGGAGATGTGTG  
CCCCTACTCACTTCTCTCTTG

>62

GAAAATTTTTCTGGAATCTTCTTGGCACCCACGTGTGTTTTGCTGGACTGAATCTGCT  
CTGAATTTTAGGTACAATGTTTGTGTTATGGCGTATGGACAGACGGGCAGCGGAAAGA  
GCTATACCATGCTGGGACGCCAT

>63

TATGATTGGCTTACTGAAAATCACTCTGTGAGACTTTCTGTAAGTTTCTTGTGTGT  
TTCCCGCAGGCTCATTTTGGAAAATACCTCAAGAAGCCCAAAGGTTGAAGTCTCCAT  
AGTGGAAGTTTACAATAATGAC

>64

AGTCTTGAAGTCGCCTTAGGTAAGGGGGCCGCCCTCACTGTGTTCCCCACTGCTTG  
CCTTGTCTGTAGGGCTGTCCGCAGCGCCTCGAAACTGATGGAGCTCGTTCATGGAGGT  
CTGCAGCTCAGGGCGAAGCACCCC

>65

CTGAGGCAAAGCACAGCCTCATGGCTTCATGCAACTGTTTTCTCCTCGTCGCTCCTTG  
GTCCCTTGACAGACCAAGCCTGCAGTGCCACCCTCCCCAGGGAGCAAACAGAGGC  
AGGAAGGGCAGGAAGGAGCCGCAG

>66

GGAGCCGGTTTTGCTTTTCTGCCTCCTTTCTTGGTGCAAACGGTGATGGTGCGTGGCG  
GTCCTGTCCAGGTGTGTCTGGAGTGACCGGGTTGGCCCTGAGGGAGATGGCGTGCATC  
AGCCGCAGCCTTGCGGCCCTGGC

>67

GCATTTCTGTTCCAGATGATCAATTTCCACTGCTACGTTGTTTTGTTTTGTTTTTTCC  
TCCCTTAGACTGCAAATGGAAATGTGGAGGCAAAGGTTGTCTGTCTTTCCGGCGCA  
GGGACATTTCTAGTAGCCTCA

>68

GTTAGAGTTTCCAGGGTGGTGTGTTTTGCTGGATCCATTTCTGACTTGGTTTCTTCTCTT  
AATCTCCAGGGGAGTTTGAAGAGGAATCAAAGCAGCCAGGGGTGTCTGAGCAGCAG  
CGCCATCAACTGAAGCACCGGA

>69

CAGATACACCTCCCTCCCTGCCGCTATGTGGATTGCTGCCTTGCTTACCTTGCTCTCC  
CCAATTCAGGACTGCTTTTTTACTCACTGGTGTGTTGACCCCGTGCAGAAGACTTC  
TCGCTGATCAGGGCGAGATTA

>70

TTGTGAATGAAAAGACACCAACTGTTCCCCCTGCCCTCTCCCTGTTGATGCCATTGTT  
CTTTTCCCAGGAGAATCTGATAATCGGAACCAGCAGAAGATGGAGATGAAGGTCTGG  
GACCCAGACAACCCTCTCACAGA

>71

GGCTTAATTTCCAGCCCACTTGGGCTTTTGACTTTTCTTCGCTTTTACTTCTCAATT  
TCTCCCTTAGAGCTGTGGGAACCTTTGCAAGAGCCCTAGATTGTAGCAGCTCCATTTCGG  
CAGCCAAGCTTGACATGAGT

>72

GTTTTAAGGAGCAGGAAGGGAGTGGTGCCAAAAGTTTCAGGTCCTCAGTTGCTCTCCA  
TCTTCCCATAGTTTCACGCCATGGATACCTTGCAAAGGAACGGCTACGACCTGGCTAA  
GGCCATGTCGACCCTGGTACCCC

>73

GATGACAGGTGAGGGAACAGGACCTGGGGCCAGATGCCAGCTCATTCTTCCTCCCTC  
TGCCCCCTTAGCTACCCTGGAAGTCACTTGCCAGCATAGTCCAGTTTTATTACATGTG  
GAAAACCACAGACCGGTATATTC

>74

AGAGTGGAATGATTCTTTTCCTTGACCAGTTTCTTGTTTTTTCCCTTCTCCTCGCCT  
TCCCCGTTAGACTAAGCCAAACCCTAACAGATCATTTCTGTGGTTCAAACCTGGC  
ATGAATGGGGCTGGATTCAG

>75

GTGGCTCAAGAATCTGAGGGGCTTAGGTAGTATGCTTCTTCCTGTCCCCCTCCTCTCC  
GTACTCTACAGCCACACAGTCTGCTCAGTGGTATGCCTGGGGCCACCTAACATGCAG  
TGCCGCCTCTGTGCTTCTGTTG

>76

GGGAATGGAAGAAAGAAGGGAGCCTCAGTGCTGATTTCTGCTCTCTCTTTCTATG  
CTCTTCTTAGGAGCCACACTCAAGGGGTCATTTATCCAGACCTGAAGCTCAAAGTCT  
CTCTCCTTACACAACCAGCGCCA

>77

AGTTGGCTTCTGGCCTTAGAGGAGACCTGAATGGTGAAGCCCTCAGAAGCTTCTTC  
TTTGTCTCCAGGCTCCATTCGACTTCTAAGGCCGCAAGACTCCATTGAAGATTCAC  
CCTCTGGTGCGGCTGCCCCTGGC

>78

AGAGAGATGGAAGTAACAAAGGGGAACTGCGTGGAAGAAAAGGTGCGAAAGTTTT  
CTGTTTTTTCCAGTGGCCCAGGCACCCCTGAAACCAAAAACACCTCGGGGTACCAAG  
ACACCGATCAACAGAAACCAGCTGTC

>79

TGGGCTTTTGTCTCTCATAGGAGTCTGAGAGGGTCCCTTCCCTCATTGTGCCATCCTAC  
CCTTTTCCAGATGGCAGGGGCAGGGGTTCTTTCTCTGCCAATGGAAGGCCTCTGGC  
TTCAGGGATTGTTCAAGCTCAC

>80

GTGGGGCTTACCTGGAGGTCTTAATGTTCTCTAAGCCTTTTCTGTTTCCACTTGCTCT  
TTCTGGCCAGGGCCCTACGGAAGGCTCTGACCCATCTGAAATGCGGCGAGCTGCTCG  
CCGACCCAACCTGCCCCTGAAG

>81

TATGTGTGTGTTGTTGACATGTGTATGTGTCTATCAACTTATCTTTTTTAAAAAAAAT  
TTATCTCAGGAGAACCATACAGACTTTTGACTGGCGTTGAGTACGTTGTTGGAAGGAA  
AAACTGTGCCATTCTGATTGA

>82

GAAAACCTTTTCTCTGAGAAGTGAATGTACTGAGTGGTAAAAGACTTTAAATTATTTGC  
TAACTTTTCAGAGTCAAACAGATGAAATCCCTGTATTGACATTAAGATAATTCTAAG

TATGGTACCTTTGTTAATGAGG

>83

TAAAGTACTAAAAATTGCCATCTCTGCAACTCTGATACTATGACTTTATTTAACTTATTCT  
CATTTACAGAATAGAGTATGAGCCTTTGGTTGCATGCTCTTCTTTAGATGTCTCTGG  
GAAAACCTGCTTTAAATCAA

>84

TAACTTAAAACCTTTTCTTTAAAAAATGCTAGCATGTGAATATATATATTACATGTTTTCT  
TCATTGTAGACAATATGTGCACTCATTGTGGACGTCCAATTGTAAAGCCAGAATATTTT  
ACTGAATTCCTGAAAGCAG

>85

TCACTCCGTTTACAATTTAATAGCAAACATAGTAGTATATAATTAGAATATACTTTAATTAT  
TTTTACAGTTTTTACCCACCTCTTGATGAACCATCTATTGGAAGTAAAAATGTTGATCTG  
TCAGGACGGCAGGAAAGA

>86

CAAATCAAATTCCTATGTGTTCAAAAAATTACTACATTTTACTTTAAAAAATGTTTCCTT  
CCATTTTTAGCATAAGAAATTGAGTTCGCAGTTGTCTTTGGAGGTGGGGAAGCTAGGT  
TGATAACAGAAGAGAATGAAG

>87

CTTGACATTATCTGAATAAAAGTTGCTAGTTTTAATATATTATCATACTTAACTATTTTAT  
TCTAATAGGCAAGGTCTTAGACCTATTCCTGAAGCAGAAATTGGATTGGCGGTGATTTT  
CATGACTACAAAGAATTAC

>88

TTTAAGTGACCAGATGTTTCATCTTCTATCTAGCAGTTGTGATTCTTTCTTTCTACTTGTGT  
GATTTACAGGATTAAGACAACAACCTCCAGGACCAAGCCTTTCACAAGGCGTGTGCGT  
TGATGAAAAACTAATGCCAAG

>89

GATCTTTGTTTCTCTATTAAGTTGCTGTAACTTGATTATTTACCTTGCATTCTTTTCTT  
TTTCTACAGGGATTTGAGTGAAAGGCCAAAAGAAATCAAAGTCTCCAAAATGGAACA  
AAAATTCAGAATGCTTTCACAA

>90

GCCAACTAAATGGTTACTTAGCTGTGTTTCATTTTCTTGTTTTGTTTTCTTCTTTTTTTTT  
AAATCTAAGGGAAAGGGATGAAGAAAATCAAGAAATGTCTTCATGCAAATCAGCAAG  
AATAGAAACGTCTTGTTCTCTT

>91

CCCAAATGACAAGTGACTTTTCTTTGTTATTTCTTCTCTTTCTTACCTATCCATCTTAACC  
CCATTTAAGAACAATGACAACTCAGGATGATAGTGAGATGCTTCCAAAAAAGCTGT  
TATTGACTGAATTTAGATCAC

>92

AATCTTTTTAAAAAATGGTCATTTTTGTTTGTAAATATGATTTACTGTACTACTTTTATTA  
TTCAATAGGTCACATATCCTGGAGCAGGAAAACTTCCACACATCATTGGAGGATCAGAT  
CTAATAGCTCATCATGCTC

>93

AGTTCCTTACCTTTAAAAGAAATACCATCCCTTATCTAAATATCATTTAACCCATTTCTT  
TCTTTGCAGATACAATCCTTATTTAAAAAGGAGAAGATAACTGAGGATTTTAAAAGAA  
GCCATGGAAAAACTTCTAG

>94



CCTTTCCCGCTCCGCCTCCCCTCGCTAGGCTGCCGCCTCCTCCCCATCACCGCTCCCC  
TCGCCCTGCAGGCAAGCTGTCCTTGAGGAGTTCATCCGCGGGGCCAAAAGCGACCC  
GTCCATCGTGCGTCTGCTGCAGTG

>95

ACAAACTGCTGGTTCTGAACTTGTTAGTTTGTTCCTAATTCTTCTCCCTCACTTTTC  
TCCTTTCCAGAATCATATTCTAAGAACTCAGCCACTCAGGTATCCACCATGGTGCTGGG  
TCCTGAACAGAAGATGTCAGA

>96

ATACTAAGGATGAATTGTTAGTGATTTTTGTTTCATTTTTACTAATTTATTTTCAAATCTGT  
TAATTCAGACAGTGGTTCTGGAGATCATGGGGAGTCTGCCAGTCTTGGTAACATCAACC  
CTGCCTATAGTAATCCCTC

>97

GATAACAGACCAATTATATCAGTAGTTCAATGGTGATGTTCAAGTTAATCTCTTTTCCTC  
TCTTGACAGTACTCTGTTTTAGCTTTCGTAAACTCTGGGCTTTCACCGGACCAGGTT  
TTCTTATGAGCATTGCCTACC

>98

CAACTAAACAAACAAACAGACAAAACTCAGTTGTTCAATGAGTGTTACAGGAGATTT  
TGTTCTTCTTAGTTGCTCTGGATCCTTCTGTTGGCCACCCTGTGGGGCTGCTGCTCCA  
GCGGCTTGACAGCTAGACTGGGAG

>99

TTCCAAATTGTGGAGGAATTTTTAGAAATGATTAATCAGAACCGTGTCTTTCTACTGTT  
TGATGTTTAGGTCCCACGAGTCATCCTGTGGCTGATGGTGGAGTTGGCTATCATCGGCT  
CAGACATGCAAGAAGTCATTG

>100

GGAAGAGAGTGTTTTTCAATGTTTCCTTTCTTTCCGTCTCTGACTTCCATATCTCATC  
TCTGACCTAGAATTCCTCTGTGGGGTGGCGTTCTCATCACCATTGCAGATACTTTTGAT  
TTCTCTTCTTGGACAAATAT

>101

GTTCCCTGGTACTATGTTACTCCCCTTTCACGTTCTGTAAAGGCTAATCATTGTTATGT  
TGGTATGTAGTATGTTACAGTGAAACCCAGCCAGAGCCAGGTAATCAAGGGCATGTTT  
GTACCATCCTGTTCAAGGCTGTC

>102

AACTCCTGAAATGTCACAAGGAACTTGTCTAACTGGTCAAAAAGTGACTGCTGTTG  
TTATCTTTCTAGTCTAGACAGGTAAACCGGAACAATAAGCAGGAAGTTCGAGAAGCCA  
ATAAGTACTTTTTATTGAATCCT

>103

ATGTAGGAGAGCTCTTATTTGGTCCTTGCTTCTGAAACAAAAGTTGCTGTTGAATTGCT  
TTGGGTTCTAGGTTGAAGTCTGTACAAATACCAGCAGTCTCATGCTGGCCTCTTTCCT  
AAAGATAACTCGACTGGCTG

>104

AACTGCTGTTTTGGATATTGTCTGAGCAGATTATTGCCACAATCATATCCTTCTTGG  
CCTCTCACAGGGTGTGTGCTGGGATGTTACTTTGGCCTGCTGCACTCTACATTTGGG  
CAGTGGGGATCCTGGCTGCAG

>105

CCTGAACCTCCCCAAAACCTTTTTTTGTTTCTGTTGCAGACAGTCATCTGCTCCTATGT  
TTTCTTCCAGGGATCCTGAACCTAAAGTGGTCACGCTTTGCCGAGTGGTTCTGACTC

GCTCTATTGCCATCATCCCCA

>106

TTAATTGTGCTGTTCTCTAGGGTGATAACAAGGACCCATAGTAATCCCATCTGATCTTCTT  
TCTTTTCCAGCTTCCCTTTGCTCTCATACCCATCCTCACATTTACGAGCTTGC GGCCAGT  
AATGAGTGACTTTGCCAATG

>107

TCCTGTTTCCTTTTCTGTCTGTGGCCAAGTTGGATTATTCCATCAGTGACTGTGCTGATT  
TCTTTTACAGAGGCTGGCGGATTGCAGGAGGAATCTTGGTCCTTATCATCTGTTCCATC  
AATATGACTTTGTAGTGTT

>108

GGGAGCTAGCCTGTGACAGTGTTTCAGCCCCCTTAATAGTAGGTGTATCTGAGTGTGG  
ATTTCTCCTAGCCTCAACTTTCAGGAGACCCGTCGGTGGCCTATTTATTCCACCCCTCC  
TGACATCGTAGCGAATCAAT

>109

GAATCCTCCTCCCGCTGACCTCTGCCCTCCTATGTCCACAGCCTCTCAACTCAGCTGT  
TTGCTCTCCAGGTACCCCTGGGATGGCGTGAGCACTCCCCAGCGATGGACCCATCTG  
TGACGCTGTGGCAGTTTCTGCTG

>110

GTGGCCACAGGAGAATCCTGTGGTCCCAACAATCCTTACACACCCTCTTGTGCCTG  
CTCCTCTACCAGGTCATCCTGACCCCGCCCGAGGCCCAAACCTGAAATCGGAAGAGC  
TTAATGTGGAGCCGGTTTGGGCC

>111

GACCAAGTCCCTTCCAGCATCCACATCTACTTTCTACTCACTTGAGCTCCGACCAACC  
TCTCCCCACAGACCCCGGTGCTGCTGACACCCAGCTCGCTGCCTCCTAGCATTCACTTC  
TGGAGCACCCCTGAGTCCCATTG

>112

GTGGTGCCACTGCCATGTGCTGCCCGAATGTGGGCCACTGACCCGCTCCTATCGCC  
CATTGCCCCAGGTGGTGCAAAGGATCAAGGCTGTGGAGGGCAGACTCGGCTGCTG  
GTGGTGGACCAGGAGACAGATGAGG

>113

ACCACCGGGGAGTGGCCTCTGGAGGGCGGGAGGCTGGAGCAAGAGACTGACCCTGTCC  
GTTGGGCCTGCAGGATGTCAGTGGGCCCTGAGGGAGCTGCGCCCTCGGCTCTGCCAC  
CTGCGAAAGGGACCTCAGGGCTATG

>114

CACACCTGGCCACGCGGCGTTGGGGGCTGTCTGGGCCATGGCGGGGCTGATACATGC  
TGGTGGCGGCAGGTGAACGGGCAGAATGTGGAGGGACTGCGCCATGCTGAGGTGGTG  
GCCAGCATCAAGGCACGGGAGGACG

>115

GGAGGGGCCACCGTCTGGGGTGTGGGACTAGGGCTCACTCCAGACACCCCAACCACC  
GTGCTACCCCAGGATGGCAGTGCCTGGAAGCAAGATCCCTTCCAGGAGAGCGGCCT  
CCACCTGAGCCCCACGGCGGCCGAGG

>116

GTTGGATGGGCAGAGCCTGGGAGAAATGTTTTCTGAATGGCCTGGGGCTGGCATTAT  
CTTTCCTTTCAGCAAGCACCTCAAATTTGCCATGCTGGCTGGTGGAAAGAGTTTGTGGTA  
GCAGAAGAGTGCTCTCCATGCTC

>117

TGAATGGCAGCCTTTTTGTTTATCCTGTTGCCCTTCCTAACATGTACTTTGCTCCTTTTC  
TCCTGGCAGAAAACCTACCCTGAGTGTGGTCCCACAGGATATGTAGAGAAAATCACAT  
GCAGCTCATCTAAGAGAAATG

>118

AGTAGAAGGGAAATTAGAGGGAGAAGCTGTCTGGCCTTCCTTGGGAATAACTATTCTT  
TCCTGCCCTCAGCTGCCGCTCAGCTTTGATGGAACAACGCTTATTTTGGAAAGTTCGAAG  
GGGCTGTCGTGTGTGGCCCTG

>119

TCCAGGATGCCTTTGCTTTAAAACCTTTTAAAAGAAGTGAATGATACACCCCTTTGC  
TCATCTTGACAGTGGAACTGGTGTGTGAGGACGACTGGAAGGCCCACTCACAATCTC  
CTTGTTCTTCGTGGGTGTGCTGT

>120

CCCACTTGGTGGAGCCATTCTGCTGCCCTTTCCAGCTGGTTATCTGTCACTCTCCTT  
TTCTTCCCAGGTTTGGCCGGAAGAATGTGCTGTTCTGTGACCATGGGCATGCAGACAGG  
CTTCAGCTTCTGCAGATCTTC

>121

ATACCATAAAAAATTAATAAGGAAGGAACCCAAATTAAGTGAAGTGAAGTGAAGTGAAGT  
GTTTTGAACAGGGACAGAAATCTTGGCAAGTCAGTTCGTATAATATTCTCTACGTTAG  
GAGTGTGCATATTTTATGCATT

>122

GTGCTCTACCTGGTCTGTGGGTCTGCTGTTGGCAGGGAGGCCTCACTGAGATTGGACC  
TTGTAAGTCCAGGTTTCCCTGAGTCCCCCGATGGCTCATCTCTCAGGGACGATTTG  
AAGAGGCAGAGGTGATCATCCGC

>123

GTATGTTATTGTGTGCTCTGAGTCTCTGACCACCTCTTCTCCATACACTTATGATGTT  
GTTCTGACAGTTACAAGACCTAAGTCCAAGAAGCAGCAGTCCCACAACATTCTGGAT  
CTGCTTCGAACCTGGAATATCC

>124

TGAAAAGTTGTACAGGTTGGGAAAGATGTGGATACTGCTTTTCCAGCTTTCTTCTGCA  
CTCTGTTTCCAGGATGACCATATCAGTGGGCTATTTGGGCTTTGCTTGATACTCCTAAC  
TTGCATGGGGACATCTTTGTG

>125

TGTTTTGCTCTCAATAGCTGCATGCCATGGGTTGGTACCTACTCCTACCCTCTTTCTTT  
GCTTCTCCAGACTTGTATTATTTGGCTACAGTCCCTGGTGTGGTGGGCAAGTTGGAGT  
CACGGCTGCCTTTTCCATGGT

>126

ATAAAGGGGTAGATGAGAGACCAAGTCTAACTGCAGCCCTGGGCCTGAGGCTCCGTCT  
GCTTTGCCATAGGTGCCTACGACCGTCTCCTGCCCTACATTCTCATGGGAAGTCTGACC  
ATCCTGACAGCCATCCTCACCTT

>127

TTGTTTGTGGAGACTGGGAGGCATCTTTTTAAAATGTGTTACTGACATATTTTGTCTT  
GTTTTTATAGAATGAAACACAGAAAACTCCAAGTACACAAGGATGTTAAAAGATGG  
TCAAGAAAGGCCCAATCCTT

>128

TGCAATGTAAGTTTTCTCACATACACAGTTACAATCCTCCCTTATCAGCTCTACATTTT  
TTTTAATAGACTGAATCTCGCTCTGTTGCCAGCCATCTCGGCCCACTGAAACCTCCA

CCTCCCGGGTTCAAGCGATT

>129

ATGAAAACCTTTGTTGAATTAATACCTTTGTTGTGTTTTATTCACTGTATATAACAATACC  
TGGATGAAGAGAGATATTTTGGAGCACTATTAATAATCATGCATTGGCTCAATACATGAAT  
TGGATCAATTCTGGAACCC

>130

CTTCTCTTTCTCTCACCTAATTCAACCTATTGCCAAGTATTGTACATTCTCCATGCTTAA  
AATCTCTAGGCGGTGTCCCTGAAGTATAATCAAAGCCTTCATGCCTGTAATCCGAGT  
GCTTTAGGAGGCCAAGGCAG

>131

ATAGTTAGAAAATAGAATTTAATGTTCTTTTCTCGATGAATTAATTTGTTTGTCTTCCAT  
TTTTAAAAGCATGCTGATCCCATTTTCAATGAAGAATTGCTTCCAGTTACTTTGTAAGT  
CCAGGTCCCAGCAGCTGGC

>132

GTACCCGAGCCCGGGAGAAAGTGTTCAGTTGACCCAGGCTGAGTGTGTTATCACCTG  
TTTCATTTCCAGCCATGCCTTGTGTTGAGGCGCAGTATGGTCTCGCTCAAGGAGCC  
AGCCCCGCTTCTCAGAGCTACAG

>133

ACGTGGCGTCTGACGTCTCCAGGGAGACCCGCCCTCGCTGCCGCCTCACCGCGCT  
TCTGTTTTGCAGGTAATCTTCAGCAAGTACTGCAACTCCAGCGACATCATGGACCTGT  
CTGCATCGCCACCGGCCTGCCTC

>134

ATGTGTACATTCAAGTGTACATCCCAGAGCACACTATGGGCGAAAACACGGGCTTGGG  
TGTGTTTTCCAGGAACACGACCATCTCCCTGCTGACCACCGACGACCCATGGTCTCC  
ATCGACCCACCATGCCCGCAAT

>135

ATAAAATAGACCTGGACACTAAGAGGAACTTCCCATATTTGGAAACCCAGTCCTGCC  
TGCTTTTTATAGCTGGTGTGCGAGGACAAGAGAACCACAAGCCGTGGCCAGTCTGCTGA  
GAGACCACTGAGGGACAGACGGGT

>136

TGCTTAACCGGTTTTGGCTCTGAGAATTTAAGGGTCATATTTACTCTCTTTTTCTTTTT  
CATTCTAGAGCATCAAATCAATGAACTGAAAGCTGAAGTTGCAAATCACTTGGCT  
GTCCTAGAGAAACGCGTGGAA

>137

TTACCAGCCTTGAGAGATCCTCCACATTCGTCCGTGGTAACCCCTTGCTGTCTCTCTC  
TCTGTCAACAGTGAAGGACTAAAAGTGGTGGAGATTGAGAAATGCAAGAGTGACAT  
TAAGAAGATGAGGGAGGAGCTGGC

>138

TTTGCTGTGCTGAGGGCTTACCAGACTGAAACAGCAGGACCACAGCTCATCTCTGCT  
CCTTCTCTAGGACCAACTGCCCTGTAAGTACAGTTTTTTGGATAACCACAAGAAGT  
TGACTCCTCGACGCGATGTTCCC

>139

TATCTCAGCATGCACATCACTGTACAGGCCACGGCGCCTGGTTAACACGGAATCC  
TGTCCTTTCTAGTACCTGCTCTCTCCAGAGACCATCGAGGCCCTGCGGAAGCCGACCTT  
TGACGTCTGGCTTTGGGAGCCCA

>140

GGAAGGAAGCCAGGGGCTGGGGAGCCGGCCACACAACCTGCCAGTGCCTATCCTTCT  
CCTGTGCCACAGATGCTGAGCTGCCTGGAGCACATGTACCACGACCTCGGGCTGGTC  
AGGGACTTCAGCATCAACCCTGTCA

>141

CTGGGTGGCTTTGGGAGGAGAGGTGGGCGGGCCAGGCACAGGGTGA CTGGACCCC  
CTGCCTCCCGCAGTTCTGCGTCCACGACAACCTACAGAAACAACCCCTTCCACAACCTC  
CGGCACTGCTTCTGCGTGGCCAGA

>142

CACCCCCCTCACCCATCCACCCTCCGAGTGAAGAGAGCAAACACCTACGCCCTGT  
TTTCCAATCCAGGAGAAGTTCTCACAAACGGATATCCTGATCCTAATGACAGCGGCCAT  
CTGCCACGATCTGGACCATCCCG

>143

GTGTTGCTCCCCGTGCAGGTACCTGGTGAGGGCGCCTGAGTCTCCCCTACTCTCTC  
CTTGCTCCAGGTACCAGATCAATGCCCGCACAGAGCTGGCGGTCCGCTACAATGAC  
ATCTACCGCTGGAGAACCACCAC

>144

CACAGTAGGCCTCCGCTGAATAATTGTTTCACTATACCCGTGTTAACACGTTGTTCTC  
TCGCTATTTAGGGAATGATCACATTAATCTTGCCACTGACATGGCAAGACATGCAGAA  
ATTATGGATTCTTTCAAAGAGA

>145

AGACCCGAGCAGCAGCAGCAGGCCCGTGTCTACCTCCTGTTACCTCAATCCAAAAT  
CTCTTCTTTTCACTGAAGATGATTTTGATAAAATGCTGTGATATCTTAACGAGGTCCGT  
CCAATGGAAGTCGCAGAGCCTT

>146

CTCTGAGAACAGCGATCTGGTTATGGGGCATTCTGTCTCTAATGTCACTGTCTGCTGC  
ATTCCCTGCAGAGCGACCGTGAGAAGTCAGAAGGCCTTCTGTGGCACCGTTCATGGA  
CCGAGACAAAGTGACCAAGGCCA

>147

TGTTTTTCTCCGACGTTTCCATTGCCTTAAGAACGAGGGACTCTGAATAAATCCGTGT  
GTCTCTCCAGCTCTTCCCATGGTTGAGGAGATCATGCTGCAGCCACTTTGGGAATCC  
CGAGATCGCTACGAGGAGCTGA

>148

TGGGAGAGAGGCAGACTCCCCTGCTGTCTCCTGCTCCCTGACTTGGCCTTCTCTGT  
ACTCTGTTCCAGTTACAGAAGAAGACTGACAGCTTGACGTCTGGGGCCACCGAGAAG  
TCCAGAGAGAGAAGCAGAGATGTGA

>149

GATTAAAGGTGTGAGCCACCGCGCCTAATTCTAACAAAAACAATCAGTCATCGTTTC  
CCTTCTTCCAGGAGACTGTGCCTGAGGAAAGCGGGGGCGTGGCTGCAGTTCTGGAC  
GGGCTGGCCGAGCTGCGCGGGATC

>150

TCCAGTAGCAAACCCCCAGCAGGCCACTTTCCTTATTTATCACTAAAGCCCACATTAA  
CCTTGTTACAGGACAAGAGGGAGAAAGTTGTCTGAGAACTTTTACTGTGGCCCTGG  
ACTTTGCTGTGCTCGTCATTTTTG

>151

TGAGTCTACATATGCCAGCTGAATCTCTGTGCGGAAGAAACCCTGAAGCTTCTGTGT  
CTGTATTTAGGGAGGAGATTGGACAGGCTGGACTCCCCATTGCTTTTCTAAAAATCTT

GGAAACTTTGTCCTTCATTGAA

>152

TGTACCCGAGCCCGGGAGAAAGTGTTCAGTTGACCAGGCTGAGTGTGTTATCACCCCTG  
TTTCATTTCCAGCCATGCCTTGTGTTCAGGCGCAGTATGGGTCTCGCTCAAGGAGCC  
AGCCCCGCTTCTCAGAGCTACAG

>153

AATTTTCTCCGAGTTGCCTGATTTTCAAAGAAGAAAAAATGTTGGTCTATATTGTC  
TCCTTTTGCAGCGCACAGTGCAAAAAAATGCAAAATACGTGTGTTTAGCAAATAAAAA  
CTGCCAGTGGACAAGCGTCGCC

>154

GGGGAGGGACCGAGGCAGCAGCTGGGCCTGGGCTCGGAAAAGCGGCGCTAACAGGG  
CTCTTCTTTGCAGTGGTTCGCACAGACAGTTTAAAAGCCGGAGAGGTCGTTTGCCC  
TCGAAACCGAAGAGCCACAGGAGCC

>155

GGGGTTAGCAATTTACGGGTTATATATTTTAGAGAACCTCATTAAGTGCTTTTAAAAT  
GAAATTCAGTTCCAGGCGAACCTGACTATCAAATGAGTGGAGATGACACCCAGCAT  
ATCCAGCAATTCTATGATCTCC

>156

TCAAGTAATTAGTTGTTTAGCTTTTCTCTCTCTTTTCTCCCCTCTCTCTTTGGTAT  
TAATTGCAGGTCCAACCCAGTGGAGGGTAAACTCATCTTTGCAATGGGGTGGTCTTG  
CACAGGTTGCAATGCGTTCGT

>157

CTCCTTGGTTTTGCCAACTAGCTAACTGTCTGTACATTCTCTTTTGTCTGATTATGT  
TTTCTGCAGAGAGACACGGGCTCAAGGAACCCAAGAGAGTGAAGAAGTCAAAAAC  
AAGATTGTAAATTGTCTCAAAGA

>158

TTCCACGGGGGCTGTAAGATGGCTTTTTAGGATTGGTCTAATCAGATACTCATTCTTTT  
CTCTTTCTAGGTTTTGAAACATGAATCTTTCGCTCGTCTGGCTGCCTTTTGCTTGGGAA  
TAGCCTCCGCTGTTCCAAAA

>159

GCAAATCGGCTTGGTGAACATGGGTTGGGTAAGTAGACATAAAGTCCACCAGCTATATG  
TTTGCCTCTAGAATGAAGAAGGATGGAGGAGAGCAGTGTGGGAAAAGAATATGAAAA  
TGATTGAACTGCACAATGGGGAAT

>160

CTCTGTGCTGCTTCTCAGTTCTTACCAAATAGTCTTGCTTTAACATTTTATTTACTTC  
TCCTTGAAGACCAATGAAGAATTCAGGCAGATGATGGGTTGCTTTGAAACCAGAAAT  
TCAGGAAGGGGAAAGTGTTC

>161

AATTCAATTATGGGGTACTGTATTTGTATTGGTCTTGAAATTTACAGCTTTTTTTTCTC  
CCTTTTGTAGAACAGTGTGGTTCTTGTGGGCTTTTAGTGCAGTGGTCTTGAAGG  
ACAGATGTTCCGAAAACTG

>162

GGTTCTAGAACTAATGTTCCCGAGGAGGTAGATGGTAGTGATCAAGTCTCTCCCCCTT  
AACTTTAAAAGGATGAAATCTGTAAGTACAGACCTGAGAATTCTGTTGCTAATGACACT  
GGCTTACAGTGGTCGCACCTG

>163

GGTGGTAGGGTGGGTTACTGTACATGTCGCTTGGAGCTTCTCACCCCAGCATTAAATTT  
TACTCTCCCAGGCATTTATTTTGAACCAGACTGCAGCAGCAAAAACCTGGATCATGGTG  
TTCTGGTGGTTGGCTACGGCTT

>164

CTATTATTATAATGGAGCCAATTTTCCCTTGATTCTTGTATAAAATGGAAAACCTGCTC  
CTCTTTCAGCTGGGGTCCAGAATGGGGCTCGAATGGCTATGAAAAATAGCCAAAGAC  
AAGAACAACCACTGTGGAATC

>165

AAATATTTCTGCTTGAGCCATAAGCGGTGATTCAGAAATATGAAACCTGACAAGCTTTG  
TTTCTTTACAGGTCACCTGGATCTGAGAACTTCCCAGGGGACCGCATTCCAGAGTCAG  
TGA CTCTGTGAAGCACCCACATC

>166

CCCTGCATCTTGAGGAATGCTGTAACCTCCAGTCTGGCCTCTCACTTAGCTTCTCCTT  
CTGGCCCTCAGGGAGACAGACGATGCTCACCCAGTCAGTAAGAAGAGTCCAGCCTGG  
GAAGAAGAACCCAGCATCTTTGC

>167

GGTGAGAGGGAAAGGAGAACTGGAGCGCACCAGGATCACGGCTCCTCCGCAATTTGG  
CTATGTCTCTCAGGCCCTGGTGAGTGGACAACATTGTTCAACATCGACTACCCAGGCG  
GGAAGGGCGACTATGAGCGGCTGGA

>168

TCAGGGTCAGATTTCTGACAGAGTCCCCTCAAGAGGGAAATCAGACCGTCTGCTGAT  
CTCACTTTGCAGGATCCCTGCGCCGAGACACAGAGCGCATCTGGAGCCCATGGTCTCC  
CTGGAGCAAGTGCTCAGCTGCCTG

>169

CTAGGCTCTGTAGAACCTGTCACACACACACAAAAACCCAAAATGCTATCTCTCAT  
CTTCTGTCCCAGAGACTCCATACATGGTGATGAACCCTGAGACAAAAGCACGGAGAGC  
TGGGCAGAGCGTGTCTCTGTGCTG

>170

TCCTGGCACTTTTCTAGGAATACCTGCCCTCCCACTGCCATTAGGTTCTACCTCTCCA  
TCCCTTGCAAGTATCATAATGACACATTGCTGGATCCTTCCCTCTACAAGCATGAGAGC  
AAGCTGGTGCTGAGGAACTG

>171

GTGAGGTTGAGGTA CTCTTTGTGTAGGATGTAACTTACATCTTAATTTCCACACCATT  
CCCTACACAGCATCTGATGAGACTCCTTGCAACCCAGTTCTGAGAGCTATCTTATCCG  
GCTGCCCATGATTGCTTTCA

>172

CTTAAAAAATAAAATAAAGTAAAATACATTCAAGTCAACTGATTTGAGTCTCGAACTG  
CTCTGACACAGGAAGGTGCTGGGGATACATCAGAGGTGATGGATACTCAGGCGGGCTC  
CGTGGATGAAGAGAATGGCCGAC

>173

CTTTAAAAAAGAAAAAGAAGTGTGTGTGTTACAAGTTCACTAATTCGTATAATTTGG  
CTCTTCGGCAGATCCTGTCTACCTTTTCATGACCAACTACAGTTTTTCATTGCAACGTCTG  
CCATCACAGTGGGAATACCTAT

>174

ATCGAGTATTCCTTGGTAGTAGAGATGTAGTACTACAGATAACTGTTTCTTCTTTTTG  
TTTTTGATAGACTTGAAGGAAATGTGCCTTAGTGCTTTGGCCAACCTGACATGGCAGTC

CCGAACACAGGATGAACATCC

>175

GCTGTTTTCTTTCTTTGTCAGCATATCTTTGATTGCAGCAGTAATAGTCTTAATTTATTTT  
GAAAATTAGGATATTATACCATTTATTGATAAATACTGGGAGTGCATGACAACCAGACAG  
AGACCTGGGAAAATGACTT

>176

TGGTTGATTATTAATTCATACTTTTAAGTATAAAATGTTTCATTAATAGTAAAACACTACT  
TCTTTTTAGAGTAAAGAAAGAGATGTATTCTTGGTAAAGGAACACCCAGATCCAGGCA  
GTAAAGATCCAGAAGAAGATT

>177

TCTTGTTTTATGAGCATCCAGATTGACTGACTTACGTAGACTCCTTTTTTAATTGGATGTA  
TTTTTGCAGGACCTTAGTAACATTGGTCCTGCTTATGACAACCAAAAACAGAGCAGTG  
CTGTGTCTACTAGTGGGAATT

>178

TATGGAATTTCAAGTATCCACATGGTGTTCCTTGTGGCTCATTGAAAGCAATCTGCCTT  
CTCTTCAAAGGGGGAATTGCAGCAGGAAGCAGCGGAAAAGGACGAGGAGCCAAGCG  
CAAACAGCAGGATGGAGGGACCAC

>179

CTTACACAGTTGAATGCATTTGAGCTAAAGGGGGTTTTAGTTTTTGTATGTTATTTTTTC  
CTTTCTGCAGTGACCCTTTGTTTTCTGCTCAGCGCCTTCCCCCTCATGGCTACCCATTGG  
AACACCCGTTTAACAAAGAT

>180

GTTTTTGTGGCAATTGTCCCAAGAACCTCAAATAAGTTGCAGGCCTTCTTTAATCTC  
TGTCACCGCAGCTCCCAGTTAAAGATCTCAGATGACCGGCTGACTGTGGTTGGAGAG  
AAGGGCTACTCTATGGTGAGGGC

>181

CTTTTTCTTCAGCAAAGTAGATTTGACTTGCAATCTTCTGACTTCCTGTGTATGTTTTTA  
TTGGGACAGGAAACCTTCAAGCTCCTTTAGGTTATGATAAATTTAGCTATTCTTGGCGG  
AGCAAAAAGGGAACCAAGTT

>182

CGGATGCGTTTTTTTCATGATGATGGAGCTGATGCTTATTGTGCCTTTTTTTCTTTCTTG  
GTTTTCAAGGCTTTGATAAAATTCAGAGTTATTTGTATTTGAGGAAAAGACTTTGT  
GGATAAAGCAGAGAAGAGCC

>183

TTCTAGAGAGTTCTTTTTTTGTTTGTCTTTTTTACAGTTCTGAAGTAAAACCATGGTT  
TTTGTTTCAGATAATATTTTATAAAAATGGTGTCAATCAAGGTGTGGCTTACAAAGATAT  
TTTTGAGGGGGTTTACTTCC

>184

GGCTGCATGTGTCCTCAGCATCTCCGTGGCTGCTGTAGTCACCGTGTCTGTTTCTCATT  
CCTCCTGCAGATGAGTGACATGGGCTGGGGCGCCGTGGTAGAGCACACCCTGGCTGAC  
GTCTTGATCACGTGGAGACAG

>185

TAAGGGGTGAGTGATTTGAACCAGGCTGCACAAGGAGAATCAGTCTCATGCTCTGTGC  
CCCAGCTACCAGCTGGAAAAACACCAGAGAAGGAAGAGGATCACGCCCCGAGTTT  
ATTAAAGTCAGGGAAAACCTGCGGA

>186



GGCTTGTGGGAGGAATGAGTCCCTTTGGCAGGTTCTCGGGATCCCCTGGGTGACATGC  
CTTTCTCTGCAGGAGGCACCATGCAGGAGCTGCATCTGCTCTGGTGGGCGCTTCTCCT  
GGGCCTGGCTCAGGCCTGCCCTGA

>187

GGGTTATTATCTTCGCTGCCCCGCCGCCCTCCACGCCGGCCAGGCTGAAGTTGAC  
TCTGCCCCGAGGCCTCAAAGACTTCATATGCTCCAGATCTCCTACTTCGCGACCCCT  
ATCACGTGTGGTACCAGGGCGC

>188

CTTGGTGGGCCTCGCCCCACACCTGGCACCCCTCTCTGCACAGTCCCCTGATCCTGACT  
GTCTATCCACAGTTCTCTGACCATCCGCTGCTTCTGGGCTGTGAGCTGCCTCCCGAG  
GGCTCTAGAGCCCATGTCTTCTT

>189

TGGGGTTTACTCAAATCATGGACTCCTTGGGGGCCTATTCTTCGGGCTAACTTTTGC  
ATGTTCTGCAGGGAGCCAAACAAGCCGCTCCTACACTTCGCTGGTCTGGGCGTCTCTG  
GTGGGCAGTTTCATCATTGCTGG

>190

CCTGGGCAGCCTTGGGGGCTCCCTGGGGCCAGCTTCTGACACTTGCCCTACTCTGTG  
CTGCCCTGCAGGTGTCTGAGATGCTGCCACCGCAGAAGAAGCCCTGGGAGTCCATG  
GCTAAGGGGCTGGTGTGGGCGCGC

>191

CTCTAACTACCAGAGTCTGAGGGCCCCAGCACCCCTGAGGCTCTCCCCACCTCTC  
TGCCCCAGCAGGACCCCGAGGGCCGAGCGTCTGCTCTCCACCTGCACTCGAGCC  
AGAGGCAGTGATCCGGGCCAACGGC

>192

TGAGGGTCCAGGTTGGCTTCAGAAGTACTATCTTACTTCTTATTCTTTCCACCTCTTCC  
TTCATTCCAGGATCTAAGAGAAGAGGGAGATGAAGAGACTACAAATGATGTTCCCAT  
ATCCAGTGTGGAGATGGCTGTG

>193

AACTGGGTGAGTCTTCAGTGAATGGAGTAGGAAGAGGGTGTCTCTTTCATTGCTTTC  
TTTTCTCCCTAGTTCTGCTTGCAAAGGATCCACCAGGGTCTGATTTTTTATGAGAAGCT  
GCTAGGATCGGATATTTTCACAG

>194

GGTGTGAGAGACAGAGGGTTGGGGTTAAGGGTTAGAGTCTTCTCTGACTGTGTCCT  
ATGTCTTTTCAGCCTGAGGGTCACTGAGGACTCAGCAGATTCCAAGCCTCAGTC  
CCAGCCAGCCATGGCAGCGTCTCC

>195

GTGAAGCCAGCAGGTGCTCTGGAATTAACCAGCTTTCTGCAAGCCCTGCTTCTGCT  
CTCCCTCTCCAGGTAAGGCTGTGATCGAATTCTCAACCCTCAGAGACTTAGATCTC  
CACCTCACTCCCTCAGCCAAGCC

>196

TAGTGGCATGGCCTCCCTCTTACTCAGCTCTCCCTCCCTTTGACCGCTCCTCCTTTCCCA  
CTTCCATCAGTTCTGCAGTTGGCGGGCCAGCCCTTTGACCACTCCCCTATCCGCTTCTG  
TGCCCGCAACGGGGAGTATGT

>197

GAGCCTGGGAGGTGAGAAAAGGTGTGGGAAGCCGGGTCAAGCCATCTAACCTGCCCT  
CTCCCTGCTGCAGCCCGTCCACAGCCCCAGCCCCACGGGACTCTGTGGAGTCGGCGCC

GTGACATCCCCAGGCCCTCTCCACA

>198

TATTGTGCCCTTGCCCCCTGACTGGCGACACCCCCTGGTTCTGCTACTGTGGTGCT  
GTGTCCACAGGTGACTTTCCAGCAGATCTGTAAGGATGTGCATCTGGTGAAGACCA  
GGCCAGCAGCTTTTATTGAGT

>199

AGCCTCTGGTCTCCAGACTGTTCCCTCTGTTCCCTACCACCATCCCCTTCCCCTTTTCC  
CTGGGCACAGATCCGCCGTACGACGCTGTCTGGGGAGGGGGCCACCCACGGAAG  
GAGCCAGTGGTGGGAGGCACCT

>200

GAGGGTGTGGTATGGATGTGTTGACCCCTGAAGTGGTTCTGATGACCTTCCCTATCTC  
ACTCTCTCAGACATCATGATGGAGGACCTGCCTGGCCTAGCCCCAGGCCAGCC  
CCCAGCCCAGCCCCAGCCCCAC

>201

ATTTCCGCGGCAGTTTTTGGTCTGGGGACCGTACCGATGCCTCCACGCACGCTTT  
CTTCCCTGAAGGGAGACGTCGCTGCGCTGGCCCTCTCGGCGGTCCCCCACCCGGGT  
CCCGGGCCACTGGCCCCCGCA

>202

TCGGGGAGCTGGCCACGGGCGGGGGCTGGGCCGGGGCTCCCAGGCGTGACCC  
CCGGGGCCCGCAGGCGTGTGGCTCACGGACCTGGTGACGTGGCGGCCACGAGATC  
GGCCACGCGCTGGGCCTGATGCACTC

>203

TCCCTTGTGGGCGGGAGGGCGGGGACCGGGCGGTCTGAGCCAGGCGTGCTCCCC  
ACGCTCCCGATAGGATGCCTCGACAGGCTGTTCTGTGCGCTCTGGGCGGGAGGG  
GCTTCTGCGACGCTCGCCGGCGGCT

>204

CGTGGGAGCTGGGCCTTGCCATGGCGCAGCTGAGGGGGCACTGACGGAGCTTTTCC  
CCCACCGGAGCAGAATTTCCCTTCCCCACGGTGGCCACCACCCACCGCCCCCAGGA  
CCAAAACCAGGCTGGTGCCCGAGGG

>205

GGGGCAGGGGTGCGGGGAGGCAGCCGGGGGGGGGGCTGTGCCTGCAGGAGACGCC  
CCGCCCCCTGCAGCTGGTACAAGGACCAGGAGCCCTGGAGTTCTCCTACCCGGCT  
ACCTGGCCCTGGGCGAGGCGCACCTG

>206

AGAAAGCATTACCCTTATATTTAACTGTGAAATATCTGATTTGAAATTATTTACTTCTTT  
TTTCCACAGCCTGGTGAAGTCAAAGAGGCCCCAGGGGACCATATCCACCTGGACCGC  
TGGCTCCTCCTAACCTTTTG

>207

CACACACAATCCTCAGCTAGGTGCTCCGAATATCCAGCCTAATTTTTCTTGCTTTTG  
TTGTATCAGGGGATGTGGCTCTAAATCAGCCGGACATGTGCGTCTACCGAAGAGGGA  
GGAAGAAGAGAGTGCTTACAC

>208

GTTTATTCTGTGTTTAGGAACTGTAGGGGTGAAATGCTGACCTGTGTTACTCTTTCTTT  
CCATGATCAGCGTCCAGAGGACCAGAGGTTAATTTATTCTGGGAAGCTGTTGTTGGATC  
ACCAATGTCTCAGGGACTTGC

>209

AACTTCTGAATGTTTTTAAGCACTCACCAGGTTAGGTTTCAGGTCCTTAAGTACCTTCGT  
ATTACTTTTAGCAGGAAAAACGGCATGTTTTGCATCTGGTGTGCAATGTGAAGAGTCCT  
TCAAAAATGCCAGAAATCAACG

>210

AATTCCTTTTGCTTGATTCAGACAGTTGCATCAGCTCCTTTGTTCTGTGTTTCATGTTAC  
ACTTATTTAGGTGGCTGAATCCACAGAGGAGCCTGCTGGTTCTAATCGGGGACAGTATC  
CTGAGGATTCCTCAAGTGATG

>211

TTTAAACTTAGTTTTTCATTTGTTTCATACTCAACCCACTCAAAATGAGTGTTTTTTCAAAT  
CTATGTATAGGCCTGAAGCTGCCAGCAGGCATTCCAAGGCCTGGGTCCTGGTTTCTCC  
GGTTACACACCCTATGGGTGG

>212

GTGTAAATAAGCCACAGACTTCACGGTGCTTTGGTCTCAACAGTATCTGCCTCTGTCGT  
TTTTATTTAGTTTAGCAGCCACTGCTGCATCAGGGGCTTTTGTCCACCACCAAGTGC  
ACAAGAGATACCTGTGGTCTCT

>213

AGCCTTGGATTCTTGAGTAAGTCTCACTGTGACATCAGCTAAGATGGACTTTTATGTGC  
TTCCTTTGAAGGCATCACGTTGGGTGGTTCCATTTAGACCGAGGCCGTTCCAGAACTT  
CCCAAATGATGGTCCTCCTCCT

>214

TATTTGGTGTTTCATCATAGCCCTAATTGTTTTCTCATTGTTTCATTACCTCATTGTTTCATT  
ACCTGTAGGAAGGCACTGATCCTGAAACTGAAGACCCCAACCACCTCCCTCCAGACA  
GGGATGTACTAGATGGCGAGC

>215

AGAAAATTGACTACAAAATACCATTCCATTTATTAAGTCATTCTGACAGGAATCTGAT  
GCTTTTCCAGGAGTTCCAGATCACATCGAGTTCACCATGAATCACTCAGTGAAGCCA  
ACACCAAGTTCATGTTTCGATCT

>216

CAGACTTAGCATGGGTTTAGTATTTACATTGATACAGCAATTGAATGATCTCCTTTTTTG  
ATGTTTGAAGGTTGATAGGTCAGGAAATGTTTCATCACCAGTTTCAAAGCTTCTGACTG  
AATTCAACAAATCCACTGATG

>217

TAAGTAAGTTTGGTAATATATAGTTACATAAATTACTCCTAATCCTACTTCTTCCTTCATA  
TCTCAAAGGAATATTTAGATGCCATCAAGAAATTTTACCAGACCAGTGTGGAATCTACT  
GATTTTGCAAATGCTCCAG

>218

TTTGCAAAGCATCTTCCAGACAAGCCATTTGTAGCTTGTGTAAGAAAGACTCTTTTATTCTT  
TCCCTTGCAAAAAAATTAACCTATTTCTGATGGGACTATTGGCAATGATACGAC  
ACTGGTTCTTGTGAACGCAAT

>219

ATCTCAATAATATTATCTTTTTGTCTTGTGTTTTCACGTGTTATTTGTTGGACACATTGAT  
TTATTGCAGAATACATACAAATCTGTACAGATGATGAGGCAATACAATTCCTTTAATTTT  
GCCTTGCTGGAGGATGTAC

>220

TCAATTCATTGTTAAGGTGATTAGAGATCGACAGTTAGTCATATCAGTTTCTTTTTTCCA  
TTTGTATAGCTTGAAGAGAACTCACTGCTGAGAAATTGATGGAATGGACAAGTTTGC

AGAATATGAGAGAGACATGTG

>221

ATTGTTGGTTATTACAGGTACAAAATTAAGAGGTTTTGTTCTTTAAAAATATCTTT  
TTGTTTACAGAAAAACAAAATTATCTTCTTTCCAAATCCAAAAAGATGAAAACGACTG  
AGATACTTTCAAAGACAACCA

>222

TTAAAATGTTATAAAATAGACTGTTGTGTTGGCTTACTGGAATTACGAGAATTCTTTTTC  
TCTCAAACAGCGTGCAGTTAAAAATTTATTATGTTAACATCCAACCAAAATGTACCAG  
TGTTTTCTTATTGATCCTTTGA

>223

CTAGTATTTGGCTTTAAATATTCAATGTTTAAGTGTGTTTCTTGATGTTTGATGCTTCTT  
TGTTTCTAGGAAGGCTGGTTTCGGATAGCTGAGAATATGGGATTTTCAGTGCCTAAAGAT  
TGAGAGTAAAGATCCCCGGC

>224

TATTTGTCCTAATGTTCTCCCTCCCTGTTTCCCCACCCCTCATTAATAAATCTTAACTTT  
TGTTTTCAGGCCAGAGTTACAGCAAGTTACTGTTGATGGACTGGAAGTTCTCATTCCAA  
AGGATCCAATGCACTTTGTA

>225

CAGATGCCACAGAAAGGTTCTAGCAATTTAGAAATGGCTGTAATAGCTGACTATTTATT  
ATATCTGTAGCAGTACCTTGATGATAACACTGTGGAAGCTGTGGCCTTTCCGAAGAGTG  
CAAAGGAATTACTGCAACTAG

>226

TATAATTTGTTATAATAACTAATTTTTTCCAAACCTAAATTTTGTAAAAAAATTTAATCT  
TCTTTTTAGGATGGTATCGACAATGCAACATTATTCCTTATAGCAAAGATGTTGACCTAG  
GAATTTTTTATACAAGATTA

>227

TTTTAAAAAAGGTTTTTAAAAATGATTTCTTTGTTTCAGTGTGTAAGGTTTTTCATC  
TTCCCATAGGTAGAAGACAGCTTGGAACTATCCTTCCAGGGAAAAGATGATGTAAAA  
CTTGATGTTTTTTTCTTCTATG

>228

CACTAGCAGCTAGATTCCTTAGCTAGACCTTCTTCCACTGTTGAAGCCTAATCCCTCTGT  
TTTGCTGCAGATACCTGTTTCCGAAGTTTACTGTGCTGGACTGAGTTGTAGACATG  
AAGGTCCATGTACCCTGTGAA

>229

ACAGCAGAGGAGACAGTTCATCAGTTGCGTTCCCCACAGACAGTCACAATGTTATGT  
GATGTATTTAGAGGCGATGATATTCTCACCATCCTGACTGAAGTGAAGTATGAAGTAA  
GCAACAAGGATGACAAGAAAAAC

>230

TAAGGAACAGAGAAGGGGGTTTGAATGTGATACTTGTGTCATGCTGACTTTTTTTTTTT  
TTTTTGGTCAGTAAATTTCTAAGTGTGAAGAAAACTTGAAGTGTGGGAAATGCA  
ACAATCCAAATGGCCATGGGCAC

>231

ATAAGTGAACAATTTGGAATTTGAGTCGTAATGGAGTCAATGATATTTCCCTTGTT  
TTGCTCTAGGAGGCGATTATGCAGCCCCTTGATCATAAGAATCTGGATATGGATGTGCC  
ATACTTTGCAGATGTGGTGA

>232

G TTCATTATTGTCTTGTTAGAGAGATGACTGGTGAAATGCCTTTTTTATCTACAAAAA  
A TATTTTTAGATGGCGGGTGAAAAAGTTGAGAAGCCAGATACTAAAGAGAAGAAACCC  
G AAGCCAAGAAGGTTGATGCTG

>233

G GACCACGGACCATTATGTCTTAACCTTAATTGGCATTCTTACTGTTGATGCATTTGT  
G TCCTTGTAGGTTGAAAAGAAAAAGAAGGAGAAGGTTCTCGCAACTGTTACAAAACC  
A GTTGGTGGTGACAAGAACGGCG

>234

G CTGACATAGCTTGCTTCTAGTAATCTGAATGGCTTATTTAAATAAGTTGGATCTATGGA  
C TCTCCACAGCCTAGATATTATCCTACTGAAGATGTGCCTCGAAAGCTGTTGAGCCACG  
G CAAAAAACCTTCAGTCAGC

>235

A ATGGTCACCTAAATTGCAGGATGATGATTCTTCCCCTTTTCCTTGCTAAATTAATTTT  
C CCCCTTAGGACCTCTGGTCTCAATCGAGTTCCTCTACGAAGAACACACCAGAAATT  
T GTCATTGCCACTTCAACCAA

>236

A CTCTTAGTTGACCTACAAGTAATTTGGTATGTGCCTGTTTTAAATGTTTGATTTTCT  
C TTTATTTAGAAATATGAGATTACGGAGCAGCGCAAGATTGATCAGAAAGCTGTGGACT  
C ACAATTTTACCAAAAATCA

>237

T TCTTGCCCCGAGAACGCCTGCAGCCGTGCGCAAGCAGTCACGACCCTCCTGGTCT  
C TCTTCTGCAGGATGTACCCTGCCACATGTACCAAGTGTAAGTCAAGACGGGGA  
A TAAAGCGGAGCGAGGACAGCAAG

>238

T GCGGGGCTGGGAGGATAGGCTTCTCATCTCCTTCCCAAGCGCCACCGCCTCCCCG  
T GCGTCTTGCAAGGAGACCTACAAATTGCCGCACCGGCTCATCGAGAAAAAGAGACGT  
G ACCGGATTAACGAGTGCATCGCCC

>239

A TTGCTAATAAATGTCCCAAAGGTGGGACTTCTCTGACCTCACCGCTGACTAAGGCTCT  
T TCTCTCCAGACTTTGGGTCACTTGAAAAAGCAGTGGTCTTGAACCTACCTTGAA  
G CATGTGAAAGCACTAACAACCC

>240

T TTGGAGTATAGTTTCCAGGTGCGCCACAGGCCTTCTGAAACGTTTTCTTCGGATTTT  
T CTTTCCCAGGTGAGCTGTGAGGGAGAAATGTCGAAACAGGTCAAGAGATGTTCTGC  
T CAGGTTTCCAGACATGTGCCCC

>241

T CACCTCATTCCCCAGAGGAGCCAAGAGCGGAGGCTGCCAGAGTGCCAGCACGGT  
C TCTCCCCTCAGGAACATGACATCGAGACACCCTACGGCCTTCTGCATGTAGTGATCC  
G GGGCTCCCCAAGGGGAACCGCC

>242

C TGGGGGCCCGCCTTCTTCCAGTCCCCGGCCCCCTGCTCAGCCATAGTGGAAGT  
G GTGCTTTGCAGACAACTATGCTTCAACACCTTCTCAACTTCGAGGACATGCAGGA  
G ATCACCAAGCACTTTGTGGTGTG

>243

C TTTACAGAGTGTCTGCCATCTGCACCCATCCTGGCCCCGCCGGCCTGTTTCCCC  
T CTTACTGCAGCTCATCTTCCCCGACCTGGTGGAGGGGCTGGTGCTGGTGAACATCGA

CCCCAATGGCAAAGGCTGGATAG

>244

CCAGCCCCCTCTAAGCCTGCGTCCCTCTGTCTGCCCTCTGCATGCCTCCATCCATCTCC  
CTGGGCCTAGGAGGAGCTGGTGAACAACACAGAGTTGGTGCAGAGCTACCGGCAGCA  
GATTGGGAACGTGGTGAACCAGG

>245

CCTACTTTTCCCACCAGAGGCACCTGGCCCTGCCCGCCAGTCCTCAGGCCATCCTGTC  
TCTGTCCACAGTGCCCTCAGCCAGCATGACCCGCTGGCAGCTCCCGCACTGCATCC  
CTCACCAGTGCCAGCTCGGTGGA

>246

GGCAGAGGAGCATTGGGGTTTTTTTTTAAATCTCTTTAATGGCCAATACTAATAACTT  
ATTTTTTTAGCCCTAGAAAACAATCTCCTGGTCCAAGGTGCTTGAGTGGGCCGATCCAG  
CTATATCAAGAACCTTTGAGA

>247

TCACTCCACAGTGGGTGACAGCTGTGTTTTCTAGCTTAAAGTATAGTCGTATCTTTTGTC  
TTTCTATCAGAACGTGAAAAAACCGACTGGTTCAGGAGTGGCCAGATTCCATGCC  
AAACACATCTACAGCTCGGAGG

>248

AAGACTGCACAGGAGTCAACAACCGACATGGTTCAGCCAGGTGTGGTCATTTTCCTCT  
GCTCTTTGTAGGGAAACGCTGTCCCAACTGTGACGGGCCTCTGAAGCTCATCCCTTG  
CCGAGGTCATGGGGGCTTCCCGGT

>249

CTGATACACCATGAAACACAGTCTAGTTAGTGTTATATCATTTCCTTTCTACTTCCTTGTC  
TCATTTAAGTCAAAGGGAGAGCATGATCATCCAAAACCAGAAACCAAGTTAGAAGCTG  
AGGCAAGAAGAGCCATGAAGA

>250

CATGGGTGCCTATGGCAGTGGTTTTGATTTGCTTAACTTATTAACACGAGCATTCACTT  
TCCTTTCCAGTCTCTTCCAGGTGAAACACAAAGTCAGGGGAGTTTACCTTTAACTTGG  
TCTTTCCAGGAAGGCGTCCAAT

>251

GCCTAGATGTGGTACATTGACCTCACCTATGCCTCTCCCCACCCCTCTGGGTTGTTTT  
TGTCTTCCAGATTGCTGGACTCGCTGAAGAGAGACTACGCAGGAAAGCCCCAGCCAC  
CCATCAAATCAGAGAGAAGGAAT

>252

TCTTAGTCTTCATTGAATTTGGCAGAGAGAGGTTGTTCTTCAAGAGGAACTGTTTCTTA  
TCCTGATTTAGGTAAGAAAGTACTCATTGTCTATGCACACCAGGAACCCAAGTCTTTCA  
ACGGATCCTTGAAGAATGTGGC

>253

TACTGGGATGGTTGGGATGGGCTGTGGATGCCACCTAGGAGTGAGAATGTTTGGCCT  
CTCCCCGACAGGTA CTCTTCTAATCCTGAGGTTTTCAATTATGGAGTGGAACCCAC  
GAAGCCTACAAGCAAAGGTCTCT

>254

CAGATAAACTAACTAGGAAACCTGAGGCGAGCCGCAGCCTCAGTTTCTCTTTGGTGT  
TGCCGCCCACAGTTCCCGCTGTACTGGTTCAGCGTGCCAGCCATCCTGAAGGGCTGGA  
TGGATAGGGTGCTGTGCCAGGGCT

>255

GCTGGAGGCTCAGCAACATTTCTGTCCTTCTGGAGTCCACACAAATGCATCTGCTTT  
CTCCCTTG CAGGGTAACTAGCGCTCCTTTCCGTAACCACGGGAGGCACGGCCGAGAT  
GTACACGAAGACAGGAGTCAATG

>256

AATCATTTAACTGAATGGTATGTAACAGGTGTAGTTTCTAATGAGTTCTTTTCTCCCT  
GTGGCTTTAGCATGGCACATTACACTTCTGTGGATTTAAAGTCCTTGCCCTCAGATCA  
GCTTTGCTCCTGAAATTGCAT

>257

GCTGAATCCCTACCAGGGCATGTCCTCAGCAAAGCCAGACCTCGTGATCCTCTTTCTTC  
TCCCTGCTAGGATTTGGTGGCCTGGGTGACAGCTGGTTTTCTGCATATCCACATGCA  
GAGGACATTCCTAACACAGTGA

>258

CACATGCACCCACGCCAAGGACCCTGAGCCTCGGCAGATCTGTGACTTCCTTCCGTCC  
CCTCTCCTTCAGCTGGCAGGCTGGGAACCACAGCGCCTTCTGGGGCATGACCCTGGAT  
GAGGGCATTGCTACCGCTGGGC

>259

GTGCCAATGGGCACCTGAGGGGCAGGCCAGGGCAGAGCAGGAGGCAGACAGGGCAA  
CCTTTATCTTG CAGACAGTGCTGAACCCAGGGGAGGTGCTTCCACAGCCTTCGAGGC  
CTCTGAGAAGTGGCCCAACCTGATTC

>260

AGGGCTGGCGCCTGGGAGAGGAGGGCCAAGTCCTGAGCCTCCCGACAGCCCCTCTAT  
CTCACCCACCAGCTGTGGCATCCGATCGTGTCTCAATCCATTCTCTGGGACACATGAC  
GCCTGTCCTGTCGCCCCAGAACCT

>261

TCCGTGGGCATGGCCTGGGCCATGATGCACTGAGTCTTTCTGCCTTTGCTCCCTCTTG  
TGCCTTTGCAGGGTGGTGTCTGACCACTGCTACCCCTTCTCGGGCCGTGAACGAGACG  
AGGCTGGCCCTGCGCCCCCTGT

>262

CTCAATAGACTCAGGCTCCAGTGCCTGTGCCAACGGGCTGAGTGGACCCTACCTTGAC  
ATCTGCCACAGCCCTCATGGAGGTGCATGAGGACTTCTTCTATACAAGGGAGGCATC  
TACAGCCACACGCCAGTGAGCCT

>263

TTTCTATGTGTGACTCTTTCATGGAATAACAACCTCACTGCCTCTTAACCAAAGCTGTTTT  
CTCCTTCCAGTGGGTTGCCAGCGTTGATGTGGTGGAGAATGAAGAGGCCAGCGCTAGC  
ATCATTGTTAAAATGACAGACT

>264

TATCCGTAAAGATGCTAGCCTGTGTTGGCTTACCTTACAGTTTATACATTTTTTTGTTCTT  
GTGTTGAAGGTGACTGCTGAGGTTGAAAAGCTCTTGGGTGAAGAGAAGGTGGATGCA  
ATTCTTTGCGTTGCTGGAGGAT

>265

CTGCATGAATTGAGCTCACCTTTTGGTTTCTTTCCTGGGAATGCTGAGCCACATGTTT  
TTTTCACTCAGCTCTTTAAGAACTGTGACCTGATGTGGAAGCAGAGCATATGGACAT  
CGACCATCTCCAGCCATCTGGC

>266

GAAGATTGCATGTCCTTGCTGTCCCCTGGCCGCCAGTGGTCACTGAGCCATCTTCTCC  
CCATTTCCAGGTATGATCGGGTACGGCATGGCCAAGGGTGTGTTACCAGCTCTGCC

AGAGCCTGGCTGGGAAGAACAG

>267

CAAGGGGGACTGGGCACCTGTTGTTAGAAAGGAGCGACATGAATGACGTGCTTATCTG  
TGTCATTGCAGGGTTACCCTGGATACCCCGATGAACAGGAAATCAATGCCTGAGGCT  
GACTTCAGCTCCTGGACACCCTTA

>268

CTGTGAAGGTCAGCATGTGCCAGATTTTTGCTTTGAGAATATAAAAAAACTTTTATT  
TTCTGTTCCAGAACTTCCATGACTGGATCACAGGGAAAAACCGACCGAGCTCAGGAA  
GCCTAATCCAGGTGGTAACCACA

>269

AGGGAGGGGCACAGGCCATGGCGGGCTCAGCGTTCTCCTCCCACCACCCACCATGCT  
GGACTCTCCAGGTCAGCACTTAAGCGATGCCTTTGCCAGGTGAACCCCTCAAGA  
AGGTGCCAGCCTTGAAGGACGGGGA

>270

AAAAGCGACTATGTATGAAATACCCAGCACAGTGCCTTCCCTTACCCATCATGACCCC  
CACACCCACAGTGTGGCCATCCTGCTCTACCTGACGCGCAAATATAAGGTCCCTGACTA  
CTGGTACCCTCAGGACCTGCAG

>271

ATTAGGGAAATGCAAATCAAACCTAACTCCCTACTCCAGTAACTCCCGACTTTGCCTGC  
CCAATCCCAGGTGATGTTCCCTGTTTTCTGGGTGAGCCAGTATCTCCCAGACACTG  
GCAGCCACCCTGGCAGAGTTGG

>272

CCCAAATCAGATGCTGCCATCCCTGCCCTCACAACCATCCATCCCAGTCTGTACCCT  
TTTCCCACAGCCCGTGGGTGCTGGCTGCCAAGTCTTCGAAGGCCGACCCAAGCTGGC  
CACATGGCGGCAGCGCGTGGAGG

>273

AAACTGCCAATTTTCTGAAATGCTCTTTAAATCCTGCTAATGGTGGCATTGTGTCTTTG  
TCACCTACAGTACATTTCTGGATTTGGGAATGAGTGTCTTCAGAGGATCCTCGTGCC  
CAGGTTCCCTGCCAGAAGGAC

>274

AGTTGGTTGGTGGGAAGGTGGGATGCTTTTCGGATGGGAGTAATATTGTTTATTGCATC  
CTTTGTTTCAGAATAATCCTCAGGTCTGCCCTACAATCTCTATGCTGAGCAGCTCTCAG  
GATCGGCTTTCACCTGTCCAC

>275

CTGAGCCATTCTGTGTATCACTCAGAACATACTCTAAGGCTTGTATATCTTGTATGTTTT  
TCCCTCTAGCTGGCTGTATAGGATTCTACCTCAGTTTCTACAAGCCCTTTGAATCCAT  
TGACGAAGGCCATGTCAT

>276

GAACAGTGGAAAGGCTGCCTCTTGGGCACCGTTCACATTAACCTTTCCCTCTTCTGTG  
GGTCTCTCCAGGGCCTGCATACCTTGTGTGGAGCTGGAGACATAAAGTCTAACAATG  
GGCTTGCTATCCACATTTTCCTCT

>277

CCTTTCTGTTTCATGAAATGGTTATCACACCAAAGAATTGCTCACCCTGCCCTGTCT  
TTTTTTGTGAGTCCCGCAGAAAGGGAACCTTCTCATTTACACCGAGTTTGGCAAGATGC  
TTGTACAGCCCAATGAGATCTG

>278



CTCTGGGCAGCTTCTTTATAACTACAGCTGTGATTCAGAGGGCACACCAGTGTCTGCT  
TTCCATTCCAGAGAGGAATGCGGTTCCAGCATAGATGTCTTTGAGGAGACCAGGGGCTA  
CATCTTGGAGGTCTATGGTGTC

>279

TCATGCAACCATGGGCATCTTTCCTATGTTTTGGAAGTTTCTAAAAGACTTTTGGGTAC  
TGTTTTCTAGGGGCCAATGGCTTGGCCAATCCTCGTGATTTCTTGATACCCATTGCCTGG  
TATGAGGATCGCCAAGTACC

>280

ACATATTGTGGGATCACAGCTACAAAAGCATTAGATGGTAAAATTATCCTTTCCTGCTTT  
TTGTGTTTAGGATGTCTCCCGTTCAATGTTGTGGCCTGGCACGGGAATTATACACCCT  
ACAAGTACAACCTGAAGAATT

>281

ATGAAATGTGTGTCATTGTCCAGTCACTCCCTTGCATCATGCGTTCAGTCTCTCCTTGT  
GTGTTACAGGACCCATCCATTTTACAGTATTGACTGCTAAGTCTGTCCGCCCTGGAG  
TGGCCATTGCTGATTTTGCA

>282

GTTTAAGGGGCTTTGTGTTTTACTGGTCTTGCCTTGGATAATAAAAATAATACTGCTTCA  
ACCTTCCAGGGAAGTGCATGAGTGAGTTCATGGGACTCATCCGAGGTCACTATGAGG  
CAAAGCAAGGTGGGTTCCTGCC

>283

GACATCTAATCAAATGTGTTTATTATCTATCTCACCTCTTTTTTCTCATCCCATCGTCAC  
TTCCTCCAGGCATTTATGTTGAATCATCTTTAAGTCTGGCGGTACAAAAGTGGGGACT  
CAAGGCCTCCAGGTGTTTGG

>284

GGGAAGGGGCATACCATTTAAGTACCAAGAAAACTTGCATAATCTCATTTTACTTT  
CTTTTTTCTAGCTGGATTTTCTCTACGTGCTTCAGTCTTCTCTACACAAAGAGCTGCA  
AACCAGGTCTTTGTTTGCCT

>285

TGATTATGCTCTTCTCTACCCATCCCCGCAAGGCAGATGTTTTCATGCTTGAATTTTGT  
TCCCTAAAGTCAGGAGAAATCTTCTGGACTTAAGTAAAGAAGAAAAGAACCACTTTGT  
CCGGGCCCTGGATATGGCAA

>286

GAGTAGACCAAACAGAAATGAATAATTGTAAACAGAAGCAGAGAGTATTAATGTGGTT  
TCTGTGATCTAGGAAATGTTGCAAGAGCCTTCTTCTCCCTCCTTACTGGAATTTTGCA  
ACGGGGAAAAATGTCTGTGATA

>287

AGTTTTAAAGAGCGACAATAAGAACTCCAACATTGTGTAATGTTTCCACATCCCATT  
TTTTTCTGCAGGCACCGAGGATGGGCCAATTAGGAGAAATCCAGCTGGAAATGTGGCC  
AGACCAATGGTGCAACGTCTTCC

>288

CATTGCTATTACCTGGAAAAGTGAATATTTGCAATAGTTTTACTATTCTCCTCCTTACCA  
TGTGTCTAGGTTACAGTGACCCACGGGAAAGTATGACCCTGCTGTTTGAAGTCTTCA  
CAATTTGGCTCATCTATTCT

>289

TAGAACTCAATAATGATAGGAATATTAATTTTATTATGTTTATTAATACGTTGTCTTTGGAA  
TAATTTAGATATATCCACATTTCCATTGGAAAATGCCCTATTGGACATAATAGACAATAC

AACATGGTGCCATTCTG

>290

ATGTGTCCACTTTTTGGTGATAACTATTTAATATTTGTCTTTTTATTTTAAATCTTCCTTT  
CCAAATAGGTGCGGAGTTTAGTGACCTGAGATAATTGCCATAGCAGTAGTTGGCGCTT  
TGTTACTGGTTGCACTCAT

>291

TTACCACATATAATTCTTAGGTTTCTACAGGGCCTGTCTAACCTGACCTTACTCACTTTTT  
ACATAACAGGGTCCACCAGGCCCCCAGGCAGAGATGGTGAAGATGGTCCCACAGGC  
CCTCCTGGTCCACCTGGTCCTC

>292

GGCATCTTAAAAACAGATATGCTGTTTCATTATTTGCTGGTTAATTCCTTGGTTAATTC  
CTCTTTTAGGGTGAAATTGGAGCTATTGGTAACGCTGGTCCTGCTGGTCCCGCCGGTCC  
CCGTGGTGAAGTGGGTCTTC

>293

GGCATTTAATGTGTGCTGCCTCTACAGCCCATCACCTCCCTAATGGACCACACTGCATTT  
TCCTTCATAGGGCCTTCCCGCGTTGCTGGGGCTCCCGCCTCCCTGGACCCCGCGGTA  
TTCCTGGCCCTGTTGGTGCTG

>294

TTCTCCAGCTGGACATAGTATTAATAATTATTTTTTTACTCCCTCTCTTTTGTCTTTTCA  
TTAAACAGGGCTCTGCTGGGCCCAAGGTCCTCCTGGTCCCAGTGGTGAAGAAGGAA  
AGAGAGGCCCTAATGGGGAAG

>295

TCTGGTGGTGGGTGTGTCATTAGCTTTAGCATCCTCCTCCTATCTGTTTTTTTTTTTTT  
TTTGAATAGGGCCTCCTGGTAGTCGTGGTGCAAGTGGCCCTGCTGGAGTCCGAGGAC  
CTAATGGAGATGCTGGTCGCC

>296

GCAGCATCATAAGCTTGAGGTTGTGAGAATATGTTGACTGAGTAACTGAAATAAC  
TCTGCTTTCAGGGCCTCCCTGGCATCGACGGCAGGCCTGGCCAATTGGCCCCGTTGG  
AGCAAGAGGAGAGCCTGGCAACA

>297

CTCTCATATGTAAAACAGTATCACTGAAAGTGATGAATGGTGCAACACTTCTTCTAATC  
ACTTTTTTCAGGGGGAACGCGGTCCCCAGGTGAGAGTGGTGCTGCCGGTCTACTGG  
TCCTATTGGAAGCCGAGGTCCTT

>298

TCTTCTAGAGTTTGATTCTTCATTTCTTCTTCTCCACTAAAATTGATTTACATGTGTT  
TGAICTAAGGGTGAACCTGGTGTGGTTGGTGCTGTGGGCACTGCTGGTCCATCTGGTC  
CTAGTGGACTCCCAGGAGAGA

>299

CTGAAAACATCCTAAGTTGGGGAGTAGAGTGGGTCGGAATACCAGAGCTGTAAGTGT  
TATTTCCAACAGGGTGTGCTGGTCAACCGGGTGCTAAAGGAGAAAGAGGAGGCAAA  
GGGCCTAAGGGTAAAACGGTGTTG

>300

ATCTTTGCTGCTCTTCCAGGCCCTTGGTGATTAACAGAAAGGAAATGACCTTGACA  
TTTGCTCATAGGGTATTTCTGGCCCTCCTGGTCCCCCTGGTCTGCTGGGAAAGAAGGG  
CTTCGTGGTCTCGTGGTGACC

>301

AATCTTCAAGCCAACCTGTGTTATCACCTAGGGTCTTACCCATAATACTCAGTATTTTT  
CTCTATTTAGGGACCTCTGGCACTCCAGGTCCTCAGGGTCTTCTTGGTGCTCCTGGTA  
TTCTGGGTCTCCCTGGCTCGA

>302

TGTTTTGGAGGGGAAGGTTAGCATTCCATCGAATAAGGGGAATGTCATTTTATCTTCTCT  
GCCTGTTTAGGGTGAACCTGGTCCTTGGCATTGCCGGCCCTCTGGGGCCCGTGGT  
CCTCCTGGTGCTGTGGGTAGTC

>303

TCTTTCTCTAATTCAAAGTGATTAATAATGCAACCCAGATTGATGCTAAGCTTCATTTTG  
CCTTTGGTAGGGAGAGCGGTTACCCTGGCAATATTGGTCCCGTTGGTGCTGCAGGT  
GCACCTGGTCTCATGGCCCCG

>304

GTATTTGTGGTGAAGTGAGTGCCATTTTTTAAAACGGTAAGTCTTATCCATCCTTCTGT  
TTCTTTATAGGGCCCAAGGCATTTCGTGGCGATAAGGGAGAGCCCGGTGAAAAGGGG  
CCCAGAGGTCTTCTGGCTTCA

>305

TGAGCCCCAGGCTGCTGCTCCCTTGGTGGGATTCACCAGCTCACATGTACCTGGTGTCT  
GTCTTCCTTAGGGCCCTGCTGGTCCTTCTGGCCCTGCTGGAAAAGATGGTCGCACTGG  
ACATCCTGGTACGGTTGGACCTG

>306

TCTGCTGCCATGGATGTCTCTCACTGTAAAAAATATAAAGCCTCTCCTATCTAACTTTC  
ACCTTTGCAGGGCCCCCTGGTCCCCCTGGCCCTCTGGACCTCCAGGTGTAAGCGGT  
GGTGGTTATGACTTTGGTTACG

>307

TTAGTTATTATTAGAATCTGTGTTCTGCTCAATGAGAAGTTTCATGATCTGAATGTTATTT  
TCTTAAAAGGTTACTACTGGATTGACCCCAACCAAGGATGCACTATGGAAGCCATCAA  
AGTATACTGTGATTTCCCTAC

>308

TTTTTCATGTTGACTCTTAGTATCTGAGTCCTTCTCCACTTAACTGGAATTCATCCTAT  
TTTCTGTAGTTTGAATATAATGTTGAAGGAGTGAATCCAAGGAAATGGCTACCCAAT  
TGCCTTCATGCGCCTGCTGG

>309

CAAAGGTTCCAGATATTATCAGATTCAGAAATAGTGATGCTTTGTGTATCTATTTTCTTCTC  
TTTAAACAGAAAAAGACAAATGAATGGGGAAAGACAATCATTGAATACAAAACAAATA  
AGCCATCACGCCTGCCCTTCC

>310

AAATTTTTTTTAACTGGGTTAATGCTTGCTGAATTGGAAGTGAATGTCCATTCCTTTGCC  
TCTTTTGCAGATATACACTTCAGATAACTACACCGAGGAAATGGGCTCAGGGGACTATG  
ACTCCATGAAGGAACCTGTT

>311

GGGTGTGTGGGGATAGTTGAGGTTATGGTGGGAACCTTGGGCCCTGCTGACCCTGTTT  
CCTCCTCCCTAGCCTTTATCCTCCTTCTACCTCGTTTTTTATGGGTTCTCACCGCCAT  
GTTACCCTCACCATGTGGGT

>312

CCATTTTCTCCCTCTGTGTGCAGTCCCTCATCTTATAGATCCCCAACTTCTGCCTTTG  
TTGGCTGTAGGCTTGATGATTCGCCCAAGACTGAGAACCTTGATGTCAATGT

CAGTGACACTGAAAGCTGGGA

>313

TCGGGCAGGGGACTGGGGACCTTGAAGTGGAACATCTGGCCCCTGAGTCTCTCCCTC  
CCACCTCTTTAGCTTACAACGACTCTATCCAAGCCAAAAGAATGATGTCTGCCGCCCT  
GGGCGCTATTACGAACAGCCAGA

>314

AAGTCTGGTGAGCTCCTGGGTGCCTGCCATCCCTAACTGGCTAACCCCCTATCTTCCTG  
CACCCACACAGCGAGATGAAGATGCTGAGAATCTCGGCAACTTCGTCATGTTCCCCGC  
CAACGGCAACATCGACCTCATGT

>315

TGCGGGTGGTGAGCTAGGGAAGGAGGCCGCTTGCCCCAGGCCTAGACCCTGCACTG  
CTCTCCGGCCCAGGTGAACACACAGCCCCTGGTGGCTGTGAAGTTCCTGAATGTG  
ACCCCAACGTGGAGGTGAATGTAG

>316

AATGGGCACCCTCGTTCCTGGAAAACGGTAGGCCTGTGGGTGACCAGCTTCCCTATCT  
GTCTTCCACAGTGC GGCTGGGATCCGGCGGCCACCTGCACCTGCGTATCTCTCGGGC  
CGCCCTTCCCGAGGGGCTCCCGA

>317

GACCATAAACCTCTCCACACTGGCTGAGCAAATGAGAGAATGCTTTCATGTTCTCTGAT  
TTGTTTTTCAGAGCCAAAGAGTTCAAGACACGTCTGGGGATCTTCTTCACAAATCAG  
AGCTGGGCTGCGATACTGGGAGT

>318

TTTCCTTTCTTCTTGATTCCCTGCTGTCCCTCCAGCTGACCTATTTCTCTTCTTCCCA  
CAACCCAGATGGAGTGGCTGCCTTCCACGCTTCTCTGAAGACAGAGTTCAGTGAGG  
AGAACCTGGAGTTCTGGCTGGC

>319

CCGTTGGCCCTCCCTCAGCCATGCCACCCCTTCCCCAACTACCCTGTGTGTGCCT  
CCTTCCCGCAGGTCAACATTGACCATGAGACCCGCGAGCTGACGAGGATGAACCTGCA  
GACTGCCACAGCCACATGCTTTG

>320

TTTGCATTCATGGAGGGCAACTAAATACATTCTAGGACTTTATAAAAGATCACTTTTTAT  
TTATGCACAGGGTGAACAAGATGGATTATCAAGTGCAAGTCCAATCTATGACATCAA  
TTATTATACATCGGAGCCCTG

>321

GATTACAGGTGTGGGCCACCGTGCCAGCCACCGGTGTGGCTCTTTAACAACCTTTGC  
TTGTCCCGATAGGTCACCTTTGGCTCTTCAGAGATGCAGGGACACACGATGGGCTTCT  
GGTTAACCAAACCTGAATTATTTGT

>322

AAAGCCTCTTGTTCTGTTCTTGTACTGAGACCCTAGTCTGTCACTGAGGATTTGGTTTT  
TGCCCTTCCAGTGATACTCTGAAAGAGCGATGCCTCCAGGTTGTCCGGAGCCTAGTCA  
AGCCTGAGAATTACAGGAGACT

>323

CCACCAGAGCCTGCTTCACTCAGAAGGGAGATGCAGACCCATGTAATCCTCCCCGTC  
TCTGCTTCCAGGACTCATCTGATGATGTGAGAAGAGTTTCAGAGGAGGGAGAAAATC  
GTATTGCCGCCAGAAGAGCCGAC

>324

CCCTCCGCACCCCACCCACCTTGCCTCCTTCTAGACACTAACCTCCGGTGCTGATCCC  
CACCCCTACAGGAGAGCGAAGACCTGGAGAAACAGAACGCGGCTCTACGCAAGGAG  
ATCAAGCAGCTCACAGAGGAACTGA

>325

CCCGGGGAAAGGTGGTTAAGCTGGGGGTTGCAGTCACTACTGACAACGCCCTCTTC  
CGCTGTCCCAGTCCCACCAATCACCTGCGTACAGAACGGCCTCAGGTACCATGACCG  
AGACGTGTGGAAACCCGAGCCCTG

>326

TGTGGGGGGCTGCAGGTGGGCATGGCTCTCGGCCCCACGCTCACCCCGGCCCGCCCT  
CTCCCCCTGCAGGGACCCGAGGCCCCCTGGCCGAGATGGCATCCCTGGACAGCCTG  
GACTTCCCGGACCCCCCGGACCCC

>327

TTCCATCCTCAGTGCCGTCTTCTGCCTTCAATTCAGTGCCTCACTCTGACTTCTCTTG  
TTTGTCTAGAACTTGTCTCCCAGCTGTCTTATGGCTATGATGAGAAATCAACCGGAG  
GAATTTCCGTGCCTGGCCCCA

>328

TCCTGCCATCCCGAGAGGCAAGGTTGGGTTTCCAGGGTGGCTTCTGATATGCCTTTC  
TTCTGATTCAGGGTGAAGCTGGTCCCAAGGGCCCCGAGGCTCTGAAGGTCCCCAGG  
GTGTGCGTGGTGAGCCTGGCCCCC

>329

GCCGCCTGCAGCCTGCCTGCCCCTTCCCTCTGCTCCTAGGCTCACGCCCTGGCTGTCT  
GCCTCCACAGGGTGTCTCTGGTATTGCTGGTGTCTCTGGCTTCCCTGGTGCCCGAGG  
CCCCTCTGGACCCAGGGCCCCG

>330

CAGCCGGCTCTGAGGCTGGCACAGGATGGCCCCCTACCCACAGGCCGCTCCTCCTCTC  
GGCCCTCTCAGGGCCCTGTTGGTGTCAAGGACCCCTGGCCCTGCTGGAGAGGAA  
GGAAAGCGAGGAGCTCGAGGTGAAC

>331

CCTCTTTGGCCCGTGGCAAAGAGCCACAACTTGAGACCCTAACTGTTCTGTGACT  
TCCCCAACCCAGGGTCCCGCTGGTGAACGTGGTTCTCCTGGCCCCGCTGGCCCCAAG  
GATCTCCTGGTGAAGCTGGTCGTC

>332

GAACCCCTGCCATTGCTCTGTCTGCCTCCCTGCTGTCTCACTGCTGCTTTCGTGCCT  
CCCATCCTTAGGGTCCCGCCGGTCAAGATGGTCGCCCCGACCCCAAGGCCACCTGG  
TGCCCGTGGTCAGGCTGGTGTGA

>333

TCCGTCAAGGTGCGTTGTACTTGGCCCTATCTCCAGAGCAGCCTTCACATGCCCTGTCC  
TTCCCTTCTAGGGCGAGAGAGGTTTCCCTGGCGAGCGTGGTGTGCAAGGTCCCCCTGG  
TCCTGCTGGTCCCCGAGGGGCCA

>334

GCGGGGCTTAGGGCTGTGACCCACTTTGGGGCCCCAGGCCTCACTCCAGTCTTCTTG  
GTTGTACATAGGGTGTGCTGGTGGCCCTGGAGCTCCCGGTAGCCAGGGCGCCCTG  
GCCTTCAGGGAATGCCTGGTGAAC

>335

ACACAAGCAGAACACTATAGGTACCTCCTTGCCCCACACTGGAAATCTCAAGCTTAT  
CCATGTCTTTAGGGTGTGCTGGTCCCAAAGGTGCTGATGGCTCTCCTGGCAAAGATG

GCGTCCGTGGTCTGACCGGCCCA

>336

CTGCTCCTCCCCAGGTAGTGAACTCCTGCCTCCTCCCTCCATTACCGCCCTGCT  
TCCTCCCCAGGGTGCTGACGGCCAACCTGGTGCTAAAGGCGAACCTGGTGATGCTGG  
TGCTAAAGGCGATGCTGGTCCCC

>337

GGGCTGACTGAGGACCCAATGATGCACCAGAGCCCCCTGGAGTCTGACAGCCCCTCCT  
ATCCTCATCCAGGGAAATGCTGGACCCCTGGCCCTCCTGGTCTGCTGGCAAAGAAG  
GCGGCAAAGGTCCCCGTGGTGAGA

>338

GAGGTGTGCAGAGCTGGGGAGGGGTCCCTGTGCTGCTGTCTGGCACCTCACCCCTGTT  
TGCTCCCAAAGGGTGCTCCTGGTACTCCCGGCCCTCAAGGTATTGCTGGACAGCGTG  
GTGTGGTCGGCCTGCCTGGTCAGA

>339

GAGATGACTCCAGCGGACTCAAGGGTCCCTCCAGACCCTATCTCTGGCCTGACTCTTT  
CTTCTCCCTTAGGGTGAACCTGGCAAACAAGGTCCCTCTGGAGCAAGTGGTGAACGTG  
GTCCCCCTGGTCCCATGGGCCCCC

>340

CTGCTGCTTCCCTGCCCCATCCTGGCCCTTACCCGGGGCTGACCCATATTCCCCTGCT  
CTCCCCGCCAGGGTGACCGTGGTGAGACCGGCCCGCTGGACCCCTGGTGCTCCTG  
GTGCTCCTGGTGCCCTGGCCCCG

>341

GATGCAGACAGTGCCCCACTCGATGCCAATGGAACCTCCGCCTGACAGTTTGTCCCTT  
TCTCTTCTAGGGACCCCAAGGCCCGTGGTGACAAGGGTGAGACAGGCGAACAG  
GGCGACAGAGGCATAAAGGGTCACC

>342

GGCCTCCTCCAGAGCTGGGGTTGTTGGGGCTTCTGGCAGCCTTCTCAAACCATTTC  
CCCCACTCCAGGGTCCCCCTGGCTCTGCTGGTGCTCCTGGCAAAGATGGACTCAACGG  
TCTCCCTGGCCCCATTGGGCCCC

>343

CTGCTCATGGCCCTCCAGCCCCATAGCACTTGGATGCCGGAATCCCCACTCTCTTCCC  
TCTCTGTGCAGGGTCCCCCGGCCCTCCTGGACCTCCTGGTCCCCCTGGTCTCCAG  
CGCTGGTTTCGACTTCAGCTTCC

>344

ATATGTGCCCCTACCATATGGTGTGGCTGCTCCCTTCCCTGACTCCATCTTGCCCTGC  
CCTACCACAGGAGAGTACTGGATTGACCCCAACCAAGGCTGCAACCTGGATGCCATCA  
AAGTCTTCTGCAACATGGAGAC

>345

CCTGGACAGGAGGCCAGCAGGACTAGAGTTCCCGCATAGCTCACTCTTCCCTCTCTC  
TCCTCCCTGCAGTTCGAGTATGGCGGCCAGGGCTCCGACCCTGCCGATGTGGCCATCC  
AGCTGACCTTCTGCGCCTGATGT

>346

GGCCATAGTGCCCTCTCTCCATCACTCCCACGTGGTAATGCCCCCTCCCGTTGTCTCCG  
CCCCACCCAGAGTACACCGGAGCCTGGGGCAAGACAGTGATTGAATACAAAACCA  
CCAAGACCTCCCGCCTGCCATCA

>347

GCTAAGGTGGGCAGGGCGTCATATCCAGGCCCTCATTCCATTTATTCCTTTGGTTTCTT  
TTCTCCTCAGGGCCCTAAGGGGGAGCAGGGCCCCCGGAATTCCAGGGCCCCAAGG  
CTTGCCAGGCGTCAAAGGAGACA

>348

CCCACCCCCACTCTCGCCACCCGGGCGCCTTCTACCCGGCTCTGCTCCCACCCCC  
ATCCCCCGCAGCAAGGAGTACGTGGAGAACCCGGCTACCCTGGCCCCAGCGGGGAT  
GCGGGCGCCCCAGGGGTTCAAGGCT

>349

AACATAGCAAAAAATAGAGGAAAAGCATTTTCCAATTCTGAAAAATGAAGATTCCTT  
TTTTGTCTACAGGAAAACGTGGAGAGAAGGGTGATCCAGGAGAAGTGGGACGGGGGC  
ACCCCGGGATGCCTGGGCCCCAGG

>350

TCCCCACCTTCAAATTCTGGGCCTGAGACAAGAGGTGCCCTAATGTCTTGACTTTCT  
CCTGTTACAGGACTCCCTGGCCGGCCTGGCCAGGCAATCAACGGCAAGGATGGAGA  
TCGAGGGTCCCCAGGGGCTCCAGG

>351

GCATCGAGATGACTGGAGGTGGGAAGGGCAACATGCTTATCCCTGTAGCTACCCTGTC  
TTGGCCTTGAGATCCAAGGAGAAAGTCAGGGGCCAGTGC GCGCTACAGCCAGCGCC  
CAGTACCGCGGTGTGATGGGCACCA

>352

TTGGTGAGGAGAGATGAGGTAGAAAATGAGTGCAAGCCGCTGGCCACTGACCCCAT  
GGCTCGCCACAGATGCCAGCATTGGGAGCCGCTCCTAGCAGGCAGCACCACAGGT  
GCCCTGGCTGTGGCTGTGGCCAGCC

>353

GTTGTTTTCCCTTCCCCTTTTCTCCTCCCCGATACTGGTCTCACCCAGGATCTTCTT  
CCTCCTACAGGGACCTCTCCAATGTTGCTCGTAATGCCATTGTCAACTGTGCTGAGCT  
GGTGACCTATGACCTCATCAA

>354

AAGTAATTCTCCTGCCTTCTGGAATGATGGGTGAAGATCTTGACTGCCTTGCTGCTCC  
TCCCTTGGCAGATGACCTCCCTTGCCACTTCACTTCTGCCTTTGGGGCAGGCTTCTGCA  
CCACTGTCATCGCCTCCCCTGT

>355

TGAATACCAGGCCAGTGAGGGAAGTGGGAGGTGGAGGTGCCCCATGACCTGTGAT  
TTTTCTCCTCTAGGTTTCATGCCCTCTTTCTCCGCTTGGGTTCTGGAACGTGGTGATGT  
TCGTCACCTATGAGCAGCTGAAA

>356

CCACTAGTGCATTGGGGTGCGGTTCCGGAACAAACTGCCACTGGCTCCCTTTTTTTTT  
TCTTTTTCTAGAGAGACTTGATAAATCGGCCTGAGAAAATAAGTAATGCTCCAGACTAG  
CTCTCTCATTTGTGAGTTCTCC

>357

TCTGTCACTTTTAGTGGTAGAATTGCCTTGAGACAACAGGAACTGACTACAGAAATCA  
TACTATTTAGGGGTTGCTGACATTTGAGGATGTGGCTGTGTTTTTTACCCAGGAGGAG  
TGGGATTATCTGGACCCAGCTC

>358

CCATCTTACTTTGTTTCTCCTTGCTTCAAAGACCTTGGTTGATCTTTGTATTTCTTTTTA  
TTATTCCAGATGTTTTGAACAGAGATAAGGATGAGGAGCCAACCTGTAAAACAAGAGAT

TGAAGAAATTGAGGAAGAAGT

>359

AAAGTTTCCTCATCACGTGGCGAGACCTCCTCTACTTCAATCTTTGTCTTTTGTCTCTGC  
TGCCTTGCAAGGTTGGTACAGTAGGCTTCACTAGACTTAGCTGCAACTCAGAATTTCTC  
CTCCAGCACCTGAGTAAATGC

>360

AAATGAATTCATTATGAATGGCAATTATAGCTTAATCAAGGACTCAAAGATTCTTTTTCC  
TTCTTTCCAGGATGAACACCAGGATAAAATCTACCCCTCTTTCCAGCCACAGCCTCTGA  
TCTATCCATTCGTTGAACCTA

>361

AAAAGTGAAGAGAGTTGAATAGTTACGTGTTATAACATAACTAATTATATATTTGCTCTC  
TATTCCACAGAATTGACTGAGACTGGAAATATGATGCCTTTTCCGTCTTTGTATCACGTT  
ACCCCAAATTAAGTATGTTT

>362

ACAGCAGCCTAACGAGTGCCTGTCTACTTGTCTGTCTTGTGTTTCATGTGTCTGCATG  
TCTGTTCTCAGGACCTGACAGGAAGCGGGCCGACCTACACGCGCTACCAGAC  
GCTGGAGCTGGAGAAGGAGTTCCA

>363

TGGCCCTGGAGGAAGTAGGGGGATGTGGGGGTGAGGTAAGTCTCCTTGAATGCTGTAC  
CCTGTCCATTAGAGCAGCCATGGCCAGCTCCAGGCGAGGCCTCCTGCTCCTGCTGCTG  
CTGACTGCCCACCTTGGACCCTCA

>364

GCCGGGGGCTCCCCACCCTCCTGGAGCCTGAGGTCGGGGTAGGGAGGACAGCATCA  
GTTCCCTTCTAAGGAAGGGCCCTGGACACTGCAGCAGGCAGCCAGTCCAGACTGCC  
CATGGCCTCCCAAGTATGCCCTGGC

>365

CTAGGGAGGGTATTAGGGGAAAGGGCTTGAGGGCCACAGTAACTGGACAAGTTTTT  
CTGCCAGCCTAGGCTGCCACCTGTAGGTCACTTGGGCTCCAGCTATGTGGCTGCCTCT  
TCTGCTGGGTGCCTTACTCTGGGC

>366

GCTCCAGGAAGAAGAGGGAGCTGTGGGAGTGCCTCACCTACCCCAGCATCCTTTTC  
ATCTCCCCACAGGGCTTTTTGGTCTGGTGAATAATGCTGGTGTGGCTGGTATCATCGGA  
CCACACCATGGCTGACCCGGGA

>367

AACCCATGTCCCTCAAAGTCCCTCCCTATAGGGCAAGAACCCAGCAACTTCGCTCTG  
CCCCGACTCTAGGCGGGATGTAGCTCATTTTGGGATACGAGTCTCCATCGTGGAGCCTG  
GCTTCTCCGAACCCCTGTGACC

>368

CGAGCCTGACTCCAGCAGGCCTGCCTTGGGGCTGGGGCTGGGGTGGAGGCCAGCCAG  
TGTCTCCCATAGTGGCCGAGAAGACCAAGGAGCAGGCCAACGCGGTGAGCGAGGCT  
GTGGTGAGCAGCGTCAACTGTGGC

>369

CCTGGTTGCAGGGCAGCTAGGGGTCTCTGCATTCTCCACATGGTCTCATGCCCCTTTT  
GTCCCCTACAGGAGGACTTGAGGCCATCTGCCCCCAACAGGAGGGTGTGGCATCCAA  
AGAGAAAGAGGAAGTGGCAGAGG

>370



TCAGCCCACTCAGGGTGGCCATTAAGGCTGGGGCCTGGAGCTGGGTGTGCAGGTCAT  
TCTCTCTCCAGGCCAGAGTGGGGGAGACTAGAGGGCTACAGGCCAGCGTGGATGA  
CCTGAAGAGCGCTCCTCTGCCTTGG

>371

CGGCCAAGCTGCTTGTACCTGTGAGTGCTTCCAAGGAACCGGATGTGGGCTCCCCA  
CCCTTACCCAGCATCTGGCACAGCTGAAGGCAGATGGAAATATTTACAAGTACGCAAT  
TTGAGACTAAGATATTGTTATCA

>372

TGAATTTGAATGACTGATAATTTAATTTATTTTCAGTCAATTGTTACGTATGTTTTCTTTTT  
CTTCCCAGGACATGGTGACCCAGGCATCTCTGTATCTGTTTGAAGCTACAGGAAAGCG  
ATTTTATTTCAAAAATGTTG

>373

CTCCAGTACGAATATGGTTAATTCATTTGCTGAAACTTTGTGATGATAAAAACTTTTTCT  
TAAATTTACAGGCTGATGTTCTGGTTGCTGAGTCTACTCCTCCAGGTAATGATGAACCCT  
ACACTGAGCAGATGGGCAACT

>374

TTTCTTCCAGTGTGAGAAGGTAATTTGCCATTCTTATTGTAATCAGTTTTTTAAAATACT  
TTCTCACAGGTAAGGCATTTGTCCATGAGTGGGCTCATCTACGATGGGGAGTATTTGAC  
GAGTACAATAATGATGAGAA

>375

AACTGAGCATAGACTCTGACCCTTTGAAATGACGACATCACCTAAACATCTAACCTTCC  
TATATTTTCAGATGTTTCAGCAGGTATTACTGGTACAAATGTAGTAAAGAAGTGCAGGG  
AGGCAGCTGTTACACCAAAGA

>376

GTCTAACAAATTATTAATATTCTACCACATAGTTTACCATTATCTATATAATTTTCATTGAC  
AATTTTCAGATAGTTGAATTCTGTACAGAACAAAACCACAACAAAGAAGCTCCAAACAA  
GCAAAATCAAAAATGCAATC

>377

CCTATGGCCTTTTCTGTTATTAGTCTTTCCATCTAAACGTAACCTGTTTTTCTTTTGCTTC  
TCCATTTAGACTGGTAACCGCCTCAATCGACTGAATCAAGCAGGCCAGCTTTTCTGCT  
GCAGACAGTTGAGCTGGGGT

>378

TAAGCAGAATTTTCATAAACACTTTGGCCACCCTAAGTCTGATAACTCGTGCCCTAAAT  
TCTGTCTTAGGTGATTAGGAAGAAATATCCAAGTATGATGAAATTGTGCTGCTG  
ACGGATGGGGAAGACAACACTA

>379

AACAACAGCTAAAATGTTGCAAATAGTTGCTTTCTGGAAAATAATTTCTGAAAATGTAA  
TTGCATTTTAGGAGGTTTACAGACATATGCTTCAGATCAAGTTCAGAACAATGGCCTCA  
TTGATGCTTTTGGGGCCCTTC

>380

GGGCAGAAGGGAAAAGACCATGTGATGGGAGCTGTATTCTCCAGAAAAGTAAGAGCTG  
TTTTTCTTAACAGCTTGAGAGTAAGGGATTAACCCTCCAGAACAGCCAGTGGATGAAT  
GGCACAGTGATCGTGGACAGCACCG

>381

CGTGACATTGAAGTCAGGTCTGTGTCACCTGAAGTTATTCATTGGAAATGTTTACATGT  
GTTTTGGTCAGGTTGGCACTTGGAAATACAGTCTGCAAGCAAGCTCACAAACCTTGAC

CCTGACTGTCACGTCCCGTGCGT

>382

ACATATGAGTTGGAAATATACAAATACCCTCCCGTTACCTATTTATTAATTCCTTCATTC  
TTTATCAAGGTGCTGATGCTACTAAGGATGACGGTGTCTACTCAAGGATTTCCAACT  
TATGACACGAATGGTAGGTA

>383

AAGAAAACAGACGGAGGTGTCACCATTTAGTGATGTTGCTTACCATATTTTGAGTATTT  
TTTTAATGCAGATGAAATACAATGGAATCCACCAAGACCTGAAATTAATAAGGATGATG  
TTCAACACAAGCAAGTGTGTTT

>384

AAGCTCTACTGCTTAAGAAGTTTCTTTAATATTTTTCAGAAATTAAGTCACATTCTTCTTTT  
TTCTTTTTAGCTCACAAGTATATCATTTCGAATAAGTACAAGTATTCTTGATCTCAGAGAC  
AAGTTCAATGAATCTCTTCA

>385

GGAGACAGAGGTGGGCAGCTGTGGTCTCCCCTGCTTCCCTGGCTCAGCTTGCAATG  
TGATTCCTTCAGAAGTTCCTGAGTGGGTGAACACCCCATCCACCTGCTGCCTGAAGTAT  
TATGAGAAAGTGTGCAAGGAG

>386

AGAGGTGGGGTGGGCACCGGACTCCTGCCGAGTCTGCAGCCCATGACGGTCTAATT  
CTGCCTCTGCAGCTTCGTCACCAAGAGGAACCGAGAAGTCTGCACCAACCCCAATGA  
CGACTGGGTCCAAGAGTACATCAAG

>387

GCTCATTTTTCTGTGTGTCATTTGGATGACAAAAAATATGCTTATAAGCTTTCCTCTTTT  
GTTTTTATAGGAGGAAAGAATGGAATGATTTCTGAAAGGCCAAAAGAGAGTATGTAT  
TCCTGGAACAAAACACTGCAGAGA

>388

TATATAATTTCTTAAAATTTATATAATAAACTGTAGATTTCTCATGCTTATGTATTTCCCTTT  
TCTTTAGTGTGTTGACTCCACCTTACAGTCTTCTGACTTTGAACCCTCTCAAGTGTCAA  
ATCTGATGGCACCAGCGC

>389

TTAGACAGAATTGAACATATAATTTACGGCAATCTTATGCATAATAATGATTTGTATGTCT  
TTGTTTTAGGAGAAAAGCCTTTCAGCTGTAGCTGGAAAGGTTGTGAAAGGAGGTTTGC  
CCGTTCTGATGAACTGTCCAG

>390

GTACCAGGCTACAGGACCTAAGCTAATCTCCCACTCCTGCTGTCCATCCATTATGTTGCT  
TTGTCCCAGGTGGTAGGTGAGTGGAAATTCAGCAGGATTCAGTGTGACATCTTCGTC  
ACTCTGGACGTCATGATGTGCA

>391

GTGTGTGCATATTGTGGAGTGAGGGTCCCTGGGCCTGCACCCAGATTCAGGGTCCC  
CCGCCCTTGAGGTACACAGCTGTGGCCATGCCATGCTGTACAATACGCGCTACAGCT  
CCAAGCGCCGGGTACCGTCATG

>392

ATGGGCTCTTGTGGAATTATGGCCGGTGGGCCGCTGACTCCCTGCCTGCCCGGGCTCT  
CCCTCCCCAGACCAGAACGAGTGCATCATTGCCAACCCGGCCTTCGTGGTCTACTCC  
TCCATCGTCTCCTTCTACGTGCC

>393

GCACTTTGGGTTTCTGTCCCCCTCCATCCCCACCACTTTGTGTGACCCATGTGCTGGC  
TCACTCCACAGGGCAACTGTACTCACCCGAGGACATGAAACTCTGCACCGTTATCAT  
GAAGTCTAATGGGAGTTTCCAG

>394

CCAGTGAGATGGGTGGCTGATGCCTGGGAACTTGTCCGGCTTTACCCAGAGCCCTCTG  
CCTCTGGTGCAGGAGGCTGCCCGCGAGCCCAGGAGCTGGAGATGGAGATGCTCTCC  
AGCACCAGCCCACCCGAGAGGACCC

>395

CTGGGTGTGGGTGTTCCAGCCGTGCCTCCCCGGCTCTGGGGACCAGCCTGACCATGC  
CCTCTCCCCAGGCGTGTTCATCATCTGCTGGCTGCCCTTCTTCATCACACACATCCTG  
AACATACTGTGACTGCAACAT

>396

GGAGAAATAGTGCTGCCTAATCTGCTGGCGTGGGCAGTGGGCACCATGAGGACCCTGT  
TCTGTGTTGAGTTTTACCATGGAGCAGCTGAGCTCAGCAAACACCCGCTTCGCCTT  
GGACCTGTTCTGGCGTTGAGTGA

>397

GGAAACACCAAGGAATCACTTTATAGTTTCAAATAAATGGTTGTAGAAAGAAGATTTT  
CTTTATTTAGACTTTCCATTCAACACGGTTGAAGAGGTTCAATCAAGATTCCAGAGT  
CTGAATGCTGATATCAACAAAC

>398

GGATTTTAGAAAACAATTTCTATATGTAGTAGGAGTTATATATATATTTCCTTTTCTTTTT  
TTTAATAGGAGTTCTTGGTTTCGACTCAGAAAACATATGGTGCTGACCTGGCCAGTGTG  
GATTTTCAGCATGCCTCTG

>399

TAATATATTGTCAGTTCAAATTTGGAATTCGATTTGGATTTTTTTTACGCTAACTTGATT  
TTTTTTTAGGAAAATTCGGAACTGTTGGCTTCGGGCATGGTTGATAACATGACCAAA  
CTTGTGCTAGTAAATGCCAT

>400

CTGTACAGAGTCATGCATTGCTCTAAAAGAATGCAGAGAATAATTCAGTGATTTTTTA  
AAACTGTTTCAGAAAGACAGAAAACTGTGAAAATGATGTATCAGAAGAAAAAATTTG  
CATATGGCTACATCGAGGACCTTA

>401

AATAACTTTTATTGCCTTACTTATGTAAAATGATATCACTTCCTCTTTCGCCTCATTTTT  
AATTGCAGATTGAGGAACAGTTGACTTTGGAAAAGTTGCATGAGTGGACTAAACCTGA  
GAATCTCGATTTTCATTGAAG

>402

ATGAGCGCGGCGAGGTGGGGTCTCTAACGGAGCATCTGTTTTAACCCGCCCCTGCAC  
ACACCCAGCAGATCCTGGCCATGAGAGCTCCGCACCTCCACCTCTCCGCCGCTCTG  
GCGCCCGGGCTCTGGCGAAGCTGC

>403

AGCCCAGCTCCAACCCCAAACCCAGACCCTGCCCTCCGTGCTTTGATTCCGTCCCCTTT  
CTTTCTCCAGCCGAGAGGCGGCTGCTCCCCAAAACGACACGCGCTTGGACCC  
CGAAGCCTATGGCGCCCCGTGCGC

>404

GCTTCACTGCCACCTGCTTTCCAGTCCCTGTGAAGGGTTTGCCTTCACATGCCTCTT  
CCTTCCCCAGGCCACTGTGGGCTCGAGTAGGGGATGACCACCTGCTGCTTCTTCAGG

GCGAGCAGCTCCGCCGGACGACT

>405

GTATCTGGACTCCTGGCTCCCAAGGATTGGGGGCTGGACCCAGGGATTACTGGCATAT  
TCTCCCTTCAAGTACAACAAGGGCCTGACCTGCTCCAGCATCACTATCCTGAGC  
CCTAAAGAGTGTGAGGTCTTCTA

>406

GCCCCAGATCCCAAAGTGACAGCTCTCACGTTGGCACATTTATTTGATCTCTCCTTTCT  
GCCACCCCAGAGTGACTCTGGAGGCCCTGGTCTGTGACGAGACCCTCCAAGGCA  
TCCTCTCGTGGGGTGTTTACCCCT

>407

GCAGGGGTCGCGGCCCTCCAGCATGAATGTGCCCGCTCAGCCGACGTCTCCCTTCCCG  
GTCTGACCGCAGGTATCTGGCCATCCGCTACCCGCTGCACTCCCGCGAGCTGCGCACG  
CCTCGAAACGCGCTGGCAGCCATC

>408

ACGGAGGTTTTGAGGCGGGGTTGCAACTCCAGGGGTGAGAGCTGACGAACTCTCTTC  
TCCCCACCCCAGGAGCTGGACACCCTATGAAGCCTCATCGCCTGGCATTGACCCATA  
GCCTGGTCTGCATTACGGTCTCTA

>409

AGTATGGGTGGTCTGAGCCTGTGGAGTGGGGCTGACCCTGCCTGGGTTTCATCTTGTA  
TCCATCCCGAGGTCTTCAAGCCATACCAGGCCTCCAGCATGACATGTGCCGTTCCAC  
TCCGAGGACTACATTGACTTCC

>410

ATGGGGAGGGAGATATGGGAAGGGCCAGACAGAGGCAGGAGGGTTCCAACCTGTTC  
CTCTTCCCTGCAGCCAGTGTTCGGGGCTCTTTGAGTTCTGCTCGCGTTACACAGGC  
GCATCTTGCAAGGAGCAACCCAG

>411

CCCGGTGTTTGAGAGGAGTGGGTGGGGGTTCACTTCTAGCTCAGACCCTGGCTTTG  
GCTTCCCTCTAGGTACCACCCTCGGGTGTCTACATTGACATTGACATCCACCATGGTG  
ACGGGGTTCAAGAAGCTTTCTAC

>412

AGATTGGGGCTGAAACAGCTGGGTTGTGGGTGCTCCCATGTGTGGCTACCACCACCC  
ACTTCCCTACAGGTGACATGTATGAAGTCGGGGCAGAGAGTGGCCGCTACTACTGTCT  
GAACGTGCCCTGCGGGATGGCAT

>413

CTTTTCTTTTGTTCCTGTCTCCCATCCCCTGGGGTGCCAGGTGCCATCTTTGGC  
CCTCTCCAGGTTACAAGCACCTTTTCCAGCCGGTTATCAACCAGGTAGTGGACTTCTA  
CCAACCCACGTGCATTGTGCT

>414

CAATACCTAAAGGTATTTACCTGTCTTTTGATAACCTCCTCCACATCTTCTCTGGTTC  
CTTTTAACAGGGAATGCGTTGAATATGTCAAGAGCTTCAATATCCCTCTACTCGTGCTG  
GGTGGTGGTGGTTATACTGTC

>415

GAAAAAGATTGGGAAGTCTTGTTAGCTGCCTTTCTCAGTCTGAGCCATACTTTCTCCTC  
TCCTCCCAAGAATACTTCGAGTACTTTGCCCCAGACTTCACACTTCATCCAGATGTCA  
GCACCCGCATCGAGAATCAGAA

>416

GCAGCTAGGAGATTCCATGTCCTGGGAATCTCTGGAACTGCTCACTCTGTATTCCTCA  
TTTCCAACCAGTATCTGGACCAGATCCGCCAGACAATCTTTGAAAACCTGAAGATGCT  
GAACCATGCACCTAGTGTCCAGA

>417

TTGAAAAGGGTGCTGGGAGAAGATTAGAACTTAGAGTGAGATCCTGACCTCTCTCCC  
CTTGCTTTGCAGGCCAGAGGCACCCAATGAGTTCTATGATGGAGACCATGACAATGAC  
AAGGAAAGCGATGTGGAGATTTAA

>418

CAGGTAGGGGATGGCCCTGCCTCTTGTCAGCCAGAGCAGCAGCAACCTCTCTTTTCC  
TTTCCCTTACAGGAAGCTGCACAGTGGGATGAAGACGTACGGGTGCGAGCTCTGCGG  
GAAGCGTTCTGGATAGTTTTCGG

>419

TGTGGCCAGGACCTCCCCGCTCACCAGTGGACTATTGCTCTAGTGGTAACTGCCTCTC  
CTTTCTTTCAGCGGGTGCCAAAGCCTTTGTCTGTGATCAGTGCGGTGCACAGTTTTCGA  
AGGAGGATGCCCTGGAGACACA

>420

CTCCAGATGGGTAAAGAATGCACCTTGATTCCACCTTCTGAGGCACCCCTCTCCT  
GTCTCCACAGGCACTGACATGGCCGTCTTCTGTCTGCTGTGTGGGAAGCGCTTCCAG  
GCGCAGAGCGCACTGCAGCAGCA

>421

TGTGCCCTACTGTCCCCTGAAGAGGGGGCAGGGAGAGGCAAAGGCCTGATCCAGCCC  
CTTGCTCCACAGGCGACCACCCCTACGAGTGTGAGTTCTGTGGCAGCTGCTTCCGGG  
ATGAGAGCACACTCAAGAGCCACAA

>422

AGGGTGACATGGTGCCTCACTGCCTTCTGTCTGTCTCACTTCTCCTGCCCTGTCCC  
TCCGCCCTCAGGTGAGAAGCCCTTTGAGTGAAGCTCTGCCACCAGCGCTCCCGGGAC  
TACTCGGCCATGATCAAGCACCT

>423

GGGACTCTGGGAGTCTGGCCAGCCCCAGCTGCCGTCTTAGCTGGAGGGGCTCCCTCCC  
TTCTCTTGCAAGTGCTCCAGAAAGCAGGAGTTGAAGACCTGGGTGTGAGGGACACA  
TACATCCTAAAAGCACACAGCAGA

>424

GTCATTCTGGTGCCTCATGGCTCTGCCTGCCAGCTGTGCCCCGAGGTGCTTCTCGCG  
TCCTTCTACAGTTCCAGAAGACAAACCCCTAGGAAGACAGGCGACCTGTGAGGC  
CCTAGAGCACCACTTAAGAGAAG

>425

TTATCCCCTCGTCTCCTCCTGTTTTTCTTCTCATCCTCATCCTCCTCTGCTTCTGC  
GTTCTCCAGGGACAAGGATATGCCTACTGCTGGGATGCCGAGTCTTCTCCAGAGTTC  
CTTGAGAGTCTCAGAGTTA

>426

AGACTCATTCTTTTTTGTCTCTTCTGTCTCTTGTGTGTCTGTGTGCCTGTACATACCC  
CTCCCTCAGACTCCCGAAGCCAGACAGCTCCTCCCAAATCCCCTCCCGAGGAGT  
CCCTCCCCCTTCTCCTCCTGG

>427

TTCCATCACTTCTGTGACATTCTGCTCCCAATAAGTCTTCTGTGACTTCCCTATTTCC  
CCCATCCCAGATTAACCAACAGTGTCACTCCCTGGGGGTGGGTCTGGCCCCCTGAA

GATGTGAAGCCACCAGTCTTAG

>428

ATTGGAAACAGACTAAATGGTGAAGGTGTCTCCATGCAACCTTCTTATTGCTCCTCCCC  
TTTCCCTGTAGGCCAAACTACGGGGTTTACAGCTGTGAGGGTTGCAAGGGCTTCTTC  
AAACGCACCATCCGCAAAGACCT

>429

GGATATTTGTGGAACCCCTTCATGGGTGGATGCTGACTGTACATTTTTTCTGTCCCCCTT  
CCCCCTGCAGCGGTACAGGAGGAGCGTCAGCGGGGAAAGGACAAGGATGGGGATGG  
GGAGGGGGCTGGGGGAGCCCCCGA

>430

AAAGCCTTTACAAGGGGGCTCCCAGCATATCTCAAAATCTTCCATAACTCTTACCCCC  
GTCCCCTGCAGCAAATGACCCTGTGACTAACATCTGTGAGGAGCTGACAAACAGCT  
ATTCACGCTTGTTGAGTGGGCGA

>431

TCTCTTCCACTGATGTGCTTTGAATCCCTTGGCCTGATTTCTGGCTCCTGACCCTTGCTG  
CCCCACCCAGGCTGGAATGAACTCCTCATTGCCTCCTTTTACACCCGATCCATTGATGT  
TCGAGATGGCATCCTCCTTGC

>432

GCTATAGGCTGGTCCGTGTCCAAGGCTGGCTGAGCTGTGACCTTTGAGTGACCTGCAG  
GTCCCTCTCCAGGGTGTGACAGAGCTAGTGTCCAAAATGCGTGACATGAGGATGGAC  
AAGACAGAGCTTGGCTGCCTGAGG

>433

CACATCTGCATGGCCATCCTGATTTGGTTTGTCTTCATTTCTTCTCCTCTCTTCCCTG  
CCATCCCAGATGCCAAGGGCCTCTCCAACCCTAGTGAGGTGGAGGTCTGCGGGAGA  
AAGTGATGCATCACTGGAGAC

>434

GTGCTATGAGGATGTGTTTCAAGGGCCCGTGTGCTTCCAGCTCTCAATCCCCTTCTCCAC  
CTCCACCCAGGTTTCCAAGCTGCTGCTACGTCTTCTGCCCTCCGGTCCATTGGCCT  
TAAGTGCTAGAGCATCTGTTT

>435

GCCTCTCCTCTGACAGGGCCTCTCATCATGCCTATGCCTACTTCACCTCTGACTCCTGCC  
TTGGTTACAGGAGGTGGAGGCCGAAAGGTGCGACCAAGAGAGAAGCTGCTGCCAAC  
ACCAACCGCCCCAGCCCTGGCGG

>436

TGAGTGGGAGAGGCAGAATTAGAACCCAGATCTCTGTCCCTTTTACCACCTGCTTTTCC  
TCACCCCCAGATGAGGCCAGACCATGGACACTACACCCAGCAATAGAGACGGGACT  
GCGGAGGAAGGAGGACCCAGGACA

>437

GCCTTGCCCCCTCCGATTACAGGCCGATGGGGCTTGTAGCCCCCTGACCCTGCCCGTG  
TCTCCCTCGCAGCTGGGCGCCGTGTACACAGAAGGTGGGTTCGTGGAAGGCGTCAATA  
AGAAGCTCGGCCTCCTGGGTGACT

>438

GGGACAGGGGACCGGCTGGAGACAGGGCCAGGCGGGGCGTCTGGGGTCACCAGCCG  
CTCCCCATCTCAGTCTCCCGGACCTGCCCGTTATGATCTGGATCTATGGAGGCGCCT  
TCCTCATGGGGTCCGGCCATGGGGC

>439

TGATCTCCCCTCTGGAGGCCAGGCCTGGGCCACTGGTCTCTAGCACCCCCTCCCCTG  
CCCTGCCCCAGGTAATATGGCCTTCGGGATCAGCACATGGCCATTGCTTGGGTGAA  
GAGGAATATCGCGCCTTCGGGGG

>440

GAGGCAAGGGGCGGCTCAGGGGAACTGGGAGGTACAAGAACCTGCTAACCTGCTG  
GCTCTCCCACCCAGACCCCATGCTGCACTATGTGGGCTTCGTCCCTGTCATTGATGGAG  
ACTTCATCCCCGCTGACCCGATCAA

>441

GCAGGTGGAGAGCAGGGCTTCAGCCCCCTGGGAGTCCCCAGCCCCTGCACAGCCTCT  
TCTCACTCTGCAGGGACCCCAACATGGGCGACTCGGCTGTGCCACACACTGGGAAC  
CCTACACTACGGAAAACAGCGGCTAC

>442

CCTGGGGAGGGTGGGATGCTGGGTGGGCTCTCCTTGCCTGCTTACTTTCGTCCTCCTT  
CCCCTGCCCAGGGGTGTGGGGTACGGATACAGAGGAGCGGCTGGTGGAGCATCTCCT  
GGATCCTTCCCCTACAACAAGCT

>443

AGTTCGTTTTCTTAACCTTGAGCCCCACCCAGGGCACAAGTTGGTACTGCCTCCCTCTC  
TCATTTCCAGGAGTGGGAAGATTATCGCCTCACCTGGAAGCCTGAAGAGTTTGACAA  
CATGAAGAAAGTTCGGCTCCCTT

>444

AGGGGCTGGGTTGATGGGTAAGGAGGAAGGAACGCTTAGGCCAGGGCTGACTGTGCC  
CATCCTTTGGCAGTGCTGACGGCATGTACGAGGTGCCTTCTATTCCAATGCCGTGGTC  
TCCTATGATGGCAGCATCTTCTGG

>445

ACCCGCTTATACTCGTTTGTCTCCCATCCTGCATCATGTGACCTGGGCCTCCTCCGTCTC  
CTCCATCCAGGTGAGTGAGGACTGGAAGTACGTCCCATGGTGATCGACCGCCTCTTC  
CTCTGGATCTTTGTCTTTGTCT

>446

AGTGGCAGGGATCCTGGCTGTCTCTGCTGTGTCCCTGCCTCTGTACCTGAGTGTTTCTA  
ATGACTTGCAGGTGGAGCTGGAGACCTGGTCTCTCTAGGGCCTACCCTGAGCTACCA  
TCTGAAGGAGAGTGCCATCATCC

>447

TCCCTGTAAGTCTCTCCGCACTTTCACACCCACCTCCACTCCAGCCCTGATTCTG  
GCCTCCACAGCCAGCGCAGACTGTCCGAAGCTCTGAAAAGGCTACGTTCTGGGCCT  
AAGTCTAAGAACTGGGTCTACAA

>448

ATGAGGTGGCTTGAGGGGCAGGGAGGGGGGCGCAGGGCTCTGCATACCGGATTTCCC  
ATCCCTGTTTACAGTCTTGGAGGTTTTGCCCTGAGCACAAGGAGCCACCCTGCC  
TCGGACAGCCACGGCACCTCCCTG

>449

TCATCCAGGCCAGCTGCCCCCTGTCTTTCATGCCCGCAATGCCTAAAGGCGCTTCCC  
CCCACCTCCAGGTCCAGTGGCTGTCAAGTCCCTCCGGGTAGGTCCCGAAGGCCCGAT  
GGGCACAGAAGTGGGGGACTTCC

>450

GTGCGGCAGGAGCGTGGGCGGCCAGGGTCCAATGGGTCCGGCTCACGCGGCGCGGTG  
TTCCCTCCTGCAGGTGATGGAGCTGGCGCCACTGGGCTCCCTGCACGCGCGCCTAACG

GCCCCGCCCCGACCCCCGCTGC

>451

GGTGCTCCGTGGAGGGTGGGCTCCAAGGAGCACGTGTCCCGCCCCTTCAGCTCCAC  
TTCCTTCGGCAGGTGTGCCCCAGAGAGCCTGCGCCACGGAGCCTTCTCGTCTGCCTCG  
GACGTGTGGATGTTTGGGGTGACG

>452

ATTCCTGCTCCCATATTACCTATCTGACTCAGGCCACAAGCCCAGCCACCCTTCTCTT  
GTCTCCACAGGCCGGCCTTCGGAAGCATGTTGTGTGAGGGATGTCACAGAACCAGG  
CGCCCTGAGGATGGAGACTGGTG

>453

CTGTGGGCCAGGGCCCAGCCCTAACTCTTGCCCTTATTCCCATCTATTTACCAGCTCCT  
CTTTCCACAGCCCCGACTCCACAATCTGGAAGGGCCAGAATGGTCGCACCTTCAAAGT  
GGGCAGCTTCCCAGCCTCGGCA

>454

TGGGAGGGTATATTGATCTGTGGGGTGGGGAGAGTTGGTGTGGAGGATGAACTGGATC  
CCTCTCCGACAGAGACAGAAAGAAGGCAAATCTTTGGGATGCGCCCCAGCACGGGG  
CCAGAGGAGGAACATGCCCTGGAG

>455

GATCGCTTGAGCCCGGGAGGCGGAGGCTGCAGCCAGCCGAGTTCAAGTTGTTTCCTTC  
TCAACTGTGCAGGCATTTCCAGGAGTCTGGAGTCAGTTCTGTCCCTCGGTCTCGTCC  
CACAGGGGGTGGTTCAAGCCCCC

>456

GAAATGGCCTGGTGTCCAGAAGGGGCTACAGGCAGGGGCAGGGCCTGAGTGAGGCT  
TTGTCTGTACAGATGGAGCTGAGTGTGCATGGGGTACCCACCAGGAGTGCCAGAC  
AGCACTAGGAGCCACTGGGGGAGATG

>457

TCTTGGGGTCCCTCCTCTCCTGCCCTGCCGCTGGCAGTCAGCTGCAACCCACCCTC  
CTGCTTCCACAGGTAGATCAGCTCTCCACCTGAGTAGCCGGTCCAGAGCTGACTGCT  
GGCGCATCCTGGAGCATTACCAGT

>458

GTGAAGCCAGCAGGTGCTCTGGAGTTAAACCAGCTTTCTGCAAGCCCTGCTTCTGGT  
CTCCCTCTCCAGGTACTGGCTGTGATCGAATTCTCAACCCTCAGAGACTTAGATCTTC  
CACCTCACTCCCTCAGCCAAGCC

>459

CAGGCAGAGCTGGGTGACAGGCCTCGCACTGCTGGCCCTACCTGTAAGTGGCCTGTT  
GCTGTCTCTAGCACAACTCTCAGAGCCCATCCCACCCAGCAGTTCCATTGCCTACA  
GCCTCCTGAGTGCCAGCTCAGAG

>460

GAGGTCTGGGGGCCAGGCCACACTCTGGGACTAATGTCTTTATCTTTTCTTCCCTGT  
GGGCCCCGCAGCAGTGAACAGTCAGCCCGGGCAAGGACTCAGAAGGAACTCATGAC  
AGCACTTCGAGAGCTCAAGCTTCGA

>461

ATGGCCTGGGCCTGGGCTCCCGTGTGAGGCAGCCTCCTTACTGAATGCCTCACTGCCT  
CCTACTCTGCAGCAACCAGGAATACTACCAGCAGTGGAGCCTGGAGGAGGGCGAGCC  
TTGCTCCATGGACATGTCCACCTA

>462



GCATCCCGACGCACCCCTACTCCTTCTCCACAGCTCTGAATCTGCTCTTGCTCTCCC  
CCTCTGCCAGGATACCTTCTCAGTGGCTGTCTCCTTCTGACGGGCCGAATCGTCTAC  
ATTTCCGGAGCAGGCAGCCGTCC

>463

GTGACCTTATTGTTGGAGGAGTGGGTGGCTCTCTGTTGAAAGTCCCTAATGCTCCTCTC  
TCCTTTGCTAGAGGAGGTCTGACCGGGATCCAGGGCCTCGGTACCAGCCATTCCGCC  
TAACCCCGTATGTGACCAAGATC

>464

AGGCAGAGTGGAGGGCTGAGGAGTTGGGCATTCTGGACGAAACCCAGTGACCACACT  
CTCTGTGCCTCAGCTCCCCGGATACCCCTGACAAGAGGATTTTCACTACGCGGCACA  
CACCCAGCTGCCTCTTCCAGGATGT

>465

TAGGACCTAGAGGAGACGAGGGCAGCCAGGGCTGAGGCCACGGCCACTCTGATGCCT  
CCTTCCCGTTACAGGGCTGCCCCCTGCTGGGTACTCTGCCCCAGGACCTCCTGGGGGC  
CCCAGTGCTCCTGTTCTGCATCCT

>466

GCGTTGGGGATAGGGCAGTGCGGTGGGGGACAGGACCGGGCCAGGGCTGGATTCACT  
CTTCACTCTACAGGGCCCCCTGAATGAGGACGTGTTCACTCCCCGGCCCCAGCCC  
AGCTCCCTCCCTGGACACTGATATC

>467

GAGCCTGGGAGGTGAGAAAAGGTGTGGGAAGCGGGTCAAGCCATCTAACCTGCCCT  
CTCCCTGCTGCAGCCCGTCCACAGCCCCAGCCCCACGGGACTCTGTGGAGTCGGCGCC  
GTGACATCCCCAGGCCCTCTCCACA

>468

CCAACCCATTTGCTGTTTTTTTCCATGTGAGCTTGAGAAGGCTATTTTCTCTTTCTCTC  
TTTGCCCCAGCTACAGGCACGTTCAAGGCCAAGGCCCTTCCCTGCCAATCCCCAGACC  
CAGAGCTGGAGGCGGGTTCTGC

>469

CTCCACCTCGGGCTCTAACCCCTGCCACCCCAAGCCCTGCTCTGATGCCCTGTGCTGTG  
TCCATCCCCAGGTACCTGGAGAGCTGCAACCTCCCCAGCACCTAAGCGTAAATGTG  
CCTCCTCCTCCTATACCACC

>470

TCCTGGGATCCTCTCTCCTGACTTCCCAGTGGGGGTGGGGATGGTAACTGGCACCATC  
TCTCTGCACAGATCCGCCGTACAGCAGCGTGTCTGGGGAGGGGGCCACCCACGGAA  
GGAGCCAGTGGTGGGAGGCACCCT

>471

GAGGGTGTGGTATGGATGTGTTGACCCCTGAAGTGGTTCTGATGACCTTCCCTATCTC  
ACTCTCCTCAGACATCATGATGGAGGACCTGCCTGGTCTAGCCCCAGGCCAGCC  
CCCAGCCCAGCCCCAGCCCCAC

>472

AGGGCAGTGTGGGTAGCAGGGTACTAACCCAGGTTGAGGTCTTGCTAACCCTAGT  
CTCTCCCCACAGGCTGCCACCACGGCCCCGCACCCCAAGCCCGACACCACTGCC  
GATCCAAAGCCAAGCGCTCACGCCA

>473

GTAAGAGCAGTTGAAGGGAGGCCTAGGTGCTGACCCCTCCATCCCTCCTTGCCCCCT  
CCCCTCCTCCAGGCGGAGGTCACTGAGTCTCCAATCAGGACGCACTTTCCGGCTCCA

GTGACCTGCTCGAACTTCTGCTGC

>474

GGCCTTGTGAGGTCCCAGGAGTGGGCATGCAGCCGGCCTGACTCCCATTGGTCTGCCC  
CCCACCTTACAGGCAGCAGCCAGAGCAGCCACACAAGCAAATACTTTGGCAGCATCG  
ACTCTTCCGAGGCTGAGGCTGGGGC

>475

TGCCAGCTTCATGGGTCCTGGTCCGGGTCCTGGATCCCAGCCTCTGCCTTCTGAACCCC  
TTCTTGGGAGGGACATGACCTCTGTGCTGAAGCAGGATCGGGAGCGGCTCCGAGCCA  
TGCAGAAGCAGCAGCCTCGGTTT

>476

GGGAAGCTGCGCTGGCAGGTTAGCAGTGAGAACCCTGTCTGACTCTCTCATGTCCATT  
TCTCTACCAAGGCTGTGTGGACTGTGGGAGCAGCACCCAAGATCCTGGTCACCCTG  
ATGACCCACTCTTCTCAGAGCTGG

>477

CACTTGGGAGGGGGCAGGGGAGCCCAGGCAGGCCTGGTGGGGAGCTGACCCACCGC  
CGTTTCTCTGGCAGGTTCTGACGCGATGAGGAAGCACCTGAGCTGGTGGTGGCTGGCC  
ACTGTCTGCATGCTGCTTTCAGCCA

>478

TATCTCACAACAGGCCAATGTTGGCATCTTTGGACCTTTCTAAACATCAACATTTCTGT  
TTTCTTTAGGAATCGTCTACGAAGCCTGATAAAAAGGTTTCTGTCCCATCAGGACAGA  
TTGGTGGCCCCATTGCTTTGC

>479

TGCCAGGTTTGGTGTGAGTGAGCCACGAACAGGACTGGAGTTCTTACCGCTTGCTGTG  
TTTCTTCCCTAGAAAGGAGCGAGTGGGACTGTGCTGCTGGCCGGCTCCTCTTTGATGG  
CTTACCCTACAAATCCAGCAGCC

>480

GGAGCTGCTTTCCTGTTCTGTCTTCAATGTGTGTGTTTTGTTCTTTTCTCCCCTCCTGT  
TTTCTCTCAGGTCTTCTGGCTGGCTTGCCTCCAGCCCCGCCCATGCAGCGCTCTCCC  
ACACGCTGCGGTGCCACCCA

>481

GTTACTACTGCCTTAAGGAAATCAGAGAGCATGAAAACTTGCCTTCTAATTTTTCTTA  
CTCTTTTCCAGGTGCTTCTCAGCTTCATGGGAAAGGGCCTGCTGTACCACGGAAATTGT  
GACCGCTTCAGAGGCAAGGCTT

>482

AGTAGCTGGGAGTGTAAGGAGAGGACCCTCGTCCCCTACCAACCTCATCCTCTCTCC  
CCCTACCCACAGGTAGCCTCATGGCTGCAACCTGTGAGATTAGCAACATTTTTAGCAAC  
TACTTCAGTGCGATGTACAGCTC

>483

AAAAAAAATGGGGCTGTAAGGTCTGCTGGGTGGCCTGAGCTGAGCCTGTTCCCTGCC  
TGCCCTTGACAGAGAAGGCCAGCTGGTTGGGGGAACAGCCCCAGTTCTGGTCGAAGA  
CGCAGGTTCTGACTGGATCAGCTA

>484

GCTGCACAGCCAGAGAGAGCCCTTGAGGGAGGGATTAGGGGAGTGTGACCCTTCCTT  
CCTTCTTGTACAGCTTCCAGCTTCTGTATGAGCTCAGTTGGATCATTGAGCTGCTGGA  
GAAGGATGGCATGGCCTTCCAGGA

>485

CCATGGGCAGCATCACCTGTCCTGGTCTGGTCCCCTGAGCCCTCTCTGAGTTCTCACCT  
CCTCTTCCCAGACCAGGGCAGCCCCTTTGCCAGGAGCTGCTGGACGACGGTCAGCA  
AGCCAGCCCCTACCACCCCGGCAG

>486

CCTGAGAGCCAGCAGCGTGGTTGAACAGAAGGTGGGCCGCGCAGGGGACTTACTCTGA  
CCCCGCCCCCAGGGACTGGTGTCTTCTCGGAGCTCCCACTCCTCAGACTCCGGTGGAA  
GTGACGTGGACCTGGATCCCACTGA

>487

TCCTGTAGAGGGGCTACTCTCCCTAACTCCCCTCTTGCCCCTCCTTGACCTTCCACCAC  
CGTCCCCACAGATGGTTTTCTGACTGCAAGAAGGGGGATCCCAAGCACGGGAAGCG  
GAAACGAGGCCGGCCCCGAAAGCT

>488

GGGCAGGGCTGGCTGGCCTTGGGTGAGAGGGGACACCTGGATGGCAAACCTGATGGAG  
GCTGGCCTTGCAGCGCCAGAGGCACCCACCTGTGGGAGTTCATCCGGGACATCCTCA  
TCCACCCGGAGCTCAACGAGGGCCT

>489

GGTGGGCGGGCTGGCAGCCTGGGGCCATTTCTGCCAAAGCACCTCTGACCATCCTT  
CTTTACCCAGGTACTACTACAAACGGGAGATCCTGGAACGGGTGGATGGCCGGCGA  
CTCGTCTACAAGTTTGGCAAAAAC

>490

CGGTAAGCCCACCCCAGGAACCCTGGGCCCGCCTCCTGGTCCCGATCCCATCCCTGA  
CTCCGCCCTCAGGATCGCTCGTCTCTGGTAGCTGCAGCCAAATCATAAACGGCGAGGA  
CTGCAGCCCGCACTCGCAGCCCTG

>491

GGGGTTGAAGATGAGAATGGAGGTAAGGATGTAGTTGCCACAAAACCTGACCTGCCCTC  
CGTGGCCACAGCTCCTACACCATCGGGCTGGGCCTGCACAGTCTTGAGGCCGACCAA  
GAGCCAGGGAGCCAGATGGTGGAG

>492

TGTGTGTCTGCCCTCTCAAGGAGGTCTCTGCCAGTCGCGGGGGCTGACCCAGAGC  
TCTGCGTCCCAGGCAGAATGCCTACCGTGCTGCAGTGCCTAACGTGTCGGTGGTGTG  
TGAGGAGGTCTGCAGTAAGCTCTA

>493

CCTTTCTGAGCCACATCCATTTCCACCTCTCTGTGTTTTGAATTCTGACTCTCCCTCTC  
TTCACAACAGGGTGACTCTGGGGGGCCCTGATCTGCAACGGGTACTTGCAGGGCCTT  
GTGTCTTTCGAAAAGCCCCGT

>494

GTATGTCCCTAGCCCTGGCTGCTGAATTGTTGCGTTCCTGTTGTGTTTTATTTTCATAT  
TGGCTGAAGACCAAGAGGGAAGAAGCACAGAATTCCTCAACTCCCAGTGTGCCCATG  
AGTAAGAGCAAATGCTCCGTGG

>495

GCCCAAGCTCCCACGAGGAGAGATGGGCCCTTCCGAGGCCCAAACCTAAAGGTGCTT  
TTCTGCCCCACAGGTGCCTTCTGGTCCCCTACCTGCTTTCATGGTCATTGCTGGGAT  
GCCACTTTTCTACATGGAGCTGGC

>496

AGGGACACGTTGCTGATGGTGGCTCTGTGCTCCACCTGCGTGGGCTCCATGGCCTCCC  
CCTTCCCCTAGGTGTGGGCTTACGGTATCCTCATCTCACTGTATGTCGGCTTCTTCT

ACAACGTCATCATCGCCTGGGC

>497

AAGCTCAGCCGTCCAGTTCCAGGTGGGTTGACAGCCACCCACAGAGTCCCCGCTGA  
CTCCCCTCTGCAGACGTGGCGTGTGCACCTCCACCAGAGCCATGGCATCGACGACCT  
GGGGCCTCCGCGGTGGCAGCTACA

>498

CCTTGTGCCAGTGTCTGCTCCCACCAAGGGCCCTGCCTGTGCAGCCTGGTGACTGT  
CCTCTCTGCAGGTGGTATGGATCACAGCCACCATGCCATACGTGGTCTCACTGCCCT  
GCTCCTGCGTGGGGTACCCTCC

>499

GGTGCTCAGGTCCTTTGCCTGTGGCCTGCGTTCTCCTGGGACAGCCTCTACCGCCCT  
CTGGCTCTGCAGGTTTGATTGACGCGGCCACCCAGGTGTGCTTCTCCTGGGCGTGG  
GGTTCGGGGTGTGATCGCCTTCT

>500

AATAATGACTGGAAAATTGCAGCTGCTGCAGCTCAGCTGGTTCCTGAGACGGCGTGT  
TTGTTCTTACAGGGACGCGATTGTACCACCTCCATCAACTCCTGACGAGCTTCTCCT  
CCGGCTTCGTGCTTCTCCTTC

>501

CGGGGTGGGGCAGGATGGGCGGGAGAGCACAGCGTGGGCTCTGTGGCAAGCAGGGC  
GGGTTCTGTTTCAGGGCCAGGGCTGATCTTCATCATCTACCCGGAAGCCATCGCCACGC  
TCCCTCTGTCCTCAGCCTGGGCCGT

>502

GTAGGTCTTGCCCAGGCTGCGGTGAGGAGCGCCGAGCCTGCAGCCCGACCCTGT  
GCTCTGTGTGCAGATGGGTGGTATGGAGTCAGTGATCACCGGGCTCATCGATGAGTTCC  
AGCTGCTGCACAGACACCGTGAGC

>503

TGAATCCCCAGGCTGGGTTTACCTCTGGGGAAAGCCCTTCTGTAGGTCCACAGGCTCC  
CCTCTCTTCCAGGGTGGCATCTACGTCTTACGCTCCTGGACCATTTTGCAGCCGGCAC  
GTCCATCCTCTTTGGAGTGCTCA

>504

TGCCCCGCTCCCTGCTTTGTCTGGCACCGCCGGCTGAGAGCTGCCTGACCTCCGTATCT  
GCTGGTTGCAGTTCGTGGTCGTGGTCAGCATTGTGACCTTCAGACCCCCCACTACGG  
AGCCTACATCTTCCCCGACTGGG

>505

GTGAGTCAGTGGTGGGTGCTGGCAGTGGTACTGGTCTGCACTGACCCCTGCACTCTC  
TTTCTCTTTCAGAACTGGCCTACGCCATTGCACCCGAGAAGGACCGTGAGCTGGTGG  
ACAGAGGGGAGGTGCGCCAGTTCA

>506

TAGCCACCTTCAGCTGCTCTTAAATGGGGCATCGCCCCAGGGTTTCTGACTAAACCTGT  
TTTCTTCCAGCTCCGCCACTGGCTCAAGGTGTAGAGGGAGCAGAGACGAAGACCCC  
AGGAAGTCATCCTGCAATGGGAGA

>507

CCCTGAACAATAAGCACAAATGCAGTTTTAAAGACTGTTTGCTTATTTGATGAAATTCG  
TACTTTTATAGGAGAAATGGGGTACTAAGAGAAAAGCACGAAGCTGTGGATCATAGTTC  
CCAGCATGAGGAAAATGAAGAAA

>508

AGATAAAGCCTAAAGCCCCAACCCAGTTCAGTCTTTTATGTGAAAGATGCACTTTTTGTG  
TTTCTCTACAGAGACATCTGAATGGGACAGATACTTCTTTCTCTGGAAGACTTATTCC  
AGTTGCTTTCATCACAGCCTG

>509

TTGTTAGGTAATAGAACTGCTTCAGAAATAGGGCTATTCATGTTTGAAGTGTTCCTT  
CGTTTTTCAGGGCATCTCATTGGGAGATATTCTCTTCCAGGCAGTATCAGTGATGGCAT  
GAATTCTTCAGCACATTATC

>510

AGAGTAAACAGGAGGCATAGCTGCAGCTTCTGTGGCAGAGCTTGCCTTAACTTCTCAT  
TCTCTTTTAGCCCCAGCCCAATTGCCATCAAGACTCCTGAAGCCAGCTGTGCTTGA  
CCAAGGATGGGCCATAAACAATG

>511

TTCCCAGCTGGGAGGGGGCGGGGACAGGTGTGCGGCTCCTGCTTCTCTGAGGGCCTC  
CCTTTCCCGCAGCTGTGAGGTGGAGCAGTGGGACTCGGATGAGCCCATCCCTGCCAA  
GGAGCTAGAGCGAGGTGTGGCGGGG

>512

GATAGTCCCAGTGCTGTGGCTTTGAGTTCCTCGAGGAAAGATACTAACAATGCACTTT  
CTGCACAACAGGGGCCAATCTCAAAGTCATCAGCACCATGTCTGTGGGCATCGACCAC  
TTGGCTTTGGATGAAATCAAGAA

>513

AAATGTCCCAGCAGTAGACATTGGTAAATATGGTTGAGGCTGATGTTACCACCAGATGT  
TTGATTTCGTAGTGGGATCCGAGTTGGCTACACCCAGATGTCCTGACAGATACCACCGC  
CGAACTCGCAGTCTCCCTGCTA

>514

TGCCGGGTTCTCAGCGGCCCATCTTGGTCCAAGGCTGGGCCTCTCACCTGCCCTCT  
CTCTCCCCTCAGTGGTGGCTGGACCTCGTGAAGCCCCTCTGGCTGTGTGGCTATGGA  
CTCACGCAGAGCACTGTCGGCATC

>515

TCCGGAAATGCTGGGTGGTGTCCCTACCCTTTGCGGGACGGGAACGAGACATGGACTC  
TCCTTGCTCTAGGCCAGGCCATTGCTCGGCGTCTGAAACCATTGGGTGCCAGAGATT  
CTGTACACAGGGCGCCAGCCCAG

>516

GCTGGTCTCCCGCCATCTGTTGTCCCTAGCCTGGGACTCAGTGCCTGATGGAGTCCTG  
CCCTCCCTCAGTGTCTACCCCTGAGCTGGCTGCCAATCTGATTTTCATCGTCGTGGCCT  
GCTCCTTAACACCTGCAACCGA

>517

GTTGTTCTGCCTCAAAGGTGGCCTGGGCGGAGGGATCTTCGGGGTACCCATGTCACCA  
CTGTATTCCAGGGGCGACGTCGTAAACCAGGACGACCTGTACCAGGCCTTGCCAGT  
GGTAAGATTGCAGCTGCTGGACTG

>518

GAAAACAGCCCAGCTGAAGGCTGCTGAACCACCCTTCTTATCTCCCTCTCTCTCTCT  
CTCCTTTCCAGTGATTCTGCCCCACATTGGCAGTGCCACCCACAGAACCCGCAACACC  
ATGTCCTTGTTGGCAGCTAACAA

>519

TTGGAAGTGGGCGGGGGGTGAGTATGTGCTGGGTGGGGCTGGGCTCCCCAGTGACCT  
CCCCGCCCCCAGGCCGGCTGCATCCCAGTGCTTCTCAGCCCCCGCTGGGAGCTGCC

TTCTCCGAGGTCATCGACTGGACCA

>520

CCCTACTCAGGTCATTCTTCATGGGGTTCTGTTCCCTCCCACTCTAATAGCCTGTGTCTC  
ATTCCCCCAGGCTCCCGCCCTGAGGGCAGATTACAGCGCCCTGATCTGGGTGGGGCCCC  
CAGGCCAGCCCCCTCTGAAGCT

>521

GCCTCCATTTCCCTGGATGTTCTAGGCATTTAGGAGTCCAACCACACAGCTCACTTGAG  
TCCCTCCCCAGGTGGACTTTGCCTTTCTGGTGTGGCAGAGCTTCCAGAGCGGATGGT  
GGGCTTCTGACGTTCGAGCCATT

>522

AGGAGGGAGGAGAATGGGGCCTGGGGATGGATTTGGCTGCAGCCTCTCCCTGTCTTTT  
CCTCTTGCCAGGTATTACCACACTCTCTTACCCACTCCCTGCCAAGGCTCTGAGGA  
CCCTGGCAGATGAGGCACCCACC

>523

CTTGCTGCACGGGCGTGGGGAGTCGGAAGGGCAAAGAAGCCCGTTAATGCATTGCTTC  
TTTCCCTCTTAGGCGCCTGGGGGCCCGGGGCCAGGCCAAAGCCGCTGCCCCAGCCC  
CCGACTGCATCAACCAGATAGCGG

>524

GAGGAGCAGGGGTTTCTGTGACGTGACGCAGCCCCTGAGAACCTCTCTCCCTCCCTCT  
TCCTCCGTTCAGGATCCTGTTGACTGTGGTGGTATCTCCGGATCCTCATTGTGGCCA  
TTGTGGGGGAGACGGTGTACGAT

>525

GCGGTGGGCTCATGTTTGTGATTGAGTGAATGATTTAATTAACGCCTGACTCTGCTTTT  
TCTCCCTCAGAGTTTACCTTCCAGCAGCCCTACGACCAGGCCACCTGCTGGCAGCCA  
TCCCACCTCCGGAGATCCTCAA

>526

GGGAGGGATTCCCATCACTGCCAGCCGTTGTCCACGGCTCACTCGGCCTTTCTGGCG  
TTCTCTCCCCAGGCGAGAAGCCCTTCTCCTGTCCCCACTGCAGCCGTGCCTTCGCTGA  
CCGCTCCAACCTGCGGGCCACCT

>527

CAAAATAATATAGTACTATGATTTTCCCTTACTTTATAAGTAATTTTGTGCTGTTCTTTT  
TTATACAGCCATTGATTATTATTATCTAAAGAAAATGAAGATAATTACATATTTTGTGA  
TTTGGGCAGTAGCATGG

>528

GTGTGTGCACGCTCACACACATATTCACAAATAAGAACCTTTTCAATAGCCAGTATTTT  
CTACTTGGCAGGTTTCTCAAAGCAAACCACTGGAGAGACATGTCGAAAAATCCATGAA  
TTTGCATCTCCTAGCAAGATCAA

>529

TCCAAGATTGCAATTTGCTTTTCTTCAAGATCATTGACACTCATAATTGATTGAATTGTT  
TCTTTTTCAGGATGAGTTAAATGCCAGTGGAACCATCAAAGAAAGTGGTGTCTGGTG  
CATGAAGGTGATAGAGGAAGGC

>530

TTCTCAGATCAATGCAATTTTGCAGCAAATATCACTAGTTAATCATTCTTCTCCATC  
CTTCCATAGGGAATAGAAATCAAGGGTCCCAGCAGTGGCAACAGAAATATTACCAAAG  
AAGTTGGGAAAGGCAACGAAG

>531

AAGGGTTCATTCAGTGTAAAAAGGAAACGATTATAAATGTTAATGGGATGTTTATTTTT  
TCTCTATAGAAAGCTAGACTGGCCAGGATCCGGGCAGCCAAAAGCGGAAGCGCAA  
TGCTTACATGCAGAGCAAACGGA

>532

AATATGTAGCCGAGGTTGAGTTGTTTGCAAATAAAATAGAAAGCTCTTCTGTCTTCTC  
TTTGTTAACAGTCCTCAGAGGATGAGCAGGCTTTTGTAGCAAATCCGGCTCCAGCTTT  
GAAACCCAGCACCACCACCTGC

>533

ATAAAGCTATGTATTTTCGTTTTTAAAAATGTGCTTCTCTGTTTCTTCATTTACTTACA  
GTGGAACAGAATCACGAGTTTGTGGACGAACAAGTCTTTGAAGAAAGCTGCATGGAA  
GTTGCAACTGTTAATCGTCCTT

>534

TATTCTTCAGTTGTATGAAAAACATTTAAGTAAACAACCTACTTTCCTAAATATTTTTT  
TTCTATCAGCCGATCCAGTTTAAATGCCAAAATGGAAGAGTGTGTTAACTAAACTGTG  
AACAACCTTATGTGACTACA

>535

GGAGTGGGGAGGGCTATCAGGCCAGAGCTCAGCGGCCACTGCCCCAGCTCACGGCC  
GGCTCTGCTGCAGGACCCCTTGAGTGGCTCGGCTCCCCACCAAGGGGCTCCTGCCCC  
AGCCCCAGCTCCAGCCCCAAGGAGC

>536

AGAAGGGTAGGCGGGTCCAGGCCAGGATCAGGGGGTTGTGGGGGAAGGACTGACCC  
CACCTGCTGCAGAGCTGCAGGTGCCTTCCAGGAGTTTGACCGAGACCAGGACGG  
CTACATTGGCTGCCGGGAGCTGGGTGC

>537

AGAGGAGGGAGGGCCAGGGAGGGGCAGGGGTCTCTGATGCCCTGGGTCGTGTAATGG  
ACGGGACCCCCAGGTGGCGGAAAGGTGGACTTTGAAGACTTCGTGGAGCTGATGGGC  
CCCAAGCTGCTGGCAGAGACGGCAGA

>538

TGCCGTGAGTGAGGGGCTGCGCGTGTGAATGACTGTCAGTGACCAGACGCCACAACC  
AACGCCGCCACAGTTCGACACCAATGGGGACGGCCGCATCAGCGTGGGCGAGCTCCG  
GGCGGCCCTCAAGGCCCTGCTGGGGG

>539

GGGTGGGGGGTGATTGCTGGTCTTTGTTGTGGCTGTTAAATTTAAACTGCCATGCAC  
TCGGCTTCCAGTATGCTGGGAGCGGTGAAGATGGAAGGGCACGAGCCGTCCGACTGG  
AGCAGCTACTATGCAGAGCCCGAG

>540

GTGGGAGGTCTGGGCACCCTCCAGCCGGTGCTAACGCTGTGCCTCCCTCCCGGGG  
CTCTGTCCGAGGGCTACTCCTCCGTGAGCAACATGAACGCCGGCCTGGGGATGAACG  
GCATGAACACGTACATGAGCATGT

>541

CCAGAACATAGTGGGAGAGAACTGTAGGGATCTGCGGGGCCTAAAGCTAACATATTA  
CTCTGGGGACAGGAAGCAGCTTACCACCCAGAAGTGGCCCTGATGTGCGGCTTCGA  
GCCCTGCACTATGGCCGGGAGTGTG

>542

GCCCTATTTTCATAGATCAGGGTAGACCCTAAGATGTGATGCTCTTTGTCCCTGCCCGCT  
TCTTGCCAGACCCTGCAGAAGCCAAGCCAGAAGTGAAGCAGCAGTTGACAGGACA

TTCAAAGCGTGTGGCTGGTTCCG

>543

ACCATGCTCCCTGGTGCTTTTGACCTCCCCTCTGCCTTAGCCTCTTCCTCTTCCTTC  
ATCCCACCAGGAACAGAATGGGTAGACCCAGAGGACCCACAGTCATTGCTGAGAAT  
GAGCTCCTGGGAGCTGCAGCCGC

>544

CTCACCATGGCAGTGTCCCCACCTTCATCTCTGACTTTACATCTCTTTCTGCAACCTTCG  
CTTATTGCAGGAGGCAGATGAGTCCTTGAACCTTGAGGAGCAGATACTAGAAGCTGCC  
AAGTCCATTGCAGCAGCCACCA

>545

CTTGAGAAGGCTGGAGTGGGGATGGACCAGGGCAAGGGGCATATTTTAAGCAA  
CTCCCTGCTTTAGGCCGGATGGTGGCTGCGGCCACCAACAATCTGTGTGAGGCAGCC  
AATGCAGCTGTACAAGGCCATGCCA

>546

AGAATTGAGGTACTGTCTCAACTGGGACCGTACCTGAGTTCTCAACCTAGGCCACTTT  
CTCTCTGCCAGGCTGCTGGCAACGCAGTGAAGCGAGCCTCAGATAATCTGGTGAAAG  
CAGCACAGAAGGCTGCAGCCTTTG

>547

GCTGGTCCCAACTACCCTATGCCCTGCTGTGCATCCTCACTGAACCTAAGTCCCGATC  
TCCACCCTCAGATCATCGCAGCACAGGAAGAAATGCTTCGGAAGGAACGAGAGCTGG  
AAGAGGCGCGGAAGAACTGGCCC

>548

TTTTACACACTACCCACCCATCCCTGGCTTTCTATTTCATGGAACAACCTCTCTTACA  
ATCCCTCCAGATCTTCGAAATACTGTGGACAATGCCCGCATCGTTCTGCAGATTGACA  
ATGCCCGTCTTGCTGCTGATG

>549

GTAGGTGGCATGAGTTGAGAAGGTTCTGGATCAGAGATAGGGGCCCTCTGATCACCT  
CCTACTCTATAGGTATGAGACAGAGCTGGCCATGCGCCAGTCTGTGGAGAACGACATC  
CATGGGCTCCGCAAGGTCATTGAT

>550

ATCACAGAAGAAAGGCCTTGTGGAGCTCTGACCCTGAACCCTCTCACTTTTGCCCC  
TGTCACCTTTAGGAAGTAAAGGCCTACAAGCCAGATTGCCAGCTCTGGGTTGACCG  
TGGAGGTAGATGCCCCAAATCTC

>551

GGATGGCTGCCAAGGTGTGGGAGGGAGGCAGACGGAATGAGGGGCCTGATGGACTGT  
CCCCATCTGCAGATTGAGGAGAGCACCACAGTGGTCACCACACAGTCTGCTGAGGTT  
GGAGCTGCTGAGACGACGCTCACAG

>552

CCAAAAGTGAAGGGATGAGCAGTCCTGGGACTCTGGGCTCACCTGCCCTCCTCTCT  
GTGCCCTGCAGAAGGCCAGCTTGAGAACAGCCTGAGGGAGGTGGAGGCCCGCTAC  
GCCCTACAGATGGAGCAGCTCAACG

>553

CCTCTACCTTTCTGTCTCCCTTCTACTCCACGGGGCTGTTATAACTTGGGCTTGGTCT  
TCTGTTACAGTCTTGGTGATGCCTTGACAGCAGCAACTCCATGCAAACCATCCAAAA  
GACCACCACCCCGGATAGTG

>554



ACCACAGTTAATTTTCTGCAAATATTAACAGTTTTACTGATCTAAAATATTATTTTATC  
TTACAACAGGGAAATTGGTTACAGTAAATATTTACGACTAGATAGATACCACCATCGC  
TTTCCCAGGCTCTCACTC

>555

AAGAACTCAAGTTCAGCAGGGACAGGCCCCACACCCTGGCTGCTGGCTCATGTTCTCC  
TCCCACCCCAAGGCTGCACTTTATAGACCAGCACCGGGCTGCGCTTATCGCGAGGGT  
CACAAACGTTGAGTGGCTGCTGGA

>556

TCTACTCTTCTTTCTTGATGCATGGAGAATGCCAGCACTAATTTTTTTCTTCTCTCTTT  
TCCTTTTAGGCACACCATATGATCCCTATAAGGCACTGTGGTTTGAGCGGAAGAAGGAC  
CCTGTTACCAAGGAGTTAAC

>557

GTGCCCTCCTCCAGGCAGCCTCCTAAGCCCGCCACCTAGTGATGCCAGGCGCCCT  
GTGTCTGCCAGGGGGCCGGTCTGGAGGTGGGCTTGGCATGGCCATCGCAGCGTC  
AAAGGTGCAGGAGGCGCCATTGA

>558

GAGGGGTGGGCGCCAGGGTGCAAGTGACCCCATGGCCCTCAGAGGTGACCTGGTGC  
CATCCCCGACCAGGAGACGCAGGTGCCCGCTGCTGGAGGCCGGCTCCGGAGGGA  
GAACATCCGTACGGAGGTGATGGCGC

>559

TAATTTCAAGCTCATGAGTGGTTGTAACCTTAAACGTTCACTAGAGATGGCTTTCTGT  
CTTTGTTTCAGCCGCTGCCGTTTAAAGCGCCTGAATCTGTCCCAAAGGGGAAAGCC  
GATGACATGTCAGACGATCAGGG

>560

TGCTGTGAACCGAGCTTCTCCTGGGAGTTGGAGGGAGGGCCACCTGTCACTTGCCAC  
ACTGTCTTGTAGGATCAGGAGCGTCTGGGCAAGCAGCTCAAGTTACGTGCAGAAAGG  
GAAGAAAAGGAGAAGCTGAAAGAGG

>561

CTGTGTGCGTCCATGGTGCCTCTTTCTCCATTGCTCGAAGACCCCATCGGGTCTCTT  
CTTGATTTAGACCCTGGCCGGCTCCTGTGGGAAGTTGCCCTTTGAAATTAAGA  
GCACATGGTCTGGCCCTCGGC

>562

AGGTTCTGGGAGGTTTGTGAGCAGGTCTGTAAGGCAGCGTGATCCTGAGCCTGGGGT  
TTTCTTCTCAGTGATGTCGTCATCGTGGAGCGTGGGAAGGGCGACGGTGTCCCGAG  
AGGAGGAAGTTTGGCAGGATGAAG

>563

TACCTCCTCACTGTGCCCTTTCTCCAGCCCCAAAGACAGTTGTGAGTCCCATGTGTT  
TCTTTTCTCAGAAGCTCCTGGACTATGAGGTGGACAGTGATGAGGAGTGGGAAGAAG  
AGGAGCCTGGGGAGTCCCTGTCCC

>564

ACTTTGTTTTTAATAAGGCACACACTCTGCTTTTCTATCTGATGAACTTTTTTTTTTCT  
CCTTTTGAGGATGATGATGACGACATGGGAGAGGATGAAGATGAGGACGATGGTTTCT  
TTGTGCCCCATGGGTACCTGT

>565

TTCTCAAAGAGTGCCTGGGCATAGGGGAGCAAGAACCCCAAATAAACTTCTGCTTT  
CTAAACCACAAGGAGTGTGCCGACCCTGAGAACCATAAGGTCCGCCAGAACTGAAG

GCCAAGGAGTGGGACGAGTTCCTGG

>566

TTTTGTTTTTGGCCTGTGGTGATGGGTGGCTCCCCAAGCCTCATGCCACCCATGTTCCCTCCTGCCAGTCTGGCCAGCTGCTGCCGCTCCTGCACGGCAATGTGAACGGGAGCAAGGTCATCATCCGGGAGTTCCA

>567

CCCGTACCGCACTGGCACCAGGGTGGCTGCTGCCTGCAGTGCTGATGGCCGTGTACCCTGTCTGTCCAGATTGGTGCTGAAGACATGGACGGCTTCCAGGCAGACACGGAGGAGGAGGAAGAGGAGGAGGGCGACTGTA

>568

GGGTGGGGTCTTCCCCAGGGAGCCCAGAGGGCCAGCCAGCTCAAGACCCTCCCTCTCTTGCCCTGCAGAGGTCCAAGCCCCGTGTGGAGCCGCTTCCGGAGCTGGGGGTGGTGTGGGGGTGGACACCGCAAGGCCAC

>569

GCCTATAAACAAACAGGATAGAAGATACTGCTCGACAGTGCCATCCCTATCATGGCCTTGTTTTTACAGGCCCAACGAAGGAACCACTTCTGGGAACCTATTGAGGAAAGAGAGACAGCAACCCCTTTGACAACGATG

>570

CCTGCTGGGCCTTTACTGGTGGCTTTCCTTTCTGAGCACTCATGAGGCCCTGTGTCTTCCCTCATATAGATTCCAGGTGGATCTGCAGAATGGCAGCAGTGTAACCTCGAGCCGATGTGGCCTTTCATTTCAATCCT

>571

GGATAATAAGTTAATTTATTAAGTGTTTTTTTTTGGTGGCGGGGGGCTCTGTCTTCTGTATCTCTAGGTGGCTGTAAATGGAAAACATACTCTGCTCTATGGCCACAGGATCGGCCCAGAGAAAATAGACACTCTGG

>572

TTTGGACACGAGTTTTCCCTGGAGATCGCTTCTGCAGGCCTCTTGGTCCTGACTGTGGCTTCTTTTTCAGAGCCTGCCATTCGCTGCAAGGTTGAACACCCCATGGGCCCTGGACGAACTGTCGTCGTTAAAGGAGAAG

>573

CATTGCTGAAATTGCCACTACTCTGTCCACTTGGTTAATTAAGGTTTTTTTTCTTTCTTCTCAAAGCTTTAATGTTGACCTACTAGCAGGAAAATCAAAGGATATTGCTCTACACTTGAACCCACGCCTGAATATT

>574

GTTAGCATGTAACAAACACAAAATTTAAACTAAGGGGAACCACTAATGGCATGTTTCCTTTCTTTTTCAGATGATAATTTACTGTGATGTTAGAGAATTCAAGGTTGCAGTAAATGGCGTACACAGCCTGGAGTACAAAC

>575

AGGCTTCATGGAGGAAGTGCAGTGGGTTTCTGGGATCCCCACCAGGCACCCCTTCTCCTTCGACTTAGGGTGTGGCCGGCCGAGGTTTCGGATGCAGGCGCCGGATCGTGGGGGTCACGCTGCCCCGGCCGGCGC

>576

CTGGGCGGGGCCGACACTGACCTCCAGCCTCCGCAGCTGGCCCCTCTACCCAGCCA CCTTCCCTCCAGGTCCCTGAACTCATCCGACTACCAGGTGCACCTGGGGGAACTGGAGATCACTTTGTCTCCCCACTTCTCC

>577

CAAGGTCTGCCATGCCCCAGTGCACGGCCTGGTGCCCCAACCTTCTCTGAAGCCTGT  
TCCCCAACAGAGCCTCTGCCACCTCCGTACAGCCTGCGGGAGGTGAAAGTCTCCGT  
GGTGGACACAGAGACCTGCCGCCG

>578

GGGGCGGCTGAAGCCCAGGGAGGGGCTCCCCATCTTCTCGGCTCCAATGCTCGCCTT  
CTCTGTCCTCAGGACGACTCCGGGGGCTCTGGTCTGCCAGGTGAACGGTGCCTGG  
GTGCAGGCTGGCATTGTGAGCTGGG

>579

TCCGAACATCTATACTATTTGATCTCTCTAACCTGTGTTTTGTGATATTTATCATTGTG  
TACTCCAGGTTGAATTCACATTCCCTGACTTTGTAACAGAGGGAGCCAGGGACCTCATT  
TCAAGACTGTTGAAGCATA

>580

GGAAATTAGTTTGCTCTGTATGGGTCAAATATAGGCATATTCTCATGATTGTCATGTTTCT  
TTCTCCAGCATTATCAGCTGCCGCTTATTCAATGCCTTGATTTTCTCAAAGACAAC  
TATAATCATTCAAAAATTC

>581

CTCTTGAGAAATCCTGTGTCTCAGAAACCTTCGGAGACATTTAAGCCCTCTCACCTCT  
CTTTAAACCAGGACTCTGCATGCTGCTGAAAGCAAATGAATGTGGAGGGTTTCAAACA  
AGACAAAAGGCATTCCCTCCCTGC

>582

CCCAGTTCTGTGCTCCTGACTGGGTGGGGTGGAGGGGCTGCTCCACATCTCACAGCGTT  
CTCTGGCTGCAGAATCTCCAGCCAAGTCTCCGTGCTCGTGGTGGGAATCGTCATCGG  
TGCTTGCTACTCACGGCAGCGGC

>583

TGGGGGACGCCAGTCAGACCCAGAGCGCCTCAGAGATTCTGATGACCTCTCCCTCTCT  
CTCTCTCCTCAGCCCCTTGATCTCCCTTCGTGGAGACGACACCGGGTCTCCTGCCC  
ACCCAGGGGAGGCCAGGATGC

>584

TGGGTGGAAAAGGGCTCCAGGGTCATTATCATGCTTTTGGTTTTCTGACATGCTCCATT  
CTCTGTTGCAGCCTTGAGTCTCAAACCCCAACACCAAGCAAGCATCATTCTGGAGA  
CCGTCCCCTTCAAGAGTGGACAA

>585

CAATGACTCATCAACCCCTATATCTATAAAGTCACAATCGCTGTGACTTGATTTCTGTTT  
CACTTTGTAGATATGGAACCCATTACATGGACTTTTTAAGAAGCTTGAATTCCAGGG  
CCCACACCTCTGCCTTTTTTG

>586

CTTCTGGGTTGGGCTCCAGCTGTAGAATAAGGCTGTTGATGTTAATCAACTCTGTTT  
TTTTACACAGCTTTTATGATGGTCAACAGCCTGTGCTGGCTATCACAGATCCTGACAT  
GATCAAAAACAGTGCTAGTGAAA

>587

ACACATTTTCTACAACCATGGAGACCTCCACAACCTGATGTAGGACAAAATGTTTCTGCT  
TTGAACTCTAGCCTTTTGGTCCAGTGGGATTTATGAAAAGTGCCATCTCTATAGCTGAG  
GATGAAGAATGGAAGAGATTAC

>588

GGAAAGCCATGTCCTTCTGGGACTAGAGTCTGCACATTTAACTATGGGTGGTGTGTGT  
TTTGTGCTTAGATGGTCCCTATCATTGCCAGTATGGAGATGTGTTGGTGAGAAATCTG

AGGCGGGAAGCAGAGACAGGCA

>589

CTGTTGCATGCATAGAGGAAGGATGGTAAAAAGGTGCTGATTTAATTTCCACATCTT  
TCTCCACTCAGCGTCTTTGGGGCCTACAGCATGGATGTGATCACTAGCACATCATTTGG  
AGTGAACATCGACTCTCTCAAC

>590

ATTGCTCCAGGTAAATTTGCACATTCACAATGAATTTCTTTTTCTGTTTTGTTTTGTTT  
TTCTACAGCAGTCTTTCCATTCTCATCCCAATTCTTGAAGTATTAATATCTGTGTGTT  
TCCAAGAGAAGTTACAAA

>591

TTCTCTTCATCTAAACTGTGATGCCCTACATTGATCTGATTTACCTAAAATGTCTTTCCTC  
TCCTTTCAGCTCTGTCCGATCTGGAGCTCGTGGCCCAATCAATTATCTTTATTTTGCTG  
GCTATGAAACCACGAGCAG

>592

GTA CTGCATGGACTGAGTTAAAAGTTAATTCAAAATCTCAATTTATCCAAATCTGTTTCG  
TTCTTTCAGGCACCACCCACTATGATACTGTGCTACAGATGGAGTATCTTGACATGG  
TGGTGAATGAAACGCTCAGAT

>593

AAACCCTAACATGTA ACTCTTAGGGGTATTATGTCATTA ACTTTTTAAAATCTACCAAC  
GTGGAACCAGATT CAGCAAGAAGAACAAGGACAACATAGATCCTTACATATACACACC  
CTTTGGAAGTGGACCCAGAAAC

>594

TCACTTTGATGCTATACTTTCTACTTTTGT TTTAATGCTTCTCAATATGCTTGTTTAA C  
TGTTGCAGATCCCCCTGAAATTAAGCTTAGGAGGACTTCTTCAACCAGAAAAACCCGT  
TGTTCTAAAGTTGAGTCAA

>595

TTAGACCAGGCTCTCCCTGGGCCAGGCTCCGGTGGGACTGGCAGGCTGACGCATGT  
ATCTTCTCTCAGGGTGTCTTGCCATGGTCCCCTGGTGCTGCAACTCCTCTCCTCAGC  
CTCTTGGCTGGGCTCCTTGTTCA

>596

GGGGCTCAGTTCAAGGCTTGGCACACAGTAGGTGTCTAATAATTGCAGTTCCTTTTTTA  
TTTTGGCCAGTGTCCAAGGTCCCAGCTCCATAAGTCAGGAACAATCCAGGCAAGAC  
GCGATCTACCAGAACCTGACCCA

>597

GAAGGCTGGGCAGGTACAGGAATATGGACAACCTAATCTAAGCCCAGCCCTGACCAGC  
CTCCCCAACAGAACGCCTGTGCCACCCCTGTCCCTGGGAATGGACATTCTCCAAGG  
AAACTGTTACTTCATGTCTAACTC

>598

AAGAGATGGGGAGACAGAGCCTGGAAAATGGGAAGCAGAGCTCCCTCCTGACTCCTC  
CTGTACCCTCCAGA ACTTCTACAGCTGCAGTCTTCCAGAAGTAACCGCTTCACCTGGA  
TGGGACTTTCAGATCTAAATCAGG

>599

GACAGAAGGTAGAAACACAGCTCATGTAGCTGGCGGGGACAGAGGCTCACATTCCGC  
ATGGGCTTTGCAGCTTCAAGCAGTATTGGAACAGAGGAGAGCCCAACAACGTTGGGG  
AGGAAGACTGCGCGGAATTTAGTGGC

>600

TGGGGCTCAGTTCAGGGCTTGGCACACAGTAGGTGTTTAATAATTGCAGTTCCTTTTCT  
TCTTGGCCCAGTGCCAAGGTCCCCAGCTCCCTAAGTCAGGAACAATCCGAGCAAGAC  
GCAATCTACCAGAACCTGACCCA

>601

GAAGGCTGGGCAGATATGGGAATATGGACAACCTAATCTGAGCCCAGCCCTGACCACC  
CTCCCCAACAGAACGCCTGTGCCGCCACTGTCCAAGGACTGGACATTCTTCCAAGG  
AAACTGTTACTTCATGTCTAACTC

>602

CAGAGACGGGGAGGTGGAACCTGGAAAATGGGAAGCAGAGCTCCCTCCTGACTCCTC  
CTGTACCCTCCAGAACTTCTACAGCTGCAGACTTCCAGGAGTAACCGCTTCTCCTGGA  
TGGGACTTTCAGACCTAAATCAGG

>603

TTACAGAAGGTAGGAGTGTGGCTCATCTACTGGGCAGGGCAGAGGCTCACATTCTGCA  
TGGGCTTTGCAGCTTCCAGCGGTACTGGAACAGTGGAGAACCCAACAATAGCGGGAA  
TGAAGACTGTGCGGAATTTAGTGGC

>604

TCATGTGTAGCTGCCCTGTCCCCTGGGGCTTTATCTCATCCATGCAAACCTACCATCTGCT  
CAACTTCCAGCTACACCCCGTGCACCCTTTGACTGGGGACTTGCTGGTTGAAGGAGC  
TCATCTTGCAGGCTGGAAGCAC

>605

CCCAACTTCAAATTTTTCATATAATATAGGAAAAATAATGATTGAAACATTTAAATGTTC  
TTCTTTACAGATGTTTCATTGGATCCTTCTTTGACTCATACAATATTTAATCCAGAAGTA  
TTCAACCACAGATGGCAC

>606

TGTACCTTTGTTGCCGTAATTTTAAATAAGTATTTCTCAAACCTAATTGGCTTAACGTTCA  
CCTTTGCAGAGAGGATTTTCGTTTCCGTTATGTATGTGAAGGCCCATCCCATGGTGGACT  
ACCTGGTGCCTCTAGTAAA

>607

TATCATAAACATGTTTCCATGTTGCTGGAGAGTCAGATATGCTAACTTTTGGAAATGTGCT  
TCTTATATAGATCTGCAACTATGTGGGACCAGCAAAGGTTATTGTTTCAGTTGGTCACAA  
ATGGAAAAAATATCCACCTGC

>608

CAGATTCCTAGACATTAAGTGCCTAACTTTTGGTTGTTGTTGCTGCTGCTGTTACTGTT  
TTTTCTCCAGCTTCGCAAACCTGGGTATACTTCATGTGACAAAGAAAAAAGTATTTGAA  
AACTGGAAGCACGAATGACA

>609

TTATAAAAGCATGGTCTTTTAAATGTTCACTTCCCTGGGCATGAATGGACTGTGCTGT  
ATGGCCCTAGATCGGGAAAAAGAGCTAATCCGCCAAGCAGCTCTGCAGCAGACCAAG  
GAGATGGACCTCAGCGTGGTGCG

>610

CCTACCTAAAGGACTGGCTTGTGAGCTGAGGATTAATCATGTTATTTGTTGTTTTTCCC  
CTGTGAACAGAAGCCCCAATGCATCCAACCTGAAAATTGTAAGAATGGACAGGACAG  
CTGGATGTGTGACTGGAGGGGA

>611

ATTTTTCAGCATGTTTATAAATACTATTTACACTATGTGAAATTACACACTTCAATGTGAT  
TGTTTGCAGATGACATCCAGATTCGATTTTATGAAGAGGAAGAAAATGGTGGAGTCTG

GGAAGGATTTGGAGATTTTTC

>612

TGAGTAGCATTACTGCAAAAAAAAAAAAAATGTAGTCCTACACCAACATGTGGTTCTT  
CGTATCCTGCAGTTTGCCATTGTCTTCAAACCTCCAAAGTATAAAGATATTAATATTACA  
AAACCAGCCTCTGTGTTTGTC

>613

GGTCTTTCTGTGGCTAGTGGTGGGACCAAATCAATCTTTTCTCCTCTGGTTTCTTTCTTCT  
TTAAATACAGATAAAGAAGAAGTGCAGAGGAAACGTCAGAAGCTCATGCCCAATTTT  
CGGATAGTTTCGGCGGTGGTAG

>614

GACACTAAGTTGTGCTGAGTCTTTGTAAAATATCTTCATGATGTTTCATTTGTTTTACTT  
GCCGTTTCAGGGTATAGCTTCCCACACTATGGATTTCTACTTATGGTGGGATTACTTTC  
CATCCTGGAACACTAAATC

>615

CATTGGAATAGCGAATTATCACTAAATACATTTTACTGAGAAAAATCTGATGTTTTTGCA  
TTTATCTTAGGAACCATGGACACTGAATCTAAAAGGACCCTGAAGGTTGTGACAAAA  
GTGATGACAAAAACACTGTAAA

>616

CCTAAGCATGCCATACCATAAAACAAAAGTAGGAACACTCAACTATGATTGTGGTCA  
TTGCCTTACAGATAACCTCTTTCTAGAGAAGGCTATGCAGCTTGCAAAGAGGCATGCCA  
ATGCCCTTTTCGACTACGCGGT

>617

TCACATCTTGGGAATCTTTCTTTTTCATTAACATTTTAGTTAATTATTGCCACTGTGTTT  
TCATTCCAGTGTCTTACACTTAGCAATCATCCACCTTCATTCTCAACTGTGAGGGATCT  
ACTAGAAGTCACATCTGGT

>618

CTACCAAGCTGTGAGTTGTAAGTAAGTATTCCTGCTGACCAGTGAATCTCCTGCCCTT  
TCACTTTCCAGACGCCCTTGCACTTGGCAGTGATCACTAAGCAGGAAGATGTGGTGGG  
GGATTGCTGAGGGCTGGGGCCG

>619

TCAGCTTACAAGGGCCATCTTGTGAGTTAGCCATCCCATCCTGTGACTGTCCCTTGC  
TTGACTCTAGGTCTGAATGCCATTCTAGCCATGATGAGCAATAGCCTGCCATGTTT  
GCTGCTGCTGGTGGCCGCTGG

>620

CACTGGGAGGTGGGGACAAAAGGGCAAAGAACCTTCCACTAACGCTTCTTGTGTG  
GGCTGGATTGTAGGGTATGCCATGTGGACAGTACTACCTACGATGGAACACACCC  
CTGCATATAGCAGCTGGGAGAGGGT

>621

TGACCTTTGCAGGCAGTTGGAAGTTGACAAGATCTGGGTTTACCTAATGCTGTGTAATC  
TAACTTCGCAGGAGCAGATCCCCTGGTGGAGAAGTTTGGCCTCTCTATGACCTGGAT  
GACTCTTGGGAAAATGCAGGAGA

>622

GCAATGATCAGTCCCTCCAGAGTGTCTATGGCATGTTAGAACAAGTGTGTTCCCTTCTC  
ATTTCTTCAGGAGACATGAAACAGCTGGCTGAAGATGTGAAGCTGCAGCTGTATAAG  
TTACTAGAAATTCCTGATCCAGA

>623

TGTCAGTGCTTACAGCCTGCACTGGGACTCGAACACAAGAACATGCTCCTCCTCCTT  
TCTTTCTCACAGGTCTCTGGGGGTACAGTCAGAGAGCTGGTGGAGGCCCTGAGACAAA  
TGGGCTACACCGAAGCAATTGAAG

>624

CCACAGAATAGTCCATGAGCTTTTTAGAGCCCGGCCATTCCCCAGTGAATTTGTGCTT  
TCTCCCCTCAGACGAGCTCCGAGACAGTGACAGTGTCTGCGACAGCGGCGTGGAGAC  
ATCCTTCCGCAAACCTCAGCTTTAC

>625

GAGAGTCTAGAGCATATTTGGTCATAATTAGAAGTACTGACATTCTTCATCCTGTATTCTTT  
CTTTTCTCAGGCCCTGAAAAGACAGATGAATATCTCTTAGCAAGGTTCAAAGGCGATG  
GTGTAATAATAAGGCCAAGCT

>626

ATTTAATATTAACCATTGTAGGATGTTTTAAAAATTCAACTTCTCTGTTTTTCCAC  
CCTCATCAGGGAATGGCGGCACGTGGTTCGGTCTCAGGGACAACACAAACAAAGGATC  
TGGGTCAACATTTCCCTTCTG

>627

GCGTCGGTGTGCTAGCCTGCAGATAGATTCTAGTTTTCTTAATAGATTACTCGTTATGTT  
CTTTTGTGAGGTAATAGAGCATGAACATCCAGTAAATAAGATTCTTTCATTGCCCGTGA  
TGTGACAGACAACCGGGCAT

>628

ATTGATAGCAGACAAAGGAAATAAAATACTAAAATTAATAACTGATAACAGTGCTTTC  
CCTTACTGCAGGCTGAACCATTAGTTGTTGATCTTAAAGACCTTTTTCAAGTTATCTATA  
ATGTAAAGAAAAAGGAAGAAG

>629

ATGTAATTTCTCATTGAAGTCACAACATGGACTAACACTTTCTTTTTTTTCTTTCCA  
AATGTGATAGGAAAGCAAAGATATCCTGTTAGTGGATCTAAACTCTGAAATCGACACCA  
ATCAGAATTCTTTAAGAGAAA

>630

AGACAAAATGAGGCTGTATTTCACTGTTAGTGAGTAACTAAGGCTTCTCCCTCCCTCCC  
TGTCTGTGAGTCTTCAGCCAATGACTTGCTTGCATCAGACATCTTGTCTCTCCCGTC  
TCAGAACCTTCAGGCCAGGCGT

>631

TGCTCTCTGAAATTCAAGAATCTTCTTCAAGCTTGATTCCTGATAAGTATTTTTCTTCTCT  
CTTACTTCAGGTGGTGAACGTGCACACTCCCTCAGGCAGGACCATGGAACACAGCAT  
CTTTGGTCTTCAATCAGTCCCC

>632

GCTGACTCGGGGACTGGCCTATATTTGGGGAAAGCTTGTCTACTGATTGCCTGGATTTT  
TTACCTTCTAGAACCACCAAAGCCAGCTCCAGACAAGTTTCCCTGCCAGTTACCAAA  
TCTACTGACAATGCATTTGAGAA

>633

AAGTCTTCATTGCGATTTTTTTCTTATGACTGTAAGTATTTATTGACTAGATGATTTTA  
TCTTCTTAGGTGGCTTCTTCAACCTGTATCTTCTGAGATGTATAGGGATCCATTTGGA  
AATCCTTTTGCCTAAATTC

>634

ATATTTAATACATTGATATTCAGTTCAAAAATTCTAACCACAAGTTTCTTCTTCTCCATA  
CCTCTCTAGGAACTTGGTCTGCAGACCATCCAGAGGAATAAAAAGTTGGCCTTAGTA

GTCAAAAACAAAGCTGATAGC

>635

AGAAAATGGTGCCTGAGAGGCTACAGCAGGACCCGGCAGTGACCCGCTGCTCTTGGC  
TGCTCCCTGCAGGCTCCACAGACTCTCCTGGGGCCAGAGGAGCTGGTGTGACCTA  
GCTAGGGATGCAAGAGTGAGCAAGC

>636

TTTCTTAAAACAAATTTTTCTCCATTGTGCATGGTTCTGTATATTAACACAAAATTTTCTT  
TTCTCATAGGAGAGATTATTTCAATCAATTTTTTATGAATTATTTACCATTGTACTTCA  
ATAGTAGCAGAAGACAA

>637

GCCCTCATCATCATGTTGATCATTACTATCACTGTGTTTCTGAAATGCTACTGAAACATG  
TCTTTTATAGGTGGAACATAAATAATGATACCTGGGTCATACTGAGCAACTAAAACCTT  
TAACAGTGAATTTGGATTTC

>638

TCTTCCGGGTCCTGACTGGTTACATAGTGTACCTCTCCGGTTCTGACATTGTGTTCA  
TCTCTCCAGGTATTCTAGAATGGATTCTGGGAAAGAAAGATGCCATGTGGATAGGGTT  
CCTCACTAGAACAGTTCTGGA

>639

AAAAATAAATGAAGTTATTTACTAAAATTAATAAAAAAGTTTCATTTTTCTTTTAAATGT  
TTCTATATAGTTATGAAGAAGCCAAGAATTTATTGACCAAGACCAAGATATTGGCCCCA  
GCCTACTTTATCCTGGGAGGC

>640

AAATGCTAATATATATCAGAACATCTCTGAATTGAAAACGTCCTTAAAGTAAAAATAACT  
TTTCTTTTACAGCTGACCGTATACACAACCTTGATAGATGTTACCAAAGGTCAATTCGAAA  
CTTACCTGCGGGACTGCCCTG

>641

CAATACATTGTTTCTTTCTAATATATATTTTATTTAATCAGACATCTATTTACCTCTCCTTG  
AATTGCAGACTCACAGATGAATGCTTCTCACCCGGAAACAAACTTGCCAGTTGGGTAT  
CCTCCTCAGTATCCACCGAC

>642

ATAACCCTAAAAGGTTGACAATTCCATTTTTGGTGCAGTTACAAATCATTTCACTTGTT  
TGATTTTACAGGACCTCCAGGATATAGTGGCTACCCTGGGCCCCAGGTCAGTACCCACC  
CCCACCAGCCGGCCATTCAGG

>643

TTATAATATCTGGATAAATTCAATATTTTTAACATAGAGGTGATTATGATTTTCTCTTTTAT  
GTTTTTAGTTTTAACAGTTTTTGAAACTAATAACAAATATGAAATTAAGAACAGCTTTG  
GACAGAGGGTTTACTTTGC

>644

GTCATTGAACCTTTCATCGAACCTAGGCATTATGATTATTACATTTACATATATATTTTGC  
CTTTGTAGATAGAAATCCAAGCTCCTCCTGGTGTACCAATAGGTTATGTTATTCAGACTT  
GGCACCCATGTCTACCAA

>645

ACTTCAAATTTGAAAGTACTTTTGCTATAAGTTTCTAAAAGTATTTAATACTTTTTTTTT  
TCAATTTAGATTAATCTCTTGATGAACAGTGTGTGGTTGGCAAATTTCCAAGCACTG  
GACTGGAATTTTGAGAGAGG

>646



TTTCTGCATCTGATAATTGATCTCTGTTTTGTTGTTGAAAATTCATTTGTATACTTTTGT  
TTTATCTAGGACTTCATGTTTTTTGAAAGCACTGGCAGCCAGGAACAAAATCAGGAG  
TGTGGTAGTGGATTAGTGAAA

>647

GTTAGGAGGCCAGAACTGGAGAGCTAAGGCATACTTCATCAGCTTAGCACATGACGA  
CTGTCTCTCCAGACTGCGTGGAGTGCATGGCGTGTTCAGACAACACAGTTCGTGCTGG  
CCTGACACCCAAGTTCATTGATGT

>648

TCCTGGGCCCATGAGCTGATGAGAGCCAGAGTCTGAGCTGCACTGCCTTATCATTCTT  
CCTTGCCCCAGGTCCCTGGCTCTGTCACTGAATAACAAGGTCTTGGCACTGGACTCTGC  
CAGCATCCTCCTGATGGTACAGG

>649

TAGAGGCAGTCACTTATTTGAATCCCATTGTCGTAACCTTCTACTATTTTATTTTCCACT  
GTGACTCAGGGAGATTCAGGTGGTCCCTTAGTTTGAAACACAACGGAATGTGGCGTT  
TGGTGGGCATCACAAGCTGGG

>650

GCTGTCATGGGGAGGAGTTGTGGCCATGTCCAAGGCACCTGTCCCATGCCCCCTGCCT  
CCTCTCACACAGGATGGTGTGAGGATGGAGGAGATTGTGGAGGGCTGCACCGGAGCA  
CTGCACATCCTCGCCCGGGACCCCA

>651

TGGGGTGTGTTGTCCGGCCTGCCTCACCCCTTCCAACCTCTCCCTGCTTCCCACGTCC  
CCTCTCCCCAGCTCCTGTACTCGTGGTGGAGAACATCCAGCGCGTGGCTGCCGGGGT  
GCTGTGTGAGCTGGCCCAGGACA

>652

GTCCCACTCCCCAGCCACGATGGAGGCTGGCCGACGTTAACCTGGCTTTTCTTTCC  
TCTCTGCTCAGCCACCTACGCTGCTGCCGTCTGTCCGCATCTCCGAGGACAAGAAC  
CCAGACTACCGAAGCGCGTGTC

>653

AGGCTGTGCAGACTGCTCCCTGCAGGGTAGCTTGCAGACCCTAGGACCGAGCCCCACT  
TTTTGTCCCCAGACATGGATGCCACCTACCGCCCCATGTACTCCAGCGATGTGCCCTT  
GACCCGCTGGAGATGCACATGGA

>654

CCTTTTCCCCGCCCCCTTCCCTCGCCCCACTCCCATTCCCCTTCTCACCACCCCTCC  
TTATTTCCAGACTGCGGCCAACTCCTGGGGCCAGCCTGGGGCGAGAGGGGCCACTTC  
CGCATCGTGC GCGCGTCAATG

>655

TAAGCTACTATGCAAGTAGATTTTCTCTTCAGCGTCACAACATGACTCATTTTCCCTCT  
ACCGTCACAGGTTAATTCTAAAGTTGCCTCTCTGGGGACAGCCATCTGACCAGAACT  
GCTATGATGATTCTGTTTATTG

>656

TTCAATACTAATTTCTGACAAGAACAGTGAGAATAAACTATTAAGTGCCTCAAACCTG  
TTTTTTAAAGGTCCCTAAGACGAGATAACTTGACAATCAGTTCCATGGACATGGTGAC  
CACAGCCAGCTGGAACCTGAAG

>657

TGAGGCACAGTTCTCCATGGCTATGAGACTCCATTTATGCATCAGGAGTAAAGGGGTCT  
TGTGTTTTTAGGTGAGGTTCTGGAGCAGCAGAACCAGGTA CTGCAAACAAAATGGG

AGCTGCTGCAGCAGGTAGATACCT

>658

CCCCTCACAGGTAATGAGAGGGACCTGCCCTGGAGAGAACGTGCCTTCATGATGTCCC  
TTGTTCTCTAGGATGTGGATGGTGCTTATATGACCAAGGTGGACCTTCAGGCCAAACT  
TGACAACTTGCAGCAGGAAATTG

>659

ACTGCTTTCTCTGTCTAAGTTGTTTTTGTTTTAGTGCTGTAAGAGTCACTAACCTATTA  
TGTCTTGCAGGAGTTGTCTCAGATGCAGACTCAAATCAGTGAAACTAATGTCATCCTCT  
CTATGGACAACAACCGCAGTC

>660

GGAGACCAATTGGGATGAGGAGGCCTAGTGGGGAATGCATATTATGAGAGGGTGTTCAT  
ATTCTTTTTCAGATCTCCAATTGCAGCAGTCCATCAGTGATGCAGAGCAGCGTGGCG  
AGAATGCCCTCAAGGATGCCAAGA

>661

TGAGACACCAGGAGAGCTGCTGCTTTGGGGGATGGACAGGGGCAGCAGGAATGCCTT  
TGTGTTTTTCGAGTGAACCTCCTTGGCCTGGGCGAAGCTGTGTGGACCAAGCAAGTCA  
GGAGTGTGGCCATGTTTTCTGAGCA

>662

CAGGGCCTCCATGGCCTCTGTGCGGGCGGGGGGCTACTTCATCTCTGAGTCTGTACCC  
CTCGTGTCCCAGGCAGTGGAGTGGGAGTGAAGAAGCTGTGTGAACTGCAGCCTGAGG  
AGAAGTGTGTGTGGTGGGCACTCT

>663

CCAGCTACTAACACCAGAGCTTTGGTGGGCTCTGGCCCCAAGATTATACCTCCTGTCT  
CTGCATTCCAGCACAACCTGCTCCCCAGCCTCCTCGGAGTAAATACATACCCAGAT  
GACGAGCTGGTCTTGAAGATG

>664

CGTTGGGGTGACTGGAAGGAGTGGTAGCACCTGGGGCTCCCTGCTCAGGCCTGATGCC  
ACTGCTCCCCAGGGACTGTCTGGCTGTGTTGGCTCCGTGAGAGACGACGGGAAGTT  
TCTGGTGGAGGACTATTGCTTTGC

>665

TCTTTGAGTTGCACCTAGGAGGGGCTGCCTCCCTTCTCGGCACCCTGGAGGACCCAC  
CTTCTCCCGCAGGTTTGTGCTACTGGTGTCCGGCCTGGGCTGGGTGGCGGTGGAGGC  
GAGAGCCTGCTGGGCACCCAGCTG

>666

GGTGGGGCTCTACTCTCCTCTGAGCCTGGGACTCGCCTGGGCCTGATGGCCTTCTGGG  
CTTCTATTCCAGGCCAAATACCTACCAAGAAAACCCAGGCAGCCAGCGTGGAGGCTG  
TTAAGATGCTGGATGAGATCCTCC

>667

GGAGTGGCCGGAGTTGGTGTAGGGGGCTCCTTCGGGGCCCTGTGAGCTCTCCCTGCC  
TGTGCCTTCCAGGCCTCAGTGCCCGTGGACGTGATGCCAGGCGAGTTTGATCCCACCA  
ATTACACGCTCCCCAGCAGCCCC

>668

CAGATGAGCTCTGGGCTGACCACTATGGGTGGCACCCAAAGCCAAGAGTCAGCTGAG  
CTTTGCCCTTGCAGATTTTTGGGGACATCAGGACAGAACGTGAGTGACATTTTCCGATAC  
AGCAGCATGGAGGATCACTTGGAG

>669

AGCCCCACATCCTGTGCAGAGTGCTAGTGCTGAGGCGGAACCCTCCTCAGAGCTGCCC  
CTTCTCCTCCAGGTTGTTACCCCTTCTACAAAAGTACCCGTTTCATCTTCCCAGAGTGC  
CCGCATGTCTACTTTTGTGGCAA

>670

TTCTGGCAGCTTCTCTTTGAGGCAGGACTTACTTGGAACTACAGTGGGTCTATGTGA  
CTTCTTTGCAGGTCTGAGGACCAGACAGTGTCTGTTGGTACTGTCCCTGACTTCAGT  
GCCACGCAGACCGCCTGCCTTGT

>671

TTCTTAAGTTCTTGACCTGCTGGTGATTTCCATAATGGTTTCTGTTTCATTTTCTCTGTG  
TCTTTTCAGCCTAGTGGAGGCCAGTATAAGATTTCAGATCTTTGAGAAAGGGGATTTAG  
TGGTCAGATGTATGAAACCA

>672

CTAGGCAAACAGTAATTTTGGTTAAAACCAAATACGTGTTCTGAATTACTGTTCTGTG  
TTTATTTTCAGGCTTCTGGAGTTACAGTGAATGATGAAGTCATCAAAGTTTTTAATGATA  
TGAAAGTAAGGAAATCTTCTA

>673

CACAGACCCCCACTAGCCGGGGACGCAGCTCAGGCCCCCTACCCCAACACAAACAC  
TTCTCTCCTGTAGAGGATAAAGCTTGGGGTTCATCCTCCTCCCTGGATCACTCCACAG  
TCCTCAGGCTTCCCAATCCAGGG

>674

AGTTTTTCAGGAATCAAACCTTTGCCCATCCACCTCCAGCTCAATGACCATTGCC  
CTTCTCAAAGGGACGATCATGGCTTCTCCCCCTTGCACTGGGCCTGCCGAGAGGGCC  
GCTCTGCTGTGGTTGAGATGTTG

>675

TGACACCAGTATCTCATTTGAACTGACTGTACTTTCTGCCTCTTCTTTTGTCTGGCCA  
TGGGGTCCAGCTATTGCAGTACAAGGCAGACATCAATGCAGTGAATGAACACGGGAAT  
GTGCCCTGCACTATGCCTGTT

>676

ATTCATGGTTGGTTCAGTACTGCCAGCGAGGTAGCAGTGGCTCTCATATAATGGCCT  
TTTCATTCCAGGACCTGGTGGCAAATGGGGCCCTTGTGAGCATCTGTAACAAGTATGGA  
GAGATGCCTGTGGACAAAGCCA

>677

TGTGTCTCTCGTCCCTTCCCACCTGTCTTCTCCCTCTGTACCACAGCTTAGGTTGTTTT  
TCTTCCCTAGAGCGGGCAGAGAAGATGGGCCAGAATCTCAACCGTATTCCATACAAGG  
ACACATTCTGGAAGGGGACCAC

>678

AGGAAATAATCCTGGCCTCTTGGGGCTGGGTTAGGGTGAAGCTGGGTACCTGACCTGC  
CCACTCTTAGGAAATGGAACCCTGAACAAACTCTGGCATTGACTTCAAACAGCT  
TAACTTCTGACGAAGCTCAACGA

>679

TTTCTCCAGTTAGTGGGCAAGGAAGTGGCAGCAACATTTCAAGCCTCCTAACCCCTA  
CCTGTCTGCAGCTATGGAAGGGCCGCTGGCAGGGCAATGACATTGTCGTGAAGGTGC  
TGAAGGTTGAGACTGGAGTACAA

>680

CCAAGGAACCCTGAATAGCACTGAAAGAGATCTTTTGTACTGGGTCTCAACCACTCCC  
TCCCTCTTAGGATTTTCTCGCATCAAATGTGCTCCAGTGCTAGGTGCCTGCCAGT

CTCCACCTGCTCCTCATCCTACT

>681

TGAATTTCTTGGGGAGGAAATGGCAGAGAGGGAGCCTCTCTGAACTATTTGACTTTT  
GCCTCCTCTCAGATTTCTGTCGTGGACCAGAGCCAGGCTGTGAAGTTTGCTTTGGACAT  
GGCAAGGGGCATGGCCTTCCTACA

>682

CTGGCCCAGGCCCCAAAAGCCCTTTGCCTATCTATGACTTACCTCCTTCTATCTGTTTTC  
TCTTCTCAGATTGATGAGGACATGACTGCCCGAATTAGCATGGCTGATGTCAAGTTCT  
CTTTCCAATGTCCTGGTCGCA

>683

CAGAAGTAGTGGAAGGGGGCAGAGACAGGACAGGCAAGGGGGCCAGAACAGACAA  
GCCCTATCTCTCCAGCTCTGCAGAAGAAGCCTGAAGACACAAACAGACGCTCAGCAG  
ACATGTGGAGTTTTGCAGTGCTTCTGTG

>684

CAAGGGCCAGTGGCTTCTCTACATGACAGACTCAAATTGTGAGGCTGCTTTTTTTCT  
TGTATTCGCAGGTGGCATTGGAAGGCCTTCGGCCTACCATCCCACCAGGTATTTCCCT  
CATGTGTGTAAGCTCATGAAGA

>685

TTTTTCCCCCTAAATTTAATCTTGTAGCATTTTTGGTTACTCCTGCTTACATATTTGGCTC  
TTTTCTAGGTAAGTGGAGGTATACTTCGAATTTTTCCAGAAGGCAAAGCCCAGTTTGC  
TGACATTGAACCCAAATTTG

>686

GGAATGCAGTAGCAGAAGCTCTCTGGTGCTTAGTGAATGAATGAAAATTTTTTTTTTTT  
TTACCTTGCAGGTGAAAAAGGTGTGAGGGTTGAACTCAATAAACCTTCAGATTCCGGTC  
GGTAAAGACGTCTTCTAGAGCCT

>687

GGTTTTGAGGAATTACTCATTAGTCTCTGCACATCCACAGACATATAATTACTTTTTATCT  
GCACTGTAGGAATGATTGCAATTAGTAGGATGGCTGTGCTGTATCCTCAAGTTATTGTGCG  
ACCATCCATTTTTCTTTCT

>688

AGCAAGAAGGAAGATAAATATTTTATTATTTTGTTCACCCCCTCTTTGTTTACTTCTGA  
ACCAATACAGGTACAATTCTATTTCATGGGACGAGTCATGCATCCTGAAACAATGAACAC  
AAGTGGACATGATTTCAAGA

>689

ATTGTGACCATTTAATCAACACAGCAGTTAAATTGTATATTTACTTTTCATTGTTTTATATT  
GCTTGGCAGAAAATGAAGACAAAAGTGATATGATGGAAGAAAACATAGATACAAGT  
GCCCAAGCAGTTGCTGAAACCA

>690

GTAATATTTAGGGGAAATGGTTCTAAATTTACAGACAGAATCTTGTTTTTCTTTTCACT  
ATACTTACAGGCACCAGCTTCTGAAAAAGAAATTGTGGAAGTAAAAGAAGAAAATATT  
GAAGATGCCACAGAAAAGGGAG

>691

GACTGAGGAAATGAATGAATGAATGTCTCCATCTCAACCCTCAGCCTGGTCCCTCCTTT  
TTTCCCTGCAGTTGGTACAGATGGCATTGTCCCAGTCTGTTCCCTTCTCGGCCACAGAG  
CTTCTCCTGGCCTCTGCCATCT

>692

GGGAGTGGAGCAACGTTTCAGCCTTTGACCTTGGAAAGTGCCAGAGGTGCCCTAAGCT  
TGTCGCCCTCAGAACAGTGTCCGGGACATCACGGGTGCCCTGTTCAAGCACAGCAA  
GAAGGGGCCTAGAGCCAGCGGCAACC

>693

GATACTTGGGAAATGATGGTTTCCTTGTTTCTGTCTTCTTCTTCTCACCTTACACTA  
CACGGTTCAGGATTTGACACAGTCAACCACAGCCATCTCCTGGAGCCTCATGTACCTTGT  
GACCAAGCCTGAGATACAGAG

>694

TATAAGAGGGGATAATTCATGGGGCAGTTAGGGCAGCCCCTGAGCTCTGCTTGTCTCT  
GTGTTCTACAGACTGTGATTGGCAGGGAGCGGCGGCCCCGGCTCTCTGACAGACCC  
CAGCTGCCCTACTTGGAGGCCTT

>695

GTGGAGGTAGGAGCAACACATGCCCCAGCTTCCAGCCCTGAGCCTCACAGTGCCCTC  
TTCCCTCCTCAGCACAACAAGGGACACAACGCTGAATGGCTTCTACATCCCCAAGAAA  
TGCTGTGTCTTCGTAAACCAAGTGG

>696

CCCTCCCCAGGCACCTCCTCCCAGGGCCTCTCCAGCCCTGAGGTCCCATCTCCTCTGT  
TCCTCTTGACAGAGAGCTGTGGGAGGACCCCTCTGAGTTCCGGCCTGAGCGGTTCTCA  
CCGCCGATGGCACTGCCATTAAC

>697

AGTCTCTGGGCTGTCAGGGCTCGGGCTGGGCTGGGCTCTCGTTGTTAATGGTCTTCCCC  
TCATCTTGACAGGAGCCATGTGGCTAGAAATCCTCCTCACTTCAGTGCTGGGCTTTGCCA  
TCTACTGGTTCATCTCCCGGGA

>698

GAAACAGACTTTGCTCTTGCTCTGTCTTCCCATCCCTCTCAACTGGGGTCTGAA  
TTTTGCTCCAGGACTTACACCAGAGGATCGATAAGTTCCGTTTCACCCACCTTTGGAG  
GACAGCTGCTTCCACTATGGCT

>699

GGGGGTGCCAGAGCCTGACCGTGCAGGGTCTTCTCTCCTCCACCCTGACTGTGCT  
CTGTCCCCCAGGGCTGGACATCCACTTCATCCACGTGAAGCCCCCAGCTGCCCGC  
AGGCCGTACCCGAAGCCCTTGCT

>700

AACACCAGAGGGCCCAAGGAGCAATCTGCCTGTGACTCCGTGACTCCATGCCTTTCCC  
CATCACTGCCAGGGTTCAACTCGGTGGCCACCGCCAGGATCTTTACAAGCTGATGCT  
GCGGCTGGGCTTCCAGGAATTCTA

>701

CGCCATCTCTCCTCTCCTGTCTTACACCAGCCCAGCCTCACCCCGGCCCTCTC  
TCTGCCTTACGCCAGTGAAGGCCTGCACTTGAACATGGCTTTGGTTTTAAGCAACT  
TCTTACCCTGACCCTCCTCCTG

>702

CATCACACTGAAGCTCCAGCTCTCTGGTCCCCAGGCCTGAGTCTCTCCCTTGCTCCCC  
GCTCCCGCCAGGCTCTGCTCTGAATGACTCTCCTGTGGGTCTGGCTGCCTATATTCTAG  
AGAAGTTTTCCACTGGACCAA

>703

TTTCTGGCTGCCCTTTGTACACAACCTGCATGTGGCACTGAGAGTGGGGCTTTGTGTT  
TGCGTTCCCAGGAAGTTCTCCTGGACGACCTGCTGACCAATGTCATGCTCTACTGGA

CAACAGGCACCATCATCTCCTCC

>704

ACCCCTGCTGTGCAGACGGAGGGGCGCAGGGCCACAGCCTCACCCCTCCGTCGGCT  
CTTCACTTCCAGGATGAAGGTCTATGTGCCACTGGCTTCTCTGCCTTCCCTTTTGAG  
CTATTGCACACGCCTGAAAAGTGG

>705

TTATTTTAGTGAAACGATGCAGGTTTAAACAGTAACTATGTACTTTTTCTACTGTCTTC  
TCCTTCGTAGGACAAGAAGTTCTGTTTGTCTCCGGTCATCAGACTGTGCCTCAGGATT  
GTGTTGTGCTAGACACTTCTG

>706

GCACCTTAGTGAGTTGATCATAGAACATGAAATCCAAGTTTCTCTATCTTCAAACCTG  
CTCCCTCCAGGTGCGGTTCTGGAGCAGCAGAACAAGGTTCTGGACACCAAGTGGA  
CCCTGCTGCAGGAGCAGGGCACCA

>707

CTCTAAGCGTGGAGCTCACTTGAGTAGGGTGACGGTGTGTGCAGTGCCAATCATCC  
CTGTTTCCCAGGATGTAGATGCTGCCTACATGAACAAGGTGGAGCTGGAGGCCAAGG  
TTGATGCACTGATGGATGAGATTA

>708

AGATTTGAATGGAACGACATTAATAACACAACACAGAACCAGATGACCGACTCCAA  
ATCTCCCTGCAGGAGCTGTCCAGATGCAGACGCATGTCTCTGACACCTCAGTGGTCC  
TCTCCATGGACAACAACCGCAACC

>709

CTGTGAACTTTGGGAAAGTTCTTCCCATCTCATATAAACAGAATCTTCTCTTTCTG  
GCTGCATCAGTATGAGGAGCTGCAGCAGACAGCTGGCCGGCATGGCGATGACCTCCGC  
AACACCAAGCATGAGATCACAG

>710

CTGACCCAGCCCCTCAGAAGGAGACACCTCAGGTCCCAAGCAACCCCACTCTCCTCCT  
TTCTATCTGTAGTGCGCCAATCTGCAGAACGCCATTGCGGATGCCGAGCAGCGTGGGG  
AGCTGGCCCTCAAGGATGCCAGGA

>711

GATCAAATAAATGGGCCATGCAGGATCAGCCTGGCAGATGGTCTCACTGAGTCCTCCTC  
CTTCTCTGCAGCTGTTGTACAAGCAGTGTTCCTCTGGATATGGCAGTGGCAGTGGCT  
ATGGCGGTGGCCTCGGTGGAGG

>712

ATAATACACAGAGGCTTGCAGGCCACTGCTCCCTTCCCCACACCTCTCTCCCTTTTCT  
TCTTGCCACAGGAACTTCGAGAGGAGGAGAGGCGTGCCACCTCCCTCCCTCTATCC  
CCAACCCCTTCCCTGAGCTCTGC

>713

TAGCAGGTGCGGAAAGGGAATGAATCACCTTTGCCTCCCCTCAAGTCGTGTGCAATT  
CCTGGGGCGCAGGTAGTAAAGGTGTACAGTGAGGATGGGGCCTGCAGGTCTGTGGAG  
GTGGCAGCAGGTGCCACAGCTCGCC

>714

CTAGGCATGTGGCTCATCCAGGAGATCTGGTTGATCTCCAATAACCCCTGCTTTTTGCC  
CTTGTCCCAGAGCGGGTTTGGAGGACCACGAGTCCGTGGTGGAAGTGCAGGCTGC  
CTGGCCCGTGGGCGGAGATAGCCG

>715

GGGCGCTGGGATGCCCTGATCCTCAACCTGGATGCTGGAGCCCTGATCCCTGACACTT  
GTCTACCCACAGCACTCCCTGTTCCAGAAAAAATGGTCTCCAGCTGTCTCGATGCAC  
ACACTGGTATATCCCATGAAGACC

>716

AACATCCTGGTGGTAGAGGGGAAGGGAGGAGGTCAGACCTGTCACTCTCCTCTGCTCT  
CCTCTGGCTCAGAACTTCTGAATGCTGGCAGCTTCTGAGATCCAGGGCTTCTGCA  
GCTGCGGGGTTTCAGGACGGAAGC

>717

TGGCTTGTGGGGGGAGGTAATAGTGGGCGGGATCTACCTGTACCAAGTCCTGCTCACT  
CATGCTGCTTAGGATCCGAGGCACCTGCAGTACGTGGCAGATGTGAACGAGTCCAACG  
TGTACGTGGTGACGCAGGGCCGCA

>718

TATGTGGAGCAGGGGCAGACATGTGGTCTAAAGGCAGATATGGGACCAGTCAATTC  
CTCTCTGCAGCCCAACAAGCTTCGAAATGGACACAAGGGGCTTCGGATCTTCTGCA  
GTGAAGATGAGCAGAGCCGCACCT

>719

TGAGGGGGGGCGTCACAGCCACGCCCCAGGACCTCTCGACCTCAAGCTCTTTCTCT  
CCCCACCCAGTACGGGGTGCAGCTGTACAAGAATTACCAGCAGGCACAGTCTCGCC  
ATCTGCATCCATCTTGTGGGCT

>720

GGGTATGCAGGCCCTGTCTTACGGGTACCTGGGCCCTGTTCTGACCTCTCTCCTCTCCT  
TCCATCTCCAGAGAAGTGCCTCAGATAATACCCTGGTGGCCATGGACTTCTCTGGCCAT  
GCTGGGCGTGTCAATTGAGAACC

>721

ATCCCAAGTGGGGAGTAGATGGTATAGGGGTCCCCTCCCAAAGTGACCGCCCATGTCCT  
TCCCACCACAGCCATCCACCGCACCCAACTCTGGTTCACGGGCGCATTCCCGTGAG  
GAGAGCCAGCGGCTTATTGGACA

>722

AGAGACTGGGGTCCAGGTGGCAGCCATGGTCTTGGGTAGTAATGCTGCCATCTCCT  
GTCTTCTGGCAGCCTGTTCTGGTCCGGGAGAGTCAGCGGAACCCCAAGGGCTTTGTC  
CTCTCTTTGTGCCACCTGCAGAAA

>723

CTGGCCAGGAGGGAGCTTCCCAAGCCTCGGGCCCTCCCTGAACTTCCACCCCTTT  
ACTGTACCCAGAGCGAGGAGGAGGGTGCCTGTACTTCAGCATGGATGATGGCCAGA  
CCCGCTTCACTGACCTGCTGCAGC

>724

GTGAAGGAAATTGACTTTGTCAATGACCAGATTTTTATATCAACCTTCTTTTTTCTGTC  
CTTTCTTAGCACTATTTAGGAGCCTACGTTTTTATTATCTTACCAGGCTTCTCATTACC  
TTCTTGGCTTTTACCTTCT

>725

ACGATCAAGGAACGCAGCCTTCTGTTGCTCTTAGCAGTAACCAGGCATGTCCACTGG  
CTGTTTTTGAGTTCTTTAATTCAGTGGGCTCTGGGATTCATCGAGAACCGAGAAAG  
CCGGCATGTCCCAACAATGAAG

>726

CTAGGCAACCAGTAATTTGGTTAAAACCAAAATACGTGTTCTGAATTACTGTTCTGTG  
TTTATTTTCAGGCTTCTGGAGTTACAGTGAATGATGAAGTCATCAAAGTTTTTAATGATA

TGAAAGTAAGGAAATCTTCTA

>727

TATTATCATAGTCAGTCTTACCTTTGTTTTCTTATAAATGGGATTCAATAATTTTTTTTTT  
TTCTGTAGGGCTCCTGAAAGTGCACCTTAAAAAGCAAGATGATTTATGCTAGCTCTAA  
AGATGCCATTAAAAAGAAA

>728

ATATTTGGGGCAGAGAAATTATTCTTTATTAATTATAATAAAGTAATAGGATAATGTTTTT  
TCTTTTTAGGTATTAACATGAGTGGCAAGTAAATGGCTTGGATGATTAAGGACCGTT  
CGACACTTGGAGAGAAATT

>729

TTTGACTTCTCAGAAATATATAGACCAACAGTGGTTGCCTTTTTTCATTTTCACTTCTCT  
TCATTCTTAGATCTACGGAATCCAGAGGCAGCATTGTCTCCAACCTCCGTAGTGACAG  
CCCAGTGCCTACTGCACCCAC

>730

GTTAGGATTTACCACTTATTTTCAGTTCACGGTCAGTGTCTTATTGCCATACCTCCCCT  
CGTTCTTAGCCAGATGCTCCTGCCACTCAAGATGGGGTAGAAAGCCTCCTGCAGAAG  
TTTGCAGCTCAGGAGTTGATTG

>731

TTTGC GGAGTTGGTCTAAGAGCCAGTTTGTCTATAAGACATTTAAGTCCAAGGCTAC  
TTCTGTCACAGGTCAGTCAGGAGATCCTAGAGCTATTAATACTACAACAGCCAAGGA  
ACAATCCATTGTTGAAAAATTC

>732

TCATTTGGAATTTGAACTGTTGGATCTACATCTGGAGCACCATCTTGATTCTCCCTTTTT  
ATTTTCCAGACGAATTATCAATAAACACACTGATGAGTCTTTAGGTGACTGCTCTTTCC  
TTAATACATGTTCCACATG

>733

GAAAAGAGGGACTCGGGCCATGAATCTCAGAGTTAAAGTAGGGAAGATGACCAAATA  
CCACTTTATGCAGTGGATCTGTTGTGATATCCGCTACCTGGACGTCAGTATCTTGGGCA  
AGTTTGCAGTTGTGATGGCTGACC

>734

TCTATAAATGGTACTACCCCTAACTGTAAAAGTTTGGCTAAAATTCTAGTTCTTTTTTA  
TGCCCCACAGGTATGAACGGGTAGATGAAATTATTTGGGTGAAGACAAATCAACTGCA  
ACGCATCATTCCGACAGGCCGT

>735

TAAACATAATAGAAAGGGCTAGAATTGCAATCTTGTGTA ACTTAAAAAGCAGCTAGTTT  
TTATTTCCCTAGTTTCGTTCCACCAGTCATAAACAGATGAAATCTATGGCATGATTGAAA  
GACTATCTCCTGGCACTCGCA

>736

CATTTTTTAACAATATTAACCCTCTAATCCAGGATTTCTGGTTTGCCCCTCCTTTTACA  
CTGTTTCAGGATCACCTTGAAACCAACTGGATGGGATCCACCTACTAGACCCAGAT  
GTGGTTGCACGGTTCAAGCAA

>737

TGTTCTTTTTTGAAAGCTTTGTAATATAAATATGGAATTGTGTTTTATTTCCATTTTTT  
ATTTTCAGGTGTCTGCTTTTGGGGCAGAGTTTTCATCGGAGGCATGCAGAGAGTTAGG  
CTTTTCTAGCAACTTGCTTT

>738



TTTGTCTTAGATGAGGCTGAGAAGGTTGTTTCTGAACAGAAAAGTAATGATGACGTCCC  
TCTTTTTGTAGTATGTCCGTGGTTCAGACCCTGTATTAAGCTTTTGGACGACAATGG  
GAACATTGCTGAAGAACTGAGCA

>739

TAAGACACTACAGTGTGTGCATAACCAAGACCTGATCAGGGAGTAGTTACTTCTCTTC  
TTTTCTTACAGGAAACATGGTTCCAAAACCTGTTCACTTCCCAAATTTGTCTGCTTCTTCT  
GTTGGGGCTTCTGGCTGTGGA

>740

TAAGACACTACAGTGTGTGCATAACCAAGACCCGATCAGGGAGTAGTTACTTCTCTTC  
TTTTCTTACAGGAAACATGGTTCCAAAACCTGTTCACTTCCCAAATTTGTCTGCTTCTTCT  
GTTGGGGCTTCTGGCTGTGGA

>741

TGAGACACTATAGAGTGTGTGCATAACCGAGACCGGATAGGGGAGTAGTTACTTCTCTTC  
TTTTCTTACAGGAAACATGGTTCCAAAACCTGTTCACTTCCCAAATTTGTCTGCTTCTTCT  
GTTGGGGCTTATGGGTGTGGA

>742

TGAGACACTATAGAGTGTGTGCATAACCGAGACTGGATCGGGGAGTAGTTACTTCTCTTC  
TTTTCTTACAGGAAACATGGTTCCAAAACCTGTTCACTTCCCAAATTTGTCTGCTTCTTCT  
GTTGGGGCTTATGGGTGTGGA

>743

TGAGACACTATAGAGTGTGTGCATAACCGAGACCGGATCGGGGAGTAGTTACTTCTCTTC  
TTTTCTTACAGGAAACATGGTTCCAAAACCTGTTCACTTCCCAAATTTGTCTGCTTCTTCT  
GTTGGGGCTTATGGGTGTGGA

>744

GTTAGGGAATGGGGAAAGGGGAGCGAGCCAGAGAAAACCTGACGCCCTTCCCTGC  
TTCCTTCTCCAGGGACCCCTCGGAGGAGCATTGCTGCTGGTGAATTGATTCGACCTG  
ACTGCCGTTGGACCGTAGGCCCTG

>745

CCAGCCCTAGCCCTGCCTTCCAGAACCGTAAGGGTCTATCTCCACGGACTGTGCC  
ACCCACCCCAGATGAAGGAGTCCGCTGCCCCGAGTGCTACAAGAAGCCTGGATGTTCT  
ACAAACATACTCGCAGGAAGGAGT

>746

TTCCTCCCCTGAGCTACAGCTACATTCAGGGACCAGGCTTGTAACCTGACTCCCCACT  
TGTTCCACAGGTTCCGCCAGGTGCGGCTGAAACACCGGAAGCTCCGGGAACAAGTG  
AACTCCATGGTGGACATCTCCAAG

>747

TGCCTTACGCTATGGAGTAGGTGGGGGTCGACCCCAGCCCCGACACCTCTGATCCTCTC  
CTCCCACCCAGATGCACATGATCCTGTATGACCTGCAGCAGAATCTGAGCAGCTCACA  
CCGGGCCCTGGAGAAACAGATTG

>748

CCTCGGTGTGTCCCACTCTCACTCTCCCTTACTGGCCTGCCTCTCCATCAGTCTCTCT  
GTCTCTCCAGGGACCCACGAGGAGGAACCAAGGCTACTTTCCCAAGTACTGAGGT  
GGTGGACATCGTCTCTGCCACTC

>749

CCCCTCTATCCGTCTCCAGTCAGGGGCCTGGTGTGTGGCCCCGCTGACCCCTCCCC  
TGCCTCCTCAGCCCCAGGATGGGTGAGTTCAACGAGAAGAAGACAACATGTGGCACC

GTTTGCCTCAAGTACCTGCTGTTT

>750

CCCCACCCCAACCCCTCCCGGGCCACCATCAGACCTGGGCAGATGCGGTGACCTTTGT  
GACTGCTTGTAGCTGGCTGGCCTGGCTGTCATGGCAGTGGGCATCTGGACGCTGGCCC  
TCAAGAGTGAATACATCAGCCTGC

>751

CTGCTCTGAGGTGCACTAGGTCTAGGCACTAGGCCTCAGAACAAGGGTGCCCTTGTGC  
TGCCCCCCCAGTACTTCATCCTGCTCCTCATCATCTTCTGCTGGAGATCATCGCTGGT  
ATCCTCGCCTACGCCTACTACC

>752

CTGGGGCTCTGCCAGCCCCACCTTGAAGGTCTTAGACTGAGGCTGAAGTTTCCTGCA  
CCCCAACCCAGCTGAACACGGAGCTCAAGGAGAACCTGAAGGACACCATGACCAGG  
CGCTACCACCAGTCGGGCCATGAGG

>753

CAGGGCCTCCCTGGACCTCTGCAGGAGCCTCTGGCCCCAGGTCTCAACCCAGCCTTG  
TTCTTGATGCAGTTCCACTGCTGTGGCAGCAACAACCTCACAGGACTGGCGAGACAGTG  
AGTGGATCCGCTCACAGGAGGCCG

>754

GCTGGAGGCAGTAGGGGCCAGTGGGAGGTGCCCCCTGGGCCCGCCTTCAACACCCAT  
CCGCGCCCCGAGGGCGGCTGCATCACCAAGTTGGAGACCTTCATCCAGGAGCACCT  
GAGGGTCATTGGGGCTGTGGGGATCG

>755

GGGACACGGGGCAGGGCGGTGGCTGGTGGCCCCATGACGTCTGCTTACGCCACCCG  
GCTCTGCACACAGGTCTTTGGCATGATCTTCACGTGCTGCCTGTACAGGAGTCTCAAG  
CTGGAGCACTACTGACCCTGCCTTG

>756

TTTTAGGGAGCCCTAGCAGTACCTAGGTGAGAGGGGAGGTCTGACTTGCTCCCCAAAA  
CTCATCCCTAAGAATGCTCCTGCCAGCTGGACTAAGACAACGTGACCAGACAAAGA  
AGAGCCCAACGGGGCCACTGGACC

>757

AAGGAAACCTGGAGGCCAGGATCTTGGGAGAAATTACCTCTACCTGAGCCATCCTTCA  
TCTCCCCATCAGGGAAACCCTATATTCAGCCCAAGAGGGAAATCCCAGCAGAGGAGCA  
GATCACCTGGAGCCTGAGCTGGA

>758

AATAGGTAGGAGGGAGGCTTGGAACAGGTTCTTCTCATTCCCTGTGACTCCTCTTCTT  
ACCCTCTCCAGCAATTCTGGACATGTACACACTGATGAGTAACAAGCAATACTATGATG  
CCCTCTGCAGTGGAGAAATCTG

>759

GAAAAGAAAACCAATGGGGAGGAGATTATGGGGAAACATGTTGGGGTTCCCTTCTGCC  
CTCATTACCCAGGTGTGGTACAGCCTGACAAGTATAAGCCAGTGCCGGATGAACCCCC  
AAATCCCACAAACATTGAGGAGAT

>760

ACCATAACACCCGATAACCACTGACATCCGAGAGTCCCTTAGCCCACCATCTCCTATTC  
CCCTCCGATAGGACATCCCAATACCCATGCTAAGTGAGCTGTGTGAGGCAATGAAGGC  
AAATACCTATGTGCGGAGCTTCA

>761

TCCTGTTCTTTCTTTCCTCAGTCATCTGTGAAACTGTTCCCTAATCCTAACCCAAGTCCC  
TACTACCCAGGCAGTGGCTGACATGTTGCGTGAGAATCGTAGCCTCCAGAGCCTAAAC  
ATCGAATCCAACCTCATTAGCA

>762

GGGTCTGTGATGTGGGATGGTAAACAGCCCAGAGAGGGTGAAGTGTGACTGTCAGCTTTTGCCTC  
TCCCTCCCCAGCGCCAGTGGCTGGTGTGATGCAGTGGAGATGGAGATGGCCACCGTGC  
TAGAGCAGTGTCCCTCTATTGTCC

>763

AAGAATTAGACAAGGATGTTTATATAAACACTTTAAATGTATTTGATATAAAATTTTATT  
TCTTTGTAGACCCAGAAAACCCAGAAAGTGGTGATACAGTGGAAAGTACAAGTGAATGG  
AAATCTTGTGAGAGAACCTGA

>764

TCTGCATTGTATCATGGACAAAACTGGTGGTAGGAATCAGTGTGTTTGTGTTTCCTTTCAT  
GCTTCTACAGAGAATCAGCTGTTAATCTAGTGAGGAGTGGCTCCTATACCCGGCAGCTA  
TGGAGGGATGAAGCAAAGGA

>765

TCTGTGCCAGTGCTTTGTTGTATAGCATGCCTAACCATTTCTTTCTGCTTGTATCTTTTT  
AAATTTCCAGGACTCCTCACAAATCCAGGCCGACACAACAGCAGAGAAAACAGCAGA  
CAATGTCTCTTCTAGCACCCCG

>766

AACACTTTGTCATTCTCAAGTATATGCAGCAAAGATCTTGCTTTTGCTATTACTTTTTTT  
TCTCTGCAGGCTCTATCTGACTCCTGTACGGGATGAGGAAGCAGAGTCTTTACGGAAA  
GCACGCTCCAGACAAGCTCGG

>767

TATTCCTGATCAATCAAGAGTTATCCATGGTTAGTGTGAAACAGCCCTGATCTTGTGAT  
ATTTTCCAGGGTGTACCCTAACAGACCTTCAAGAAGCAGAAAGGACATTCAGCCGG  
TCGAGGGCAGAGAGGCAAGCTC

>768

TATAAACCTGCTGCCTTACTCTTTAGATGGACTTGATTTCTAATATCTCATATTGTGGAT  
TATTTCCAGCCTATCTGTCATCGCCTGAGGTGCCAGCTCAGCCAGACAAACCCACCAC  
GCCAGCATCTCCTTCTACGT

>769

AGACACAGGCCCTCCACAGTGCACATCCCAGATTCTTAAAGTTCATACTTTATTTTAT  
CTCTGGCCAGAGAATGAAGAAGCAGATTTGGATGAGCAGTCTCTAAGAGGCTGTCCA  
TCCGAGAGAGGAGGCGGCCAA

>770

CTGAGCATTACCTTCTCCCACTACTTTGTTCTCAAACCAATTTTATCTTTAATATTAT  
CTCCACAGGTTGGAATCGGGAGGTAGTAATCCTACAACCAGTGATTCTTACGGTGAC  
CGGGCTTCAGCAAGAGCCCGT

>771

GCATTCTCATGTGATGAAATGGTGTGAGTTCTAACGCGAACGCTGATCCTCTTTTTTCC  
CTCTCCTCTAGCTCTATGAGAGTGCTCTGACTGAAAACCAAAAAGTAAAACAAAAGT  
TCAGGAAGCCCAGCTAGAGCTAG

>772

GGCCTGGTCAGGGAGGGCCAAGGAGGATCCTGCCAGGCTCTAACTCACCTTTCCCTCT  
GTCACCCCTACAGGTGTTAACAGAAGTAAATCCGACAACCAGAGGCTGAAAGATGAA

AATGGTGCCCTCATCAGAGTCATCA

>773

ACTGGAGGTGCAGGGGGCCGGACTCAAGCCCAGAAGCTGCCTGCACCAACCACCCAA  
CTTCTCTCCACAGCCCTGGAGCCCACCTCCCAGAAGCCCGGTGTGGGGGCGGGCCAC  
GGGGGAGATCCCAAGCTCAGTCCCCA

>774

AGTGGTCCCCCTGTCTCGCTTCCAGCCCAGAACCATCTCTTCTCTCCATCCCTGCCCT  
CGGCCCCACAGTCCCACGCTGCTGGCTCCAAGCAGCACGAGAGCATCCCGGGCAAGG  
CCAAGAAGCCCAAAGTGAAGAAGA

>775

AGTGGGCACTTCTTGTTAAATTTACCATTGAGACCCTGGTAACACTGAAGTTTGTGTTG  
ACTTTCTGTAGGTGTTTTACAGTCTGTGTTTGGTATGGAGAGTGTGGAATTGCATAT  
GGGGACAAGAGGTACAATTGCG

>776

GTTCACTGAGGAATGTTGACCTTACTCTAACTGTTGCCTACTCCCGTGTCTGTGCTCTTT  
CACCTGAAAGGAACTCTGTCCAGGATTCTTCTTTGGCAATGTCAGTCTCTGTTGTGATG  
TTCGGCAGCTTCAGACACTAA

>777

TATTTAAATCGTTCTTGCTGGCCCTATTATGTGTGAGATCATGCAGAATATAATTTACTT  
TTCCTTTAGATGTCCATCCTGTTTTATAACCTACTGAACCTGTTTTGTGAGCTGACATG  
TAGCCCTCGACAGAGTCAG

>778

TTGTAAGATCTTGCCTCGTGAATTACAGCAAGCATCTGTCTCCTTTTTCTTTGGGTTT  
CCTCTTCTAGCAATGTACAATGCCTGCCGGGATGTGGAGGCCCCCTCAAGTAATGACAA  
GGCCCTGGGACTCCTGTGTGG

>779

GTTTAAGTATAATACAAAATTTGGATGTTTTTAATTGAGATTTGACTCAACACAATTC  
CTTTCTGTAGATTTCCAGTCCATGGGATGGAGCCCATGAACAATGCCACCAAAGGCTG  
TGACGAGTCTGTGGATGAGGT

>780

TCCCTGTTCCGACTTTCAGGAACGGCTTGGCTCTTAACCTCCACCTTCCCTTCCCTCC  
CGTTCTTCCAGGAGAGGCGTCTGCTGTGACCCTGTCAGCGCAGCATTGAGGGCTGC  
TTGAGGCGGCTGTTACACGCTG

>781

CTGATTAATCAAGATCTGAGAGAAATGTGACGTGTTTCTGGGTTTGCTTATTTTTAAAAT  
CTTCTTTCAGGTTCTTGACTTACAAATAGCCATCGAAAACATTACTGCCTCTTATGACAA  
TGAGACTGTGACACTTCAAG

>782

TGTAAATGTTTAGGTCCCTGATGTCTTGAGGCCCTTCTAACTGGGAGGTGTTTTCTAAA  
CTTTTTGGCAGGGCTCCTGCCTCTCTGAATGATACAAGTTTGCTCCATGACCCTTGCT  
GGGTACGTTTGGTGGACCACTG

>783

TCCCTGGTATGTGTCTAATTTCTGCATGCTTGTAACTGCTTTTTGATGTCACATTTTT  
CCTTTCTAGATCAAACTACAATAACGCCACTGCCCTTGATTACCTTCCCTGTCAATA  
ATTACTATAATGATACAGA

>784

TTAGGGAGAAGTTTCTTACTTAGCTGTCTAGTTAGTTTAACTAAAAATATAACATTTTGCT  
TACCTTTTAGGTTTATTAATTTGTGAAAACTACAAGAATCCAATCTGACCATTTCCT  
TCACTGCTGAACGAAGTATT

>785

GACCTTTTAGTAACAAGTGGGACAGACAACCCTGTAACATAATTGGTGATTGTGTCTGTC  
GCCTCTCTCAGGTGGATTCTGAAGGTCTCACTAGGCATCGCGGCATCTTGATCGTGCTG  
AGCTCGGTGGCTTGCTCCTTGG

>786

CAAGGCAGCAAGAAATGGCGTTGTTATTGAGAAATTTTAAATGTCGCATAATTTTTTTTTT  
TTTTTTAAGAGAGATGAACGTCTTCAAGGGGAAACCCTGGATCAGCAGCTGGGCAGG  
GTCCTAGGAGAAGTGGCTCCCA

>787

TGAACATAAGACCTGCAGAGAGCCCCGGCTGTAAACAGAAGTGACGCAGAGCCCTT  
CTCTCCCGACAGGAGCATTGTCCGTGATGCCAGCCGTGCACACCTTCTCTCTTTGC  
GGGATTGGCAGTCTTCATTGACTT

>788

TTTAATTTGAGTCTAGAATCTAGAGGAAGCAGCTAGCGGGTATAACCTTTGTTCCCTC  
TGTCCTCAGAAAAATCGGCTAGACATCTTTGCTGTGTCAGAGGTGCTGAAGATGG  
AACAAGCGTCCAGGCCTCAGAGA

>789

AAGATTTTATTTCTGGTCGTAAGCTTATTACTAAGCAGTCTCTGTCTTATGATTCATTTG  
TTGTTCCAGATAGCAATATTTGTGGGTGTTCTGTCATTGATCAGCATCGCAGTCTGAACAA  
AGTAGATATTGGATTGGATC

>790

AAGAAAAAGTACTGAACTAAAGACTTCTCCCTGTGGAGCAGGTCAGTAACCCTGTC  
TGTCCTCTCTAGTACCCGAATAGGCTTCGCCCCCTCGTCCTGGATCGACGATTATTTGCA  
CTGGGTGAAGCCACAGTCGTCT

>791

ATTTTAAATGTTTTACAAAAAATCTGGAGACCTATTCTTCTAACAGTCTCCCTGCATG  
TCTCCGCCAGTGGTTGACCCTGCCTGCGTTCGCTGCAGGCCTCTGACTCCGGAAGGCA  
AACAGAGGCCTCAGGGGGGAGA

>792

TCAAGTGCTCAGATTCTGCTGATATTTGCAAGACCTGGACTCTTTGACACCCAGGAT  
TCTTTCTCAGGGGACATGCTGCCTATAGTTCTGCAGTTAACATCCTCCTTGCCATGGC  
ACCAGGGTCGGAGCCACGTAC

>793

GTGACAGGATGAACACGCAGTGTTCCGGGAGTGAGAGCGAGCTTTAATGAGGCCTCCC  
CTCTCCCCTCCAGTGTGTTTTATGTCTTCTACGAACAGTACCTGACCATCATTGACGAC  
ACTATCTTCAACCTCGGTGTGTCC

>794

TCAGAACGGGGTGGCTGCCTAGGGTCTTCAACAGGAAGAGAGCCATCCTAAAGGAAG  
TGCTTTATTTTACAGAGCTGTGGCATCTCCGTGGAGTTCTGCAGCCACATAACCAGAGCGT  
TCACGGTGAGCATGAAAGGCAGCC

>795

TGTAAGGAAGTGTTTTTGTTCAATTACAGGTTGGTAAAAGTGGTTTCTAACACAGTATC  
TCTTCTTTTAGGTGTTTCAAGTGAATCACACTTACAAAATTTGGAGGGATTGTGGTGTG

GCTTTTGCCAAATCTCAAATTT

>796

GTGAGCCACTATGCCAGCCAAGCTCCCTTTCTCCTGCAGAAATAAGAAAAAGTC  
TCTCTCATAGGGCCATCAGTAAATAAAGCCAAAAGTTGTGCCACTGAAGAGCGATA  
CAAAGGAACAGAGCGCGAACGGCT

>797

GGCTCTGAATTTTTCTAAGAAAAAATGGTAACTATCACTTGTTACTACTAACCAAAAA  
TTTTCTTTCAGAACGCTCCAGAATAATCAGTTGAAAACAGTACCCAGTGAAGCCATTC  
GAGGGCTGAGTGCTTTCAGTCT

>798

GTTGTGAGACTTGAAGTACTCATTCTACTAGAATTTGTTACTGAACATGGTTGTTTT  
GTTTCTGTTAGGCGTTTAGATGCCAACCATATTACCTCAGTCCCCGAGGACAGTTTTGA  
AGGACTTGTTTACGTCAT

>799

CATATAAAACAATGATAATAGTTGCCAATGGGAGATGGAAAAGTCATTTTATGCTTTTT  
TCCCCCTTAGGCATCTTCATAACAATAAATTAGAGGCCTGAGTCAACACTGTTTTGAT  
GGACTAGATAACCTGGAGACC

>800

CAGTAGATACTGGGTTTTATTTTCGAAGAGGATAATGCATTTCAAATACTTTTCTCCT  
ATCTTTCTAGAGGATTCATAGTAATTCTATTTCTGTTATCCCTGATGGAGCATTGATGG  
TAATCCACTCTTAAGAACT

>801

TGAACATAGAGTTAATATTAGAGTGCTTGTGAACATATGAAAATTTACTTTTTTTGGAT  
ATTTTACAGACATTTGTATGATAATCCTCTGTCTTTGTGGGAACTCAGCATTTCACA  
ATTTATCTGATCTTCATTCC

>802

TATATGGGAATAAATTTTGCTTACTATCTTGAGTTGAATTATTTCTTACATGAATAATGTTT  
TTCCGCAGGACTTTGACAGGTACAAAGATAAGCAGCATACCTAATAATTTGTGTCAAGA  
ACAAAAGATGCTTAGGACT

>803

TCTTTCCTCCTCCTGTTCTTCTTTGTCTTTGTCTTCGTCTTCTTCTTCTTTTT  
TTATTTAGTTCTTTACAGCGTAATCAAATCTACCAAATAAAGGAAGGCACCTTTCAAGG  
CCTGATATCTCTAAGGATT

>804

AGTATAGTCTAAGTAAGTGGCATTCTGAGTGTTTATTTGAAAGATTAACATGTTACTCTT  
ATAATTGCAGAGATCTGAGTAGAAACCTGATACATGAAATTCACAGTAGAGCTTTTGCC  
ACACTTGGGCCAATAACTAAC

>805

AATACGTGTACAGATGTTTTATGTGATTTATATATTGGGCATTAAGTCTCATTCT  
ATATTTAGAGATGTAAGTTTCAATGAATTAAGTCTTCTTCTACGGAAGGCCTGAATGG  
GCTAAATCAACTGAAACTT

>806

TACTTTTACAAAACAAAACCATAACTGCGGAGTTGCTGTTTCAAGTGTAGATTTTACAACT  
TTTTTTCCAGGTCTTTATCAGTACCATATGCTTATCAGTGCTGTGCATTTGGGGTTGTG  
ACTCTTATGCAAATTTAAAC

>807

TTGCAGGAAAATATGGTTCTTTGAGTTGCATAAGGTTTTAATTAACATGCTTTGTGTT  
ATATGTTTCAGGACTGCTGATGCAGCAAATGTCACAAGCACTTTGAAAATGAAGAAC  
ATAGTCAAATAATTATCCATTG

>808

GCCATATCATTTTCTAAATTGTTTTCTAAGTTATCTTTATTTCTCTCTCTGTGTGTGTT  
TTTTTTAGGTGCTTTTAAGCCCTGTGAATATTTACTGGGAAGCTGGATGATTCGTCTTAC  
TGTGTGGTTCATTTTCTT

>809

TACCTTATACACAAAATATTTATGTTCTACCTGCCTGTGAAACGTCTAAAAGCCTCTCCT  
CTCTCTGCAGACAGAGCACACTCCTCCGTATGATGTGGTACCTTCCATGCGACCAGTGG  
TCCTAGTGGGCCCTTCTCTGA

>810

GGCATACTTCTATCCCCTTTGATTAGACCAATAACCTTAAGGTCTTCTGTGACTTTTT  
CCTCCAACAGGATATCCATCACAAAGGTCACCGCTGACATCTCGCTTGCCAAACGCTC  
GGTATTAACAATCCCAGTAAG

>811

AGAAACAGTATACCATTTTACTTTATCTTAAAAATACTGCACCTTAACTGAATTGTTTCG  
CCCTTTACAGCGGAAGTTCAGAGTGAATCGAAAGGATTTTTGAACTTGCAAGAACAT  
TGCAGTTGGTGGTCTTGACGC

>812

GTCAATAATGTACCTTGTACTTTACCTGGATGTAGTTATTACTCTGTAAAAACTCATTAT  
CTTTTACAGTTTTTACAAAGGTTAATAAAATCTCGAGGGAAATCTCAAGCTAAACACCT  
CAACGTCCAGATGGTAGCAG

>813

TCTTATGGAGGTGGGAAGGGGGTGAAAACCTGGGCTGGCATCAATGTGGTCTGGAATGT  
CTGCCTCTGCAGGAGCTGTTTCGATGTGATCTTGGATGAGAACCAGCTTGAGGATGCCT  
GTGAGCACCTTGCCGACTATCTGG

>814

CACTTGCTCTGGGACATGTTCTTTACACACTGACCTTGGTTAACGCCTGGTGTGCTCCT  
TTCGCTGCCAGGGTCTCAAGGTGATCAGAGGACTGATCGCTCCGCTCCTATCCGTTCT  
GCTTCCAAGCTGAAGAAGAAC

>815

CGGCCGCCGCCCGCCCTCTGGCGGCAGCGCGGGGTACGGCGCCGCTCTGAGCGC  
CATCGTCTACAGGTGCAGTCGGAGATCCGCCGTGGCTGGCACCCTGCCGCTGCGC  
CGCAGCCTGGGCGAGGAGCAACGCC

>816

TGACCTCCTGCCCGGCAGGACCTGAGTGTGAGGGTCTGTCCCACTGACACCCTTTC  
TGCTCCTCTAGAACCGTACGGAGTCCCAGAACCTAATGCCACAGCGACCCCTGCGA  
TCCCCACTATCCTGGTGACCTCTG

>817

GCGGCTGGAGTCTGAGGGGCTCGGGTGGCCCTCGAGGGAGCCCTGACCCTGCCAC  
CCCCTCCCACAGCACTACCGAGGACGGGAGGCCCTGCAGTTCCCCTCCGCTACG  
GGGGCCGCATGCTGCATGCCTGCAC

>818

CTCCAGGTGGTGGGGTGGGGTGGGGGGCCTCTGCCTGGGACCCCATGCACGCAGG  
TGTCGCCCCCAGGTGTGCCACAACCTACAACACTACGACCGGGACAGGGCCTGGGGCT

ACTGTGTGGAGGCCACCCCGCCTCCA

>819

GCAGAGAATGTCACAGAGGGACCCTGAGCCTCCAGTCCGCCCTCACATCCCCTCCC  
GCATGTCCCCAGCTGCCCTGGATCCCTGTGCCTCCGGCCCCCTGCCTCAATGGAGGCTCC  
TGCTCCAATACCCAGGACCCCCA

>820

AGTGCAGGGCAGGGGCCCTGCACGGGGACAGCAGGTGGCAGGGTGTGAGGGCTTACT  
GTGCACCCCTCAGAGAAATGCTTTGATGAGACCCGCTACGAGTACCTGGAGGGGGGC  
GACCGCTGGGCCCGCGTGCGCCAGGG

>821

CCCCGGCCCCGACTCCGCTGTCTGTGGGGCACTGCGCGGCCCTGGCCCAGCTCCTCGG  
CCCTGCCCCAGCTTGTCTGAGCAGCCCTGCCTGAACGGGGGCACCTGCCACCTGAT  
CGTGGCCACCGGGACCACCGTGTG

>822

CCCCGGGGTGGCCTGGGGCAGTGCCGGGTGGACCCACCGTGGGCCGGCCTCACTGCC  
CCTCTGCCCCGAGAGCCTGATGAGCGCTGCTTCTTGGGGAACGGCACTGGGTACCGTG  
GCGTGGCCAGCACCTCAGCCTCGGG

>823

GATGCCCCCTCCCATGCCCTTTCGAGGGCAGTGTGACTCCCTGCCAGCCCCACTT  
ATGCACCGCAGGAATCCGGACAATGACGAGAGGCCCTGGTGCTACGTGGTGAAGGAC  
AGCGCGCTCCTCGGGAGTACTGC

>824

AGGGCCTGTGTGTGAAGGGGGCTGGCCCTGTGAACCCAGGGGTGTGACCCGGTGA  
CCTTTGCTCCCAGAATCCCTCACCAGAGTCCAACCTGTCACCGGATCCTCGGCGACCC  
TGCCTGAGCCAGCCTCCCCGGGGCG

>825

GGGTGGGGAGAGGTGAGCCCGGTGGCTGGGGGAGGGCTGGTCCATGCAGCCTCCAGC  
CCCCCTTGACAGCCCCCAGGGACAGCGTCTCCGTGGTGTGGGCCAGCACTTCTT  
CAACCGCACGACGGACGTGACGCAG

>826

ACCACGGGCCCCGACAGCCTCCCGTTCAGCCCGCACACCACAGGCTGACCCTGGCCA  
CTCTTCTGATCAGTCTGATCCGGCTGAAGAAGAAAGGGGACCGCTGTGCCACAGCT  
CGCAGTTCGTGCAGCCCATCTGCCT

>827

CCCAGCGTCCGCCAGGTGGACAGGTGGCCAGCCACAGTGTGGTGTACGCTGAGGGC  
ATTGTGTCCACAGACGTGAGCGGCTACTCCAGCTCCCTGCGGGAGGCCCTGGTCCCCC  
TGGTCGCCGACCACAAGTGCAGCAG

>828

CACTTGGGGTAGAGGGGTGTCCCTGAACCAGGCCCTGGGAGGGTGGCTCTGACCAA  
CGTCTCTGCCAGGGGGACTCAGGGGGGCCCTGGCCTGCGAGAAGAACGGCGTGGC  
TTACCTCTACGGCATCATCAGCTGGG

>829

AGACGATTGTTCTGTGATCTGGGTAATTGCTTTATTTTTAATTGTCTGTTGTTTTTTTT  
CCTCATCAGGTGTAGGGAGTGAAGTCTCACATAGGAGGACCTGTGTGAGCCTCACTAC  
CCAGCGACTGCCAGTTAGCAG

>830



TGATCTTAACTCCTGACCCTGAGGCTTTGAGAACGTGGCTAACTTCATCTGTCTTTTCC  
TTGCGTTACAGTTTTATTACCAAACGTGGCCTAAAAGTCTGTGCTGATCCACAAGCCAC  
GTGGGTGAGAGACGTGGTCAGG

>831

AGATGATTGTTCTGTGATCTGGATAATTGCTTTATTTTTAATTGTCTGTTGTTTTTTTTTC  
CTCACCAGGTGTAGGGAGTGAAGTCTCAGATAAGAGGACCTGTGTGAGCCTCACTACC  
CAGCGACTGCCGGTTAGCAG

>832

TGATCTTAACTCCTGACCCTGAGGCTTTGAGAATGTGGCTAACTTCGTCTGTCTTTTCC  
TTGCGTTACAGTTTTATTACCAAACGTGGCCTAAAAGTCTGTGCTGATCCACAAGCCAC  
ATGGGTGAGAGACGTGGTCAGG

>833

TACCAACCTTCTTTTTATCATTGTCTATTTGGTTGTTTTGCATACTGACAAGATTTTCTT  
TTCTTTTAGTTGGTGAATTGTCTTAGAATTGTTTGCAGATATCGTACCCAAAACCTGCGG  
AAAATTTTCGTGCACTGTG

>834

GTATCCATTAGTAAGCATTGCTAAAGGCATCCATGTCTCAGTCACTAATAGCCATTTTCC  
TTTTTTGTAGTTATTAAGAAATTTATGATTCAGGGTGGAGACTTCTCAAATCAGAATGGG  
ACAGGTGGAGAAAGTATTTA

>835

TTCAGACTAACACACAATTCAGAAAAGAACACATCTAACCTTGGTTTTCTTTAATTTT  
TATTTCTACAGCATGATCGGGAGGGTTTACTGAGCATGGCAAATGCAGGCCGCAACAC  
AAACGGTTCTCAGTTTTTTTATCA

>836

CATATGATAGAATCTAGCATTAAACCACATTACTTACTAAAATCCAACATATTTGATTTT  
TTTATACAGGTAGATAAAAATTTTATTAATAACAGAAGACTTAAAAAACATTGGAAATACT  
TTTTTCAAATCCCAGAACT

>837

TCTGGACATAGAGAAGAGTAATTCCTGTTTATGTGGTCTTTCATACTGCTTTTATTAATG  
CATTCTGCAGATACGTGGACAGTTCAAAGGCTGTTATTGAGACAGCAGATAGAGCCAA  
GCTGCAACCTATAGCTTTAAGC

>838

GCAATGAATTGAAATCTGGCATATAAGCTTAATACTTTGATATAAATACTAGCTTTATACT  
TTTTTGTAGGCTCTTGAAGTACCCATCAAATACCAAAGCATTGTACCGCAGAGCTCA  
AGGATGGCAAGGATTTAAAAG

>839

AATAGTTTGTAGTCACCATAATTTTTGGATATTTTGAGAAATAACTCACATTGCATATTT  
ATTTTACAGCTATCCAGGCAGAATTGCTGAAAGTCAAACAAAAGATAAAGGCACAGAA  
AGATAAAGAGAAGGCAGTATA

>840

CGCATACCGTGGACCGCACACAGGATCAGGGGAATAGGTTGCTCGCGGCTTCACTCT  
TTGTCTCCACAGCAGCCCTCCGGAGAGCTGTTTGAGATTGAAATAGACACCCTGGAAA  
CCACCTGCCATGTGCTGGACCCCA

>841

TGCCTGGAGGGAGCCTGCCGGGGTGCAGAGGGGAAGGGCAGCCATCCTCACGTGGG  
TTTTCTTCTCCAGGCTGTGCAAGGAGACTGTGATTTCCAGCTGTTGAAACTAGATGGCA

AGTTTTCCGTGGTATACGCAAAAT

>842

TAACGCAGCAGAGCTGGGGCCATGCCAGGGAGAATGGCTGCCACATCCTGGTTTCCT  
CTCTCCGAGCAGACTCAGCCGAGGACGTGCGCAAGGTGTGCCAAGACTGCCCCCTGC  
TGGCCCCGCTGAACGACACCAGGGT

>843

CGCTCTCCTTCTGCCCCTTTTCATTGTAAGTCATCTTTCCTCAAGAGCATTTCATGTA  
CTCTTCTCAGCCCCCTCCACCTTCTACCTATGTGGAGTTTACAGTGTGTGGCACTGACT  
GTGTTGCTAAAGAGGCCACAG

>844

CGCGTCAATGAAATTGGGGGGGATCCATTTTTGAAATTAGTTAAAATAAATCCTCTTCT  
CTGTGGGCAGCAATATGGCTTTTGTAAAGGCAACACTCAGTGAGAAGCTTGGTGGGGCA  
GAGGTTGCAGTGACCTGCACGG

>845

CCTGGCCCTGTGGGTTGTCTTGCCTGGGAGGAGGAAGCAAATAACTGAAGGAAATG  
GTCCTTTTTCCAGCCCGTGACCTCACAGCCCCAACAGAAAGGTGCCAATGAAGCAGTC  
CCCACCCCGTGGTGGACCCAGATG

>846

GAAGGCTGGAGTGCTGTGGCAGGGATGACGTCTCACTTCTGTTATGTCTCTGTGCCCT  
GTGCTCTCCAGGATGAGGGGCATGAAGCTGCTGGGGCGCTGCTGGCACTGGCGGC  
CCTACTGCAGGGGGCCGTGTCCCTG

>847

CCCTTTGTGGCGCTGTAGGGTCCCTGGGTGGCACCAGCCCTGCTCAGTACCACTGTGG  
CCCTGCCCCAGATCCTGAGCCGCTATGACATCGCCCTGGTCCAGGAGGTCAGAGACA  
GCCACCTGACTGCCGTGGGGAAGC

>848

CCTCGCTATCGGCAGCCAGAGGGTCCCCTATGGCCCCGCCACTGGGACCTTTTGTTT  
CTTCAATCCAGGGATGCACCAGACACCTATCACTACGTGGTGAGTGAGCCACTGGGAC  
GGAACAGCTATAAGGAGCGCTAC

>849

TGCCTCTGGGAAGCAGGAGTGGGGAGCTTCCAGCCTGGGGTCACCTCCTCCTGCC  
GGCCTCCCGCAGGCCTGACCAGGTGTCTGCGGTGGACAGCTACTACTACGATGATGG  
CTGCGAGCCCTGCGGGAACGACACC

>850

GTTCCAGCTGACATGGTGACTGAACCTGCCCCAGGGAGTGTGCCTCACACGACGTG  
GCTGTCTCCACAGAGGTCAGGGAGTTTGCCATTGTTCCCTGCATGCGGCCCGGGGG  
ACGCAGTAGCCGAGATCGACGCTCT

>851

GCCCTCCAGGGGCAGTGGGCACCAGCGCCTCCGCATGTCCAGGGCCACAGGCAG  
CGTTTCTGGTAGGACGTATGTTGATGGGCGACTTCAATGCGGGCTGCAGCTATGTGA  
GACCCTCCAGTGGTCATCCATCC

>852

GTTCTGCGGGTGCTGAGCCAGGCCATGTGTGAAAGGGGAACCTACTTTCTTTCCC  
AACACCCATCAGGATCGTGGTTGCAGGGATGCTGCTCCAAGGCGCCGTTGTTCCCGAC  
TCGGCTTTCCCTTAACTTCCAG

>853

CAGCCACATGAGGATGGGACACAGGAGCTCAGGTAGGCTCAGCCCAGACCCTGTGCC  
CACTTGCCTGCAGGCCCAAGCCATCAGTGACCACTATCCAGTGGAGGTGATGCTGAAG  
TGAGCAGCCCCCTCCCCACACCAGT

>854

CTCTGCCTTGTGAGAGCCCTTCTGCAGGCTTCCGCCTTCCCTTCCAACTCCTGGATT  
CCCGGATACAGATGAGAAAGGGCAACACCATGCAGCAGTTCTGCAGAAGGCGCTCG  
AGATCCTTCGGAAAGACTTCAGTG

>855

ATAGCACCTTGCCCGGATGTTGTCACTGGGGCAGCAGCGGGACATTGGGCTGTCACT  
TCTCCCCTGCAGGACCACTTCAACTTTGATGTTTCATGACGATGTGCGGTTGCTCAGT  
GACGCCACTGTGGAGAAGGATGA

>856

CTGGGCTATGGAGGAGAAGCCAAGGGAAGGGGAGGTCAGCAGGCGGCCCTGTGCCCT  
CTTCTCCCTTAGTCCCATGCAGGCAAGGTGGTGCTGAGGAGCTGGTACGAGAAGAAC  
AAGCACATCTTCCCGCCAGCCGCT

>857

GGGACGGCAGCCAGCCCCTGCTCACCCTCGCCTTCTTGTCTCCTCTGCCACCTTGT  
CCTCACACTAGATCCGCTGAGCATCCAGGAGCTGCGCGGCCCGGCTCCTCAGCTCCC  
TCAGTGTGCCCCGTGGTGTCACC

>858

AAGAGAGGGGAGAGTGGAGGTTGAGGGGTGGGGGAGAACTGCCTCTAGACTTCCCT  
TGTTTTCTTGAAGGTTAACATTAGGCTGGGAAGATGACAAAACCTGAAGAGCATCTGG  
AGGGAATTGCAATATCTCCACCA

>859

ATAAGAGGCCTAAGAAAGGTCTTGTGTGGAGGTTCTGAACTCAAGGTCTCTGTTGTC  
CTTTTTCTTAGAATATCAAAGATAAAGCTGTCATTGATGAAATATTCCAAGGCCTGGAT  
GCTAATCAAGATGAACAGGTCG

>860

GGGGGCGCAGGACCTGAGGAGCCGCGCCGGGAGGAGGGTCGGGCGGGTCTCAGCCC  
CTCCTCGCCCCAGGCTCCCACTCCATGAGGTATTCGACACCGCCATGTCCCGGCCCG  
GCCGCGGGGAGCCCCGCTTCATCTC

>861

AAATCCCCGCGGGTTGGTCGGGGCGGGGCGGGGCTCGGGGGACGGGGCTGACCGC  
GGGGCCGGGGCCAGGGTCTCACACCCTCCAGAGCATGTACGGCTGCGACGTGGGGCC  
GGACGGGCGCCTCCTCCGCGGGCATAA

>862

TCACATGGGTGGTCTAGGGTGTGCCATGAGAGATGCAAAGCGCCTGAATTTTCTGAC  
TCTTCCCATCAGACCCCCAAAGACACACGTGACCCACCACCCCATCTCTGACCATGA  
GGCCACCCTGAGGTGCTGGGCCCT

>863

TATCTTCTCAGGGAAAGCAGGAGCCCTCAGCAGGGTCAGGGCCCCCTCATCTTCCC  
CTCCTTTCCAGAGCCGTCTCCAGTCCACCGTCCCCATCGTGGGCATTGTTGCTGGC  
CTGGCTGTCTAGCAGTTGTGGT

>864

GTGGGCTGTTTAGAGTGTCACTTACCATGACTAACCAGAATTTGTTTCATGACTGTT  
GTTTTCTGTAGCCTGAGACAGCTGTCTTGTGAGGGACTGAGATGCAGGATTTCTTCAC

GCCTCCCCTTTGTGACTTCAAGA

>865

GAGGGCGCAGGACCCGGGGAGCCGCGCAGGGAGGTGGGTCGGGCGGGTCTCAGCCC  
CTCCTCGCCCCAGGCTCCCACTCCATGAGGTATTCGACACCGCGTGTCCCGGCCCG  
GCCGCGGAGAGCCCCGCTTCATCTC

>866

AAAATCCCCGCGGGTTGGTCGGGGCGGGGCGGGGCTCGGGGACTGGGCTGACCGCG  
GGGGCGGGCCAGGGTCTCACACCCTCCAGAGGATGTATGGCTGCGACCTGGGGCCC  
GACGGGCGCCTCCTCCGCGGGTATGA

>867

TCACATGGGCGCTGCTGGAGTGTCCCAAGAGAGATGCAAAGTGTCTGAATTTCTGAC  
TCTTCCCGTCAGAACCCCAAAGACACACGTGACCCACCACCCCTCTCTGACCATGA  
GGCCACCCTGAGGTGCTGGGCCCT

>868

TGGAGCCCTTCAGCCGGTCAAGGCTGAGGCTTGGGGGTCAAGGCCCTCACCTTCTC  
CTCCTTTCCAGAGCCATCTTCCAGCCCACCATCCCATCATGGGCATCGTTGCTGGC  
CTGGCTGTCCTGGTTGTCCTAGC

>869

GTGGGCCGTTCAAGTGTCACTTACCATGACTGACCTGAATTTGTTTCATGACTATT  
GTGTTCTGTAGCCTGAGACAGCTGCCTGTGTGGGACTGAGATGCAGGATTTCTTACA  
CCTCTCCTTTGTGACTTCAAGAG

>870

TGACCCCTGTGAGTCTGGGCCAATCCCTGAGGACTGCTAAGCTGCGTCCTATGCCCT  
ATGCCTGGTAGATTCTGAGCAAGCTGGTGAACAGCCTGTACCCTGATGGCTCCAAGCC  
GGTGAAGGTGCCGAGAACCAC

>871

AGAGGGATCAGAAAACGGGTGGAAAACACACAGTTCTACCAAGTCTTTATCCTGCTTC  
CTCCTTTCTAGGAAAGCGCAGGAGCATAAGAGGGAATTCACAGAGAGCCAGCTGCA  
GGAGGGAAAGCATGTCATTGGCCTT

>872

CCCCTGTAAGGGAAGCTCGAGAGAGAGTCTGCTGTTTCAGCCATCTGACTGCTTCTAAA  
TCTGCTTTTCAGGCCTAAAGGGGAGTGGCCCCAGTGGCGGTAGCGGCGGTGGTGCCAA  
TGGTACCTCTTTCAGCTACACATT

>873

GACGGCCTCTGGGCAAGAGCTGAGCCTCTTGAGCCAGCTTCCATCTAATGCTGTCTTT  
TGCTTTTCAAGGCTCTGTGTGGCTGCACAGTGAACGTCCCCACTCTGGACGGCAGGAC  
GATACCCGTCGTATTCAAAGATG

>874

TTGGCTTCGGTTTTAGCATTCTGCTGTCATCACCTCCATCCCTCCGTCTTGCTCCTGTTT  
CTCTCTGCAGAGTGGCAGCCAGCGGTGCAGATTCTCTGTACTCCTTGATATTCTGCT  
CAGCGTGCTGGGAAACACGCT

>875

TTCAAGCTAATGTGCAAATAAACTTTGGATTTCAAGTCAACATAACCGGCTTCTTTGT  
TCCTTTCCAGGCACCTCTGTGAGTGTATCTACCTTTAATCTGGTAGCCATATCTCTAGA  
GAGATATGGTGCGATTTGCAA

>876

ATTCATTCTCCCATTTGAGTTTGAAGGTCTAAAGTTGCTGGTTATTGGATTTCTTTTG  
ATTTATTAGGCACACATTCTGTTACTCATCTCTTTCTTATTCTGGAATTGTGATGAT  
GGTGGCATATGGATTAATC

>877

GTGGGGGCTCCATGCCTTCTACCGGGCATGACCCATCCCCAGCAATGAGTGATGTCTCT  
TGCCACCCAGAAAGGAAACCTAGCACCACCAGCAGCGGCAAATATGAGGACAGCGA  
TGGGTGTTACCTGCAAAAGACCAG

>878

CCCTGTTCTTCCCAAGCCTCTGCCTTGGAGCTATGGATACTATAACTGAAGCTT  
CTTCTTTAGGTACCCACTGATGGTAATGCTGGCCTGCTGGCTGAACCCAGATTGCCA  
TGTTCTGTGGCAGACTGAACA

>879

CTTGTTAGATGCTTGAAATGCCAGCCCCTGCCTCAAGTAACAATTGATTCTTTTTGTG  
GCTCTCCAGGTCTACCCTGAACTGCAGATCACCATGTGGTAGAAGCCAACCAACCA  
GTGACCATCCAGAACTGGTGCA

>880

TTGATGTCTTCTGCGGTAAGAACACTGTGATACAGATGGAATGACGGGAAGTGGTTTT  
CCTTTCTTTAGTTGGTGAGTTTGTAAAGTATGCCCTTCTGTTCTGACAAGTGCAA  
TTCTTACACCAGGAGAGGATGGA

>881

TTATGTGGAGTTTTCTTACAATGAAACACATCTACTCTACCACTCACTGTTTTCTCCTTA  
CACTTTGTAGACATGCAGTGAGAAGAGTACCAACTTGCATGACTACGGCATGTTGCTG  
CCCTGCGGAATTGACAAGTTCC

>882

ACGACTTTTCTTTTCCCTGAAATGTGTTAATTGACTTTTTCTGTTATTTGTGTTTG  
CCTTACAGTGAAGACAAAGTAGTAGAAGTAGCAGAGGAGGAAGAAGTGGCTGAGGT  
GGAAGAAGAAGAAGCCGATGAT

>883

CGTGATACATGAACAGAGAGACAGTGCCTTTTCATGCTAAATGTGGTTCCCCACATCT  
CCTCTGATTAGAGGTGTGCTCTGAACAAGCCGAGACGGGGCCGTGCCGAGCAATGATC  
TCCCGCTGGTACTTTGATGTGAC

>884

ATTAAACGAGTGGATTATTCTGTTGTTGTTGGCTTTTTTTTCTCAAACCTCCTTCTTCT  
ACTTTATAGTTCCTACAACAGCAGCCAGTACCCCTGATGCCGTTGACAAGTATCTCGAG  
ACACCTGGGGATGAGAATGA

>885

CCATCCTATTAAGTCTGTATTCAAAGGATGAACTGATGATTTTAAATTCAAATGTTTCCTT  
AATTTATAGGTCATGAGAGAATGGGAAGAGGCAGAACGTCAAGCAAAGAAGTGCCTA  
AAGCTGATAAGAAGGCAGTTA

>886

TAGAAGACTTGAAATTGCTGCTTCATCCTACTTATTCAGTCCCCATGGACATATGTGTTT  
ATGATGGCAGCATTTCCAGGAGAAAGTGAATCTTTGGAACAGGAAGCAGCCAACGA  
GAGACAGCAGCTGGTGGAGACAC

>887

ACCATCGCCAATGGAAGAAGCAGTGTGTTTGCACAACTTGAAAAAGAGTTTTTCATT  
TTCTCCACAGCCTCGTCAGTGTTCATATGCTAAAGAAGTATGTCCGCGCAGAACA

GAAGGACAGACAGCACACCCTAA

>888

AAAAAGAAAGAAAAAGAACCATTCTACCCCCAGACATTGTTGACCTGGAGTTGTCAT  
CCTTTGATGCAGGTTATGACACACCTCCGTGTGATTTATGAGCGCATGAATCAGTCTCT  
CTCCCTGCTCTACAACGTGCCTG

>889

TGGTGGCTGCTGCTGCTGCTGCTGTTGTGATTGTTGTTACTCACCAAAGAGATGGTTTT  
GTTTGGTTTAGATGAGCTGCTCAGAAAAGAGCAAACTATTAGATGACGTCTTGCC  
AACATGATTAGTGAACCAAGGAT

>890

CTTACAGTGTATTATTTATGAGTAAAATAATTGGTTGCCTGCATACTTAATTATGAT  
GTAATACAGTTCTGGGTTGACAAATATCAAGACGGAGGAGATCTCTGAAGTGAAGAT  
GGATGCAGAATCCGACATGA

>891

ATTGCGTTTATAAATTGTAAATTATATTGCATTTAGAAATTAATTTCTTTTTCTAATTTG  
TTTTCAAGGTGTTCTTTGCAGAAGATGTGGGTTCAAACAAAGGTGCAATCATTGGACT  
CATGGTGGGCGGTGTTGTCA

>892

ACTGCTTCTCCATGTTACCCCTAAAAGATTGATTTTTATTTTTACTCAGCTCTCCTCTT  
GTTTTTCAGGTTGACGCCGCTGTCACCCAGAGGAGCGCCACCTGTCCAAGATGCAGC  
AGAACGGCTACGAAAATCCAA

>893

AGGAGAGACCGCTGTTCTGCGGCCATTCTGGGTTCTCATCCTAAGGCTGCTTTCTA  
TTCCATAACAGTGGTTGAAGTTGACATCTGACGACGTGAAGGAGCAGATTTACAACT  
GGCCAAGAAGGGCCTTACTCCTT

>894

GAGCCTTGACATCATCACATTCTCCAGTTTGTGTTTCGTGTTGAAAGTTAAAACGTGAT  
TCCTTTTAGGTTGAATCCTGAGAGATTACATGGTGTGCACAAGTACGTTTTGTGA  
CAGGCAATAAAATTTAAGAAT

>895

CTTATAATGTTTGATAATGTTAGGTCATTTGGGTGGTTTTCTTGAATTGCACCAAATTT  
TATTTTTAGGATAAGGATGCTAAATCCGTCTGATTCTAATAGAGACCGGATTCACCGT  
TTGGCTCGATATTATAAGA

>896

ATTCTGTTAATGAATGTGGAGGGACCAGTATTAATCCTGATTTTCTTTCTTTCCCCTTTG  
CTTTCCAGTGAATCATCTACAGCCTCTGCCCTGGTCGCATAAATTTGTCTGTGACTCA  
AGCAATAAAATGATTGTTT

>897

CCGCGATGTCTGCAGCAGGGGTTTCCCTTCGCGTCCCCTCTTCTCAACTACCTGTTTT  
TTCTTGCCAGACCGGGGCTTTGAGCTCACATTCAAGACCGCTGATGACCCAGCCTG  
TCTCTATAAAGTATGGGGAATT

>898

CCTCCCTGCCAGTGTGAGAGGAGCAGGGAGAGGAGACCTCTGGGTCACTGTGTCTGG  
TGCTGCTTTAGATTTTGGAGGCAACATCAACGTGGAGACCATCAGTGCCTTTATTGA  
CGGTGGAGGCAGTGTGCTGGTAGC

>899

GGAAGCCAAGGACACTTGGCCCAAGGCCCCCTGTAAGGGCTCAGCTAGGTGTCTCTT  
CGGTCTGTGCAGGTGACCCCTTCGAGAGCTGGGCAGTGAGTGCGGGATTGAGTTGA  
CGAGGAGAAAACGGCTGTCATTGA

>900

GTGTGAGGAGGTTCTCCCTGGCTTGGGGAACCTTTTCCTGACCACCCACCTTTCCATCT  
ACTCTTTCAGCATAACGCTCATCGTGGCTGACACTGAGAACCTGCTGAAGGCCCAAC  
CATCGTTGGGAAATCATCTCTAA

>901

CTCTCGGGGATCCCATGTCCTTGGGCTCAGTTCCTGGGGCCAGTGTGGGCTGCTCTC  
GTCCTGTGCAGGATGGTGGCCGATCCTGATAACCCTTTGGTGTGGACATCCTGACGG  
GCTCTTCCACCTTACTCCTTC

>902

CTTGTTCCGGGAGGCGTGCAGCTTTCCCTTACTTGGAAGTCTTGGGTACAGCTTCGT  
TTTGTTCAGTATCCACATGCGGTGGGGAAGAACCCCTCCTCATTGCTGGGCTCCAG  
GCCAGGAACAATGCCCGCTCA

>903

GTCCCTGCCATCAGGCAACACTGGAAAGGTGGCTCTGGTGGCCAAGCTGCTCCTGTT  
TCCCTCTGCAGGTATCCAGACAGGCAACTATGAACTAGCTGTGGCCCTCTCCCGCT  
GGGTGTTCAAGGAGGAGGGTGTC

>904

AGCTCTGCCTGCAGGTGGTGGAAAGCCTCCAGTCATGGCCACCCCTGGCTAACCTGCC  
CTTTTATCTCAGGAGTATAGCATCGTGATCCAGCAGCTCTCAAATGCCAAATGGGTCCC  
CTTTGATGGCGATGACATTCAGC

>905

TGCTCTCGAGGCCCAACCAGGAAAAGCTCTGGGAAACCCCTCCCGTTATTCTTGTTG  
GTTCTTCCGCAGGTGGCAAATACAGTGTTCAAGTTGCCCGACGTGTATGGTGTA  
TTCCAGTTTAAAGTGATTACAA

>906

GTTTTACAGTAGCATGTGCCCTGCCTGGGTTCTGCAGTGGGCAGGTCTGCCACCTCTG  
TCCTCCTGCAGGTATCCGTGCGGCCACTCCAGCACACGCAGTATGAGCGCTTCATCCC  
TCGGCCTACCCCTACTACGCCA

>907

GAAACCATTACCCCTTATATTTAACTGTGAAATATCTGATTTAAAATTATTTACTTCTTTG  
TTTCCACAGCCTGGTGAGAGTCAAAGAGGCCCCAGGGGACCATATCCACCTGGACCAC  
TGGCTCCTCCTCCACCAC

>908

GCCGCCCCGGGCGCCCTGGAGGGGTCTCCGCCCGGAGCCTGGCGCTGCCTCGTGACCT  
GCATCATCTTCAAGTCCAGGTCTCCCTCCACTGCTGTAGTAACCCGGGTCCGGGGCCT  
CGGTGGTGCTCCTGATGCCCTCA

>909

AGCGCTGCCGGGTTCTTGAGTCCTGTGGGATGAGTCAGGGTCTGAATTGGGCTGCA  
CCCCCTGGACAGGATGATCGGCTGAATGTAACAGAGGAACTAACGTCCAACGACAAG  
ACGAGGATTCTCAACGTCCAGTCCA

>910

AGGGTAGCTGCTAAGGCCAGGAGGTAGGCAGGTGGGTCCGGCCAGCCGAGACGCTG  
ACACTCGCTGCAGCTTTCAGTTCCTGGAGTTCGCTGAGGAGCAGCTGCGAGCCGA

CCATGTCTTCATTTGCTTCCACAAG

>911

CCCTGCGGGGGTGGGGGGTGCGGGCGGGGGTCTGGTCGGCAGGGGTTCTGACGGC  
TTCTCCCCCGCAGCCGCTTGCTCCGAACCTTCAGCTTTTTGGGCTTTGAGATTGTGAG  
ACCGGGGCATCCCCTTGTCGCCAA

>912

TTGCACAGCCTGATGGTGGCCCGCAGAACCAGGCCTGGAGCTCCCACTGCGATCTTTG  
CTTTCTTTTTAGCGTCAATCCAGAGTTCAGCCCAGAGGCCCTGGACAACCTGCTGTCCG  
TTTTACAACCACACGATCTGTGCA

>913

GTCACCCAAAAATACTTTTCGTATTCTACACTGATGTGACAGTAATAATGGTTTTTCTT  
CAACTGACAGATGGGCTTTTTTAAACGGGTCCGGCCACCTCAAGAAGAACAAGAAAG  
GGAGCAGCTTCAACCTCGTGAAA

>914

GGCTCTGTGAAGGGTGGGCCACAACACAGCTGTTCCAGCACAACTCAGTGTTC  
ACCTTCTTTTTCAGTATTAGGATATCCAAGCCGCTAGCCCGAAGCCCATGCCTGTCATCC  
GAGTGGTGGAAACCTGAGCTGCC

>915

CTGTAGTTCCAAGTTAAAATTCTACACTCCTGATATTTATATATTGCTACTTTGTCATTTT  
CTACCATAGGTCTGAAGATCAATTTACAAGACCTCCAAGGAGCTTGCCACCAAGAAGACA  
GCCTGAATAGCCCCGACAGTTC

>916

CACTGATTTTAAAACTGTACAGTGATCAAACCTGGCCGTTTTATCACAAAACAATTTT  
TATATTTTCAGTACGTGATGGTTCAAGACATGCTCTCTCCATCCCCATGGAACGACCTG  
AAGCTATAAACATCATTGAAA

>917

AAGCCTCTGAGGGATTGAGGGGCCCTGGCAGGACCCTGACCTCCGCCCTGCCCCCG  
CTCCCGCTCCAGGTTCCCCCAGCAAGCGGGAGCCCGTGGTGGCGGTGGCTGCCCCG  
GCCTCCTCGGAGAGCAGCAGCACCAA

>918

CCCCCTGACACCCTGCCTCCAGCCTGCCCTTTCTCTAAGGCCCTCTGTTCTCTCC  
TCCCTTCTAGAACATCATCCGCAAGGTGAGCGGCCAGAAGTTCGTCTACAAGTTTGT  
GTCCTACCCTGAGGTCGCAGGGT

>919

GGTGGCCACAGGAGAATCCTGTGGTCCCAACAATCCTTACACACCCTCTTTGTGCCTG  
CTCCTTACCAGGTCATCCTGACCCCGCCCGAGGCCCAAACCTGAAATCGGAAGAGC  
TTAATGTGGAGCCGGGTTTGGGCC

>920

CCCGTTTTGACAGGGTGAGAGACCCAAGAATGGCCCCATCTGTGACCTCTCCCTCT  
TTTTGCCCCAGTTTCCATCCAGTGGCAGCGCCAGGTGCACATCCCTTCTATCAGCGT  
GGATGGCCTCTCGACCCCGTGG

>921

CTAGGTAGGGGTGGATGTGCCACCCAACACCCAACCACTGACCCATATTCCTCCTTCCC  
TTACTTTCCAGGCCATCCCGTGGCGGTTGCCAGCAAGAAGCGAAAGAAGCCTTCAAG  
GCCAGCCAAGACTCGGAAACGTC

>922



GTGAGCCAGATGGGTGAGGGTTGTGATTGGGGGTGCTCTTGAGCCCCACACCTGCCT  
TTCCCATCCCAGGTGCTGTGAGAACTGTGGAATCAGCTTCTCAGGGGATGGCACCCAA  
AGGCAGCGGCTCAAAACGTTGTGC

>923

GGTCAGTAGACATGGGAGGACCAATGCTTCTGGAGCAGGCCCGTGATCTCGTCCCTAC  
CATTCTGGCAGCGTGTGGGCTGTGGGGAGTGTGCAGCCTGCCAGGTAACAGAAGAC  
TGTGGGGCCTGCTCCACCTGCCTCC

>924

TCGGCCCTGGCCCCATGGGCTTGGCCCCATGCTTCATGCCTCTGCTCCACCTGCC  
CCCGCCAACAGAGCCGAGGGTGTGGAGTATGCCGGGGCTGTCAGACCCAAGAGGATT  
GTGGCCATTGCCCCATCTGCCTTC

>925

TAGGGTGTGGGGAGTTTCTGTGTCTGCCTGGTGCCACCAAGCTGAAACCACCTTTCT  
GATCTTTCCAGGGTAAACATGCCCGCCGCAAGGGAGGCTGTGACTCCAAGATGGCTG  
CCAGGCGGGCGCCCCGGAGCCAGC

>926

ACTGGAATAGGCGTTGAGGATGGCCTCTCCTAGTCCTAGTTGACAGCACCACCCATTCC  
CCCCACCCAGCAGCCCTACACGAACCGCCGGCAGAACCGCAAGTGCGGGGCCTGTG  
CAGCCTGCCTACGGCGGATGGACT

>927

TGGAGCCGGGCAGGGTGGATGTGATTGGTCAGGACACCAGGTAGCCATAGCACCTAT  
CTTTCCCATAGAAGCGGCTGCTGCCAGTGTCTGGTCAGAGTCTGAGGATGGGGCAG  
GATCGCCCGCACCTTACCGTCGTC

>928

CCTTCCAGCCTCACCCAGCTGCATGCCAGGGAGCTGAGACCAAGTCTGCTGCAATCC  
TCCCTCACGCAGGAGGCCAGTGCTCTGGCCTGAGTTGGGTTGTGGCCTTACCCAGG  
TGAAGCAAGAGAAGGCGGATACCC

>929

TTGGCTGATAGAGACTTTCCTCAGGTGAACTTGCCCTTCTAATGGTTGCCTGTTTCCT  
ACTTCTCCAGGCAGTAGACCCAGGCCTGCCTTCTGTGAAGCAAGAGCCACCTGACCC  
AGAGGAGGACAAGGAGGAGAACA

>930

GGTTTTGTAATGCTCCATTGCGCACATAGCAAACCTCATTCAACATACAGACCTGCTCC  
CTTTCCCTAGGTCCAAAGACCTTAAAAAACCTGGAGCTAGAAAGCAGTAGACTGGAG  
GCTTCTACAGACTGTAGGATTCA

>931

GGTGCGGGACAAGGACTTCTGCCCTGCCTCACCTCCCTTCTCTTTGATGCCCTCC  
TCCACTGCAGATCCATTACACCGGCTGCTCTATGAATCCTGCCCGCTCCCTGGCTCCA  
GCTGTCGTCACTGGCAAATTTG

>932

GCCGGGGCCTGAGGGCTCCGCGTGCCGGTGCGGGGCGGGTGCCAAGCCGCCCTCTC  
CGCTGCCCCCAGGTCTTCTGGATCGGACCCCTGGTGGGCGCCATCTGGGCTCCCTC  
CTTACAACACTACGTGCTGTTTCCGC

>933

CCTACTCCAGGAATCCTTAAGGCAGATATCATTTACCTACACTGAGTTCTTTGTTGCCAC  
CCTGTAACAGGCACAATGAGTTTGACTTCATCTCAGGAACTCGAATGAGGAAGCTCGC

CCGGAAGGAGAGAATCCCCCA

>934

GGTGCCCATCTGAGTCCCTGGGGCAGGGGCGCCCTCGGGCTTTGACGACGCCCCCTC  
CCGCTGGGCCAGGTCGTCCATCCGCAACGTGCACAGCATCCACCAGCGGTCGCGGAA  
GCGCCTCAGCCAGGACGCCTATCGC

>935

CAGAGAGCGCTGTGGGCGGGGCCAGTGTGCGGGGCGGGGCGTCTGACTCGGCCCCGC  
TCTCTGCCCCGAGAGGAGCGGCAGACGCAGCGCTCTAAACCGCAGCCGGCGGTG  
CCCCCGCGGCCGAGCGCCGACCTCAT

>936

TTTCCAATCAGAACAGCAAATTCTAATTCATTTTGGGTTTTCAATTCTGATGCACTAT  
GTTTGTTTAGCTCTTAGCCCCACGACGTAAAGCCTTTAAGAAATGGACACCTCCTCG  
GTCACCTTTAATCTCGTTCA

>937

GAGAACTACTTGAACGTGAAATCAGCCACCTGGAGTCTTGAATCATTCACTTACTT  
TACTTCCCAGGCAAATGGCAATACCTGTGCTTTGGAAGTTTCTGGAGAAGTATCCTT  
CAGCTGAGGTAGCAAGAACCGC

>938

CCATCACACACATTTGGGAGGGTGTCTTTAGAAGCTGACCTGATAATGTGGGATGTT  
GTATTCTTCAGATGAATACCTGACAAAGCAGTGAAGTATCCAATTGAGCTTCATGGGA  
TTGGTAAATATGGCAACGACTC

>939

AATTTAAAAAATGTATTTCTGACTAAGTTACATTAAGGTCTCTGCCTCTGTATCTTATGT  
TTCTTCCAGGTGCACCCTGAAGACCACAAATTAATAAATATCATGACTGGCTTTGGGA  
AAATCATGAAAAATTAAGTC

>940

GATGGGTGTAGACCAGCGCAGGGGGTAGAAACGATTTTGTAGAAACGAAAGCTTTTAT  
TACCTTTACAGGTGGGTTCTACCCTGAGCCCTGTTCCATGGCTCCCTTCAGAGGAATC  
CACTCTCTGGAGCAGTTTGTCTC

>941

ATCTTGTGTTACTGGGACTCTAATGTTGGGCAAATGAAGGAGACGAATGTCTGTTC  
TCTGGTTGCAGGGTGCCTGCTGACAGGAACTAGCAGTGTCTTCTACGGGGCCCCC  
CAGGCTGTGGGAAGACCACAGTA

>942

CCTCCCCTGATTCTCCTGCCCTTGTATGCTTTCCCTTGCTCACAGACCCATTGGGATC  
CCCTCCCAGGTGCCCTGCTCCAGCCTCTGTGCAGAAAGTAGTGGGGCTGTGGAGACA  
AACTGCAGGCCATCTTCTCCC

>943

TTGGGACAAGGCAGTCCACAGGAGCTGCCAGCCATGTTCTACCCTCAGTGCCCACTC  
CTCTGTCTGCAGCTGCCCTCCCCTCATGGTTGTGGCCACCACAAGCCGGGCCAGGAC  
CTGCCTGCTGATGTGCAGACAGCA

>944

CTGGGGACGGTCCCTGAAGGTTCTGCCTACTGTGCCCTGCTCATGTGTCCTTCTCTG  
TGGTTCCCTAGGGCTTTGTGGTAGGGGATCTCTATGCCCTTCTGACCCACAGCAGCCGG  
GCAGCCTGCACCAGGATCAAGA

>945

GGGTGGTGAGGAAGGGAGAAGGGAATGGGACGCTGATGGTGAGGAGGCTTCCCTGTG  
TTCCTCTTTGCAGTTTGGCAGGTGGCTTGACTIONGAGGAGGATGAGGGGGAGCTGTGTGC  
TGCCGGCTTTCCTCTCCTGGCTGAG

>946

CCAAGTCCTTGAGGTGGGACAGGAGCCCCTCCAAGAGCATATCCAACCACGCACTT  
TCCATCTCCTAGATCCCCTCAGTGTCTTGGCATGATGTGGGTGGGCTGCAGGAGGTGA  
AGAAGGAGATCCTGGAGACCATT

>947

CTGCTCTCACCTAACTTCAACCCCCACAAGCCGAGCTTTGCCCTCCTGTGGGCCCTC  
TCTCTCTCAGTGTGGCCAGGGCCAGGGCTGCAGCTCCATGCATTATCTTCTTTGATG  
AACTGGACTCTTTGGCCCAAG

>948

AGGTACCACAGGCAGGGGCAGAGTCTAAGGGGGACACCAAGGACTCTTGCCCTTGCT  
CCCTTCTCTCAGGGTGGTGTCTCAGCTCCTTGCCGAGCTAGATGGGCTGCACAGCAC  
TCAGGATGTGTTTGTGATTGGAGCC

>949

CTCATTTTGTGCCTCCTTACCCCTCATGGCTGGGCTCCCTGAACTTATACCTGCCTAT  
CTCCCTAAAGATTTGACAAGCTGGTGTGGTGGGGCAAATGAGGACCGGGCTCCCA  
GCTACGCGTTCTAAGTGCCATC

>950

GAGCTGGTCAGCACTGGCTTTGAGGGAGGAGGTGATGCCAACTCTGTTTCTCCTGT  
ATCCACAACAGATTCAAGCTAGAGCCATCTGTGAGCCTGGTAAACGTGCTAGATTGCT  
GCCCTCCCCAGCTGACGGGCGCG

>951

GGAAGCCACCTTCGCAGGGCTCTCCCTGCCTGGGCATAGACCACAGCCTCCCCACCT  
TGTCATCTCAGGGCTGGAGCCAGGTAGCTCAGCACTGATGCTCACCATGGAGGACTT  
GCTGCAGGCTGCCGCCCCGGCTGCA

>952

GTTCTGAAGGGAGAGAAGTCATTTGAGTTACCCTCGTATCCTTTCTTTGTATCTTCGC  
CTTGATCAGGGGCCATGGAACGTATATGGGAGAAGAGAAGCTCATTGCATCTGTTGCT  
GGCTCTGTGGAGAGAGTAAAC

>953

ATTCTGTAGTCTCCTTTTCATTCATCCCGCAATCTTGCAGTGACCTAGCTTCGTGATATA  
TTTCTTTAGCTAGGTGAGGGGGTTTTGGTCCAGGTTTTCCCTCCCTGGTGAAACGGCA  
GAAGACCCACTTTCATGATT

>954

AATTTCTGTGGCTGGTCACGTATTTTGGTCTGTTTGTATTTCCCTTCCCTCTCTGTGT  
CTCCTTATAGCCTGTCTCTTGTCTGATCGAGAGGTGATATCCCGGCTTCGAACTGCAT  
CATCTCGCTGGTAACTCAGA

>955

GTTTGGATTGGCTTGGTGGTCTGTTTATGGTTGGTTTCTTTTCTGAACAAATGCCTTTTC  
CCTTTTTCAGATCAAAGACATCTTAAAGCCAGAAATAATGGAGGAGATTGTGATGGAA  
ACACGCCAGAGGCTTTTGGAAAC

>956

AATAAACTAATTTTTCTCCCAATTTCTCTCCTTTTTCTTTTTCTGTTCCCCCTTT  
CTCTCCAGAAGCCCTTCAGCGGCCAGTAGCATCTGACTTTGAGCCTCAGGGTCTGAG

TGAAGCCGCTCGTTGGAACTC

>957

AAGAATCAATGAAAAAGAACGAAGCTGGTTTCCAAAGCTGATATGTCTGATTTGGTTC  
CTTTCTTCTCAGGTGAAAAGCTCCGGGTCTTAGGCTATAATCACAATGGGAATGGTGT  
GAAGCCCAAACCAAAAATGGCCA

>958

AACTGGCTCACGTGAGCTCTTTGAGCTTGCCTGTCTCTGTGGGCTGAAGGCTGTTCCC  
TGTTTCCTTCAGCTCTACGTCTCCTCCGAGAGCCGCTTCAACACCCTGGCCGAGTTGGT  
TCATCATCATTCAACGGTGGCCG

>959

CTAGTCAAGTACTTACCCACTGAAAAGCACTTCTGAAATAATTTACCTTCGTTTTTTT  
CCTTCTGCAGGAGGACACCATGGAGGTGGAAGAGTCTTGAAAGAAGCTGCAGTCAT  
GAAAGAGATCAAACACCCTAACC

>960

TTCTTTAGACAGTTGTTTGTTCAGTTGGGAGCGGAGCCACGTGTTGAAGTCTCGTTGT  
CTTGTTGGCAGGGGTCTGCACCCGGGAGCCCCGTTCTATATCATCACTGAGTTCATGA  
CCTACGGGAACCTCCTGGACTA

>961

CAGCAGTGGTGGATTTGTGAAGTGAAGGTTGGCCAGGAGCTCTCATGGGTGAACATT  
TTCCTTTCTTAGAGATCTTGCTGCCCGAAACTGCCTGGTAGGGGAGAACCACTTGGTG  
AAGGTAGCTGATTTTGGCCTGAGC

>962

CTGATTTTAAATGTAGTGTAGTGAATGCTACACATCTTGAACAGCCTTTCTTTTCGGT  
TTTCTTTTCAGCATTGGAGTATTGCTTTGGGAAATTGCTACCTATGGCATGTCCCTTAC  
CCGGGAATTGACCTGTCCCA

>963

TTGAGAACTGCTAGCCCCGATTGCTAGCCAGATCTCATGGATGATCTGACTTGGGTTT  
CATCTGTCCAGTTGGCAGTGAATCCCTCTGACCGCCCTCCTTTGCTGAAATCCACC  
AAGCCTTTGAAACAATGTTCCA

>964

CCACCACCAAGCCAACACCAGTACTGATGGCTGCTGGATTTTTGTTTCTGTCCCTGT  
ATGATTCTTAGAAGTGGAAAAGGAGCTGGGGAAACAAGGCGTCCGTGGGGCTGTGAG  
TACCTTGCTGCAGGCCCCAGAGCT

>965

GTTCAAGCGATTCTCCTCTGTCAGCCTCTAGAGTTGTCTGGAGTTGTCAGCTCTTCCCC  
TTGCGTTTCAGATCCTCTGGACCATGAGCCTGCCGTGTCTCATTGCTCCCTCGAAAAG  
AGCGAGGTCCCCGGAGGGCGG

>966

GATGAGATTGTGTTAAGGATGTTTTTGTATGCAGGTTTTGCCATTTCTTCTTTTCTG  
TCCATTTAGGGGAATGACTCTGACTTTGAGACGGTGTACCAGCAGTGTGTCAGGTGCT  
GCAGAGCGTCTTGGAAGG

>967

GGTTGATTAGAGGAAGGTCCAGGAAATTCATCCTCTACCATTTCTCCCACCCTCTGCC  
CCACACCTAAGAAATGGAGTGGCCAAAGTCAACATCTTCTTCAAGGAGCTGAACTACA  
AAACCAATTCTGAGTCTCCCTCT

>968

AAGGGGGCTCCTCTGCCAGAGTCCATCCAGAACCCTCTGTCCCATCGTCAATGTACCTC  
TCCTCTCACAGATGGTACCCTCCTGTCCAACCTGGGCAGCCAGTGGAGCCTGTGGTT  
CGGCTCCTCGGTGTTGTCTGTGG

>969

ATGATTCTCATGTCTCTGAGGCTTGAGCCCCTTAGTCCAGCCTTTGATCATTTCACCT  
TGTTCCCTTAGGATGGAGTGATGGTGCTCAGCGCAACCCACCGGTACAAGAAGAAGTAC  
GTCACCACCTTGTTATACAAGC

>970

CGGGGTTAGGGTGGGGTGGCTGCAGGTCTGGGAGGCAGGACAGAGGCGTGACCACCT  
CCTTCCCCACCAGTATCTTCTGACCGCTGCCCTGGGGCTGCCTGAGGCCCTGATCCCG  
GTGCAGCTGCTATGGGTGAACCTG

>971

TGAGGCCCTCAACCCTCGATGCCCCCTATCTCCCCAGCCCTGACCCCGACTCCCCTCT  
CTCCACCACAGGCTATGTGGGTGCAGCCACCGTGGGAGCAGCTGCCTGGTGGTTCCCTG  
TACGCTGAGGATGGGCCTCATGT

>972

ATGCAGGAGGGTACCAGGAGGGTGGCATGGAGGTGGCCCTGGACCTCAGTCTCCCGT  
ACCTTCCCTGCAGACTCACTTCATGCAGTGCACCGAGGACAACACCCACTTTGAGGGC  
ATAGACTGTGAGGTCTTCGAGGCC

>973

CCACATCCTCCACTGTGCCGCCACCTCCTTCTCCTCACTGTTCCCTTCTCCCTCCCCTTC  
CCCTCTGCAGCCTGTCCGAGAACCAGTCCCTGCTGCGGATGCCACCCTGGGTGAACAT  
CTGGCTGCTGGGCTCCATCTGC

>974

GGGCTGGGCAGTGTGGTCTCTGGCTCCCTCCCCACCCCTCCTGAGAGGGCGCTTGT  
CCCCTGCCCCAGATGATCTTCAAGCTCCGGGCCCTGGACCTACCCAGTGGCTCATGG  
TCCTCAAGATCTCACTGCCAGTCA

>975

CATTATACAGTGTTTTTGAATACAGTATTTTGATCTGCCTTTAACAAATGTTTTCTCA  
TTATTTAGTTGCCAAAGCTGTTTGATGGATGCTACTTCTATTTGTGGGAACCTTCAA  
CACCATCAAAGGACAACC

>976

AGAAAACCTGGGGGAGGCAGGACTAGAGAGCAGGGCTGGACACAGGTCCCTCACAG  
TCACTGTTCCCCAGACACCGCTCCACCTGGCTGTGATACCACATTACCGTCTGTGGTC  
CGGCTCCTGGTGACAGCTGGTGCCA

>977

AGCGGACCTGGAGTCCATCAGCGGCCGCAAAGCCCGGCCTAGGTTTCACCGAGCCC  
TCCTCTCCCTCAGGGCTCACCGCCTGCACGTGGCAGTGAACACCGAGTGCCAAGAA  
ACCGTGCAGCTCTTGCTAGAGCGCGG

>978

GGACGGGATGCGGGTCGCCGGCTGCTGGAGCAGAGCTTGGAGAACTAAGACCTTCC  
CTCCCCGCCGAGGACATTAAGAGCGGCCGCTCCCCGCTCATCCACGCCGTGGAAAAC  
AACAGCCTTAGCATGGTGCAGCTGC

>979

GCCTCAGCCTCTGTTCCCTTACCCCGGGTGGCCCGCGGCCCTCCTGACCCGGCCCT  
CCCGTCCCGCAGCACGGCGCAACGTGAACGCGCAAATGTACTIONCGCAGCTCCGCC

CTGCACTCAGCGTCCGGCCGCGGGC

>980

GAGCTAGGAGGGTCTGGGAGAGAGGACTGTGAGGCATGGGTGGCTCTATGGTCACGCC  
CATCTTCTACAGGTCATCGACATCCTGAGGGGAAGGCCACCCGGCCTGCTTCCACC  
TCCCAGCCAGACCCCTCCCCTGACC

>981

TAGGCCCCAGCCCCTGCTCTCTGGGTCTAGCCTCTCACCTCCCACCCCTCTGTCTCTCT  
TCCTTCTCAGGTCTTCTCTCCGCATCACCATCCTCCTCACCTCCCAGTCTCCCCCA  
GGGACCCCCCTGGATTCCCCAT

>982

GACAGGTTGGTTTGGCTCATAGGCTGTAGTCTGCCACTTCTGTTTTATTCTACCTTCTG  
TTCATTTAGGTCAGTGTGCATGGCATCCTGGCCCCCTCTAGAGCTCCAATCCTCC  
AACCAGAGCCAGCTCTTCCCT

>983

TTGGCCACTTGGTCTCAAACCTCCTCCTTTTTGCTCTTCTACTCCACCCCATCCC  
GGTGATGCAGGAGGAATATCAGGAGTATGAGCCAGAGGCGTAGGGGCCAGGAGAGC  
CCCCACCAGCAGCACAATTCTGT

>984

AGAATGAATGAATGCAGCGTTCTTCTGCCATCTGATAACAGACTATTCTTTGATGTTT  
TCATTTTCAGGATGTACAGATTATAGTGTTCAGAAAGATGGCATTATGGATTCAACTT  
TACAAGAACATCCATTTATC

>985

CGCCTCAGCCTCCCACAGTGTGGGATTACAGGCAAAAACCTCATTATTTACACCTTT  
TTTTCTCTAGGTGCTCCAGCGCTGAGTTGTATGGCCATCAGGGGAGATATGTTCTTG  
GTGGCCAATCTTGGGACAAAGG

>986

GAGTTGGGAGAGAAGAGAAGAGTGCTTGGTATCTTGACAAACCCTCCTACCTTTTCTC  
CTAACTACATAGATCTTGAAAAGCCACTACCGCCTGAGCCAGCAGCAGCACCAGTCT  
CCACAAGTGAGCTGAAAAGGTTG

>987

GTTTGGGCAGGTGGGATGCAGGTGTGAGCACCACTTCTCCTACAGACAGCTTCTTTT  
TCGTTGTTTCAGGGGAAAGAAGGAGGTTTCATTGTGAGACTCCAGCAAAGCTGGC  
AAATATACAGTGTCTGTGTTTGCTA

>988

ATCTCACTTCACTTCTGGGTTCTGTTGACCTTTGTGCCCAAGTTACTGACTAAGCATC  
CACTTCTCAGGGACCCTCAAGGGGTGATACGTCATTATGTTGTGTTCCACACCTCA  
GAGCCAGTATTACCTGGCTGAG

>989

TAAGTGAGGATGTGTGAGGCATCCCACCTCCTACACCACCAACAGCATGACCTCTC  
TCTCTGTTTCAGGACTCATATCCAGGCTCAAATATCCAGTGTCTCAACAAAACAAGAAT  
GCACCTTCCACTGCAGGCCTGGG

>990

GGATTTTTCGTCTATTGTAAGAATTATACATTCATGACCCCAAAGAATCACACCAAGACT  
TTATTGTTAGGATCATGGGAAATTGATCAAAGGACCTGACCTTCTTGAAGGAGCTGGG  
GACTGGACAATTTGGGGTAGT

>991

CCTCCCCAGCCCCTTTATTGCTATTATGCAGAGCCAAAAGGAGAAGACTAGTTCCTTGC  
CTTTCCTGTAGGAATCTTCCCATGAGAAGCTGGTGCAGTTGTATGGCGTCTGCACCAA  
GCAGCGCCCCATCTTCATCATC

>992

CGTGCCAAGAAAACGTAAGCAAATATCAAGCCTCCAAATCCTAATGCAACAAGTCCTG  
AATCCCTTGCAGGTATGTCCTGGATGATGAATACACAAGCTCAGTAGGCTCCAAATTC  
CAGTCCGGTGGTCCCCACCGGAA

>993

CTAGGAAGACTAGGACCCCTGCTATCCAAAAAGACTGCAAACCAATTTAATAATTTTT  
TCACCTTCTAGGGGTTTTGATGTGGGAAATTTACTCCCTGGGGAAGATGCCATATGAGA  
GATTTACTAACAGTGAGACTGC

>994

TTACTCATTGCATTTCCCTTGAATTCTGGATTCTAGCCACTCTAACACTTTACTTTTTCTT  
TGTTTTAGAAAAGCAGATGAGCGTCCCCTTTCAAATTTCTTCTGAGCAATATTCTAGA  
TGTCATGGATGAAGAATCCT

>995

TCCACTAAACCTTTGCTGTTTGCTTATATGTTTCCACTAAAGCTTTGATGTTTCCACTAA  
ACCATTTCAGGTAATGGCACAATTGACTTCCCTGAATTTCTGACAATGATGGCAAGAAA  
AATGAAAGACACAGACAGTGA

>996

TGAGTAAAGTGATTTTTTTCTTGGTCTTTTGCTATTGACTTACTCTTTTGTGTACTTCTT  
CTTTTTCAGAGTTTGTACAAATGATGACAGCAAAGTGAAGACCTGTACAGAATGTGTT  
AAATTTCTTGTACAAAATTG

>997

CCCGGCAAGTGTGATTGTGACTGGGTTGGATAAAGACATTGATTCTAACGGGTCAACT  
TTTGTTCAGAAATCAAGGAAGCCTTCTCCCTATTTGATAAAGATGGCGATGGCACCA  
TCACAACAAAGGAACTTGGAAC

>998

GAAATGATTACTGCAGAGCAGCGTTAATGGAGTGCTTACTTTACATGAGCTTTTTGTTT  
TTAATTCGAGGTAATGGCACCATTGACTTCCCCGAATTTTTGACTATGATGGCTAGAAA  
AATGAAAGATACAGATAGTGA

>999

GCATAGCTAAGTCAAAGACCTACTTCCCCACACTACATCATTAGCAATAACAATTGCTG  
AATGTTTACAGGATGGCAATGGTTATATCAGTGCAGCAGAAGTACGTACGTCATGACA  
AACTTAGGAGAAAACTAACAG

>1000

TAAAGATGTTGTGTTTATTAAAGCTGTTTTCAAAGATAACCAAAGTTACTATTATATTT  
GTCTTTTTCAGAATTCGTACAGATGATGACTGCAAATGAAGACCTACTTTCAACTCCTT  
TTTCCCCCTCTAGAAGAATC

>1001

TATTTAGAAGGAGTTAAATGTCTTTTGTAAGTTTCTTACACAGCTTTCTTTTTTTCCC  
TTTTTTACAGGCAACTTCGGGCTCGCTGGAGAACAATAAGGGGCACCAAAGCCCTCT  
GAGGTTTTACTTTAAGGTTTCGC

>1002

GACTTCCACCATTTTCTTCAAGCATCATCTGTGTTGTTGGAGACTGACATCGATCTTTGC  
CTCTTTCAGGTTCTGACCCAGCCAGTCTGGTGACTGGCCTCTGCCTTCCACCGGAG

AGACTACTGACCTTCTCACCTC

>1003

AAAGAGCACGTCGGGGTGGCTCTGGGCTCCTGGGCTGGCCCCTGACCCACCTTCTCT  
GTTCTCTGCAGTCTGGCAGTCGAGGGGAGCTGGGCCCAAGGCACCCAGGGTCCC  
AACGGCACCAGCGGTGTTTCAGGGTG

>1004

TATGCTTTACGTAACAATACTTCTGATGATCCTCTCTCGAGTAAACGCCTGCACCCTGT  
TTTCCCAAAGAACAATTGCACAGTTAGCCGCGCACCTAAGGAAGCCTTTGGCACCCG  
GGTCCATTGGTCGGCCCCGGTCC

>1005

ATCAGACACCGCTGTGGTGTGGCTGCAACAGATACTCTAACCATATGTCTGTGTCCACA  
CCTGGTGACAGGAAACCAGGGTGACAGAGGAGACAAAGGCGCGGCAGGAGCAGGGC  
TGGACGGGCCTGAAGGAGACCAGGG

>1006

CAGCTGGATGTCAAGTCCCCCTGCTTTCAGTCCGGGCTGCAGCTGAACTCACCTTCT  
GCTCTGCCCAAGGACCCCAAGGCGTGCCCGGCACCAGCAAGGACGGCCAGGACGGT  
GCTCCCGGCGAGCCTGGGCCTCCCGG

>1007

TGTGCCACCATTGTTCTAAGGAAAAAGGCATCTTTGGAACATGTGTAAAGTCTAACTTT  
TTCCCTGCAGTGTTTTGCAGGAAAAATTTAGATAGCACAAACAGTGGAATTCACGAT  
GAAGAGATCTACTGCAAATCCTG

>1008

TTCTGCCTTGTGTACTTAAAAGGGCCCTGTGGAAACTCTTGCCTACTTTTTTTTCTCT  
TTTTACAAGTGTTACAGCCTCACAGGCCTACAACAAATCCAAACACTTCTAAATTTGCT  
CAGAAATATGGAGGTGCTGAG

>1009

TTGCCATACATCTAAATTGAACTGTAGGAAACAGGCCTCTCAAACATGCTGACACATTC  
ATCTCTTCCAGCCCTGGCACAAAACTGTTTCCGATGTGCAAAGTGTGGGAAGAGTCT  
TGAATCAACAACTCTGACTGAAA

>1010

TGGGTCTTAAGCAGTGCTAGCAAAGCTTAATGGACTTGCACTAACTATCCTTCTCCCT  
TTCCTTTGTAGGATGCTATGCAAAGAACTTTGGGCCCAAGGGATTTGGCTATGGCCAAG  
GAGCAGGGGCTCTTGTTTCATGC

>1011

GACCCCTTCAGTGGCCACAGCTCAAGTGAGCCCCTGACCTGGAGTCTTTTTCTCCTC  
ATCAACCACCAGGCCAAGGAGGAGCAGCAGGATGACACAGTCTACATGGGCAAAGTG  
ACCTTCTCATGTGCGGCTGGTTTTG

>1012

CCTGGGCTGGGCTGGGCTGGGCTGGTGGTCACCTGGGCCTCAGTTTACCCTGCCTGCT  
GCTTCCACCCAGAACTTTAGATCTCCCTTAAGAGCAAACAAGGCCCGATCGATGTTTT  
CCTGTGCCCTGAGGAGACCGTAG

>1013

CAGGCACGACAGCCCCTGCCTTCTCCCTGCTGGGGCATCCCCGCCTGTGATGCTCC  
CCGTCTCCCCAGAACCGCTGTTGTCCCGATGGGCAGCCTGCGGGCTCCCGTGGACGA  
GGACCGCCTGTCCCCGCTGGTGGC

>1014



GTAAACAGAGACCCAGAGCATCTCCAGCCCCGGGTGGCAGCCTCCTGATGCACG  
CTTGCTTTGCAGCCTGGTCAACGAGCTGGCCTTACCGCCCACAAGATGATGGCTGA  
CGAGGCCCTGGACAGTGGGCTGGTC

>1015

CTTCATCTGCGGGAGGCTGGAGGAGAGGCCCTTCCAGCCCACCCGGTCCCTGATCT  
CTTTCAGTGCAGCCGGGTGTTCCAGACAAAGAGGTCATGCTGGATGCTGCCTTACCC  
CTGGCGCCCGAGATTTCCAGCAAG

>1016

TCTCATGCTTTATCCTGATTGGCCCTGCTAATCTCTCTCCTCGTTCTCTCTTACCCT  
CGGTACCAGGCGTCTGGAACATGAGCATGCTGCAGACCCAAGACCTCGTGAAGTCG  
GTCCAGCCCACGACTGAGAACA

>1017

CGGGTGGGAGGCGGTTGCTTGGGGGACAAAAGACACAAACCCACACCTCCTATTT  
TCGTGTTCCCAGGAGACATCAAGCAGGAAGGGTGGTGCATTTGAGAGGGGCCG  
CCCTACCAGCGCCGGGTGCCCTGCA

>1018

TTTCTGACCTTACCCCATTTTTCTCTGCCAAGGTAGCATCTTACCCAAAAGTGT  
TTGTTCCAGGTCGCCAGGCTCTGGGGCATCCAGAAGAACCGGCCAGCCATGAATTAC  
GACAAGCTGAGCCGCTCGCTCC

>1019

ACTCCCCACCTTACCCATACAAAGGCTGGGCGGCTAGCAGGCTGACCAGACCTTCT  
CTCTCCCATAGGTGGCTGGTGGAGCGTTACGTGTACAAGTTTGTGTGTGAGCCCGAGG  
CCCTCTTCTTTGGCCTTCCCGG

>1020

TTTGCATATAGACCAGTGAGAAGCTGGAGCTAGCACCCTGGCTTAGGTTCTTCCCTTT  
CCCCCTGACAGTGGGCGGCTTTCTGGCTGGGCTGCCCTTACGACCATTGCCAAGCAC  
TACAGTTGGAGCACAGCCTTCTG

>1021

CCTAGACCAAAGCTGGGTGGATACGGAAGTGCTTAGGGCCAGCCTGATGAGGCTCCTT  
TCTCCCTTCCAGGATGACCATTGATGCCGATGCTCACTCCACATGCTCAGATTTCAA  
TGGATTCTCACTTTGCCCTCTA

>1022

TTCATGCTATTGGAGACCTCAGGTGGGCTTCCAAGTCTCATAGGACCCTTTTCTCACA  
TTCTTTCCAGTTTCTATCCTGAGAATGAGATGATCTACAAGTGGGAAAATTTCAAGC  
TTGAAATCAATGAGAAGAACTC

>1023

TGTTACGTCTGCTAAGGGGGACCGTCGTGTCAGCACTGTAATGCAGTGATGTTTTTT  
GTGTCTTTCAGGTGACTTTCATGGTCATGACGATTTTCTCAATGTGAGCAGGCGGTTTG  
GCTATGTTGCCTTTCAAACCTA

>1024

GTCATGGAGTCTTTTAACCAATGTCGCACATAGGTCAGGAGCTGAGCCATCACTCTTG  
TGCTCTTGACGGATCACCTCTGTTCTGACCATGACCACGTTGGGCACCTTTTCTCGTA  
AGAATTTCCCGGTGTCTCCTA

>1025

CCGGAGGCAGCACTTAGACTTGGGTATCTTCCCTTGACTTTTCCCACTTCTTTCCTT  
GTCCATTTAGCCTCGTATCAATAGCCGTGCCCATGCCGTACCCGTGCACGTTCCCGA

GCCTGTGCCCCGCCAACATCAGG

>1026

TCTCTCCTCCTGCCCCAGACCCAGGTCTCCCCTTCTTCTACATGACCACCTCTCCTCC  
CCCTTGCTCAGGCCAGCTGTCTCTGAACGAGTTTGTGAAGGTGCCCGTCGGGACAAG  
TGGGTGATGAAGATGCTGCAGAT

>1027

AATATTATAAAATAGTCTCTTGAAGATTTTGTTCATCTGATCTTTTTAAAAATTAACCTTTT  
TTCTTGACGCTCGGAAAAACAACCATCATTTTAAATCTGAATCTGAAGAGGAGAAAGC  
ATTGATTTATCAGTTCAGTCC

>1028

AGGGTGTGATGTGAGAGAAGGGATTGGTAATGCCTCTTGCCACTGGCTCGGATCCTCT  
TCCCCACACAGGTACCCATCACGGGTGTTTGTGGGAGATACCTTCTGTACTTTGCTG  
GCATGACCTTTGCCGTGGTGGGC

>1029

CTTCTATTAGCCACAGGGAGGAGGGTTCAAATAGTGGCCAGTCACATGAAGCTATCT  
TCCCCCGCAGACTCAATATCAAGACAGGCAAAGTGGAGATGAGCTATTCCAAGTTCA  
AGACCAAGAGCCTCTCTTTCTTG

>1030

GCATTAAATAGATCCACATTCTAAAGCATAGGTATTAGCTGAGGTTCTCTTACCTCTG  
GTCCCTCCAGGTGGCAGAGAGCCTCCAGCTGGTGACAGTACACCAGAGTGAGACTGA  
AGATGGTGAATTCAGTGAATGTA

>1031

GGGAATCGAGTTTATACCTCCGTGTCTCCCTTCTGCGTGATTCTTACTCCAGTCCATTT  
CTCCTTGAGATCCTGGGCAGTGCCATCACCTTCTCCATTGATATCAGCTCGTTGACT  
CTTCTATGATGTCTGAGTCC

>1032

GCAGTGGCTCTAGGAGAAAGACCCCATCAGTAGGCTCCACTGACTGGCGGTCCACTG  
GCTTTCCCGCAGGGAACCTACTACTGCCAAGAGCGAATTCGTTGTGCTGACCTGG  
AGCTGCCAGTTGGCTCACACCG

>1033

GGCGTCCCCCTCTCCTCTCCAGGATCAGGAGGAATCACTGCCTCTCCTCTCCCCGA  
CCCCCTTCCAGCACCAGCAGCAGGTCTTGGGAGCCATTGAGAGGGCCAAGCAGGTCA  
CCGCTCCCGAGCTGAACTCTATCA

>1034

GGGACCTGGGCGGGTGGGCGGGGGACAGGTGGGCCCCAGGCAGCTAATGTTCCCCTC  
CCCCGCCCTGCAGCAGCAGCTCCAAGCCCACCAGCTGTCCCAGCTGCAGGCCCTGGC  
CCTGCCCTTGACCCACTACCCGTGG

>1035

CCGTGTGGCTTTGCCGTCCCCAGGTGAGTGTGGGCGCAGCTTGGGTCTAACTTCTG  
TGTGTTTTGCAGACAGCTGGATAGAAAACGACAGCCTGTGATGACAAGCACGGGG  
ACGACCAGCCGGACAGCAGCAGCCT

>1036

GGGGGGACTCCGGGGACAGGAAGCCCTGGGGTGGCGGTGGCCGTTTCTCACGCCCG  
CTTGTGCCCGCAGGTGAAGATTTGGTTCCAGAACCAGGCGGATGAAATGGAAACGCAG  
CAAAAAGGCCAAAGAGCAGGCGGCGC

>1037

GGACCAGACTACTGGCCTCTGAGCATCGGGCCAAGTCCAGCTACTGAACCTGCTCCGC  
TCCTCTCCCAGGTGTGGTTCCAGAACCGGCGCATGAAGGACAAGCGGCAGCGCCTG  
GCCATGACGTGGCCGCACCCGGCGG

>1038

CGGGCAGAGGCTGCTGTCATAGGCAGAGGCCCCCGCTGATGCCGGCCTGCTTGCCCC  
TCACACTGCCAGGTCTTCACGTGCTCTGTGTGCCAGGAGACATTCCGCCGAAGGATGG  
AGCTGCGGGTGCACATGGTGTCTC

>1039

AGCCCAAGGGTGGGTGGCAGGGTTTCATGGGTGCAGGCCGCCCTGGAGGTGACTGTG  
GCCTCTTTTTAGTGTTCTCTGCTCCAGCAGTTCATGCAGAAGAAGGACTTGCA  
AGCCACATGATCAAACCTTCATGGAG

>1040

TCCCAGGCAGCCCTTCCTGCTCTACCCTGGCCCTGGTCCCTCCCTCTGCCTGCCTGG  
TCTGCCTGCAGTGCCACCTGTGCCAAGTGCTTCTGTCTCGGACAGAGCTGCAGCT  
GCATGAAGCTTTCAAGCACCGTG

>1041

CTAGCTGTAGCAGAGCAAGGGGGTCACTTCCCTTGGTGATGGCCTCTGCCCCATGTCC  
CCACCTTAACAGGAATGAGAGGCCACACGTATGTGAGTTCTGCAGCCACGCCTTCACC  
CAAAAGGCCAATCTCAACATGCAC

>1042

CCTGCCCTCCCCTCGTCTCCCATCCTGAGGTCAAGGCCACAGGCTGAGCTCTTGCC  
TTGTGCCTGCAGCCAGCCTGGACAAGCACAACCGCACCCACCCGGGGAAAGGCCCT  
TCAGTTGCGAGTTCTGTGAACAGCG

>1043

CCTCTGCTGGGTTTCTCGAGGGTCCCGGGCTCCTGCATGATCCCCACGGTGTCT  
CCCTCTTGACGCCGTGGAGCAACTGCGTGTGCACGTGACGACGGCACAAGGGGGTGAG  
GAAGTTTGAGTGCACCGAGTGTGG

>1044

TAGGCCAGGGCCTGGCCCCCTCCCCTACCCTAGGATCCCCAAAGTTCTGAGCTCAC  
CCTCCCCGCCAGGCCACCTGCGGAGGCACATGGAGATCCACGACCGGGTAGAGAAC  
TACAACCCGCGGCAGCGCAAGCTCC

>1045

AAGGGTAGAACCTGGGTGGACAAGGGCCCAGCCTGAAGCCACTGAGCCCCAGCTG  
GGGTACATTGCAGAACGGTTGCCATCAACCGGCGGGACCTGGACCCAATGCTGGGC  
GCTTTGTCCGCTACCAGTTCACGCC

>1046

GCCTGTCCTGAGCCTGGCTGGCTAGTTGACTTCAAGGACAGACTTAGCCCTGCCTCCT  
TTTCTTGCTCAGGGTGGAGTTCACAGTGGGAGACAAGCCTGTCAACAACCTCCGCATG  
ATCGAGAGGCACTACTTCCGCAAC

>1047

CCTGAAGCCCCTGCAGTGGCGGGACTCAAGCTCCTGACCTTTGCCCGGCCTGGCTGGG  
CCTCTCTTGAGTCAGCGAGATGATCCGCCACCGTATGAGACCCAGTCTGACAGCTT  
CTACTTCGTGGATGACCGGCTGGT

>1048

AGGACACGGGGACTGGAAGTTTGTGCTGGGCTGACCTAAGGCTTCCCTCCTGCCT  
CTGTGACCCAGGCCTGTGGGGCCTCGTCAACAACGCAGGCCACAATGAAGTAGTTG

CTGATGCGGAGCTGTCTCCAGTGGC

>1049

CCTGGGGTGGGGGAGGGCTTAGGGAGCCCCTTGCCAAAGCTGAGCTGCCCCACTCCC  
AATCCATCCGCAGGGGACATGCCATATCCGTGCTTGGGGCCTATGGAACCTCCAAA  
GCGGCCGTGGCGCTACTCATGGACA

>1050

GGTTAAACAGTCCTAATTGGCTTTGGCTCCCCTACGTGATCCCAGTCTGACCTTGCCAC  
TCCTTCCCAGAGTCAGTGAGAAACGTGGGTGAGTGGGAAAAGCGCAAGCAATTGCT  
GCTGGCCAACCTGCCTCAAGAGCT

>1051

CCACCCTGACTACTGAGGTTCTGTGCACACGTCTCTACCTTCTGCTCAAGACTGG  
GTCTTTCCACAGCCTGAAGATGACCATGGACAAGACGGGTCTCTGCTGCTCAGTGAC  
CCAGACAAAGTGACCATCGGCCTG

>1052

CCTGAACTGAACATTTGATGGTGTGTCTCTCTGGTGCCATCTTAATACCCTTTCTCCTTT  
TTCTGTGCAGAATTTAAATGTGAGTTTCAATCCTGAAAGTTTCTGGACTGCCAGATTC  
ATAGGGTGGATGACATTCAAG

>1053

AGTAGTGCCAGAGGCACCCTGACATCACTCTGAACTGCTTTCTCTTTACATTCTTG  
TATTTTTCCAGCTGACGGCCAGAGGGTGGGTGCCAATTCCACCAGCAGCTGCAACTG  
AAAAGCAAGGTTCAAGAAATGTCA

>1054

CTCTCTCTCTGTTCTTTCTCCACTGAAACTCTTCAAATGTAATGGCTTATCGTGTGGC  
TTTACCCTAGGGGAAAAGATTACCTTGAGGTTGTGTTCAACAGAGGAGGAAACAGCA  
GAGCTTCTTAGCAAAGTCCTCAA

>1055

GAAGTCATATGGAACAGAGTCTTCTAAATGATCTTTACCTGAATCCAAACACATTTGTT  
TCCTTTTTAGATTCAACTTATCAGTATATAAAAGGTTCTGCTGACATTAATCCAACCA  
GGGAATCTTCCCCTGTGGACT

>1056

GTTTGAAAGTGACATGAGTAATGAAAAACAAATGTGATAATCATCACCATTGAAATTT  
TTCTTCTACAGGTGAAAGGACAGTGCTATTGGGGCCTTTCTTACATGGGGACCAACAT  
GCATTCACTACAGCTCACCATC

>1057

CATTCCCATTAGTGATTTGCTTCTTTGTGAGATTAATTTGTTTCTTTCTTTCCCTC  
TTCTTAGTGTGGATTCTTTAAACGCTCTAGGTACGATGACAGTGTTCCCGATACCATG  
CTGTAAGGATCCGGAAAG

>1058

TTGGCCTTCCCTCTCCTCCAGGCCTCTGGGAAAGCGGCTTCCCTTTCTGAGCCACCCCT  
GCTCTCCCAGCTCTCTGTGGATGAGGCCCCAGTCTGCCCCAACACCACCCCGGACC  
TCCTCCTGGCCACCACAGCCAAG

>1059

GGCTCTGGAGCCCAACAGCACAGTGGTGACAGTGGGCATCACTGAATCTGTATCCACT  
TCTGTGGCACAGGACAGGCCAGGCAGTCCCAGTGGCTCTGAGGACAAGGGCAACCCG  
GCGCCGGAGCTCAGGGCCTCCTTC

>1060

AGGAGAGCAGGGGAGGGGTTGGGGGGTGCTCCTGGGCTTCCCTAGCTCAGCCTGCTC  
CTTGTGCCACAGTCATGTCGGAGGCGGGCAGTGGGACCCTGGAGGACGAGTGGCAG  
GCCATCTCGGAGATTGCCTCTACTTG

>1061

GGGGCTGGGAGTCAGCTGGTGCCTGCCCCCTGCCTTGGTCTGCTGAGTCTTGACCC  
CCATGTCTTCAGGCCAGAGCCTGGGAACCTCTCAGAGAAGGTCTCTCACTTGGAGTCC  
ATGCTCAGGAAGCTGCAGGAGGAC

>1062

TGGGGGGAGTCAAGGGCTGCCCCAGGAAAGGGGCTGGCGGCTCTGACTCCTGTCTC  
CCCGCACCCCAGGAGAAGGCGGACAGGGCGGCCCTGGAGGAGGAGGTGCGGAGCC  
TGAGACACAACAACCGCGGCTGCAGG

>1063

CTAGTCTTATCCCAAAGAGTCTGGAAAATGTGAGCACCTCCCTCACTCAGCATTTC  
CCTCCCTCCAGGACTCTGATGAACAAGACCCTCAGGAGGTGACATACGCACAGTTGAA  
TCACTGCGTTTTACACAGAGAA

>1064

ACAGTCTTATTCCGAAATAGTCTGAAAAATGTGAACACCCTCCCTCACTCAGGATTTC  
CCTCTCTCCAGGACTCTGATGAACAAGACCCTCAGGAGGTGACATACGCACAGTTGGA  
TCACTGCATTTTACACAGAGAA

>1065

ACAGGGCAAACAGGGGGCCCCCAGGAGCCCCAGCCTGTACCCCGTCTGACACCCC  
TTCTGCCCCCAGGGAACGACTCCATCTTCCATGACATCGACAGCGATACCTCCTTAAC  
CAGCCTCAGCGACTGCTTCCTCGG

>1066

TCACCCTGGGCTCACAGGGCTCAGAGAAGGGTCTGCTCAGCATCCTCCCCACCCAC  
CCATACCTGCAGTGACCAACCCATGTGACCGCAAGAAATGCGAGTGGCTCTGCCTGCT  
GAGCCCCAGTGGGCTGTCTGCAC

>1067

CCCTGACCTTGTTGCCTGTCCCTCTCCTCTATTCCCCTGGCTCTGCCCTTGACGGGC  
CCTTCTGCAGCTCCCCGGCCTGGAACCTGTAACCTGCAGTGCTTCAACGGTGGCAGC  
TGTTTCTCAATGCACGGAGGCA

>1068

CCCATTCTCTGCTATAGGGCCAGGTGGTCTCGAGGGCCACAGTCGCGCTCACACATC  
CTCTCCACCAGGCATGCCACGTGCCGGTGGCCCCACGGGCTTACGGGCCCCAAATG  
CACCCAGCAGGTGTGTGCGGGCTA

>1069

CTCTGTTCAACCTATGGAGAGCCCTCATGAGGGTGGGGCTTGAGGCACTTCTCTCCCTC  
CCCAACCACAGGGCAGTGCTTGCTACTGTGAGAACTTGGCACATGCCAGATGGCT  
GCTGATGGCTCCCGACAATGCCG

>1070

CCCTCCCTTCTCAGCATCCCAGGCACGCCTCTGCCAGCCCCAGCCCCAGCCTCTGATT  
CCTTCTGCAGCTGCACGGATGGCCGGGTGGCCCCAGCTGTCTGACCTGCGTCGGCC  
ACTGCAGCAATGGCGGCTCCTGT

>1071

GAGCAGGGGGACCGTGTGCCTCCTGCTTCCCTGAGCCTTGGTGACTCAGTGTCCACC  
TCTTCCCTCCAGATATAGCCTCCATCCTAATCCCTCTGCTGTTGCTGCTGCTGCTGGTTC

TGGTGGCCGGAGTGGTATTCTG

>1072

GTCATTATTTGCCATCCTAGCCTTCCCCCAATAATCTCTGTCTCCTTATACTCCTGCC  
TTTCCCAGGGCTAAGGGCTTCCAGCACCAACGGATGACCAACGGGGCCATGAACGT  
GGAGATTGGAAACCCACCTAC

>1073

GTGGGGGTGGGGTAACCTGGGCTACAGGCCAGCTCCTGAGCCCTACCTGAACCCTCT  
GTCACCCTGCAGCCCACCAACTTACCAACCCCGTGATGCCACACTCTACATGGGGG  
GCCATGGCAGTCGCCACTCCCTGG

>1074

ACCTGTCCTTGTCTCACTCATCGAACAGATGGGAATTTAGTCACCTAATATGTTTTGTT  
TCTATTATAGGCCTTCAATCTCAGATTTATGAAAATAATTACTGGATTGGATTATCAT  
ATGATGAAAGGGAAAGTA

>1075

GGGGCCCAAGGAGAGCTGAGGAACAGGACAGAGGGTGCCAGGTCCTAAGAAACAGT  
ACTTATCTCCTCAGGTGGACTTTGAGGGCAGCCTTGCTGAAAATCGCTTACAGTCCTC  
CCCAACATAGATCCTGAAATTGATG

>1076

GCTGGGGATCTTCATAGCAACCAGGGCAGGAGACTCACTTTTGATAACCACGTGTCTT  
CCACCCTCGTAGAAAAGCGAAGACTGATGGGACTTCCCAGTTTCCTTACTGAGGTTGC  
CCGCAAGGAGCTGGAGAATCTGGA

>1077

TCTAGGGTGGGGAGGTGTCCAGTAAGTCTCCAAGCAGGAGAGTAGAGTATCTCCTCTT  
TACTCTCCCAGATTGGCTTCTTCTTATTCCCCGCTGCCTTCCATGGTAGAGGCC  
AGTGACTTTGAGATTAATGGAC

>1078

AGGCCAACTGTGGTCAGTGCGTTACGGGCTTCCAATACTAACTTTCCCTTGCCACCTT  
ATACCCAGCAGGTGGCGAAAGCAGTGAACAATGCCACTGCACAGTCGCTGGTCCTTAT  
TGATGAATTTGAAAGGGAACCA

>1079

ATTTCTGACCCTTATTTCCCCTTCTCTTCCCCTACTCCCTCCACCTTCTTGCT  
TGTTCTAGGTCTCAGACTTGATCCGAGTGGAACCCATCAAGCCTGTCAAGGATT  
TGCTAAAGAAGAACCAAATGG

>1080

GTTAGAAAGATGGGGAAGGAGAGGAGGACCAAGAGATGCAAAGTCCACAGCTTTGA  
ACCCCTGTACCCAGTTTCTCTCAGAGGAGAAGCTGCACTATCGTAGTGCCGAACCAA  
GGAGCTGGATGCATTGCTGGGGGACC

>1081

TAGGGGCTCTGCCTCTCCTTCACTTTCCCCTGGAAGTACCTCCAGCTCCCTTCTCA  
CCCCTCCAGACCAGGAGACGCTGCTGATGTACCAGCTACAGTGCCAGGTGCTGGCA  
CGAGCAGCTGTCTTAACCCGAGT

>1082

GGCTACATCTTCTGGGGTTTCATCTATCTTGATCCACAAGCCATGCGAGGTGCTCTCC  
GCCACTGCAGACATCCTCTGATGGAAGTCTGTGCCCGAACCTTTGTGCCAACTCCA  
CAGAATGTGGTGGGGACAAAGGG

>1083

ATGCCTTGAGCCTCACTTTCACCTCAGCCCACGGCACCAGGCCCCAGGCCCTGTCTCC  
TTCCCTATTCAGGTAGGCTTGATCACATTCATGGCCCTGGTAGGCAGCTTTGTGCCAGC  
AGAGGAGGCCGAAATTGGGGCAG  
>1084  
AGGCCAACTGTGGTCAGTGC GTTACGGGCTTCCAATACTA ACTTCCCCTGTCCACCTT  
ATACCCAGCAGGTGGCGAAAGCAGTGAACAATGCCACTGCACAGTCGCTGGTCCTTAT  
TGATGAATTTGGAAAGGGAACCA  
>1085  
GGCAGTGCAAGTGCAGAGGGGCATATGGGGTCCCCATGGCTCCGAATGCTAACCTCTG  
CCCTCTTTCAGGTGGATGGGCTCGCGCTTCTGGCCGCTGTGCTCCGACACTGGCTGG  
CACGTGGACCCACATGCCCCACA  
>1086  
AGGATTGGCCAAGGGTTTCAGGACAGGAAGGAGGTGATTGATGATACTGTCTTTTA  
TTCTCTTTAAGACCATGGAGACCTGTGAGGATGGCAACGATCTTGTCTTCTTCTATCA  
GGTTTGCGAAGGTGTTGCGAAGG  
>1087  
GATTTCTGACCCTTATTTCCCCTTCTTCCCCTACTCCCCTTACTCCTCCCACCTTCTTG  
TTGCTTAGGTCTCAGATTTGATCCGAGTGGAAAACCCATCAAGCCTGTCAAGGATT  
GCTAAAGAAGAACCAAATGG  
>1088  
CCTCTCCCCTGCCCAGGGATTGGTTGTCCATTCTGCCATAAATCTTGCGATTTTCTC  
TCTTCTCAGTTGCCAGACATTAGTGGATAAGTTTATGAACTGGATTGGAAAGATCCT  
AACCTGGACTTGAACGTTTTC  
>1089  
AGGCAAGAGAATCTCTTGAACCTGTGAGCCAGAGGTTGCAGTGAGCCGAGATTCCAC  
CACTGCACTCCAGCCTGGGCAACAGAGCAAACTCTGTCTCAAAAAAAAAAAAAAAAAA  
AAGGCAAATTAAGAATTTCAAGTCC  
>1090  
TAAAGGAGGAATCAGTTTTATTGTTTGTACTGGACTATACAAATGTAAAATCATTTC  
ATCATTTCAGAACTGAAGAAGCTGAAAGAAAAGCCAGCACCAGCTCGAGAATTT  
GGAACGAGAACAGAGATTTTTAA  
>1091  
TGTTAGTTTTTGAAGGTGCGCTATACTCGATAAATAATGTTCTTCTTTTTTTTTTTTC  
CTTTGGCAGAGGAGATTGAAGTGGATGTTGAAAGCACAGAGTTCTCCCATGGAGAAG  
TGGACAATATAAGTACCACCAG  
>1092  
GCCCAGGTGCCTCTGCCCCAGGGCTGGGCAGAGGCAGCCTGTGGTGACCGCAGCTGT  
CGCTGCCCTCAGCTGACCATGAATGACTTCAGCGTGCATCGCATATTGGGCGCGGG  
GGCTTTGGCGAGGTCTATGGGTGCC  
>1093  
GCCGCTGAGGCTCTGCAACCCCGGGCGCCCTGCTAACTGCCCGCCCCCTCCCCTCCT  
CTCCCCTCCTAGGACTGCCATTATTGTCTGCATGTCATACGCGTTCCACACGCCAGA  
CAAGCTCAGCTTCATCCTGGACC  
>1094  
CCAGCTGGCATCTTGCTGGCTGGGCCCCATCCTGAGCTGCCCAGGCAGCTCACTGGG  
CTTCTTCACAGCCAGCCAACATCCTTCTGGACGAGCATGGCCACGTGCGGATCTCGG

ACCTGGGCCTGGCCTGTGACTTCT

>1095

CCTCTCTCCCTGAGCTGGGATGGGGTCAAGGGCTCTCCTAAGCCCTGCAATGTCCACT  
CCTCTCTAAAGGCCGTGGAGCTGCCCGACTCCTTCTCCCCTGAACTACACTCCCTGCTG  
GAGGGGTTGCTGCAGAGGGATG

>1096

TGCGGCAGGGACTGGGGGTGCTCTGCAGCCCCACCCCGAGCTAATGCCATGACCCT  
GTTCTGCTGCAGTACCCTCCCCGCTGATCCCCCACGAGGGGAGGTGAACGCGGCCG  
ACGCCTTCGACATTGGCTCCTCG

>1097

TGGGCAGCCTGTGGCTGATGGTATTCCGGCATCTCTGTCCACCCATGTGCCCTGCCCC  
ACCTGGTAAAGTTACTGGACAGTGATCAGGAGCTCTACCGCAACTTCCCCCTACCAT  
CTCGGAGCGGTGGCAGCAGGAGG

>1098

CCGGGAGCCGGGCTTCCGGGTGGCTGGCCGGCCCGCTTTCACCTGCACCACCCATCC  
CTGGCCCTGCAGCAGAGCCTGCTGACCATGGAGGAGATCCAGTCGGTGGAGGAGACG  
CAGATCAAGGAGCGCAAGTGCCTGC

>1099

GGAGGCCGAGGGGCCAGGCCAGGCAGGCTGGGGAGAGCCCCAGCTGACAGAGCTGG  
GCTTGGCTGTGCAGAGCGACCCTGAGCTGGTGCAGTGGAAGAAGGAGCTGCGCGACG  
CCTACCGCGAGGCCAGCAGCTGGTGC

>1100

GACTGAGGCCTGAGCACTTGAATGCCAGCATCACACCCTTTGTCTGTGTGACCCCC  
CACCTCCACAGGCTGTGCTGCACATGGAGCAGCAGAAGCAGCAGCAGCAGCAGCAG  
CAAGGCCACAAGGCCCGGCTGCC

>1101

GGGCCTCTGGGTTTCGTTTTGTAGGAGGGGTTCCGGATGTCCTGTGCCACCATTCCCTCCC  
TCCATTTCCAGACGATGTACCTGTCCAGCTCCAGCCGGTGACCAGAAGGAGGTGGAC  
ACTTCAGAAAAGAACTTCTCGA

>1102

CACTAACTGACTTTCAGATTCTAAAACCACCATGTGGATTCCACAAACTCAGAAACATT  
ACTCCCCACAGGACTTCATCCAGCAAGCAATTTCTATTCCAGTTTTCATTCTGGATG  
GGGCTGTCTCGGAGGAACCCCA

>1103

AAGTTTCTGAAACAAGGTGGCAGTAAACCTAAGTTTTTTTGTGGTTTGTGTTTTT  
CCTACCTGCAGATTTAGAGTCCGAGGCGCTGTCTCCAGACATACCCTTCAGGTACCTG  
TGCATATATACAACGAGGAGCT

>1104

CACGCAAAGAATAAGATGGGTTGATGGGTTGCAAGCATCCTGGCTCACTCTACCCTAT  
GCTAAACTCAGGCGACCGTGCTGTGTGACATCATAGTCTCTACTGCATGAAGAAAAG  
ACTCTACTATCGGGAGAAGAAAT

>1105

GCGCAACTCCCTCCCGCCTGCCACAAGGGTCCAGGGGCACCTTGATCTGCTTGTGT  
CCTTCTTTGCAGGGTCTTGCTAGTGAGCTGGACCAGTGAGGCCTACCCACACCTGGG  
CTCTCCACAGCCCCATCAAAGAAC

>1106



CTGGAGGCTGGATTGAGTCTAGGGTCACTGTAACCTACCAAATGCCGACATGCCCCAC  
CCCTCGCCACAGGTGGGTTTCATTGACTACATTGCTCACCCACTGTGGGAGACTTGGG  
CTGACCTGGTCCACCCAGATGCAC  
>1107  
AAGCCTGTCCCTCAGTCCCCTTTGACCAGTAATCTCTTCTTCTGCTTTTCATTCCAAA  
AATGCTTCAGGCCAATACTGGCAAGTTCTAGGGGGCCAGTGTCTGGGCTGAGCATTG  
GGACAGGCAGGGCAATGCTGGG  
>1108  
GAGGGTGTGGCTGTGAAAGGAGAAGCTGTGGCTCAGGCCTGGTTCTCACCTTTTCTGG  
CTCCAATCCCAGACCAGGTGCCTTTCTCCGTGAGCGTGTCCCAGTTGCGGGCCTTGA  
TGGAGGGAACAAGCACTTCTGAG  
>1109  
GAAGTGGATAGAGGGGACAGCTGGCAAGCAGCAGACATGAGTGAAGCAGTGCCTGG  
GATTCTTCTCACAGGTCAAGAAGCAGGCCTTGGGCAGTTCCGCTGATCGTGGGCATC  
TTGCTGGTGTGATGGCTGTGGTCCT  
>1110  
CAGCAGTTTAGCATATTTTTGCCATGAGCTCATCTCGTGTATTACAGCTCTTCTCCT  
TTCTTTCAGGAGGAAATCTCTGACATCAAAGAGGAGGGGAACCTAGAAGCTGTCTG  
AATGCCTTGATAAAATTGTGG  
>1111  
TGGAAGCTGAACCTTCTCCACAAGGGCCTTCCGCCTCTTATTCTTGTGCCCCGTG  
TGGCCCTCCAGGCAGCCAGCGGGATCCCAGAGAAGGATCTGCACAGTGTATAGCAC  
CCTACTTCTGCAGCAACGGGAC  
>1112  
GGGACAGTGGAGGGCAAGGATTTGGGTTTTCTTAGATCCCAGTTTGTCTGTTGTCTCCC  
ATTGATTTAGGCTCTACACAGAGAACAGAGGGAGCTGGTTGCTGTGCTGAGGGAGCC  
TGAGTGAGGAGACCGCCAGCCCC  
>1113  
GCTCAGCCTGGCCTCCTTGGCCTCCTCTCTGAGTGGACTGGGGTCTCACTGTGCCTGTT  
TATTCTGCAGGTCTTATGGAACAGATCGGAATATTCCGGAACATTGCCAGCACTAC  
GGCATGTCGTACCTCCTGGAGA  
>1114  
CTGCTCTGCGTCTCCACCAGGGGGAAGGCTGTTGGTCTCACCTGGGCCCTGACCC  
CGTTCTCTCCAGGACCAGGAGAAGGTGCTGGACAAGTATGAGGACGTGGTGCAGGGG  
CTGCAGAAGCGAGGCCAGCAGGTGG  
>1115  
GAGATGGCAACCGGGCTCCCAGGCCCTCAGGCCCTGCCGGGATCCTGACTGTCCAGCC  
TGCCCCGCCAGGGCCTGATCTCGCGGGGCTACAGCTACACCCTGCAGAAGAACAAC  
GGGGAGAGCTGGGAGCTCATGGACA  
>1116  
GTCCGCAGTCCCGCCTCTGTGGGTGCAGGGGGTGGTGGGCTGCCAGTTCCAGCTCA  
TTCGTCTCACAGCCTGGGCAGCCAGTACCGGAGCGTGCAGGAGAAGGCAGCTGGGAG  
CAAACGCACGCTGCAGCAGCGGTAT  
>1117  
TAGGTCCATCCCTGGGCCTCACACCCTGGCCGTTGTACACCTGCCTGTGTCTCCC  
TCCCTCCACAGATGCCTCTGACCTACAGGGGCGGCAGCTGCTGGCTGGCTTGGACAAG

GTGGCCAGCGACCTGGACCGCA

>1118

CCCTGGGCACATCCTCAGGGGAAGGGGCTGCCTGGCTGTGTCCAAAAGTGGGGGCC  
CTGTTCCACAGAACATCACCAACGAGCTACTGCGGATTGAACCTGAGAAGACGCG  
GAGCACGGCTGAGGGCGAAGCCTTCA

>1119

GCAGCATGGAGGTTGGGGTGGGGTCAGGGGGCCAGGTGGGCATCCCCGACGCCTGA  
TTGGTGTCTCAGGGTTGATGTGGCCAACCGCCTGGAGAAGAGCCTGCAGCAGAGCT  
GGGAGTTGCTGGCCACACACGAGAAC

>1120

CAGGGGGTGTTCATCGCCTGGCTCTGGGAGCTCTGGCCGTAGCACCGCCGTCTCCTCT  
CTGCCCCGCCAGCCCATGGCCTGTGAGTTACAGGCCCAGAAGTCCCTCCTGGGTGAGG  
TGGAGCAGAACTGCAGGCGGCCA

>1121

AAAAAAAAAATGAGGGCTCGGTGAGGCATCTGTTTGTGTGGCTGAGGCCTGAACGC  
TTTGCCTTGACAGGGCGCAGAGCCTACAGAGCGCCAAGGCAGCCTACGAGCACTTCC  
ACCGCGGCCATGACCACGTGCTGCAG

>1122

TACTGCATCCATGGTTGCTTTTTAAATTTTTTTCTGGTTAGTTTTGATTTTTAACTCT  
GTCTTACAGAACCTGCTAGATGAGATAGCAAGTAGGGAGCAGGAAGTACAGAAGATCT  
GTGCCAATTCACAGCAGTACC

>1123

GGTACAGGAACATGTCTGTCTTCTCAGCTGTTTTAATCTCCCCTGCCATGTCTCTC  
CCTCATGCAGGACTATGAGTTAGAAGCAGAAAACTAAGGTCTTCTCGACTTGGAG  
AATGGAAGGAGCAGCCACGTGA

>1124

GTCTAGCTCTGTGTTGCTTACCCTGTTGACACCTGTTTGTGACCGCTCTCCTAATCCTC  
TTCTCTGCAGGAAGCAGCACTTGCCGCCAAGTCACTGAAGTTTATGCCATCAACAGA  
CAGAGGCTGCAGAATCTGGAGT

>1125

CAGGTGGGGACAGGCCCTACATGTGCTGCCAGAGCCTGGCTTAACTTGTCTTGTCT  
TCTCCATCACAGCAGCCGGAAGTAGAAGTGACCCATGAGACCCTGCAAAGGAATAGG  
CCGACTCTGGAGTGGAGGAGGCGT

>1126

GGGGATATAAGACAGTACTGTTGAGGACCCTAAGTTTAGCTCCACCTGATCTTCCTC  
TGTCTCTGCAGAAGCTGCTGATGGGAGCTCCACCCTGGGAGGGGGTGCCGGCACCAT  
GGGATTGAGCGCCCGCTACGGACC

>1127

AAGGGTAGGAGACGAGGGCCAGGCGCCAGGCCATCAGAAGCAAGGCGTCCACTGC  
TTTTGCTGTTCTAGGAATTTTTGAACCGAAGAAAAATGACAGAGTTTGGCAACCTGGC  
ACTAATTGATCAGGATGCTGGGCAGG

>1128

AAAAAAAAAAGAAAAAATGTTGGGAGGAATGAGCTTAAATTTTTAGGAAAGCACTG  
CTTAATTTCCAGGGCGCTGCTGGGCGGCCACCACCAGGAGGGACTCCTCATCTACT  
CCCTGGACACCCGCTGCTTTTGA

>1129

CCGGGGTCATCTCTCTCCCTGGTTTGGATTGGTGGCAGAATAAGCATGATTTTTTC  
TCCTTTTGCAGTTGAAGTGGTACCTCCTCCCTCCTGAACTGTATGTGGAGAAAGTGC  
TGGAGTTTTTAGCTTCCTCCTT

>1130

CAATGCAGCATGAAGTGAGCCACTGTACCACGGGGTGAGCCCCGCACGCTTAGGGA  
GTCTCCCTTTCAGAGCCGGGACGCTGCTGCCTGTCATTTCAGTTCTCCAGAAGAGCAT  
CCAGCGGCACCTGGACGACCTGTCG

>1131

AGGTGGTTGGGTGCAGGACAGGCCAGGGCCTGGGCGTTGCTGGCATTGACCATCCCT  
GTGTGATTGACAGCTGTAGCTGGAACCACTATAACATGCAGTACGCACTAGCAGTTTCC  
AAGCAGCGGGGCACAAAACGCTCC

>1132

CTGGTTGGGATGAGGCAGAAGGTGGAGATCCTGCCAGCAGAGTGAACCAGAGCTTCC  
CTTTGACCTGCAGAACCCAAGAGAGTGGACGCGGATGGTGATCCGGAACATAGCCAC  
CTCTGGCAAGTTCTCCAGTGACCGCA

>1133

TCCTTAAATCTGGTTAGATGGATAATTCATACCTATTTTTTTTTTACTCTTTTCTTCTGT  
TGAAACAGGCTTCACACTGTATAAATAGGAGAGGATGAGAGCCCAGAGGTAACAGAA  
CAGCTTCAGTTATCGAAATA

>1134

AATGGAGGTTATAGTGTAGGGTTTGGGATAGGAGTAGGAGACAGGAGTCTCAAACCT  
TCTTTCCCCAGGAGTGAGTCTGGAACCTGAAGGACCTGGATATTACCTCTCCAGAA  
CTCAGGAGTGTGTGCCATGTGCCA

>1135

CCCCCACCACAGGCACAGACTTAGTGAACCTCCCCCATGCAAGGCCTGACTGTGGTC  
CTCTCTGCAGTCCACATCACTCTGGATCCAGACACAGCCAATCCGTGGCTGATACTT  
TCAGAAGATCGGAGACAAGTGAG

>1136

GGTGCAGCCCGCAGGTGGCAGGATGCGCCTGGGCTGGGGCCTCCGACCGCTCCCC  
GCTGTCTCCTAGTCTCTCTACCTGGGGCCATCTGAAGTTTGGCTCCAAGGAGCAG  
AAGCAGGCGTGGGTACGCCTTCA

>1137

GGGAGTGAGGCTGGTGCCCTTAGGTTGTGTGGGTGGGGCGTGCCTGAGCCCTGGG  
TCTGTGTGGGCAGGGAACGGCAGTGATGCAGGAGCTGCGTCCACCACCGCCGGGCC  
GAGGGCGACTCATGGGTTCTGAATGG

>1138

TGTTGGGTGTGCTGGTGTGAGGGTGTGGCTGAGGGGCAGCTCTGAGAAAACCACCCG  
CCTCTCCTTTCAGGGCATCAGTGCCTTCTGGTCCCCATGCCAACGCCTGGGCTCACGT  
TGGGGAAGAAAGAAGACAAGCTGG

>1139

GTGGGGGTGGCACCTTGAGGCCAGGCCCGCGCCCCGGCTGGCGGGCCACTGACCAGG  
GCGGTCCCCACAGCAAACCCTGGACATGGGCCGATCGGCATCGCCTCCAGGCCCTG  
GGCATTGCCAGACCGCCCTCGATT

>1140

CCTCCTCCCCCTCCTTCTGTCCCTGGAGGGGCAGCTGCTGACCTGTGGTGTGGGGTG  
GGGCTATTGCAGTTCAAGTTGGCAGACATGGCCCTGGCCCTGGAGAGTGCCCGGCTGC

TGACCTGGCGCGCTGCCATGCTGA

>1141

CCAGCTGCCCCTTCTCCAGCTTTCCCCACGCCGGGTCTTCTCCCTCCTGAGCCACTGT  
TCTCATCTCAGGCCATCCAGATCCTGGGCGGCATGGGCTACGTGACAGAGATGCCGGC  
AGAGCGGCACTACCGCGACGCC

>1142

GGGCATCCTCACTGTCCTTGTAGTTCCTTGCTCATCCAGCCACCCATCCTGTCCCTTGCT  
CCAACCCAGTTTCTCCAGTTCGCGATGAAGATCATTAACTGAAGCTGGAGCGGTTT  
CAAGACCGCGTGGAGTTCTCAG

>1143

ACGGGTAGTGGGGTGATGGGGGAGGCCCTTTCCAGCCCTGGTGCTCAGTGGCTCTG  
CTTCTTTCCAGAGCCCCCTGAGCGGGACTCCACGGTGGCCGTGATTGTGGGTGCCTC  
CGTCGGGGGCTTCTGGCTGTGGT

>1144

GTTGGTTTGCTTATTCTTCTGGCTCTGATTTTTTCCCCTTTACTCTTTTTGTTTTGTTT  
GCATTTACAGGGTGAACTTCTACATCCGAGTTTATCCTGAGAGAAGCACCAGCTATGG  
CTACTACGGTCTCGGTCTG

>1145

ACTGGTGTCCACAGAGGACATGGTTAACTGGAATTCGTCAAGCCTCTGGTTCTAATTT  
CTCATTTGCAGGAAATGCTGGCATAGAGCAGCACTAAATGACACCACTAAAGAAACGA  
TCAGACAGATCTGGAATGTGAAG

>1146

GCTCAGTTAAGGGTGTCTGTGTCAGCAGAATAACCCTAACCTCACAGAATGGCCCACT  
TCTCTCTTAGGCCACATTCGTGGCTGACTGGCGGAACTCGAATCGCTACCCTGCTGT  
TATTCTTCTACGTCAATGCGT

>1147

CAGGGTGGGGAGACCAGGTAGAGGGAGTACAGAGTGACCGCCTCAAGTGACACCTCA  
CCTCTCTGCACAGCTCCAATGAGACTCTGTCTGCGTCATCATCTTTGTATCGTGTACT  
ACGCCCTGATGGCTGGTGTGGT

>1148

GACCTGGATGGGGTGAGTTTGAGGGAGGGGGCCAGTAACCCACCTTCTGTCCCACCCC  
TTCCTGCTGCAGGTGGATGGGGACTCTGTGAGTGGCATTGTTTTGTGGGCTACAAGA  
ACTACCGATAACCGTGCGGGCTTCG

>1149

CCCACTACCCATCCTTCCCAGCAGGGCAGCCTCACCCCTGCTAATGTCTGAGGTCCCC  
CTTCTGTTACAGGATCATGACTCTGTTCTCCATCAAGAGCAACCACCCCGGGCTGCTG  
AGTGAGAAGGCTGCCAGCAAGAT

>1150

ACTCTCTCCTCCCCACTGCTGCTGCGGGACTGGGCTTGGTAACGTCCTGCTCCTGCCCT  
GTCCTCCACAGGCATTTTTGGCTTCTGGCCTTTGGCTTTGTGCTATTACCTTCAGCTG  
CCTTCTACGACTTCTCAA

>1151

AGATCCTATCTCAAAAAAGAGAGAGGAAAAGAAAGAAAGCCTCACCTGTCTACGT  
TCCCTCACTGTAGATGTCAGGCCAATGTGACCATCGGGCTGCCACCAAGCAGCCCAT  
CCCTGACTGTGAGATCAAGAATCGC

>1152

TGGCCCTTCCCAAGATTTGATGGGAAGTGGCAGCTTCTTACGCTCCTTCCCTATCCCT  
TCTGCTCTCAGGTTGACTGGGCAGAGTGACGATGAGCCAAAGCGGATCAAGAAGAGC  
AAGATGATTGCCAAGGCCTTCTCT

>1153

ACTATGGGAGGCACTGCCAGGGACCGGGAAGTCACTATTCTTCTCCTTTCTTCCTTC  
CATTCCCACAGCGGGCTTGGCCTTTGACCTCAATGAGCCCTCAGCTGATGTCTCCTCTG  
CCTGGGCCAGCATGTCACCAA

>1154

CTCCCAGGGGAGCGGGGTGGCATGGACAGAGCCAGGGCCCCAGGCTCGTGTGTCT  
CTCCTCCTGTGAGTGTCCAGAGGAACAAGCCAACCTGTGGCTGGTTGAGGCAGAG  
ATCTCCCAGAGCTGCAGAAGCGCCT

>1155

TGCTTGGTAGTTTGGGGCACCTGGCTCTTCTCTTGAAGGTTGAATATAATGCTCGTG  
CTCTTTTACAGGTGGCCAGTGGCGATTCGATGCTTGCGTCCAAGTCTGTGAATGAAA  
ACCCCTCGTACCCATAGGTTT

>1156

TTGAGCAGCCATACACCAGTCACCTCCATACTACTGCCCATGCCCCATCCTCTCCTTC  
ATCCCGGCCAGGCTGATCATTGGCTTCATCAGCAAACAGTACGTTACTAGCCTTCTTCT  
CAATGAGCCCGACGGAACCTTT

>1157

CTTATGGTAGGGGTTGGGGAAAGGGGAAGAAATCCGGACAGAGGGATCTCAGGGTCTC  
CTTCTACCATAGGCTCTCCACAGATAGAGAACATCCAGCCATTCTCTGCCAAAGACCT  
GTCCATTCGCTCACTGGGGGACCG

>1158

TGCTTATCTGCAGGAAGGAGGGGTGGCATCAACCCTTGGTCAGTCACATGTACCTCCTT  
CCCTCCTCAGGGACCAACCACTTCCATCCCCAGAGCTCCAGATGCCTACCATGGTGC  
CTTCTTATGACCTTGAATGGCC

>1159

TGTTCAAAGCAGGGTGTGGTGGTGTCCAGGAGAAGGGCTGGCATCAGGGGGTCTGT  
TTTCTTTCCCAGGCCCCAGGTGTACCCACCACACTCTCACTCCATCCCCCGTATCAA  
GGCCTCTCCCAGAAGAATCAGTC

>1160

CCTGACCCATGTGCCTCTTCTTCTGGGCCTTGCCGCTCTCCTTATTTCCATTGCTGG  
TTCTTGGCAGGGCCTGCTGCCGTGCCAGCCTCAGGAGCATGCTGTGTCCAGCCCTGAC  
CCCCTGCTCTGCTCAGATGTGA

>1161

GTGGAGGCTGGGTGGCATCTAGGGGAGTGGGCGCCATGCCTACTCCACTGCTTCTCCC  
ATCTCCTTGAGGATTGGTGAAGACATATTCCCTCCTCTGCTGCCTCCCACTGAACAGG  
ACCTCACTAAGCTTCTCCTGGAG

>1162

TTCCGGCCCTTCCGAGGGCAGCTCCTGTGTGCTGAGGGCTCTGCTGCTCTGAGATGCCG  
CGTCCCTTCCAGACCTCACGCCACCATCTGGATTGGTTCTCGATCCCGTACCCAGC  
TACGCCATCTTTGGCTCGAAGAC

>1163

GAAGCACCTGCCCTCCCTGAGTTCAGTGTGTCCAGTGTCCCGGCCAGATGCTCATGC  
CATGCTTCGAGGGAGCGGGAACGCCGAGAGAAGGAGAGAGAAGAGTGGGAACGCC

AGTACAGCCGGCAGAGCCGCTCACCC

>1164

GCATCCACGGCCCCAGGTGTGTTGATGTGTGTATGCCCCATCCTCACGGCCCCCTCCCTT  
TCTCTTTCCAGGCGCTCAAGGTCCCGATCCCGAAGCCCCATTACCGACATTAGGCAG  
AAGAGTGGGGGGTGGGGAGGACA

>1165

CCTTTGCCATAGTCCCACCCACCTGCCGCAACACTGTGTGAGGCCTCTCCTGCCCGC  
TTCCCATGCAGAAGAAAATCATGATCATCATCTGCTGTGTGATCCTGGGCATCGTCATC  
GCCTCCACTGTTGGGGGCATCT

>1166

GCCTCAGCTTGTCTGCGTGGTGGGCAACCTGCGTGATCTGAGGGGATGGGTTCTTC  
TTGCTCTACAGGCTCTCCTTTGATAAAGATGCGATGGTGGCCAGAGCCAGGCGGCTC  
ATCGAGCTCTACAAGGAAGCTGGG

>1167

CGTACCCGCCCCCGCCTCACCCGTCCCCGCCCTCACCTGCCCCGCCCTCACCTGTC  
CCCGCCCCGAGGGAGCTCGAGGAGCAGCACGGCATCCACTGCAACATGACGTTACT  
CTTCTCCTTCGCCAGGCTGTGGCC

>1168

GGCACTGGGAGGGCAGGTGGGGTGGTACCTCTGCCGAAGCCTTCTGGTCACAGCTT  
GGTCTCTTTCCAGGGTAAAGAGTGTCACTAAAATCTACAATACTACAAGAAGTTTAG  
CTACAAAACCATTGTCATGGGCGCC

>1169

CCCTGAGCCCAAGGGGCCAAGGTGGGCAGGGACATGGAGCAGGCATGGAAGGCTGG  
TTCTTGTCAGCCCAAGCCAGTGACCTGGAAAAATCCACCTGGATGAGAAGTCT  
TTCCGTTGGTTGCACAACGAGGACCA

>1170

GTGCCCTGTGAGGCTTCAAGGTGCAGAAGGTAGGGTGGGGAGACACAGCTCGTGCTC  
TGTTTGTCTTAGGAACGAATGTTCAATGCAGAGAATGGAAAGTAGCGCATCCCTGAG  
GCTGGACTCCAGATCTGCACCGCCG

>1171

TGGCCACGTGGTCTGCCTGTCTCAGCACCCACCGGCTCACTCCCATGTGTCTCCCGTC  
TGCTTTCGAGAGCTCCTCCCTGAATGAGGCCAGCAGTGGCCTCTTCGACGTCTTCTA  
CGCTTCATGTGCCACCACGCCG

>1172

GGCTCGGTTTGAGTGACGCATGTCCAGCACATGCCCTGCCGTCTCTCACCTGTGTCT  
TCCCGCCCCAGGTCTACGTCCAGTGCCAGGGGATCCCGCAGGGCTCCATCCTCTCCA  
CGCTGCTCTGCAGCCTGTGCTAC

>1173

AGTCCCTCGTAGACAGATACTACGTAAAAAGTGAAAGTTAACCTTGCTGTGTATTTTC  
CCTATTTTAGGCTGCTCCTGCGTTTGGTGGATGATTCTTGTGGTGACACCTCACCTC  
ACCCACGCGAAAACCTTCTC

>1174

ACAAGGGTGTGAGGTTACCTCCTGGGTGACGGCCCCGCATCCTGGGGCTGACATTGCC  
CCTCTGCCTTAGGACCCTGGTCCGAGGTGTCCCTGAGTATGGCTGCGTGGTGAACCTG  
CGGAAGACAGTGGTGAACCTCCCT

>1175

AGCAAGCTTTGCAGGAGGGGGCTGGGTGTGGGGCAGGCACCTGTGTCTGACATTCCC  
CCCTGTGTCTCAGCTATGCCCGACCTCCATCAGAGCCAGTCTCACCTTCAACCGCGG  
CTTCAAGGCTGGGAGGAACATGCGT

>1176

CCATGCCCACACCCACGAGCACCGTCTGATTAGGAGGCCTTTCCTCTGACGCTGTCCG  
CCATCCTCTCAGGTTTCACGCATGTGTGCTGCAGCTCCCATTTTCATCAGCAAGTTTGA  
AGAACCCACATTTTTCTGCGC

>1177

AGCTTCCGGTGTCTCCTGGGAGGGGAGCTGGGCTGGGCCTGTGACTCCTCAGCCTCT  
GTTTTCCCCAGGGATGTGCTGGGGGCCAAGGGCGCCGCCCTCTGCCCTCCGA  
GGCCGTGCAGTGGCTGTGCCACCA

>1178

ACGTCCTAGGAGGGTTGGAGGATGCCACCTCTGGCCTTCTCTGGAACGGAGTCTGATT  
TTGGCCCCGAGCCCAGACGCAGCTGAGTCGGAAGCTCCCGGGGACGACGCTGACTG  
CCCTGGAGGCCGAGCCAACCCGGC

>1179

ACATTTTTTACATTACAATTATGTTGTCAGATTTACAATGTGCAAGTTACCTGGGCTTTT  
CTCTTTTAGAAATCCAAGGGGGAGAGTGATGACTTCCATATGGACTTTGACTCAGCTGT  
GGCTCCTCGGGCAAATCTG

>1180

TTCCTGTACAGTCCAGCCCCTCTCCACAGGATCTGCTTTAATCCAGCGCCTCTCCTC  
ATCTCTCCAGCCCAAGGCCACAGTCTCAGATACCTGTGAAGAAGTGAACCCAGCCT  
CCTTGAAATCCTCCCAAGTCCT

>1181

TCCTGCCATTGCCTTTCACCCCCGGCCTCCCCGCCCTCCCTGTTCTCTCCTCGTGG  
CCTGTTACCAGCCCACAGAGAGTCCAGCCGGCAGCCTGCCTTCCGGGGAGCCCAGCG  
CTGCCGAGGGCACCTTTGCTGTGT

>1182

GTGGCCTGTTTCTGTGTCCTGGCTGTGTCCTGTCTGTCTGACCCCAAGCCGGCAT  
TTATGTTGCAGCCAGCAGAGGCCTCGGAGGTGGCGGGTGGGACCCAACCTGCGGCTG  
GAGCCCAGGAGCCAGGGGAGACGG

>1183

TTCTCCTCGGTGGCCCTGGCTGTCCTTGGACCACCTTCCCTGCTCAGCTGACCCGTACC  
TCTGCCACCAGAGCTCTTCTCTGCTGTCGTGGTGGAGACCTTCCAGCAACTGTGAA  
TGGCACCGTGGAGGGCGGCTGTG

>1184

CAAGGCCCGTGTCTGTGCAGGGCTGGAGGTGGGACGGAAGGTCTGACTTGCGATCC  
GCATCCTCTGCAGGTACAGGCCACCACGACTACACGGCCACTGACACAGACGAGCT  
GCAGCTCAAGGCTGGTGTGATGTGGTGC

>1185

TTTGTCCCCTGCCACTTTGCTTCTAGACTATCATTATTGGACCTCTGAATTCTTGTCTGC  
CTTCTGTAGGAGCCCCATGGCACCTGCCAGCCCCACCTCAGCCCATCTTGACAAAAT  
CTAAGGCTCCATGGAGCCACC

>1186

CAGAAGGATGGGAACATCAGCTGCGCTTCTGTTGGGCATTGAGGACCCCTACATCTGC  
ACATACACAGGTGACTGTCCGGGATGGCATGAGTGTCTACGACTCTTAGACAAGG

CCCTGAAGGTGCGGGGTCTAAATC

>1187

TGTGGGGGTTCCCTGCCTCCCATGGCCCCTACCCAACCTCCCCTCATTCTTTCCAT  
GCCCCCTGCAGACGAAAGACGGTCACTGCCTGGGACACAGCCATTGCTCCCCTGGATG  
GCGAGGAGCTCATTGTCGAGGTC

>1188

ACGGTGGGGGTGGACCATGGTTGGGGGTGTCCTTGACCAGGTCTCAAACCTCCTGCT  
CTGTGGCATCAGGTACGGAAGACCTTCTCAGCCTGGCGTTCTGTGACTTCTGCCTTAA  
GTTTCTGTTCCATGGCTTCCGTT

>1189

GGCCAGCCACGAGGCCCTTACAGACAGCTGACCTGTGTCCCCTTGCTTTATACCCTTC  
ATGCCCTCAAGTTTACCACAGTGTCCAGGATTTGTCGGAGGCTCCAGACAGCATG  
AGGCTCCCTCGAACCGCCCCCTG

>1190

GGGGGTGGGGTGGGGGGCTTTCTCGTTCTCTGATTCTGGCAGTGATTTACAGCCT  
TCCCCTGGCAGCCCCCGACCCAGCACTGTACCCGGAGCACTTCCCCTTCCCTGCC  
CCAGCCAATGCCCCCTACAGCGC

>1191

GTCCCCTGTGCCTGCACCCTGACCCCGCTGCCCCACTTACCTCCACTCACATCCTCTC  
TGCAACTGCAGCTGCCGGTAGTAGAGGAGGTAGTGATGGAACCCCCGGGGAGCCC  
CAGCCCAGCCAGCGTCTCCTCGGG

>1192

CACCAAGGCTGAGTGACGTGGGATGAGGGATGTGGGCAGGCCTTTAGATGCCACCCA  
TCTCGCCACAGAAGAACCTGGGGTACCGGGACTCAGGCTATTACTGGGAGGTACCAC  
CCAGTGAGGTGCAGCTGCTGAAGA

>1193

TCCTGATGCTCGGTAAGTGACAGTTGCTATTTTTCTCCCCACCTCTGACACTGCCCTC  
CCTGCCTGCAGGAAGACGCGACATGTCAACATCTTGCTGTTTATGGGCTTCATGACCCG  
GCCGGGATTTGCCATCATACA

>1194

GGGATCTGGGACTGTGGACCAGCCATTTGCTGACCTCCGTGGTCCCCTGCCTGGTCT  
GGCCTGTTGTAGGCAGCTGAGGTGATCCGTATGCAGGACCCGAACCCCTACAGCTTCC  
AGTCAGACGTCTATGCCTACGGGG

>1195

ATACAAAATTCCTTGGGCCTCCAGCCCCTGACCCAGATACCCCTTTCTGCCCCCG  
TCTGCCCCAGATTATCTTTATGGTGGGCCGTGGCTATCTGTCCCCGGACCTCAGCAAA  
ATCTCCAGCAACTGCCCAAGG

>1196

CCATGAGGCTGGGGCTGTTGGGATGCCACAGCGGTCTGGACCCCCCTCCTCCCCCCC  
ACCTGCCCTCAGATCCTGGCCACAATTGAGCTGCTGCAACGGTCACTCCCCAAGATTG  
AGCGGAGTGCCTCGGAACCCTCT

>1197

GTGGCTAAGGACCTGGGTGAGGGAGAGAGCAGGGCAGGACCCCGAATGATCTCCAGC  
ATTCTGTGCCTAGCTGCTGATGCCTACAAGCCAGCCCCTGGCACCTGCTGCTACATCA  
TGAAGATAGCTCCAGAGAGCATCC

>1198



TTGCCTGATATACCTGAAGTCCCACAATAAGGGCTGCACATGGGATAGAACTCACTTC  
CTACATTCCAGATGGAATGCTCTCTGCAGGCCAAGCCCGCAGTGCCTACGTCTAAGCTG  
GGCCAGGCAGAGGGGCGAGATG

>1199

GAGGTGGGCGGGCAGGAGGCTAGGGAGGGCAAGAGGGGCCAGGGCTCTGAGCATA  
CTACCTCCTTGCAGAGCCGCCCCCAGGCCCTTCTGGACATGGGGGAGGGCACCAAG  
AACCGAATCATCACAGCCGAGGGGAT

>1200

CTGGGGGTGGCTGGGGCAGGGACCCCAGGTGTCAGGGTGCTGATGTTGCTGCCTC  
ATTTCCATCCCAGGGCCTGAACCTGGACACTGCTCCATGTATGAGGACATCTCCCGGG  
GCCTCCAGGGCACCTACCAGGATG

>1201

GTCTTTTACTTACATCTTTACTGCACGTTCCAAGCGTTGTGTGGCCTGACGAGTGTGT  
CTCTCTTCTAGTCGACATTACTCTGAAGGGACGCACAGTTATCGTGAAGGGCCCCAGA  
GGAACCCTGCGGAGGGACTTCAA

>1202

TCGGTAAAGTGGTCTGTTGTCTTTAAGCCTGCATATTTCTGAAAGAATACATTTTTTGT  
TCTGTTACAGCTCCGGGTTGACAAATGGTGGGGTAACAGAAAGGAAGTGGCTACCGTT  
CGGACTATTTGTAGTCATGTAC

>1203

TTAGAAAATTTTAAACTATTA AAAATATTCCTCAGCATTGCTAATAGCTTGCTTATTTAT  
TTAACATAGGGCTTCCGTTACAAGATGAGGTCTGTGTATGCTCACTTCCCCATCAACGT  
TGTTATCCAGGAGAATGGGT

>1204

TTAGTGCCTCTGCAATTTAAATATTTTTTACACAGATTTGATGCTGTGCAAATGCCCTCT  
CCCCTTTTAGGTGTTGCTTGTTCAGTATCTCAAGCCCAGAAAGATGAATTAATCCTTGA  
AGGAAATGACATTGAGCTTGT

>1205

CATAATGAAATACTTCCTTTTTAAGATGGGTAGGCTGATGTATTAATTGCTTTATCTTCA  
CTCCTATAGCGGCTTTGATTCAGCAAGCCACAACAGTTAAAAACAAGGATATCAGGAA  
ATTTTTGGATGGTATCTATGT

>1206

AAAAAAGATTAGTACTTTCTGGGCAAGTGTATTGATGGGGATTACAGATTTTTTTTCT  
TTTTTTACAGTTACCTGGCTACAGAAAGAAGATGCCAGATGACACTTAAGACCTACTTG  
TGATATTTAAATGATGCAATA

>1207

TTGGCCTTTGTTAGAACCTCCAGGGTGTGGTTCTCAGCTGTGGCCACTTACACCCTCCC  
TCTCTCCCAGGCCTGTGGGTCCCATCGCCAAGTCTGCCACACTCCCACCTGCTA  
CCCTGATCAGAGTCATCATGCC

>1208

TAGGCCTTTGTTAGATTCTCCATGGTTCATATCTCATCTGAGTCTGTTCTCACGCTCCCT  
CTCTCCCAGGCTGTGGGGCCCCATCACCAGATATTTCCACAGTTCGGCCTGCTGAC  
CTAACCCAGAGTCATCATGCCT

>1209

CCTCCACCGACCTCACTCCTCCCACCCCCATCCACGCTGAATCGGGTTCTGCTCCGCT  
TTCAACCCAAGAAAGCCGCAGGTGCCGGAATGTGATGCCACTGACTTGCGCATTGGGG

GTTAGAGAAAAGCGAGCTGCTCT

>1210

CATCAATCCTGCAGAATCGACCTCTGCTGGCCGGCTATACCCTGAGGTGCTCTCTCACT  
TCCTCCTTCAGGTTCTGAGCAGACAGGCCAACCGGAGGACAGGATTCCCTGGAGGCC  
ACAGAGGAGCACCAAGGAGAAGAT

>1211

TAAGCCTTTGTTAGAGCCTCTAAGATTTGGTTCTCAGCTGAGGTCTCTCACATGCTCCC  
TCTCTCCGTAGGCCTGTGGGTCCCATTGCCAGCTTTTGCCTGCACTCTTGCCTGCTG  
CCCTGACCAGAGTCATCATGTC

>1212

TAAGCCTTTGTTAGAGCCTCTAAGATTTGGTTCTCAGCTGAGGTCTCTCACATGCTCCC  
TCTCTCCGTAGGCCTGTGGGTCCCATTGCCAGCTTTTGCCTGCACTCTTGCCTGCTG  
CCCTGAGCAGAGTCATCATGTC

>1213

CTGTCAGTCCTGCAGAATCAGCCTCTGCTTGCTTGTGTACCCTGAGGTGCCCTCTCACT  
TTTTCTTCAGGTTCTCAGGGGACAGGCTGACCAGGATCACCAGGAAGCTCCAGAGGA  
TCCCAGGAGGCCCTAGAGGAGC

>1214

TAAGCCTTTGTTAGAGCCTCCAAGGTTCAAGTTTGTAGCTGAGGCTTCTCACATGCTCCC  
TCTCTCTCCAGGCCAGTGGGTCTCCATTGCCAGCTCCTGCCACACTCCTGCCTGTTG  
CGGTGACCAGAGTCGTCATGTC

>1215

CTTTGTTAGAGCCTCCAAGGTTCCATTCACTACTCAGCTGAGGTCTCTCACATGCTCCC  
TCTCTCCCAGGCCAGTGGGTCTCCATTGCCAGCTCCTGCCACACTCCCCTGCTGTTG  
CCCTGACCAGAGTCATCATGCC

>1216

TAGGCCTTTGTTAGGGCCTCCAGGGCGTGGTTCACAAATGAGGCCCTCACAAGCTCC  
TTCTCTCCCAGATCTGTGGGTCTCCATCGCCAGCTGCTGCCCGCACTCCAGCC  
TGCTGCCCTGACCAGAGTCATCA

>1217

TAGACCTTTGTTAGGGCATCCAGGGTGTAGTACCCAGCTGAGGCCTCTCACACGCTTCC  
TCTCTCCCAGGCCTGTGGGTCTCAATTGCCAGCTCCGGCCCACTCTCCTGCTGCC  
CTGACCTGAGTCATCATGCTTC

>1218

TCAGCCTTTGTTAGAACCTCCAAGGTTGTTTCTCAGCTGAAGTCTCTCACACACTCCC  
TCTCTCCCAGGCCTGTGGGTCTCCATCGCCAGCTCCTGCCACGCTCCTGACTGCTG  
CCCTGACCAGAGTCATCATGTC

>1219

CTCACATCATTGATGAGAATGCCTTGAATCCGAGCTACTAAATCACATTCCTTCCTTCT  
AACCTTCCAGTTAGATCAAACCATTGCTGAAACTGAAGAGGACATGTCAAATATTACA  
GATCCACAGATGTGGGATTTTG

>1220

GGGGCTGTGACTAGGATCGGGGGACGCCCAAGCTCAGTGCCCTCCCTGAGCCATGC  
CTCCCCAACAGCTATACGGGCAGCTCCCCAAGTTCCAGGACGGAGACCTCACCTGT  
ACCAGTCCAATACCATCCTGCGTC

>1221

GGCCCATCCCCAGTGACTGTGTTGATCAGGCGCCCAGTCACGCGCCTGCTCCCCTCC  
ACCCAACCCAGGGCTCTATGGGAAGGACCAGCAGGAGGCAGCCCTGGTGGACATGG  
TGAATGACGGCGTGGAGGACCTCCG

>1222

TGGGGCAGACGGGGGTGTCTCAGGGGCTGGGAGGGATGAGAGTAGGATGATACATGG  
TGTGTGCTGGCAGGAGGCGGGCAAGGATGACTATGTGAAGGCACTGCCCGGGCAACT  
GAAGCCTTTTGAGACCCTGCTGTCCC

>1223

AGGCCCTCTGCCCCAATTCCTCTCCAGCCTGCTCCCGCTGGCTGAGTCCCTAGCCCC  
CTGCCCTGCAGATCTCCTTCGCTGACTACAACCTGCTGGACTTGCTGCTGATCCATGAG  
GTCCTAGCCCCTGGCTGCCTGG

>1224

CTCCCCAGCAACACAAATGTCCTGCCAGATTCTCCTGGAAAAAACTTCTGCTCCT  
GTCCCCCTCCAGGTCCCAGGTTGCCATGTCCAGGAAAAGATGGATCCCCCTATCCAAA  
TCTTCTCCGTGGTGTGTGGGT

>1225

GAAATGGGATAGATTGGAGGTCCTGTTGACCTCCATGCTTATCACTTCAGTTCTTCTCT  
TGGCTCTTAGTTGGATCGAAGCCTCTAAAATGGCAGATGACTTGGACTTCGAGACAG  
GAGATGCAGGGGCCTCAGCCAC

>1226

GTCAATTTGAGCCTTTATTTCTCCGTTTTAGAGTTTGGTTGGGTTTCTCTTTGTGATGC  
ATACATACAGGTCCATCTGGTTGGATTGACATCTTTACTGGGAAGAAATATGAAGATAT  
CTGCCCGTCAACTCATAATA

>1227

CAGAGCCTTACTGTCATGTCAGCCTCCCTGGGCCTACTACCTTCAGCCTCCTCCCTAT  
CTGCCCCAGCTGATTGGCATCCAGGATGGGTACCTATCACTGCTCCAGGACAGCGGG  
GAGGTACGAGAGGACCTTCGTC

>1228

TGCTCAGCTTTGTTCTGTACGTTTCTCCTGAGCTCAGACATCTTTGGCTATCCCTCTT  
GCTTCTCCAGATCACGGTGTCTGTGCCATGACAGAGGAGGCAGCTGTTGCAATCAAG  
GCCATGGCAAATAACTGGCTC

>1229

TGGCTCTGTCTCCCTATCCTCCTGTTGAAGGTATTATCCTGTCTTACTAATTTCTCTCT  
CCTACCTAGGATGGCGGTGGTGGCAGCAGTGATCCTCTGAACCTGCAGAGGCCCCCTC  
CCCCAGCCTGGCCTGGCTCTG

>1230

CTCTACGCGTGGGGAAGTTTCTGGCAGCCTGAAGTGTACACCTGACGCCTGCACTCC  
CTCCCTATGCAGGGTGCAAATCCGGCCCGATGAACGCGAGCGCCGCTCGCTCAACG  
ACTCCAGGTGGTGGTAGTGGCGG

>1231

GAACAATCATGAAACTATGGATGATTTAGTCCAGCAAATATCCAATTGGGAACCCCTCA  
TCCTTCTGCAGAGCCCAATGGCGCAGTGGGAAATGCTGCAGAATCTTGACAGCCCCT  
TTCAGGATCAGCTGCACCAGCTT

>1232

AAGGGGTTGGAAAGCCTCAGGACTACAGTAACACTGCAGAGACACTAATACTTCTTAT  
TCCTGGTCCCAGGCAGGAAGCTGCACTTGGGAGTGATGATTCCAAGGCTACCATGCTA

TTCTTCCACTTCTTGGATCAGCTG

>1233

AGGGTCTAGGGCAATAGGTCATTGAGAGTGGTTGAATTGGATCAATCCTTTCTGTTTAC  
CTTTCTGTTAGCCCTTTTCCAGGATCCTACCCAGTTGGCTGAGATGATCTTTAACCTCC  
TTCTGGAAGAAAAAGAATTT

>1234

TATAATTCAGGCCTGAACTTAAGGCATGAAAGGCCAGAGTTAAAACGTGCTCAGAGC  
CTCTTTTTTCAGGAACAAGGAGAGCCAGTTCTCGAAACACCTGTGGAGAGCCAGCAA  
CATGAGATTGAATCCCGGATCCTGG

>1235

TAGGGTTGACAGTGTTTCAGCCTAACACCTCCCTGAGAAGCAGCCTCATCGGGGTCTC  
TCCCTCTGCAGAAGCTGGTAAAATCCATCAGCCAAGTAAAGACCAGCAGGATGTCT  
TCTGCTTCCGATATAAGATCCAGG

>1236

CTCTGACTGAGACCCAGTCAGGAAGGAGAGGAAAGAACCCCTGGACTGACTCCTGT  
TCCCACCATCCAGGGAAGACACCCTCTCTGGACCCCATCAGACCAAAGAGCAGAAG  
ATTCTGCAGGAAACTCTCAATGAACT

>1237

CTTCATCCCCAGTTGGGTGGTGGAGGGTGAAAGGGAGAGATGCTCAACTCACATTA  
TCTCTTTCCAGGAGGTGCTGGATGCCTCAAAGCACTGCTAGGCCGATTAACCTACCT  
AATCGAGCTACTGCTGCCAAAGT

>1238

AGATCTTGGAACCTGGATGGGGGAATCCAGGAAACTCATGGATTCCTTCTTCTGAATT  
TTATACCCAGGTTACAGCTGGAGCAAAGCTGTTGTTTACCTGAGGCAGCTGCTGA  
AGGAGCTGAAGGGACTGAGTTGC

>1239

TTTTTTTTTTCTGCTGAGTTTTTACAATAATTCCATTCTTGTCTCCATGTATCTTCTCC  
TGGAACAGCTTCCGGAAGTTCAACATTCTGACTTCAAACCAGAAAACCTTGACCCCG  
AGAAGGGGCAGAGTCAGGGT

>1240

ACAGAGGACTCGAGGCAGGGGGAGCTTGCCAAAGAGCCTTCTGATGACTATGTCTTTG  
CCTGTCCAGAGGGGCCACTAGGTGTGACAGAGGAACTGCACATCATCAGCTTCACGG  
TCAAATATACCTACCAGGGTCTGA

>1241

GAGCAGGGGTGTGGAAGCTTGGTGTGATAGGTTGCTTCTGAGCCAGCCTACACTGCTC  
CCACCCCTGCAGAACCAGCAGTTCTTCTCCAACCCCCCAAGGCCCTGGAGCTTGC  
TGGGCCCTGCTCTCAGTTGGCAGT

>1242

CTTCCACGTGCCCTCTTCCCTACACCAGAGGCAACTCCTCAGCTTTTGCTACCTTTC  
CATTCTCCAGCGAGAGAGCCCTCCTGGCAAGTTACCATTCTGGACATGGCTGGACAA  
AATTCTGGAGTTGGTACATGACC

>1243

GGAGCAGGGAGGCAGGGGCCTGGGGGGCAGGGTGTGGGCGGTGTCACACGTGAC  
ACACTGTGCTCCAGACGCATCATGGGCTTTGTGAGTCGGAGCCAGGAGCGCCGGCTGC  
TGAAGAAGACCATGTCTGGCACCTTT

>1244

CAGAGAGTCAGAGAGCTCCAAGGCCCGCCTCTCCCTCAAGCCCGCCTGTTCTGCA  
TTCCTCTCCAGACAAGGTGCTCATCTACTCTGTGCAACCGTACACGAAGGAGGTGCT  
GCAGTCACTCCCGCTGACTGAAAT

>1245

TCCCTTGGGCTGCTGGGTTGGAACTCCTAACTAAGATCGGGGCCTCACTTTTCTCTCT  
GGATTACCTAGTCTTCAGAACTGTGTAAGATTGAAGAAATCATGCCGAATGGTGAC  
CCACTGTTGGCTGGCCAGAACAC

>1246

GTATCCCAAGTATAAGGAGGTTCTTGTAAGTGAATGCCTCTTTTTCCCTTTCTTTTT  
TATATTCAGAATAGCTGCAATCTCCATGGCCTCTAAGATAACAGACATGCAGCTTGGA  
GGTTCAGTGGAGATCAGCAAG

>1247

AAACATTTAATAGAGAATAAAAAGAAAAGAACTTTCAGTGGTTAATGCTGTACTTTTA  
ATATTTCAAAGATCTGACTGCAGCCATGAGCAGCAATGAGTGCTTCAAGTGTGGACGA  
TCTGGCCACTGGGCCCGGAATG

>1248

AAGTACTTCAGTATTTGTTAGTATCAAGACTGGTCTGACTAGCCGAATTCTTTGTTTTG  
CTCAAACAGGTTTCAGTTTGTTCCTCGTCTCTCCAGATATTTGTATCGCTGTGGT  
GAGTCTGGTCATCTTGCCAA

>1249

ATAAGTTAAAACGTAACACTTTGTAAAGGTATTATAGTACATGGCCTGTTTCTTTCCCT  
ATTGTTGAAGCCTGCTATAACTGCGGTAGAGGTGGCCACATTGCCAAGGACTGCAAGG  
AGCCCAAGAGAGAGCGAGAGCA

>1250

ATGGTGAAGTGTGCTTTGGTAGACAGTTTTTCTGAGGCCATTGTGAAAACCTTTAAT  
TTCTTTTTTAGGTGTGGTGAAGTGGTCAAGTCAAGTCAAGTCAAGTCAAGTCAAGTCA  
AAGTCAACTGTTACCGCTGTGGC

>1251

ATGGCGCGGAAAACAGGGGTGGCCTGGCTCGGCCTGGCCCCGGCCGACGCTGTGCGT  
TTGTGCTTACAGTCTCCGCTTATGGGCCCGGCGAGCGGCATGAACATGAGCGGCA  
TGGGCGGCCTGGGCTCGCTGGGGGA

>1252

CAGAGAAGACTCTTGGGTTTCTGATAGGCACTGACTCTCTGCCTATTGGTCTATTTTC  
CCACCCTTAGGCTGCTGGTGGTCTACCTTGGACAGAGTTCTTTGAGTCTTTGGGGA  
TCTGTCCACTCCTGATGCTGT

>1253

GCTGGAAGTGCACCTGGGCTGGGCTCGCAGCAAGGCGCAACTTCAGGCTCCGAAG  
CGGTGTGTTGAGATCGAAGCGCTGCAAGAAGTCTTGAAGAAGCTCAAGAGTAAACG  
TGTTCCATCTATGAGAAGAAGTATG

>1254

GACTGTGAGACTTGCCTGTTGGGAACCTGGGTTTGTTCATACTCGATGACCACACATTT  
TGTTGTTTCAAGTGTGACCGGTGAGCAGTGTGAGTGTGAGGAAAGGGCAAGGATCG  
GGAAGCTGTGTGACTGTCCCCGAG

>1255

GCATGTGGAATATTCTGGCTGTGCTGGCTGTGCTGGCTGTGGACTGAGTCTCTGTCTT  
CCCCATCCAGTGTGACCCCTGGAGGAAGAATGCCTGCTGTTCTACCAACACCAGCCA

GGAAGCCATAAGGATGTTTCCT  
>1256  
CAGTTCTATTCGGGGCTGAGTTGCTGGGATTCTTGAACCTGAGCCCTTCTTTGTATCA  
AAATCACCCAGGTGGATCAGAGCTGGCGCAAAGAGCGGGTACTGAACGTGCCCTGT  
GCAAAGAGGACTGTGAGCAATGGT  
>1257  
AGTTGTAGGGCTGGCAGACCTCAAGATAGTTCCGGGCCAGTGGCTAAAGGTCTCCC  
TCCTCTACAGGGTTTAAACAAGTGCAGTGGGAGCTGCCTGCCAACCTTCCATTTC  
TACTTCCCCACCCACTGTTCT  
>1258  
GCAGGGCGGATACTGGAGGGGGCTTGTGGCATCTGACTCTGTATCTCTACCTGCCCCT  
CTCCTTGGTAGCTGTGAGAAGTCACTGCTTTGGGGAGACCTGATCTGGCTGTGCCAGA  
TGGACACTGAGAAAGAAGTAGAA  
>1259  
GAGAGAATCCCACTTTCTTGCTGTTGTGATGGTGGTAAGGGAACGGGCCTGGCTCTGG  
CCCCTGATGCAGGAACATGGAGCTGATCCAGGACACCTCCCGCCGCCACTGGAGTAC  
GTGAAGGGGGTCCCGCTCATCAAG  
>1260  
GGCAGTCCCCACCTTGGTCAGCAAGGTCGTGCCCTCAGCCTGCTCACCTCCTATCTCCC  
TCCCTCTCAGGCACCACCTGGGTGAGCCAGATACTGGACATGATCTACCAGGGCGGC  
GACCTAGAGAAGTGTAAACGGGC  
>1261  
GGGTAAGGGAAGTGGAGGAAGACAGGGCTGGGGCTTACGCTCACCAGACCTTCCCTG  
ACCCACTACTCAGGGCTGGAGACTCTGAAAGACACACCGCCCCACGGCTCATCAAG  
TCACACCTGCCCTGGCTCTGCTCCC  
>1262  
TCAACAGATGAGCTGGCCTGGGGTGGGCTGTGTGGTGATGGTGCTGGGGCTGGGTCTC  
CTGCCCTGCAGGTGGTCTATGTTGCCGAAACCCAAAGGACGTGGCGGTCTCCTACT  
ACCATTTCCACCGTATGGAAAAGG  
>1263  
TGTGAAGCCGAGGGGTGGTGGCTATAACGTACAGCAACCCTGTGTCGGTGCCCCCTGC  
CCGCTTCTAGTGTCTACGGTCTGGTACCAGCACGTGCAGGAGTGGTGGGAGCT  
GAGCCGCACCCACCTGTTCTCTA  
>1264  
AGATCCCCTCTGAGGTTAGAGAGGGGGACCCGTTTTGTTTTGCTCCACTGAGGAGCCC  
TCTGCTGCTCAGAACCCAAAAGGGAGATTCAAAGATCCTGGAGTTTGTGGGGCGCT  
CCCTGCCAGAGGAGACCATGGACT  
>1265  
CCTCCCCATAGGCACTTGGGGCTCCCCTGGGATGAGACTCCAGCTTTGCTCCCTGCCT  
TCCTCCCCAGGCATGGCTGGGGACTGGAAGACCACCTTACCCTGGCGCAGAATGA  
GCGCTTCGATGCGGACTATGCGGA  
>1266  
AAATGCTAATGATTCAAGGATGCCTCAGCTCTGTATGTGTTCTAAGAGTTCTATGTTTT  
TTCTCCACAGAAGGCATAAGAAGTAGGAGCTGCTGACATTTCAATATGAAGGGCAACT  
CCACCCTTGCCACTACTAGCAA  
>1267

GGAGGCTGGGTTGGTGTGACGCTCTGACCTCTTCCGGTGCTGACCTCTCCTTATCGCTA  
CCTGAATACAGACAAGGACGAGGGTGACCACCCCAACAACAGCTTCAGCCCCTGTAG  
CGCCCATGACCGCAGGTGCCTGCA

>1268

CTCTGACCCAGGCTGGGCTCCTGCCTCTTCTTCTGCTGAGCAATTTGTCTTC  
CCCTCCTCAGCCCCAGGGCTCCTGCCAGAGCGAGCTGCACCGGGCGCTGGAGCGGC  
TGGCCGCTTACAGAGCCGCACCC

>1269

TGGACTCAGCTCTGGGGCATGGTCTCTTTTCTGCGTCGGAAGTACCCCTCATGTCTT  
TCTTTGGCAGTGTACCCAGCTCTGGATGGGCAGCGTGGCAAGTGTGGTGTGTGGA  
CCGGAAGACGGGGGTGAAGCTTC

>1270

ACATCTCGGTGCTGGGCCCCATTAGAGTGGAGGGTTCTCCCTCTAACCACTCCCACC  
CACCTCCATCAGATCAGTGAGCGCTATGGCCCCGTGTTACCATTCACTTGGGGCCCCG  
GCGGGTCGTGGTGTGTGGAC

>1271

GGAGCTAATGCCGTGAAGCTATGTGCATCTCTGTCTGGCCGTACCTGGGTAATAACC  
TGATCGACTAGGCGTGGTATTAGCAACGGGGAGCGCGCCAAGCAGCTCCTGCGCTTT  
GCCATCGCCACCCTGAGGGACTT

>1272

GGAATTCTGACTCTCCTCAGACCTCTGAGTTGACTCTCTCCCAACCCCTTCTCCCGA  
CATACCCGGAGGCGCAATATCGATCCACCTTCTCCTGAGCCGCACAGTCTCCAATG  
TCATCAGCTCCATTGTCTTTGG

>1273

ATCCCATTCCCATCAGCTCCTGCCCCGTGACAGCTGTCTTCCCTCCCATCCTCTCTCT  
GCAACCCAGCTCTATGAGATGTTCTTCTCGGTGATGAAACACCTGCCAGGACCGCAG  
CAACAGGCCTTTCAGTTGCTGC

>1274

GGTGAACCCCTAGATGGTGCCTGAGGTCAAGCAGGAGTGAGGTTGTCCTAAAGCCC  
CCTCTCCCTCAGGAGGAGAAGAACCCCAACACGGAGTTCTACTGAAGAACCTGATG  
ATGAGCACGTTGAACCTCTTATTG

>1275

GCCTATCCGGACTATCATTTCTGCTCTGAGACCCCTAGATACCTAAACACATTCCCCCT  
CCTCCCCAGCCAAGGTCCATGAGGAGATTGACAGAGTGATCGGCAAGAACCGGCAG  
CCCAAGTTTGAGGACCGGGCCAA

>1276

TCCAGCCCCTGTGACTCTCAACAATCCCCAACCCGCCTATCACATACACCTTCTC  
CTCCCTCCAGGGCATAGAAGTGTCCCTATGTTGGGCTCCGTGCTGAGAGACCTCAG  
GTTCTTCTCAACCCCGGGACT

>1277

AGGTCGGTACTGGGGCGAGGCTGCACTGAGAGTGGGCTTACCTCCACCCCTCCCGCC  
TCTCCTCCTCAGGAAAGCGGAAGTGTTCGGAGAAGGCCTGGCCAGAATGGAGCTCTT  
TCTCTTCTCACCCCGTCATGCA

>1278

GATATCTCAGCGCTGGGCCCATTAGAGTGGGGGCTGCTCCCTCTAACCACTCCCACCT  
GCCTCCAACAGATCAGTGAGCGCTATGGCCCTGTGTTACCATTCACTTGGGGCCCCG

GCGGGTCGTGGTGCTGTGCGGAC

>1279

CCTTGAACTGGTCCGCTCCTGCTACCACCACCCCTGACCTCTCTCCACCCCGCGTT  
CACCTCCCAGGCGTGGCGTTCAGCAACGGGGAGCGCGCAAGCAGCTCCGGCGGCTT  
CTCCATCGCCACCCTAAGGGGTTT

>1280

GAATTCTGACTCTCCTCAGACCTCTGAGTTGACTCTCTCCCAACCCCTTCTCCCGC  
CACACCTGTAGGCGCCAATATCGATCCACCTTCTTCTGAGCCGCACAGTCTCCAATG  
TCATCAGCTCCATTGTCTTTGG

>1281

TCCCCATTCCCATCAGCTCCTGCCCGTGACAGCTGTCCTTCCCTTCCCATCCTCTCTCT  
GCAACCCAGCTCTATGAGATGTTCTTTCGGTGATGAAACACCTGCCAGGACCACAG  
CAACAGGCCTTTAAGGAGCTGC

>1282

AAGGAAAAGCCCTAGAAGGGCCCAAGAGCATGGAGAGTGAGCTTGGTCTAAACCGC  
CCTCTCCCTGCAGGAGGAGAAGAACCCCAACACAGAGTTCTACTTGAAGAACCTGGT  
GATGACCACCCTGAACCTCTTCTTTG

>1283

CTAGGGGGGGCGATACATGCCCTGCTCTAAGACCCCTAGAGAGGGTAAAGATATTCCC  
CTCCTCCGCCAGCCAAGGTCCATGAGGAGATTGACAGAGTGATCGGCAAGAACCGGC  
AGCCCAAGTTTGAGGACCGGGCCAA

>1284

GGAGCCCCTGTGTACTTTACCAATCCCCCAACCTGGCTCATAACACACACCTTCTC  
CTCCCTCCCAGGGCACTGAAGTGTCCCTATGCTGGGCTCCGAGCTGAGAGACCCAG  
GTTCTTCTCAACCCCAAGGACT

>1285

GGGGTCAGTAGGGGTTGAGGCTGCACTGAGAGTGGGCTTACCTTACCCCTCCTGCC  
TCTCCTCCTCAGGAAAGCGTACTGTTTTGGAGAAGGCCTGGCCAGAATGGAGCTCTT  
TCTTCTTACCACCATCATGCA

>1286

GCCATAGGGTGGCAAGGTCTAGGCCTTCTCAGATTTCCGGTGACCCTTGTGTCTCTCTC  
ACTTCTTACAGAAATGCACGTGGCCGCTCCTCGGAAGTACCCAGTGAGCGCTCCATGG  
CTCCCCCTGCAGTTGGGGCGGGG

>1287

GGGCCCCAGGGGCCAGGCCTGCACCACAGCCCTCACTTCTGACCCCTGCTGTCCCTG  
TGCTGTCTCAGGAGACCTCCAGTCGGAACCTGGTGACCCTGCGTGTGGACCCCAATG  
GCTTCTTCTTGTACTGGACGGGCC

>1288

GCCTGGGAGTGAAGACCACAGCGAGACTGTGCGGGAGCCCCCTTACCCCTTCGCT  
GTCACCTACTCAGGACCCCAAGATCCGGGAAGTTCTGGGCTTGGGGGTCCCGATGCC  
CGGCTGGAGGAGAAGCTGATGACGG

>1289

GACCTGGGTTGTGGCTGGGCAGCCCCTGTGTCCCCACTCACCGCCTCCCGTGTATA  
CTGGCCCCCAGGTCTGGTCTGAGGAGCTATTCAAGCTGGCTATGAACATCCTGGCTC  
AGAACGCCTCCCGAACACCTTCC

>1290



ACCTTCCTCCTGCCCTGACCTTGGTGACCTTTGTCCTCCACTGACCCTGAACCCCTCCT  
GCCCCATCAGCATCCTGAAGATGTTCTCAGCAGACAAGAAGCGGGTGGAGACTGCG  
CTGGAATCCTGTGGCCTCAAATC

>1291

TCACGGTGGACACCCACCTTACGGGGGTGCCCCCCCCTGGTTTCTACCCCACTC  
CTCGACCTCCAGAGTGAGTCCATCCGGCCTGATGAGTTTTCTTGAAATCTTTGAGCG  
GTTCTGAACAAGCTGTGTCTGC

>1292

GGCAAGGGCTTGGCGACGGGGTGGGAGCCCTGCCAGGCTCCATCCTGACCCAGCTTC  
CTGTCCCCTCCAGAGGCGCCAAGGGCAAGCCATACCTGACGCTGGAGCAGCTCATGG  
ACTTCATCAACCAGAAGCAACGCGAC

>1293

CTGGCTGGGGTGCAGGTGGGTGGGGCAGGTGGGACACCAGCTGACCCTGCTGATCC  
TCTCCACCCCAGACCAGATGTCCATGGAGGGCTTAGCCGCTACCTGGGAGGCGAGG  
AGAATGGCATCCTGCCCTGGAAGC

>1294

CCAGGTGGGACCGGGGTGGTGAGGAGCTGGGCTGGTGGGCGGCCTCGGTGACAGAG  
CCTCGCCGCCCAGCGGGGACAGCTGGCTGGGACCTCGTCGGTGGAGATGTACCGCCA  
GGCACTACTATGGGGCTGCCGCTGCGT

>1295

TGACATGTCCCGTAGACCTCAGCTTCTCTCTGGGGGAGGGATCTCTGACCTCTGACCT  
CGGTTCCGACGGGCAAAGCAACAGGCAAAGATGGCTGAGTACTGCCGCTCCATCTTG  
GAGACGCGCTACTCATCGACCT

>1296

AGGGGGGTGGCATGGGGGCCAGGGTGTGCGGACCCGGTCCAGGGCCCTGACTCGTC  
CATGCCTGCCAGCTGGCCCCAGGCGTTCCCCTGCCAGCCCCCAGGACCTGATGGGC  
CGTATCCTGGTGAAGAACAAGAAGC

>1297

AAAACCCCTCCAGACTTCTAAGCAGCTGTGTGGTCTGACCCCTCACCTGTGGCCC  
TGTCTCTGCAGGGTCTCCAGCTCTGACAGCTGCCAGGCTGAGCAATGGGGAGG  
AGGTAGGGCTTGAGAAGCCCAGCCT

>1298

TGGGGGGCAGGTGAGGGAATGGCCAGCTGTGGCGGAATGGCACTGCTGACCCTGGG  
TTGGGGCCACAGGGCACAGCCAGCAGCGAGGTGAATGCCACTGAGGAGATGTCCAC  
GCTTGCAACTACATCGAACCTGTCA

>1299

GTGGCAGGCATGGGAGCTTGCCCAGCTCAGCCCTGCCAGGCTGACGCCCTTTCTTGG  
CTACCCCTAAGAGAGGAACAAATGCTTCGAGATGTCGTCCTTTGTGGAGACCAAGGC  
CATGGAGCAACTGACCAAGAGCCC

>1300

GCTGAGGCCGGAGGTGGAGGCTGATGGGGTGGGCCCTGGCACCTGTGTGGCCCTGA  
CCACCAATCTCAGATAACAAGCAGCAGCTCAGCCGCATCTACCCAAGGGCACCCG  
CGTGGACTCCTCAACTACATGCCC

>1301

TCTCCATTCCCACATGGCACCGTCTGCCTGATCCCTGCCCTGCTCGACGTGCCCG  
TGGCACCCAGATGTGGCGATGCAGCTCAACGCGGGCGTTTTTGTAGTACAACGGGCGC

AGCGGGTACCTGCTCAAGCCGGA

>1302

GGCTCAGGCCAGGGGTGTCCTGGGGGCAGGACTCTCAGCATCCGCCTCACCTCCTTG  
GCCCCCCCCAGGTGATCTCAGGGCAGTTCCTGTCCGACAGGAAGGTGGGCATCTACG  
TGGAGGTGGACATGTTTGGCCTCC

>1303

GTTAGCTGTGGCCTGGTAGCCACAGTGGCCCAGGGTCAGCCCTGCGGCTCAGCTCCAG  
TCTGGCCACAGGTGGTGTGCCCACGCTGGCTTCACTTCGATTGCAGCCTTTGAGG  
AGGGGGGTAAATTCGTAGGGCACC

>1304

CAGCACAGCGGGCAGTGGGTAGGGCCCCACCTGGCCCAGCAACCCAACGTTGCCTT  
CCTGACCACCCAGGATACCACTACGTCTGCCTGCGGAACGAGGCCAACCAACCGCTGT  
GCCTGCCGGCCCTGCTCATCTACAC

>1305

ACCAGAGGTGGCGGGTGGGGTGGCCTGGGGGCTGTCTCTGAGACCTTGGCCTTC  
TGCTCCCCCAGACTATGCGGAGGCCCTGATCAACCCATTAAGCACGTCAGCCTGAT  
GGACCAGAGGGCCCCGGCAGCTGGC

>1306

GTGGTAGAGGACAGAAGGGTCTGGAGGGAACAGCATTCTCTGAAAAGAGCATTCTCC  
TTTCTCCCTATAGGCTCAGGCTGGCCAAGAGACGTGCCAGGACACCCAGTCTCAGCAG  
CTGGGGTCTCAGCCGTCCTCAAACC

>1307

GTACCTGGAGGCAGGGGGTTGCCTTGAGGTTCCCCACCCCCGCCACCTTTGGTC  
TGCCGCTCCAGAGGTGGCCCCACCCGCTGGATGAGCTCCGAGGTACAAGGCTCT  
GGTCAAGCTCCGAGCCGGCAAGA

>1308

CCCTACACACCCTCCCCATCCCAGTCCATGTGACGGGCCAGGCATCACCCAGAGGGG  
TTCTCCTCGCAGAGGTGGGGCCGCTGATGTGGAGGACACGAAGGAGGGGGAGGACG  
AGGCAAAGCGGTATCAGGAGTTCCAG

>1309

GGCCAGGGAAAGCCTGCTGGATAGACCCGTCGTCAGCCCGGCATCACCTGTCAGCTCC  
CTGTGTCCACAGGCTCTGCAGCGGCTCAGGGAGGTCGTCCTTGATGCAAACACAATC  
AGTTCAAGAGGCTGAAAGAGATGA

>1310

AGTACCAGAAGGAGGGCAGAGTCTGTGCTTCTGCCGCTGACCCCTCCTTCCCCTGC  
CGGCTTCTCCAGGGAGAAGAAGGAGCTGCAGAAGATCCTGGACAGAAAGCGCCATAA  
CAGCATCTCGGAGGCCAAGATGAGG

>1311

CCAGCCAGAGCCTCGAGGCTCTAGCCCCTCCCTCAGGGCCCCTCAGCTGAGCCCTTGC  
CCACGCCTGTAGCTGGAGGAGGCCAGAAGCAGCGGCATGACCGTCTTGTGGCTGGG  
CAGCAGCAGGTCCTGCAACAGCTGG

>1312

GGCGAACAGGTGGGCAGACGGTGTGCAAGGCAGCCAGGCCTCGCCTGTGATGCCCAT  
CCTTCTCCACAGCTGCTGGCCCAGCTGGCCCAGGAGTGTGAGGAGCAGCGGGCGAG  
GCTCCCCAGGAGATCCGCCGGAGCC

>1313

GGGGAGGAGGGAGGCAGGCATGTCAGGGGTGGAGGGGAGCTTTGGCCATGAACCTC  
TTCATCTCCCCAGATGTCCCCAGTCCCCACTGCTGCTGACCCTGGATGATGTGAGCAG  
CAGCTCTGTGACTGTGAGCTGGGA

>1314

AAAGAAGCCCCATGGAGAGGGGGCGCCTGTGGCCACATTGCAAAGACCTCACACTCTC  
TCCATCCCCTCAGGCTCGGAGTGGGTGCCTGTGAGTGCCCGGCCATGATGGTGACCC  
AGCAGACTGTGCGGAACCTGGCTCT

>1315

TGCCCCATCTCAGAAACCCCAATCAGCCACCCCACTGCACTGCTAAGCCCAGACTCTT  
GCTTTGATCCAGAGGCCCCCAAGATCCGTGTCCCCGCCACCTCCGTCAGACCTACATC  
CGCCAGGTGGGAGAGACGGTCAA

>1316

TCCTGGAGTTAAGGAGGTGTGGGGACTCTGGCACCTCCCTACACTACCCTGGGGGCT  
CCTCCCTGCCAGGGGAAGCCTAAGCCTCAGGCCACATGGACCCACAACGGCCATGCCC  
TGGACAGCCAGCGGGTGAGCATGC

>1317

ATTTTGGGTGTGGGGGCTCTGTGCCAGCCTGGCCCTCACACTCACTTCTCTCACACTC  
TGGGCCTACAGAGAACTGGACCCCTGCTGCATCAGGCTCCTGGACGTCTGGGGC  
TGCAATGCTGCTTTCAGTGGAC

>1318

AGGTCTCAGGGTAAGCAGGGAGGGTGAGGACAGGGGTGAGAAATGAGGGTGACAC  
CCGGGGCCCTGCAGCAATGGTTCACAGTGCTGGAGCGCTACCACCCAACCACCTGCAC  
CATCTCTGACCTCATCATCGGCAACT

>1319

TAGTCAGTCTGACAGGTCTCCCTCACTCCTGTAAGCTCAGATGCACCCGACTTTCTCC  
CCTGAACCCAGATATTGCTGCCAAACCTAAAGGGTTTATTGAGCGAGACTTCTCAGAA  
GCCCCCTCATTACCCAGCCCCCT

>1320

CTGGGGATAGCTGTTGAGAGCCCCGCCAGTCCATACCTCCCCAGCTCTCTTCTGACC  
ATGTCTCCAGCCCAAGATCATCTGGATGAAAAACAAGATGGAGATCCAGGGCAACCC  
CAAATACCGCGCCCTCTCTGAGC

>1321

CTCTGCACCTCTCTGGCCTGCAGCCGAGCTCTGCTCACACCAGGGGCTCAGGAAGCAT  
GTCCTCTCCAGGTGCTGCAGGCCTGAGGGGCCAGGTCCACCAGGCCTACAGTCAA  
CTCCAGAGATGCCCAAGACCCCGC

>1322

TGGACATGCCAATACACATTACTGACATGTATGCCACCTGACCTGCACCCACTCATGC  
CCACTCTGCAGGGCAGCGCTCGCCATTGAATGACTTCCAGGTGCTCCGGGGCACAGAG  
CTACCTGCTACATGCGGTGGTG

>1323

CTGGGCCTAGATAAGACTGGGGGCAGGGGAGCCTGGGCCGTGGCGTTACCCTGTGCCT  
TCTTCTCTCCAGGGCCTTCCACTACAATGTGAGCAGCCATGGTTGCCAACTGCTGCCAT  
GGAICTAACACTCGCCGCACTCG

>1324

GGGGTGGAGAGGGGCAGGGTGGGAGACAGGGGACCTCAGCCCAAGTTGATCTTCTGT  
CTCTTGCTCCAGACTACATACGGACCTGCATCATGAACAATGGGGTTGGGTACCGGG

ACACCATGGCCACGACCGTGGGTGG

>1325

AACACCTTCCCTCCATCCCGCCTGGGACCTTCCCCAGCACACACTATAGTGATGCTC  
TGGGCCCTCAGGTACATGCCACGCTCCGGAATGGCCTGGAAGAGAACTTCTGCCGTA  
ACCCTGATGGCGACCCCGGAGGT

>1326

CGGGTCAAGCTGGGAGAGTGGAGGGACAAGCCCACGCCATCCACGAACCCACTGGC  
TCTTTGTCTCCAGCCGCTGTGTCTGGTGAATGGCGAGGAATACCGCGGCGCGGTAG  
ACCGCACCGAGTCAGGGCGCGAGTG

>1327

TAGGGCAACTGGGCGGGGCCAGATAAGCCAGAGTCCCAGGGTCTTCTTCACGCCCCAT  
TACCGCCCCAGGTTCTCGACCAAGGTCTGGACGACAACTATTGCCGAGTCCTGAC  
GGCTCCCAGCGGCCATGGTGCTAC

>1328

CGGGAGGAGGGTAGTCACAGGCTTAGGGCTGGAGGCTGGCGGGCTAGGGCTGAGTGC  
AGCGCCTGCTTAGAGACCTTCGGGAGAACTTCTGCCGGAACCCCGACGGCTCAGAGG  
CGCCCTGGTGCTTCACTGCGGCC

>1329

GGGGCTGGAAGCCTGGAACCGAAGGGCCGGGGCGAGGTCTCGGCCTGATGGCTGCCT  
GCACCCGCCGAGACTGCTACCACGGCGCGGGGGAGCAGTACCGCGGCACGGTCAGC  
AAGACCCGCAAGGGTGTCCAGTGCCA

>1330

TATGGGTCAGGCCCTTTAGCCACGACATCCACACAGTCTGGGTTTCATCCAGCCCACC  
CCATCCTACAGACCAGGTGCAGTTTGAGAAGTGTGGCAAGAGGGTGGATCGGCTGGAT  
CAGCGTCGTTCCAAGCTGCGCGT

>1331

AGCCAGAAGATGGCAGGTCTAGCATCTGTCCCAGGAGTCTGTTCCCTGTCCTAATTCCC  
CACTCCTCTAGGCAGGGCCAGCATTTCTGCGGGGGTCTCTAGTGAAGGAGCAGTGA  
TACTGACTGCCCGGCAGTGCTT

>1332

CAAGCTAACAAAGTGAGCCTTGGGGCAATGGACTGAGAGTCACAAATGACCTAGCAGA  
GCTTCTCTCCAGCCATATGCCTCTACGGGCTATGAGGTATGTTGGGCACCCTGTTT  
CAGAACCCACAACATGGAGAGCCA

>1333

ACCTGGGAGGGTGTGAGGTGGGGCTGAGCCTTGTGGCCTCAGACCCTGAGTGCCCC  
ATTCTTGCTAAAGATCTGTGACCCTGAACCAGCGTGTGGCCCTGATCTGCCTGCCGCT  
GAATGATATGTGGTGCCTCCAGGG

>1334

TGGCGGCCAGGAGCCCAGCCCTGGATCTTCTCCAGGACCGTCTCCTTCTCCCCATTCC  
CCTCACTGCAGGTACGGGTAATGACACAGTCCTAAATGTGGCCTTGCTGAACGTCATCT  
CCAACCAGGAGTGAACATCA

>1335

AACTATTTTATCATGAAGCAGGCTAGTCATGGCTGTGGCCCGGGCCTCATCAGTTCTC  
CTACCTGCCAGAGTGACTACGGGGGCCACTTGCCTGCTTTACCCACAACCTGCTGGGT  
CCTGAAAGGAATTAGAATCCCCA

>1336

TATTGGGTTTTTTAAGAATCAGTTCTTAGATTCATTTATCAATTCTAGTTTTTTGTTGTT  
GTTTTTAAGGACTCCTGAATATTTTTCAAACTGAACAATTTAGCCATGTCTGAGCTT  
TCCGTCTTCTGGAGGCACA

>1337

ATTATGCAGGAAACATTTAGTAATTTCAACATAAATATGGGACTCTGACGTTCTCCTCTT  
CATTTTGCAGAGCAGTCATTATGGCGAACCTTGGCTGCTGGATGCTGGTTCTCTTTGTG  
GCCACATGGAGTGACCTGGGC

>1338

TTTGGCCAGTTTTTGCCTCTGCATTCACTCCCACCTTGAATCTTTTCTTTCCCCACCC  
TGGGCCTCAGCACCCCCAAACAGGCGAACCTGTGTGTTCTTTGAGGCCCTGGAGTGC  
GGGAAGCACAAAGACTGGG

>1339

TTCCACACCCATTGTGCTTTCTTCTTGGCCCCCTTCTCTCCTTCCCCTAATCCCA  
TCCCATCAGGATGCCGAGACAGTGATGAGCCAGGCTGTGAGTCCCTCCACTGTGACCC  
AAGTCCCCGAGCCCACCCAG

>1340

CAGGAGGGGAAGAGCAGAGAGCAGGTTTGGGTCAGTGCTCTCCAGCCTGCATTCTTG  
CCTTGATGTCCAGGTGAGTCCATCTGGATGGCACTGGTGCTGGGGCTGTTCTCCT  
CCTCTGCTGCTGCTGGGCAGCAT

>1341

CTTTCACGAAGTCCCTTTTCTGTCCCTATGCATTTGCACCCTGACCCTAAGGCTCTTG  
TCTGTTCCAGCCCTGCTACAGCGAAAGAACTACAGAGTGCGAGGTGAGCCAGTGCCA  
GAGCCAAGGCCAGACTCAGGCAG

>1342

GTTGTGCTGGGGAGGAATCCTGGCCCTGTTATAGCTCAGAGGCCACACTCAGCACAG  
TGTCACCCAGCAGGTAATCCGGGAAGGAGTGCATGCAGTGGTTTGGGCCGGGCAGCTG  
CAAGGAAAAGTGGTTGCCATCAAGG

>1343

CTCTGCTCCCTGGGATGGATCAGCCGTCTCCAGCTTTGTGTACCATCCTTTTCTCTGCT  
GTTTCCCAAGGGCTCCCTGTGCCACTACTTGACCCAGTACACCAGTACTGGGGAAGT  
TCCCTGCGGATGGCACTGTCCC

>1344

CGCCGACTCAAAAAAAAAAAGAGGGAGGAAGAAAATCCATGTTCTTCAACCTTG  
GATTTTTCCAGGCCAATATAAACAGGTATTGCCACCGAGATCTGAGCAGCCAGA  
ATGTGCTCATTTCGGGAAGATGGATC

>1345

TGCATGGACCATTGCTGCAATGAGGATTGCCACAGAGATGATTCTTGGCCCTTCGTGCC  
TTGCTCTCAGGCTGGCACCCAGAGGTACATGGCACAGAGCTCTTGGACAAGACTCT  
GGACCTACAGGATTGGGGCATGG

>1346

TGTCTTGCCCTTCTACATGGTAGGCACCCCTAGGACTAACTGATACCCAGCCCTCTA  
CCTTCTCCAGACAGCAGTCCACCACCTTCCAAGTGGCCTATGAGGCAGAACTGGGC  
AATACCCCTACCTCTGATGAGCT

>1347

AGATGGCTTTAAACCCTGGGGCCCACTCAAGATCCTAGGGTCAACCCTTCTCCCTGTC  
ATTCCCCCAGGACCCTGATGGGCTGAGGGAGCTCCTAGAAGACTGTTGGGATGCAGA

CCCAGAAGCACGGCTGACAGCTG

>1348

GCTCTTTGCGGAAGTCCCCATGCTGGCCCTTGACCCTCATGAACCCTGCTGCAAC  
CCTGTGTTTTAGGCCGCGTCACTACTGCAGCAAGATGGGCTTTGAACCTCTAGCCTA  
CAGGGGCCTGGAGACCGGTTCCC

>1349

GGAGACTAAAAGCCAGGTGAGGGGACCTAGACTCCAGACTCCAGTGCCATCCTCTCC  
CTGCCGCCACAGAGATGGGCGATCACCTGGTGAAACACGGTGACGGAGTGAAGGAC  
ATTGCGTTTCGAGGTGGAAGATTGTGA

>1350

TATGAAATGTGCTCTGTCTCGGCGGGGATGGGTGCCAGGGGCCGAGCCAGGCTGTT  
TTCCACCCGTAGTATGGGGACACCACACACCCTGGTGGAGAAGATGAACTACATCG  
GCCAATTCTTGCTGGATATGAGC

>1351

GAGGGGTCATGGAGAAGGGAGCAATCTGGGGGTAGCCACCTTCTACCCCCATCTTC  
TTCCCTTCCCAGGCCAAATGCAGTCTGGAGATGATCGACCACATTGTGGGAAACCAG  
CCTGATCAGGAGATGGTGTCCGCC

>1352

GTGGAAATGGGTGATGGAGGCCGTCCCTGGAGGCGCTCAGAGCATATGTGTTCCACCG  
CCCACCCTACAGGTACCTGAAAACTGCAGTTCCACCGCTTCTGGTCCGTGGATGAC  
ACGCAGGTGCACACGGAATATAGC

>1353

GGGCTTTGTAGGGTCAGGGATGTGGGTGATGGGGCAAATGACAGTGGTCTCCTTGTT  
TCCCTCCCCAGGAATATGTGGACTATAACGGGGCGCTGGGGTCCAGCACATCGCTCT  
CAAGACCGAAGACATCATCACAG

>1354

AGCACCTCCACCTGGCTAGGGGAGTTGAACTTGGAGGCCGAAGGCTGACCTCAGCTT  
TGCTCTGAAACAGATTGCCACTTGAGAGAGAGAGGCCTGGAGTTCTTATCTGTTCCC  
TCCACGTACTACAAACAACCTGCGGG

>1355

GCCCCTGTGGACTTTCCAAGGATCTCACCGTGCCAGCCTCCCCTAGCAGAGCCCCCTG  
TCTCCCGCTAGGAGCTGAAAATCTGGTGGACTACGACGAGAAAGGCTACCTCCTGC  
AGATCTTACCAAACCGGTGCAGG

>1356

CGAGGGGACAGGCAGCTAGCACACTCGGTTTTCTGGGTCCTTGCTCATCTCCTCTCTT  
TCCCGCCACAGGTTTTGGAGCCGCAACTTCAACTCACTGTTCAAGGCTTTGAGGA  
GGAGCAGAACCTGCGGGGTAACC

>1357

GCCAGGAAGGGGTAGCGGGGACGTGCAGTGTGCGGGGAGAGCGGCTTGCTGCCTCGT  
TCTTTTCTGAGGCCCCAGGATGCAGGCCCTGGTGTACTCCTCTGCATTGGAGCCCT  
CCTCGGGCACAGCAGCTGCCAGAA

>1358

TGAGGAGACAGTCCCTGTGCATCTCTGCGAGTCCCTGAACTCAAACCCAAGACTTCTT  
GTCTCCTGCCAGGGCTCCCCAGACCCCGACAGCACAGGGGCGCTGGTGGAGGAGGAG  
GATCCTTTCTTCAAAGTCCCCGTGA

>1359

GTTCTGGGAGGGGGCTTGATTGGGGCCCTGGTGTGCAGTTATCAACGTCCACATCCTT  
GTCTCTGGCAGGAGCGGAGCAGCGAACAGAATCCATCATTACCGGGCTCTCTACTAT  
GACTTGATCAGCAGCCCAGACAT

>1360

GGCAGGCTCTCAAAGACGGGATGCTTGTGTCGAGTCTCATAAGCTAACCTCTGCTCC  
GCCTCTTCTCAGAGCTGCGCATAAAATCCAGCTTTGTGGCACCTCTGGAAAAGTCATAT  
GGGACCAGGCCAGAGTCCTGAC

>1361

GGGACACAGCATGGCGCCACTGTCTTTCTGGTCTCCTGGGGCTCAGACTATGTCATACA  
CTTCTTTCCAGGGCAGTGGGTAACAAAGTTTGACTCCAGAAAGACTTCCCTCGAGGAT  
TTCTACTTGGATGAAGAGAGGAC

>1362

TCCTGGCTGTGTCTGTCCCCGGCTTTTGGGCTCTGAAGGACTAACCACATGCTTTCTC  
ACTTGTCTCAGATTGCCAGCTGCCCTTGACCGGAAGCATGAGTATCATCTTCTCCTG  
CCCCTGAAAGTGACCCAGAATT

>1363

CAAAGGGATCCCTTGGTTGGGGTGTGGGGAAGGCAGGGTTTTAACGGAAATCTCTCT  
CCATCTCTACAGAGCTGCAATCCTTGTGTTGATTACCAGACTTTAGCAAGATCACAGGC  
AAACCCATCAAGCTGACTCAAGG

>1364

ATCTTCTGCAGACTCACAAAAGGCAGCTGCCAAGCAGGGCCTGACCCCTCGGTGTC  
CCCTCCCCACAGTACTGTGCAGCCCTGGAATCCCTGATCAACGTGTCAGGCTGCAGTG  
CCATCGAGAAGACCCAGAGGATGC

>1365

AGCCCCTGGTTTGTGCGAGTCGTCCCGCCTCTGGCGTTCTACTCACGTGCTGACCTCT  
TTGTCTGCAGCAGTTTTCCAGCTTGCATGTCCGAGACACCAAATCGAGGTGGCCCA  
GTTTGTAAAGGACCTGCTCTTAC

>1366

GGAGAGGAAGAGCCAGGCTTTAGCTCCCATCTCAGGGTGGGGGATTTTTGACTCTAC  
CTCTCCCCACAGATGAGCAGCAGCTGCTCAGGGCTGAGCAGGGTCTGGTGGCCGTG  
GCTACAGCCCTGGTGTCTGCCTCCT

>1367

GAGCTGTGGCATGGTCTGACTTATGCTTGACATCTTGTCTTTGTCCATTGTCACCTCATC  
TCACTTCCAGGGACCCAGTGTCTGTTTCGGGATGGGGAGCCAAAGCTGCTCCAGG  
GACCTGACTCTGGGCTAGGGCAT

>1368

CTAAGTAAGCCCTCTGGGACCAGGAGGACCTGAGGACTGCTCAGTCTCCAGGTGTACC  
CTCTGCCTCTAGACCCTCAGCCCGCCCTGTTGTCTCCTGCCAAGCAGCCGACTATGAG  
AACTTCTCTTGCACTTGGAGTCC

>1369

GCATGTGGGGGCTCCAGCTGGGTCCCACAGTAGGCATTTTCAAAGCCAAAGACCACAT  
CCTCCCTTCTAGGAGGAGTCCATCCACAGGGCCCTGGCCATGCCACAGGATCCCCTA  
GGGGCTGCCCGCTGTGTTGTCCAC

>1370

ACTTTGGGAAGTGGTGGGGAAGTGATGGAGACCCATAGCCTACCCTGACTTTGTGTCT  
TGATGCCCTTAGTGCCCTGACCCACCCAGGGCCTGCGGGTAGAGTCAGTACCAGG

TTACCCCCGACGCCTGCGAGCCAG

>1371

CTTTGTAGATGGTGGCTGGGAAGGCCCTGCACTTACAAGCTGGGTAACAGTGAGTCAT  
GTTTACCCCCAGGTGGAGCCAGCTGGACTGGAGGAGGTGATCACAGATGCTGTGGCTG  
GGCTGCCCCATGCTGTACGAGTCA

>1372

CCTTGAGCACAGGACGTGACCCCCGTCCCCACCAGCGTATGGACACTTATTGGGTCTT  
GCCTTCCTTTAGGGACCATAACAAAGGAGATACCAGCATGGGGCCAGCTACACACGCA  
GCCAGAGGTGGAGCCTCAGGTGGA

>1373

AACCCAGAGAAAAGGGGACACCGAGCTTGGTCAGGCTTGCTCTCAGTGACATGTGG  
CCCTCCCCCTCAGATCACAGGGACTCTGTGGAGCAGGTAGCTGTGCTGGCGTCTTTGG  
GAATCCTTTCTTCTGGGACTGGT

>1374

TAATAAACCTTTGGCGGAGACTGAGATAACCCACATTGTTGGAGAGACAGCTGCCTT  
TCTATGCCCCAGGCTGAGGCTGAGACGGGGTGGGAAGGATGGATCCCCAAAGCCTGG  
GTTCTTGGCCTCAGTGATTCCAGTG

>1375

TCATTCTCAGGGTGTCTGGGCCAAGATCCGGTCTTACTGTCTCTCCTGATTGCTCCT  
GCTTCTTCTAGGAGCTCCAAACCTGTAGAGGACCCAGGAGGGCTTCGGCAGATTCCAC  
CTATAATTCTGTCTTGCTGGTGT

>1376

ATCAGAGCTCCTGGGCTGCATAGGAGTGGCCAGGCTAACAACCTGACCCCTTCCCTTC  
CTCCCTGGGCAGCTCCCTGCGGTGTGGCCCCCAAGCACGCATCACAGGTGGCAGCA  
GTGCAGTCGCCGGTCAGTGCCCTG

>1377

GGGGTTGGCAGTGGGGGTTGGGGAACAAGGAGAGGTCTCCTGGGTCTCAGCCTTTGC  
CCCCTGCCTGCAGCGAGCACACAAGGAAGCCTATGAGGTCAAGCTGGGGGCCACC  
AGCTAGACTCCTACTCCGAGGACGCC

>1378

GGTGCCTAGAGGTGTGGAGGGGCACCTGACTTGGGGAGGGGCCAGGGTAAGCCTCT  
TTTACCCCCACAGTGAGCCTCCTGACGCCCAAGCCACTGCAGCAACTCGAGGTGCCTC  
TGATCAGTCGTGAGACGTGTAAGT

>1379

ATGACCAGTGCAACTTCGAAAGGAGGCCTGGCCCGTCTGATGGCTGCTGTGTGGC  
TTCTCTCCTCAGGGTGAAGTCTGGGGGCCACTCTCCTGCCCTGTGGAGGGTCTCTGGT  
ACCTGACGGGCATTGTGAGCTGGG

>1380

ACTCCAGGAGTGGGGGCGGTGCGTCCTCCGGCGCGCAGCGGTGGCCACAGCTCTCCT  
CCCGCCGCCGAGGTCTTCTCACCCTTTGCGCGCCCCGAAGCCGACCCTGCGCTAC  
TTCACCACCGAGCGCTTCTGCCCC

>1381

TGGACATGCCAATACACATTACTGACATGTATGCCACCTGACCTGCACCCACTCATGC  
CTACTCTGCAGGGCAGCGCTCGCCATTGAATGACTTCCAAGTGCTCCGGGGCACAGAG  
CTACAGCACCTGCTACATGCGGT

>1382



ACTGGGCTAGATAAGACTGGGGGCAGGGAAGCCTGGGCTGTGGCGTTACCCTGTGCCT  
TCTTCTCTCCAGGGCCTTCCACTACAACGTGAGCAGCCATGGTTGCCAACTGCTGCCAT  
GGA CTCAACTCGCCCCACACG

>1383

GGGGTGGAGAGGGGCAGGGTGGGAGACAGGGGACCTCAGCCCAAGTTGATCTTCTGT  
CTTTGCTCCAGACTACGTACGGACCTGCATCATGAACAATGGGGTTGGGTACCGGG  
GCACCATGGCCACGACCGTGGGTGG

>1384

AAACACCTTCCCTCCGTCCCGGCCTGGGGCTTCCCCAGCACACACTATAGTGATGCTC  
TGGGCCCTCAGGTACACGCCCACTCTCCGGAATGGCCTGGAAGAGAACTTCTGCCGTA  
ACCCTGATGGCGACCCCGGAGGT

>1385

GCCGGGTCAAGCTGGGAGAGTGGAGACAAGCCCACGTCCATCCACGAACCCACTGGC  
TCTTTGTCTCCAGCCGCGTGTGTCTGGTGAATGGCGAGGAATACCGCGGCGCGGTAG  
ACCGCACGGAGTCAGGGCGCGAGTG

>1386

TAGGGCAATTGGGCGGGGCCAGATAAGCCAGAGTCCCAGGGTCTTGTTACGCCCCAT  
TACCGCCCCAGGTTCTCGACCAAGGTCTGGACGACAACTATTGCCGGAATCCTGAC  
GGCTCCGAGCGGCCATGGTGCTAC

>1387

CGGGTTTGGTCCCAGCCCCAGAGGGATCTCAGCTCTCGCTCGGGGCCCGACCTATCTC  
GGTCCATCTAAGGGTCCGAGGCACAGCCCCGCAAGAGGCCACA ACTGT CAGCTGT  
TCCGCGGAAGGGTGAGGGCTACCG

>1388

CGGGAGGAAGGTAGTCACGGGCTCAAGGCTGGAGGCTGGCGGGCTAGGGCTGAGTG  
GAGCGCCTGCTTAGAGACCTTCGGGAGAACTTCTGCCGGAACCCCGACGGCTCAGAG  
GCGCCCTGGTGCTTCACTGCGGCC

>1389

GCCGGGCTGGAAGCTGGAACCGAGGCCGGGGCGAGGTCTCGGCCTGATGGCTGCCC  
GCACCCGCCACAGACTGCTACCACGGCGCAGGGGAGCAGTACCGCGGCACGGTCAGC  
AAGACCCGCAAGGGTGTCCAGTGCCA

>1390

GGTGTCTGGGACCAGAGCCTGAAATGGTTGAGACTACCCTGCCACGATTTTGCTCCC  
GCTTCCGCTAGGTTACGTTTACCTCCGAACCGCATGCACA ACTGGAGGAGAACTT  
TGCCGGAACCCAGATGGGGATAGC

>1391

TATGGGT CAGGCCCTTAGCCACGACATCCACACAGTCTGGGTTTCATCCAGCCCACC  
CCATCCTACAGACCAGGTGCAGTTTGAGAAGTGTGGCAAGAGGGTGGATCGGCTGGAT  
CAGCGGCGTTCCAAGCTGCGCGT

>1392

CAAGAAGATGGCAGGTCTTACGAATCTGTCCAGGAGTCTGTTACCTGTCCTAATTCCC  
CACTCCTCTAGGCAGGGCCAGCATTTCTCGGGGGGTCTCTAGTGAAGGAGCAGTGGA  
TACTGACTGCCCGGCAGTGCTTC

>1393

CAAGCTAACAAAGTGAGCCTTGGGGCAATGGACTGAGAGTCACAAATGACCTAGCAGA  
GCTTCTCTCCAGCCATATGCCTCTACGGGCTATGAGGTATGGTTGGGCACCCTGTTT

CAGAACCCACAGCATGGAGAGCCA

>1394

ACCTGGGAGGGTGTGAGGTGGGGCTGGGCCTTGTGGCCTCAGACCCTGAGTGCCCCC  
ATTCTTGCTAAAGATCTGTGACCCTGAACCAGCGTGTGGCCCTGATCTGCCTGCCCCCT  
GAATGGTATGTGGTGCCTCCAGGG

>1395

TGGTGGCCAGGAGGCCAGCCCTGGATCTTCTGCAGGACCCTCTCCCTCTCCCCATTC  
CCCTACTGCAGGTACGGGTAATGACACAGTCCTAAATGTGGCCTTGCTGAATGTCATC  
TCCAACCAGGAGTGTAACATCAA

>1396

AACTATTTTATCATGAAGCAGGCTAGTCATTGCTGTGGCCCGGGCCTCATCAGTTCTC  
CTACCTGCCAGGGTGACTACGGGGGCCACTTGCCTGCTTTACCCACAAGTCTGGGT  
CCTGGAAGGAATTATAATCCCCA

>1397

GATACATACTCTGGGGCCTGCCTCCCTGGAGATGAGGATGAGACCCTGTCCCTTGCTG  
TTCTCCAACAGGTGCTGGGAGGCCCTCCTTGGCTTAGGAGGACACTTCCAAAGCTGGG  
GCGCCCCAAGGAGGCACCAAGTGG

>1398

TCGGGGTGCAGCAGACAGTGGACGCGAGGCACAGCGACTACCAGTCACCCACCTGAG  
CCTCCTGCCACAGCCTTCATCTCCGTCTTGGGCGTCTGCCCCCTGTACCTGGATGAGAT  
CCGGCACTTCTGACCCTATGTCC

>1399

GGGTTGGTGGTTGGGGGGAGCACGTGTCAGCAGAAGTGACCTGGGATCTCATCCCTT  
GCTCGCTCCCAGGAGTCACTGACGCTGCACAGGTCTGGGGGCCACATAGCCACCTGC  
ATGTGCTGGCCGTGCACCGCGCCT

>1400

TGTGGCCGAAAGGGACTGAGGCTGGGTGAGTTGCGCCGTTTTCTAACAGTTTTCCC  
ATCCTGTGCGAGACAAAGAAAAGAAGGAACAATGGTCGTGCCAAAAGGGCCGCGG  
CCACGTGCAGCCTATTCGCTGCACTA

>1401

TCTTCATTATGTAACAAAGAAGCAAGGTAGGTATATAATACCAGTATAACTCTATTTTC  
TATTCCTTAGCCTATGTGCTTCCCAAGCTGTATGTGAAGCTACATTACTGTGTGAGTTGT  
GCAATTCACAGCAAAGTAGT

>1402

AAGTTCTTTGGGGGAAGGGAGTCTTGGATCCATGGGTTTTAATTTACTCTTTGTTTCTT  
TGCTTTTCAGGGTGTGCCCCACGTCCCCACCAAAGCCCATGTAAGGAGCTGAGTTC  
TTAAAGACTGAAGACAGGCTAT

>1403

CATAAGGCAAATCTCAAAGTTGTTTATTGCTTTACATAACCTTGCACTTCTCTCTC  
ATAATTTAGGATCCAGTGCAGATATTGTGATGACCCAGACTCCACTCTCTCTGTCCGT  
CACCCCTGGACAGCCGGCCTC

>1404

CATAAGGCAAATCTCAAAGTTGTTTATTGCTTTACATAACCTTGCACTTCTCTCTC  
ATAATTTAGGATCCAGTGCAGATATTGTGATGACCCAGACTCCACTCTCTCTGTCCGT  
CACCCCTGGACAGCCGGCCTC

>1405

TCCGAGGGGCTGGAAGAAAAACAGAGCCTGTCTGCGGTGGAGTCTCATTATATTCAA  
TATTCTTTTAGGAGCCATTCCGTAGTGCCATCCCAGCAACGCACTGCTGCAGCTTCC  
CTGAGCCTTTCCAGCAAGTTTGT

>1406

CATCTCTATTTCTCCCTATTTATTGGTGTGGTTTATTCTTTAACCTTCCACTCCCCTCCCC  
CTCCCCAGAGACACCATGATTCCTGGTAACCGAATGCTGATGGTCGTTTTATTATGCCA  
AGTCCTGCTAGGAGGCGCG

>1407

CTTGACTCTTCCATCTTTGAAAAAAGTTCATATGCTTTTTCTTTTCCCCTTCCTTCTAA  
CTGTGCCTAGAACATCTGGAGAACATCCCAGGGACCAGTGAAAACCTGCTTTTTCGTT  
TCCTCTTTAACCTCAGCAGCAT

>1408

ATAGAGTAACTTGAGAAGAATGTTTGACAGCCAGGTTAAGTGTACAAATCCTTCT  
GCCCTCACTTAGGCATCTATATCATAAATCTCAAGAGGACCTGGGAGAAGCTTCTGCTG  
GCAGCTCGTGAATTGTTGCCAT

>1409

AAGTGCTTACTGGGTGCCAGGATTGTTGCTGTGGAATATCGAGTACCACTAACTTTTAA  
ATTCTTCAAAGAGGGCTGTGCTGAAGTTTGTGCTGCCACTGGAGCCACTCCAATTGC  
TGGCCGCTTCACTCCTGGAACCT

>1410

GAGCCAGGAAGGTGCTTGCTGTTGGGTTTGACCAAGTGCACTTTTAAATAATCTGCC  
ACTCTTGGCAGGGAGCTCACTCAGTGGGTTAATGTGGTGGATGCTGGCTCGGGAAGT  
TCTGCGCATGCGTGGCACCATT

>1411

GGACTGCTGTCTAGGAAGCAAACTTGTGAGTCCCTGTAAGTCTTCTCCTTTTTTTTT  
TTGTAACCCAGATTGAAAAAGAAGAGCAGGCTGCTGCTGAGAAGGCAGTGACCAAGG  
AGGAATTCAGGGTGAATGGACTG

>1412

GGAGTGGGGTAAGGAAAAATACTACATTGAGGACAGAGCTGATGGGCTTTTTTTGGTA  
TTCTCTTAACAGAAGACTGGAGCGCTCAGCCTGCCACGGAAGACTGGTCTGCAGCTCC  
CACTGCTCAGGCCACTGAATGGGT

>1413

TATTTCTTCTTGATACTGTTGGGGACATGGCTCTGCCTCTGACTTCTGCTTCC  
TTCCCTGCAGACCTATGCCAGATTTACTGGTGCTCCACTGAAGGTACACAAGATCAGCA  
ACCCCTGGCAGAGCCCTTCAG

>1414

GGAATGTGTTGCAACTATGTATGACTAGGCAGCTAAGGGTCTGGTTGGTATACTTCCT  
CTCAATATCAGGAACCTGCCTGCCCTTCGGACCAGTCATGGAGAGGTCATCTCAGTTC  
CACACAAGATCATCACCCACCT

>1415

GACTCCTTCTCCCTGGTGAAGTGCCCTTGCACTCCCTAGTGTCCACGCCATGGATAT  
TTCTCCACAGAAGTACAATGCTGATTATGATCTGTCAGCTCGGCAAGGGGCAGACAC  
CCTGGCCTTCATGTCTCTCCTGG

>1416

GAAGCCCACCTGAATCAGACAGGTGCACTGGCTCAGACCTACCTGTTTCTCCTGCC  
CACCCAATCCAGGTACATACTTTTTGGATAGACACCAAGAAGTACGTGGAAGTGACCC

GGAAGTGGTATGCAGAGGCTATGC

>1417

AATGGGAGTGCTTAGGTGGGGAGGTGGCACTGTCCACAGCTGCAAGCCTACCTGTG  
TCGCCCCTACAGCTGTACCGAGAGGCTCGGGAGTGTCTGACCCTGCTCTCAGCGCC  
TGGGCTCTCAAAGTTCTTCTTTG

>1418

CTCCAGCTCCATCTTTACCCCTTCTACCCAGTGGTTCTCCTCCATCCCACCCTTCTCTC  
TCTGCTCCAGCCCTGCCTCCTTGGACGCCTTCGTCTCAGCTACTTGGCCCTGCTGCTG  
CAGGCAAAGCTGCCAGTGGG

>1419

AGCCCTGGGGAGAGTGGGCAGGGATCCAAGAAGTCTCCTAACACACCTTCCTTC  
CTTGACCCTCAGCTGAGGTACCACCGCAACGCCAGACACCAGCAGGCCAGAGACTG  
AGGAGGAGCCATACCGGCGCCGGAA

>1420

TGGGGTTTAAATACTGGAGATGGAGGCAGACCTGGGGCCAGATGTTCTGTGCCCT  
CTTACCCTCAGGTTGGAGAGCAGTGACGGGGATGGGGCCTGGTGCCCCGAGGGTC  
GGTGTTCCTCAAGGAGGAGGAGTAC

>1421

CCAGGCCTGATGAAGGGATGGGGGATGGAGTCTTAGTGCCTCTGACCCCCACCCTTT  
ATTTTTCCAGATGGACTCCTGTCTTACACCGCCCCTGTGGGGCAGACAATGTATTTAT  
CTGAGGCCGTGTACCTCAACGA

>1422

ATGCAGGGTGCCGTTGGGGTGCCCCACCACTCCTAGCCTTGACCCTGTGCCCTCTCC  
CTTCCCCCAGGTCCACTGTAACAACATGCACACGCTGGGAGCCCGTCTGCCTGGCGG  
GGTGAATGTCGCTTCCGGCGTG

>1423

CACTGCCTCTGCCTCCCTTGGGTCTCCTCCTCATTACCTCCCTCCTTTCTTTTGTTCCT  
TCTCCCAGATGTGGTGAACAATCCTCTCCGGCACTGGGAGGCACCTTCCCAGCAGC  
CCCCTGGTGCCCGCTGGCCC

>1424

CTTCTCCCTGGGCCTCCCCCTCGGCTAGGGTGGGACCCTCCTGTGGTGCTGACCCTGCT  
GCCTCACCAGAGCTGGAGCCAGAGGCCAGCAGCCCGTGGCCAAGGCCGAGGGGA  
GCCCCACCGCCATCCTCATCGGCTG

>1425

ATGGACACAGCAGAGGGCCAGGCCGTGTGTGCTGAGCAACACGGGTGATGCCTCCA  
TCCCTATGACAAGGCTGAACGGAGGGTGTGGAAAGAGGAGCTGACGGTTCACCTCTCT  
GTCCCTGGGGACACTATCCTCATCA

>1426

AGGTCTCCCTGTCTGTCTAGCCTTGAGTCTCATCCCTTCCCCGTGTTCCCTCCTCCTT  
CTCCCGACAGCGTTGCTGCTCTCCAATCCAGCCTACCGCCTCCTTCTGGCCACTTACGC  
CCGTCCCCCTCGAGGCCCGG

>1427

GTGTGGGGAAGTATAGCTCTTGGGCTGTTCTGATGCCTCGTCTGTCTTTCCCTC  
ACCCCTGCAGCCTACAGTGGGGACTATATGGAGCCTGAGAAGCCAGGCCGCCCGCTTC  
TGCCCCACCTCCCCAGAACAG

>1428

CTTAGTCATTTGTAACCGTGTTAATCCGTTTGACCCTGTGACCGCCTAGCAAACGAACT  
TCTTTCTCCAGGTGCACCTGTGTGAGGTCGACAGCCCTCAAGATCTGGTTAGTCTTGAT  
TTCCCCCTTAATGTGCGTAAGG

>1429

CTCTCTCCTCTCCTGGATGGGAATCTGCGAAGCTGCCCCAGTGACCTTCTGTGGT  
TCCCTTCTCAGCTACCAATGCTGCTGCATGTGGCAGCCCAGATCGCCTCCGGCATGCG  
CTATCTGGCCACACTCAACTTT

>1430

AGGAAGGGAGGGGGGTCAACCGTTGCCTGATGTCCCCTGTCTGTTTTTGCTGCCTTCC  
TCTGCATCCCAGGGGAAGTTCACGACTGCGAGTGACGTGTGGGCCTTTGGTGTGACCG  
TGTGGGAGGTGCTGATGCTCTGTA

>1431

TTGGTGGGGAGGTCATGGACACAAATCAGAAAATACAAGAATGGGCCTCCCCATTTC  
TCCTCTGACTAGGATGGGGACCCAGACACGCCAAAGCCTGTGAGCTTCACAGTGAAG  
GAGACAGTGTGCCCCAGGACGACAC

>1432

TCCCACTGGGATGTGGCTGGGAGGTCATGGCAAATGGTTTCAAGTTTGACCTTGAGCT  
TCTCCTTTCAGCTGGTGAAGCGGTGTATGGGGACAGTGACCCTCAACCAGGCCAGGG  
GCTCCTTTGACATCAGTTGTGATA

>1433

GGAGGGGTCTTGGATTGACCCTGGGTACATCCCCGACAAGGAACCTGTTTCTTCTGT  
ACACAACCCAGGATAACAAGAGATTTGCCCTGCTGGGTGATTTCTCCGAAATCTA  
AAGAGAAGATTGGCAAAGAGTTTA

>1434

TTCCCGCCCGCCTCCGCTCTGCCTCCTGGCCAGCCCTCACCTCTCCGTCTCTCCGTGCC  
TTCCCCTCCAGGCCCTTTGGCCACTGCCGCACCCCCCTGCAGTCCCCTCCTGAAGGC  
GCCCTCCCCGGCTGGCCCCTTAC

>1435

CTGTCTAGGGGGGAGTGCACCCTCCTTAGGCAGTGGGGTCTGTGCTGACCGCCTGCTG  
ACTGCCTTGCAAGTGAAATTGCCCTGTGGTCTTGGTGGTCTGCCATCGAGCGGTA  
CGTGGTGGTGTGTAAGCCCATGAG

>1436

GCGCTCGGCAGCCACCTTGGCTGTTCCAAGTCCCTCACAGGCAGGGTCTCCCTACCT  
GCCTGTCTCAGGTACATCCCCGAGGGCCTGCAGTGCTCGTGTGGAATCGACTACTAC  
ACGCTCAAGCCGGAGGTCAACAAC

>1437

CCCAGCATGCATCTGCGGCTCCTGCTCCCTGGAGGAGCCATGGTCTGGACCCGGGTCC  
CGTGTCTCAGGCCGCTGCCAGCAGCAGGAGTCAGCCACCACACAGAAGGCAGAG  
AAGGAGGTCACCCGCATGGTCATCA

>1438

CTACTAACGTGCCAGTTCCAAGCACACTGTGGGCAGCCCTGGCCCTGACTCAAGCCT  
CTTGCTTCCAGTTCCGGAAGTGCATGCTCACCACCATCTGCTGCGGCAAGAACCCAC  
TGGGTGACGATGAGGCCTCTGCTA

>1439

GTGACTTTTTCTTGACCATAAATGGAAACTCTGCAACTGATCTTTGTATACCCCATGTGA  
ACTGTTGCAGCACCATCATTGCATTTGCTCAGTATGTTTCAGGAAGCAACCTTTGAAGAA

ATGGAAAAGCTGGTGAAAGAC

>1440

TTTTCTCAGTGAGTACAGAAGCTTTACTTTACCATGACTAAAAATTGCCTTTTCTTCTC  
TGTTGTATAGAATAATGTTTTACAGGAAAAAATATGTGCTATGGAGGGGCTGCCACAAA  
AGCATAATTTCTCACACTGCT

>1441

CTTGTCTACATTCATTGCTTCCTGTTTTCTTCCCTCACCCGCTTCTCTCTTTTCATTTTTATT  
TTTTATAGCTTTTTATATGAAGTTGCCAGAAGGAACCCATTTGTCTTCGCCCTACACTT  
CTAACTGTTGCTGTTTCAT

>1442

TATGACTAAAAATAAGAGAATAGTGAGATTTTGCTATTGTTTCAAAGAATTTTCTCTT  
TCTTCTTCAGGCAATACCTGTACACAATATTTAAAGCATTTTCTTCTTATCAAAAACA  
TGCTGTGGGGCACTTTTGA

>1443

TAGCAAATTACTCCCCTGTTCTACTTGCTGTTCAAATTATTTTTGTGGTTTATCAATTC  
TCTTTCAGATATATTGCGATACTCAGTCAAAAATTCCCAAGATTGAATTTAAGGAGCT  
TATTTCTCTTGTAAGAAGAT

>1444

TGCCATCATTCCATAATGGAAGAAAACCCAGCCTGAAAGTAAAATAATCTCTCATTCTT  
ATTTGGTACAGAGCAAGGTTATGAACCATATTTGTTCAAACAAGATTCTATCTCCAGC  
AAAATCAAAGAGTGCTGTGAAA

>1445

TACAAAATAGTGAATTGGGTTTTTGTCTTTTCTCTAATTTCTAATATACAAAATTTTAC  
ACATTGCAGGTTTACTTTTGAATACTCAAGGAGACATCCAGACCTGTCTATACCAGAGC  
TTTTAAGAATTGTTCAAATA

>1446

CACATTGATGTAAAGCTTATGGTTAAATTTAGATAAAATGTTTGTAACCATGATTATTCT  
TATTTTCAGGAAGACAAATTCAATGAGACAACCTGAGAAAAGCCTCAAGATGGTACAAC  
AAGAATGTAAACATTTCCAGA

>1447

TTCAGCAGTAATTCAAGGGAAAATGGGTATCTGCTTTCATTGAGAACCAAACAGACAA  
ATGTTCTTTTCAGTTACCTCATCAGGCTCACGAAGATAGCTCCCAACTCTCCACTGAAG  
AACTGGTGTCTCTTGGCGAGAAA

>1448

CTAACCATATTTTAGAAATCCATTCAAGTTTTAAGATCGTATCTCAGTTGCAACTCTT  
GTTGGTACAGGCAGATTTAGTTTTTGGAGAGTTATGTGGAGTAAATGAAAATCGAACTA  
TCAACCCTGCTGTGGACCACT

>1449

AGCATTTTGGAGTAGAGACGCTTCAGAAAGAAAGCGTTAATTAATTTTATTTGACATCT  
TTTGCCACAGGTTTCTGTCAACTTAGTGAAGCTGAAGCATGAACTCACAGATGAAG  
AGCTGCAGTCTTTGTTTACAAAT

>1450

GACTTTCTATACCCAACTTTCAACATTTTCATGTTTTTTTGTATGCATGAAATACTATCTTC  
TCTTTCAGGGAAGGCTTCTATCTGTGTGGTGATGAATCGCATTTTCTGAGAACAAAA  
TAAAAGGATTTTCTGTAAC

>1451

TGCAGATTTAAGGTATTTCCACATTTGGGTCTATAATAATAATATTCTGTATAATTTATTTT  
TTTTGCAGTGCCATGAGAATGATGAAAGACCATTCTATCAGAAAACAGCTCCATATGTC  
CCAATGTATTATGTGCCAA

>1452

AATAAATATATATCATGAGAACTGTAAACATACTATGAATAAATTTCTAAACTATCATTATT  
TTTTATAGGACTTGCTGAAACCAAATTACTACTTCACACTCTCCTTCAGCCATTTGTCTG  
CCTTCAGTCAACAGAAAA

>1453

CGCGAGACTCCCCTTGTCTGTCCTAATAACCTGCCAGCGCCTGGCTGGTCGGCATCCCAC  
TTTTCTCCGCAGATCTCCCTAGAGCACGAAATCCTGCTGCACCCGCGCTACTTCGGCCC  
CAACTTGCTCAACACGGTGAAGC

>1454

ACTTTTATTGCAGATGTCTTTAGAGGCTCTTGGACACACAGTGTCTTCTGTTTCTCATC  
CTCCTTGCAAGTATGGCTTTGTAATTGCTGTCACCACCATTGACAATATTGGTGCTGGTG  
TGATCCAGCCAGGCCGAGGC

>1455

AGTGAAGTGATTGTGATGTAACCTCTCATAAACTGAGGAGCATCTGTACACTGTTCCCT  
CCTCTCCTCAGGATATTGTGATTGAGCAGGACGATGAGATCCGCTTAAAGATTGTGGGG  
ACCCGTGTGGACAAGAATGACA

>1456

GATGAGGAGTACATGGTTGTGGCTACCCTAAATTCGGTTCTAACTGATATGCTTTTTCT  
GGTTTCGCAGGGCTTGTAAGCTGAGCCTGGTGGCCTCCTACCCTGGTCTACTCTAGG  
AAGTGTGATTGTCACACTTAT

>1457

GGCAGTCCCCACCTTGGCCAGCGAGGTCGTGCCCTCAGCCTGCTACCCCCATCTCC  
CTCCCTCTCCAGGCACCACCTGGGTGAGCCAGATTCTGGACATGATCTACCAGGGTGG  
TGACCTGGAGAAGTGTACCGAGC

>1458

GTGCAAGGGGAGTGGAGGAAGACAGGGCTGGGGCTCAGCTCACCAGACCTTCCCTG  
ACCCACTGCTCAGGGATGGAGACTCTGAAAGACACACCGGCCCCACGACTCCTGAAG  
ACACACCTGCCCCTGGCTCTGCTCCC

>1459

CCAAGAGATGAGCTGGCCTGGGGCAGGCTGTGTGGTGATGGTGCTGGGGTTGAGTCTT  
CTGCCCCCTGCAGGTGGTCTATGTTGCCCGCAACGCAAAGGATGTGGCAGTTTCCTACTA  
CCTTCTACCACATGGCCAAGG

>1460

TGTGGAGCCGAGGGGTGGTGGCTACAACGCACAGCAACCCTGTGTTGGCACCCCTTG  
CCTGCTTCTCCAGTGTCTACGGATCCTGGTACCAGCACGTGCAGGAGTGGTGGGAGC  
TGAGCCGCACCCACCCTGTTCTCTA

>1461

GAAGGGGACCCCTTTTACTTTTCTGAATCAGCAATCCGAGCCTCCACTGAGGAGCCC  
TCTGCTGCTCAGAACCCCAAAGGGAGATTCAAAGATCCTGGAGTTTGTGGGGCACT  
CCCTGCCAGAGGAGACCGTGGACT

>1462

CCTCCCCATAGGCACTCGGGGCCTCCCCTGGGATGAGACTCCAGCCTTGCTCCCTGCCT  
TCCCCCCCAGGCATGGCTGGGGACTGGAAGACCACCTTCACCGTGGCGCAGAATGA

GCGCTTCGATGCGGACTATGCGGA

>1463

TCTGTTTGCCACTCTGCCAGCCAGGCTGGTGGGGCTCTGTCTAGCCCATTATTCTCACA  
TTTCACCACAGGTCTGGTTACAGGATGGTCACTGGCCTTCCTGGCCTTTGAGCGCTACA  
TTGTCATCTGTAAGCCCTTCGG

>1464

AATCCAGGCATCTCAGCTCCCACCGCACTCTTGTGGAGAGTCCAGTGAGCAAGTGTTT  
GGTCTTTGCAAGTTCATCCCTGAGGGCCTGCAGTGTCTCTGTGGCCCTGACTGGTAC  
ACCGTGGGCACCAAATACCGCAGC

>1465

AAAAAAAAAAAAAAAAAGCATCCAGAGGGACAGGAAAAAGAGAGATGTGATGCTTTCC  
GTGCTCCACCCAGGTTGCAGCTCAGCAGCAGGAGTCAGCTACGACCCAGAAGGCTG  
AACGGGAGGTGAGCCGCATGGTGGTTG

>1466

GAGAATAAGGTCTTTTTTCCATACTTCTCATCTGCCAAGTTATCTCCAATTGTACCT  
TTCTCTCCAGTTCCAAGCTTGCATCATGAAGATGGTGTGTGGGAAGGCCATGACAGAT  
GAATCCGACACATGCAGCTCCC

>1467

TTCATTGAGTTTCTGTACACTGCTTCTTACCCAGCTCATATACTCATAACCTTCCCC  
TACCCTCAGGTGTGGGTTTTGCTACCAGGCAGGTGGCCAGCATGACCAAGCCTACCAC  
AATCATCGAAAAGAATGGGGA

>1468

GTCCAGACCCACCCCTGCCCTCAATCCTGACTAAGATCACAGCTCAGGCCTCTACCC  
TCTTTCCACAGTCCATTGTGACTGATGGAGGGAACTTGTTACCTGCAGAAATG  
GGACGGGCAAGAGACCACTTG

>1469

AGGGAGGGTAGAATGCTCGCAATGGTGTCTCTGGCTCCCACCCCATCTCACTCTGTC  
TTTCTTCCAGACTCACCCACGGCACTGCAGTTTGCAGTCTCGCGCGCAGGGCCTCCGCGTGT  
GGCATGACCTGACTGCACTGTTG

>1470

GATCCCTCCCCTCCATCTCTGGGGCTTCGGGTGTCCAGACCTGACTCCCCTCCCC  
TCCTCCCCAGCCTACTTCTCCCTGCAGGTGATCTCGGCGCGCAGGGCCTCCGCGTGT  
CGCCGCGCTCACCACGGGCC

>1471

GCGAGCCCCAGGCGGGTCCGGTTCGAGGACCATCCCGGCCGGCGGCTCATCCAC  
CCGCCACCGCAGGGTGAAGTGCAGCGAGTACTTCCCGCTGTTCTCGCCACGCTCTG  
GGTCGCCGGCATCTTCTTTCATGAA

>1472

CAGGGGCGCACGCGCTGGACCCCGGGACCCGCGCAGGGCGCTCACCAGGCCCGTGC  
GTACCTCTCGAGGGGCGGCGCCCTGTGCGGCCTGGTCTACCTGTTGCGCGCCTCC  
GCTACTTCCAGGGCTACGCGCGCTC

>1473

CCTGTGTGTTAAACATCAATGTGAAGTATTTCCAGGAAGAAGTTTCACCTGTGATTC  
CTTTCCCCAGAGCCCCACAGTCTTCGTTACAACCTCATGGTGTGCTGCCAGGATGGAT  
CTGTGCAGTCAGGGTTTCTCGC

>1474



GCTGAGTTCCTCACTTGGGTGGAAAGGTGATGGGTTCCGGGAATGGAGAAGTCACTGCT  
GGGTGGGGCAGGCTTGCATTCCCTCCAGGAGATTAGGGTCTGTGAGATCCATGAAGA  
CAGCAGCACCAGGGGCTCCCGGCA

>1475

AGCAGCCCTGTTCCCTGCATCTCCCTTAGAGGGGAGCAGGGCTTCACTGGCTCTGCCC  
TTTCTTCTCCAGTGCCCCCATGGTGAATGTCACCTGCAGCGAGGTCTCAGAGGGCAA  
CATCACCGTGACATGCAGGGCTTC

>1476

AGGCCAGGGTAGGAACAGCAGGGACGGCTGTGGCTCTCTGCCAGTGTATAACAAGT  
CCCTTTTTTTCAGGGAAGGCGCTGGTGCTCAGAGTCAACGGACAGACTTCCATATGT  
TTCTGCTGCTATGCCATGTTTTGT

>1477

AGAAAAGTCCTTAGGGAATAAACACAACACTGCACCCAGTGGAGCATTTACCCGTTTC  
CCTCTTCTCCAGAGCTTGTGAGCCTGCAGGTCCTGGATCAACACCCAGTTGGGACAGG  
AGACCACAGGGATGCAGCACAGCT

>1478

GTGGGGGTGCATGGTCTTGGGGAGGAGTGAGGCACCACCCGGGCCCCGTAACCAG  
TGTGTCTCTCCAGAGCAGGACAGGCTGCTTTGGTTTGTGACCTCCAGGCAGGACGGCC  
ATCCTCTCCAGAATGAAGATCTTCT

>1479

AATGTCCACTGGGGTCAGGCCTGGGAGGGACACTGGAGGCTTCCCTGAACAGGTGTG  
TCCTCCTTCCAGCCAGCTCGTGATGTGCTTCTCCTGCTTGAACCAGAAGAGCAATCT  
GTACTGCCTGAAGCCGACCATCTG

>1480

CTCAGCAGAGGCCATTGCTGTCTGTCTGCAGCCGTCTGTCTCTCCCTGACAGCCTCAT  
TTCCCATGCAGGGAATCTCGTGACATTTGGCCACAGCCTGAGCAAGACCTGTTCCCCG  
GCCTGCCCCATCCAGAAGGCGT

>1481

CCTACCCTGCCACCTGTTACAGGCCCGCCGCCAGGACCGCCGCGCTCACCCCG  
CTCCGTCCGCAGCTCGTACCTGGCGTCTGCTGACCTTCGTGCTGGCGCTGCCAGCGT  
GGCCCTCTGCACCTTCAACTCTA

>1482

GGCGCGGGGGCGGGGCGGACTCCGACTCACGGCTCACGCGAGCTCCCTCCCC  
GCTCTCTCCACAGCCCTACCCTGGGGGGACGGCAACCACACTCTGTTCCACAATAGC  
CACGTGAACCCTCTGCCACGGGCT

>1483

TATAATTTGGGTTCACTGTGGCTACTTGAACACTACACTGCAGCTAACTCTATCTTTGTT  
TCCTTCCAGGAATCAATGAATTTAGCGATGTTTTCGACTCCAGTGAAGATTATTTGT  
GTCAGTCAATACTTCATATT

>1484

GATGCTGGCACTCCTGAAGGGCACAGATGGGGTGACTCAGGAGGGACCTGATGGGAC  
CATCCCCCTGTAGGCATCCTGCCTGTGTACCACTCCCTCTTTGCTCTGGCCACGGAGGA  
CCTGTCTGCTGGTTCCCCCGAG

>1485

CCACCATAATGTCACTCCTACTGAGGGTGGGTTGCACTTTTCATCCAGGGTTCTCTCC  
TCTCCTCACAGCTCTTTTACTTCCCAATTGGTTTGGGCTGGAGAAGTGCCACCGCTT

CGGGCTACGCAAGGATTTGGCC

>1486

GGTCTGCAGGTTAACAAACAGGGCTTGAAGTTGGGTGGCCTCAGCTGATGCTCCCTGTG  
GCGGCCCCCAGCACCGCAGTGACCTGGTGAGTGGGCGCCTCCCCGTGGGCCTCAGT  
CTCAAGGAGCAGGGTGAGTGTCTCA

>1487

TTTGTGTGTGTACCCCGCGGGGACCCCTCCCGACGCTGAGGACCGGGTCCCTCCCTC  
CAACCCCTGCAGCTACAAGGCCTGCCTACCCCAAGCTGCGCGACCTGATCCAGGGC  
CTGAGCTTCGTGACGCGGAGGGCT

>1488

TCAGCCTTACCCCGAAGGGCGGGACCGGCACCCTCGGGTTTCACTGGGCTCTGACGCT  
TGTCCTCGCAGAGGCCGAGTTCCAGGGCTGCCCAGGGCTCTGTCGTTTCGTGGCGCT  
CGTGGACGGCTACTTCCGGCTGAC

>1489

AAAAGGAAGAAGGACTGAGAAGGAGAGTGTCTGTCGCTCAGTCCCACTCAGGGGCC  
ACTCTTCTTTCGAGAACCCCTTGGTCTGATTATAAGGGCTGCCTCATCCGGCGCAGC  
CCCACAGGAACCTTCTTCTGGTTG

>1490

TGAGTTAGCTAACCTTGGGGACTTTTCACCTCTGATTTCTGGTTTTTCTCCCTCATCCT  
CTCCCCATAGAAAAGTCCAACCTGATCGTGGTCCAGAGAGGTCACAGCCCACCCACAT  
CATCCTTGGTTCAGCCCCAATC

>1491

TGTCTCGCTTGGGCTGGGATCCTGCAGGAACCCCTCACTGGCCTTTCTGCTGTCCCC  
TCACCATTAGCATGAGAACCTGGGCCATGGGTCTTACCAAGATTTACCGGGGCTG  
TCGCCATGAGGTGGTGGATGGGG

>1492

GAGCACAAAATTTGGGATTATTGGAGTGGAAGAAACCCACGCATCTTCTCTCCCTCCC  
ACCTTCCCCAGTCATTCTGGAAGCAGCGAGCTTGATGAGCCAAGTGTCTGACCGGCA  
TCTCGTGCTGCTCCACGGCGTGT

>1493

GATGCCCCCAGATATATTTCCGGGAGTGCGCAAAGAACTAAACTTGAATACTGAGCAA  
ATATGGGCTGAGCACCATGGTGCAGGAATTTGTACACCTGGGGGCCATAGACATGTATC  
TGCGAAAACGTGGCCACCTGGTG

>1494

AGGAGTTTGCCAAACAGACTCTTCATTTTATCAAACCTCCCGGCATTTTCGTGTGTTT  
GGCCCCCTTAGGAGGACAAAGGCCTGCCCATGGCAATGTCTCTGCCCGAAGGTGCT  
CCTGGCTCGGGAGGGGGCTGATG

>1495

TGGAGGTGGAGGAGGGAGGGGCTGAACAGGGCAAGGAAGTGATCCCTGATCCCACT  
TTCATTCCCTCAGATGCTCACCGACAGGATCCCCTGGGTGGCCCCGAGTGTCTCCGG  
GAGGCGCAGACACTTAGCTTGAAG

>1496

ACATCCAGTCTGGGGAGATTGGGGTGGGTCTATTGGGTTGGGGATTACCGACTGCTCCT  
CTCACCTCAGAACTCCAATTTATGAGGACCGGCAGCAGCTGCCGGCCCCCAAGTG  
GACAGAGCTGGCCCTGCTGATTC

>1497

CAGGGCCAGGGTGGGTTGGAGAGGCAGGGCAGCATCCAGGTACCTGGACATCAGTGC  
CGCTATCCTCGAGGGCAACTTTGGCAGCGTGGAGCTGTGCCGCTATGACCCGCTAGGC  
GACAATACAGGTGCCCTGGTGGCCG

>1498

GGTCACGCTTGGGGGTACCTGCCGATTATCCTGGGATCCTCTCTTCAAGATCACAACG  
ACCCCCCAGGGCATGGAGTACCTGGGCTCCCGCCGCTGCGTGCACCGCGACCTGGC  
CGCCCGAAACATCCTCGTGGAGA

>1499

AGAGAGCGGGTCCCACTTACAGGACACCCCTCCAGGTGCCTCCAATACCCGCCACCT  
CCCACCCCGCAGGTGTCCAGGCGCTGATCCGCTCCTTACGCTCCACCGCCCGAACC  
GCTTTCAGAACCGAGTGC GCGAGA

>1500

GCCGGGGCAGGCGGGGCGGCTCTAAGGAGCAGCCAGCACCCCTTCTCATCAGACA  
CCCCACATCCAGGAGGACAATGACATCCCGTTGTACTGAAGGGCGGCATCGTTGAC  
AACATCCTGTACCGAGTGACAATGA

>1501

CTGTCAAAAAGCCTGGGATGTCCAGGGAGGGGATTAGGTCTCATTCTGTCTCCAACGCT  
TCCCTTTCTAGGCACTGTCTACAGCTTGTACTCCCTGGCTGGGCTCCTTCCCAGG  
AATTAAGACCAAGAAGCCTGGGG

>1502

GGGGTGGGAGAGCGGCTGGGGCGCCTCCGTGACTCAGCCCCGGCCTGTCTGGCCCT  
CCCGTCTCCGAGTTCTGGGAGGTGATCTCTGATGAACATGCCATCGACTCCGCTGGC  
ACCTACCACGGGGACAGCCACCTGC

>1503

CTGCATTATGGTGGTGACCACTGATGACCGTATACCTGGCCGTCGAGTGACCGGCTGTA  
CTGTCTTACAGGTCAGTGTGGGGCCGAAACAACCTGGGCCAAGGGACGCTACACCGA  
AGGCGCGGAGCTGATGGAGTCAGT

>1504

TGAGGCCTTGGAGGGTGGCCTGGGGACCTTGGACACAACCAGCCTGCCCTGACCCA  
TCCCTCCCTGCAGCTTGCTCCTGCAACGGCCATGCCCGCCGCTGCCGCTTCAACATGG  
AGCTGTACCGACTGTCCGGCCGCG

>1505

GCCCTACCCTCTGACTTCCAGATCCCCAGACAGGCTTCTGACCAGGCCCTTCCCAC  
CTCTGTCTCAGCCTGCGACTGTACCCGGTTGGTGCTGCTGGCAAGACCTGCAACCA  
GACCACAGGCCAGTGTCCCTGCAA

>1506

TGGGGGAGGGGGCTCTGGGAGGAGAGGGTGGGGAAAGGGAGTCTGTGCCAGCCTCC  
CACCTTACCCAGACTGTGACTCGCACTGCAAACCTGCCCGTGGCAGCTACCGCATC  
AGCCTAAAGAAGTTCTGCAAGAAGGA

>1507

TCCCGTGCCTCCCCCTACCGGGCAGGCCGCCCTTCTGACCCCGCCCCCTCTCG  
CTCTCCCCGAGCGGTGCAGGTGGCGGTGGGTGCGCGGGCGAGGCGCGGGCGCGT  
GGACACGCTTCCCGTGGCGGTGCT

>1508

CACAGTGAACATTTAGAAGCAAACCTTTGAAGGAGTATTTTTCAGCTGCCATTTATGCTT  
CTTACAAATAGAGTTTGAACAGCTGAGACACTTCTAAATTCAGAAGTTCATATGCTT

TGGAACATCGAAAGCAGCAGAA

>1509

GATTACTCTTTGATTTTTGTTGTTATTTGTTTTGATTATTTGATTTTTTTTTTTTCCTTT  
TGATTAGCTTGCTACTCCAGAAAAAGCTTCATAAGTTTGAGTTGGCCTGTTTGGCCAAC  
CTTTGCCAGAGACTGCT

>1510

CACGCCTCAAAGAAGAGTGCGGGGAAATTGCCAGTCGCCAAATCACTCATTCTTTTC  
ATTTTCTGTAGCTTGGAGGGACGGTTGAAGATGAGGAGCTGCAGCAGATTCTTGAT  
GATATCCAGACAAAGCGCAGCTTT

>1511

CTTCTCTGCAGGCCAGGTGACCCAGGGTTGGAAGTGTCTCATGCTGGATCCCCACTT  
TTCCTCTTGAGCAGCCAGACTGCCTCCGGGTCACTGCCATGGAGGAGCCGCAGTCA  
GATCCTAGCGTCGAGCCCCCTCTG

>1512

GACCTGGAGGGCTGGGGGGCTGGGGGGCTGAGGACCTGGTCCTCTGACTGCTTTTT  
CACCCATCTACAGTCCCCCTTGCCGTCCAAGCAATGGATGATTTGATGCTGTCCCGG  
ACGATATTGAACAATGGTTCCTG

>1513

CGTGTCCAGTTGCTTTATCTGTTCACTTGTGCCCTGACTTTCAACTCTGTCTCCTCCT  
CTTCTACAGTACTCCCCTGCCCTCAACAAGATGTTTTGCCAACTGGCCAAGACCTGCC  
CTGTGCAGCTGTGGGTTGATT

>1514

GGGCTGGAGAGACGACAGGGCTGGTTGCCAGGGTCCCCAGGCCTCTGATTCCTCAC  
TGATTGCTCTTAGGTCTGGCCCTCCTCAGCATCTATCCGAGTGAAGGAAATTTGCG  
TGTGGAGTATTTGGATGACAGAAA

>1515

GGCCTCCCCTGCTTGCCACAGGTCTCCCAAGGCGCACTGGCCTCATCTTGGGCCTGT  
GTTATCTCCTAGTTGGCTCTGACTGTACCACCATCCACTACAACATCATGTGTAACAG  
TTCCTGCATGGGCGGCATGAACC

>1516

TTTTTTAAATGGGACAGGTAGGACCTGATTCCTTACTGCCTCTTGCTTCTTTTTCTA  
TCCTGAGTAGTGGTAATCTACTGGGACGGAACAGCTTTGAGGTGCGTGTGTTGTCCTG  
TCCTGGGAGAGACCGGCGCACA

>1517

GGTGGAGGAGACCAAGGGTGCAGTTATGCCTCAGATTCACTTTTATCACCTTTCCTTGC  
CTTTTCTAGCACTGCCAACAACACCAGCTCCTCTCCCAGCCAAAGAAGAAACCA  
CTGGATGGAGAATATTTACCCT

>1518

GTAACCTGAACCATCTTTAACTCAGGTACTGTGTATATACTTACTTCTCCCCCTCCTCT  
GTTGCTGCAGATCCGTGGGCGTGAGCGCTTCGAGATGTTCCGAGAGCTGAATGAGGCC  
TTGGAACCTAAGGATGCCAGG

>1519

CAGGGAAAAGGGGCACAGACCCTCTCACTCATGTGATGTCATCTCTCCTCCCTGCTTCT  
GTCTCTACAGCCACCTGAAGTCCAAAAGGGTCAGTCTACCTCCCGCCATAAAAAAC  
TCATGTTCAAGACAGAAGGGCCT

>1520

CCCGGGGCGCGGCAGTGGGTGCCGAGCTTGCCCCAGCCCCGCGCCTCACCGCGC  
CCTCGCTCCGAGGCGCTCGTCTGGCGTGGCCGCTGAGGCTGGGACCGGCGGTGCC  
TTGTCTCTGGGTGCGCCAGCCGGAGG

>1521

CTGTGGGACCCTCGGGAGCCGGTGGGACGCAGGACCTGGGGCTAGGGCTGAGCATT  
CCCCATCCCAGGTCTGGTTCAAGAACC GCCGGGCAAATGGCGACACCAGAAGCG  
CGCGTCGGCTTCCGCGAGGCTCCTGC

>1522

ATGACCACGTTGGAAATTCTGGAACCTGGAATCTGCTGTATTCTAACATTGGCACTTT  
TTTTAAACAGCTGTTGTTGGCCTACTGTACCCCTGTATCGACAGTCACCTCGGAGAAC  
CCCACAAATTTAAGAGAGAATG

>1523

CCCTGTGGTTTTACGTTTTTTTATCTTAATAAGAGTCACCGAACTTTTCCTAACTTTTA  
TATACCAGAAATTGGATTTTGCCAATAATGTCAGCTGTCCTTACTTTAGCAGCCCTA  
TCTTTGGCCTTTGGTGA

>1524

GAGAATCTGTGATGTAGAATTGAGCCAGGTGAAATTGACTGCTAAGGTACAGTTTCTTT  
TCTCGCTCCAGGTATACGTCCCCAGATTTCTCTATATTCGTTCTTGGCTCCCTTGATAT  
TTTTCTCAGGAGGCGTCACG

>1525

TGTAATTAATATTTATACATTTAGTGCTAATTTCTCTTTCTTTTTTTTTCTTTCT  
ACACATAGGGTGTTCCTGAAAAGCCCCATAGTGATTGAGTCTTCAAACCACCGATTCT  
GAGAGCAAGGAAGATTTTG

>1526

TTCAGATTTTCTTATTCCAAGGCCTTAAACTGTTACCTCACTGAAACCTTTGTGTTT  
TTGTCCTTAGTGATATTGACCAGAGTTTCGACAAAGTAGCTGAACGTGTCTTAATGAGA  
CTACAAGAGAAACTGAAAGGA

>1527

AGCATTTAATTCTAAGTGATTTCCCATGACTTACAGTTTCTGTTTTTTTCCCCTTTT  
TCTATTTAGTTACCTACATCTCATACTTGCTTAAATGTGCTTTACTTCCGGAATACTCA  
AGCAAAGAAAACTTAAA

>1528

GCTTCTCAAAGTGCTGGGATTACAGGTGTGAGCCATCGCGCCCGCCAATTGTTGCTTC  
TTTTTCAACAGGAGTGTGGGCTGCTGCTCTCCTCTGAGGGCGAGTGCAGGGCTGCTA  
CCCGCTGGATGGGCACATCTTGT

>1529

AGGGCTCTGGCGGGGGCGGCCTCCAGGTTCTGCTCCCCAGCCCTGGTCCGACGGTGC  
CGTTCTCCCAGCCCTACAGACGCTGCGCGGCTGGGACTCTGTGGACAGGGAGGTG  
GCCGAGATCCGGCAGGAGGATGAGGC

>1530

GCCGGGCGTGGGTCTGGCGCCGAGGCCGCTCCTCCGGGCAGCCGCCAGCCCCGC  
GCTTGCTTGCAGATCTACTACTACGCGGACCAGATCTACCTGAGCGCCGGCGTGCCG  
GAGGAGCACGTGCAGTACGTGACGG

>1531

CCCATTGGAGGGGGCTGGAGGGAGGTGAAGCTGGGCCTCTCCCGCCTGAGCCCTGC  
CACCTCCTGTAGGTGTTGTTGGTGGAGCTCCTGGGTCGGAGGCTGCTGCTGCTGCTG

GGCTTCTCCATCTGCCTCATAGCCT

>1532

GGCCGCCCCCTGGGGTCCCCGTCCTACGCTTTGTCTGCTCCAGGTGAACCAACTGCTT  
TCTCTCCGACAGGACACAGTGTCTGGATGCCATACATCAGCATCGTCTGTGCATCTC  
CTACGTCATAGGACATGCCCTCG

>1533

TCTGCATGGCCAGGCTGGGATGCTCGGGCCGCTCTGCCTTCAGGGAGGCTGCTCTC  
CTCCCCCTACAGGTCCCATAACCGCGCTGCTCATCACTGAGATCTTCTGCAGTCCTCT  
CGGCCATCTGCCTTCATGGTGGG

>1534

CCCCATGCAGTACAGTGCAGCCCTGGGCAAACCACGTCCCACAGTGTACCTGCC  
CTTTCCCGTAGGAGGGCTCGGCCGTACAGCTTCATTGTCTTCGCCGTGATCTGCCT  
CCTCACCACCATCTACATCTTCT

>1535

GGGAGAGAAGGGAAAAGCCCTTGAGGGCCAGAAGAGAAGTCAGATCTTCTCCTCTC  
CCAAAACCTCCAGTGTATGCCACGTTGAGGGACCTGAAAACACAGGGCCGGCTGTGG  
GAGGCGGCCCGGCCCTGGCATGCC

>1536

TGGAGCATGAGGGGACAGGCCGTGCTGAGGGTGATGCTGAGGCGGGCTGGTTGGGCC  
TCTGTCCCCGAGTGTGTAACACAGGCCTGGGCCTGCTGGGGCCGCTGGGGGAGGAC  
GCCGTGGCCTCTGACTGGATGTGAA

>1537

GAGGGGCACTGCCTGCCGGGGATGACCCCTGGCCGCTGCGCCTCAGGAACCTCAT  
CTTCCACCCAAGGGCTGCCTTCAATGACGTTTATTGCGCCAGCAAGTTCGCGCTCGA  
AGGCTTATGCGAGAGTCTGGCGGT

>1538

CTGGGGCAGGAGATGGGACTTGGGCCTGGGTGCTCCGTCCCTGCCACTTGCGGCTC  
TCGGGCCAGCAGCGTGAGCCTGATCGAGTGCAGCCCTGTGGACACCGCCTTCATGCAG  
AAGGTGTTGGGCGGTCCCGACCAG

>1539

TTTCCCTTGTGCTGGATCTTGCCCTGCCCTGAGTTTCTCTTTTTTGATCTGACCCCTGC  
TGTCTCCTAGCTGTCGCCATTCCCCTTGACCTCCTGCTGAAGGAGGTGCAGAAAGTACC  
CCAATGCTGAGCTGGCCTGGT

>1540

TCAATCCCTGATCACTGGGAGTCATCATGTGCCTTGACTCGGGCCTGGCCCCCATCT  
CTGTCTTGACAGACAATGCCGCTTCTGTCTCGTGGGCATCCTCCTGCTGGCAGGCCT  
GTGCTGCCTGGTCCCTGTCTCC

>1541

TTTCTTATTCTGCTACACTCTTCAAACCTTCACTCACCCCTGGTGATGCCACCTTCCC  
CTCTCTCCAGGCAAATGGGAGAGACCCCTTGAAGTCAAGGACACCGAGGAAGAGGAC  
TTCCACGTGGACCAGGTGACCAC

>1542

CACTGTGGTGGGTCCCAGAAGAACAAGAGGAATGCTGTGCCATGCCTTGAATTTCTTT  
TCTGCACGACAGGTCTGCCAGCTTACATTTACCAAACCTGTCCATTACTGGAACCTATG  
ATCTGAAGAGCGTCTGGGTCAA

>1543

GTGTCCACGTGAGCCTTGCTCGAGGCCTGGGATCAGCCTTACAACGTGTCTCTGCTTCT  
CTCCCCTCCAGGCCGTGCATAAGGCTGTGCTGACCATCGACGAGAAAGGGACTGAAG  
CTGCTGGGGCCATGTTTTTAGAGG

>1544

GCACAGGAGCCTCCCGGTTCCGGGGTGGGCTGCGCCCGTGCTCAGGGCTTCTTGTC  
TTCCCTTCCAGGGCGTGATGGTGGGCATGGGTGAGAAGGATTCCTATGTGGGCGACG  
AGGCCAGAGCAAGAGAGGCATCC

>1545

ATGTCCCCCGTCTGGCCTGGCTGTCCCCAGTGGCTTCCCCAGTGTGACATGGTGCATCT  
CTGCCTTACAGATCATGTTTGAGACCTTCAACACCCAGCCATGTACGTTGCTATCCAG  
GCTGTGCTATCCCTGTACGCCT

>1546

TGCCTGACATGAGGGTTACCCCTCGGGGCTGTGCTGTGGAAGCTAAGTCTGCCCTCA  
TTCCCTCTCAGGCATGGAGTCTGTGGCATCCACGAAACTACCTTCAACTCCATCATG  
AAGTGTGACGTGGACATCCGAA

>1547

GTGGGGTCTGTGGTGTGTGGGGAGCTGTCACATCCAGGGTCTCACTGCCTGTCCCC  
TTCCTCCTCAGATCATTGCTCCTCCTGAGCGCAAGTACTCCGTGTGGATCGGGCGCTC  
CATCCTGGCCTCGCTGTCCACCT

>1548

GGGCTCCTGGGTTCTGCGTTGCGGGGTGGGTTGCGGTGTCGCCGGCGAGGCTGACGGAT  
CGTCCCCTGCAGGGCGTCATGGTGGGCATGGGCCAGAAGGACTCTACGTGGGCGAC  
GAGGCCAGAGCAAGCGTGGCATCC

>1549

TTGTGGCGTGTGAGCATGGGGTGGCCGTGGGTCTCTGTCCCTGACTAAGCCGCCCTT  
GTCCCTTCTCAGATTATGTTTGAGACCTTCAACACCCCGCCATGTACGTGGCCATCCA  
GGCCGTGCTGTCCCTCTACGCCT

>1550

GTGAGCTAAAGGTTTCTACTCTTTCATCCTCGGTGACACAGCATCACTAAGGGAGGGC  
TCTGTCCCCTAGGTATGGAATCTTGCGGCATCCACGAGACCACCTTCAACTCCATCATG  
AAGTGTGACGTGGACATCCGAA

>1551

TCTGCCTGGCTCGGGAGAGCTGACTGGGGGGCGCTCTGCGAGCTGAAGCCGTGCCTG  
GCTGTCTTTGAGATCATCGACCCCCAGAGCGCAAGTACTCAGTGTGGATCGGGCGGC  
TCCATCCTGGCCTCACTGTCCACCT

>1552

CCATCCTGGCCTGTCAGGCCTGCCTGGATCCTGCCCCGGGTTGGTCCACCACTCACTGT  
TTTGTTCAGGAGGAGAGGGATCGCCCTCCAGCTAACACAGCAGAGGGGCTGCTG  
AACGTCATTGGCATGGACAAGCCG

>1553

TGTCATTTGCTCCTGGAGCTCCCAAGGGACTTGGGGAAGGTTGTTCCCAACCCCTTTC  
TTCCCTTCCAGGGGCTGCCGGGAGGCTATCAAAGGATCGCCTATGAGTTGTAGAG  
ATGAAGGCCAAAGAGGGCGTGGTG

>1554

CCCAGTCCCAGAGCTGCCCTTTAGGCCTTCCTTTGCTCAGGCCCATCCCTACTCCTC  
TCCTCACACAGAGGGGACCTCACCCAGACGAGGTGGTGGCCCTAGTGGGCCAGGGC

CTGCAGGAGGGGGAGCGAGACTTC

>1555

AGCAGGCAGGTAGGCTGGGAGGTCTCTCCATGGTGCTGGTGACAGAGCCTGGGTGGG  
CATCTGCCACAGACTGGTCCCCAAGGTGGTGGAGCTGTGTAAGAAGTACCAGCAG  
CAGACCGTGGTAGCCATTGACCTGGC

>1556

CAGCATGGTCAAGGCAGGCTGCCGGGGCCCTCCCGCTAGGGCACCCATGACCTGGCTC  
TCCCCCTTCAGGAGGCTGTGAAGAGCGGCATTACCGTACTGTCCACGCCGGGGAGG  
TGGGCTCGGCCGAAGTAGTAAAAG

>1557

GCCTGGGCTGGCCATGGGGTCCCTCCTCACTGCCTCCTCCATACTTGGCTCTATTCTG  
CTTCTCTACAGGCTGTGGACATACTCAAGACAGAGCGGCTGGGACACGGCTACCACAC  
CCTGGAAGACCAGGCCCTTTATA

>1558

CGTCAATGTGTTCTGACTATTTATGTAAGAGTAAAAGGAGGCTGATTCTCTCCTCCTCC  
CTCTTCTGCAGGCTCAAAAATGACCAGGCTAACTACTCGCTCAACACAGATGACCCGC  
TCATCTTCAAGTCCACCCTGGAC

>1559

TCACTACATTGCTAAGAGCTGCCTTCTTTGTTCTCTGGTTCCATGTTGTCTGCCATTCTG  
GCCTTTCAGAACATCAATGCGGCCAAATCTAGTTTCTCCAGAAAGATGAAAAGAGG  
GAGCTTCTCGACCTGCTCTATA

>1560

AGTCGAAAAACACAATTTTAGTTGTCTTAAAGGTATCATTTAAACTTAGTATGTTGCTT  
CCTTTTACAGCATTGAACTGTTGTAAGATTTAATTCAAAAGAGAAAATAATGTCCAT  
CCTGTCGTGATGTGATAGGAG

>1561

AACTATACTTGAGAAAATAAGCTTGCTGCAGGCTGTTTCTTAAGGATTCACACGTAT  
TTTTGTTTTCAGGGCTACCATATTTTTGCCCAGTTTGTTCAGAAGCCACTTACAAGGA  
AGTAAGCAAAATGGTGAAAGAT

>1562

TTTCATGTGTCTTATAGATTTTTAAAGCAAAGTTAGTTGTCTTCTCCAAACATAAAAATA  
TTTCTTATAGCTACCTGCCTTCTGGAAGAACTTTGCCATGAGAAAGAAATTTGGAGA  
AGTACGGACATTCAGACTGCT

>1563

TCCAGTTCCAAGCAGTAGTAGTCCTATTTTTAGGTGTTTATAAATCTTCTAGCTCTATTTT  
ATTTACAGATTCAATTTATGAGATAGCAAGAAGGCATCCCTTCTGTATGCACCTACAAT  
TCTTCTTTGGGCTGCTCGC

>1564

CTAAATATTAGAGCTTGTAAGAAAATGTTAGTATATGCTTTCATGACATTTGTTTCTCCT  
TACATCTAGGCAGCAACAGTTACAAAAGAATTAAGAGAAAGCAGCTTGTTAAATCAAC  
ATGCATGTGCAGTAATGAAAA

>1565

ACTCTATAAATTCTATTTTATTTTGACAGATAACCAAGAAATTAATTTCTAATTTCTTTTTT  
TTCCCTAGAAGTACTAACTGAGTCAGAAGTTTACCAAAGTTAATTTTACTGAAAT  
CCAGAAACTAGTCCTGGAT

>1566



AAAGCTGGCTTTGAGATCCTTTATTAAAGAATAAATCTTTAAAACCTATACTTTATTTTCC  
CTGTTGCAGGAAAAAATCATGTCCTACATATGTTCTCAACAAGACTCTGTCAAACA  
AAATAACAGAATGCTGCAAAC

>1567

CTGGAGAAGTGATGGCTCCTTTTGTCTCTTAGTTCCAATAACTTGAAATATTTTCTCCA  
CATATTTAGTTTTGTTTCATGAATATTCAAGAAGACATCCTCAGCTTGCTGTCTCAGTAA  
TTCTAAGAGTTGCTAAAGGA

>1568

ATCAATTTTATATACAAAGTTATGCATCCAAGAAAAGAAAAATGTATATGTAATAATTCTT  
CATTTTCAGGAAGAAGAATTACAGAAATACATCCAGGAGAGCCAAGCATTGGCAAAGC  
GAAGCTGCGGCCTCTCCAGA

>1569

GAGAAGAAGCAAGGCGGCTAAAAACTCATGAATGACTCAGCAGGACTTAGTTAAAAA  
ATGCTTCTTTCAGTTTTCTCGTTGCTTACACAAAGAAAGCCCCCAGCTGACCTCGTCG  
GAGCTGATGGCCATCACCAGAAAA

>1570

CTGAAAACTGAACCAACTTTGTGACTAATGCCAATCTCCTTACTTTTTTTTCTCATT  
TCCTAACCAGGCTGACATTATTATCGGACACTTATGTATCAGACATGAAATGACTCCAGT  
AAACCCTGGTGTGGCCAGT

>1571

TAGGAAGGCTGTAGAAAAATAGCATTGCATAACAGACTTCTCTTGTATTTTGTGTTT  
TAAATCACAGGTTTCTCATTAACTTGTGAAGCAAAGCCACAAATAACAGAGGAACA  
ACTTGAGGCTGTCATTGCAGAT

>1572

TAATAGAACCAGTTACTTACTGCACCTATTAGTTTAAATTAGTATTTAATATATTTTGTCA  
TATTGCAGGGGAGAGAAGACAAAACGAGTCTTTCATTGGGTGGAACCTTCTCTTT  
AATTTAACTGATTTAACAC

>1573

GGGGTGGGATGAGGGCTGGAGCTGTGGGGGCAACTGATAGTCACCATCCCCCTCCGTCC  
GTTGCCCGGTAGTGCTCTTGTGTTGACATGTGGCCAGGTGCTGATGCTGGACAATGG  
GCTCCTGCAGACACCACCCATGGG

>1574

AGCTGAGGCAGGGTGTGGGTGAGGGCCGGGCTGGGTCCCTGAGCTACCCATCCCTCT  
GCCCTCACTAGTGAACAGCTCTTCATGGAGATGGCTGACCGGATGGCACAGGATGGA  
TGCGGGGACATGGGCTACACATAC

>1575

GGTCAGATATGCCTTGAGGAGGCTCCTTGAGGGTCTGCTTGAGCCCACTGTGTCCTC  
AAACCCCAACAGTTCACTCCCTGGGCCTGAAGTTGGGTATCTACGCGGACATGGGCA  
ACTTCACCTGCATGGGTTACCCAG

>1576

AAAGGTCTGCTAAGGCCCAAGACTGCCTCCTGCACTTCTCAGGACTGAAACAGGTTG  
GGCTTCTCTAGGGTACCCCAAGATGGCTGCTGCCCTGAATGCCACAGGCCGCCCAT  
CGCCTTCTCCTGCAGCTGGCCAGC

>1577

CTCCTGTGTGGGTCCCTGGGCTGCAGCGTGTGATTCTGGTGTGGACTCTGCCTTCCC  
TCGACATCCAGGTGAACTACAGTCTGCTGGCGGACATCTGCAACCTCTGGCGTAACTAT

GATGACATCCAGGACTCCTGGT

>1578

TTTGGGGATGGTCCCTGTGTCTACCTCCTTGAGGAGATGAGAGCTGACTACTCCTCTTC  
TCTGCCCCCAGCTGCTCATTGGGAATTTGGTCTCAGCTTAGAGCAATCCCGGGCCCA  
GATGGCCCTGTGGACGGTGCTGG

>1579

GGGCCAGGGAGGCAATGGTAGGTCCTGTCTGAGCAAGGGACCCCAGCCAGTAGCCAC  
CTTCTGTGCCCAGGAAAAATCTCTCATCGAAGGTACATGCGGCCTCTGTCCAACAAG  
GCTAGCGCCTTAGTCTTCTTCAGCT

>1580

ATCCTCTAGCGGGGGGGTCTCTGTGCCCACTCTCATGGTGGCATTGGTGATGTCCCT  
CCCCACTGCAGGCCCAGGACGTCTACTCAGGTGACATCATCAGTGGCCTCCGAGATGA  
AACCAACTTCACAGTGATCATCA

>1581

AGACCCTGGCAGCCCCTGTTCTCCTGGGACCCTGTGTCTCGGGTTTATGAATGGGT  
GGGCGTTTGCAGGTGGGCCTGGCTCAGGGAAGGGCACCCAGTGTGAGAAGATCGTGC  
AGAAGTATGGCTACACCCACCTCTC

>1582

GTGACGAGAGGCTGGGAGAAGGGATGGGGAGGAGAGGCTCATGGCCCCTCCTCCTT  
TGCTGTGCCCCAGGAGACAGTGTGGACATGCTCCGGGATGCCATGGTGGCCAAAGTC  
AATACTTCAAAGGCTTCTGATTG

>1583

TGGGAAGATGGGGAGGACATGGCCCTAGGGGGCAGGAATGGGGTCCCTGTGACATGG  
TGCCCGCCTGCAGATTGGACAGCCACACTGCTGCTGTATGTGGACGCAGGCCCTGAG  
ACCATGACCCAGCGGCTCTTGA AAC

>1584

TGGGGCCTGCCATGGTGAGGCCACCCCACTCCACCTGGTGA CT CAGCCTCAGGCCCC  
ATCTCCCCACAGGTCAACGCTGAGGGCTCCGTGGACAGTGTCTTCTCCAGGTCTGCA  
CCCACCTGGACGCCCTAAAGTAGC

>1585

TCCAGAGTTGAGGGTGGGTGAGACCACGTGCTCATGGCTCTTCTCACTGTGCCCTGC  
CCCCTGACTAGGCGGTGCCTCGGGAGGAGCTGTTTGTGACATCCAAGCTGTGGAACA  
CCAAGCACCAACCCGAGGATGTGG

>1586

GGCTGGATGGGCAGGTAGGGTAGAAGCCTGGCATTGTGTCCACACTTGGTGGGGCTG  
TCTCTCACTCAGGCGGGGAGACAACCCCTTCCCAAGAATGCTGATGGGACTATATGCT  
ACGACTCCACCCACTACAAGGAG

>1587

ATGCATGTCTGGATGGGCCAAGCAAGTCTGGGTGTCA CCACTTCATGGTGATGGGTTAT  
CTTTGGCTCAGGTGGAATGCCACCCATACTTGGCTCAA AATGAGCTAATTGCCCACTGC  
CAAGCACGTGGCTTGGAGGTAA

>1588

TGCATGGGGAACAAAATAGTGCTTATGAATACTGACCCCTTTTCTCATCTGTCTAATCC  
CCCAACTTAGGTGGCAGGTCCAGCGGAAAGTGATCTGCATCCCCAAAAGTATCACTCC  
TTCTCGAATCCTTCAGAACATC

>1589

AGGCAGTGTGTGGAACCCAGCTTCTGCTCACAAAGCTGGCTTCTTGAACCCACT  
CTCCATCCTCAGGTGTTGACTTACCTTTAGCCCAGAAGAGATGAAGCAGCTAAATG  
CCCTGAACAAAAATTGGAGATATA

>1590

GGGAAGATGCCTGGAGTCTTTGGAATGGCAACTCCTGCTGATGGAGTAATCTATCTGTC  
TCTCTTCCAGGTGGATGGGAAGAGAGTCCCAAGGGATGCAGGGCATCCTCTGTACCC  
CTTTAATGACCCGTAAGGAGACC

>1591

CCGGTGTGCCATGACCCAGGCCACCCCTTTCCTGCCTTTCTACTCATGGCTTCTCCTG  
ACTGTCCCCAGGAGTTGTGCCCTGCTGTTGGTTCTGCACTGGAAACATGGGGCGGGG  
AGCCCCCTCCCATCACCCCTGT

>1592

CCCAAAGGGTTGGCGGCAGGGCTGGGACACTGACCCCTGACTCCCACGTACCTCCC  
TTCTGCCCTCAGTACACAGCCAGGGGGAGCCGTTCCCAACAACCTGGACAAGCTA  
TGTGGCCCCAACGTGACGGACTTCC

>1593

TACACACACACACACACACACACCACCCCCAGCCCAGGCTGACCTGATCTTTGCTCT  
CCCCCTGGCCAGTTGAGGAGGAGAACCCGGACTTCTGGAACCGCCAGGCAGCCGAGG  
CCCTGGGTGCCGCAAGAAGCTGCA

>1594

CGGCGCCCGGACCCTCAGTGGTTCCAGGACAGCCCTGGGGAGCAAGCCTCACACACT  
TCTGCTCCTCAGGGATGGGGGTGTCTACGGTGACAGCTGCCAGGATCCTAAAAGGGC  
AGAAGAAGGACAAACTGGGGCCTGA

>1595

TCCAGAGGACAGAGATCAGGGTCTGTTTGTCTGCCCCAGAGAAGAGCTCAGAGTG  
TCTCTGTCCCAGACATACAGTGTAGACAAGCATGTGCCAGACAGTGGAGCCACAGCC  
ACGGCCTACCTGTGCGGGGTCAAGG

>1596

TGGGGCCCGGCTGTGGGGTCAGGGCCAGTGACAGACCTCTATCGCATATCCTGACCTC  
TATCACCTCAGGAAAGTCAAGTGGGAGTGGTAACCACCACACGGGTGCAGCATGCCTC  
GCCAGCCGGCACCTACGCCACAC

>1597

CTCTGCATGAGGAGGGGACACGGGGCCTAGCCATGGCCAAAGTCCACCTGCCCCATC  
CTCTGTTCCAGGTGATCCTAGGTGGAGGCCGAAAGTACATGTTTCCATGGGGACCC  
CAGACCCTGAGTACCCAGATGACT

>1598

CAGCAGGGGGAGGGCAGAGGTGTGGGGCTCGGGGCTGTGGGCTGAGGCCTGGCTCTC  
TCCCTCCCCGAGGGTGCCCGGTACGTGTGGAACCGCACTGAGCTCCTGCAGGTTCC  
CTGGACCCGTCTGTGACCCATCTCA

>1599

CTGTGTGCACATCCGCCAGCACCCCTCCACCCCCAGCCTGCCAGTCACCACAGGACCC  
CTTGTCCCACAGGTCTCTTTGAGCCTGGAGACATGAAATACGAGATCCACCGAGACTC  
CACACTGGACCCCTCCCTGATGGA

>1600

CCCTGGGAGTGGGGGGTTGGGGTTGGAGCAGGGCAGGCTCAGCATCTCCCCCTCT  
GGCCTCCTGCAGGTGGTGCATCGACCATGGTCATCATGAAAGCAGGGCTTACCGGG

CACTGACTGAGACGATCATGTTCGA

>1601

TGGCGGGAAGGGGTACCTCTTGTCTGCCTGGAAGTAACTTCTACTGAACTGAA  
CCCTCCAACCGAGGAGCCCCGAGTATCGGCAGCAGTCAGCAGTGCCCCTGGACGGAG  
AGACCCACGCAGGCGAGGACGTGGC

>1602

CCCAAGCTGTTCCACACACAGGGCACCCCTCAGCCAGGCTGACCTGATCTCTACTCT  
CCCCCTGGCCAGCTGAGGAGGAGAACCCGGCCTTCTGGAACCGCCAGGCTGAGG  
CCCTGGATGCTGCCAAGAAGCTGCA

>1603

GGCACCCGGGACCTTCAGTGGTTCCAGGACAACCCTGGGGCCCAGGACTCACACATT  
TCTGCTCCTCAGGGTTGGGGGTGCCACGGTGACAGCCACCAGGATCCTAAAGGGGC  
AGAAGAATGGCAAACCTGGGGCCTGA

>1604

CAGAACCAGGTCCTTGGTTGGGGTCTGGGTGCCGCCCCGAAGTAGAGCTCAGGGTG  
TCTCCGTTCCGACACATAAATGTGGACAGACAGGTGCCAGACAGCGCAGCCACAGC  
CACGGCCTACCTGTGCGGGGTCAAGG

>1605

TGGGGCCCCTGTGGGGTCAGGACCAGGCCAAGATCTCGGTCACCGATCCTGACCTC  
TGTCACCCTCAGGAAAGTCAGTAGGAGTGGTGACCACCACACGGGTGCAGCACGCCT  
CGCCAGCCGGCACCTACGCACACAC

>1606

GGCTATGCATGAGGAGGGGGCACGGGGCCAGCCAGGCCCCCAAACCACCTGCCCCAT  
CCATTGTCCTCAGGTGATCCTTGGCGGAGGCCGCAAGTACATGTTTCCATGGGGACCC  
CAGACCCTGAGTACCCAGCTGATG

>1607

GGCACGGCAGGGGGAGGCCAAGTGTGTGGGTCTCAGGGCTGTGGGCTGAAGCCTGGC  
TCTGTCCCTGCAGGGTGCCTGGTATGTGTGGAACCGCACTGAGCTCATGCAGGCGTCC  
CTGGACCAGTCTGTGACCCATCTCA

>1608

CTGTGTGCCCATTTGCCAGCACCTCCCGCTCACAGCCTGCCAATCACCACCAAGCTC  
CTTGTCACAGGCCTCTTTGAGCCCGGAGACACGAAATATGAGATCCACCGAGACCC  
CACACTGGACCCCTCCCTGATGGA

>1609

CTGGGGAGTGGAGGAAGGCGGGGCGGGCAGGGCAGGTTCAAGCATACCCCCCTCT  
GGCCTTCTGCAGGCGGCCGATCGACCATGGTCATCATGAGGGTGTGGCTTACCAGG  
CACTCACTGAGGCGGTCATGTTTCA

>1610

TGCCTGGCACATAGGAGGCACTCCACAGCTGTGGTCAGCTCAACTACAGGGACCCGC  
ATCTCCCTACAGGGTTGGCCCCAGCAAGGCTCAGGACAGCAAAGCCTACACGTCCAT  
CCTGTACGGCAATGGCCCCGGGCTA

>1611

CAGGGATGGGGGCATTCGCGGGAGGGGACGCCGCTGCCTGCCCTGAAGTGCACTC  
ACCCTCTACCAGGGAGCCCCGATTACCAGCAGCAGGCGGGTGCCCTGTCGTCCG  
AGACCCACGGAGGCGAAGACGTGGC

>1612

CCCTACACAACACACACACAGGGCACCCCCAGCCCAGGCTGACCTGATCTTTGCTCT  
CCCCCTGGCCAGTTGAGGAGGAGAACCCGGACTTCTGGAACCGGAGGCAGCCGAGG  
CCCTGGGTGCCGCAAGAAGCTGCA

>1613

CGGCGCCCGGACCCTCAGTGGTTCCAGGAGAGCCCTGGGGCCCAAGCCTCACACATT  
TCTGTTCTTCAGGGATGGGGGTGTCTACGGTGACAGCTGCCAGGATCCTAAAAGGGC  
AGAAGAAGGACAAACTGGGGCCTGA

>1614

GAGGACAGAGATCAGGGTCTGGGTCTCCGTGTCTGCCCCAGAGAAGAGCTCAGAGTG  
TCTCTGTCCCAGACATACAATGTAGACAAACATGTGCCAGACAGTGGAGCCACAGCC  
ACGGCCTACCTGTGCGGGTCAAGG

>1615

TGGGGCCCGCTGCTGGGTCACGGCCAGGTCACAGACGTTGGTCACATATACTGACCTC  
TGACACCCTTAGGGAAGTCAGTGGGAGTGGTAACCACCACACGAGTGCAGCACGCCT  
CGCCAGCCGGCACCTACGCCACAC

>1616

GCTGTGCATGAGGAGGGGGCACGGGGCCAGCCAGGGCCCCAAATCCACCTGCCCCAT  
CCTCTGTTCCAGGTGATCTAGGTGGAGGCCGAAAGTACATGTTTCGCATGGGAACC  
CCAGACCCTGAGTACCCAGATGACT

>1617

CAGCAGGGGGAGGGCAGAGGTGTGGGGCTCAGGGCTGTGGGCTGAGGCCTGGCTCTC  
TCCCTCCCACAGGGTGCCCGGTACGTGTGGAACCGCACTGAGCTCATGCAGGCTTCC  
CTGGACCCGTCTGTGACCCATCTCA

>1618

CTGTGTGCACATCCGCCAGCACCCGCCACCCCCAGCCTGCCAGTCACCACAGGACCC  
CTTGTCCCACAGGTCTCTTTGAGCCTGGAGACATGAAATACGAGATCCACCGAGACTC  
CACACTGGACCCCTCCCTGATGGA

>1619

CCCTGGGGAGTGGGGGTTGGGGTTGGAGCAGGGCAGGCTCAGCATCTCCCCCTCT  
GGCCTTCTGCAGGTGGTGCATCGACCATGGTCATCATGAAAGCAGGGCTTACCGGG  
CACTGACTGAGACGATCATGTTCTGA

>1620

CGGTGCCTAGCACGTGGGAGACACTCCACAGCTGTGTTTCAGCTCAACCACAGGGACC  
CCTCTCTCTGCAGGGCTGGCCCTGGCAAGGCCCGGGACAGGAAGGCCTACACGGTC  
CTCCTATACGAAACGGTCCAGGCTA

>1621

CGGGAAGGGGTCACCTCCTGTCTGCCTGGAAGTGAATGAACCCTCCTACCGGAACTGA  
ACCCTCCAACAGGGAGCCCGAGTATCGGCAGCAGTCAGCAGTGCCCCTGGACGAAG  
AGACCCACGCAGGCGAGGACGTGGC

>1622

ATTTTTTCAGGCAGGATGCATATTATTTATTAATCACTCCTCTTTTTCTCATTTAATAT  
AACTGCAGGAGCCCCTAATGGAAGAATATGCTATTGCTGCACAAGTCTTCAAGCTGAG  
CACCTGTGATATGTGCGAAG

>1623

AGAATGCAATTATTGTCTATACCAGGGTGAAAAGAGACAACAATCATTCTGCCATCCTT  
TTCTCTTATAGGAGAAAGTAAAGTTTCTGGGCGACAATTACCTTGAGGAAGGCCCTGC

TGAAATGATATCCGGAGGACAA

>1624

TGCTCACTCCTCTTGATTTCTCCAAGTCAGTGAGGTTATCCCTTCCCTGTATTTCC  
TTTTCTAAAGAATTTGCTGGACCATTTGGAAGAAAAGATGCCTTTAGAAGATGAGGTC  
GTGCCCCACAAGTGCTCAGTG

>1625

AGATGGCATAAGCTCTTCTTTCCCTTCCCATGGTTATAACTGTCCCTGTTGGCTTCC  
TTCTGTGAGGTGCAGCATGCCAGCAAGCAGATCACTGCAGATAAGCAATACAAAGGC  
ATTATAGACTGCGTGGTCCGTA

>1626

TTAGGGGATGTGGGGAAAGGAAGTCAGTAAACTTCTGCTTTTTGGTAAAGATCTCTT  
TCCTATTCTAGGAATGCTTCCGGATCCAAGAACAACACTCACATCGTCATCAGCTGGATG  
ATCGCACAGACTGTCACTGCTGT

>1627

TTTAGCCTAGTGAATCTTAGGATTTTTCATCGGCCTTCAGTCACTAACTCCACGTCTTTA  
TTCTTTGCAGCTGACATCATGTACACAGGCACGCTTGACTGCTGGCGGAAGATTGCTC  
GTGATGAAGGAGGCAAAGCTTT

>1628

TCTGCCCCACCTCTTGATTGCTTTCCCTTTTCTTATAGTTTTTATGCTAATTCTGTTTCAT  
TTCTATAGGCGAGGAGGAGCATGATCAGGAAGGCCGGTGATTGTGGCTGAATTTGAC  
TCGTTTGTGCTGGTAACAGC

>1629

AGCTCAGAGCTGGAGCAGAGGGGCCACACAGGAGACGGGGCCTCATGAATTGCTCTC  
TGTTACCACCCAGGAGCCAGGGCTGAGGTGCTGACCAGGTGGCCACAGTGATG  
TGGGACTACTTCAGCCAGCTGAGCAA

>1630

ATACAAGCAGACAAAGTCTTGCCGTGTAATGCCAAATGTAACGTGGCCTCCTTGTC  
CCTTCCCCACAGTGCCCTCTCCAGGACAACTTGAGAAAGTGAACACTTACGCAGGT  
GACCTGCAGAAGAAGCTGGTGCCC

>1631

GAGCAAGACTCCATCTCCAAAAAAAAAAAAAAAAAAAAACAAATTTGAACCCCTGCC  
ATCTTCTGGCAGGCCAGCCCCAGCCAGGGGACCCAGACGTCTCCAGTGCCTTGG  
ATAAGCTGAAGGAGTTTGAAACAC

>1632

CCGTCTCAAACACTACAACAACAACAACAACAACCAAATTTGCACCCCTGCCTCA  
TCTTCTGGCAGGCCAGCCCCAGCCTAGGGGGCTCCAGAAGTCTCAACCCCTTTGA  
TGGCCTGGAGGAGTTAGGAAAGAC

>1633

CCCCTAGGTAGCTAGATGCCTGGACGGGGTCAGAAGGACCCTGACCCGACCTTGA  
TGTTCCACACAGGATGCCAGGCCAAGGTGGAGCAAGCGGTGGAGACAGAGCCGGAG  
CCCGAGCTGCGCCAGCAGACCGAGTG

>1634

GCCCGCCCCATCCAGCCCTTCTCCCCGCCTCCCCACTGTGCGACACCCTCCCGCCCT  
CTCGGCCGAGGGCGCTGATGGACGAGACCATGAAGGAGTTGAAGGCCTACAAATCG  
GAACTGGAGGAACAACACTGACCCCG

>1635

GAACCCTCGTCTTTGCCCCGGGCCCTGCTCCTTCGGCCCCGCGTCACCAGGCCTGT  
CCTTGGGTCCAGGACATCTCGCCCGTCTGAAGGACCCCGCCTCCTTCGCGCCGCC  
ATCGGCCTCCTGGCGCGACACCTG

>1636

TTGCCACCGCCGAACCCTGCCCCTGGGGATTCCCATGCTGCCGAGTCACTCCTGTAC  
TTACCCTGACAGGCTAGACTCCCGAGGCTTCCTCTTTGGCCCCTCCTGGCCCAGGA  
GCTTGGACTGGGCTGCGTGCTCAT

>1637

AGCTGCCAAGCTGTGCAACAAAGCTGTTTTCTGCGGGAGGCTGAGGACCACACACCA  
CTTCCACTCCAGGCTGAGCTGGAGATTAGAAAGACGCCCTGGAGCCAGGACAGAG  
GGTGGTCGTCGTGGATGATCTGCTGG

>1638

CAGGGGCTGGCCTGGAGCACCTGCTCTCTGCAGCCCAGGCCAACTGGGGACCTCACC  
CTCCCATCCCAGGAACCATGAACGCTGCCTGTGAGCTGCTGGGCCCTGCAGGCTG  
AGGTCCTGGAGTGCCTGAGCCTGGT

>1639

CCTGGCTGAGTGGTGGGAATGGAGGCCCCAGCCCCTCTTCCCTGACTCTCCGGCTC  
TCCCTCCTCAGGCTGGCCGTGAGTACTCACCTGCCGCCACCACGGCAGAGAATGGGG  
GCGGCAAGAAGAAACAGAAGGAGA

>1640

AGGGATGGGCATGGTACTGGCTGGGTTGGCTCCGGATGCGTGCCCTACGCCTCTCC  
TTGCTCCTCAGGGCCTACCAACCAGCGGGCTCAGGACGTTCTGGCTCGAGATGGGC  
CCAACGCCCTCACACCACCTCCA

>1641

TCCAAGTGGCAGCTGCCCTTTAGGGTTGGGGGAAGGTCAGGTCCTGAAACTCTT  
TCTCCTTACCAGCTATATCTGGGTGTGGTGTGGCAGCTGTGGTCATTGTCACTGGCTG  
CTTCTCCTACTACCAGGAGGCCA

>1642

GGGAGACCAGCAGGAGAAGAAGGCAGGGGAGAGACAAGCATTTCATGAGCTGCCT  
GTGGCTCCCCACAGCAAGCCCTTGTGATCCGGGAGGGAGAGAAGATGCAGATCAACG  
CAGAGGAAGTGGTGGTGGGAGACCTGG

>1643

GTTCAGGAGACAGCTGTGTGCATACAAGTGGCTCTGCCAGTCTGATGACTATGCACTC  
CTTCTCCTCAGGTGGATAACTCATCCTTAACAGGAGAGTCGGAGCCCCAGACCCGCT  
CCCCGAGTTCACCCATGAGAACC

>1644

AGGAAATAGGATGGGACTGCAGTCCCTGGGAGCCACAAGGCACCCAACCTGATGCC  
CACCATGTTGCAGGCACTGCCAGGGCATTGTGATTGCCACAGGAGACCGGACGGTGA  
TGGGCCGCATAGCTACTCTCGCCTC

>1645

GTCTAGGGTAAGGTTATGGCCATCTCCGGCTTCAGCCTTAACCTTTTTTATTCTCCTCTT  
TCTCTACCAGGTGTGCCTGACCCTGACAGCCAAGCGCATGGCACGGAAGAACTGCCTG  
GTGAAGAACCTGGAGGCGGTGG

>1646

GTGGGGTGAAGTGGTTGAGATAAAGGCTCTAAAGGGAGCCACGCTCCTGGTTCCCCCTC  
ATTTCTCCCAGGGGCCACTTTTGACAAACGATCCCCTACGTGGACGGCCCTGTCTCG

AATTGCTGGTCTCTGCAACCGCGC

>1647

TGCCGCCTTCACCTGATCCTCCACTCCCTCCCTCCCATGCTGACACTGAATTCTTGTCT  
CTTCTGGCAGCGGGACACAGCTGGTGTATGCCTCTGAGTCAGCTCTGCTCAAGTCATT  
GAGCTCTCCTGTGGCTCAGTGA

>1648

CAGCTGCTGCTCTATGCCGCGCTACCAAGACAAGTATGGCCCTCTCTGTAACCTACCTGT  
TGTCTCTCCAGCTGTCTATCCACGAGCGAGAAGACAGCCCCAGAGCCACGTGCTGGT  
GATGAAGGGGGCCCCAGAGCGCA

>1649

GGTGGGGGACTGTGGGGGCGTCCAGGAAGCCACTCTGCGGATCTCACTGATCCCTTCT  
GCCCCCTTTAGGATTCTGTCAACTGAATCTGCCATCTGGAAAGTTTCTCGGGGCTTC  
AAATTCGACACGGATGAGCTGAA

>1650

TTGGGAGAGGAACAGGAGGGGGATAAACCTTAATACTACTTTCTGTTGTCTCCTCTC  
CTTCCCCTAGGTGATCATGTAACCGGGGATCACCTATCACAGCCAAGGCCATTGCC  
AAAGGCGTGGGCATCATATCAG

>1651

GAGGCAGGGGGCAGGAGGGGCTGGTACAGGTGCCAGGGGTCAGCTGTCTCTGTCCCC  
ACCCACCCTCCAGAGAAGCCAAGGCATGCGTGGTGCACGGCTCTGACCTGAAGGACA  
TGACATCGGAGCAGCTCGATGAGATC

>1652

ATGGAGTGAGAGGCGAGGAGCCAGGCTTGGGAAGGGGTTTCGTCTCAAGTGTGGCC  
GTCTTCCCTCCAGGGAGCCATTGTGGCCGTGACGGGTGACGGGGTGAACGACTCCCCT  
GCATTGAAGAAGGCTGACATTGGCA

>1653

CATGCTTCAGGGGCTGGGGGTGGGGAAGAGTCCCTCTGACCTCCCTGATGCCCTCAGA  
ATCTCCCCACAGGCCCGCTGATCTTTGACAACCTGAAGAAATCCATCGCCTACACCCTG  
ACCAGCAACATCCCCGAGATCAC

>1654

GATCAATTGCTTCTGTCTCTCCTACGTCCCTTCAAATGCCCTCCCTGCCCATTTCTTA  
CCCCACAGGTCCCTGCCATCTCCTTGGCCTATGAGGCAGCTGAGAGTGATATCATGA  
AGCGGCAGCCACGAACTCCC

>1655

GCCCTGAGGGGCTGTGCCCTTCTGCTTCTGCTCTGACCCTGCCCTGCCTTTGGCCC  
TCTACCCACAGGGATGATCCAGGCACTGGGTGGCTTCTCACCTACTTTGTGATCCTGG  
CAGAGAACGGTTTCTGCCATC

>1656

AACCATGCTACCTTCTGGTCTACCTTTCTCCGACACTCTCATCTGTCTCTGCCACC  
CTCCCTCCAGACCTATGAGCAGCGGAAGGTGGTGGAGTTCACGTGCCACACGGCATT  
TTTGCCAGCATCGTGGTGGTGC

>1657

CCAGGGGTATCCAGGATCTCTGCCTCCATGATCCCCCTTACCTGCCACCTCCTTTCTT  
TGCCCTTTCAGGAACAAGATCCTGATTTTTGGGCTCCTGGAGGAGACGGCGTTGGCTGC  
CTTTCTCTTACTGCCAGGC

>1658



AATGCTCCTTTATGTGACAGCCACCAAGCCAACCTCTGATGCTGCTGACACTCTCCTCC  
ATTGCTTTCAGAGTCACCTGGTGGTTCTGCGCCTTCCCCTACAGCCTCCTCATCTTCATC  
TATGATGAGGTCCGAAAGCTC

>1659

CCCTAGGAAATTGATCTCTTGCCTCCTTTAAGCTCATGCTGCAATCTCCACTCCAATC  
TCTCTAACAGGCTGGGTGGAGAAGGAGACATACTACTGACCCCATTGGAAGAAGAAC  
CAGGCATGGAAAGATGGGGAGCT

>1660

ATTTTAGAGGCTCTGTTTACCCACTTCAACAGACTCTCCATTTCTGATGTACTTTTTTCT  
ACCTCTACAGGCTGGTGGGATAAGAACATGTATTATTAAGACCACCTCCCTCCTATGTC  
TCTCAGCAGCACGTTGGGGC

>1661

CCCCGTTCCCTCGTCCACAGCCCCGCCCTGTTCCCCGTCACAGCCTCGCCTCTCCCC  
CCGCCCCACAGCTGTCCATACATACGCTGGAGGACCCGCGGGACCCGCGACACTTGCT  
GGTGATGAAGGGCGCCCCGAGC

>1662

GTCCCTCTTCTCCTGTGTCCCTGTCTCTGTGTCCATCTCTGTCTCCCTGTGTCCCCTTGT  
CTCTCTCCAGGTGCCATTGAGTCCCTTGGCTGGCTTCACTGACTACTTACGGCAATGGC  
CCAGGAGGGCTGGTCCCCT

>1663

TTTGTTTAAGCTTGTAAAGTTTTATAAAGGCTTTGTTAAAAATCAAATTTTTAAGAATACT  
TTTGCCTAGGTCTCCAGAAATGCTTTGGGTTTCTTTTATTGCTGCAAGGAACCTCC  
ATGCCTCTAACACTCATCTTC

>1664

GGATTACAGCTGTGAGCCACTGTGCCTGGCCAGATTATTTTTTAATTGAATTGAATTG  
TCTTCCATAGGGACTGCTGAGATGCCTCTATTCTTGAAGAGCGTATTCTTGAGCTGAT  
ACCTCTGTTGATCTTGAAGA

>1665

ATGTAGTATTGGTGTATGGGGAGGAGTGCCCATTCAGCTTCATTGATGTTCAATTGTGTC  
TTTTGTGCAGGGTATGTCCTTGAACCTGGAACCTGACAATGTTGGTGTGTCGTGTTG  
GAAATGATAAACTAATTAAGG

>1666

ATATAGTTGCAGCTTCTAACAAACATCAAACTGATTATGCTTAGGGTTTTCTTTTTATT  
TTTTAACAGGGTCCAATTGGTTCCAAGACGCGTAGGCGAGTTGGTCTGAAAGCCCCCG  
GTATCATTCCGAAATTCAG

>1667

TCTCTTTCTTTCCACAGGGAAGTCCTTTAAGTTTAGGAAGATTTATATTTACTTTCT  
CTTTTTAAAGGAAAACCTCAATTGCTATTGACACAATCATTAAACCAGAAACGTTTCAAT  
GATGGATCTGATGAAAAGAAG

>1668

AGGTAATTTTTATAGTAGCCTCCAATTTAAAACCAATATTGATAAAATTGATAAATATA  
TTTTCTCAGATGCCATGAAGTACACCATTGTGGTGTGCGCTACGGCCTCGGATGCTGCC  
CCACTTCAGTACCTGGCTCC

>1669

CTGAAGTAAAAGTTCACATATGCAACTTCTATTTAATAGGTTAACTTCACAAACCTATTC  
TGACCATAGGCTGTTGCTTACCGTCAGATGTCTCTGTTGCTCCGCCGACCCCTGGTC

GTGAGGCCTATCCTGGTGATG

>1670

TGACTTAAATTTGAAGATAGTTGATTTCTTACTTTAAGCTTGCTAGCGTGCGTATTTCTT  
ACATTATAGATCTTCTTGAAACAGAATTGTTCTACAAAGGTATCCGCCCTGCAATTAAC  
GTTGGTCTGTCTGTATCTC

>1671

TAATATATTAACATATTTGTATAGTGCTCTGTGTCACTGAGTTACAGTACAGTAATTTCT  
GTATTGCAGGTAGCAGGTACCATGAAGCTGGAATTGGCTCAGTATCGTGAGGTTGCTGC  
TTTTGCCAGTTCGGTTCTG

>1672

TCCTGACCTTGGAACATGGCATTCAATTTCTTTGAGCAACTCACTTGGCATTCTTCTTGT  
ATCTTTTCAGCTCCATGCTATTGAAGAACAAGTGGCTGTTATCTATGCGGGTGTAAAG  
GGGATATCTTGATAAACTGGA

>1673

TCTGTAGTTAGGCTAGTCATTAACACTTTTTCCAGGTCAGAACTTACGACCTGCTTTTAT  
TTCCAAATAGGGCTGATGGAAGATCTCAGAACAATCAGATGCAAAGCTGAAAGAGAT  
TGTAACAAATTTCTTGGCTGGA

>1674

TAAAGTCTGGCTTCGATGACCTTTAACTGGCCTGACCCAGCTCCTTCCAATATCTTT  
TGTCTGTTAGTCAGGGACTATGCGGCGCAAACATCTCCTTCGCCAAAAGCAGGCGCCG  
CCACCGGGCGCATCGTGGCGGT

>1675

GTCTTGGTCGATTTAGGTCTTGATACCAATTTATCCTTATGTATAACCCTGCGATGCCTGT  
ATCTAACAGGTGAGAGCACAGTAAGGACTATTGCTATGGATGGTACAGAAGGCTTGGT  
TAGAGGCCAGAAAGTACTGGA

>1676

AGGGATATATAAGATTATCATTGCTTTCAACAAGGTGAATAGATACTATCCTCTCTTCTA  
CCTTTACAGATTTGCTCCATTGCTGAGGCTCCAGAGTTCATGGAATGAGTGTTG  
AGCAGGAAATTCTGGTACT

>1677

ACTTTTTTTGAAGTTTGCTATTTAGGAAAGCAGAACTCTTAAATATTCTTTCTTTTCAA  
CCTCTTATAGGGCTTTTGGTGGTCTGGAGTTGGCAAGACTGTACTGATCATGGAGTT  
AATCAACAATGTCGCCAAAGC

>1678

TTTGGGAACCTTCAGTATGTGGCTTCTTACTCCTTTGTCAGGTTTTACGATTATGTATG  
ATTACTGCAGGTAGCGCTGGTATATGGTCAAATGAATGAACCACCTGGTGTCTGTGCC  
GGGTAGCTCTGACTGGGCTGA

>1679

ACCTGGTTCATCTGGCCTTTCTTCGGATGAGGCTAAGGATGTAGACACCTAAGACCTTT  
TTTTCTTTTAGGTGTCTGCATTATTGGGCCGAATCCCTTCTGCTGTGGGCTATCAGCCTA  
CCCTGGCCACTGACATGGGTA

>1680

AGCGAGACCCTCTCAAAAAAAAAAAAAAAAAAATTTACTTTGGTTCCTGTTCTTCATGGG  
ATCTCACTTTAGGCTATCTATGTGCCTGCTGATGACTGACCCTGCCCTGCTACT  
ACGTTTGCCATTTGGATGCTA

>1681

TTTCCCTTTGTTAGCTTGTCCCAAATTAAGGAATGAGAATACTTAACTCAGTCTTCTTT  
TTTCTCATAGGACTACAAATCCCTCCAGGATATCATTGCCATCCTGGGTATGGATGAACT  
TTCTGAGGAAGACAAGTTGA

>1682

TGTTACATGATGCAGAAAGTTGATATCCCTCCGCTTCTTACTCTTTTTTTTTTCTCCCC  
ATCATAACAGGTGAATATGACCATCTCCAGAACAGGCCTTCTATATGGTGGGACCCATT  
GAAGAAGCTGTGGCAAAGC

>1683

AAGCCGGCTTGCTCTGTGCCAGGCCCCAGCCTGGTGTCCCTCCCTGCCCCTTCCTCC  
GCTACTCTCAGGAACCCCGGGTTAGCACCGTGGTGTGGGTGCCTATGACCTGAGGC  
GGCGGGAGAGGCAGTCCCGCCAG

>1684

TGCTCCAGGGGTCCCATGAGGCTCCAGTCCCGAGGGCCACCCTCCCTGACTCCAT  
TTCTTCCCGAGCTGGACCGTGAGGCCAACCTCACCAGCAGCGTGACGATACTGCCAC  
TGCCTCTGCAGAACGCCACGGTGG

>1685

GCCTCTGCAGTTCTGGGGTGGCGTGGGAGCCAGGCCCTGGGACGCCCTGACACAGCT  
GCTGCCTGCCAGGGGGACGGGGGCACCCCTCGTCTGCGAGGGCCTGGCCACGG  
CGTGGCCTCCTTTCCCTGGGGCCCT

>1686

CTGGATTATTCTGAGTCCAAGCTAGGCCCTTTTGCTAATCATGTTACATCCTTATCTTC  
CTCCACAGCTCCTGGGCAACGTGCTGGTCTGTGTGCTGGCCATCACTTTGGCAAAG  
AATTCACCCACCAAGTGCAGG

>1687

GTCACCTGATTACAAATTTATGTTTTAGATTTGTTTTCCATTTTCAGCTTGACATTTAC  
TCATTTACAGAGAAACCCTGTGGTTTTCTCATGTGGAAAATGGAAGAATTGCCCAATAT  
TACTATACTTTTAAAAGCTT

>1688

CTTAATTTTACAATTTAGTAAAAGACAAGCTTAGTTTCATCATTAAAGTTAAATAATTTTTT  
TTCCCATAGAAAAATGCACTAAGCCTGACCTGAGTAATGGTTACATCTCTGATGTAAAG  
TTATTGTATAAAATTCAAGA

>1689

CATATTTTGAGATTTTTATAATCTAGGTTATTA AAAAGTTTATAAAATAAATAATTTTTAT  
AATTTTAGAAACGTGTTGGCTCCTGAATTATATAATGGA AATTATCCACAACACAGAA  
AACATTCAAAGTGAAGGA

>1690

AATAGTGCATTTTGTGTAGCAGAAAAATAAACATTTGTTTGAATTTTATTATTCTTT  
TATTTGCAGAATTAAGTGCTCTTCTTTAAGATTAATTGAAAATGGTTATTTTCATCCTGT  
AAAGCAAACCTATGAAGA

>1691

TATTTTAATTTAATCTTTATTATTTTTGTAAATTATATGACTAAAGGTGCTGATTAATTTTTT  
CCATAAGGAAGAAGAAACAGATGCCTCCTCCACCTCTGCCATAAACTCCAAAATTC  
AAACACATTCAACAACCTTA

>1692

GAAGCTTTGCTAAAATGAAATCTGCATGTGTAGCTAAATGGTCAGTTCTCTTTCAACTG  
TACCTTTTCAGAAGGACAGGAGAAGGTAGCCTGTGAGGAACCCACCTTCATTGAAAAT

GGTGCAGCAAATTTACTACTCTAA

>1693

ACTATAGTATGAGTTACTATAGTATATTGTTATGAGCTCATATTAATTTTAAAAACAACCTC  
TTTTCTTAGAAAATAATGAGAATTGTAAGCATCCTCCTGTTGTAATGAATGGGGCTGTTG  
CAGACGGGATATTGGCAAG

>1694

TGTTTTAAAAAATATCACTTTTATATTTGTCAGACAAGTAAAGAATTTAAAAGAGCATT  
TGTTTTACAGAACCATGTACTGTTAATGTGGATTACATGAACAGAAATAACATAGAAAT  
GAAGTGGAAATATGAAGGGAA

>1695

TGTAGCACTTATAAAGTACTGGATGTTTCATTATAGCAATTCATTGTATACTTTAAACTTA  
TTTTTGAGAATCTAAAGGAATGTGCACATCTCCTCCTTATTAAACATGGAGTCATTA  
TTAGTTCAACAGTAGACAC

>1696

TGTTCTTACCAAGATGTAACAAGATAGTTTTCTTTCTTTCTTTCTTTTTTTTTAAATTGT  
TGTTCCCAGAGCCATGCACATTATCTTTTACTGAAATGGAAAAGAATAATTTACTTCTGA  
AATGGGATTTTGACAACAG

>1697

GGCTGAGATTGTAATTAACACCTGACTGCAATTGATGCTTATTTCAAAAATCTCTCTTTT  
TCCCCTCAAGCACTCTGTCTTATCAAGAACCCTTAAGAACATAGAAATGAATGGCAGA  
AAGAGGAGTCATATTTCAATAC

>1698

GCAAAAAAATGGGGTGGAGGAAAATGAGGCATCTGTGTGAGTATATAACCATTTGAC  
ATCTCTTTTAGCCCTCTCCAGGGTCACCCTAGAATCAGATCTGCTCCCCAGCATCTTCT  
GTTTCCTGGTGAGTGATTCTG

>1699

TCACCTTTATCAGAAAATTCTCAGCCAGATACAGAAATCATTCCAATGACCTGACCTG  
TGTTACACAGAACTCCAGAACAAGACCAAGCTGACAGTGCTGGAAGGAGACATTCT  
GGATGAGCCATTCTGAAGAGAGC

>1700

AGATCTGTGTTGTTGGTGGCACCTCTAGGGATATATCCTGACAGTGACAATATGCTCT  
TCATGGACAGGTACCCAGCTCCTGTTAGAGGCCTGTGTCCAAGCTAGTGTGCCAGTCT  
TCATCTACACCAGTAGCATAGA

>1701

AAGGGGAGAGCCCAGGGAGGGAAGGGAAGAATGGGCAGATGGGAGGGCAGCCAGCT  
TCTGCTCACTCCAGGCACAGCCATGGGAGATTTCGGAGATGGCAGTCTTTGGGGCTGCC  
GCCCCCTACCTGCGCAAGTCAGAGAA

>1702

ACTCCTAACCTCTTGAGGAAGGAGGGAAAAGCCAGGCTGACAGGAGGGCTTGGGTG  
GGGGCTCTTGACAGACAGTGACCGTGAAGGAGGACCAGGTGATGCAGCAGAACCCACC  
CAAGTTCGACAAAATCGAGGACATGG

>1703

CTCTAACTCCAAAATCACCAGCCCTCCCCCTCGCAACTGGCAAGTCACTGCTCCTTT  
TCTATCCCAGACCTACTCGGGCCTTCTGTGTACCCGTC AACCTTACAAGTGGCTG  
CCGGTGTACTCTCTGAGGTGG

>1704

CTCTCCTGATTTGAGGCTTGCTGGTCTCCAGTAGTATTGTTCACTGCCCAATAAGCCCCT  
GTCTTACAGCGGAGAATCCGGAGCAGGGAAGACAGTCAACACCAAGAGGGTCATCC  
AGTACTTTGCTGTTATTGCAGCC

>1705

CCCTCAAGGTCTGTACCGCAGAAGGGAGGGAGAAGAGCTCTCACCTGCCTCCTTCT  
TGGCCTCTGCAGGGCACCTGGAGACCAGATCATCCAGGCCAACCTGCTCTGGAG  
GCCTTTGGCAATGCCAAGACCGTCC

>1706

TATCATTAAATTTTCTGTGCCCAAACCTAACTTTTCTTTCTCTCCTTCTCTCCCCACC  
TGTTACAGATCTTCTGGAAAAATCCAGAGTTATTTTCCAGCTGAAAGCAGAGAGAGA  
TTATCACATTTTCTACCAAAT

>1707

GTGCTGTGGCGAGCAGCCTCCATGAGAGCCGGGGGCTTGTTGCCACCCTAACCATGT  
TTTTTCCCCTAGACATGCTGCTGATCACCAACAACCCCTACGATTATGCATTATCTCCC  
AAGGAGAGACCACCGTGGCCTC

>1708

CTTACAAGGGATCTCACTTACCCATCATACTTCTTTTTCTGGGGTCCGCCAATATGGGGC  
CTCCCTACAGAACGCTTTTGATGTGCTGGGCTTCACTTCAAGAGAGAAAACTCCATG  
TATAAGCTGACAGGCGCCATCA

>1709

AGGCATGAACCACCACCTGGCCAGCAGTCATCTCTTTACCAACTTTGCTACTTGCCT  
TTTTCTTCCAGAGGCTGACAAGTCTGCCTACCTCATGGGGCTGAACTCAGCCGACCTG  
CTCAAGGGGCTGTGCCACCCTCG

>1710

GGGATGAGAGTTTTCAAGTTCCTCTTCCCAACAACCCCTGCTCAATATGGGTCTCTCCT  
CCACCTTGCAGGTGATATATGCCACTGGGGCACTGGCCAAGGCAGTGATGAGAGGAT  
GTTCAACTGGATGGTGACGCGCA

>1711

GGACGGGCACAGCCCCAATGGCCACTCACACCCACTTTCTGACTGCTCCCACCCCTCA  
TGCCCCCTGCAGTTCAACAGCTTTGAGCAGCTCTGCATCAACTTACCAACGAGAAGC  
TGCAGCAGTTCTTCAACCACCACA

>1712

TGACCATAGAGCAGAATCCATGTCCACCTGTGTGAAGGACACTCAGTGATGCTCTCTC  
CTGCTTCTCAGCCCATGGGCATCATGTCCATCCTGGAAGAGGAGTGATGTTCCCCAA  
GGCCACCGACATGACCTTCAAGG

>1713

TCTCCTCTTCTTCTGTCATCTCTTTCTGGCATTCTTTACTTTTCTCTATTGATTTTT  
GGCCACAGGAAAATCTGAACAAGCTGATGACCAACTTGCGCTCCACCCATCCCCACTT  
TGACGTTGTATCATCCCTA

>1714

AGCCAGGATCAGAACCAGAACTTCAAGTCCAGTGTTCTCACAGACTCCTCCTACTTCC  
TTCTTGCCACAGGCGTGATGGACAACCCCTGGTCATGCACCAGCTGCGCTGCAATGG  
TGTGCTGGAGGGCATCCGCATCTG

>1715

GACCCTAGAATTCTATGGGCAGAGCAGATCACTGCAGAGCATGGGTGACTCTGGACAC  
TTCCCTCCTCAGGTATCGCATCCTGAACCCAGCGGCCATCCCTGAGGGACAGTTCATTG

ATAGCAGGAAGGGGGCAGAGAAG

>1716

AAGGTAATCCCCACCATCTCTTTCCCTCGTACCCCTCCCTAGTCATGGCCAACACACAC  
CTTGCTGCAGGTGTTCTTCAAGGCCGGGCTGCTGGGGCTGCTGGAGGAAATGAGGG  
ACGAGAGGCTGAGCCGCATCATCA

>1717

TCCAAGGTTTCAGGACCTCAGGTAGGAAGGAGGCAGAGGCTCAGCACTCCTTTCAAT  
GGGCCCCTGCAGAGACTCCCTGCTGGTAATCCAGTGAACATTTCGGGCCTTCATGGGG  
GTCAAGAATTGGCCCTGGATGAAG

>1718

TCCTTCCCTCTACCTGCAAGAATGAGGACCTTACCCCTGAACAGCCTCCCCTCTGTTC  
CTCACCTTCAGGAACAAGACAACCTGGCAGATGCTGAGGAGCGCTGTGATCAGCTGAT  
CAAAAACAAGATTCAGCTGGAGG

>1719

GGAGCTCCCCACAGATGGCACCAAGCTGGTGACCTTTGACCCTAAAGGAGATGGGATT  
CTTGGTCGGCAGGTGAAAAACCTGACAGAGGAGATGGCTGGGCTGGATGAGATCATT  
GCCAAGCTGACCAAGGAGAAGAAAG

>1720

GTAAGTGAACAACAAAATCACCAAGTCAGGATGCTTTGCCTCACTGGGCCTGGCTCCT  
TCTCTTACCAGCTGGAAGGATCCCTGGAGCAAGAGAAGAAGGTGCGCATGGACCTG  
GAGCGAGCGAAGCGGAAGCTGGAGG

>1721

TTCAACCACTGGTGGACCCTCCTGAGGCCCCACGAGTCTCCCTTACCTCACCATCCCTC  
CTTCCCCACAGAAAAGACTTTGAGCTGAATGCTCTCAACGCAAGGATTGAGGATGAAC  
AGGCCCTCGGCAGCCAGCTGCAG

>1722

CCTTTTAGAGCCGGGGGGATTCCAGTGGAGGGGTCCAGGCGGTGGGTCTGAGCCCTTT  
GTGTCTGACCAGGCACGCATCGAGGAGCTGGAGGAGGAGCTGGAGTCCGAGCGCACC  
GCCAGGGCTAAGGTGGAGAAGCTGC

>1723

TTGCACCTTTACACCCTTCATTCCCCCGCCCCAACATCCATCATATAACTCTCCTT  
CCCTTCTCAGGCTAACCTGGAGAAGATGTGCCGGACCTTGAAGACCAGATGAATGAG  
CACCGAGCAAGGCGGAGGAGA

>1724

ATGGGGCCTGAGGGCTAGAGGAGGAGGTGGGGATAGAGAGGAGTGCTGATCTAGAAT  
GGTGCTTCCCCAGGTGAGCTGTCCCAGGAGCTGGATGAGAAGGAGGCACTGATCTCCC  
AGCTGACCCGAGGCAAGCTCACCTA

>1725

GAGAAGGGCAAGGGTGGGGTTGCTTTATGGAGAAAGCTGAACCCACCTCCTGGTGCC  
CACCCCTCCCAGGCGAAGAACGCCTTGCCACGCACTGCAGTCGGCCCGGCATGA  
CTGCGACCTGCTGCGGGAGCAGTACG

>1726

CATGTTGTTTACCTCTTGTCCCATCCACACCCTCCATCCTCCCCACCCTCTGCCACCTC  
CCCTGGGCAGGAAGAAGCTGGCCCAGCGGCTGCAGGAAGCTGAGGAGGCCGTGGAG  
GCTGTTAATGCCAAGTGCTCCTCG

>1727

GGTCCTGAGACAGACCTGGACATGGGGCTGAGGCTGGGGGGCTGAAGAGTGAGCCT  
TGCCCCGGGCAGATCCTGGCCGAGTGGAAGCAGAAGTATGAGGAGTCGCAGTCGGA  
GCTGGAGTCCTCGCAGAAGGAGGCTC

>1728

AAGAGGCGTGTCCCTCCAACCTCACTGGACCTCAGCAGCCCTCAACCGAGTTACCGTG  
TTCCCCACACAGAGGAGATCTCCGACTTGACTGAGCAGTTGGGTCCAGCGAAAGA  
CTATCCATGAGCTGGAGAAGGTCCG

>1729

GTGAGCAGGCCCCACCCCTGCCCTGTGCCCTGACTGTCTGCCTGCATCCCCCTCCCCA  
ACCCCTTCCCAGGCCTCCCTGGAGCACGAGGAGGGCAAGATCCTCCGGGCCAGCTG  
GAGTTCAACCAGATCAAGGCAGAGA

>1730

TCTGACAGGTGCCTTTAGTGAAGGGAACCGAGGCTGGCTCCCTGCTCATGCCACTCT  
CCTGATCCTCAGGACACCCAGATTCAGCTGGACGATGCAGTCCGTGCCAACGACGACC  
TGAAGGAGAACATCGCCATCGTGG

>1731

AGCAAGGCTTGAGAGCTATGCATAGATGCTCAATGCTTTTCTGCTCTGCCAACCCCTC  
CCCCAACCCAGAACACCAGCCTCATCAACCAGAAGAAGAAGATGGATGCTGACCTGT  
CCCAGCTCCAGACTGAAGTGGAGG

>1732

TCTCCGTGGGCTGGGCAGCAAGTGTGTGAGGACTTGACCAGACCATGTGCCACCTCTC  
TCCTGCACACAGGCCGCCATGATGGCAGAGGAGCTGAAGAAGGAGCAGGACACCAGC  
GCCCACCTGGAGCGCATGAAGAAGA

>1733

GCAGGGCGGAGGGGATGCTACCTTCTATGACTGTGCCATCTTACCCCCCTGCCTACCCT  
CTGGCCCCCAGACGGAGGAGGACAGGAAAAACCTGCTGCGGCTGCAGGACCTGGTAG  
ACAAGCTGCAGCTAAAGGTCAAGG

>1734

GAGCTCGTCCCCCAAGCCAGGAGTCTGAGAACCCAGGCCCCCTCTCACCTCATGCTCC  
CACCTCCCGCAGGAGGAGCAAGCCAACCAACCTGTCCAAGTTCCGCAAGGTGCAG  
CACGAGCTGGATGAGGCAGAGGAGC

>1735

GTTCCCATGCCCTGTCCCTGCCAATACCATCTCTCAAGGACTGATTGGACTTTGTTTC  
CTTTAAAAGGGCTTGAATGAGGAGTAGCTTTGCCACATCTTGATCTGCTCAGCCCTGG  
AGGTGCCAGCAAAGCCCCATG

>1736

CTTGGGTGCCATGAAGGGCTGGTGAGCCAGGGGTGGGTCCCTGAGGCTTGACGCCC  
CCATTCAATGCAGGAGCAGCGCAACCATTTGCAGGGCAAACCTGTCGGAGCTGCAGGTG  
GAGCAGACATCCCTGGAGCCCCTCC

>1737

GTTAATAAAACATTTGTTTTTAAAGAGACTGGTCAGCATTGCTAATTTAAATTTTTCTT  
TTCTTAATAGGTGAATATGTTTACAAACCAAGGAACAGTGATCCACTTAACAACCCTA  
AAGTTCAGGCATCTCTGGCAG

>1738

GCCCCTTTGGGAACCTGGACACAGTGCCCTCACTTGCCCTCTCCCATCTGATCCT  
CACACCCACAGATGTCTCAAGCTCACAGACACCATCTGCGGGGTGGGGAACATGTCA

GCAAACGCCTCTGACCAGGAGAG

>1739

GATTCCAGAGGTAAAAGCGGCCATGGGCCAGACATACTGCAATCTCTGAAAATCACCT  
GTTCCCCTGCAGCCCAAGAGCCAAGAGACCTGCCGGGGGGCCCTCATCTCCGACCAAT  
GGGTCCTGACAGCAGCTCATTGCT

>1740

CTACCACCTCACCCAGCCTCTGGCCCCTGCAGGAGCCCTGGTCTAGCCTAATCTAGTGT  
ATCATTTCAGGAGACCCCAAATCCCAGTGGGGCAAAGAATTCCTTATTGAGAAGGCG  
GTGATCTCCCAGGGTTTGATGT

>1741

AGAGTGCTCTGGAGATCCCTGGAAGAGACTACTGGGGACAGGCTGGTGTGACCCTTG  
CTTTCTCCCAGGCCATCTGCCTTCCCTGCACGATGGAGGCCAATCTGGCTCTGCGG  
AGACCTCAAGGCAGCACCTGTAGG

>1742

AGTCCCCAAGCCAGGAACCTGGATTCTGGGTAAAAGGACCAGCACCAACATCCCCTTC  
TCTTACTATAGAGAATGAACTGCTGAACAAACAGAGTGTTCCTGCTCATTTTGTGCGC  
TTGAATGGGAGCAAACCTGAACAT

>1743

GGCGTGAGCCACTGCACCCCACCCGGGTCTGCTTATTCTACCCTTCTCTGTTCCAC  
CCCTGCTGCAGTGGACAAGCTGTGCCGAGGTTGTCTCCAAGAAAAAACCATGTTCCC  
CAACTTGACAGATGTCAGGGAGG

>1744

GATCTAGGGAGGTTGGGGCTTACAGTTGGGGCTGTGGCAGCCTCCAGCCAGTTCTCT  
CCTTTTCTCCAGGTGGGTCTGGTGAGCTGGGGTCTTTACAACCCCTGCCTGGCTCTGC  
TGACAAAAACTCCCGCAAAGGG

>1745

GGAGGGGAAGGGGAAGAATCCAGGGTTGTCATCACCACTGAGTATGGATTTACATT  
CTAACACATTAGAAGCTGCAGGATGCTGAAATGCAAGGCTGATGGAAGACTTGACC  
GGAACAAGGACCAGGAGGTGAACT

>1746

GCTGACATCTACCCCTTAGGACCTGAGTTCTCTGCTCCCTCCTGAGTGCCCTGCCT  
TCTGCCTGCAGTTCTGGTACCCCGGGCTATGGACAGGATGTACGGAAGTGCCACA  
GGGGGCTGTTCTCAGCTCCCAC

>1747

AGCGACAGAACGAGACTCCGTCTCAAAGAAAAAAAAAAAAAAAACAACTCTGGGCCAA  
CGTTATCCCTCCAGACACCTGAAAGACCCCGCGTGGCATCCAGGGCTTCTGATGG  
CCGCTTCCATCTGCCGCCCCGAATCC

>1748

GGGACCTCTGATCTGGCCTTGGTAGGAGGAACCCTCTGACCAGCCTTTTCTGCCCATC  
CCTCACTGCAGAGCTGATGGGAACCCCTGATGGCACCTGCTACCCTCCACCACAGTA  
CCGAGACAGGCATCTCCCAGAA

>1749

CCACCCAGAGCTTTGAGGATTTGAAAGCTGGGGCTAGGACCTTTCTAGCTAACTTGG  
GCTCTTTCTTAGATGTCTCACCTGTTCAATGTGGCACACACACTGCGTATGATGGTGCA  
GAAGGAGCGGAGCCTCGACATCC

>1750



GTGGTGCCTAGCTGGGGTTTCCCCAGGGTGGACACGCATACGTACACCTTCCATCTTGC  
TCTTTCCCTAGGGGAAGGTCATGGCCTCCATGTTCTATGAAGTGAGCACACGGACCAG  
CAGCTCCTTTGCAGCAGCCATGG

>1751

CCAGAAGAGGGGGACTGGCAGTTGGGGGGCCTCTGAGCTGCAAAGACAGGATTTTC  
CCTTTTTTCCAGCTGGCCGCAAGCACTGCCGGAGGCCAGTGATCAATGCTGGGGAT  
GGGGTCGGAGAGCACCCCACCCAGG

>1752

TAAAAGCTTGAAATGATGTCGGGGGGCACTCAGTCTGGGATCCCTGTGGTGACTGGA  
TTCCTCTCCTAGATCACGATGGTGGGTGACCTGAAGCACGGACGCACAGTACATTCCC  
TGGCCTGCCTGCTCACCCAGTATC

>1753

AGCCATGGAGATGTGGGTTGGGCAGTCAGAGCCCAGCGCTGCATCCACCATGGCTCTC  
CTCACCTCCAGGAGGAATTCGAGAGCATTGAGGAGGCGCTGCCTGACACTGATGTGC  
TCTACATGACTCGAATCCAGAAGG

>1754

AGCCCAGACTTGTGTCCTCTGTAGCCACTCCTACCCCAAGGCACTAATGGGGACCCCA  
TCTGCTTTGCAGTGCTTTGGTCAGTTCATCCTCACTCCCCACATCATGACCCGGGCCAA  
GAAGAAGATGGTGGTGATGCACC

>1755

ACTTAGTCCTGGACAAGCCATCCATGGGCTGCACGATAACACTTCCTTTTTTTTTTTTT  
TTTTTTGCAGCGTGGAAGTGGACTCGGATCCCCGCGCAGCCTACTTCCGCCAGGCTGA  
GAACGGCATGTACATCCGCATG

>1756

AGCCACCAATCTGGTACCCACATTGCAGGTTTCAGCAAGCATAGAGCTAAGTGCCAAAT  
GCTTCCTTCCAGGGGAGATCATCGGAGGCCGGGAGAGCAGGCCCACTCCCCGCCCTA  
CATGGCGTATCTTCAGATCCAGAG

>1757

CTGTCTGCCTACCCTGCAGAGCTGGTGGACCATAGCTCCTGCAGCCCAGACCTACCTCT  
TGCTTTTGCAGCAATATAAATGTCACCCTGGGCGCCACAATATCCAGAGACGGGAAA  
ACACCCAGCAACACATCACTGCG

>1758

CTGCACCAGCGACCCCCGAGCCTTGGCTGGAGGCCCCAGCTGAGCGGGAACGCCTAC  
ATTCTTCCCTCCAGCTGAGCAGAAGAGTCAGACGGAATCGAAACGTGAACCCAGTGGC  
TCTGCCTAGAGCCCAGGAGGGACTGA

>1759

AGAGCCCGGAGCTCAGGGAAGCAGGAGCAGGGAGGCCTGTCTCAGTCTCCCTTCTCC  
TCTCTACCTACAGGGGATTCCGGAGGCCCCCTGCTGTGTAACAATGTGGCCACGGC  
ATCGTCTCCTATGGAAAGTCGTCAG

>1760

TGGAGAAGTTGCTGGTTTGGTCCCAGTGGGAGGTCTATGCTGATTCTGGGTTCTCCA  
CCTTGTTCCAGGGACCAAAGCCAGTTCAGCTGCTTCAACCCCAAGTGCCTCCTGCC  
TGCCAGCCGGCACTACTGGACCT

>1761

GATGCATCTGGGGTCATAGAGGACCACAGCACCCCAATCTGCCCTGAGCATTCTTCT  
GCTTCTCAAGATGGGGAAGTTCCGGAGCCTGCTTTTTACCTCGGAGGACGATGAGAG

GATCCACATGGTGAACAACCTCC

>1762

TAGTATCATTGTATAGAATTTACCCCATGGGTACAATGTATTAATGTTCTCTTTCTC  
TCCTAAAAGTTGCTGATCCACACCCCTTTCATATTCAAGCTGAAGTGACGATGAAAACA  
AATTTCTTTGGTACCCGAGA

>1763

AAATTTGGCATTACCTCTCTACGGGATTGTTGCACACCTTTCTACATAATGCTTTGTGG  
TGATCTTAGGGAGAGTGGTGAACGTATCTAGCATCATGAGCGTCAGAGCCCTAAAAG  
CTGCAGCCCAGAGCTGCAGCA

>1764

GTGTGAGGAGTCGGGGGGCTTGGAGGTCCCCCACCATGCCACACCTCTCTCCCT  
CTCTCTCCACAGAGGGAGATAACGCTGTGCTGCAGTGCCTCAAGGGGACCTCAGATGG  
CCCCACTCAGCAGCTGACCTGGTC

>1765

TCTGTCTTTGAGTCTCTATCTCTCTCCCTCTCCTGGGTGTCTCTGCATTTGGTTCTGGGT  
CTTTCCAGGGGAGCTGTTCCGGTGAATGTTTCGGACCTAGGTGGCCTGGGCTGTG  
GCCTGAAGAACAGGTCTCAGA

>1766

GGGGAGGGGAAACTGAAGAGGTGAAACCCTGAGGATCAGGCTTTCCTTGTCTTATCTC  
TCCCTGTCCAGACCTACCATGGCCCTGGCTCCACACTCTGGCTGTCTGTGGGGTA  
CCCCCTGACTCTGTGTCCAGGGG

>1767

CCTTGAGATCTCAGGATTGGGACGTAAGATGCCAGCCTGGGGTCCTCGTCTCATAGCCC  
CTTCCCCCTAGTACTATGGCACTGGCTGCTGAGGACTGGTGGCTGGAAGGTCTCAGCT  
GTGACTTTGGCTTATCTGATCTT

>1768

AGAATCTTGAGTGGGTCCGCCATTCCATTCCAAGTCGGCCCTCACCGTGCACCTCCTCT  
TCTCCCGCCAGATTCTCAAAGTGACGCCTCCCCAGGAAGCGGGCCCCAGAACCAGT  
ACGGGAACGTGCTGTCTCTCCCC

>1769

GCCGCGCGGACCCTTAGCCTTGACCGCCCCATCTCTTCTGACCCCGTCTTACAATGCC  
CCTCTACCAGGACGCGCCAGCGTTGGGCCGAGGCCTGGGGGGCACTGCCCGTC  
TTATGGAAACCCGAGCAGCGACGT

>1770

GAATAGTGGACTGGGCCCTGGAGGAGAGGGGGCATGACTCGGTTCCCCATCCCCATCC  
CCAAACCCCCAGGCCAGAAGAAGAGGAAGGGGAGGGCTATGAGGAACCTGACAGT  
GAGGAGGACTCCGAGTTCTATGAGAA

>1771

GTCTTCTCCTTACCGTAGGCTGTACTTCCCATGCCCTAGCCTCCAATTCTCCATCCCC  
GCCAAGCAGGGTCCCAGTCTATGAGGATATGAGAGGAATCCTGTATGCAGCCCCC  
AGCTCCGCTCCATTCGGGGCCA

>1772

CTGGGCTGACTTTGCCTTCCAGCCTACTTCCAGTGCCACCCATGTTCTCCTCCTCCCTG  
GTCCTATCCAGATGCAGACTTATGAGAACATGGATAATCCCGATGGGCCAGACCCAG  
CCTGGGGAGGAGGGGGCCGCAT

>1773

GGGTTCTAGGGCCTGGTGGGCAGGGGAGGACTGCTGGACCCCTCCCCATCACCGTT  
TCTTCTGCATAGCCTGGATCTCCTCAAGTCCCCAAGATTACACCTGACTCTGAAATCT  
GAAGACCTCGAGCAGATGATGCC

>1774

CAGAGGGGAGGCCCGGCCAGGTCTCCGGCAACTCCCGCGTGTCTGCTTCTCCGGCT  
GCCACCTGCAGTCCCAGCTCTTGCTCCTGCCTGTTTGCCTGGAAATGGCCACGCTT  
CTCCTTCTCCTTGGGGTGCTGGTG

>1775

GCAGGGGCCAGGGCTGGGGAAATGTGTCACCATCCCCAGTCCCTGACCCACCCACCCT  
GTCTCTCCACAGGCCCTGGGTGCCAGGCCCTGTGGATGCACAAGGTCCCAGCATCATT  
GATGGTGAGCCTGGGGGAAGACGC

>1776

GGTGGGCGGGGCCAGGAGGCTAGGGAGGGCAAGAGGGGCCAGGGCTCTGAGCCATA  
CTACCTCCTTGAGAGCCGCCCCAGGCCCTTCTGGACATGGGGGAGGGCACCAAG  
AACCGAATCATCACAGCCGAGGGGAT

>1777

ATCCAGGAGGGTCTGAAAGATATTCACCTCCCCCTGCTCACTGAGGCACCCACCCAC  
CCACCCCTACAGAAACGATGGCAGAACGAGAAGCTCGGGTTGGATGCCGGGGATGAA  
TATGAAGATGAAAACCTTTATGAAG

>1778

CTGGGGGTGGCTGGGGGCAGGGACCCAGGTGTCAGGGTGCTGATGTTGCTGCCTC  
ATTTCCATCCCAGGCCTGAACCTGGACGACTGCTCCATGTATGAGGACATCTCCGGGG  
CCTCCAGGGCACCTACCAGGATGT

>1779

CCCAGGACCCATTTTTCCACCCTAATGCATAGGTCCAATATTGACCGATGCTCTCTGC  
TCTCTCCTAGCCTCACTTCTAACCTTCTGGAACCCGCCACCACTGCCAAGCTCACTAT  
TGAATCCACGCCGTTCAATGT

>1780

CTTGCCTTGCCCTCCGGATTCAGGCCGATGGGTTGAGCCCCCTGACCCTGCCCGTGT  
CTCCCTCGCAGCTGGGCGCCGTGTACACAGAAGGTGGGTTCTGGAAGGCGTCAATA  
AGAAGCTCGGCCTCCTGGGTGACT

>1781

GCCGGACTGGCCCTGCGGCGGGGCGGGTGAGGGCGGCTGCCTTCTCATGCCAACTC  
CTGCCACCTGCAGGGACCTGAAGGCCAAGAAGTCAAGAAGAGATGCCTGCAGGCC  
ACCATCACCCAGGACAGCACCTACGG

>1782

AGGGACAGGGGACCGGCTGGAGACAGGGCCAGGCGGGCGTCTGGGGTCACCAGCCG  
CTCCCCATCTCAGTCTCCCGGACCTGCCCGTTATGATCTGGATCTATGGAGGCGCCT  
TCCTCATGGGGTCCGGCCATGGGGC

>1783

GATCTCCCCTCCTGGAGGCCAGCCTGGGCCACTGGTCTCTAGCACCCCTCCCCCTGC  
CCCTGCCCCAGGTAATATGGCCTTCGGGATCAGCACATGGCCATTGCTTGGGTGAA  
GAGGAATATCGCGCCTTCGGGGG

>1784

TGTCCTTGTCCAGCGTGGGGTGGGCAGAGTGGGGAGCGGCCTTGGTGACGGGATTT  
CTGGGTCCCGTAGACCTCTCCCCCTACAACAAGGGCCTCATCCGGCGAGCCATCAGC

CAGAGCGGCGTGGCCCTGAGTCCCT

>1785

CTTGCCTTCAAATGGTTCTGAGCCCTGAGCTCCGGCCTCACCTACCTGCTGGCCTTGGT  
TCTGCCCCCAGGTGGCTGAGAAGGTGGGTTGCCCTGTGGGTGATGCCGCCAGGATGGC  
CCAGTGTCTGAAGTTACTGATC

>1786

GGCAAGGGGCGGCTCAGGGGAAACTGGGAGGTACAAGAACCTGCTAACCTGCCTGGC  
CTCTCCACCCAGACCCCATGCTGCACTATGTGGGCTTCGTCCCTGTCATTGATGGAGA  
CTTCATCCCCGCTGACCCGATCAA

>1787

GTCGGGGTGAGTATGCACACACCTTCTGTTGGCACAGGCTGAGTGTGAGTGCCTACT  
TGATTCCCCCAGGGAGGACTTCTACAAGCTGGTCAGTGAGTTCACAATCACCAAGGGG  
CTCAGAGGCGCCAAGACGACCTTT

>1788

CAAGTCCGGTCTCTGGGCTGATCGGTCCCCAGTGAGCACCCCTGCCTACTTGGGTGGTC  
TCTCCCCTCCAGGAGTGCCAAGACCTACGCCTACCTGTTTTCCATCCCTCTCGGATGC  
CCGTCTACCCCAAATGGGTGGGG

>1789

TGCAGGTGGAGAGCAGGCTTCAGCCCCCTGGGAGTCCCCAGCCCCGTCACAGCCTCT  
TCTCACTCTGCAGGGACCCCAACATGGGCGACTCGGCTGTGCCACACACTGGGAAC  
CCTACACTACGGAAAACAGCGGCTAC

>1790

GAACAGCCCCTTCTGTGCCCCACTTGTGAAAGTCTCATAAACCCCTGTGGCCAC  
TCTGCCTTCCAGAGAGAGGGGCTGAACTGCAAGGTGGCCACCAACACAGAGGCCCTG  
CAGAGCGGCAGGATGGAGATGTGGA

>1791

TCTCTAGTGCTCTGCCATGGGGAAGGGTCCCACGTCCATCTCATCGCACCCACCTATCTC  
TTGGCCACAGAAAGCATCGCTGGAGGGCAGCCTGGTGGAGACGGAGGTGTGTTACA  
GGACCCAGCTGGCCAGCTGCAGG

>1792

GGTGGAGAGTTTATTGAGTGTGGGATTGGCTTGTACCTGCCAATCTGTTCTGCC  
ACTCCATCCAGGCCTGGGGCTCTAGAAGACCAGAGGGGAGGAGGAGGAAGGATTAA  
GGGTGGAGGGAAGGGACAGCCCCT

>1793

AACTCTGGTGTGGGCTCAGCACCCCATCCGATGACCTGACTACTCTCCATCTCCGCT  
GATCCTCACAGCCACCGTGACAATGCCAACATCCTGCTACAGAATGACAATGCCCAT  
CTGGCTGCTGCTGACTTCCGCAC

>1794

AGGTGAGCAGCCAGGACCTGGACCTGCAATTCCAAGCAGCCTGGGCTGAAGTCCCTG  
ATTCCCATGGCAGGTTTGGAGACAGAGCAGGCCCTGTGCTGAGTGTGGAGGCCGACATC  
AATGGCCCGTGCAGGTGCTGGATGA

>1795

GGAAGGCTTGGGAGTGAGAGATCAGGATGGGTCCAGATGCGCACATCCACATCCCCTT  
TTTCCATAGGAGATGAACGCCCGCGAGCCAGGTGGGCGGTGAGATCAATGTGGAGAT  
GCGCTGCCCAGTGTGGACCTGAGC

>1796

ATTTGGGAGGAGGCCTGACTGAGGAGAGGGATCCAGGCTCACACCACCTGTCCTGT  
GTTCTGTCTGCAGACAGAGGAGCTGAACCGGAGTGGCTACCAACAGTGAGCTGGTC  
CAGAGCGGCAAGAGCGAGATTTCCGA

>1797

GCATGGGGATGGGCCAGAAAGAGGACACTGACAACCCTCACTGACCCCTGGTCTTCCT  
GCCCTCTGCAGAAAGCATCCTGGAGGGCAACCTCGGCGGAGACAGAGAACCGCTAC  
TGCATGCAGCTGTCCAGATCCAGG

>1798

TGAGCTCACCTCAGAAGAAACCCCAAGCCATCACTGTCGCCTCCTTTTCCTTCCTTCT  
CCTCACAGCAGGTCTATAACAGTCACCCTTGGAGCCCATAACATAACAGAGGAAGAAG  
ACACATGGCAGAAGCTTGAGGTT

>1799

TCCCTCCCTGATCACCTCCAAGTCCAGAGCCCATTTCGAGGACTGACAGTCCTTCAT  
TCCCTTACAGTTGAAGGAGAAAGCCAGCCTGACCCTGGCTGTGGGGACACTCCCCTT  
CCCATCACAATTCAACTTTGTCC

>1800

AACCCAATTTGTCCATTCACTGGAGAGAGTATCTATGGCCGTGTTCAAACCCTGGGGTG  
CTCTGTTCCAGGGGAGATCATCGGGGGCACAGAATGCAAGCCACATCCCGCCCCTAC  
ATGGCCTACCTGGAAATTGTAAC

>1801

ATGAGCTCACCTCAGAAGAAACCCCAAGCCATCACTGTCGCCTCCTTTTCCTTCCTTCT  
CCTCACAACAGGTCTATAACAGTCACCCTTGGAGCCCATAACATAACAGAGGAAGAAG  
ACACATGGCAGAAGCTTGAGGTT

>1802

TGCCCTCCCTGATCACCTCCAAGTCCAGAGCCCATTTCGAGACTGACGGTCCTTCAT  
TCCCTTACAGTTGAAGGAGAAAGCCAGCCTGACCCTGGCTGTGGGGACACTCCCCTT  
CCCATCACAATTCAACTTTGTCC

>1803

CAAGCTGGCTGGCAGACAGGAGTGGAGGACTTCCCGGGCTCACCTTCTTCTCTCTC  
CTCTCTACAGGGAGACTCTGGGGGCCCTTCTGTGTGCTGGGGTGGCCCAGGGCA  
TCGTATCCTATGGACGGTCGGATG

>1804

TTCATGAGCCCCAGATCTGGATGGGACCCAGCCCTGGCCTTGCCCTGAGTTTCCCC  
ATGTTCCCAGAGACCACGACCAGCACCAGCTCCCTGGCACCCCCACCTACCAG  
AAGATCTGTGACCCTGGGGAGCT

>1805

GTGGCAGAGGGAGCCTGAGGGAACCCCACTCCAGCCCCCTCCCTGACAGGCCCTG  
CCTGTCTCTACAGAGCCCGGCACCCCATGAGGACATGCAGAGCACCTGCAGAGGAGC  
AGGAGGCCGGAGCTGAGCCTGCAGAC

>1806

TTTTTCTCTCTGGCTCCCCACCCCTCCTTCCCTTGGCTCTCTGCTTCTCCCTCCCCACC  
CTTGGTGAGAGGAGGCTGGCAGCTGTGTGCAGGATGGGCAGAGGTATAATGATAAGG  
ATGTGTGGAAGCCGGAGCCCTG

>1807

GCAGCCAAGGGACAGATGGCTCTTGGAGAAACACTGCTTCCATTGATGCCTTTTTCT  
CTTTATGCCAAGGGTGCCCTGGACCTCGTGGCAGAGATGGAGAACCTGGGACCCCTG

GAAATCCTGGCCCCCTGGTCCTC

>1808

AGACTTACCTAGCCAAGTAGGGAAGACCTAGTGCCTTCAACCTCTAACGTTGTTGG  
GTTTCTTTGCAGAACTTTGCTGCCAGATGGCTGGAGGATTTGATGAAAAGGCTGGTG  
GCGCCCAGTTGGGAGTAATGCAAG

>1809

ATTGCCACCCACTAGAGGTCTGTGTCCCCTCTCTTCTTTCATTTACATACCTCCCTGT  
CTCTTCCCAGGGTGAAGCCGGCCCCACTGGTGGCCGTGGTCCTGAAGGTGCTCAAGGT  
CCTCGCGGTGAACCTGGTACTC

>1810

GCTACCCAGGAGAGCCCAGTCTGCCTCTCCCCTCTCCTGACACCCCTCCCTTCTTCT  
CATGCCACAGGGTGCTCCTGGCATTGCTGGTGCTCCTGGCTTCCCTGGGCCACGGGG  
TCCTCCTGGCCCTCAAGGTGCAA

>1811

ACTCTAGATCGAGGCTTGCTCCAAGGCCAGGTGAAGGCTCACTCTGTTTCTTTTTTG  
CTGGTCTCAGGGCCCTGCTGGCCCCAGGGAGCCCCTGGACCCGCTGGTGAAGAAG  
GCAAGAGAGGTGCCCGTGAGAGC

>1812

AGGGGCTGGGGTCTCCCTGCATCGCTGAGGTACATGGTATCCCACTGACTCCCTGT  
GTACCCTTGTAGGGAGCCCCTGGAGAGCGAGGGCCCAGTGGTCTTGCTGGCCCCAAG  
GGAGCCAACGGTGACCCTGGCCGTC

>1813

CTTAGTGATGTTGGGTGGATGGATGTGGTCAGAGTGTCTATGTTCTGAGAATGGTGTT  
CTGTCTTTCAGGGAGCCCCTGGTGAAGATGGTCGCTCCTGGACCTCCAGGTCTCAGGG  
GGCTCGTGGGCAGCCTGGTGCA

>1814

CTCCCTGCTTCTCCCTGGACCTTCTCCCCACTGCTGTTGGTTGATCACTTCTTGGTGTC  
TCTGCCGAGGGTGAACGAGTTTCCCAGGTGAACGTGGCTCTCCCGGTGCCAGGG  
CCTCCAGGGTCCCCGTGGCCTCC

>1815

CAGGCTCCATGAACATGGGTTGAGGGAGAGGTGCTGTCCACTACAGACTCCCTCTTAC  
CTCCCTCCCAGGGTGCATCTGGCCCAGCAGGCCCCCCTGGCGCACAGGGCCCTCCAG  
GTCTTCAGGGAATGCCTGGCGAGA

>1816

CGCTCTTCTGGAAGAGCTCCAGGGTTTTAGCCTGCCCTCATTACCTGCTTCTCCTT  
CCCCATTATAGGGTGCTGATGGCCAGCCTGGGGCCAAGGGTGAGCAAGGAGAGGCCG  
GCCAGAAAGGCGATGCTGGTGCCC

>1817

ACAGTGACTTTGGCAGCCTGGATGAGGAAGGGTGAGATGAGTCCTCACTTCCCGCATT  
TTCTCCTTCTAGGGCAACCCTGGACCCCTGGTCCCCCTGGTCTTCTGAAAAGATG  
GTCCCAAAGGTGCTCGAGGAGACA

>1818

CAGAGCTGTGCTGAGAGGACGAAGAGGCTGGGCCACTGTCAGTTCTCATCTCCTGCCT  
CTCCTCTCAGGGTGCCGAAGGTCCACCAGGTCCCAGGGTCTGGCTGGTCAGAGA  
GGCATCGTCGGTCTGCCTGGGCAAC

>1819

TGAAGGGTCAGTGGGCCCTGGGCAGGGGTGCTTACCACTTGCACTCATCATCCTTGTC  
TCTGTCTCCAGGGTGAGCCCGCAAGCAGGGTGCTCCTGGAGCATCTGGAGACAGA  
GGTCCTCCTGGCCCCGTGGGTCTC

>1820

CTAGAAGGACCTTCTGTTCTGTCTCTTCTGGAACATTCTTCTCTGAGCCTGAGACCTC  
TCTCCTGACAGGGTGATCGTGGTGAGACTGGTGCTGTGGGAGCTCCTGGAGCCCCTGG  
GCCCCCTGGCTCCCCTGGCCCCG

>1821

TTGGGTGGGACAGGAGGGGGCTCTGTCTGGCCCTGACCTGACTCAATCGGTGTCTG  
TCTTGTCCAGGGTCTCAAGGCCCCAGAGGTGACAAAGGAGAGGCTGGAGAGCCT  
GGCGAGAGAGCCTGAAGGGACACC

>1822

CCCAGCCCCAGCGACTCCCCAGCCTTCCCTGTGGTGACCACTCTTCCCTCAGACCTC  
TCTCTTGCAGGGTCTCCTGGCCCCGTCGGTCCCTCTGGCAAAGATGGTGTAATGG  
AATCCCTGGCCCCATTGGGCCTC

>1823

AGCAAATGGGGATGGACATGGAGGGGCACTTTCACACAATCCTGGCTGATCTCTCTGT  
TTCTGCTGCAGGGTCTCCTGGAATCCTGGCCCCCTGGTCTCCAGGTCCCCCTG  
GCCCTGGCATCGACATGTCCGCCT

>1824

CCTGGGTCTCTCAAGCTTTTGTGTCTGTGCCTGTCTGAGCCCCATGGGTGCTGCCTCT  
TCCCCCTGCAGGAGACTACTGGATTGACCCCAACCAAGGCTGCACCTTGGACGCCATG  
AAGGTTTTCTGCAACATGGAGAC

>1825

GCCCCACAGCCCCTGGTCCCATTGAATGCCAGCTCCCAGGCCTCACACTGCCGCTCTC  
TGCCCCAACAGTTCAGCTATGGAGATGACAATCTGGCTCCCAACTGCCAACGTCCA  
GATGACCTTCTACGCCTGCTGT

>1826

GCTTCTGGGCAGCTGGAAGTGGGTAGCAAGGCATCTACTGAACAGAGCCTCCTCCTTT  
TTTCTCCCCTAGAAACATACCGGTAAGTGGGGCAAGACTGTTATCGAGTACCGGTCAC  
AGAAGACCTCACGCCTCCCCATCA

>1827

GAGGCCACCGTGCGGGTAGGCGGGTGGTTGGCCTCCCAGAAGAGGCCCTGATCTCTC  
CTGCCCGCCCCAGTGACCTGCACGCGCCTTACGCCGCTGACATTGTGTTCTTACTGGA  
TGGCTCCTCATCCATTGGCCGAG

>1828

AGGCCTCCTCAAGGCCAGGGCCAGAAGAGATCCTGAGTCCTAGCCTGTTGCCACCCCT  
ACCCTCCAACAGGACAGAGTTCGGCCTGGATGCACTTGGCTCTGGGGGTGATGTGATC  
CGCGCCATCCGTGAGCTTAGCTAC

>1829

CATGCCTCCCAAGATGACCCCAAATGAAGTGTCCAGGGGAACCGTGATTTGACCCCTG  
CACCTGTCCCAGGTCTGCATCCTGATCACAGACGGGAAGTCCCAGGACCTGGTGACA  
CAGCTGCCCAAAGGCTGAAGGGGC

>1830

AGGTCAGCTGGGGGGTGGGGGCAGTCAGAGAGCATGTGGGTGACTGAGTCCTGATGG  
GTCGTCACTTACAGGGATCAAGAATGCTGACCCTGAGGAGCTGAAGCGAGTTGCCTCAC

AGCCCACCAGTGACTTCTTCTTCTT

>1831

CGACCCCAACCCTGCATCATACATGCCACCCCAATCCTCCTGCCTGATCCCCTGATCC  
CGCATTCCCAGCGGATGACTCGACCTCTGCTCCACGAGACCTGGTGCTGTCTGAGCCA  
AGCAGCCAATCCTTGAGAGTACA

>1832

GATGTCAGGAGTATAGGTGGTGGCTGGGGACTTGGCTGGGCAAGATAAAGTGACCTCT  
TGCCCTGGGCAGGTGAACGTCCCAGCTGGTGAGACCAGTGTGCGGCTGCGGGGTCTC  
CGGCCACTGACCGAGTACCAAGTGA

>1833

ACCTAACCCCGACCCAGTACCCCTCCCACTTCTGACTCCATGAATCCCTGGTGGGA  
CTCTCCCCAGCTGCCCTAGAAGGGCCGGAAGTACCATCCAGAATACCACAGCCCAC  
AGCCTCCTGGTGGCCTGGCGGAG

>1834

CCGCGCCTCAGACAAGGCTGTAGAGTCTGAGTCTGCAAGCCCACTGGCCCCTTGGTG  
TCCCCATGCAGGTGGGCCACACAGCAGCAGGAGCTGGGCCCTGGGCAGGGTTCAG  
TGTTGCTGCGTGACTTGGAGCCTGG

>1835

TTTCTTCAGGCTGGGACGGGCAGGCAGGGCAAGGCCCGAGGCCACTGACATCCCAT  
GTGCCCTGGGCAGACGCTTCTGTTGAGCAGACCCTGCGCCCGGTCATCCTGGGCCCCA  
CATCCATCCTCCTTCTGGAAGT

>1836

TGCGGGGAAGGGATGGACAGGCAAGGGTCAGGGCATGGCCTCTGCTGGTCTGACCC  
TGTTATCTTGCAGGCTTGGAGCCACCGCAGAAGGTGGTACTGCCCTCTGATGTGACCC  
GCTACCAGTTGGATGGGCTGCAGCC

>1837

TGGGCTGGGCCAGTGAGTGGGGGAGGTGTGCGAGCCCCAGGCTGCCTCTATGCTGTG  
CTCTCTCCAACAGGACCAGAGCTGCCTGTGAGCCCTGTAACAGACCTGCAAGCCACC  
GAGCTGCCCGGGCAGCGGGTGCAGT

>1838

CATCACTGCCATCGTCCACATCCCTGTCTCTTTCTGACCCCTGCCACCTACCCTGACT  
TCTCTCTTAGGGGTGGAGCGGACCCTGGTGTCTCCTGGGAGTCAGACAGCATTGACT  
TGGATGACGTTGAGGCTGGGCT

>1839

TGTGGAGGACAGCCTGCCTCACTCTGGTCCTGGTTCTGACTTCTGACTTCTGTCT  
GTAACCTAGAGCTGGAACTCCACTTGCTGTTCCAGGGCTGCGGGTTGTGGTGTCA  
GATGCAACGCGAGTGAGGGTGGC

>1840

GGGACCAATGAGGGTATGGGTGCCAGAGGGGACAGGCAGGAGCCATGCCAGCATTTC  
CCTCTGACCTCAGGTCCGGAGTCCAGCCAGACACTGCCCCAGACTCTACTGCCACAG  
ACATCACAGGGCTGCAGCCTGGAAC

>1841

TTGCCCTATCAGATAGCCCCACTCCTCCTGCCTGTTCCAGCAGACTCCCCATTGCT  
CTCCCCACTAGACCCACTGGGCCAGTGAGGACGGTCCATGTGACTCAGGCCAGCAG  
CTCATCTGTACCATTACCTGGAC

>1842



TGGGGGTTAGGTGGGGCTCTGGGGCACAGAGTTTGCTAGCCCTGGAGCTGCCTCCAT  
CCCTGTTCCAGGCCAGAGAAATCCCAGTTGGTTTCTGGGGAGGCCACGGTGGCTGA  
GCTGGATGGACTGGAGCCAGATAC

>1843

CCCTGCGTAACCATTCTGCACTGCCTCTCTGTTCTCTACCAGGACCCCTTACCTTGCCT  
CTGTCCCCAGCCCCTGAGCCTGTGGGTCGTGTGTGAGGCTGCAGATCCTCAATGCTT  
CCAGCGACGTTCTACGGATCAC

>1844

CTGACGCCACCCCTGTCTTCTGGCTGGGACTGCTCACCCCTAACCATTGCTGTATGC  
CCACCTGCCAGGCGGCCCATGAGGCACCAGATACTCCCAGGAAACACAGACTCTGC  
AGAGATCCGGGGTCTCGAAGGTGG

>1845

CCAGGGTGGGCTGGGATTGGTGCAGGGGCATGGGGGCAGAGCTCCCTGATTCCTGA  
GCTTCTCTCCAGCGCCTGAGGCTCCGCCAGCCCTGGGGACGCTTACGTGGTGCAGC  
GCGGGGAGCACTCGCTGAGGCTGCG

>1846

CAGGCCCTTAAATGCCCCAGGTGTCACTATCCACATGCTTTGGCCCCACCCTCAC  
GCCTGCCAGGTGGCCAGGAACAGTCCCGGTCTGGGGCCGAGCTCAGCAGCTA  
TCACCTGGACGGGCTGGAGCCAGC

>1847

ATCTCAGATCTCTCCCTTCTGGGTTCTCAGGACTCAGCCTCTGATCCTCGATCTTTCATT  
CCTCCTCAGAGTCACCTCGTGTCCAAGCATTGAACTACGTGTGGTGGACACCTCGAT  
CGACTCGGTGACTTTGCCTG

>1848

CAGGATTTGGGTGGGCTGGCAGTTGGGGCTCTGTGGAGACAGCTTTTTAATCAAGTTC  
TGTCTCTGCAGAAGTGCCTGGGTCCCCGCAGACACTCCAGGGATCTCAAGCTCCA  
GCGGGTGACAGGGCTAGAGCCTGG

>1849

ATAGTGGGAAGGGCAGAAAGGTGTGTCTGGGTGGGCTGCCCGCTCAGTAACTTGTTT  
CCCTTCTACAGTGTGCCCCGTGGCCTGGCGGATGTGGTGTCTACCACATGCCACT  
CAAGACAATGCTCACCGTGCGGA

>1850

CTCCAGGCTCTGTGCACCCCATCCCTGCTCTGTCATCCTCCTCAGGCTCTGTGTTTCC  
TTCCACCCAGGTTGGCCTGCTGTCTTACAGTCATCGGCCTTCCCCTGTTCCCCTG  
AATGGCTCCCATGACCTTGGA

>1851

AGGCATGGACTCCTGGGGCTATCCACTGGGAGCTTGGTGCCCCAGGGTTCTGACATGT  
CCTTCTTCCAGGCACAGCCGTGGTCACAGCTCACAGATACATGTTGGCACCAAGATGC  
TCCTGGGCGCCGCCAGCACGTACC

>1852

ATGGGGAAGGGGTCTGGGAATAGGGGTGGCCCTGAAAAGGCTATCATGCAGCCACTG  
GACCCACCTTAGGGCTTAAATGTGGTGTGTTGGGAATGGCTGGAGCGGACCCAGAGC  
AGCTGCGTCGCTTGGCGCCGGTAT

>1853

GAGGCCCTCCAGCAAACCAGGGGCCTTGGGGGAGGGTCCCTTCTGTCTGACCTCT  
TCACCTCCTCAGGGCTTCCCTGGAGCAGATGGGCGTCCAGGCAGCCCTGGCCGCGCCG

GGAATCCTGGGACCCCTGGAGCCC

>1854

TGTCTAGGGGCTTCTTCCAGCTCAAGGCCCCCATAGCCTGAATCCTGCCACTGCTCTC  
TGTCTTACAGGGGGCTCCCGACAAGTCATCGGAGGTGAAGGACCTGGGCTTCTGG  
GCGGAAAGGGGACCCTGGACCAT

>1855

GGGGACCAACACCAGGGGGGCGAGAGTGAGGTCTGTGGGGTTGCACCTTATACTTTG  
TCTCTCCATCAGGGCCCCCTGGACCTCGTGGACCACTGGGGGACCCAGGACCCCGT  
GGCCCCCAGGGCTTCTGGAACAG

>1856

GGGGTCCCCTCCCCTTGAGAACTGCTTGCTTCGAGCGTCCTGCATCACCTCCCTTTGC  
CTCTCCACAGGGTACTCAGGGCCTCCTGGAGAGAAGGGAGACCCTGGGCGGCCTG  
GCCCCCAGGACCTGTTGCCCCC

>1857

AGTGTAGCGGGTCATAGGGGCACCTGCAAAATATTGGGAGGGTCTGTCTCAGGCCAGC  
TGCTCTTCTTAGGGGGCACCTGGAGTTCGGGGGCTGTGGGTGAAAAGGGAGACCAG  
GGAGATCCTGGAGAGGATGGACGAA

>1858

CCCAGCAGTTCTACCTTGGGCATGGCTTGGCTTCAAGGATGTTCTCAGCAAGCTTAT  
CTCTGCCACAGGGAGAGCCTGGGGACCGCGGACAAGAGGGTCTCGAGGGCCCAAG  
GGTGATCCTGGCCTCCCTGGAGCCC

>1859

TCAGGACATGAGCCTGGGTTATCAGATCCACCTCAGCCTTGGTGGCCTTTACCACTCT  
ATTTTCCACAGGGTGACCGGGTCCCCCTGGGCTGGATGGCCGGAGCGGACTGGATGG  
GAAACCAGGAGCCGCTGGGCCCT

>1860

GACCTGGGGAATATGACTCCACTCTTTTCTGAGGTCTCAGGGTGTGATGCTGGCTGC  
ATCCTTACAGGGTGTGATGGCCCCAAGGGTGAGCGTGGAGCTCCTGGTATCCTTGG  
ACCCAGGGGCTCCAGGCCTCC

>1861

CTAGTGGTGCCACAGGCATAGGGGCTGCGGCGACGCACCCCGCTCCTTGACCTTT  
GCTGTCCCTCAGGCATCTGCCCTGCGGGAGATCGTGGAGACCTGGGATGAGAGCTCTG  
GTAGCTTCTGCCTGTGCCGAAC

>1862

CAGTGGGTTGTGCCCCGTGGAGTGGGGTGTAGCTGTACAGCCACCAGCATTCTCTTT  
CCACTCCTGCAGGGCCCCATCGGCTTTCCTGGAGAACGCGGGCTGAAGGGCGACCGT  
GGAGACCCTGGCCCTCAGGGGCCAC

>1863

TGGGGGTCAAGGGTTGGGCTCCAGGGGTCAAGGGTGCACAGGCAGCCCTGACAGAG  
CTTTCCCTCTCAGGGGGAGACAGGGAAGCCGGGAGCCCCAGGTCGAGATGGTGCCA  
GTGGAAAAGATGGAGACAGAGGGAGCC

>1864

GGAGTTCTGATGAGAGTCTGGGAGGGGTCTGCATTGACCATTCCCTCCCTTTGCTGT  
TTTTATTTCAAGGAGATCTGGGCTCCCTGGCCTGCCCGGTGCTCCTGGTGTGTTGGG  
TTCCCGGGTCAGACAGGCCCTC

>1865

CTTGAGGGGGCAGAGGGTAGGAGGGTCCCAAGTCACTCTCTGCCTCTCTTGCCCCTA  
TTTTTCTGGTAGGGTCTGGCAGGCCCCAGGGAGAGAAGGAATCCCAGGACCCCTG  
GGGCCACCTGGACCACCGGGGTAG

>1866

AGAGCTCAAACCTCCAGAGGGTGAGGGACCTTCAGCCCCTTACCGTGACTTCTTACCC  
AAACCAACCCAGGGTGAACGAGGGCCTCGGGGCTTGGATGGTGACAAAGGACCTCGG  
GGAGACAATGGGGACCCTGGTGACA

>1867

GGCTCGTTGTATTCTAAGCCCCAGCCTGATCTGGTCTGACTGAATCCCTCTCCTGGT  
CACTCCCACAGGGCAGCAAGGGAGAGCCTGGTGACAAGGGCTCAGCCGGGTTGCCA  
GGACTGCGTGGACTCCTGGGACCCC

>1868

CTATCCAGGGCGATTCTTTGGTCCCTCACTGACCTCCTCTGACCTCACATGGACCCT  
CTCCCTGCTAGGGATCCCAGGAAAGGATGGAGTGCCTGGTATCCGAGGAGAAAAG  
GAGATGTTGGCTTCATGGGTCCCC

>1869

AGCGAGGACTTTGGGAGAGGGGTCCATCTCTGGGGCCTCTGATTACTGACTCTGTCTT  
ATATCTCCCCAGGGAACCCAGGAATTGGGGGCTTCCCAGGCCCCAGTGGAATGATG  
GCTCTGCTGGTCCCCAGGGCCAC

>1870

GGCCCCAACCTGCCTGACTCTGATCCCCACTGCCTCTGACCCTGCTCACTTGGTCCCT  
GTGTCTGACAGGGTGAGCGAGGTCCCCCGGAGAGAGAGTGGTGGGGGCTCCTGGGG  
TCCCTGGAGCTCCTGGCGAGAGAG

>1871

TCAGGGGGTTGGCTGGGATGGCTGCCATGGTGACTTCAGGGCCCTGAGGCCCTGC  
TCTTGGCTCCAGGACCCCTCCCTAGTTATGCTGCAGACACTGCCGGCTCCCAGCTCCAT  
GCTGTGCCTGTGCTCCGCGTCTC

>1872

AAATCAGTGCTGCCACCTTGCCCCGGGGCCAGCAGCCACTGCTCCCAGCACACCCTG  
CCCTACCTGCAGAGCGGGTACCCCTGAGGATGATGAGTACTCTGAATACTCCGAGTAT  
TCTGTGGAGGAGTACCAGGACCC

>1873

TGACCTCCCCCTGACCTTTCAACCCTCTCTGATCCCACAAACCCTGCTGACTTGACCC  
CATTGGCCCAGACCCCTGTTCCCTGCCACTGGATGAGGGCTCCTGCACTGCCTACACC  
CTGCGCTGGTACCATCGGGCTGT

>1874

GGTGCCTCTGCCTGAGCGTCTCCGGGGAAGGTCAGATGGCTGACGACCGTTTCCAACC  
TGTCCTCACCAGGTACTGCCAGGACTGAGGCCAGATAATGAGCTGAGATTGAGCAT  
CCCCTGGAGGAGTCCGGGTCTCAG

>1875

GTGGGTACAGGTCTGAATGGAGAAGGGACCTGAGGGAGTGGGGCCTGGGCTGACTGG  
CTGCTCCTGGCAGGAGAACGGTGAGCTCTGCATGAATAGTCCCCAGTGAAGAGCAAT  
TGCTGCCAGCATTCAAGTGCCTGG

>1876

GTCAGGCAGGGACAAGTGATGTCAAAGTATCTCCCCATAGCCTTGACTCCATTGGCT  
GTGTCTCTGCAGACGCTCTATGGGATTTACTACAAGTGTCCCTGTGAGCGTGGCCTGAC

CTGTGAGGGAGACAAGACCATCG

>1877

ATCATTCTGTTTGTAGTTTTCTATCAGTCATTTAGTCAGCGTCATAATTCACGTTATC  
TTCCTTAGGTGGTGTCCCACTGATGAAGAGCAGGCGACTGGGTTGGAGAGGGAGAT  
CATGCTGGCTGCAAAGAAGGG

>1878

AGGGCTTATTTGGCCTAATGGTTC AATTCTTGTTTTTTTGTTTTGTTTTGTTTTGTTT  
TTTCTTCAGGACCCATACAATGTACTGGCCCAAAGGGAGCTTCAGGCACCAGGGAAG  
ACCCTAATTTAGTCCCCTCCA

>1879

AAAAGAAATTCATGTTGAAAGTCTCCCTTCTAGGTTGGATGACCATAAACCACCTTTT  
TTCCTTTTAGGTGAAGAGGACAATACCAGCGTCGTCTGGTTTTGGCTGCACAAAGGG  
CAGGCCAGCGATGCCCCGCTG

>1880

GGCCGAAGAAGGTCAGGCCCTCAGCTGCCTTCATCAGTTCCACCCCTCCAGCCCCAC  
CTCCTCCTGCAGACAAGCTGGTGTCTAGGAACTACCCGGACCTGTCCTGGGAGACTA  
CTCCCTGCTCTGGAAGCCACAA

>1881

TGCCCTCACAGTAGCCCCGCCCTGCCGCTGCACAGCGCCTGCTGAACTCACACT  
GTTTCTCCACAGCGCATGAGAGCCCAGCCCGCACCCCTGTGGCCATTGAGGAGGAAT  
TCTCTCCTCACCTGCAGCATCA

>1882

GTTGGGGATGAGTGAGGAAAGCCCAGCCAGGGAGGTCCTGCCAGCCTCTAACTC  
CAGCCCCCTCAGCATCTCCGGCTACGACATCCCTGAGGGCACAGTCATCATTCCGAAC  
CTCCAAGGCGCCACCTGGATGAG

>1883

GGCAGAAGAAGGTCAGGCCCTCGGCTTCTTGGTCAGTTCCACCCCTCCAGCCCCAG  
CTCCTCCTGCAGACAAGCTGGTGTCTAAAACCTACCCGGACCTGTCGTTGGTCTCTGCT  
CTGGAAGCCACAAAGAAGCTCAC

>1884

CACCTCTCACAGTAGCCCCGCCCTGCCGCTGCACAGCGCCTGCTGAACTCACACT  
GTTTCTCCACAGCGCATGAGAGCCCAGCCCGCACCCCTGTGGCCATTGAGGAGGAAT  
TCTCTCCTCACCTGCAGCATCA

>1885

GGCCACCCAGCCCTCCCTGAGCCTCTCCTTGTCTGAACTGAAAGTACTCCATCC  
TTTCTGGCAGGAGACAACCTAATGCCTGCCTATTACAAATGTATCCAGGAGGTGTTA  
AAAACCTGGAGCCACTGGTCCA

>1886

TGTGGGGGAGAGGCTGGGGTGGAGGGAGAGGCTCCTTCCACAGCTGCATTCTCATG  
CTTCTGCCGAGTTCTTCCCAATCCAGGTCTCCGGAGGCTGAAGCAGGCCATAGAG  
AAGAGGGACCACAAGAGAGAACAGC

>1887

TGGGCCTGTTGCCACTCTGTA CTTCTCTCCCAGGCCAGCCGCTCAGCCCGCTCCTTTC  
ACCCTCTGCAGGAGCCTGGTGGCAGGCCAGTGGAGGGACATGATGGACTACATGC  
TCCAAGGGGTGGCGCAGCTAGCAT

>1888

GCTGAGGGAGCGGCTGGAGGCTGGGCAGCTGTGGGCTGCTGGGGCAGGACTCCACCC  
GATCATTCCCCAGATTACAGCAGCGACTGTGGAGGAGCTAGACCACGAACTGGGCCCTG  
GTGCCTCCAGCTCCCGGGTCCCCTA

>1889

TCTCCCTTATCCCTCTCACTGCATTGCCCTGCTATGGGCCAGCTCACTTGCCACCTG  
TCTCTTGCAGAGCCTGGTCAAATGGGAGAGTGAGAATAAAATGGTCTGTGAGCAGAA  
GCTCCTGAAGGGAGAGGGCCCA

>1890

TCAACCTCCTCTCCAAAGCCACAGGACCCCAGGGCCTCTCAGGCTAACAACTACTT  
CTGTCCTTCCAGACCATGACGGCGGATGACGTTGTGTGCACCAGGGTCTACGTCCGAG  
AGTGAGTGGCCACAGGTAGAACCG

>1891

ACGTAAGTGAGGGGATAGATCTGTGTGATCTGAGAACTCTCACATTTGCTTGTTTT  
CTGGCTCACAGACATGTCGAGGAAGGCTTTTGTGTTTCCCAAAGAGTCGGATACTTCC  
TATGTATCCCTCAAAGCACCGTT

>1892

CTCCTGGAGCAGGGAGAGCGCTGGCCTTCTCCTCTCCGGCTCCCTCCATTGCCCTCCG  
GTTTCTCCCAGGCTCCCGACGTCCCTGCTCCTGGCTTTTGCCCTGCTCTGCCTGCC  
TGGCTTCAAGAGGCTGGTGCCGT

>1893

AAGCAACAATGGGAGCTGGTCTCCAGCATAGAAACCAGCAGTCCTTCTTGGTGGGGG  
GTCCTTCTCTAGGAAGAACTATATCCCAAAGGACCAGAAGTATTCACTCCTGCATG  
ACTCCCAGACCTCCTTCTGCTTCT

>1894

AGGCGGGGATGGGGAGACCTGTGGTCAGGGCTCCCGGGCAGCACAGCCACTGCCGGT  
CCTTCCCCTGCAGAATCTAGAGCTGCTCCGCATCTCCCTGCTGCTCATCGAGTCGTGGC  
TGGAGCCCGTGCGGTTCCCTCAGGA

>1895

TGGATAAATGAGAGAGGGAGGGAACAGTGCCCAAGCGCTTGGCCTCTCCTTCTCTCC  
TTCATTTGCAGAGGCTGGAAGACGGCAGCCCGGACTGGGCAGATCCTCAAGCAG  
ACCTACAGCAAGTTTGACACAACT

>1896

AGTGGTGGAGAGTTCTGTACCACTGTGGCACTTGGCCACTGCTACCGACGAACGA  
CATTTTCCACAGGAGCCGACCTGCCTACAGACCCGCTGGAGCTGTACAAGCAGGGCC  
TGCGGGGCAGCCTACCAAGCTCA

>1897

CTGGTGCTTCTTCCCCACGTTACCACTTGCCTGGACTCAAGTGTTTTTTATTTTCT  
TTTTTTAAAGGAACTTCTGTGCAACCCAGATTATCACCTTTGAAAGTTTCAAAGAGA  
ACCTGAAGGACTTTCTGCTTG

>1898

GGAGCCACTAAGCAGGTGCCACCCAGGAGATTCCATGGGTGCCACAAGCAGACAG  
ACTTTTCTTCCAGGGGAGATCATCGGGGACATGAGGCCAAGCCCCACTCCCGCCCT  
ACATGGCTTATCTTATGATCTGGGA

>1899

CTGCTTCACTGTCTCTGGGCTGTATACCCTGTGACTCCACCCCATCCTCACTCTGCT  
CTCTCTGCAGCTCCATAAATGTCACCTTGGGGGCCACAATATCAAAGAACAGGAGCC

GACCCAGCAGTTTATCCCTGTG

>1900

GCCCCATCACTGTGTCGGGGCCCAGAAGTTCGTTGGCTGACCTGGACTTTCTTGCCCTC  
TTCCCCACCAGCTGGAGAGAAAGGCCAAGCGGACCAGAGCTGTGCAGCCCCTCAGG  
CTACCTAGCAACAAGGCCAGGTGA

>1901

GGGCTTGAGATGGAAGAGAGGGCAGGACCCGGAGGAGCATCAGCTCAGTCCTTCCAC  
TCTCTATTACAGGGGGACTCTGGAGGCCCTTGTGTGTAACAAGTGTGCCAGGGC  
ATTGTCTCCTATGGACGAAACAATG

>1902

CTGCTCTTCACTGTCTCTGGGCTGTATACCCTGTGACTCCACCCCATCCTCACTCTGCT  
CTCTGTGCAGCTCCATAAATGTACCTTGGGGGCCACAATATCAAAGAACAGGAGCC  
GACCCAGCAGTTTATCCCTGTG

>1903

GGAGCCACTAAGCAGGTGCCACCCAGCAGATTCCATGGGTGCCACAAGCAGACAG  
ACTTTTCCTTACAGGGGAGATCATCGGGGACATGAGGCCAAGCCCCACTCCCGCCCCT  
ACATGGCTTATCTTATGATCTGGGA

>1904

CTGCTCTTCACTGTCTCTGGGCTGTATACTGTGACTCCACCCCATCCTCACTCTGCT  
CTCTGTGCAGCTCCATAAATGTACCTTGGGGGCCACAATATCAAGGAACAGGAGCC  
GACCCAGCAGTTTATCCCTGTG

>1905

AGCCCCATCACTGTGTCGGGGCCCAGAAGTTCGTTGGCTGACCTGGACTTTCTTGCCCT  
CTCCCCACCAGCTGGAGAGAAAGGCCAAGCGGACCAGAGCTGTGCAGCCCCTCAGG  
CTACCTAGCAACAAGGCCAGGTGA

>1906

GGGCTTGAGATGGAAGAGAGGGCAGGACCCGGAGGAGCATCAGCTCAGTCCTTCCAC  
TCTCTATTACAGGGGGACTCTGGAGGCCCTTGTGTGTAACAAGGTGGCCAGGGC  
ATTGTCTCCTATGGACGAAACAATG

>1907

AAATGCAGGAATATAACATGTGGCAAATATCAGGAGTGTGAAATAACCGATGCATTCT  
TTCTTGTTTAGGCATCATCTGGGGAGAGGATACACTGATGGAGTATTTGGAGAATCCA  
AGAAGTACATCCCTGGAACAAA

>1908

CAAATAGGACTAGGACCTGTAGTCTGGGGTGATCCTGGCTTGACAAGAGGCCCTGACC  
CTCCCTCTGCAGTTGCGGCGCCGCTTCGGGGACGTGTTACGCCTGCAGCTGGCCTGGA  
CGCCGGTGGTCGTGCTCAATGGGC

>1909

GTTGGAGTGGGTGGTGGATGGTGGGGCTAATGCCTTCATGGCCACGCGCACGTGCCCCG  
TCCCACCCCAAGGGGTGTTCTGGCGCGCTATGGGCCCGCTGGCGCGAGCAGAGGC  
GCTTCTCCGTGTCCACCTTGCGCAA

>1910

GGCACAAAGCGGGAAGTGGGAAGGCGGGGGACGGGGAAGGCGACCCCTTACCCGCA  
TCTCCCACCCCAAGGACGCCCTTTCGCCCCAACGGTCTCTTGGACAAAGCCGTGAGC  
AACGTGATCGCCTCCCTCACCTGCGG

>1911

CAAATAGGACTAGGACCTGTAGTCTGGGGGATCCTGGCTTGACAAGAGGCCCTGACC  
CTCCCTCTGCAGTTGCGGCGCCGCTTCGGGGACGTGTTACAGCCTGCAGCTGGCCTGGA  
CGCCGGTGGTCGTGCTCAATGGGC

>1912

GTTGGAGTGGGTGGTGGATGGTGGGGCTAATGCCTTCATGGCCACGCGCACGTGCCCG  
TCCCACCCCAAGGGGTGTTCTGGCGCGCTATGGGCCCGCTGGCGCGAGCAGAGGC  
GCTTCTCCGTCTCCACCTTGCGCAA

>1913

GCACAAAGCGGGAAGTGGGAAGGCGGGGGACGGGAAGGCGACCCCTTACCCGCAT  
CTCCCACCCCAAGACGCCCTTTCGCCCCAACGGTCTCTTGACAAAGCCGTGAGCA  
ACGTGATCGCCTCCCTCACCTGCGGG

>1914

TGGGGCCTGAGACTTGCCAGGTGAACGCAGAGCACAGGAGGGATTGAGACCCCGTT  
CTGTCTGGTGTAGGTGCTGAATGCTGTCCCGTCCTCTGCATATCCAGCGCTGGCTG  
GCAAGGTCCTACGCTTCCAAAAGG

>1915

CAGGTGCAGAATTGGAGGTCATTTGGGGGCTACCCCGTTCTGTCCCGAGTATGCTCTCG  
GCCCTGCTCAGGCCAAGGGGAACCCTGAGAGCAGCTTCAATGATGAGAACCTGCGCAT  
AGTGGTGGCTGACCTGTTCTCTG

>1916

GAGGCAAGAAGGAGTGTGAGGGCCGGACCCCTGGGTGCTGACCCATTGTGGGGACG  
CATGTCTGTCCAGGCCGTGTCCAACAGGAGATCGACGACGTGATAGGGCAGGTGCGGC  
GACCAGAGATGGGTGACCAGGCTCA

>1917

TGTGTTTGGTGGCAGGGGTCCAGCATCCTAGAGTCCAGTCCCCACTCTACCCTGCAT  
CTCCTGCCAGGGAAACGACACTCATACCAACCTGTCATCGGTGCTGAAGGATGAGGC  
CGTCTGGGAGAAGCCCTTCCGCT

>1918

CCCTTCCGTGGAGTCTTGACAGGGGTATACCCAGGAGCCAGGCTCACTGACGCCCTC  
CCCTCCCCACAGGCCGCCGTGCATGCCTCGGGGAGCCCTGGCCCGCATGGAGCTCTT  
CCTCTTCTCACCTCCCTGCTGCA

>1919

ATTGGGACTGCAGGGTGGGGCCACGAGGGACATGACCCCGTCCAGCAGGGCCTCCTG  
CTTGGCCCCACAGGTACAACCTGGGAGGACCACGCATGGTGTGTGTGATGCTGCCGGA  
GGATGTGGAGAAGCTGCAACAGGTG

>1920

AGGATGGGATACGGGTGAGGGCCTGTGTCTTGCTGGGGCGGCCTACAAGCTTGCCC  
TGCCCTCTGTAGGAATGGGCCTGAATGGCGCTTCAACCGATTGCGGCTGAACCCAGAT  
GTGCTGTCGCCAAGGCCGTGCGAG

>1921

GAAGGGAGTGTGGGGAGGCAGCCAGGAGGCCTGGGGCTGCCTTGTGCTCAGCAGTGC  
ATCCTCCCCGACCCAGCAACTTAGCTCTTTTTGGAGAGCGGCTGGGCCTGGTTGGCC  
ACAGCCCCAGTTCTGCCAGCCTGAA

>1922

GCAGGAGGAGGACACTGAAGGATGCTTCCAGCACCAAGATCTGAGGGCTGTCCCT  
GCTCCCTGGACAGGTGACAACTGTATCCAGAAAATCTACCAGGAACTGGCCTTCAACC

GCCCTCAACTACACAGGCATCGT

>1923

CCTGGGAGGGGTGTCCCGGGGCTGAGTCTCCTGTGCAAGGTCTGACCCTGCAGAC  
ATGGCTTCTGTAGACAGCGTTTCCCTTGCTGATGACGCTCTTTGAGCTGGCTCGGAACC  
CCGACGTGCAGCAGATCCTGCGCC

>1924

GGAAGGGTGCTGAGAGCACAGGGAGCCCCATCCAGCTGAGGACCCTTTCTGTGGATG  
CCCCACCTCCAGGCTCTACCTGTGGGTCTGTTTTGGAGCGAGTGGTGAGCTCAGA  
CTTGGTGCTTCAGAACTACCACATC

>1925

CCCCACCCCCTCGAGCTGAGAACCTCCCTCCCAGTCATTCCCTGATCCCTGCTCTGC  
ACCGTCCGCAGACATTGGTACAGTTTTCTCTACTCGCTGGGTGCAATGCCGCCTTG  
TTCCCGAGGCCTGAGCGGTATA

>1926

GATGGGAGGAAGCTGCCCCAGGTCCATGGGCTACTGACCAGGCCAGATGGAAACCCA  
GCCTCTGTCTAGGTGCTGAAGCACTTCTGGTGGAGACACTAACTCAAGAGGACATA  
AAGATGGTCTACAGCTTCATATTGA

>1927

CAGGTGTGGCTTAGAGCCCCGCACCTCCTCGCCGCGCGGGCCTGACTTCTAGCCAC  
GGGTCTCCGCAGTTGGCCCAGCGCTTCGGGCCGGTGTTCACGCTGTACGTGGGCTCGC  
AGCGCATGGTGGTGTGATGCACGGCT

>1928

GGCCCTCTGTAGCCATTTCTCCCCAAAATGGGTATTTAGAATAACCTTCTGCTGGCCC  
CTCTGCCTTAGGAATCATTTTTAATAATGGACCTACCTGGAAGGACATCCGGCGGTTTT  
CCCTGACCACCTCCGGAATA

>1929

TGGGTGACTGAGCAGGTGGAGGAGTCTCCTCACCCCATCTTCTGGTTGCCCTGACTG  
CCTGTTTTGTAGGCCAGCCTTTCGACCCACCTTCTCATCGGCTGCGCGCCCTGCAAC  
GTCATAGCCGACATCCTCTTCCG

>1930

TTGTTGGTCCAACACACACAATTATGTTGCATCCAGAAAAAAGTAGTAAAATATTTTTT  
TCCCTCTCTAGCTTTACAATAATTTCCAGCTTTCTACTACTTGCCTGGAAGCCACA  
GAAAAGTCATAAAAAATGTGG

>1931

GGAGGTGGCTGGTTCTGTGCTGAAAGGAGACAAGCAGCCCCTTCTCTCCGGTCTGTCT  
CCGGTATCACAGGAAAAGCACAGTGCAGAGCGCTTGTACACAATGGACGGTATCACCG  
TGA CTGTGGCCGACCTGTTCTTTG

>1932

TGGATGATGGGTGGATGCCAACTGGCCAGGAACCAATCCCTGAAATTTGTCCATTCA  
TATCTTGGCAGAGAAGCTCCATGAAGAAATTGACAGGGTGATTGGGCCAAGCCGAATC  
CCTGCCATCAAGGATAGGCAAGA

>1933

CTGGGGGTTTCCAGATGAAAGCCCACATTTTGTAAACATGACTCACTGAGACAGTCTTT  
GTTTCTCCTAGGGCACAGTCGTAGTGCCAACTCTGGACTCTGTTTTGTATGACAACCAA  
GAATTCCTGATCCAGAAAAGT

>1934



GTCTCACTGTTAACAGTGTCTGTCTCTGAAACTCCCTCAGTGTCTCATCAATACCATT  
GTTACTTCTAGGAAAACGAGTGTGTGCTGGAGAAGGCCTGGCTCGCATGGAGTTGTTT  
CTTTTGTGTGTGCCATTTTGA

>1935

AGTTAGTCTGGCTGTGCTTGTCTTTTTCCACCTCCCTCGCTGTGCCTGACCCTCTCTT  
CTTTCCACAGGTTCTCAGGCAAGAGCCACCTGCTATTGCCGAACCGGCCGTTGTGCTA  
CCCGTGAGTCCCTCTCCGGGGT

>1936

TGGCCTCTCGGTTTGTCTGCCCCACCTGGGTCGCGGAGACCATGTCCTTCTCGCTTG  
GCCTCTCCAGGACGTGGATGCAGCTACTCTAGCTCGCATTGACCTGGAGCGCAGAAT  
TGAATCTCTCAACGAGGAGATCG

>1937

GGCTGGGAATAGGGGTGTGAGGGTCGTGTGTGGGCCCTGAGAGGGACTGAAGCCCAG  
TCATGCCCTACAGGAGATCCGTGAGTTGCAGGCTCAGCTTCAGGAACAGCAGGTCCAG  
GTGGAGATGGACATGTCTAAGCCAG

>1938

ATGCTCCCAAGCTCATCCCTACCCGTGCCCTGCATCCTTCTCATTTTTGGGCCCTTTCT  
CTGCCCTTAGGTGTCAGACCTGACCCAGGCAGCCAACAAGAACAACGACGCCCTGCG  
CCAGGCCAAGCAGGAGATGATGG

>1939

GCCCCAAAGCTTTCTTTGGGCTGCTAGTGTCTCTTCCCTTCTTGACCTGGGTTCCCC  
CTCTCTGCAGAACGATTCCCTGATGAGGCAGATGCGGGAATTGGAGGACCGATTTGC  
CAGTGAGGCCAGTGGCTACCAGG

>1940

GGACTCCCAGCCCCTGGTATAGCCCAGCCTGGACTTGGTCAGGCTGAGTGTGCGATGG  
ACCCTGTTACAGAAACCAGCCCTGAGCAAAGGGTTCTGAGGTCCATACCAAGAAGA  
CGGTGATGATCAAGACCATCGAGAC

>1941

TGCGATCCTGGGTGGGATGCCTAGGCTGACGTCATCCTGCTAGCACATGTGACTGGACT  
CCTCTCCCAGGTCGTGAGTGGCCACACAGCAGCAGCATGAAGTGCTCTAAAGAC  
GAGAGACCCTCTGCCACCAGAGAC

>1942

TTGCTGCTTGTGCCGAACCTACTCTCAGGCACATTAGTCAGAAAATATTACGTTTGGT  
TGCTCCCCGAGGTTCTAAAAGTAAAGCTTAGAGGCCGTCAAATTGGCAATAGAAGC  
CGGGTACCACCATATTGATTCTG

>1943

TACCTCAGAGCATGGCTATGTGTGGAGAAATTGACTTGTGACATCACTAAACTGACTGC  
TTCTACTTCAGCCAGGTGAGGAAGTGATCCAAAAGATGAAAATGGAAAAATACTATT  
TGACACAGTGGATCTCTGTGCCA

>1944

AGTTCTATGTTACATTTATCTTGCTCTTCACTGACTACACAAATGATACCTCACAATTC  
CTTTTTCCAGGCCATGGAGAAGTGTAAGATGCAGGATTGGCCAAGTCCATCGGGGTG  
TCCAACCTCAACCACAGGCTGC

>1945

TACTTTGGTGATTTAATATTAATGTAACCTTTGGATTATCTGATGCTTTTCCATCTTGCTC  
GTCTGCAGGTGGAATGTCATCCTTACTTCAACCAGAGAAAACCTGCTGGATTTCTGCAA

GTCAAAAGACATTGTTCTGG

>1946

CTGTTAGGGAGCCGCTAACAACTGTATCCCCAGCCTCAGGGCCTCAGCCTTTCTGC  
CTTTCCTCCAGGGTGGACCCGAACCTCCCGGTGCTCTTGAGGACCCAGTCCTTTGT  
GCCTTGCAAAAAAGCACAAAGCGA

>1947

TGAACTTGGTTGTTCCCAATTGGCAATGATGTAATCTAAAAATAATTAAAGTTCCTATT  
ACTGTGATAGGTGTTTGAATCCAGTTGACTTCAGAGGAGATGAAAGCCATAGATGGC  
CTAAACAGAAATGTGCGATATT

>1948

ATCACTGCGCTACCGGCTAGTAACGGAGTCATTGCCATTGAGAGTGTGCATTTTTTTTTC  
CTCTTCCAGTTTTGTGCGCCCTAATTATCCGATTTCTGATGAATATTAACATGGAG  
GGCATTGCATGAGGTCTGCC

>1949

TGCTTGCTTTCTCCAGACTTTGAGCCCTGGCCTGATGTAGACCTTTTTGCTCTCTCCTC  
CTTCGTATAGGTACGTTCTCTGGAGCAGCAGAACAAGATGCTGGAGACCAAGTGGAGC  
CTCCTGCAGCAGCAGAAGACGG

>1950

ACCTTGGGAGCCCTTGTTGGGGTTGGGTGTTGGAAACCCAGCTCAGGCTCCCCTCTC  
CTCATCCCCAGGATGTGGATGAAGCTTACATGAACAAGGTAGAGCTGGAGTCTCGCC  
TGGAAGGGCTGACCGACGAGATCA

>1951

AAGGCTGTTGTGAAAAGGGGGCTCCTGTGTGCAGAGACAGGGCCTCACCCTTGCC  
CTTTCCACAGGAGATCCGGGAGCTGCAGTCCCAGATCTCGGACACATCTGTGGTG  
CTGTCCATGGACAACAGCCGCTCCC

>1952

GAGGGTGGACGCACGGAGGAAGAGAAGGCATACCCAACCTGACCTACTTACCTGTCC  
CCTACCCACAGAGAGGGCTTCCCTGGAGGCCGCCATTGCAGATGCCGAGCAGCGTGG  
AGAGCTGGCCATTAAGGATGCCAACG

>1953

CAGGGAGAAGGGCATGGAGCCTGCCATGGTGGGCTTCTGTACTCATGTGGCTACCTCT  
GTCCTCACCAGGTGGTCTGAGCTCGGCCTATGGGGGCTCACAAGCCGGCCTCAGCTA  
CAGCCTGGGCTCCAGCTTTGGCTC

>1954

GCCCAGCCAGGCCCTTCTGGCCGTGTGGCTCAGGAACACAGCCTCTTCTCTTTTTTT  
TCCCTCCTAGCCCTATTAGGCGAGGAGCTGCTCTTCTGGGGTATCGCGATCCACTTAA  
GGATGAGGCAGACTTGGTGACA

>1955

ATCTCGGGAGGTCACTGGGAGGCTGGTGCTGGGCAGCAGCTAGTGCCACTTCTCTGT  
CCCATATTTAGCGCCTCCAGAGCCAGAACTGAGCCCAGTGAGAGCGCACCTGGGGC  
AGCCTGGATTCTGGGGTGTCCCC

>1956

CCCCTGGGCCACTGCCTCCTCTCAGGGCAGTTGGCACTGAGTCAGGCTGGCCTTCTC  
GATGTCCACAGATACTGGCTCGCTGTGACATCATGGTGCTGCAGGAGGTGGTGACT  
CTCCGGCAGCGCCATCCCGCTCC

>1957

TTCTGTGGGTCTAATCAGGGGCACACCCAGAGGCTTGAGGCCCTGACCCCGCCTCCCC  
TTTTCTTGGCAGATTTGATGGCTCTGGGCCCTACAGCACCTGAGCAGCCCCCAGCTG  
GGGCGCAGCACCTACATGGAGACG

>1958

CGCCGTTTGGCACTTGCAAGCCAAAATCAAAGACGTGGGGCCACTGCTGCCATCCCT  
TTGTCCTCCCAGGTACACAAAACACAGGTCCTGAGTTCCTACGTGTACAACGATGAG  
GATGACGTCTTTGCCCGGAGCCA

>1959

CCTCACCCAGACGGGCTAGGGGGAGAAGGTCCAGGAGTGATGGCAGCCCTCGGTCC  
CTGGGCCTTGCAAGTCTTCCCAGCCTGGTGTGGTCCCGCTGCACACCACTCCTAAGG  
CCGTAGAGAAGGAGCTGAACGCCCT

>1960

GGGCAGTTTGTACAGGAGGGACAAGGATAGGGTGGCCAGCGCCAGCCTGATGGCT  
GCTGTGTCTTAGGACGTGATCCTGCTTGGGGACTTCAATGCTGACTGCGCTTCACTGA  
CCAAAAGCGCCTGGACAAGCTGG

>1961

GGGCAGCAGCAGGGTCACAGGGAAGCCCCTCGGCCCCGGGCACTGACTGCCCCAC  
CACCCATTCCCAGGCCCTCAACATCAGTGACCACTACCCCGTGGAGGTGGAGCTGAAG  
CTGAGCCAGGCGCACAGCGTCCAGC

>1962

TATTCCTGCTTCCACAGCGGCAGACCAGCCAGTTGCAGGCACCAAGCCTTTGGGCAT  
GTTTCCTTCTAGGTCGGCGCCTGCATCGTGAATTCAGAAAACAAGATTGTCGGGATTGG  
GTACAATGGGATGCCAAATGGGT

>1963

GTGTTAACACTTAGTAAATCTTCATGAGCTGCAACCAAAGTTTTTCTTCTTTCCCTTT  
CAACCCACAGTGTGCCATGCGGAGCTGAATGCCATCATGAACAAAATTTCGACCGATG  
TGAAAGGCTGTAGTATGTATGT

>1964

CTCGTTCCGCTGTCTTTTGCAAGCATCTGTAGGTGCGTACACTAAGGGAGCTCCATTG  
TTACCTTACAGGTATAAAGAAAGTATTTTCATGTCTGATAAATACCATGATAGTGACGA  
GGCAACTGCTGCGAGGCTCCT

>1965

GTAAAGCCAAAGTAAACAAATTGCTTTCCTACTACTACCAGATAATAATTGTATTTGTTT  
TTATTTTATAGGAAATTCATACCGAAGTGCAGCAAGATTGTCATTGACTTTGATTCAATTA  
ACAGCAGACCGAGTCAAAAAG

>1966

TTTAATTAAGAAAAATATTA AAAAGGAAAAATGAACTACTTATGATTTTCTTTTTTGCA  
TTTTTCTAGAGGATGACTTGGTTACAGTCAAAACCCAGCGTTTGCAGAATCTGTAC  
AGAGGGAGATGTCAGGTGGGA

>1967

GATTCTATACAGCTAATTTTCTAATGCTGGATAAACATTTGGACTTCTCCATCTGTCTTC  
CTCTTCCAGACATCTGTGCAGGTCCATCACCAGCAAATGGCGTGATTGAAGCTCTTTT  
GGTACCTGATGGGGGAAAAG

>1968

CCACTAAATTTTGCTTGGTTGCTTCTCATTTTCAGACAGTGCCAGTGGCATATACTTTTCT  
TGTTTTTCAGCTGCTCCTGCTAAGGCCAAGCCGGCTGAAGCTCCTGCTGCTGCAGCCC

CAAAAGCAGAACCTACAGCAGC

>1969

AGCACTGGCACAAACTCAGCAGATGTTTCTTCCTTGTCTGATGCAGCTTATCCTCTT  
TTCATTTTCAGTGTCTGCAGTAAAACCCACTGTTGCCCCACCACTAGCTGACGCAGGA  
GCTGGCAAAGGTCTGCGTTCAGA

>1970

TCTGACTACACGGGGAATGCTTGACCCAGAGAGATCAGATTGTCAATGCTTGTCCACT  
CTTACTTTCAGGAGAAAATGAACAGGATGCGGCAACGCATTGCTCAGCGTCTGAAGGA  
GGCCCAGAATACATGTGCAATGC

>1971

GGATTGAGAAACCTGCTGTGAAAGTCAAATGCAGGCTTTGTGGTCAGTTTGTTTTGT  
AATGTTTTCACAGTAACATCCAGGAGATGAGGGCTCGGCACAAAGAGGCTTTTTTGAAG  
AAACATAACCTCAAACCTAGGCTTC

>1972

TGCACATATTACCTCATTAGTCTTGGCCTTCTGGGGAGTTGTATGTAACATGTATTTTCT  
CTCTCATAGTGATTGACGACACAACCAAAGAGGTGGTGTATACGGATTATATTGACATC  
AGTGTTGCAGTGGCCACCCC

>1973

TTCAAGGGAGTTGTTAACTATAAAAGGTACTATTAATTTGCAACTGAAAACAGCTTTTC  
ACCCCTTCAGGGTCTGGTGGTTCCAGTCATCAGGAATGTGGAAGCTATGAATTTGCA  
GATATTGAACGGACCATCACTG

>1974

GGATTATGGACTGACTTTAGGTGAAGGAAACTGGGGTGGCTTAATATTTCAATTATGAA  
ATCTGTTTTAGGCCCGAAAGAATGAACTTGCCATTGAAGATATGGATGGTGGTACCTTC  
ACCATTAGCAATGGAGGCGTTT

>1975

GCTAAATCTCCTTCAGCGAGGCTGGCTGTGGCTTGCTGGAGACAAACCTATTTACCTTT  
CCTCTCTGTAGGTAGAGGTGCGGCCCATGATGTACGTGGCACTGACCTATGATCACCGG  
CTGATTGATGGCAGAGAGGCTG

>1976

CCTAGCCCTATGCAGCCCCACAGTGGGACCCTTGCATGGACCTCAACCATCAGAATCTT  
TTCTTTTGCAGGTCGTTACTCTCTGACCTATATCTACACTGGGCTGTCCAAGCATGTTGA  
AGACGTCCCCGCGTTTCAGGC

>1977

GACTAAGAGTTATTTTGATAAATTTCTACCAGGCTGACTGTCTCTGTGGGGTCGGG  
GGAGTTTTCAGGGTCTCACGTATTGCAGGGAAGGTTTGGTTGTGAGATCGAGAATAAC  
AGAAGCAGCGGAGCATTCTGGAA

>1978

GGGTAGGAAGAGACCTGGGCCGGGAGAAGTCCACCTCAAGCCTGCAGTGTCACTC  
TATCCCTCCACAGATCCTCCCTCTGTGGTGGTCAACAGCCACCAGGCCCCAGGAGAAA  
AGAAGAACTGAAGTGCCTGGCCTA

>1979

GGGAGAGAAGGGAGGAGCCCTTGAGGCTAGAAGGGAAGTCAGATCTCCTCCTCTC  
CCAAAACCTCCAGTGTATGCCACGTTGAGGGACCTGAAAACACAGGGCCGGCTGTGG  
GAGGCGGCCCGGCCCTGGCATGCC

>1980

GGAGCACGAGGGGACAGGCCGTGCTGAGGGTGATGCTGAGGCGGGCTGGTCGGGCCT  
CTTGCTCCGCAGTGTGTAACGCAGGCCTGGGCCTGCTGGGGCCGCTGGAGGCGCTGG  
GGGAGGACGCCGTGGCCTCTGTGCT

>1981

GAGGGGACCGTCTGCCGGGGATGACCCCTGGCCGCTGCGCCTCAGGAACCTCGT  
CTCCCCACCTAAGGGCTGCCTTCAATGACGTTTATTGCGCCAGCAAGTTCGCGCTCGA  
AGGCTTATGCGAGAGTCTGGCGGT

>1982

TGGGGTTGGGGCTGGGACTGGGGCCTGGCTGGCGTCCGCCCCCTCCCACTCGTTGCTC  
TCCGGCCAGCAGCTTGAGCCTGATCGAGTGCGGCCAGTGCACACCGCCTTCATGGAG  
AAGGTGTTGGGCAGCCAGAGGAG

>1983

ACTCCAGGAGTGGGGGCGGTGCGTCTCCGGCCGGCAGCGGTGGCCACAGCTCTCCT  
CCCGCCGCCAGGTCTTCTCACCGCTTTCGCGCCCCGAAGCCGACCCTGCGCTAC  
TTCACCACCGAGCGCTTCTGCCCC

>1984

TACTGTGATCCAGCATGTCTCTCGGCGTTTGAGGAGACATCCCCACTGACCTGCTCTT  
TCTCTCCCAGCAGTCTTAGGCGTGAGCTCAGCGCGGTGGGTGAGAACGGCGGGGA  
GAAACCACTCCCAGTCCACCCTG

>1985

GTGTGCCATGTGTCATTTAAAGACTATTAATTACACTAATATAGTTTCTTTCTCTCTT  
GGATAATAGGCAGTTGTTCCGTATGGACTTGAAGCCCTAGGTCCAAGAGAGCCTTG  
GAGAATTTACTTCCACAAAG

>1986

TACATGTTTCTTTTGCCAAAGGGTGATTTTTTAAATAACATTTGTTTTCTTATCTTG  
CTTTATTAGGTCGGAGACCATGAGAAACAGCGTCAAATCATCTTTTCATGATCCCAAGC  
TGAAAGGCAAGCCCTCCAGA

>1987

GCTGGGGACAAGGAAATTGAAGCTGGAGTTTGTGTTTTAGTAACCAAGTAACGACTCT  
TAATCCTTACAGATGGGAAAGGGCTCCTCAAGTATGCCTGGGTCTTGGATAAACTGAA  
AGCTGAGCGTGAACGTGGTATCA

>1988

AAGGCTTGCTTTGTACTGGTTTTGTCATTTGGAGAGTTGACAGGGATATGTCTTTGC  
TTTCTTTAAAGGCTGACTGTGCTGCCTGATTGTTGCTGCTGGTGTGGTGAATTTGAA  
GCTGGTATCTCCAAGAATGGGC

>1989

AAGACCATTGTTAAAAAGCTCTGGGAATGGCGATTTTCATGCTTACACAAATTGGCATGC  
TTGTGTTTACAGATGCCTTGGTTCAAGGGATGGAAGTCACCCGTAAGGATGGCAATGC  
CAGTGAACCACGCTGCTTGAGG

>1990

AAAGTTGAATTTGAGTTGATAGAGTACTGTCTGCCTTCATAGGTATTTAGTATGCTGTAA  
ATATTTTAGGTATTGGTACTGTTCTGTTGGCCGAGTGGAGACTGGTGTCTCAAACC  
CGGTATGGTGGTCACCTTTGC

>1991

TAACTTATTGCAGAGGCTAAAGTCATTTGAGACTTTGGATTTGCACTGAATGCAAATC  
TTTTTTCCAAGGTGATTATCCTGAACCATCCAGGCCAAATAAGCGCCGGCTATGCCCT

GTATTGGATTGCCACACGGCTC

>1992

AAAGTTGTGTTAAAGATGAAAAATACAACCTGAACAGTACTTTGGGTAATAATTAACTTT  
TTTTTTAATAGGTCGCTTTGCTGTTTCGTGATATGAGACAGACAGTTGCGGTGGGTGTCA  
TCAAAGCAGTGGACAAGAAGGC

>1993

GCTGTCTGTGGTTCTGGGGAGGAACAAGGGGAGATGTGAAGGAAGGACACTTAGCTA  
TCCTCCCTGCCAGGGTCTGAGACTTCCACCTTTGAGACCCCTTTGGGTGCTAAGACGC  
TGCCTGAGGATGAGGAGACACCAGA

>1994

GGGACTCAAGACCCATGTGAATTCATGTAGGAAGGATGCTCCATTCTTTGTCTTTTATC  
CTGCCCTGTAGTTTACTTGCCGGAGGTGCTACAGGGGCAACCTGGTTTCCATCCACAA  
CTTCAATATTAATTATCGAATCC

>1995

GATACGGGGCCAGGTCTGCTTCTCTGCCTTCCCTCTGCCCCATCCCTTCTCCCTCTTG  
CTTTCTCCAGGGTCGCTGCAGACGCTTTCAGTGGGTTGACGGCAGCCGCTGGAACCTT  
GCGTACTGGGCTGCTCACCAGC

>1996

GGGGTCGCTGCGTTCAGGGAACCTCTCCAGCAACCTGCCCTATAAAGGGTGTCTCTC  
TTTCTTCCCAGCTGGTCCTGCCGCTGCTGTGTTGAGAGAGCTGCGTTGCGTTTGTTTA  
CAGACCACGCAAGGAGTTCATCC

>1997

AGAGAAATCCCGCAGCCTGGGTCTTCAACCTTGGTATCTCATGAGTGTATCTTCTTTTT  
CTTTCCTCAGAGCCTCCCTGAAGAACGGGAAGGAAATTTGTCTTGATCCAGAAGCCC  
CTTTTCTAAAGAAAGTCATCCAG

>1998

AAGGAAGCTGTCCTTCCACAGCCACCCTTCTCCCTCCCCGCTGACTCTCAGCCTGGC  
TATCTGTTCTAGAATGTCCTGCCTGGCTGTGGCTTCTCCTGTCCCTGCTGTCGCTCCCTC  
TGGGCCTCCAGTCTGGGCGC

>1999

ATCCTACGGCCTGTGGGCCAGGGCCAGAGCCTTCAGGGACCCTTGACTCCCCGGGCTG  
TGTGCATTTAGACGGGCTGTGCTGAACACTGCAGCTGAATGAGAATATCACTGTCCC  
AGACACCAAAGTTAATTTCTATG

>2000

TGGGGCTGCTGAGGGGCAGGAGGGAGAGGGTGACATGGGTGAGCTGACTCCCAGAGT  
CCACTCCCTGTAGGTCGGGCAGCAGGCCGTAGAAGTCTGGCAGGGCCTGGCCCTGCT  
GTCGGAAGCTGTCCTGCGGGGCCAGG

>2001

AGTACAGGAACTGTCGATTCCCTTCCCTTTCTGTGGCACTGCAGCGACCTCCTGTTTT  
CTCCTTGGCAGAAGGAAGCCATCTCCCTCCAGATGCGGCCTCAGCTGCTCCACTCCG  
AACAATCACTGCTGACACTTTCC

>2002

TTCTTTCATAAAGACCCAACCCTATGACTTTAACTTCTTACAGCTACCACAGCCCCTGG  
GCCGCAACAGTTGTTACAGGTTCTGGTCATGCAAGCTTACCCAGGTGGAGAAAAG  
GAGACTTCGGTACCCAGAGAAG

>2003

GAGACATTGAAAGTCAGGGTAAAGCTGAATATAACATTGCTGAAATGTTTTTCCTTGTG  
TATTTAACAGGGCTGAAGACATTATGGAGAAAGACTGGAATAATCATAAGAAAGGAA  
AAGACTGTTCCAAGCTTGGGAAA

>2004

CATAACTTGAAAAATAAACACTTCTATGGGATTTGACTTTATTTTCTCCATTGTCTTA  
CCTTTTACAGGTGTTAATATAGTGAAAAGGAAGCTTGCAGCTCATGACAATTTGAAGCT  
GACAATTACACAAGAAGGAAA

>2005

CATGTGTAAGACCCTAATAAATGCCATTATTATTATTATTATTATTATTATTATTATT  
ATGTAGGGGACCTGGAGCCTTGAGGGAAATAAACTTATTGGAAAATCAAACGGACAG  
ACAATGGAAACGAACTGA

>2006

CCCTTCTCTCTCTGAGTACCAGATCCTCCCTGATACCCCGACCCCATGGGCATCCTCT  
ATCCCCTCAGCGGCCCTGGGAGAGCCTCAGCTCTGCTATATCCTGGATGCCATCCTGTT  
TCTGTATGGAATTGCCTCAC

>2007

TAAGAGATGTAAAATTTTCATGATGTTTTCTTTTTGCTAAAACTAAAGAATTATTCTTTT  
ACATTTACAGTTTTCTTGATCATGAAAACGCCAACAAAATCTGAATCGGCCAAAGAG  
GTATAATTCAGGTAAATTGGA

>2008

TATCTACAGGGGAGGACCGGGCATTCTAAGCAGTTTACGTGCCAATTCAATTTCTTAAC  
CTATCTCAAAGATGGAGATCAGTGTGAGTCCAATCCATGTTAAATGGCGGCAGTTGCA  
AGGATGACATTAATTCCTATGA

>2009

CAGTAGTTCATGTACTTTTTAGAAATGCATGTTAAATGATGCTGTTACTGTCTATTTTGC  
TTCTTTTAGATGTAACATGTAACATTAAGAATGGCAGATGCGAGCAGTTTTGTAAAAAT  
AGTGCTGATAACAAGGTGGT

>2010

ATTTTTGTAATACATGTTCCATTTGCCAATGAGAAATATCAGGTTACTAATTTTTCTTCTA  
TTTTTCTAGTGCCATTTCCATGTGGAAGAGTTTCTGTTTCACAACTTCTAAGCTCACC  
CGTGCTGAGGCTGTTTTTCC

>2011

CAGCACACATATTTATTTTTTCTAGATCAAATGTATTATGCAGTAAGAGTCTTAATTTTG  
TTTTACAGGTTGTTTTGAATGGTAAAGTTGATGCATCTGTGGAGGCTCTATCGTTAAT  
GAAAAATGGATTGTAAGT

>2012

AGTAGTCACTTAGAAAATCTGTGTATGTGAAATACTGTTTGTGACTTAAAATGAAATTTA  
TTTTAATAGGTGAACATAATATTGAGGAGACAGAACATACAGAGCAAAGCGAAATG  
TGATTCGAATTATTCCTCACCA

>2013

TGGGAACTCGCCCCACCTGTGTCCGGAACCTGCTCGCTCACGTCCGCTTTCCCTTCT  
GTTTTGTTCTAGGACTTCTGCACGGACCTGGCCGTCTCCAGTGCCAACTTCATTCCCAC  
GGTCACTGCCATCTCGACCAGTC

>2014

TGGGGTGGGTGAATGGAGGTGATGGCAGACACTTTTACTGAATGTCGGTCTTTTTTGT  
GATTATTCTAGTTATCTCCAGAAGAAGAAGAGAAAAGGAGAATCCGAAGGGAAAGGA

ATAAGATGGCTGCAGCCAAATGCC

>2015

TTGGAGATTGAGCATAAGGGCCCTTGAGTAAGACTGTGTCTTATGCTTTCCTTTATCCCT  
CTGTATACAGGAGACAGACCAACTAGAAGATGAGAAGTCTGCTTTGCAGACCGAGATT  
GCCAACCTGCTGAAGGAGAAGG

>2016

GAAATGAGGGGGTGGGGAAATGGTACGGAGGTTTCATAACTGAGGAAATGACCACGAC  
TGCACTATTTAGGAGCAGACAAGATGGAGACAAATTCCTCTCTCCCCACGAACATCT  
CTGGAGGGACACCTGCTGTATCTGC

>2017

CATAGTCAGCCTGTATTCTATACTCATTAGTGCATTACCAGTTTGTTCATTCCCTTTTGT  
TTTCTGCAGATAACAATGCTGGGAATTCAAGGAGATCTGAAGTGGTCCACAGATCCAG  
ATAAAGGTCTTTCATCTCTC

>2018

CAGGGATCAGAAGCTGCCTGGCCTTTTCTTCTGAGCTGTGACTTGGGCTTATTCTCTCC  
TTTCTCCGCAGTTGCTGCTGACACGCCGACCGCTGCTTTCAGCTACACCTCCCGA  
CAGATTCCACAGAATTCATAGC

>2019

AGGGCCATGGTGGGCCAGGATCCCCGGCTGGATTCCCCAGTGCTTAACTCTTCCTCC  
CTTCTCCACAGCTTCTAACCAAGAGAGGCCGGCAGGTCTGTGCTGACCCAGTGAGG  
AGTGGGTCCAGAAATACGTCAGT

>2020

CTCTAGTTCCTGCAGCTGGGGTGGGGCGTGCCTGCATTTTCAGGTGCCTTAACCGAC  
CCATTTCCGCAGAGCCTCTGTGCTGAGCCCTGACGTGCCCGTGCCATCCGACCATG  
GAGGGACTGAGTCCAGCCCAGGCT

>2021

AAGCGTTCAGCTGCAGTAGCATATTCAAGTGTGCTAGTTAGTAATTATCTTTTAATTT  
TTTGTTTTAGTTAAAAGATTGGAAGACCCGTTTGTAGCTACTTCTTACAAAATTCCTCTA  
CTCCTGGGAAGCCCAAACC

>2022

GGAGAAACATAAGGAATCATTTGGTCTCTCAGTTCTTACATTCTGCATGCTCTTTTCTC  
CCCCCTTTCAGATGGTCTTGCTGCATTGAGGGCTTTTTTAAAGTCGGAATTCTGTGAAGA  
AAATATTGAATTCTGGCTGGC

>2023

TGTTTTCAAATACTAAATTTAATCTTTAACTCTGAATACCAAATAACAACCTTTTTTGT  
TTATTTTCAGATAAACATAGATTTCAAACCAAACTCTGATTGCCAGAAATATAAAGA  
AGCTACAAGTGGCTGCTTTA

>2024

GAGGCAGTGTCTATTGGAGAGGCTTACTCCAGCTGGCGGAAGCCTCACGTACTGCTTGT  
CTCTCTGCCAGGCTCTGGAGCTCATGACGGTGTGGTGGGCAGCCCCGCAAGGATG  
GGCTGGTGTCTCTCTCACCACCT

>2025

GACACCTGCCCTTCTGTCCAATCCTCCCAGGCAGCCTCTTACCATCACCTGTTCTT  
TCCCCCTGCAGCTGCCCCCTCCCTGGCTTCAGTGCAGTGGTGGTCAGCTCAGTGCCC  
CTGGGGGGTGGCCTGTCCAGCTC

>2026



CCCTGGAGTGTATTGAAGCCACTGCTGCTTCCACCAGCCCTAGCCTCCCCACCTCAC  
CCTGTACTGCAGACTCGGGACAATAGCTGCCCGCGCCCAGGTGTGTCAGCAGGCCGA  
GCACAGCTTCGAGGGATGCCCTG

>2027

TGTGCCACTGCCTGGCGCAGCAAGCACACGCTTGGCCTCGTCATCTCCCCATTGTA  
ACTCCACCCAGGTCCTTGGAGACCAGCCTGGTGCCACTCTCGGACCCCAAGCTGGCC  
GTGCTCATCACTAATAATGTC

>2028

TGCTGGTCTCACAGGCGTCGGGGCCCCAGGCAGTGAGAAGGCGGCTGCTGACTCCT  
CTTCTCCCCAGCTGCCAGGGACCTGGTGAGCAAAGAGGGCTTCCGGCGGGCCCCGG  
CACGTGGTGGGGGAGATTCGGCGCAC

>2029

CCCTCTGGGCGCCCCGCTCCTGCCGGGCACAGGCCGGCCAGGCCACCCCTTCAATA  
TCCTCTCTGCAGAGACTATGAGGTGAGCTGCCAGAGCTGGACCAGCTGGTGGA  
GGCTGCGCTTGCTGTGCTGGGGTT

>2030

CAGGGCCTGGGCGGGCAGGAGCGGCAGCTTCCCGGGCCCTGCCACTACCCCCAGC  
CCGCTCTTACAGGAGCACTACGGCGGGACTGCCACCTTCTACCTCTCTCAAGCAGCC  
GATGGAGCCAAGGTGCTGTGCTTGT

>2031

GGGTGAGACCCAGGAGAGAGGGAGCTAGAGGGGGGAGCTCTGAGGACTGATCTTGA  
CTGTCTGCCCCAGACCATCAGCATATCCGCTACAACCCGCTGCAGGATGAGTGGGTG  
CTGGTGTGAGCTCACCGCATGAAGCG

>2032

AGTCTTTGAAGCCCACCAGGTAAGTGGTGGTATGGGGCAGTGAGTGCTTCTAGCCTAT  
CCTTGTGCGGTAGGTGAATCCCCAGTACGATAGCACCTTCTGTTTGACAACGACTTCCC  
AGCTCTGCAGCCTGATGCCCCCA

>2033

TGGGGTTGCCCCTGCCCTAGCACAGCCAAGCCCTACCTCTCGGTTATCTTTTCTCCCG  
TCACCACCCAGTAAGGTCATGTGCTTCCACCCCTGGTCGGATGTAACGCTGCCACTCAT  
GTCGGTCCCTGAGATCCGGGCT

>2034

ATATGCCAATGATGTGGAGGCTTGGAGGTAAGGACCTGCCTGTTCTTCTGCTTTTG  
CCCCTTGACAGGTATGGGCCAGCAGTTTCTGCCCAGATATTGCCAGCGTGAGGAGCG  
ATCTCAGCAGGCCTATAAGAGTC

>2035

TGCCTATTTGCTGACCACACTCCGGCTCCTATGTACCTTGATGACTTCTATCCATTCT  
GTCTTCTAGGAACGTCTGGTCTAACCCAGTGAGCACTGGTTAGTACTGGTCCCCTTCT  
GGGCAACATGGCCCTACCAGA

>2036

ACTGGATGGAGGTTGCTCCCAGTAGGGTCAGCATCTGGACCCAGGCTGAGAGTCAG  
GCTCTGATTCCAGATCTAGCCTCCATCATGAAGAAGCTCTTGACCAAGTATGACAACCT  
CTTTGAGACGTCTTTCCCTACTC

>2037

GGGAGTAGGTGCTAACCTGGATAACTGTAAAAGGGCTCTCTCTCCCCACTGTCTCTCTT  
CTTTCTGTGAGGGCTCCACAGGATCAGAGGCTGGGGCCAACCTGGAACCATTTGGCA

GCTGCACGCTCATTACTACCCTCC

>2038

TGAAGTCCATGCCACCATTCTTGGCAGCCCAGCCCTTATCCTCCTTAATTGCTCCCTGTC  
CCTTTTCCAGGCTGCAGAGAGACTAAGGGCACTTCTGAGGTTTATTACCACCTGGGG  
CAGAAGGACAGGGAGACAGCAA

>2039

AAAAGTCCAGGTCGCTTCTCAGGATTTGTGGCACCTTCTGACTGTCAAAGTCTTGT  
CAATCTCACAGGCTCCTGGTTGTCTACCCATGGACCCAGAGGTTCTTTGACAGCTTTGG  
CAACCTGTCCTCTGCCTCTGCC

>2040

AAAAGTCCAGGTCGCTTCTCAGGATTTGTGGCACCTTCTGACTGTCAAAGTCTTGT  
CAATCTCACAGGCTCCTGGTTGTCTACCCATGGACCCAGAGGTTCTTTGACAGCTTTGG  
CAACCTGTCCTCTGCCTCTGCC

>2041

ATCTGGAGGCCAGGCTGGAGCTCTCAGCTCACTATGGGTTTATCTTTATTGTCTCCTTTC  
ATCTCAACAGCTCCTGGGAAATGTGCTGGTGACCGTTTTGGCAATCCATTTCCGGCAA  
GAATTCACCCCTGAGGTGCAGG

>2042

ATCTGGAGGCCAGGCTGGAGCTCTCAGCTCACTATGGGTTTATCTTTATTGTCTCCTTTC  
ATCTCAACAGCTCCTGGGAAATGTGCTGGTGACCGTTTTGGCAATCCATTTCCGGCAA  
GAATTCACCCCTGAGGTGCAGG

>2043

TGGCCTAGGGCTGCTCACATATTCTGGAGGAGCCTCCCCTCCTCATGCCTTCTTGCCTC  
TTGTCTTAGATTGGTCGATTGGGCGCCTGGTACCAGGGCTGCTTTAACTCTGGT  
AAAGTGGATATTGTTGCCATC

>2044

CCCAAAGCTGGTGTGGGAGGAGCCACCTGGCTGATGGGCAGCCCCTTCATACCCTCAC  
GTATTCACCCAGGTTTACATGTTCCAATATGATTCCACCCATGGCAAATTCATGGCACC  
GTCAAGGCTGAGAACGGGAAGC

>2045

TCCCTTGGGTATATGGTAACCTTGTGTCCCTCAATATGGTCCTGTCCCCATCTCCCCCCC  
ACCCCGTAGGCGAGATCCCTCCAAATCAAGTGGGGCGATGCTGGCGCTGAGTACGT  
CGTGGAGTCCACTGGCGTCTTC

>2046

GGGAGGGGAAGCTGACTCAGCCCTGCAAAGGCAGGACCCGGGTTCATAACTGTCTGC  
TTCTCTGCTGTAGGCTCATTTCAGAGGGGGAGCCAAAAGGGTCATCATCTCTGCCCCCT  
CTGCTGATGCCCCATGTTTCGTCA

>2047

AGAAGCGGCCAGCCTGGCACCTATGGACACGCTCCCCTGACTTGCGCCCCGCTCCCT  
CTTTCTTTCAGCAATGCCTCCTGCACCACCAACTGCTTAGCACCCCTGGCCAAGGTCA  
TCCATGACAACTTTGGTATCGTG

>2048

CTTTCAAGGTGGGGAGGGAGGTAGAGGGGTGATGTGGGGAGTACGCTGCAGGGCCTC  
ACTCCTTTTGCAGACCACAGTCCATGCCATCACTGCCACCCAGAAGACTGTGGATGGC  
CCCTCCGGGAAACTGTGGCGTGATG

>2049

AGTGCAGGGTCTGGCGCCCTCTGGTGGCTGGCTCAGAAAAAGGGCCCTGACAACTCT  
TTTCATCTTCTAGGTATGACAACGAATTTGGCTACAGCAACAGGGTGGTGGACCTCATG  
GCCACATGGCCTCCAAGGAGTAA

>2050

GACGGAAGGAGGGGGATTGACTGAATGAAGGCTGACCCCTACTGCCACCTCTCCCT  
TTTCTTACCCAGAATTGGAGCTGGCCATTAGAATCACTCTTTACGCAGTGATCTTCCTGA  
TGAGCGTTGGAGGAAATATGCT

>2051

AGGAAGTCCCCTGATGCTTGTGTAGTGCAAGTTTCTAGGTGACTCCTTCCTTCTCTT  
CCCTTGTTTAGGGGTGTCTGTGAGTGTGTCCACGCTAAGCCTCGTGGCCATCGCACTG  
GAGCGGTACAGCGCCATCTGCCG

>2052

CCTTGGCTTTTTCTCCATCTGTGATTACAGCTGGACAGAAACCCGAGTGATCTGTCTGT  
GTTGCCTCAGGTCCGACTGCTGCTTCTGCTCTTGTCTTCATCCCGGGTGTGGTTATG  
GCCGTGGCCTACGGGCTTATC

>2053

TCAGGTGGGGACTGGGCTGGAGACTGGGGGGACTCGCCTTTTTCTCTGACCGCCACC  
CTTTGTGCTCAGGGGCTGTTACCAGAACGGGCGTTGCCGCCTGAGACTGGCGCGG  
TTGGCGAAGACAGCGATGGCTGCTA

>2054

GACTGGCTCTGACTTCAGTTCCTAGAAGGTAGGCATCCTTCCCCATTCTCGCCTCTCT  
CCCCTCTCAGACCCGTCGAAGAAGCAGGGACCATGGCTGGAGGAAGAAGAAGAAG  
CCTATGGATGGATGGACTTCGGCCG

>2055

GATGGGCGGGGCTGAGGCTGGAGTGAGCGGGGCCGGATGGGCTCACGGCGGGCCG  
GCCCTCGCCAGGACGGCTACATTGATTCATGGAGTACGTGGCAGGCCTCAGCTTG  
GTCCTCAAGGGGAAGGTGGAACAGA

>2056

GTCCCAATCCTACCCCTGAGATAGGATAAGGATGGGCCCTCTCACTTCTGCCCTTC  
TTCCCTCCAGGCCATTCGCGCCATTAACCCCTGCAGCGATACCACCATGACTGCAGAG  
GAGTTCACCGATACAGTGTCT

>2057

CCCGTTCTGTGCTCTGGACTGCAGAAATGAACACCCTCTCCCCCTGATTCCCTTTCT  
CTTACCCAGGGGAAGTCTCCCTGGAAGAGTTTATAGAGGGCGTCCAGAAGGACCAG  
ATGCTCCTGGACACACTGACACG

>2058

CCCTGCCAGGAGAGTAGTTGAGGGGTGGAGAGGGGCTTGCTTTTCAGTCATTCTCA  
TTCTGTCTCAGGAATGTCCAAGCCTTTGAGTAGGGTAAGCATCATGGCTGGCAGCCT  
CACAGGATTGCTTCTACTTCAGG

>2059

CTCCTAGCAGATGTGTCCATTCTCCATGTCTTCATCAGACCTCACTCTGCTTGTACTCCC  
TCCCTCCAGGTGCCCGCCCTGCATCCCTAAAAGCTTCGGCTACAGCTCGGTGGTGT  
GTGTCTGCAATGCCACATACTG

>2060

ATGGTGTCAGTGATCACCATGGAGTTTCCCGCTGGGTACTGATACCCTTATTCCCTGTG  
GATGTCCTCAGGCCTGCTACTGACCCTGCAGCCAGAACAGAAGTTCAGAAAGTGAA

GGGATTTGGAGGGGCCATGACAGA

>2061

AAGTGATAAGCAGAGTCCCATACTCTCCTATTGACTCGGACTACCATATCTTGATCATCC  
TTTTCTGTAGGAATCGGATATAACATCATCCGGTACCCATGGCCAGCTGTGACTTCTCC  
ATCCGCACCTACACCTATGC

>2062

GTGAGCCACCACCCAGCTGGTCTGGTCCACTTTCTTGGCCGGATCATTGACCTT  
TCTTTGCCAGTTTCTGGATGCCTATGCTGAGCACAAGTTACAGTTCTGGGCAGTGAC  
AGCTGAAAATGAGCCTTCTGCT

>2063

CCTACAACAGGAACTAGAAGTTCCAGAAGCCTGTGTGCAAGGTCCAGGATCAGTTGCT  
CTTCTTTGCAGGTACTGACAGACCCAGAAGCAGCTAAATATGTTTCATGGCATTGCTGT  
ACATTGGTACCTGGACTTTCTGG

>2064

ACCCTTACCTACACTCTCTGGGGACCCCAAGTGGTGGAGCCTTTGTCTTTGCCTTTGT  
CCTTACCCTAGAACCTCCTGTACCATGTGGTTCGGCTGGACCGACTGGAACCTTGCCTTG  
AACCCCGAAGGAGGACCCAATT

>2065

GGTGACTTCTTAGATGAGGGTTTCATGGGAGGTACCCCGAGGGACTCTGACCATCTGT  
TCCCACATTCAGCAAGTTCATTCTCTGAGGGCTCCCAGAGAGTGGGGCTGGTTGCCAGT  
CAGAAGAACGACCTGGACGCAGTG

>2066

CCCTGCCCCGGGAGAGTAGTTGAGGGGTGGAGAGGGACTTGCTTTTCAGTCATTCTCA  
TTCTGTCTCAGGAATGTCCCAAGCCTTCGGGTAGGGTAAGCATCATGGCTGGCAGCC  
TCACAGGATTGCTTCTACTTCAGG

>2067

TCCAAACAGCTGTGTCCGTTCTCCACATCCTTGTGACACCTCACCTCTGCTTGTGCTCC  
CTCCCTCCAGGTGGTGGCCCTGCATCCCTAAAAGCTTCAGTACAGCTCGGTGGTCTGT  
GTCTGCAATGCCACATACTGTG

>2068

GAGGTAAACGGTGTGATGATCACCATGGAGTTTCTCCCTGGGCACTGATAACCCTGT  
GGATGTCCTCAGGCTGCTACTGATCCTGCAGCCAGAAGTTCCAGAAAGTGAAGGGAT  
TTGGAGGGGCCGTGACAGATGCAG

>2069

AAGTGATAAGCAGAGTCCCATACTCTCCTATTGACTCGGACTACCATATCTTGATCATCC  
TTTTCTGTAGGAATCGGATATAACATCATCTGGTACCCATGGCCAGCTGTGACTTCTCC  
ATCCGCACCTACACCTATGC

>2070

CGGATGCACTGGTTGGGCTAGTATGTGTTCCAACCTGCGGTGCTTCTCTTCACTACC  
TTTGTCTCTAGATACCCCTGATTCACCGAGCCCTGCAGTTGGCCAGCGTCCCCTTTCA  
CTCCTTGCCAGCCCCTGGACAT

>2071

ATCAGGCTTCTGTTCTCTCGGTCTGGCCACTTTCTTGGCTGGATCATTGACCTTT  
CTCTTGCCAGGTTCTGGATGCCTATGCTGAGCACAAGTTACAGTTCTGGGCAGTGAC  
AGGTGAAAATGAGCCTTCTGCT

>2072

CCTACAAGAGGAACTAGAAAGTTCCAGAAGCCTGTGGGCAGGGTCCAGGGTACTTGT  
TCTTCCTTTGCAGGTAAGTACAGACCCAGAAGCAGCTAAGTATGTTTCATGGTATTGCTG  
TACATTGGTACCTGGACTTTCTGG

>2073

ACCCTTACCTACTCTCTGGGGACCCCAAGTGTGAGCCTTTGTCTCTTTGCCTTTGT  
CCTTACCCTAGAACCTCCTGTACCATGTGGTCGGCTGGACCGACTGGAACCCATCATTG  
TAGACATCACCAAGCACACGTT

>2074

GGCGACTTCTTAGATGAGGGTTTTTCATGGGAGGTACCCCGAGGGACTCTGACCATCTGT  
TCCCACATTCAGCAAGTTCATTCTGAGGGCTCCCAGAGAGTGGGGCTGGTTGCCAGT  
CAGAAGAACGACCCGGACGCAGTG

>2075

AAGTGGGCTGAAGACAGCGTTGGGGGCCTTGGCAGGATCACACTCTCAGCTTCTCCTC  
CCTGCTCCCTAGCTCCTTAAGGATGTGCCTCTTACCATCAAGGATCCTGCTGTGGGCT  
TCCTGGAGACAATCTCACCTGGC

>2076

CTCCTGGAGCAGGGAGAGTGTGGCCTCTTGCTCTCCGGCTCCCTCTGTTGCCCTCTG  
GTTTCTCCCCAGGCTCCCGACGTCCCTGCTCCTGGCTTTTGGCCTGCTCTGCCTGCC  
TGGCTTCAAGAGGGCAGTGCCTT

>2077

GCTAGGTTCCCAGAAAAGTAAAATGGGAGCAGGTCTCAGCTCAGACCTTGGTGGGCG  
GTCCTTCTCCTAGGAAGAAGCCTATATCCCAAAGGAACAGAAGTATTCTCCTGCAGA  
ACCCCAGACCTCCCTCTGTTTCT

>2078

GCGGGGATGGGGGAGACCTGTAGTCAGAGCCCCGGGCAGCACAGCCAATGCCCGTC  
CTTGCCCCTGCAGAACCTAGAGCTGCTCCGCATCTCCCTGCTGCTCATCCAGTCGTGGC  
TGGAGCCCGTGCAGTTCCTCAGGA

>2079

TGAATGAATGAGAAAAGGGAGGGAACAGTACCCAAGCGCTTGGCCTCTCCTTCTCTCC  
TTCACCTTGCAGAGGCTGGAAGATGGCAGCCCCGGACTGGGCAGATCTTCAAGCAG  
ACCTACAGCAAGTTCGACACAACT

>2080

GCTCCTGGAACAGGGAGAGCGCTGGCCTCTTGCTCTCCAGCTCCCTCTGTTGCCTCCG  
GTTTCTCCCCAGGCTCCCGACGTCCCTGCTCCTGGCTTTTGGCCTGCTCTGCCTGTCC  
TGGCTTCAAGAGGGCAGTGCCTT

>2081

GAGGTTCCCAGAAAAGTAACAATGGGAGCAGGTCTCCAGCATAGACCTTGGTGGGCG  
GTCCTTCTCCTAGGAAGAAGCCTATATCCTGAAGGAGCAGAAGTATTCTCCTGCAGA  
ACCCCAGACCTCCCTCTGCTTCT

>2082

AGGTGGGATGGGGTAGACCTGTGGTCAGAGCCCCGGGCAGCACAGCCACTGCCGGT  
CCTTCCCCTGCAGAACCTAGAGCTGCTCCGCATCTCCCTGCTGCTCATCCAGTCATGGC  
TGGAGCCCGTGCAGCTCCTCAGGA

>2083

TGGATGAATGAGAGAGGGAGGGAACAGTGCCCAAGCGCTTGGCCTCTCCTTCTCTCC  
TTCACCTTGCAGAGGCTGGAAGATGGCAGCCCCGGACTGGGCAGATCTTCAATCAGT

CCTACAGCAAGTTTGACACAAAAT

>2084

TCCCTTGTTTGGTTAGAACGTTTCTCTCCTCCTTGACCCCGGGTTCTAGCTGCCCTTC  
TCTCTGTAGGAGAACGCCAAGAACGAAGAGATTCTGAATCCCTCAAGTACGTCCGG  
CCTGGTGGTGGGTTTCGAGCCCA

>2085

GGGCCCTAGCGGAAGGAAAAAATCATGGTTCATGTGACATGCTGTGTCTTTGTGT  
CTGCCTGTTTCAAGATGGGGAACCCCTCAGCAGCGAGTGACTGGGACCCTGGTCTCTG  
CTGTGTTCTCTGCGGTGCTTGGCT

>2086

GAGGACAGGTGTCTCGGGGTGGTGGAAAGGGGACGGTCTGCAGGAAATCTGTCCTC  
TGCTGTCCCCAGGTGATTGAACAGAGCTACAATGAGACGTGGCTGGGGAGGCAGGG  
GCCTGAGGGACCCAGCTCCATCCCTC

>2087

TGGGGGAAACAGGAAGGGAGCCACTGCTGGGTGCCCTCACCTCACAGCCTCACTCT  
GTCTGCCTGCCAGGAAAAGGGCCATGCTGGTCAACAATGTCCTGGCGGTGCTGGGGG  
GCAGCCTCATGGGCCTGGCCAACGCT

>2088

TGGGCTTTCAGATGGGAATGGACACCTGCCCTCAGCCCTCTTTCTCCCTCGCCAGG  
GCTGACATCAGGGCTGGTGCCATGTACGTGGGGGAGATTGCTCCCACTCACCTGCGG  
GGCGCCCTGGGGACGCTCAACCA

>2089

ATATGGTGGGCTTCCAAGGTAAGGCAGAAGGGCTGAGTGACCTGCCTTCTTCCCAAC  
CTTCTCCACAGGTGCTGGGCTTGGAGTCCCTCCTGGGCACTGCCAGCCTGTGGCCAC  
TGCTCCTGGGCCTCACAGTGCTAC

>2090

GCCTCCGCTCATCTTGCTAGCACCTGGCTTCTCTCAGGTCCCCTCAGGCCTGACCTT  
CCCTTCTCAGGTCTGAAGCGCCTGACAGGCTGGGCCGATGTTTCTGGAGTGCTGGCT  
GAGCTGAAGGATGAGAAGCGGAA

>2091

CCAGCCTGTTGTGGCTGGAGTAGAGGAAGGGGCATTCTGCCATCACTTCTTCTTCC  
CCCACCTCTAGTTTTCTATTATTCGACCAGCATCTTCGAGACAGCAGGGGTAGGCCAG  
CCTGCCTATGCCACCATAGGAG

>2092

CCTACCCACGCGGCCCTCCTACTTCCCGTGCCAAAAGGCTGGGGTCAAGCTCCGA  
CTCTCCCCGAGGTGTTGTTGGTGGAGCGGGCGGGCGCCGACGCTCCATCTCTGG  
GCCTGGCGGGCATGTGTGGCTGTG

>2093

CTGAGTTGAGGGCAAGGGAAGATCAGAAAGGCCTCAACTGGATTCTCCACCCTCCCT  
GTCTGGCCCCTAGGAGCGAGTTCAGCCATGAGCTACGTCTCCATTGTGGCCATCTTTG  
GCTTCGTGGCATTCTTTGAGATTG

>2094

CTGGTTGCCTGAAACTACCCCTCCCTCCCCACCTCACTCCGTCAACACCTCTTTCTCC  
ACCTGTCCCAGGAGGCTATGGGGCCCTACGTCTTCTTCTATTGCGGTCTCCTGCTG  
GGCTTCTCATCTTACCTTCT

>2095

CCGGGTGACATCTGGAAGGCTGAAAGGAAACAAACCCTCCTGATGACCCTATCCCT  
GGCTCCCAACAGCCCCCGAGCTCCCCGCTAACCCAGCCCCAGAGGGGCCAAGTT  
CCCTCGTGTGAAGAACTGGGAGGTG

>2096

TCCCTGCCCCAACTCCCATCCCACCCCTGCACCCTGGCCTGTCTGACCTTTGCACTC  
CCTCGACCCAGGATGGGCCCTGCACCCCAAGACGCTGCCTGGGCTCCCTGGTATTTCC  
ACGGAAACTACAGGGCCGGCCCT

>2097

AGCCTGGAGGAGGGCCTCCCTGTCCCACAACTTCTGCTTGTCCCTTCCCACCCC  
TCTCTCCCCAGGAGCGGCTCCAGGCCACGAACAGCGGCTTCAAGAGGTGGAAGC  
CGAGGTGGCAGCCACAGGCACCTAC

>2098

TCTGGAGCTGATACTCAAGACCCCCGTCTCTCTCCTCACCTCCTCTCCGCTGCCTC  
GGCTGGCTCAGGTGTTTCGATGCCCGGACTGCAGGTCTGCACAGGAAATGTTACCTA  
CATCTGCAACCACATCAAGTATG

>2099

CAGGCCCCAGCCTTCTTCCCCAAGGCAGGGAAGGCGGGGCTCTGACCAGCTCTTCCC  
CATGCGTGCCAGCTCGCCATCACAGTGTCCCGCAGCGCTGCCCTGGCCGAGGAGAC  
TTCCGAATCTGGAACAGCCAGCTG

>2100

GTGGATGGAGGGTCCCTGAGGAGGGCATGAGGCTCAGCCCCAGAACCCCTCTGGC  
CCTCTCCCCACAGCTCTGCATTAGCACGGCTGGACCCAGGAAACGGTCGTTTCGAC  
GTGCTGCCCTGCTGCTGCAGGCC

>2101

GGGGGCCATCCCTGAGCCTCTCAAGAAGGGCCTGCAAGGGGGTGCTGATCCCACACC  
CCAACACCCCCAGGCTGGAGTGGTTTGACGCCCTGGGCTGCGCTGGTACGCCCTCCC  
GGCAGTGTCCAACATGCTGCTGGAA

>2102

AGATAGTCTCCCCACCCACCCCGTGATCACCTCTGTCCCTACCGATGCCACACACC  
TTCTGCCCCAGGATGTGGCTGTCTGCATGGACCTGGATACCCGGACCACCTCGTCCCTG  
TGAAAGACAAGGCAGCAGTGG

>2103

AGTGGTGGAGGAAGAATGGGCGAGGTCTGTGGGTCTGGTTTGAGCCTCTCCCCCTCTC  
TCTCCCTTCCAGCTAGCCAAAGTACCATCGTGGACCACACGCCGCCACGGCCTCTT  
TCATGAAGCACCTGGAGAATGAGC

>2104

AGCAGCCCCTGGGGACCTTAACCTTCTTTTCTTTACCTCCCCTCCCAACCCCATCA  
TCTCTCTGCAGCCAGACCCCTGGAAGGGGAGTGCCGCCAAGGGCACCGGCATCACCA  
GGAAGAAGACCTTTAAAGAAGTGG

>2105

GTTGGACCCTTGCTGGGGAGGCCCTGCCTCTGTGCACCCGGGACACCCTCACACCTT  
CCTCTCCCGCAGCGCCGTGAAGATCTCCGCTCGCTCATGGGCACGGTATGGCGAAG  
CGAGTGAAGGCGACAATCCTGTAT

>2106

GAGGCCAGAGTGAGGAGGGCAGGGCCTCCGGGGGCCACAGCACCCAGGACATCTGT  
CTTCCCACCCACAGGTCTGTGTATGGATGAGTATGACGTGGTGTCCCTCGAACACGA

GACGCTGGTGCTGGTGGTAACCGCA

>2107

GGGCTGGGTCTGGGCTAGCCTGTATCCCCAGGGCCCTGTGACAACCTTGCTTTGTCC  
TCTCTTGCCAGGAGTTATAAGATCCGCTTCAACAGCATCTCCTGCTCAGACCCACTGGT  
GTCCTCTTGCGGGCGGAAGAGG

>2108

ACGGGTGGGCAAGCTGCCTGGGCAAACGTGGCCTGCAAAGGGAGCTCCACTGACGAC  
CCCTGCACCCCAGGTTCTGTGTGTTGCGGCTCGGCTCCCGGCATACCCCCACTTCTGC  
GCCTTTGCTCGTGCGGTGGACACA

>2109

CGCCCAGGCGCCTCACTAGGGCGACCCCTGGTGGCGGGAGGTCCTCAGCCCTCACCG  
GCCTGTCCCGCAGGCCGCTGTGAGACCTTCTGTGTGGGAGAGGATGCCAAGGCCGC  
CGCCCGAGACATCTTCAGCCCCAAC

>2110

ACTAAAGCACTCTGGGGCCAGGCCCTGCTCCCTAGCTCAGGCTGCCTCATTTGCCCT  
CCCCGCCCCAGGTCTGATCCACGTGCACAGGCGGAAGATGTTCCAGGCTACAATCCG  
CTCAGTGGAAAACCTGCAAAGCAG

>2111

TCCTCCTCCACATTCTCCCGCCCCACCCCTCTGACTCCCCATAAGTGCCCCTCTCC  
CCACCCCAGGAGGGCCACCATCCTGGTGCCTGGACACCGGAGGCCAGGAGGGGC  
TGCAGTACCAGCCGGGGGACCAC

>2112

ACAAACATCAGCCCAGGTAAGTGCAGTCTGCTGGGCCCTGCCTCAGAGCTCCCTGTG  
CACTATCCCCAGGTGGCCCTCCCCCGGCTGGGTGCGGGACCCCGGCTGCCCCGTG  
CACGCTGCGCCAGGCTCTACCTT

>2113

GAGGGGTCAAGAAGGGAGGTTACTAGGAAGGGCTATGGGGCCTCCAACCCACTGCAT  
CCTGCCCCGCCAGGATCCCCGACGCTACGAGGAGTGGAAGTGGTTCCGCTGCCCCACG  
CTGCTGGAGGTGCTGGAGCAGTTCC

>2114

GGCCTGGCCACAGCAGGGTTGGGACCGGCCCTCTGCCCCCTCACCGCCTCTCCT  
TCCACCCCCAGATGGGCTGGGCCCTGCACTATGGAGTCTGCTCCACGTGGCTAAG  
CCAGCTCAAGCCCGGAGACCCTGT

>2115

CCACCCTGCATGGTGAGAATGGTGGAGCAGGAAAGGCAAAGGGGACCTGATGGAGTG  
TCTCTCCTGCCAGGGCTCCCTCCTTCCGGCTGCCACCCGATCCCAGCTTGCCCTGCATC  
CTGGTGGGTCCAGGCACTGGCATT

>2116

GGCCTGTGGGGAGGCCCACTAGCACTGTGCCCGGAGAAGAGCCTTCCAAGCGCG  
GGGTTGCTTGCAGGGCTGCAGCCCACTCCCATGACTTTGGTGTTCGGCTGCCGATGCT  
CCCAACTTGACCATCTTACCGCA

>2117

CAGCCAGCAGCCCCGGGCTGCCCCGCGCCACCCCAACAGGGCCCGCCCTAACCC  
CGCCGCCCCGAGACCTACGTGCAGGACATCCTGAGGACGGAGCTGGCTGCGGAGGT  
GCACCGCTGCTGTGCCTCGAGCGGG

>2118



GGGGGCTGGGGCCTGGGGGGATGCTTCCAGGGGATGCAGGGGGATCCACTCAAGGCT  
CCCTTGCCACAGGTCTCATGCCTCTCCTCTTGCTGCTCCTGCTGCCAAGCCCCT  
TACACCCCAACCCATCTGTGAGG

>2119

GGGATGGGGTCTCTGCTAAGGGCCAGGAAGTCCCTTCCCCTTCCAAAAACAACTTA  
CCCAATCCACAGCCGCCCTCACCGCCCGCCTTCTACGGTGTCCAGAGACAGTTAGCC  
AGGCCTGGGCTGGGCACACTCCAC

>2120

CCCAGTGCTTGCCGTCCCTGAGGATCGGTCCAGGCTGCCAGGCCCTCCCTCACAGCCC  
CTCTCTGTCAGCCAGCCTGTCCCATGCCTGCCTGGGGAGCCCTGTTCTGCTCTGGGC  
CACAGCAGAGGCCACCAAGGACT

>2121

GGGGGACGGGGCGTGGCGCTGGCTGGCGTGAGAAGTGCAGGTGCTGATGTCCCTCTGT  
CGGGTTTTGTCAGCGTCGGCGTGTCAAGAACGGCCGCTGGAGATCATCGCCAACGA  
TCAGGGCAACCGCATCACGCCGTCC

>2122

TGGTAGTGGGTCTTTAACTTTGAGATGTCATTGTATCTGTGTCTGAAAACAATAATTC  
TTTAAATAGGTGGTTGAAAAGAAAATAAACCATACATTCAAGTTGATATTGGAGGTG  
GGCAAACAAGACATTTGCTC

>2123

CTGGCCAGACTGTAATTTAAATAAGGGTTAACTATGTGACAATACACTTAATTATCTTT  
ATCCTTTTAGGTTACCCATGCAGTTGTTACTGTACCAGCCTATTTAATGATGCCAACG  
CCAAGCAACCAAAGACGCTG

>2124

ATACGGCATATTTGCCAAATAGTGAAATGTGAAGTACTGACAAAACCTTTCCCTTTTT  
CAATCTAATAGTACGGCAGCTGCTATTGCTTATGGCCTGGATAAGAGGGAGGGGGAGA  
AGAACATCCTGGTGTTTGACCTG

>2125

CTCTGAATTCAGGACATTGCATCTAGATACTTAGATAACAGACATCACAGTAACCATGT  
CTTTTTCTAGGATCTGTTCCGGTCTACTATGAAGCCCGTCCAGAAAGTGTGGAAGAT  
TCTGATTTGAAGAAGTCTGATA

>2126

TTAGAGAGATAAACTTTACATAGCTCATAGGGAGAAGTGAATTTAAAGTTAAATAACT  
TATCCTTACAGGTGACCTGGTACTGCTTCATGTATGTCCCCTTACACTTGGTATTGAAAC  
TGTAGGAGGTGCATGACCAA

>2127

AATGCGGGGATCTAGATGTGCTAATGCTTGTGAGTAACAATAACAAGTTTTTCTGTAT  
GTAACCTTAGGTGAAAGACCCCTGACAAAAGACAATCATCTTCTGGGTACATTTGATC  
TGAAGGAAATTCCTCCTGCTCC

>2128

CTGGTGCAGAGAAAGTCACCAAGTCAGGGACCCTCCATCTCTGACACGACCTGCGGG  
CCATCTTCCAGCTGGCCACGCCATGCGCCTGCTCCTGGAATACAGACTCAAGCT  
ACGAGGAAAAGAAGTATACGATGG

>2129

GCATATGGGAAGGGGATGCTGGGGAGCCTGCTGGCCCAACTGAGCTTCCCCGGTTTC  
CCATCTATCCAGCTGCCCTACTTGATTGATGGGGCTCACAAGATCACCCAGAGCAACGC

CATCCTGTGCTACATTGCCCGCA

>2130

GAAGGTGGCATCCTCCTTGCTGGATTGGGGTGCTATGCTCAGAGTGAGTCTGTGTTTT  
GTGGGTGGCAGGTGGGGAGACAGAAGAGGAGAAGATTCGTGTGGACATTTTGAGAA  
CCAGGCTATGGACGTCTCCAATCA

>2131

AGCCCTGGGGAGGCCACATCTGTGCAGGGAGCTTGTGTCTGAGGGTGGTGACAGCTG  
TTTTCTGCCTCAGGAGAACTGAAGCCAGAATACTTGGAGGAACTCCTACAATGATG  
CAGCACTTCTCACAGTTCCTGGGGA

>2132

GGACTAGAGATTTGCCATACATCCTATGTTACAGAGATTCCAGCCCACACATTCTTG  
GCCTTCTGCAGATCACCTTTGTAGATTCCTCGCCTATGATGTCCTTGACCTCCACCGTA  
TATTTGAGCCAACTGCTTGG

>2133

TGCAGTGGGGTTGTCCCAGCCCTCATGGGCAGCTGACCTTGAGTTCTGGCCTTATTTTC  
CCCCCTCAGGGCTTGGAGAAGATCTCTGCCTACATGAAGTCCAGCCGCTTCCTCCC  
AAAACCTCTGTACACAAGGGTGG

>2134

ACCCCTCCCCGGGTTGCTGCGAGGCGGAGTCGGCCCGTCCCCACATCTCGTACTTCT  
CCCTCCCCGCAGGCCGCTGCGCGGCCCTGCGCATGCTGCTGGCAGATCAGGGCCAGA  
GCTGGAAGGAGGAGGTGGTGACCGT

>2135

GGGGGCTGTGACTAGGATCGGGGACGCCAAGCTCAGTGCCCTCCTGAGCCATGC  
CTCCCCAACAGCTATACGGGCAGCTCCCCAAGTTCCAGGACGGAGACCTCACCTGT  
ACCAGTCCAATACCATCCTGCGTC

>2136

CCCATCCCCAGTGACTGTGTGTTGATCAGGCGCCAGTCACGCGGCCTGCTCCCCTCC  
ACCCAACCCAGGGCTCTATGGGAAGGACCAGCAGGAGGCAGCCCTGGTGGACATGG  
TGAATGACGGCGTGGAGGACCTCCG

>2137

TGGGGCAGACGGGGTGTCTCAGGGGCTGGGAGGGATGAGAGTAGGATGATACATGG  
TGGTGTCTGGCAGGAGGCGGGCAAGGATGACTATGTGAAGGCACTGCCCGGGCAACT  
GAAGCCTTTTGAGACCCTGCTGTCCC

>2138

TTAGGCCCTCTGCCCCAATCCTCCAGCCTGCTCCCGCTGGCTGAGTCCCTAGCCCC  
CTGCCCTGCAGATCTCCTCGCTGACTACAACCTGCTGGACTTGCTGCTGATCCATGAG  
GTCCTAGCCCCTGGCTGCCTGG

>2139

ATGGGCGCGCCGCTTGGTAATTCTATATTCTCCGTTCTCCTCCGCTCGCGGGCGTGTG  
CGCGCCGAGGCTGGCGGTAAGGCTGGAAAGGACTCCGAAAGGCCAAGACAAAGG  
CGTTTCCCGCTCGCAGAGAGCCG

>2140

GCGCATATAATTTCCCATCTCTAGTTCTCATTTTTGTGCATTTATGTTTGTGTATGCTTAA  
AATTTAAGTTCCAGTGGGCCGTATTCATCGACACCTAAAATCTAGGACGACCAAGTCAT  
GGACGTGTGGGCGCGACTG

>2141

GGTTTTATTCTGTTCTCTGAATCTTGGCCAAAGGAAAGTTGGAAGGCAACTGACAGAT  
TCTGCCTTTTAGGTAAGTGAAGTGGCAGGAAATGCATCAAAGACTTAAAGGTAAAGC  
GTATTACCCCTCGTCACTTGCAAC

>2142

CTTTCTTGGTTTCAAATACTGTGATTTTTTAAAAAATCTTAAGTAGAATTAATCCTGTC  
ACTCTCCTAGGTGTCATTCCACACATCCACAAATCTCTGATTGGGAAGAAAGGACAAC  
AGAAGACTGTCTAAAGGATGCC

>2143

TGCGGGGACGCTCTTGGGAGGAGTCTTCTCCCCAGCCTTAGCTGGTTTCATGATTTCTT  
TGCGTCTGTAGGCAACGCGGTAAAAATATTGCTTCGGTGGGTGACGCGGTACAGCTGC  
CCAAGGGCGTTCGTAACGGGAAT

>2144

TCTATAGTTAACGCCGGATCGCAGTTGGAAACCACCAGCTTTTTGTCTAGTATATATTACT  
CATTTTATAGAGCCAGAGGCCAAGAAGAGTAAGACGGCCGCAAAGAAAAATGACAAA  
GAGGCAGCAGGAGAGGGCCAGC

>2145

GCATATAGATTATTCAATAAATGTTCTGCTGAATTGATAATACGTTTTCCACCTTTCTTTT  
CACTTACAGTGGGTAAAGGAAGAAGCCCCAGATATACTGTGCCTTCAAGAGACCAAAT  
GTTTACAGAGAACAACACTACCAG

>2146

TCTGCCCCACCTCTTGATTGCTTTCCCTTTTCTTATAGTTTTTATGCTAATTCTGTTTCAT  
TTCTATAGGCGATGAGGAGCATGATCAGGAAGGCCGGGTGATTGTGGCTGAATTTGAC  
TCGTTTGTGCTGGTAACAGC

>2147

CCCACAGGCCACCCTCAACCGTCCTGGCCCCGGACCCAAACCCACCCCTCACTCTGC  
TTCTCCCCGCAGGATGTTCTGTCTTCCCCACCACCAAGACCTACTTCCCGCACTTCG  
ACCTGAGCCACGGCTCTGCCAG

>2148

CCCACAGGCCACCCTCAACCGTCCTGGCCCCGGACCCAAACCCACCCCTCACTCTGC  
TTCTCCCCGCAGGATGTTCTGTCTTCCCCACCACCAAGACCTACTTCCCGCACTTCG  
ACCTGAGCCACGGCTCTGCCAG

>2149

CAGAGAAGACTCTTGGGTTTCTGATAGGCACTGACTCTCTCTGCCTATTGGTCTATTTTC  
CCACCCTTAGGCTGCTGGTGGTCTACCCCTGGACCCAGAGTTCTTTGAGTCCTTTGGG  
GATCTGTCCACTCCTGATGCT

>2150

CTGGATTATTCTGAGTCCAAGCTAGGCCCTTTTGCTAATCATGTTTCATACCTCTTATCTTC  
CTCCACAGCTCCTGGGCAACGTGCTGGTCTGTGTGCTGGCCATCACTTTGGCAAAG  
AATTCACCCACCAAGTGCAGC

>2151

AAAAGTCCAGGTTGCTTCTCAGGATTTGTGGCACCTTCTGACTGTCAAAGTCTTCTTGT  
CAATCTCACAGGCTCCTGGTTGTCTACCCATGGACCCAGAGGTTCTTTGACAGCTTTGG  
CAACCTGTCTCTGCCTCTGCC

>2152

GCGCCCCGCCCCAGGGGCCCTCCCTCCCCAAGCCCCCGGACGCGCCTCACCCAC  
GTTCTCTCGCAGGACCTTCTGGCTTTCCCCGCCACGAAGACCTACTTCTCCACCTG

GACCTGAGCCCCGGCTCCTCACAA

>2153

CCCCGGCGGGGTGGGTGCGGGGGCGTGCGGGGCGGGTGCAAGCGAGTGAGCCTTG  
AGCGCTCGCCGACAGTCTCTGGCCACTGCCTGCTGGTAACCCCTGCCCCGCACTACCC  
CGGAGACTTCAGCCCCGCGCTGCAGG

>2154

TGATGTCACATGGCTGGATCCAGCTAAAATTCTAAGGCTCTAACTTTTCACATTTGTTCC  
ATGTTACCAGTCATCAGGTGAAAAGCGGAAATGCAACACTGCCACATGTGCAACGCA  
GCGCCTGGCAAATTTTTTAGTT

>2155

TTTTTGAGAAACACTTGTACTGTCATTCTTATTCTCTGCAATTTGCTCTCTCCTTTTGT  
GTGTATGCAGGAAAAGCATCATTACATCGAGAATTTCCATTTTATGGGGACTATGGATC  
AAATTATCTATATGACAATT

>2156

TTTGTGAAGCATTTTTACTGTCATTGCCTCTATTCTCTGCAATTTGCTCTCTCCTTTTGTG  
TGATGCAGGAAAAGCATCATTACATCGAGGCTATAGATCAAATTATCTGTATGACAAT  
TGATATCTTCAGTAATCAC

>2157

CGGGGTGCAGTGGGGACAGGGGTTGCAGTGGAATCTGAGTTCTCCCTCCCTCCATCCT  
GTCCATTCCCAGGAGAACTATGAGCTCTACTCGGTGGAGCTGGGTCTGGCCCTGGCG  
GGGACATGGCTGCCAAGATGAGCA

>2158

GGGGCTTTCCACGGGGTGTGCATGTGGAGGAAAGCCCCAGGACCGCCTCGCCCTGC  
CCCTCTGTCCCAGGGCCTCTCTGCGAGCCTGGCTGCTGAGCTGCTGCTGCGGGATGGG  
CCCAACGCACTGCGGCCACCACGGG

>2159

AGCAGGTCCGTGGCCTCAGGCAGGCAGCTTCCGGCCCCCTCTGAATAACCCACCCCTT  
CCCTGTCCCCAGCTGTACCTGGCAATCGCTCTCATTGCTGTGGTTGTCGTCACCGGCTG  
CTTTGGCTACTACCAGGAATTCA

>2160

TACCTCCCCACATGCAGCAGCTCCCACCCCCACCCCGTCCACCTCAACTTTGGTGCCC  
CTGCCCCGAGCAAGCCACTGTCATCCGCGATGGAGACAAATTCAGATCAACGCTGA  
CCAACTGGTGGTGGGCGACCTGG

>2161

TCAGCTCACACGGCAGTGCACACCCCACTGCCGCCCTATCCCTGAGTCGCGCCTTG  
GCCCCCTGCAGGCACCGCGCAGGGCCTGGTGGTGAACACGGGCGACCGCACCATCA  
TTGGGCGCATCGCATCGCTGGCGTC

>2162

TCTTTGACGCGGGGAAGAGGACTGGAAGCCAGGGTGGGTCCCCAGCCTGCGGTGCTC  
ACCCCTTCCCCAGGTCTGCCTGTCCCTGACAGCCAAGCGCCTGGCCAGTAAGAACTGC  
GTGGTCAAGAACCTGGAGGCGGTGG

>2163

GGAGGAGGGGGCTCGTTCTGGTCCGGGAGAGCCGCCGTGCGGGACCCAGCCTGGAC  
GCCTGGTCTGCAGGGCAGACGTTTGACCAGTCTCTCGGAGACGTGGCGGGCGCTGTGC  
CGGGTGCTCACCTGTGCAACCGCGC

>2164

GGGGGCTCCAGGAATCCCGGGAGGCTGGTGTAGCCGGCTTCGCCCTGACACCGG  
TCCCCGCTCCAGCGCATCGTGATTGGAGACGCATCGGAGACGGCGCTGCTCAAGTTC  
TCGGAGCTGACGCTGGGCAACGCCA

>2165

CCCCGTTCCCTCGTCCACAGCCCCGCCCGTTCCCCGTCCACAGCCTGCCTCTCCCC  
CCCGCCACAGCTGTCCATCCATACGCTGGAGGACCCGCGGGACCCGCGACACTTGCT  
GGTGATGAAGGGCGCCCCGAGC

>2166

ACCCATTTCTGGCCCTGCTAAGAAAGGGTGTGCCAGGGCTTTCCTGACTTCCCC  
GTTTCCGGTCAGGCTTCTGCCAGCTCTACCTGAATGAGAAGGACTACCCGCTGGCTAT  
GCCTTCGACGTAGAGCCATGAA

>2167

TGTCTCCAGGGAGGACAGGGAGATTGGGCTGATCTGAAGGGGTCAGTGATCCACTG  
GTTCCCCCTACAGGTGATCATGGTAACGGGTGACCACCCCATCACCGCCAAGGCCATT  
GCAGCCAGTGTGGGCATCATCTCGG

>2168

CCTCCCCGGGGTTCTCCCCACATCTGGCACAGACCGAGGTCCCAGCGAGGTCCTCCCA  
TCTCTCCCCAGGGATGCCCGTGCCTGTGTGATCAATGGCATGCAGCTGAAGGACATG  
GACCCATCGGAACTGGTCGAGGCC

>2169

ACAGGCGGGGCTGGTCTTGACCGCCTCTCACTGACCACCCACCCACCACCTGCAC  
CCTGCTGCAGGGTGCATTGTGGCCGTCACGGGGATGGTGTGAATGACTCCCCA  
GCTCTGAAGAAGGCAGACATCGGAG

>2170

GAGGGCAGGCAGTGTGGGCACAGGAGGGAGAGGGCTGTGAGGAGGCTGAGGTGCC  
ACCCTACCCACAGGTGCGACTGATCTTCGACAACCTGAAGAAGTCTATTGCCTACACAT  
TGACCAAGAACATCCAGAGCTGAC

>2171

GGGGACCCGAAGTGGAGGGGACAAGGGCCAGCCAAACCCTCAGTCCCAGTTCCTTC  
CACTCCTGGCCAGTTCATCTGTGTCCCTGGCATATGAAAAGGCCGAGAGTGACATCA  
TGCACCTGCGTCCACGCAACCCAA

>2172

GTCCCTCTTCTCTGTGTCCCTGTCTGTGTCCATCTCTGTCTCCCTGTGTGGGGTTGT  
CTCTCCAGGTGCCATTGAGTCTTTGCTGGCTTCACTGACTACTTCACGGCAATGGC  
CCAGGAGGGCTGGTTCCTACT

>2173

TGGGCTGCAGAGGCTCTCCGCCGGGACTCAGGCTGGACTCAGGCTGTTTCCGTTTGCC  
CCTGGCCTGCAGACATTGCGGCAGCGCCTGTACCAGCAGTACACCTGCTACACCGTGT  
TCTTCATCAGCATTGAGGTGTGCC

>2174

GACCCACAGTATCCTGATTTCCATCACGTCCCCAATTCCTAATGGCCTGTCCCATTCTGC  
CCACCCAGGAATAAGATCCTGGTGATCGCCATCGTGTCCAGGTCTGCATCGGCTGC  
TTCCTGTGCTACTGCCCGGC

>2175

GGGGCAAGGACAGGGAGGGGGCTGTAGGGCACAGGCCTGGGATGGCCTTCACCTTGC  
CATGTGCCTTACAGTTCCAGTGGTGGCTGGTCCCCCTGCCCTACGGCATCCTCATCTTC

GTCTATGATGAGATCCGGAAGCTT

>2176

ACCTCTGAGCCCCTGCCCTGCCTAAGTGGCACCCCCAGCACTGAGTCTCCTTTCTCCCT  
CTCTCTCCCAGGCTGGTGGGACCAGGAACCTACTATTAGAGGGACGACTGCCTTCAA  
GCATCCCTGCAACTGCCACAGCA

>2177

CCACCCCGGACACTTCGAGCAGTGGAGGCCTTGTCTCTAACCGGCTGGGCCGGGG  
CTTGTCTGTGCAGGGTCTGGTCGCCAGCAACCTGAATCTCAAACCTGGAGAGTGCCTT  
CGAGTGGCAGGGCAGGTGGCTCCTG

>2178

GTGACAGATTAGTCGGTCAGTGGGGCTGGAGCTGGCCGAGGTGGCCTCATGCCACCC  
GTTACCCCCAGCTTCGTGCTGAACCTGGGCAAAGACAGCAACAACCTGTGCCTGCAC  
TTCAACCCTCGCTTCAACGCCAC

>2179

CACATGAGGAACGGGTTCTGGAAGGGCCCATGGCATGTGGGCCCGGCTCACTGCTCTC  
CTCTACCCCCAGGTGTGCATCACCTTCGACCAGGCCAACCTGACCGTCAAGCTGCCAG  
ATGGATACGAATTCAAGTTCCCA

>2180

GGAAAAAGTAAACAAAATGTAAATAAGGAGTAAAGCATGTACTTAAAATATATTCTTA  
TTCTATCATAGGATAAATCTTCAGACAAAAAAGTGCAAACAAAAGGGAAAAGGGGAG  
CAAAGGGAAAACAGGCCGAAGTGG

>2181

GCGCCCGCCCTGGCAGCTGCGGCGTCCGCGCCGACCTCCGGCTTCCCCTCTCCCCCT  
CGGCCCGTCAAGTGGACGCGGATCTGTCAACATGGGTAAAGGAGACCCCAACAAGC  
CGCGGGGCAAATGTCCTCGTACGC

>2182

ATCTTGTCGTCTTTGGATGTTTATAGGTAACAATTTTGCTGTATTTTGGCTCTATTTTAT  
GTCCACAGACCATGTCTGCAAAGGAGAAGTGAAGTTTGAAGATATGGCAAAAAGTG  
ACAAAGCTCGCTATGACAGGG

>2183

AGTTTAAATAACCCAAATTGCTCCTTGGATTTTCTTCAGTTTATTAACTCTGTTGC  
TTCCTTTCAGATCTGCCTTCTCCTGTTTTGCTCTGAACATCGCCCAAAGATCAAAGT  
GAACACCCTGGCCTATCCATT

>2184

TTTACAATAAGTGGTTTTTACAGTTGAGTAATGATACCGGATGCTTTATTTTTTTGAC  
AATATTTTAGGATATTGCTGCATATCGTGCCAAGGGCAAAGTGAAGCAGGAAAGAAG  
GGCCCTGGCAGGCCAACAGGCT

>2185

CTAAAGAGTCAGGGTCAATTTCTTTCAGACATTCTTGCCACAACAGCATTTTTTTTTCC  
CTCACAATTAGGAACCAACCGGTGAGCCCTCTCCTAAGAGACCCAGGGGAAGACCCA  
AAGGCAGCAAAAACAAGAGTCCCT

>2186

CCTGCGGGGGCGGGGACCCGGGAAAGGCGCGCGGTGGGGGAGGGGGCGCGCAGCT  
GCGGCGAGCGGAGTTGTGACCCGGCGGAGCCCGGAGGAGCCCGGCGCACCTCGC  
GCGGCGGCCGCTCCCGCTGGAGCCGGAG

>2187

CAAAAATGTTTTTCTCTCATTGGGGTAAAACTTTTTCTTCTTTTTTTTTTTCTT  
TTAAATTAGACATGGGAGTCCCACCGTATTGTCCAGGCTGGTCTCGAACTCCTGACCTC  
AAGCAGTCCTCCTGCTTTGG

>2188

TGTGGGTGATGAGGGGGTAGAAAGTGGCTGAAGCGAGATGTTTGTCTAAAAGCACTTT  
TCTGTCTCCAGCATCCCAGCCATCACTCTCCACCTGCTCCTTAGAGAAGGGAAGATG  
AGTGAGTCGAGCTCGAAGTCCAG

>2189

GAGGGCTGTGTCTTCTGAGGGGGTGGAAACAGGTGATGACTGTCCCTGACTACCCCT  
CTGTCTTTACAGAAGGAGCCCAGCGAAGTGCCAACACCTAAGAGACCTCGGGGCCGA  
CCAAAGGGAAGCAAAAACAAGGGTG

>2190

GGCCAGCCTCTGGGGGTGGAAGAGGGGGCCACCGGGCCAGAGCTCACACCAACAAC  
TGCCACCTCACAGGAGAAGGAGGAAGAGGAGGGCATCTCGCAGGAGTCTCGGAG  
GAGGAGCAGTGACCCATGCGTGCCGCT

>2191

CAAGCTTGTCCCCCTGGCGGACTTTGGAAGACAGGAGTTGGTGGCTAAACCGCTGACT  
TTTCTATTGCAGACAACATAGGCGGCCCGAAGGCAAAAGGGCCCGACGGCCTACA  
CGCGTACCAGACCCTGGAGCTGGA

>2192

CACCCCTCTCCAGTCCTGAGGGTCCCCACCAACTCACTCAGCGCCCTCCCTCTCTCC  
CTCCCTGCCAGGAGAGAGCTGCGAGGACAAGAGCCCGCCAGGCCAGCATCCAAGC  
GGGTACGCACGGCATAACGAGCGC

>2193

TTCTCAGGCCCCCTGCTCTGTTTCTCTAGCTCCTCAACTTTTCTTTCCCACTCCAC  
TCCTCCAAGGAAACACGCCCTAACTGCCACCGAATGAAGCCTGCTCTTTAGCGT  
CCTGTGTGAAATCAAGGAGAAA

>2194

AAGCACCAGGAGGACTGAGCACTGGGTATTGGGTCTCTGGTCCCTAAGTCCACTCG  
CCTGCATGCTAGGCCTCAGCATTTCGGAGCTCCAGGAGGAGGAGCCGGTGGACCCAC  
AGCTGATGCGCTTGACAACATGCT

>2195

GAAGGGCTCTTGAGGGGAATCCCATGGTCAAAGGGCTCCTCCTCACCAGCCCACTGG  
CCCCACTACAGGCATGTAATGAGTTCACGACCCATGTCATGAACCTGCTGAGGGAGC  
AGAGCCGCACCAGGCCCGTGGCCC

>2196

GGGTCATGCCATGTGACAGCCCTGCCAGGACATCAACATCCTCCTCACCCTCTTCTCC  
CTCCTCTGTAGACGAAAGCGCCGTAACCTCAGCAAACAGGCCACTGAGGTCTAAATG  
AGTATTTCTACTCCACCTGAGT

>2197

ACTCACATCTTATTAGTGAAGGACTTCAGAGGCAAATGTTTCTACCTGACCCTCCTTT  
CTGCCCCACAGGTCTCAACTGGTTTGGCAACAAGAGGATTCGCTATAAGAAAAACAT  
CGGAAAGTTCCAAGAGGAGGCAA

>2198

AGTTGAGAGTTGTGGTTCATCCTCTACCATCACGGGCTCTATTACACTCTCCCTCTCTG  
CCCCACAAGGCTCTGGCGGCTTTTCAATCTCTCAGGATCTGGAGACATGTTTCTGGG

GATGCCTGGGCTCAACGGAGA

>2199

ACTTTAGGATAACAAGACCTCTTTCCTCTGAGGCTTCTTCTCACTGTCATACCTTCTCTG  
CTGCCCTGCAGGTGGAATCACTCCGACACTCGATGGGGCCAGGGGGCTATGGGGATAAC  
CTCGGGGGAGGCCAGATGTACA

>2200

CTAGTAATGTTGTGCCACACAGGGTCCCAGGGCTTCTCTGTTTTCTGTACTCTGTCT  
CTCCTTTCAGGCAAATGGCAGCTGGCAAGAGGCTGTGACCCCTCTTCAGTGACATCC  
CCAACGGAGGGACCAGGGAGTG

>2201

CACCCACCCTGTCCAAATTTGTTAGCCCTCATTCCTTCTACCCCTCTACCATGGTGC  
TATCTCCAGGGGCGAGTAGGTGCTCAAACATCACAGCCGGATTGGCGAGCCAC  
TGGTGCTGAAGTGAAGGGGGC

>2202

CCCGTCACTCTGCCTCACAGTCCTTCCCAAAGGCCTTGCCTGTTTAGGCCCTGCTTC  
TCAGCTTCTAGAACACAGGCCGGACAGAAGCTTGGAAGTCTGTCTCCCAGGGAG  
GAGGCCCTGGGACAGTGTGGCTC

>2203

GTGTGTGTTGGGTGTGGGTGTGGCATCTCTCATTTTCAAAGATTCTGAGGTCACCAC  
TCTTTCAGGTGGGGACATGTGTGTCAGAGGGAAGCTACCCTGCAGGGACTCTTAG  
CTGGCACTTGGATGGGAAGCCCC

>2204

CAAGCTGCCTTCTCCCTGATCTCACTCCACACCCACCCTGGGATAATTTGTCTTATCCT  
CCCATCATAGGAGTATCTGTGAAGGAACAGACCAGGAGACACCCTGAGACAGGGCTC  
TTCACACTGCAGTCGGAGCTAAT

>2205

AGTCAAGCCCATGGCCACTGGGATCACTCACAAGTGTAAGTCTCCACCTCAAACCCT  
TCCAACTCCAGAGCCTGTGCCTCTGGAGGAGTCCAATTGGTGGTGGAGCCAGAAG  
GTGGAGCAGTAGCTCCTGGTGGAAC

>2206

GGGTATCTGAAGATATGGAGACAAAAAGACAAGGGTTTTGAAATAGTCTCCTCTCCCC  
TTCCCCACCAGGGTGTGCCCTTGCCCCCTCCCCCAGCCCTGTGCTGATCCTCCTGA  
GATAGGGCCTCAGGACCAGGGAA

>2207

GGGATGGTCAACAAGAAAGGAATGGTGAGTGGTGGTGGCTGTGCTCTCAATTTCCCT  
GTCTCCGTACAGGCTCTGTGGGAGGATCAGGGCTGGGAACTCTAGCCCTGGCCCTGGG  
GATCCTGGGAGGCCTGGGGACAGC

>2208

GGCAGCAAGCGAAGAGGGTCTGGGGGGTGAACGACAACGTGCCGATTCCCCCAA  
TCTTCTCCTCAGGAAGGCCCCAGAAAACCAGGAGGAAGAGGAGGAGCGTGCAGAA  
CTGAATCAGTCGGAGGAACCTGAGGCA

>2209

GTGTGGATGCATGCATGTGCTGTGAAGCAGGGAGACTAGCTTCCACTCCTCCTGTCT  
TCTCTGTCAGTGCCCTGGGAGCTGTATTGCCCTCCTGCTCTGGGGACAGCTTTTTGC  
AGTGGACTCAGGCAATGATGTC

>2210



ATCTGACTTTTCACGGTTCCTGACTGGGAACAATTTCCAAATAGCAAACCTCTCTGGCTTCTC  
TCTCTTTGCAGATGACGGCTGCCCGAAGCCCCCGAGATTGCACATGGCTATGTGGAG  
CACTCGGTTTCGCTACCAAGTGTA

>2211

ATGCCTTCTCACTCTGCTCTGGGTGCAGACTTGACTTTTCTTTGGCTCATTCTTGCTT  
TTTGTTCAGGAGTATACACCTTAAATGATAAGAAGCAGTGGATAAATAAGGCTGTTGG  
AGATAAACTTCTGAATGTGA

>2212

ATCTGACTTTTCACGGTTCCTGACTGGGAACAATTTCCAAATAGCAAACCTCTCTGGCTTCTC  
TCTCTTTGCAGATGACGGCTGCCCGAAGCCCCCGAGATTGCACATGGCTATGTGGAG  
CACTCGGTTTCGCTACCAAGTGTA

>2213

ATGCCTTCTCACTCTGCACGGGGTCTAGACTTGACTTCTCCTTTGGCTCACTTCTTGCC  
TTTTGTTTCAGGAGTGTACACCTTAAACAATGAGAAGCAGTGGATAAATAAGGCTGTT  
GGAGATAAACTTCTGAATGTGA

>2214

TTTCACCCCTTCTCAGATGGAAAGGCTCTTGACATTTCCACTCACGAGTGTCTTGCT  
CTCCTTGACAGTATGTGGGAAGCCCAAGAATCCGGCAAACCCAGTGCAGCGGATCTCG  
GGTGGACACCTGGATGCCAAAGG

>2215

AACATCTTAATCCAATCAAATGTTTGTATCCTGTAATGCTCTCATTGAAACAGCTATATTT  
CTTTTTCAGATTAGTGATGATGAACCAGGTTATGACCTTGATTTATTTTGCATACCTAATC  
ATTATGCTGAGGATTTGG

>2216

ACTAAGAGGTGTTTGTATAAAAGTTAATGTATGAAACTTTCTATTAATTCCTGATTTTA  
TTTCTGTAGGACTGAACGCTCTGCTCGAGATGTGATGAAGGAGATGGGAGGCCATCAC  
ATTGTAGCCCTCTGTGTGCTC

>2217

ACATGGGGGTTTTGGTACTTTATATTGTGACTCTGAATTTAAAGCTATGCAATGTCTTCT  
TTTTTGAAAGGATATAATTGACACTGGCAAAACAATGCAGACTTTGCTTTCCTTGGTCA  
GGCAGTATAATCCAAAGATGG

>2218

CACATTTGCCAGTATTAGATTTAAAAGTGATGTTTTCTTTATCTAAATGATGAATTATGAT  
TCTTTTTAGTTGTTGGATTTGAAATCCAGACAAGTTTGTGTAGGATATGCCCTTGACT  
ATAATGAATACTTCAGGGA

>2219

TTGTAAAAAATGGGGTGGAGGAAAATAAGGCATCTGCTGAGTGTATAACCATTTTACCT  
CTTGTTTTTAGCCCTTCTGGGTACGCTAGAATCAGATCTGCTCTCCAGCATCTTCTG  
TTTCCTGGCAAGTGTTCCTG

>2220

TCGCCCTTATCAGAAAACCTCCAGCCAGATCCAGAAATCTTCCAATGACCTGACCTG  
TGTTACACAGAGCTCCAGAACAGGACCAAGCTGACTGTACTTGAAGGAGACATTCT  
GGATGAGCCATTCTGAAAAGAGC

>2221

GGATCTGTGCATGTGGTTGCAGCTCCTTTGGGATATTTCTGACACTGTCATCATGCTCT  
TCGTGGGCAGGTACCCAGCTACTGTTGGAGGCCTGTGTCCAAGCCAGTGTGCCAGTCT

TCATCTACACCAGTAGCATAGA

>2222

TGCACTGGTTGGCTCTGCGGACTCCGCGTCCGTCTGTGACACCCCTGCACACTTACC  
CAATCCTTTTAGATGCCAAGATTTCGATTTTGGACCTGGGGCGGAAAAAGGCAAAAGT  
GGATGAGTTTCCGCTTTGTGGCCA

>2223

TGGAGATAGTCGTGGTGAATGTTTCTATTATCTTCTCTCACTTTGCTGCTTTTCTTCTC  
CCTACCTAGCCCTGGAGGCTGCCGAATTTGTGCCAATAAGTACATGGTAAAAAGTTGT  
GGCAAAGATGGCTTCCATAT

>2224

CTAAGGGACCTTGGAGACAGGCCTTTCAGGTGGATGTTTCATGTTTCTGACCTTGCACTA  
CCCCAATGTAGGCTCCAACAGGCATGCGAGGTGCCTTTGGAAAGCCCCAGGGCACT  
GTGGCCAGGGTTCACATTGGCCAA

>2225

GTAGTGCTGCAGCCCCCTTCTCCACCTTTGCCCCAGCCTCCTGACTCAGTTCTTTCCA  
TTGCTCCTTAGATCCACATCTCAAAGAAGTGGGGCTTACCAAGTTCAATGCTGATGAA  
TTTGAAGACATGGTGGCTGAAA

>2226

ACGCGATGGAATCTCGTGTTCCTCTGTAGACGCTCTGCAAGTTTTAAACCGGCGCG  
GTGTCGTTCCAGATGCCTGAGGAAACCCAGACCCAAGACCAACCGATGGAGGAGGAG  
GAGGTTGAGACGTTTCGCTTTCAGG

>2227

ATCGGATTTTGGTTTCAGTGTGAACTTCTTGGGGGTGCTGTATGCTTAAATTAATATTTT  
TTGTTAACAGGCATTGGACAAAATCCGGTATGAAAGCTTGACAGATCCCAGTAAATTAG  
ACTCTGGGAAAGAGCTGCATA

>2228

GGTGTTAGGCATGGCGTTGAGCACTAAATTGAATGTATTATTAAGTCAATCTTTCTTTCT  
TCTCTTGCAGGTGAACCTATGGGTGCTGGAACAAAAGTTATCCTACACCTGAAAGAAG  
ACCAAAGTACTTGGAGGA

>2229

AATAGTGGTGCAGCGCTGTCGCTTAGTTCTGGAGTGCAGCAGTGATGTGATTTTCGTGTT  
TTCTTTTGAAGGTGGAGAAGGAACGTGATAAAGAAGTAAGCGATGATGAGGCTGAAG  
AAAAGGAAGACAAAGAAGAAGAAA

>2230

TTCTCCACCACCCCAAATATCTTCTATAATGCATTGTTTCATTGGTACTTAGTGATCTGTT  
TTATTACAGCATTTTTTCAGTTGAAGGACAGTTGGAATTCAGAGCCCTTCTATTTGTCCCA  
CGACGTGCTCCTTTTGATC

>2231

TTTGGGAGTTTACATAGTACCAGTTTTTGTCTTGGAAATGACTCAGTGCAATTTGGTTTATA  
TTTTTTTCAGACTTCATTAGAGGGGTGGTAGACTCGGAGGATCTCCCTCTAAACATATC  
CCGTGAGATGTTGCAACAAAG

>2232

ATTGGCCTCTTTAGTTTTTTTTTTTTTTTTTAATTCAGAAAGTCTTTTAAAGAACATACT  
TTGTTTCAGCTTGGAAATACCGAAGACTCTCAAATCGGAAGAAGCTTTCAGAGCTGT  
TAAGGTACTACACATCTGCCT

>2233

GAAAAGTCAGAGCTAGATGAAACCATTCTTAACTGTAAAAGGTCTAAAAGTAACTTT  
GTAATACCTCAGGTGAGACCAAGGACCAGGTAGCTAACTCAGCCTTTGTGGAACGTCT  
TCGGAAACATGGCTTAGAAGTGAT

>2234

GATTTCAATTCACAATGAAAGTTTAGGATTAATCTTTCTAGGTTCTAGTCATCACTTTTT  
GGATTACAGGTGGTTGTGTCAAACCGATTGGTGACATCTCCATGCTGTATTGTCACAAG  
CACATATGGCTGGACAGCAA

>2235

ACCAAGAGTATTACCCTAATAGCTGGCTTTAAGAAATCTTTGTAATATGAGGATTTTATT  
TTGGAAACAGGTATTGATGAAGATGACCCTACTGCTGATGATACCAGTGCTGCTGTAAC  
TGAAGAAATGCCACCCCTTGA

>2236

TGTAGCTTGGGCAACAGAGCAAGAGTCTGTCTTGGAAAGAGCAAAAGTAAGTTGCTG  
TTTGTATTTCCAGGCCTTGGACAAGATTCGCTATGAGAGCCTGACAGACCCCTCGAAGT  
TGGACAGTGGTAAAGAGCTGAAAA

>2237

TCATACTTATCTGTGTTCTTTGGTTTTTTGCTTCTTTAAACTTGTGATTGACTTTAACT  
TGTGGCAGGCTGGTGCAGACATCTCCATGATTGGGCAGTTTGGTGTGGCTTTTATTC  
TGCCTACTTGGTGGCAGAGA

>2238

ACTTACTAATTGCTGGTCTCAACTGCATATACTTTTTACCCTGTTACACGCTTGTAAATTG  
ACTCTTCTAGGTGAGCCATTGGCAGGGGTACCAAAGTGATCCTCCATCTAAAGAAG  
ATCAGACAGAGTACCTAGAAGA

>2239

TTGTCCCTGGCTTTTGCTTTCCCTGGTAGTGTGGTACTCCAAGGCTAACTTCTGTTTT  
TGTTACTTAGTTGGAGAAGGAACGAGAGAAGGAAATTAGTGATGATGAGGCAGAGGA  
AGAGAAAGGTGAGAAAGAAGAGG

>2240

TTAGATAATTTGGTGTGGGGCTAAAAGGTCTCTTTTGAATGTACCACTTATTTTTGG  
TTTCTTTCCAGCACTTTTCTGTAGAAGGTCAGTTGGAATTCAGGGCATTGCTATTTATTC  
TCGTCCGGGCTCCCTTTGACC

>2241

CTGTTTGAATCTGGGGACCAGGTCTGGTCTAGCTGTTTTTACTGAGCTTCTCACCCCTG  
GTTGATGGCAGATTTTATCCGTGGTGTGGTTGACTCTGAGGATCTGCCCTGAACATCT  
CCCGAGAAATGCTCCAGCAGAG

>2242

ATTCCATTCACATTGAAAGTGAAGTTATTGTAGTTAAGCTGGATTGTTTTTCTCTTCCC  
ACCCTTCAAGCTTGAATCCACGAAGACTCCACTAACCGCCGCCCTGTCTGAGCTG  
CTGCGCTATCATACCTCCAGT

>2243

CAATTAGGGCTTCTGGGAACTGGCAGTATGAGGCATTTTAGTCACTGAGTTCATTTAA  
TTACCCTACAGGTGAGAGCAAAGAGCAGGTGGCCAACTCAGCTTTTGTGGAGCGAGT  
GCGGAAACGGGGCTTCGAGGTGGT

>2244

AGGCTTGACAATGCCTGTTTTCTCTTTCAAAGTGGTAATGTCAATCTAAGGCTTTTGTG  
ATCGTCCACAGGTGACAATCTCCAATAGACTTGTGTCTTACCTTGCTGCATTGTGACC

AGCACCTACGGCTGGACAGCCA

>2245

AACTCGTCTCCTCTATGGATTTGACTTAATGCTATTTGGTCAAGTCTCACATGGCTTAAT  
TTTACTTCAGGTATTGATGAAGATGAAGTGGCAGCAGAGGAACCCAATGCTGCAGTTC  
CTGATGAGATCCCCCTCTCGA

>2246

GGCGAACAAGCCGAGGGGCGGAGTGGGCCAGGGATCACCTGCCCCGCAATGACCTGC  
GCCCCGCCCCAGGCCTGCTGGAGCTCTCGCCCGTGGAGCGGGCGTGGTGAGCATC  
TTCGGCGTGGCCAGCCGTTCTTCGT

>2247

CCCCTGGCTTCAGGCTGGGTACCTTGCCCAAGAGGTGCCCCAGCCCTGACACTGCCCT  
GCTTTGCTGCAGCCCTTCTTACCAGATGAGTGACGTTCAAGGAGATTCTCCTTCCAA  
CAACTACAACGCCTACGAGTCCT

>2248

TTTTAAAAATTGTGCTACAGGTGAGAGTTGAGAAATGGATGCAAACCATCGTCTGTG  
TTCTCTTCTAGTGCAGGTACCCTTCTCCAGATGTTGCTTCTCATTTGCGGAGCAAGAG  
ATTCCCCTGAGGGCAATCCTGTG

>2249

GGGGCTTGTCGTTGCCACCCAGTGGTGGCTTGGGTGGCTCAGCCTTCTCTTATTC  
TCTGTTACAGATTCAAGCTGAAGAGAGGCAAAGAGGCCTGCGCCTTGGACACAGTT  
GGATGGGTTACAGAGGCACAGAAA

>2250

TTAAGATTTTTACAAGACTGTGATAGATATTGATGACTCTCATGTGTTTGTCTCTTGG  
GCGTTTTAAGGAAATGCTAGTGAGTCGGAGGAAGACCCGAGCGCCGGCAGTGTGGAG  
AGCCCGTCCGTCTCCAGCACGCA

>2251

AAGATTTTTAAAGCACACATTCTAGAGTAAAACTGTGACTCTGTTGCTCTGGTCCTC  
CTGATCCCCAGGGTCCCTGCCGTAGAGAAATGGAAGACACACTGAATCACCTGAAGTT  
CCTCAATGTGCTGAGTCCCAGGG

>2252

CGCCCTGGCCACCGACCTGACACCAGACCCAGGAGCATTCACTTCTCTGTCTTCTGTT  
TCTCTCCACAGTGTGCGCCTTCCAAAGGCAGGAAGCGGGGCTTCTGCTGGTGTGTGG  
ATAAGTATGGGCAGCCTCTCCAG

>2253

CTCAGACTCAGCCCCAAAGTCTGTGGTCTCTGACCTGACACAGCCTTATGTGTATGTGT  
GTATTGTTACAGGAGGAGATGATCTTCCAGATCCCATGGAAGCATGCTGCCAAGCATGGC  
TGGGACATCAACAAGGATGCCT

>2254

CTTCAGCCAGGGGAGCTGAGGATCCCTACCCATGGCCCTGACGATCCTTTTTTTCTC  
CTGCCCTCTAGGCCGATACAAAGCAGGGGAAAAGGAGCCAGATCCAAGACGTGGAA  
GGCCAACCTTCGCTGTGCCATGAA

>2255

TGTGGGCCAGGGTGAGCAGTGAAGAAATGCTAAGGTGGCCTGGGCCTAAGCTGCTT  
TCTCCCTCGACAGTCATGTGGGGATTCCAGCCCTGATACCTTCTCTGATGGACTCAGCA  
GCTCCACTCTGCCTGATGACCACA

>2256

GGAGGGCGCTCGATGTCTTGCAAATAAGAAAGCACACAACCTTGACCTGTGGCTTCT  
GCTGTTCCCCAGCACTGTGCCATGTGCTGTCAGCAGCACTCTCCCCGACTGGCACAT  
CCCAGTGGAAGTTGTGCCGGACAG

>2257

ATTGAGGCAGGGCCACAGGGTGAGTCTGCACTGGAAGGGAGTTGATAGCCTCTTGCTC  
TTCTGTCCCCAGCTCTTGAGCAGTCGGAGTGGCAGCCAACAAACGTGGATGGGAAG  
GGGTACCTACTCAATGAACCTGGAG

>2258

CAGGGGTAGGGGGAAGCACACCTGATGCCACCGTCCCCTACCCTCATAACAACCTTCTT  
CACATCTTAGGGGATATTGGGCTGAGTCTACAGCGTGTCTTACAGATCTGAAGAAC  
ATGGATGCCACCTGGCTGGACAG

>2259

TTAAGCCTAGACAGTTTTCAATGACTTTTTTCTCTACATGTCTTTTCATTTTTATC  
TTCTTGAAGTCCCTCAGAAACCTAAGGTCTCCTTGAACCCTCCATGGAATAGAATATT  
AAAGGAGAGAATGTGACTCT

>2260

TCTCTTTCTCTATTCTCTCTCTCTCTTATTATTGTTAAATAAATAATGTAATGAATG  
TTCTTCACTGGCTGCTCCTTCAAGCCTCTGCTGAGGTGGTATGGAGGGCCAGCCC  
CTCTTCTCAGGTGCCATGG

>2261

AAACTCTGAACCTCATTTTTAGTTCCCAAGATGAATTATGTTTCTCATTGCATCTGTGT  
TCCACTACAGCTCCGCGTGAGAAGTACTGGCTACAATTTTTATCCATTGTTGGTGGT  
GATTCTGTTTGCTGTGGACAC

>2262

GATCTCTGGGGGCCGAAAGGGGCAGATGCTTTGGGAGGGCTCATGGGGTCTGCAATG  
TTTCCTTTCCAGAGGCAGGGAGCCCTGAAAGCCCAGAGAGCACGGAGATAACTGAGG  
AGGAGCTCCTGGATAATTTCCATCT

>2263

ATCTCCTGGGGGCCGAAAGGGGCAGATGCTTTGGGAGGGCTCATGGGGTCTGCAATG  
TTTCCTTTCCAGAGGCAGGGAGCCCTGAAAGCCCAGAGAGCACGGAGATAACTGAGG  
AGGAGCTCCTGGATAATTTCCATCT

>2264

ATCAGTCATTGTCTAGGCTGATAATCACTGTGTCTTGTAGATATGCTAATGTCAAGTTA  
TTCTTAGGAGCCCTGCCAATAGAATCTACAGAGTCGTAGAGAGTTTAGCCAAGG  
CACAGGAGACATCAGGAGAAG

>2265

GCCAGCTATGGCTCTACTTCCCTGTCAGCTTGTCTGCTGCTCTTGACCTTGGTCTT  
GTCTTTGAGTGTGAGACATCCATGGATGGAGAGGGCGGACTCTGCTGGTGCCTCTAC  
CCTTGAATGGGAAGAGGATCC

>2266

CTCTCTGATGTCAAAGCATGGTTCCTGGCAGGACCACCTCACCAGGCTCCCTCCCTCG  
CTCTCTCCGAGTGTCTTCCAGGACCTGGACCTCTGCCCTCTGGATGGCGGCATCCA  
GCTACGAATCTCCGACCACCACT

>2267

TTTGCCGCTCGCCTCACGAGGCCTGCCCTTCTGATTTTATACCTAAACAACATGTGCT  
CCACATTTCAGAACCTATCTTCTCGACACATGGGATAACGAGGCTTATGTGCACGATG

CACCTGTACGATCACTGAACTG

>2268

ATGGGGCCTAGGGGTGGGGTGACCCTGCACTGCTGTGTCCCTAACCAAGACCCCC  
TTCTTTCTTCAGTGGTGTCTCCATGTCTTTGTACAAGGAGAAGAAAGTAATGACAAA  
ATACCTGTGGCCTTGGGCCTCAA

>2269

CCAAAGAACATCTTCCCATAGCATCTTTGTCCCTTGCCCCACAAAATTCTTCTTCTC  
TTTCGTGCAGAGTGTAGATCCCAAAAATTACCCAAAGAAGAAGATGGAAAAGCGATTT  
GTCTTCAACAAGATAGAAATCA

>2270

AAATAAATTGGAAATTAATTTCTGATTCTGACCTCTATGTAACTGAGCTGATGATAATT  
ATTATTCTAGGCCACAGAACTGAAACATCTTCAGTGTCTAGAAGAAGAAGCTCAAACCT  
CTGGAGGAAGTGCTAAATTTAG

>2271

TCAATTGGGAATAACTGTATATAAGGTAACTACTCTGTACTTTAAAAAATTAACATTTT  
TCTTTTATAGGGATCTGAAACAACATTCATGTGTGAATATGCTGATGAGACAGCAACCA  
TTGTAGAATTTCTGAACAGAT

>2272

CGTGCTTGGCCTCCTCCTTCTGACCATCATTCTCTTTCCCTCCCTGCCTTCATTTTCTCC  
CCAATCTAGATTTCTTCTGACCACTATGCCACTGACTCCCTCAGTGTTTCCACTCTGC  
CCCTCCCAGAGGTTTCAGTG

>2273

TAGGCTCTGGATATCTGCAGTACCCAGATTGGCCCCACTGTTCTCTTCTTCCAACCTT  
TCTCTCTAGGTACAAGAAGCTCGGATAATGATAAAGTCCAGAAGTGCAGCCACTATCTA  
TTCTCTGAAGAAATCACTTCT

>2274

GGGGCACTACCTTCAGGATCCTGACTTGTCTAGGCCAGGGGAATGACCACATATGCAC  
ACATATCTCCAGTGATCCCCTGGGCTCCAGAGAACCTAACACTTCACAAACTGAGTGA  
ATCCCAGCTAGAAGTGAAGTGGAA

>2275

TTCAGGAGTATGTTTTAATTCTCCCTTCTCTCATAGACACCCACTTTCCCTCATCCTCTT  
CTCCTCAAGGAACAATCAGTGGATTATAGACATAAGTTCTCCTTGCTAGTGTGGATGG  
GCAGAAACGCTACACGTTTC

>2276

GCAACAGTGCCTGGCATGTAGTAGGGGCACAACAAATATAAGGTCCACTTTGCTTTTCT  
TTTTTCTATAGAGAATCCTTTCTGTTTGCATTGGAAGCCGTGTTATCTCTGTTGGCTC  
CATGGGATTGATTATCAGCCT

>2277

GACAACTGGGAGAAGGGTGATAAAAAGCTTTAACCTATGTGCTCCTGCTCCCTCTTT  
CTCCCTGTCAGGACGATGCCCCGAATTCCCACCCTGAAGAACCTAGAGGATCTTGTT  
ACTGAATACCACGGGAACCTTTTCG

>2278

TTTGGCACAGAGCTCGGTCTTTTACTTCTGCCCCTAATTGACCCCTGACCTGGACATA  
TCTGTCTTTAGGCCTGGAGTGGTGTGTCTAAGGGACTGGCTGAGAGTCTGCAGCCAGA  
CTACAGTGAACGACTCTGCCTCG

>2279

GAGGAAAAATCTCTCTCCATCCTCCAAATGGAGCTGGCACATTGCTATCTGTGGCATT  
TGTCCTTTCCAGAACACAACCTGAGAAGGAAACCTTCTGCAGGGCTGCGACTGTGCTCC  
GGCAGTTCTACAGCCACCATGAGA

>2280

CTTGATCAAGTAGACAGGCAGGCAAGACAAATGCTTACCAATGCAAGCTAATGAAATG  
TTTCTTTTGCAGAATTCTGTCTGTGAAGGAAGCCAACCAGAGTACGTTGGAAAAC  
TCTTGGAAAGGCTAAAGACGATCA

>2281

GAATGGACAATGGACCAAATTTTTATACCTTGTCTTGATTATTTGCATTTTAAAAATTTTC  
CTCATTTAGCACCAACTGTGCACTGAAGAAATCTTTCAGGGAATAGGCACACTGGAGA  
GTCAAACCTGTGCAAGGGGGTA

>2282

CTGGCTGTGCCTATTTCTATGGAATTGACAGTTTCTGTAACTATTGTCATTTTTCTT  
TTTTACAGAAAAAGTGTGGAGAAGAAAGACGGAGAGTAAACCAATCCTAGACTAC  
CTGCAAGAGTTTCTTGGTGTA

>2283

TAGAAGGAAGTAGCTGGCAGAGCTGTGCCTGTTGATAAAATCAATCCTTAATCACTTTT  
TCCCCAACAGGTGCAGTTTTGCCAAGGAGTGCTAAAGAACTTAGATGTCAGTGCATA  
AAGACATACTCCAAACCTTTCCA

>2284

GACTTTTCAAGAACCCTACTTTCCTTCTATTAAACATAGCTCATCTTTATATTTTAATT  
TTATTTTAGGGCTGAGAATTCATAAAAAATTCATTCTCTGTGGTATCCAAGAATCAGTG  
AAGATGCCAGTGAAACTTC

>2285

TGCTCTTTGTGATATATTTCCAAAGCTGCCTCAGAATATTTCTTTGAATAAATCCTTACT  
ATTTACCAGGACAACCTGCACCAGACCATGCTTCAGTGAGAGACTGTCTCAGATGACCA  
ATACCACCATGCAAACAAGAT

>2286

TAGGCTTCTGGGGCTGCTTGGCTCTACATCATTTGAGTCACTCTGCCTTATCAACTTTC  
ATCCCCACAGTATTTTCTGTGAACAGCCATGCAACCAAACACGGCAGGCAACGCG  
CTGACATTTCTGAAGAGTCTTC

>2287

CAGAGCTCTCACGCTACAGCTGACAGGCAGGGCAGGCGTTTTAATTATTATTAATTTTT  
TTTTGAGACAGAGTTTGTGACAGTATCAAGAGTGGGTATCCTCTCAGCGTGTCTTCAA  
GTAGCATCCCAGAGCCCCGCTCC

>2288

GGGCAGCAGTTGTCCATTCTGGGGCCTGGGTCAGCTCTCAGCTGTGGCCGTTGTGCCT  
GTGCTTCCCCAGGTCTGGTGGTGAAGTCCAACCTGCCCTCACATATCCAAGAGCAG  
GCTGACTGCCTTCCCCATTCCCAC

>2289

AGCAATTCATGGGGAGCACCCCTCCAGAGAGGGATGATTTGCACAGGGCCCTCAGCCC  
AGTCCCTTGAGGCTGGACCTTGAGAGTGAGGCCCTGAGGCGAGACATGGGCACCT  
GGCTCCTGGCCTGCATCTGCATCTG

>2290

CTCCCCAACCCCGAGCTCAGCTCTGGCCTGAAGTACTTACCGTGGGCTCCTGATGGT  
CACTGTCTCCAGGGCCAAGGTCTAGAACCTTACCTGCCTCACCAACAACATTCTCAG

GATCGATTGCCACTGGTCTGCCCC

>2291

TCCCAGGATTGAAGCAGCTATGCCAGGACAGTGTAGCAGCCCCGTGGTGCTGACAAA  
TGCCCTTTCCAGCAACCAGGCTCCTGGCGGCACACATAAGTGCATCTTGCGGGGCAGT  
GAGTGCACCGTCGTGCTGCCACCT

>2292

TCTTGTGTGTTCTGACTGACACACCCAGACCCATGGGGCTTCAGCCTCACATGGATTCA  
CTCTGTTCCAGTTAAGCTGGACCCGCCCTGACTTGCAGAGCAACATCAGTTCTGGC  
CACTGCATCCTGACCTGGAGCAT

>2293

GTGTGTATTCTCGAGGGCTGAGGGACCCAGCCCCACCTTCACCACCTGCTAACTGTCC  
CCACCCCAACAGCAGGCCAGCACAGGGATCACATTGTCGGGGTGACCTGGCTTATAC  
TTGAAGCCTTTGAGCTGGACCCTG

>2294

GCCAGGTGGGTTTGGGGGGAGCCTCCTGGCACTGAGGCTGCTCACAGCCCTGGGCCC  
TTCTGTCCACAGGCCCTCTGATCCCACCCTGGGGGTGGCCAGGCAACACCCTTGTTG  
CTGTGTCCATCTTCTCCTGCTGAC

>2295

CTCAGCCTCTGCAGTGACCTCAGGCCACCTGGGTGCCATAGGCCTCTGACTGGCCTC  
TCTTGGCCTCAGGGTGAAGAGAATCTTCTACCAGAACGTGCCCTCTCCAGCGATGTT  
TTCCAGCCCCTCTACAGTGTACAC

>2296

GGCAGCTGCTCCAGGATGAGTTCTGAACATGCTACCTGAGCCCTTCCCTCCTCCCGTG  
CTCTGTTCCAGACTTGGATGGGGGCCACGGGGCCGGTGTGCTGTTGAGCCAGGACTG  
TGCTGGCACCCACAGGGAGCCT

>2297

GTGGGGGACTCAGTAACACCTTGAGGTGAAGGGATGCTTCCACACTGGTTGACGT  
TTGTCTCCTCAGGACCTGACTTCTGCTCTGACCAAGAAAATCACTCTTAAGACCCACT  
GGTTTCTCCTCCCATGGACACAG

>2298

CATCGCCTTTCCCAAAGGCATTCACTCCTGCTTCTTGTCACTTAGTAGTAGTCTCTTTT  
TATCCTGTAGCTTACAGGCGGTATTGGCTTCATCCACCACAACTGTACACCTGAATTCC  
AGGCCAATGAAGTTCGAAAAG

>2299

ATGCTTCAGATCAAGAGCCTGATGAAAGTAGTTCAAAGATGCGATGCCCTTCTCACCA  
TCCCTTTCCAGAAATATGAACAGGGATTATCACAGACCCTGTGGTCTCAGCCCCAA  
GGATCGCGTGCGGGATGTTTTTG

>2300

GAAGGAAAGAAAAGAGTTAACTGGTCATAGTCGATGACTGGCCCTTCTCACATCTCA  
CCTCCCACGTAGATAATGACAAAGAGGGAAAGACTTGGTGGTAGCCCCTGCAGGCATCA  
CACTGAAGGAGGCAAATGAAATTC

>2301

AGTCCTAGAGCTGGGAAAGGGCCTGGAACCTAATGCCTAGGGTCTGATTCATGTCCTG  
CCCTGACCACAGGAAAGTTGCCATTGTAAATGAAGATGATGAGCTTGTGGCCATCATT  
GCCCCGACAGACCTGAAGAAGAA

>2302



GCTACACAGGTGGGTTGGGGCAATAGGGGCAGCTGCCACATGACAGTCTGAGACTTAC  
TTCTTGTCTAGACTCTTCCCAGGGAAATTCCATCTTCCAGATCAATATGATCAAGTACA  
TCAAAGACAAATACCCTAATCT

>2303

GTGGTGGGAGTGGGTAAGCTGGGCTCCACCTTAACCTTCACATGAGCATTTCCTTTC  
CTTCACCATAGTGGTCACTGCTGCCAGGCCAAGAACCTCATTGATGCAGGTGTGGAT  
GCCCTGCGGGTGGGCATGGGAAG

>2304

AATATGGCCACAGGGTCCACTGCCCGTCCCCATTAACCCTATCCACCCATGTGTTCTC  
CATCTCAACAGTGTGGCCTGTGGGCGGCCCAAGCAACAGCAGTGTACAAGGTGTC  
AGAGTATGCACGGCGCTTTGGTGT

>2305

CCACCCTAATCCTGCACTGACAGTCTCATCTCTGCTGTGACCTTGCCCGTGTCTCTGCC  
TCTCCCTGCAGTGAAGCTGACAAAATCAAAGTGGCCAGGGAGTGTCTGGTGTGTG  
CAGGACAAAGGGTCAATCCACAAA

>2306

GGAGCTGGGACATGGGTAGAGGGGCTGGTCCAGGGCCAGCTACCCACATTTGACCTCT  
GCCCTTCTTCAGAGCCATGATGTACTCTGGGGAGCTTAAGTTTGAGAAGAGAAGTCC  
TCAGCCCAGGTGGAAGGTGGCGTC

>2307

TCAGCCACAGTGAAGTGCCTGTGAGTGCATGAACTGATGGGGGCGCTGCCTGTTTTTC  
TCCTGTGTGCAGACCGTTGGGGGGGTGAATTACTTCTTCGACGTAGAGGTGGGCCGAA  
CCATATGTACCAAGTCCCAGCCCA

>2308

TCTCATGCCTGGGCATCTTCCCCTTAACTGTAACCCACACTGATTGGCCCTCTCTTTC  
CCTTTACAGAAACAGTTGTGCTCTTTCGAGATCTACGAAGTTCCTGGGAGAACAGA  
AGGTCCCTGGTGAAATCCAGGT

>2309

ACAGTAGCATCGCCTCCCTCTGAGTTCTTCTCCAGCCCAACTTGACACCTGTGCCT  
TCCATGAACAGCCAGAAGTGCAGAAGAAACAGTTGTGCTCTTTCGAGATCTACGAAGT  
TCCCTGGGAGGACAGAATGTCCC

>2310

ACTGTGTCTCCTGTGTCCCTCTGCCTCGCCGCTGTCCGGAACCTGCTCTGCGCGGCA  
CGTCTGGCAGTGGGGCAGGTGGAGCTGGGCGGGGGCCCTGGTGCAGGCAGCCTGCA  
GCCCTTGGCCCTGGAGGGGTCCCT

>2311

GCGCTGCTTTCTGGGCTCTAAACTGGCTGCTCCTCCTGACACTGAGTAGGACCTC  
CAACTCTTACAGATCCCTTCCCCTGAAGTATTTGAAGAGCTGATCAAGTTTTCTTCCA  
CACTAACGTGCTTGAGGACAACA

>2312

CTCCCCGAGGGGCACACAGGGCCTCACTGTGAGCTCAGCCCCTGAACAGGCTCTGCT  
TCCCATCCTCAGGTTCAACATCGGTGGCCCCACATCCTCCATTCCCATCTTGTGCTCCT  
ACTTCTTTGATGAAGGCCCTCCA

>2313

CAGGATAGAGAAGACAGGTGCTCCAGGGTCTGACATGACCCCCATCCTGAAGGGCCT  
TATGTCTTCCAGGTGAACGCTATGGCTCCAAGAAGAGCATGGTCATTCTGACCAGCAG

TGTGACGGCCGGCACCGCGGAGGA

>2314

CCCTCTCCTAGCCTTGTCCCTGGCCTCTCCTGCCAACCCCTGCCCTTCCTGACCCAGCAC  
CGCCTCTGCAGGTGCTGCGCCCCGATTACGTCCCGGATTGTGGGAGGCTGGGAGTGT  
GAGCAGCATTCCCAGCCCTGGCA

>2315

CCATGCTCCCCTGCCCCATCCCCTTTTCCCCTTCCCGTCTTCTCATCCCTCCATTCCCATC  
TTTCCCAGCAATTACCAGCTCTGGCTGGGTCGCCACAACCTGTTTGACGACGAAAAC  
ACAGCCCAGTTTGTTTCATGTC

>2316

CGTCCAAGGGAGAAAGGGCCAGGGAAGCAGGTGAGGTCGGGCTGCAGCCCTTTTCT  
CCCGGGTTCGTAGTCTCATTCCAGATGATCTCCAGTGTGTGGACCTCAAATCCTGCC  
TAATGATGAGTGCAAAAAGCCCA

>2317

TGGGGCTCCCCAGGCAGAACTGGGGCCCCGTAGACCTTCTCACTCTCCCCTCCCACC  
TTGTGCTCCCAGGGTGATTCAGGGGGCCCCGTGATGTGTGATGGTGTGCTCCAAGGTG  
TCACATCATGGGGCTACGTCCCTT

>2318

CACAGCTCAGTCCCTCCCCTATCCAATTCTTTGGGTCTGATCCCCCTGACCCAGCAC  
CCCCTCCGAGGTGCCGTGCCCTCATCCAGTCTCGGATTGTGGGAGGCTGGGAGTGT  
GAGAAGCATTCCAACCCTGGCA

>2319

TATCCTCCCCTGCCCCATCTACCTTTCCCATTCTCTCTCCTCATGCATCCACCCCTT  
CCTCCCAGGAATAGCCAGGTCTGGCTGGGTCGGCACAACCTGTTTGAGCCTGAAGAC  
ACAGGCCAGAGGGTCCCTGTC

>2320

GGTCTGAGGGAAGTGGGGCCAAAGAACCAGGTGGGGTCCGGCCACAGCCCAGTTTTT  
CTCTGACCCATAGTCTTGCGCCCCAGGAGTCTTCAGTGTGTGAGCCTCCATCTCCTGTC  
CAATGACATGTGTGCTAGAGCTTA

>2321

AGAGATGGAGTTGCCTAGGCAGTTATTGGGGCCAATCTTCTCACTGTGTCTCTCCTCC  
TTTACCCTTAGGGTGATTCTGGGGGTCCAATTGTCTGTAATGGGGTGCTTCAAGGTATC  
ACATCATGGGGCCCTGAGCCAT

>2322

CATTCCCTGGCTGGAGGACTAGCTCTGTGGCCTGCAGATGCCTGTACCTTCTTTTCAT  
CTTCCCTCAGCCCTGTGGGAGAAACCATTCAATTCCTCAAGGACCACTCCCAAAGAC  
TTCTATGTTGATGAGAACACAAC

>2323

GGAGGGCTCTGCCAGCAGGGATCCTGGCTTGTTCAATTAATCTAATGTTCTAACTCAAT  
GCCCCTTCAGGAATTTTACAAGAAGCTAGAGTTGCATCTTCCAAGTTCTCCATTC  
TGGCTCCTATGTATTAGATCAG

>2324

GGCTCTCGCAGTCTTGTCCAGGCCCTCTCTTGCTGGCTTGAGATAATGCTTGTGAT  
TTTCTCCAGAGTTTCCACAAGGCCACCTTGACGTGGATGAGGCTGGCACCGAGGC  
TGCAGCAGCCACCACGTTTCGCGA

>2325

TGTAGGCTACAGTGAAGTCCAGCTTGTGAAGTCCATTTGACAAATTACCTGTGCCTTTT  
CCATCCTGCAGATTCTCACAGCCACAGTGGACAATGCCAATGTCCTTCTGCAGATTGAC  
AATGCCCGTCTGGCCGCGGATG

>2326

GGAGAAGAGAACAAGCCCTCGCTGTGATCAGGATGGGTGTCTCATACTTTTCTCTG  
GGGTCATTCCAGGTATGAGACAGAGTTGAACCTGCGCATGAGTGTGGAAGCCGACATC  
AATGGCCTGCGCAGGGTGTCTGGAC

>2327

TTCAGGCCTAAGGAACACCAATCCGCTGCCATGGTGGAACTCCTGACTGTGGACTGTC  
CCTGGCTTGAGGAGATGAATGCCCTGAGAGGCCAGGTGGGTGGAGATGTCAATGTG  
GAGATGGACGCTGCACCTGGCGTGG

>2328

GAGGTGGAAGGAACCCAGACCACCTGCCTTCTGGGGCCTTCTGGTGTGAATGGCATT  
TCTTTTTTGAGACAGAGGAGCTGAACCGGAGGTGGCCACCAACAGCGAGCTGGTG  
CAGAGCGGCAAGAGCGAGATCTCGG

>2329

GTGCACCCAGGACTGGCAGGGAGAGAACGGCCACACTACTAATCGTTGATTCCCTTC  
CCTCCCTCACAGAAAGCATCCCTGGAGAACAGCCTGGAGGAGACCAAAGGTCGCTAC  
TGCATGCAGCTGGCCAGATCCAGG

>2330

GCCTCCTTACTCCTGATTAGTCCATTGTCTGTCCACCTCTGGTAACGTCTCTTCCCACC  
TCTTCCCAGTGACCTCCTCAGCCGCCAAATCCGCACCAAGGTCATGGATGTGCACG  
ATGGCAAGGTGGTGTCCACCCA

>2331

TGGGGCACGGTTCTCCATGGCTATGAGACTCCATTTATGCATCAGGAGTAAAGGGGTCT  
TGTGTTTTTAGGTGAGGTTCTGGAGCAGCAGAACCAGGTAAGTCAAACAAAATGGG  
AGCTGCTGCAGCAGGTAGATACCT

>2332

TCCCTCACAGGTAATGAGAGGGACCTGCCCTGGAGAGAACGTGCCTTCATGATGTCCC  
TTGTTCTCTAGGATGTGGATGGTCTTATATGACCAAGGTGGACCTCAGGCCAAACT  
TGACAACTTGCAGCAGGAAATTG

>2333

GACTGCTTCTGTCTAAGTTGTTTTGTTTTAGTGCTGTAAGAGTCACTAACCTATTAT  
TGCTTGCAGGAGTTGTCTCAGATGCAGACTCAAATCAGTGAAACTAATGTCATCCTCT  
CTATGGACAACAACCGCAGTC

>2334

TCTCATGTATGTGTGCCTGTGCCATGCTGAGTTCTGCCTACATTTAACAACGCTATCTA  
CCATCTTTAGTATGAAGAGCTGCAGATCACTGCTGGCAGACATGGGGATAGTGTGAGA  
AATTCAAAGATAGAAATTTCTG

>2335

GGGGAGACCAATTGGGATGGAGGCCTAGTGGGGAATGCATATTATGAGAGGGTGTCTAT  
ATTCTTTTTCAGATCTCAAATTGCAGCAGTCCATCAGTGATGCAGAGCAGCGTGGCG  
AGAATGCCCTCAAGGATGCCAAGA

>2336

GGGGCATGTGCAGGCTTTGTTGGGCTGGAAACGGAGTTGAGGTTGAAAATAACTGAG  
CTTCTCTTGCAGCTGTGAGCACAAGCCACACCACCATCAGTGGAGGTGGCAGCCGA

GGAGGTGGCGGCGGTGGCTACGGCTC

>2337

ATATTACATGAAGGTTTTATTTTTCTTTTTGTCTCGACATCATTAAAAATGACTTTTTATT  
TTATATAGATTTAAAAACCATTCATACTTCAACGGGAAAAAATCTTCTAGTTTCTGGATG  
GTGGGGCTTTGTTCGCCA

>2338

GGAAAGCAGGAAAAAATACATTGTAGTGATAATAAAAAATCTAATACTGTGTACTATTA  
TTATCCACAGGTTTAAACCATTCCTGCCTATTTCTACATAATTTATTTACCATGTTGC  
TTGTCCACCGAGAAGCTCG

>2339

CTCTCAAGCTCTATAGGTTTGAGCTGTGGAACAGTCCCAGTCCCCAAATGGGGATCTTG  
TTTTGTTTCAGACTTTGGAGAAGATTGAAGACATGGCTGTGTCCCTATTTCGAGAGGAG  
TGGCTTCTTGATCCATCACAGA

>2340

TCCTTTGTCCTAGCATAAAGAATAGGTTGTGACATTGGCTTGATGTTTGTATTACATTT  
TTATTTAGGTGGTGAGACCAGGAGTGAGAACAGGGAATTAGCTTCAAACAGGTAAT  
ATCTACTGGAATCCAGCCACA

>2341

GGGGATCAGAAGCTGCCTGGCCTTTTCTTCTGAGCTGTGACTCGGGCTCATTCTCTTCC  
TTTCTCCACAGTTGCTGCTGACACGCCGACCGCCTGCTGCTTCAGCTACACCTCCCGG  
CAGATTCCACAGAATTCATAGC

>2342

GGGGCCATGGTGGGCCAGGATTCCCCTGCTGGATTCCCCAGTGCTTAACTCTTCCTCC  
CTTCTCCACAGCTTCTAACCAAGCGAAGCCGGCAGGTCTGTGCTGACCCAGTGAGG  
AGTGGGTCCAGAAATATGTCAGC

>2343

AGAGGGATGGGCACAAATCGGTCAGGCCAGTCAGGGGATTCAGCCTGATTTCTCTA  
TGTCACTTCTAGGGAGAGAGATGGTGGATTACATCTGCCAGTACCTGAGCACTGTGCG  
GGAGAGACGTGTGACGCCAGACGT

>2344

TGGTCTCTGGAGAAAGAAAGCCTGCTGGAAATGCCTCCTGGTGCCAACTCTGTGCATG  
CTCTGCCTCCAGGTGGTACATTGGCAGAGCCCCATATGCACGCCTACTACCCAGCCCT  
CACCTCTTGGCCCTCCCTGCTAG

>2345

TTTCTGGAGCTCGTGGGGGCACCTCAGTGCCCTGGGGCTGTGCAGTTTGAAGTTCCTT  
TTCTTTCTCAGGCATCCAGCCCTGCGTGTACAGAGCTGGAGATGAACGTCATGGACT  
GGTTGGCAAAAATGCTGGGACTTC

>2346

ACTAGAAAGCCTGGGGAAATTTGGCAAGAGAATACAGAAAGGCTGCCATGATAATCCT  
TTCCCTGCAGAGCACGGTCAGTGAATCCACTTTGATTGCCCTGCTGGCAGCAAGGA  
AGAACAAAATCCTGGAAATGAAAA

>2347

CTTCAGCAGTTTCTGGGGGGTGATCATTCCAGGATGACTCTTTGCTGACAGGTTTCTGT  
GGCCCTTCTAGGCTCACTCCTGTGGAAAAGGCTGGTTTGATTTCCCTTGTGAAGATG  
AAATTTCTGCCTGTGGATGACA

>2348

TTGGCCAGGTGCGAGACATCTTTCCCCTTCATACCTCCCCTCCGGCCAGGTGATGTT  
TGCCCTCCTCAGGTGCCCGTGAGGGGCTGTGGCTCCACATCGATGCTGCTTATGCAGGC  
ACTGCCTTCTGTGCCCCGAGTT

>2349

CGAGCACGCAGGAACGCCTTGCCTCCTCTGGAGAGACCTCAGCCACTAATGCCCATTT  
GGAAACCCACAGGGTCAAGGACAAGTACAAGCTGCAGCAGACCTTCAGTGTGAATCC  
CATCTACCTCAGGCATGCCAACTCA

>2350

GCCCAGAAATGCCCGAGGGAGTGGGGCACCTTGTCTCTAACCTTGGGCACTGTGTTT  
CTTTGTTTCTAGCACTGGCAGATCCCCCTGAGCCGACGGTTTCGCTCTGTAAACTCTG  
GTTCTGTGATTGGTCTTCGGGG

>2351

AGTCTGAAAGTTTATGCATAGTCTTGTCTGATGATTAATCTCAGTTCTCTTTATACTTG  
CAATTCAGGGTACTGAAATGGCTAAATATTTGAATCTCTGGTCAGAAAACGACCTTC  
CTTTGAAATTCCTGCCAAGA

>2352

CACAACTGGGCTCTGGGGATGCTGACAGGGGGTGCATGGAGACTTCACTTCCTTTA  
TTTTTCAAACAGGGTCTAATTGTCTCACAGAAAATGTGTTAAAGGAAATAGCTAAAG  
CTGGCCGTCTTCTCATCCCCG

>2353

TATGGATGCAGCTGCCTCCGTAAGTATCCTTGTGAGCTGGTCCAGCGATGCTCTTCT  
CCCCTTCAGGCTCTCCTTCTCAGACAAGATGTCTTATCAGAAAAGCAGCCAC  
CCCTCAGCCCCCAGTGGACTG

>2354

AGAAAGGAAGTAGCTGGCAGAGCTGTGCCTGTTGATAAAATCAATCCTAATCACTTTT  
TCCCCAACAGGTGCAGTTTTGCCAAGGAGTGCTAAAGAACTTAGATGTCAGTGCATA  
AAGACATACTCAAACCTTTCCA

>2355

CTGACTTAAGGAATCATGATTTGAATGCAAAAATAAATTAATCTGAACCATTTCTTT  
CTTATTTCAAGTGTAAAGCTTTCTGATGGAAGAGAGCTCTGTCTGGACCCCAAGGAAA  
CTGGGTGCAGAGGGTTGTGGAG

>2356

TGAGCTAAGCAGGTGGGAGCGGGGCACCTAGTCCTCCTCCCACTGGCTGCCTTCTTT  
CCCACAGGTGAGTACCCACGTCGGGGTCCATGTGCCCGCCTCAGGCACAGGCAGA  
GGTGGGCCCCACCATGACTGAGAAG

>2357

TGGGGGGCAGTGGGGATTGGGGGCCAGGGTCTTGCCACAAGGACTTAGTGACCCA  
CGACCCCTTACAGTGTCTACATTGGGCCAGCAGGACCTTTAGCATCTTCCCTAGCAGC  
CGTTGAAGCGGAGACCAAGCCAC

>2358

CGTGTCTAGCGGGAGGGCAGGAGGGGCCGCCCTTTGCGCATGGCACCAACCCGGCCC  
TCCTTGTCCACAGGGCACCAGCCCCAGAAGGTGGCCCGCGCGTTCACCAACAGC  
CGGGAGCGCTGGCGGCAGCAGAACGT

>2359

CTGTTCTCTCAAGGGTAGCCTGCATGGGTGGCTGCCCTGCCCCAATCGTGGACTCTTT  
GCCCTTCCAGGGTTTCAGAAGCTGCCAGAGGAGGCCAGAAACAGATCTCAGCCC

CGGGCTCCCAGCTGCCACCTCAT

>2360

GCCACTTCCCAGAAGTCCAAGCCTTAGGATCGCATTCCAAGAGCGCGTCGGCCC  
GTGTCTCCGAGGCGCTCCGCTGAAGGGGCAGGGGCTAGGCTGGGAGACGACGAAGG  
AACAGGCGTTTCTGACGAGCGGGAC

>2361

TAGGCCTTTGTTAGAGTCTCCAAGGTTCAAGTTCTCAGCTGAGGCCTCTCACACTCCC  
TCTCTCCCAGGCCTGTGGGTCTTATTGCCAGCTCCTGCCACACTCCTGCCTGCTG  
CCCTGACGAGAGTCATCATGTC

>2362

TGTCATTCTTCAGCCTCAGCATGTGCTGGCCGGCTGTACCCTGAGGCGCCCTCTCACT  
TGTTCTTCAGTTCTGAGGAGACAGGCCCGGAGCAGCACTAGCTCCTGCCACACT  
CCTACCTGCTGCCCTGACCAGAG

>2363

CAAAGGGGTCAGCCCTGGACAACGCACGTGGGGGTAACAGGATGTGGCCCTCCTCA  
CTTGTCTTTCCAGATCTCAGGGAGTTGATGACCTTGTTCAGAAGGTGACTCAGGTCA  
ACACAGGGGCCCCATCTGGTCGAC

>2364

CTTTGTCAGAGCCTCCAAGTTCAAGTTCAAGTTCTCACCTAAGGCCTCACACACGCTCC  
TTCTCTCCCAGGCCTGTGGGTCTTATTGCCAGCTCCTGCCGCACTCCTGCCTGCT  
GCCCTGACCAGAGTCATCATGCC

>2365

GGGCCTCTGTTGGGAGGGAGGTCCCTGGGCAAGTTGGCTGTGACCTCTCATGCTCCT  
CTTCTTCCCAGGCTGCTGCTCCTGCTGCCCGTGGGCTGTAGCAAGTGTGCCAAGG  
CTGTGTTTGCAAAGGGGCGTCAGA

>2366

AAGGAATATTCACGGAAATATTTCCAGCTATGTGTCGCTAAACTGCATTTATTTATTT  
CTGTTCTAAGATCCCTTCATTAACAGGAGAAATGCAAATACCTTCATATCCCCTCAGCA  
GAGATGGAGAGCTAAAGTCCA

>2367

TTCTTCTTTCCATTTTGTATTTTCCACTTTATCCTTCTCAATTTGGCCTTTCTTCCA  
CTTTCTAGGATCCGAGAACGCTCTAAGCCTGTCCACGAGCTCAATAGGGAAGCCTGTG  
ATGACTACAGACTTTGCGAA

>2368

CGGGGGCGCAGGACTCGGCAGCCGCGCCGGGAGGAGGGTCGGGCGGGTCTCAACCC  
CTCCTCGCCCCAGGCTCCCACTCCATGAGGTATTTAGCGCCGCGGTGTCGCGCCCG  
GCCGCGGGGAGCCCCGCTTCATCGC

>2369

AAATCCCGCGGGTGGGTCCGGGCGAGGGCGAGGCTCGGTGGGCGGGGCTGACCGA  
GGGGGTGGGGCCAGGTTCTCACACCCTCCAGTGGATGATTGGCTGCGACCTGGGGTCC  
GACGGACGCCTCCTCCGCGGGTATGA

>2370

ACATCCAGGTGCTGCTGGAGTGTCCCATGAGAGATGCAAAGTGCTTGAATTTTCTGAC  
TCTTCTTTCCAGACCCCCCAAGACACACGTGACCCACCACCCTGTCTTTGACTATGAG  
GCCACCCTGAGGTGCTGGGCCCT

>2371

TGAAGACCTTTAACAGGGTCGGTGGTGAGGGCTGGGGGTCAGAGACCCTCACCTTCA  
CCTCCTTTCCAGAGCAGTCTCCCTGCCACCATCCCCATCATGGGTATCGTTGCTGG  
CCTGGTTGTCCTTGCAGCTGTAGT

>2372

TGATGGGCTGTTTAAAGTGCACCCCTCACTGTGACTGATATGAATTTGTTTCATGAATAT  
TTTTCTGTAGTGTGAAACAGCTGCCCTGTGTGGGACTGAGTGGCAAGTCCCTTTGTGA  
CTTCAAGAACCCTGACTTCTCT

>2373

GGGGGCGCAGGACCCGGGAAGCCGCGCCGGGAGGAGGGTCTGGGCGGGTCTCAGCCA  
CTCCTCGTCCCCAGGCTCTCACTCCATGAGGTATTTCTTACATCCGTGTCCCGGCCCG  
GCCGCGGGGAGCCCCGCTTCATCGC

>2374

AAAATCCCCCAGGTTGGTCGGGGCGGGGCGGGGCTCGGGGGACCGGGCTGACCGCG  
GGGTCCGGGCCAGGTTCTCACACCGTCCAGAGGATGTATGGCTGCGACGTGGGGTCGG  
ACTGGCGCTTCTCCGCGGGTACCA

>2375

CCACATGTGTGCTGGAGGAGTGTCCCATGACAGATCGAAAATGCCTGAATGATCTGAC  
TCTTCTGACAGACGCCCCAAAACGCATATGACTCACCACGCTGTCTCTGACCATGA  
AGCCACCCTGAGGTGCTGGGCCCT

>2376

TTAGGGAAAGCAGGAGCCTCTCTGACCTTTAGCAGGGTCAGGGCCCCTCACCTTCCC  
CTCTTTTCCAGAGCCGTCTTCCAGCCCACCATCCCCATCGTGGGCATCATTGCTGGC  
CTGGTTCTCTTTGGAGCTGTGAT

>2377

GGGGGCGCAGGACCCAGGGAGCCGCGCAGGGAGGAGGGTCTGGGCGGGTCTCAGCTC  
CTCCTCGCTCCCAGGCTCCCACTCCATGAGGTATTTCTACACCACCATGTCCCGGCCCG  
GCCGCGGGGAGCCCCGCTTCATCTC

>2378

CAAAATCCCCGCGGGTTGGTCGGGGCAGGGCGGGGCTCGGGGGACCGGGTCTGACCGC  
GGGGGCGGGCCAGGTTCTCACACCATGCAGGTGATGTATGGCTGCGACGTGGGGCCCG  
ACGGGCGCTTCTCCGCGGGTATGA

>2379

CCACATGCGTGCTGGTGGAGTGTCCCATGACAGATGCAAAATGCCTGAATTTTCTGACT  
CTTCTGTGACACCCCCAAGACACATATGACCCACCACCCATCTCTGACCATGAGG  
CCACCCTGAGGTGCTGGGCCCT

>2380

AGGAAAAGCCGGAGCCTCTCTGGAGAGCTTTAGCAGGGTCAGGGTCCCTCACCTTCC  
CCCCTTTTCCAGAGCCATCTTCCAGCCCACCATCCCCATCGTGGGCATCGTTGCTGG  
CCTGGTTCTACTTGTAGCTGTGGT

>2381

GGGGGCGCAGGACCCGGGAGCCGCGCCGGGAGGAGGGTCTGGGCGGGTCTCAGCCC  
CTCCTCGCCCCAGGCTCCCACTCCATGAGGTATTTCCACACCTCCGTGTCCCGGCCCG  
GCCGCGGGGAGCCCCGCTTCATCAC

>2382

ATATCTTCTCAGGGAAAGCAGGAGCCCTTACGACAGGTACGGGCCCTCATCTTCCCT  
TCCTTTCCAGAGCCGTCTTCCAGTCCACCGTCCCCATCGTGGGCATTGTTGCTGGCC

TGGCTGTCCTAGCAGTTGTGGT

>2383

CGGGGCGCAGGACCCGGGGAGCCGCGCCGGGAGGAGGGTCGGGCGGGTCTCAGCCC  
CTCCTCGCCCCAGGCTCCCACTCCATGAGGTATTTCCACACCTCCGTGTCCCGGCCCG  
GCCGCGGGGAGCCCCGCTTCATCAC

>2384

CAAAATCCCCGCGGGTTGGTCGGGGCGGGGCGGGGCTCGGGGGACGGGGCTGACG  
CGGGGCGGGGCCAGGGTCTCACACCCTCCAGAATATGTATGGCTGCGACGTGGGGCCG  
GACGGGCGCCTCCTCCGCGGGTACCA

>2385

TCACATGGGTGGTCTAGGGTGTCCCATGAGAGATGCAAAGCGCCTGAATTTTCTGAC  
TCTTCCATCAGACCCCCAAAGACACACGTGACCCACCACCCCATCTCTGACCATGA  
GGCCACCCTGAGGTGCTGGGCCCT

>2386

TATCTTCTCAGGAAAGCAGGAGCCCTCAGCAGGGTCAGGGCCCCTCATTTCCC  
TTCTTTCCAGAGCCGTCTTCCCAGTCCACCGTCCCCATCGTGGGCATTGTTGCTGGC  
CTGGCTGTCCTAGCAGTTGTGGT

>2387

AAAATCCCCGCGGGTTGGTCGGGGCGGGGCGGGGCTCGGGGGACGGGGCTGACCGC  
GGGGCCGGGGCCAGGGTCTCACATCATCCAGAGGATGTATGGCTGCGACCTGGGGCCC  
GACGGGCGCCTCCTCCGCGGGCATGA

>2388

AGGGGATGGGGCGGGCGGGGGCGGGGGGCTCGGACTGCTTGCTCAGCCTCGCTGC  
TTGCTCCTGCAGACGCCAGGCCGAGCCAGTTCGGGTGTCGCCGCTGGATCGGA  
CCTGGAACCTGGGCGAGACAGTGA

>2389

GCCAGGGCTAGGGCAAGAACACCTCCATAACCCAGCCTGGCCCCAACCACGCTCT  
GTTGCTTTGCAGCGAAGCCCACCACGACGCCAGCGCCGCGACCACCAACACCGGCG  
CCCACCATCGCGTCGAGCCCCTGTC

>2390

TCCCGGACGGTGGGGCGGTTGGGAGGTCCCGGGCCCTCTCCTAAATGTCGGCGTCTT  
TGGTGTGTCAGTGCACACGAGGGGGCTGGACTTCGCTGTGATATCTACATCTGGGC  
GCCCTGGCCGGGACTTGTGGGGT

>2391

GGGGGCGCAGGACCTGAGGAGCCGCGCCGGGAGGAGGGTCGGGCGGGTCTCAGCCC  
CTCCTCGCCCCAGGCTCCCACTCCATGAGGTATTTCTACACCGCCATGTCCCGGCCCG  
GCCGCGGGGAGCCCCGCTTCATCGC

>2392

AAAATCCCCGCGGGTTGGTCGGGGCGGGGCGGGGCTCGGGGGACGGGGCTGACCGC  
GGGGCCGGGGCCAGGGTCTCACATCATCCAGAGGATGTATGGCTGCGACCTGGGGCCC  
GACGGGCGCTCCTCCGCGGGCATAA

>2393

TCACATGGGTGGTCTAGGGTGTCCCATGAGAGATGCAAAGCGCCTGAATTTTCTGAC  
TCTTCCATCAGACCCCCAAAGACACACGTGACCCACCACCCGTCTCTGACCATGA  
GGCCACCCTGAGGTGCTGGGCCCT

>2394



AGGGAAAGCAGGAGCCCTTCTGGAGCCCTTCAGCAGGGTCAGGGCCCCTCGTCTTCC  
CCTCCTTTCCAGAGCCATCTTCCAGTCCACCATCCCATCGTGGGCATTGTTGCTGG  
CCTGGCTGTCTAGCAGTTGTGGT

>2395

CACCATAGGAGGGGGCGGAGGTGACGGAGAGGGTCCTCTCTCCGCTGACGCTGCTTT  
GGCTGTCTCCAGATGTGGTGGTGTGTAAGTCCAAGAGGACCATTGAGGAAGCCATGG  
TCAAAAAGTGGGCAGACTTTGCTGG

>2396

GGCCGAAGAAGGTCAGGCCCTCAGCTGCCTTCATCAGTTCCCACCCTCCAGCCCCAA  
CTCCTCTGCAGACAAGCTGGTGTCTAAGAATAACCCGGACTTGTCTTGGGAGACTA  
CTCCCTGCTCTGGAAAGCCACAA

>2397

GCCTCTCACAGTAGCCCCGCCCTGCCGCTGCACAGCGGCCTGCTGGAAGTCACT  
GTTTCTCCACAGCGCATGAGAGCCCAGCCGGCACCCCTGTGGCCATTGAGGAGGAAT  
TCTCTCCTCACCTGCAGCATCA

>2398

GGCCCACCCCAGCCCCTCCCTGAGCCTCTCCTTGTCTGAACTGAAAGTACTCCCTC  
CTTTTCTGGCAGGACGACAATAATGCCTGCCTATTACAAATGTATCCAGGAGGTGTT  
AAAAACCTGGAGCCACTGGTCCA

>2399

TGTAGGGGAGAGGCTGGGGTGGAGGGAGAGGCTCCTTCCCACAGCTGCATTCTCATGC  
TTCCTGCCGAGTTCTTCCCAATCCAGGTCTCCGGAGGCTGAAGCAGGCCATAGAGA  
AGAGGGATCACATCGTGGAGATGC

>2400

TGGGCCTGTTGCCACTCTGTACTCTCTCCCCAGGCCAGCCGCTCAGCCCGTCTTTTC  
ACCCTCTGCAGGAGAGCCTCGTGGCAGGCCAGTGGAGGGACATGATGGACTACATGCT  
CCAAGGGGTGGCGCAGCCGAGCA

>2401

GCTGAGGGAGCGGCTGGAGGCTGGGCAGCTGTGGGCTGCTGGGGCAGGACTCCACCC  
GATCATTCCCAGATTGAGCAGCGACTGCAGGAGGAGCTAGACCACGAACTGGGCCCT  
GGTGCCTCCAGTCCCGGGTCCCCT

>2402

GTTGGGGATGAGTGAGGAAAGCCCAGGCCAGGGAGGTCTGCCCAGCCTCTAACTC  
CAGCCCCCTCAGCATCTCTGGCTACGACATCCCTGAGGGCACAGTCATCATTCCGAAC  
CTCCAAGGCGCCACCTGGATGAG

>2403

GAAAATGTGGTGGAGGCTGGTCCCCGCTGCCGCTGAACGCCTCCCACCCACCTGTCC  
ACCCGCCGAGATCGTTCCTGGAGCCAGGCAAGAACTCCAGAGCTCTGGCCTTCG  
GCTGCGGTGCCCGCGTGTGCCTGGG

>2404

GCAGGCGCAGGACCCGGGGAGCCGCGCAGGGAGGAGGGTCGGGCGGGTCTCAGCCC  
CTCCTCGCCCCAGGCTCCCACTCATGAAGTATTTCTTACATCCGTGTCCCGCCTG  
GCCGCGGAGAGCCCCGCTTCATCTC

>2405

AAATCCCGCCGTTGGTGGGACTGGGGCGGGGCTCGGGGGACGGGGCTGACCACG  
GGGGCGGGGCCAGGGTCTCACACCCTCCAGTGGATGTGTGGCTGCGACCTGGGGCCC

GACGGGCGCCTCCTCCGCGGGTATGA

>2406

TCACATGGGCGCTGTTGGAGTGTGCAAGAGAGATACAAAGTGTCTGAATTTCTGAC  
TCTTCCCGTCAGAACACCCAAAGACACACGTGACCCACCATCCCGTCTCTGACCATGA  
GGCCACCCTGAGGTGCTGGGCCCT

>2407

TGGAGCCCTTACGCGGGTCAGGGCTGAGGCTTGGAGGTGAGGGCCCTCACCTTCC  
CCTCCTTTCCAGAGCCGTCTTCCAGCCCACCATCCCCATCGTGGGCATCGTTGCTGG  
CCTGGCTGTCTGGCTGTCCTAGC

>2408

CGAGGGCCAGGACCCGGGAGCCCGCGCAGGGAGGAGGGTCGGGCGGGTCTCAGCCC  
CTCCTCTCCCCAGGCTCCCACTCCATGAGGTATTTCTACACCGCTGTGTCCCGGCCCA  
GCCGCGGAGAGCCCCACTTCATCGC

>2409

AAAATCCCCGCGGTTGGTCCGGGCTGGGGCGGGGCTCGGGGACGGGCTGACCACG  
GGGGCGGGGCCAGGGTCTCACACCCTCCAGAGGATGTACGGCTGCGACCTGGGGCCC  
GACGGGCGCCTCCTCCGCGGGTATGA

>2410

CACATGGGCGCTGTTGGAGTGTGCAAGAGAGATACAAAGTGTCTGAATTTCTGACT  
CTTCCCGTGCAGAACACCCAAAGACACACGTGACCCACCATCCCGTCTCTGACCATGA  
GGCCACCCTGAGGTGCTGGGCCCT

>2411

TGGAGCCCTTACGTGGGTGAGGGCTGAGGCTTGGGGGTGAGGGCCCTCACCTTCCC  
CTCCTTTCCAGAGCCATCTTCCAGCCCACCATCCCCATCGTGGGCATCGTTGCTGGC  
CTGGCTGTCTGGCTGTCCTAGC

>2412

CGGCGGCTGCGGGGGCGGCCGGGCTGGGGCCGGGCGGGCCTGACTGACCGGCCG  
GTGATTCCCCGAGAGGATTTCTGTACCAGTTTAAGGGCATGTGCTACTTACCAACG  
GGACGGAGCGGTGCGTCTTGTGAC

>2413

CATTCCCAATGGTAGACGTGCTGTGTGGTCTCACATCTCACTCCTGTCTTTCTGTTTA  
CTGCCCTCAGTGGAGCCACAGTGACCATCTCCCATCCAGGACAGAGGCCCTCAACC  
ACCACAACCTGCTGGTCTGCTC

>2414

ACTTCAGCTCCTCAGCAGGGATGCTATGGGGTGTAGGGACAAACGCTGACACTCAGGC  
TCTGCTTCTTAGGGGCTCAGTCTGAATCTGCCAGAGCAAGATGCTGAGTGGCATTGG  
AGGCTTCGTGCTGGGGCTGATCTT

>2415

GGGGGCGAAGGACTCGGGGAGCCGCGCCGGGAGGAGGGTCGGGCCGATCTCAGCCC  
CTCCTCGCCCCAGGCTCCCACTCCTTGAAGTATTTCCACACTTCCGTGTCCCGGCCCG  
GCCGCGGGGAGCCCCGCTTCATCTC

>2416

AAAATGCCACAGGGTGGTGGCGACGGGGGCGGGGCTTGGTGGGCGGGACTGACTAA  
GGGGCGGGGCCAGGGTCTCACACCCTGCAGTGGATGCATGGCTGCGAGCTGGGGCCC  
GACAGGCGCTTCTCCGCGGGTATGA

>2417

TCACATGGGTGCTGCTGGAGTGTCCCATGAGAGATACAAAGTGCCTGAATTTCTGACT  
CTTCCCCTCAGAGCCCCAAAGACACACGTGACTCACCACCCCATCTCTGACCATGAG  
GCCACCCTGAGGTGCTGGGCCCT

>2418

TGGAGCCCTCCGCAGGGTCAGGGCTGAGGCCTGGGGGTGAGGGCCCCTTACGTTCCC  
CTTTTTCCAGAGCCGGCTTCCCAGCCCACCATCCCCATCGTGGGCATCATTGCTGGC  
CTGGTTCTCCTTGGATCTGTGGT

>2419

GCGGGGGCGAAGGACTCGGGGAGCCGCGCCGGGAGGAGGGTGGGGCCGATCTCAAC  
CCCTCCTCCCCAGTGCTCCCACTCCTTGAAGTATATTCCACTATCCTGTCCCGGCCCGG  
CCGGGGAGCCCCGCTTCATCTCTG

>2420

GCCAAAATGCCACAGGGTGGTGGCGACGGGGGCGGGATTGTGGGCGGGACTGACTA  
AGGGCGGGGCCAGGGTCTCACACCCTCCAGTGGATGCATGGCTGCGAGCTGGGGCCC  
GACGGCTTCTCCGCGGGTATGAACA

>2421

TCACATGGGTGCTGCTGGATGTCCCATGAGAGATACAAAATGCCTTAAATTTCTGACT  
CTTCCCCTCAGAGCCCCAAAGACACACGTGACTCACCACCCCATCTCTGACCATGAG  
GCCACCCTGAGGTGCTGGGCCCT

>2422

TGGAGCCCTCCGCAGGGTCAGGGCTGAGGCCTGGGGGTGAGGGCCCCTTACGTTCCC  
CTTTTTCCAGAGCCGCTTCCCAGCCCACCATCCCCATCGTGGGCATCATTGCTGGC  
CTGGTTCTCCTTGGATCTGTGGT

>2423

GGGCTGTTCAGAGTGTCTATCACTTACCGTGACCTGACCTGAATTTGTTTCATGACTATTT  
TCTTCTGTAGCCTGAGACAGCTGCCTTGTGTGCGACTGAGATGCAGGATTTCTCACGC  
CTCCCCTATGTGTCTTAGGGG

>2424

TGGGGCGCAGGACCCGGGGAGCCGCGCCGGGAGGAGGGTGGGGCGGGTCTCAGCCC  
CTCCTCGCCCCAGGCTCCCACTCCATGAGGTATTTAGCACCCGCGTTTCTGGCCGG  
GCCGCGGGGAGCCCAGCTTCATTGC

>2425

TCACATGGGCGCTGCTGGGGTGTCCCATGAGGAATGCAAAGTGCCTGAGTTTTCTGAC  
TCTTCTTTCCAGACCCCCCAAGACACACGTGACCCACCACCCTGTCTCTGAACATGA  
GGCATAACGAGGTGCTGGGTTCTG

>2426

TGGGGCGCAGGACCCGGGGAGCCGCGCCGGGAGGAGGGTGGGGCGGGTCTCAGCCC  
CTCCTCGCCCCAGGCTCCCACTCCATGAGGTATTTAGCACCCGCGTTTCTGGCCGG  
GCCGCGGGGAGCCCAGCTTCATTGC

>2427

AAATCTCCGCAGGTTGCTAGGGGCCGGCCAGGGCTCGGTGGGCGGGGCTGACCCGG  
GGAAGTGGGCCAGGGTATCACATCTCCAGGGAATGTTTGGCTGCGACCTGGGGCCCC  
ACGGGCGTCTCCTCCGCGGGTATGA

>2428

TCACATGGGCGCTGCTGGGGTGTCCCATGAGGAATGCAAAGTGCCTGAGTTTTCCGAC  
TCTTCTTTCCAGACCCCCCAAGACACACGTGACCCACCACCCTCTCTGAACATGAG

GCATAACGAGGTCCTGGGTTCTGG

>2429

CTGGAGACCTTTAGCAGGGTCGGGGCTGGGTCCTGGAGGTCAGAACCCCTCACATTCCC  
CTCCTTTCCAGAGCCCTCTCCCCAGCCACCATCCCCATTGTGGGTATCATTGCTGGC  
CTGGTTCTCCTGGAGCTGTGGT

>2430

CGGGCCCGAAGTGGACGTTCCGGGGCCGACGAGGTCGCTGGGGCGGGCTGACCGCGC  
CCTTTCTCGCAGTACATCGCGGTGCACGTGGTCCCGGACCAGCTCATGGCCTTCGGC  
GGCTCCAGCGAGCCGTGCGCGCTCT

>2431

GGAGGGGCGGCGGCGCGCGGCCAGGCCCGGGACTGAGCCACCCGCTGAGTCCGGCC  
TCCTCCCCCGCAGGGTCTACATCAACTATTACGACATGAACGCGCCAATGTGGGCTG  
GAACAACCCACCTTCGCTAAGAG

>2432

ACAGATCCCAAAGATTCCCGGGGGTGTGGCCTTCAATGGCTCAGGCGTCCCCTGCTG  
TCCCGGCTGCAGTGACCTGGGAGCCAACACCCTCGCTGAGGTTCCAGGAGCCCCCGC  
CTGGAGGAGCTGGCCCCCAGAGCT

>2433

GAGGAAGGGGACCGGTAGAGCGGGGCTGGGTAAGCCTCCATCCAGCCGGGCTGAGCC  
CTGGTCTCCGCAGAGCCTCTGCCCTCCCGAGACACCCGCTACCTGGTGTAGCGGTG  
GACCGCCCTGCGGGGGCTGGCGCG

>2434

GGACGGGGAGCCGGGTGACTGCCCCGGGCCCCAGCCCCTGAGCCAGCCGCGTGC  
CCACCCACCGCAGACTCCCGGCTGAGTACCGCCCGGCTGCAGGCACTGCTGTTCCGGC  
ACGACCACCGCTGCTTACACGGAT

>2435

ACGGGGCAGGAGCGGGCGGGGGCGGCGTGGCCTCGTGGCCGCTCTCAACTCCTCAA  
TTGCGGGTTCAGGCCATCCGCGAACTCGAGGAGTCGCCACCCAGCGCAGACCCCT  
TCCTGGAGACGCTCACGCGCTGGTG

>2436

GAGGGCCCTGCACGCGGCCCGGTGGGGAAGGGGACGGGCCAGGGATTGAGACTCG  
GGCTCTCCCTCAGGATGCAGCACCGAGGCTTCTCCTCCTCACCTCCTCGCCCTGCT  
GGCGCTCACCTCCGCGGTCGCCAAA

>2437

CCCAGGAAGGCGGGTCCCGAGGGAGTCTCCCCGTGCCCCAGTCCTGAACTCTGTTCT  
CGCGCGTTGTAGATAAGGTGAAGAAGGGCGGCCCGGGGAGCGAGTGCCTGAGTGGG  
CCTGGGGGCCCTGCACCCCAGCAG

>2438

GCCTGGGGGGACCTTGGCGGAGGGCGGGGCCGCGGGCGCGCAGCCTGACCTGGGC  
CGCTCTCTCGCCAGCCGACTGCAAGTACAAGTTTGAGAACTGGGGTTCGTGTGATGGG  
GGCACAGGCACCAAAGTCCGCCAAGG

>2439

GTGGAGCCGGCGGTCTGCAATGGGTGAGCCTAACTGCTGATATGGTATTAATATTCTTCT  
TGTTTTACAGCCAAGAAAGGGAAGGGAAGGACTAGACGCCAAGCCTGGATGCCAAG  
GAGCCCCTGGTGTACATGGGGC

>2440

GAGGGCCCTGCACGCGGCCCGGTGGGAAAGGGGACGGGCCAGGGATTCACTCG  
GGCTCTCCCCTCAGGATGCAGCACCGAGGCTTCTCCTCCTCACCTCCTCGCCCTACT  
GGCGCTCACCTCCGCGGTGCGCAA

>2441

ACCCAGGAAGGCGGCTCCCGAGGGAGTCTCCCCGTGCCCAGTCTGAACTCTGTTCC  
TCGCGCGTGTAGATAAGGTGAAGAAGGGCGGCCCGGGGAGCGAGTGCCTGAGTGGG  
CCTGGGGGCCCTGCACCCCAAGCAG

>2442

CCTGGGCGGACCCTTGCGGGAGGGCGGGCCGCGGGCGCGCAGCGCTGACCTGGGCC  
GCTCTCTCGCCAGCCGACTGCAAGTACAAGTTTGAGAACTGGGGTGCCTGTGATGGGG  
GCACAGGCACCAAAGTCCGCCAAGG

>2443

GGAGCCGGCGGTCTGCAATGGGTGAGCCTAACTGCTGATATGGTATTAATTTCTTTCT  
TGTTTTACAGCCAAGAAAGGGAAGGGAAGGACTAGACGCCAAGCCTGGATGCCAAG  
GAGCCCCTGGTGTACATGGGGC

>2444

CATTTACTGTGCTCCCAGTCCCCACCTCTGGCCACACCCAGCTCTCACAGCCTTCTCTC  
CCCACCCGAGAAAGGAGAATAAGAATGAAAAGGTCATAGAACACATCATGGAGGACC  
TGGACACAAATGCAGACAAGCAGC

>2445

TCATAGATGCTATGCCTCGGCTCTCTCTGAGATCTTTAACTCTGGCTTCTTCTCCTCA  
ATCTTGACAGAAAAAGGGTGCAGACGTCTGGTTCAAAGAGTTGGATATCAACTGAT  
GGTGCAGTTAACTTCCAGGAGT

>2446

CCTAGAAGATGAATTTATGTAATATGATTTGCAAATGAGTATTCATTTGTGATTTTTTT  
TTTTTTAAGGTGAAAGTACATTTTTTTGTTGAATTAAGTGAACTGCCAGCATACTCATG  
CATGCAACAGCACATTCTCT

>2447

TTTTTGTTTTAATTCCTTTTTTGTTTTAATTCCTTTGAGTTACTTCTTATGCATATTTTAC  
TTTAACAGGAAGAGGTACTGCAACATTTGATGGGACGGCAATAGCAAATGCAGTTGTT  
AAAGAACTTGCTGAGACTAT

>2448

ACAAATTCGGTTTTTTTGAGAGGGCACTTCTGTTGCTAGCACATGTATCGCTAATATTTT  
CTTTCTTAAGGCATGCATGGTAGAAAATGAATGTGAAGACCCAGCCAGGAGACTATT  
ACGTTCTCTATAAATTCATTA

>2449

AGTAAAAGGGGAAGGGATGATGCACTATGAAAAACAAAAAACTTTTTTTTTTTTTT  
TTTAATTTAAGGGAAGTTGCTGCTAGTGAAGGTCAACTGTAGATGCTGAAGCT  
GTCCATAAATTGCTGACTTTGATT

>2450

GGCCTCTGTTGGGGCAGGGAGTTCTATGATCGAGTCTGCTCTGACCTCTCAATCTCCTT  
TCCTCCCAAGGCTGCTGCTCCTGCTGCCCTGTGGGCTGTGCCAAGTGTGCCAAGGC  
TGCATCTGCAAAGGGGCATCGGA

>2451

CTGCGCCAGGTTCCGCACCAAGACCCCTTAACTCAAGACTGCCTCCCGCTTTGTGT  
GCCCCGCTCCAGCAGCCTCCCGCAGCATGCCCTCAACGTTAGCTTACCAACAGGA

ACTATGACCTCGACTACGACTCGG

>2452

GCCTGAGCGTGC GGGGTTCTGCTAAGGTCTCCGAGTCGGGTTCTGATCCACTGTGCT  
CTTTTCCGACAGGATCAGCAACGCTACCACGAAGACATTTTCGGGCTCACGCTGCGCA  
CCCAGGAGGTGACAAGCCGCATAC

>2453

CCAGCCAGGAGAACGGGCTTTCCCTCTCCTTCCGCCTGCGGAGGGGAAGCTGAAGTC  
TGGTCTTCTCAGGTCTGGTCTTCTCTCGTCTGAGCCCTGAGTACTACGACCTGGCAAG  
AGCCACCTGCGTGATGAGGAGAA

>2454

CTTTCTGGGCACTTTCACGCGCTCCAGAGTGTCTGAGAGACCATCATAAGGGCTTTC  
TTTCTGACAGGGTGACCTGTTGACCAAACACAGGAGCTGGGCCGTGACTACAGGA  
CCTGTCTGACGATAGTCCAAAAAC

>2455

ACCTGCAGGGTTGGCAGAGCTGGGCAGGACTCACCTATAACCATGTCCACTGTGGTG  
CTGCTGCTGCAGAGAAGTGTTCATGCTGCGACCCGGGTGTGTAGGACGGGGAGG  
TCACGATGGCGCGACGTCTGCAGAA

>2456

ATTCTGAGTGCCTGCTTCTCCTTGAGGACCCACCACATCTGCCACAGCTAGCTGTTCT  
CTCCGCTCCAGGTCCCCTCTGAGCCCTCTACCTTGTCTGTGGAAGAAGCACAGGCT  
CCTGTCCTCAGATCCCGGAACG

>2457

CTTCCCCGAGATTCTTTTTCTTACCCACTGCTAACTCCATACTCAATTTTCATGCTCTCC  
CTGTCCCAGGCTCAAGGAAAAACATGGCCTGCTATTGCAGAATACCAGCGTGATTGC  
AGGAGAACGTCGCTATGGAAC

>2458

CCCAGTAGAGCTATAAATCCAGGCTGGCTCCTCCCTCCCCACACAGCTGCTCCTGCTCT  
CCCTCCTCCAGGTGACCCAGCCATGAGGACCCTCGCCATCCTTGCTGCCATTCTCCTG  
GTGGCCCTGCAGGCCAGGCTG

>2459

CTTCCCCGAGATTCTTTTTCTTACCCACTGCTAACTCCATACTCAATTTTCATGCTCTCC  
CTGTCCCAGGCTCAAGGAAAAACATGGACTGCTATTGCAGAATACCAGCGTGATTGC  
AGGAGAACGTCGCTATGGAAC

>2460

CTAATGGCAAAATATGAATGGCCTGAAATGTCGAGGTGGAGGTGTAATGATCTATTTGT  
GTCCATTTTAGGCAGGTAAAAATCAAGGTGACCCCAAGAAAATGGCTCCTCCTCCAAA  
GGAGGTAGAAGAAGATAGTGAAG

>2461

TCATTGGGACCATGGTTATCTTTTTGGGTGTGGGGCTGGACTTACTGGTTTGGTTTTTCAT  
TTATCTCAAGGTCGTCATACCTCAGAAGAAAGGCAAGAAGGCTGCTGCAACCTCAGCA  
AAGAAGGTGGTCTGTTTCCCAA

>2462

TTACATTAGATTTGAAAACCGATGTTGGTTTTGGGAGATTGCTGCAATTTTGGGTGACT  
TCTTTTCAGACTCTGAAGAAGAAGCTATGGAGACTACACCAGCCAAAGGAAAGAAA  
GCTGCAAAAAGTTGTTCTGTGAA

>2463

TATGTTTAAAGGAGGCACTTAAGTGTGTTGTGGCTACTGATGTGTGATACATTGTTTGACA  
TCTTGTCCAGAGCCTGTCAAAGAAGCACCTGGAAAACGAAAGAAGGAAATGGCCAAA  
CAGAAAGCAGCTCCTGAAGCCAA

>2464

AGAAATTTTGCTTTGGAAACTAACTTTTTACCACACTACAAGTAGACTGAGTTGAGCTT  
TTTTTGTGCAGGCACAGAACCGACTACGGCTTCAATCTCTTTGTTGGAAACCTAAACT  
TTAACAAATCTGCTCCTGAATT

>2465

TCTAGATACAGATTGTGATTTTGATTTGTGTTTTACCTGTTGTAATTTGCCCTCCTCTC  
CACCTGAAGGAAATTTGGTTATGTGGATTTGAATCTGCTGAAGACCTGGAGAAAGCG  
TTGGAACCTACTGGTTTGAAA

>2466

CTCTTTTTGTTGTTGCCCCCACCTTTGGTTTTTCAGGCCACAGAGCTCATTTTTGTTTT  
TTAATCTAGAGCGAGATGCGAGAACACTTTTGGCTAAAAATCTCCCTTACAAAGTCAC  
TCAGGATGAATTGAAAGAAGT

>2467

TGTTGCTGAGGTAAAAGCATTTGTGTTAATATGGTTTTAAAAACCATGAGTTCTTCTCCC  
TCCATTGCAGGATTGCTTATATTGAATTAAGACAGAAGCTGATGCAGAGAAAACCTTT  
GAAGAAAAGCAGGGAACAGAG

>2468

AGATATTACTGTTGTGACCGAAGCTGGGACACTGTTTCAGAGTCTTAGGAATGTGGCTC  
TCTATTTGAGGTGAATCAAAAACCTGGTTTTAAGCAACCTCTCCTACAGTGCAACAG  
AAGAACTCTTCAGGAAGTATT

>2469

ATCATGTGACCAGTGGTATAGAGAGCATGTGCCTGGTAAATACTCTAAGCATTAACTG  
TTCATCCTCAGGTATGCATTTATAGAGTTTGCTTCATTGAAAGACGCTAAAGAAGCTTTA  
AATTCCTGTAATAAAAAGGGAA

>2470

TAGGCATTGTGCAAATTCAGTGTACGAACTGTGAATTCACATAAATCGCAAATTTTTTTT  
TCCTTCCCAGAGCCATCCAAAACCTGTTTGTCAAAGGCCTGTCTGAGGATACCACTG  
AAGAGACATTAAGGAGTCATT

>2471

CATGTACAGTTAACTTGGGACATGTGTAGTAGGTGCTTTTTATAATGGGCAATTCATTT  
GGTGTCTAGGTTTGGTTTTGTAGACTTCAACAGTGAGGAGGATGCCAAGGAGGCCAT  
GGAAGACGGTGAATTTGATGGA

>2472

GGTTCCTAATCACTGGGGAGGAGGAGCTTTGTACCCATTCTTTAACAGTGTCTTGCCCT  
TCCTCCTGTAGGGCGAGGAGGCTTCCGAGGAGGCAGAGGAGGAGGAGGTGACCACA  
AGCCACAAGGAAAGAAGACGAAGTT

>2473

CAGCCAGTGCCCATCTTCAACTCGATGTGTTCTAAGGTAGACAGCAAATTCCTATT  
TTATTTCTCAGATTGTCACTGCTGTCCAAGGGCACACGCAGAGGGATTTGGAATTCCT  
GGAGAGTTGCCTTTGTGAGAAG

>2474

TTTTTATTTTGATTGTGGCTATAAGTGAACATCTATCATGAGACATTTGCTGCACTTTCCT  
TGCTTGATAGTTGGTTTTGCGGATTGCCACTGATGATTCCAAAGCAGTCTGTCGTCTCA

GTGTGAAATTCGGTGCCACG

>2475

GGAAGTAAATACTCTCATGCCAGTTAGGAGTGAGTCAGGGTTTTTAATATGCCACTTT  
TCTTTTCTCAGGCAACTCATGCAGCAATCCAGAACCCTGACTCCCACCCGAAGTAG  
AGGAACAGGATGCCAGCACCTG

>2476

GATTTTTTTGGGTTGATGACATATAGAAAGGCAAAGAAAGTGATTGCATGTTTTTGAAA  
ATCATTTTTCAGGACTTTCCTTATCCAGTTGATTGTGCAGAATACTGCCTGTCGCTTG  
TCTTCTATTCACCATGGCTTC

>2477

AAAATTATAGTACAGTTTATTAGAACAGGAGAATCCTGGTTTTCTGAATTATAAATATAA  
TCAATTCTAGATATCCAGGTGAAAGAACTGGAGAAGCGTGCCTCAGGCCAGGCTTTTG  
AGCTGATTCTCAGCCCTCGGTC

>2478

CAGGCGTGAGCCACCACCCAGCCTGAATACATTTTAGAGTGCCTAGCCTATTAAACT  
TTTTTTTCCAGTCCCATGAAGCTGAGGTCTTGAAGCAGCTGGCTGAGAAACGAGAGCA  
CGAGAAAGAAGTGCTTCAGAAGG

>2479

TCGTGACTTGACAGGGCTTTTTTTTTTTTTTTTTTTTTTGGACTGATGACACCTTACCCT  
TCCTTTACAGGATAAGCACATTGAAGAAGTGCAGGAAGAACAAGAATCCAAAGACCC  
TGCTGACGAGACTGAAGCTGACT

>2480

AATGGTTGTTTTTCCATTCATCCCTACATTTCTTTTTTAATAATGATAAACATGCAACT  
TTTTTGAGCTTACAACAAATACCCAGATGCTGTGGCCACATGGCTAAACCCTGACCC  
ATCTCAGAAGCAGAATCTCC

>2481

TAATGTGCTATAAAGGCTAAGGGAAAATAAAAAACCCATATATTAATTTCCCGGCCATCT  
TAATTTTTCAGACCCTTCCAAGTAAGTCCAACGAAAGCCATGACCACATGGATGATATGG  
ATGATGAAGATGATGATGACC

>2482

TGAAAAGGATTACCATATCCCATCCCTAGCCGTTTATATAATTATTCTTCATTTGTGCC  
GTGATTACAGTACCCTGATGCTACAGACGAGGACATCACCTCACACATGGAAAGCGAGG  
AGTTGAATGGTGCATAACAAGG

>2483

GCCTCGCAGGGTCTCCGAGCGAGTCCCAGCGCCGCCCGCGTCCCGCTACCCCGC  
CCGTCACCCCGAGTGCCTCCCTGCGGCCCGGGGGCAAAGGCCGCTGCTTCGGGCC  
AATATCTGCTGCGCGGAAGAGCTGG

>2484

GCGCTCCGGGGCCAGGGGGAGGGCGGGCGGGGGTGCAGCCGGGATTCCCCTGACTCCA  
CCTTTCTCCAGACGGCTGCCACGCCGACCCTGCCTGCGACGCGGAAGCCACCTTCT  
CCCAGCGCTGAAACTTGATGGCTCC

>2485

GAAGTGGGTGGATTTGAAACCTTTTGGGATACTGGATAGCTTGTTCATAGGTTGTGT  
ACTATTTACAGGTATGCTGTACACCAGTTGAAGCAGCATGTCATCGATGGAGAAAAA  
ACCATTATCCAGAATCCACAGA

>2486



CAGCCTGGGTGACAGAATGAGACTTTGTGTCAAAAAAAAAAAAAAAAAATTCTTTCTCTC  
TATTCCTTTTAGGAAGGACCATGAAAAAGCTGAATTTGAGGTACATGAAGTATATGCTG  
TGGATGTTCTCGTCAGCTCAGGA

>2487

ACCAGAGTTGGCAAAGAGGGGTGACTGAGAGTGTTCCACCAGACCAAATGTTACTTAA  
ATTACTCTCTCAGGCCAAGGATGCAGGACAGAGAACCACTATTTACAAACGAGACCCC  
TCTAAACAGTATGGACTGAAAATGA

>2488

AAATATGAGCAAAATGGTAAGACTTGATGGGGAGTTAAAGATACCTCTGAATATCATCT  
TCCCCTGCCAGAGCATTGGAAGATGAGAAGAAGGCTCGGATGGGTGTGGTGGAGTGC  
GCCAAACATGAACTGCTGCAACCA

>2489

CTGTAAGTTCAGAAGAGCTAAGTATGACAAAGGAACTTTTTATCAAACACATCTTCAT  
TTTTGCCATAGGTGAATTTGTTGCCAGTTTAAATTTACAGTTCTGCTCATGCCAATGG  
CCCATGCGGATAACCAGTGG

>2490

CTCTGGTCCCAGACATCCCCAAGTAGTTAGAACTGACAGGTCTTCTCCCTCTCCTTTT  
CTTGCATATAGGCCTCAAGACTGCAGAGAATGCCACCAGTGGGGAAACATTAGAAGA  
AAATGAAGCTGGGGACTGAGGTG

>2491

ACCAGAGGTGTAAGGGCAAGAGTGGGGTGGATGGGTGTGAGATTCCTACAGCCTTGC  
CTGCTCTCTAAAGGCAACTCTAGACATCGCGTCCAACAACCGTAAGGGTATCGCCTTC  
GCTGACTCTGGCGCACTGGCAGC

>2492

GAGGCAACTGGTACAGAGAGGGGGTAAGGGTGCTGATTCATTTCCACCCTCATGCCCC  
CTCTCCCTTCAGTTTGTGAGGAAATCAGTACATTGTGTGATATGCTGGCCACCCACAAC  
GGACAGTCCATAGACATCTCCTT

>2493

AGGAGAGACTCTGGCAGCTGGAGAAGCAAAATGGAAGAAGGGTGGATTTAACATTTT  
TTTTTATTTCCAGATTTTCCCAACAAAACCCTGGAAAAATTAAGAGCCATGTTAAAA  
TACGAAATGATCTGCTGAATAAAA

>2494

GAAGTATGGCAGGAGTGTACAGATGGGGCTCCTTCTTATTAATGTCTCCCAAACCTC  
ACCCAACCCAGGAGAAATTCCGGAGTACTCTATACCAACATGCTGGACACACTGAT  
GCAAGCCAAGATGAACTCAGATA

>2495

TTATTCTAAGCCCTTGCTCTCCTGGGCTTACACACACTAGTCACCTCCAACCTACTC  
TGGTCTTCAGGTGAAGAAGAAGCTTACGAGGAGATTGACCAGAATGTGGGTTTCAGC  
CGCACACCAACTATCAGTGACC

>2496

GGGCATGAGGCTGAGCAAGGAAGGGAGTACGAAGTCCCAGACCCACTTTTCCTCTTC  
CACTCTGGAGCAGCATCGGTGAGTTTGTGTGGACAAGGGCACAGAAGTTATCATCAA  
TCTGTGGGCGCTGCATCACAATGAG

>2497

AACCAGGGCAGAACCATGCCTCTCCTCCCTCCTGCCCTAACCCCTGGCTGATGCCACT  
CCTTGCCAGCAGAGCGTTTCTTGAATCCAGCGGGGACCCAGCTCATCTCACCGTCAGT

AAGCTATTTGCCCTTCGGAGCAGG

>2498

TACCACAAAGAATAAATCCTTTCACTCTGATCAATTTTGTTAACTTCTCACGTGTCTTCT  
CTACACCCAGGGCACCGGTGAATCCAAGTGTCTCTGATGGTCAAAGTTCTAGATGCT  
GTCCCAGGCAGTCCTGCCATCA

>2499

TACCACAAAGAATAAATCCTTTCACTCTGATCAATTTTGTTAACTTCTCACGTGTCTTCT  
CTACACCCAGGGCACCGGTGAATCCAAGTGTCTCTGATGGTCAAAGTTCTAGATGCT  
GTCCGAGGCAGTCCTGCCATCA

>2500

GGGTGTATTACTTTGCCATGCCATTTGTTTCTCCATGCGTAACTTAATCCAGACTTTCA  
CACCTTATAGGAAAACAGTGAGTCTGGAGAGCTGCATGGGCTCACAACCTGAGGAGG  
AATTTGTAGAAGGGATATACAAA

>2501

CAGTCATGTGTGCATCTGTCACGTTTTTCGGGCTCTGGTGAAATGGATCTGTCTGTC  
TTCTCTCATAGGTGGTATTCACAGCCAACGACTCCGGCCCCCGCCGCTACACCATTGCC  
GCCCTGCTGAGCCCCTACTCT

>2502

ACTAGAGAAGGAAAATGACATGAGGCAGTGGGGTATCTGTGTGTTCTCCCACTGACCA  
CGCTTTCTTTAGTGA CTCTGATTGCCTCTCAAGTCG CAGACTATGCTGCCTCCCA  
TGCCCTGCCAGTGATCTTG

>2503

TTCCCAAGGTCATCTCCACCCCAAGCCCCACTTTCATTTACCCTCCCCTCTTCT  
TCCACCTCAGGTGAAGAACCCAGAGGGAAGTGCCTCTGCACGGATCCGCTGTCCC  
AAAGGCTCCAAGGCCTATGGCTC

>2504

CACCTACCTTTGCCCTGCCCTCCCTCAGCAGGTCTCAGGCTCCCTCTCATTCTTTGTT  
GCCCTCAAAGCTGGCCTGCCAGAAGCGGCCCTCTGGAAACCTGGTGTCTGTGCTCAGT  
GGGGCTGAGGGATCCTTCGTGT

>2505

AGTAAGGGGCCATGCAAGAAGAGCTGCAATGGCCATTCCCTTCACCTGGCTACCTCC  
TCTACTCTACAGGGCACCGAGCCCAATGGAGAAGGTTGGGAGTGGAGTAGCAGTGAT  
GTGATGAATTACTTTGCATGGGAGA

>2506

CTGGGATGCCCTTCATTGGATTACAAGCTTCTCAGCCCCATTCCATTTATGTCTTCT  
GTCTCTCCAGCATTTCTGAGGTGGAAAGATTATAACTGTAATGTGAGGTTACCCTATGTC  
TGCAAGTTCACTGACTAGTG

>2507

GGTTGGAGCCCCTCTGTTTTGACCTATAAAGAGAAATGCCCTTGGGCCTCTGTTTTTTT  
CCCTCTTAGGCTGGCAAAGCACACAGGCTGAGCGCTGAGGAGAGGGACCAGCTGC  
TGCCAAACCTGAGGGCTGTGGGGT

>2508

CCTTGAATTGGTGATGTCCAGAAGTCCTTTCTCTTAGAACACTAACCTGGCTCTCACTC  
CACTTAAATAGGCCTTTGGGTTTCATGACAAGAGTGGCCCTGCAGGCTGAGAACTGGA  
CCACCATCCTGAATGGTTTAACG

>2509

CCAGCAGCTAGTACTCCCTCCTGTTCTTAAGTGAAGTCAGTGGAAGCAGAATTTCTG  
GTTTCATTTTCAGGTCCACATCACGCTGAGCACCCATGAGTGTGCCGGCCTTTCAGAAC  
GGGACATAAACCTGGCCAGCTTCA

>2510

GGACATCTCTGGAAAGTCAGCACCTGGACCAGCTCCACCCCTCTCTGAGGACACCTTC  
TTCCCTTTTCAGAACAAAGAACAGCCACCATGCAGCTCTTCTCCTCTTGTGCCTGGTG  
CTTCTCAGCCCTCAGGGGGCCTC

>2511

TTATTTGCAGCTGAGAATTTCTAATTCTGACACAAAATTCTTTTTCATTTTTCCCTTTTT  
CATCTTTAGCTAAGTGGGAGACAAGCTTCAACCACAAAGGCACCCAAGAGCAAGACT  
TCTACGTGACCTCGGAGACTGT

>2512

AATCCAAGGGGTGAGGCTCAGTGTGCCAATGCCCCAGAACAGTCTAAGAAAGCTCCTT  
TTCCCTTTTCAGGCAGCTCGAGCTTACCTTCCCAAATTCTCCATTGAGGGCTCCTATC  
AGCTGGAGAAAGTCTCCCCAGT

>2513

GCTTTGCCATTTGCTATGATGACTTCACCTGCCCTGGTGGCCTGGTGATGCCTGGTGT  
CTCCCTGCAGATGGTGCACAAAGCTGTGGTGGAGGTGGACGAGTCGGGAACCCAGAG  
CAGCGGCAGCCACGGGGACAATCT

>2514

TAACCGCTTCGAAATACAGCCCTTCAGCAGACGGCGTTGATTTTAAAGCATGTGTCTC  
CTGTCTTCTAGTATGTCCAAATACTAAAATGCGCCGCAATGAAGATATCATTACACTA  
AGGGCCGAAGATAACGCGGAT

>2515

TTAAGAAAGTGAGGGTGCCAAATCATTAAATTTCTAACAATTAACTTTTGGAAAATTT  
GTTCTTAATAGGAACAGGAGTACAGCTGTGTAGTAAAGATGCCTTCTGGTGAATTTGCA  
CGTATATGCCGAGATCTCAGCC

>2516

TAAATATATAATGAGCTAATAGATTGCAACTTTCTTGATGTTTTTCAATGATGAATCTTT  
GTTTTGTAGGTTACCATAGAGATGAATGAACCAGTTCAACTAACTTTTGCCTGAGGTA  
CCTGAACTTCTTTACAAAAG

>2517

GAACCTGTTTTGATGGTAGTCATATGTGATACATACTCCTCAGTAATTAACCATCTTCT  
GTCTTTCAGTTGTAGAGTATAAAATTGCGGATATGGGACACTTAAATACTACTTGGCTC  
CCAAGATCGAGGATGAAGA

>2518

GTTTCTGGGACGGAGAGGTCCAGGGACACCCTCGGGCCTAACCCCTGACCCTGAGGT  
CACCCACCTACAGGAAAAACCAGTGTGAGACCCGAACCATGCTGCTGCAGCCCGCGG  
GGTCCCTCGGCTCCTACAGCTACCGG

>2519

ACCCCTTCCCTGAAGCAGAGGTGAGGTTTGGGGGGCTGGTCCCCGACAGGGTTGTCT  
CTTGGGTTCCAGACTGGGGCAGCACCTACTCCGTGTCAGTGGTGGAGACCGACTACG  
ACCAGTACGCGCTGCTGTACAGCCA

>2520

CCCAAGACCCAGGGCAGGGCACACAGCATCCCCCTCCGCTGAGGCCAGCTCCGTCTC  
CACCCGTCCCAGGCCGAACCCAGACCCCCAGGGCTGAGTTAAAGGAGAAATTCACC

GCCTTCTGCAAGGCCAGGGCTTCAC

>2521

TTCCTTCATAAAGACCCAACCTATGACTTTAACTTCTTACAGCTACCACAGCCCCTAA  
ACCCGCAACAGTTGTTACAGGTTCTGGTCATGCAAGCTCTACCCAGGTGGAGAAAAG  
GAGACTTCGGCTACCCAGAGAAG

>2522

TAAGGTTGGGGGAAGAGTGCTGAGCCAGAGCTGGGACCCGTGGCTGAAGTGCCATT  
TCCCTGTGACCAGGCCAGGATCTGTGGTGGTACAATTGACTCTGGCCTCCGAGAAGG  
TACCATCAATGTCCACGACGTGGAG

>2523

TTCCTTAGTGCTGGCAGCGGGAGGGGCGCCTCCTCTGGGAGACTGCCCTGACCACTGC  
TTTTCTTTTAGTGAGTGATGTCCATTTCTTTCTCTGCCAGTCTGGGGCTGGGGTG  
CCAGGCTGGGGCATCGCGCTGCT

>2524

TCCCTGGCCTGATCAGAGCCCCCGGTAGAAGGCACTCCATGGCCTGCCATAACCTC  
CTATCTCCCCAGGCTGTCTGTCAGTGCCGCCGAAAGAACTACGGGCAGCTGGACATCT  
TTCCAGCCCGGGATACCTACCATC

>2525

GGGGTGGCATCCAGGGGCTCTAGGAGGTACCTTTTGCTCCTCACCTGGATCTCTTTTC  
CTTCCACCCAGGTTTCTGCAGGTAATGGTGGCAGCAGCCTCTTTACACAAACCCAGC  
AGTGGCAGCCACTTCTGCCAACT

>2526

GGCAGCCGCAGCCTCCCGCGTGTAGGGTCGAGGCTTGAATGACCCACGTCCCAATG  
TCGCCCTCCAGATGGTGTTCGTGCGCAGGCCGTGGCCCGCCTTGACCACAGTGCTTC  
TGGCCCTGCTCGTCTGCCTAGGGG

>2527

CACCCTGCGCCCCGCTCCACCTGGGGGCGTGGCCAGATCTGACCACGCTCTTCCCTT  
CCCCGCGCCAGGTATGGGAAAAGAGACGGCCCGACACGCTTCTTTCCAAAACGTT  
CTTCCCCGACGGCGAGGACCGCCCC

>2528

GCAACATCATTTAACGACGTCTCCAGGCTCGCCTCCCAAGATCCAATTCCTTCCACTT  
CGTTCCGCAGGTCGGAGGGCCAGACCTGTGGTGAGGACCCCTGAGGCCTCTGGG  
AGATCTGCCAACCCACGCCACGTC

>2529

TATCTCTGGCTACTCAGGAGTCACAACTCCCACCCCTCCTCTCTTACTCCCTCCCTT  
TCCCCCTCAGCTGAAGCTGAAGAAGATGGGGACCTGCAGTGCTGTGTGAAGACC  
ACCTCCAGGTCCGTCCAGGCA

>2530

CCCTCCCCCTTCTAATGCCATTTGCAAACCCAAGGACTGAAAGTCACGTCTCTTCTCTT  
TTCCCTGCCAGAGCCACGCTGAAGAATGGGAGGAAAATTTGCTTGGATCTGCAAGCCC  
TGCTGTACAAGAAAATCATTAAAG

>2531

GCTGCAGAGTGGGGAGTCGGGTGGGGGCCCACTGGCTTGGGAGGGAAAGCAGCGTG  
CCTGTGTCCCCAGGAGCGTCGGTACGCAGGCCTGAAGCCCGGGGAACTCCCCACCT  
GCGAGAGCCTCAAGGACACCATTGCC

>2532

TCACATAGTGTCTGCTGTGTAAACAGGCTGGGGACAGAGGGGCTAAGGACACCTATTC  
CTTCCGGCATAGGGATGTCAGACCAGGCGATCATGGAGCTGAACCTGCCACGGGGAT  
CCCCATTGTGTATGAGCTGAACAA

>2533

GCCACGGTACTGAAGGAGATGGTTCGCTGCCCCTGGTGTCTGGCTGAAAGGAAGCCT  
GTGATTTTTGCAGCTGGTTGGCTCTCACTGACCCAGGGATGTGGCCAGGATCGAAAG  
CAAGACGGTTATCGTCACCCAAGAG

>2534

GAAAAAATGCTGGTGTTCGAAGTCCAAGGTCATTTCTACCAGTGCCCACCCAT  
CGCACCTGTAGGTGACCATGTACGTCATCCATTGAGCATGGGGCCGCTGGGCTCA  
CCTCTGTGGAAGATCGGCATCGA

>2535

CCAGTGAGTGCCTCGGGGACCCCAACCAGGGCCCTGGCGCACTGACTTGGGAGGGG  
TCCTTGTTACAGAGCCTTTGGTCAACAACCTGGCCCTGCAACCCGGAGCTGACGCTCA  
TCGCCACCTGCCTGACCGCAGAGA

>2536

CTCTGGGCTGAAGTACCAACCTCGGGGAGAAGGAAACAAAGATCACAATAAAGAATC  
TTGTCCCAACAGATTCTGGGTATAACCAACCCTGAGGGTGAGAAGAAGTACCTGGCG  
GCCGATTTCCAGCGCCTGCGGGA

>2537

CAATATATAAGAGTATATGTTCTGCTTTGCCTGGCACTCACTACTGCTTCTGTTTAA  
AACTCTCCAGGTCATTTAAGGGCCATCAACCCAGAAAATGGCTTTTTCGGTGTCGCTCC  
TGGGACTTCAGTGAAGACCAA

>2538

CTGTGTGTGCCGGCTGCAGGGACTGCCTGTTTTGAGCCAGGCACTCACGAGCCTTTC  
TCTGTCTTATAGGGGAACCTTGTGCCACCCCAACTCGAGGTTCTGCACCCTGCCAG  
CCAGTGCCCCATCATTGATGCTGC

>2539

ACACCACTGGTTGTGGAGTCTGAATTTCAAAGCCTCTGATGAACATTTCTTTTTTTTT  
CCTGCTAAAGGTGTCCCTCTAGTCTATGAAGCTCTCAGCTGGCAACATGGAGTCTTGT  
GGGGGCGGCCATGAGATCAGA

>2540

CAACAATCAATGGCGTCAGTCTTGCTAGGAGAGCCTCATTTACTAATGAACTCCCTCT  
CTGTTAACAGGCAAAATCATCATGCATGACCCCTTTGCCATGCGGCCCTTCTTTGGCT  
ACAACTTCGGCAAATACCTGGC

>2541

GGGATCTCCTGGGTGGGGAGCTGGCGGCTCGCGGGCCGGCACTGAGTCCCCGTGCTT  
CCCCTTTCTAGGCAAGGAGAAGGAGCCCTGGAGTCGCAGTACCAGGTGGGCCCG  
CTACTGGGCAGCGGCGGCTTCGGCTC

>2542

CCCAGGATGAGTGGGTGGGGTGAGGGGAGCCCCGACTCCCGCCCTAACGCGGCCCC  
CTCGCCCTGCAGCCTAATGGCACTGAGTGGCCATGGAAGTGGTCTGCTGAAGAAG  
GTGAGCTCGGTTTCTCCGGCGTCA

>2543

ATACCACCCAGCTTCTTTGTGCTTGTGTTTTGCTAAAAGTGTGTTTTCTTTCTATTCCCTT  
GGCTCACAGGGACCCGAGTGTATAGCCCTCCAGAGTGGATCCGCTACCATCGCTACCAT

GGCAGGTCGGCGGCAGTCTG

>2544

ATGGGGAAGACCTTTGCAGTGTA AAAACAAGTTGAGTCATTCATAACCTCGTCTATCCT  
CCTTTCTGCAGAATGTCAGCATCTCATTAGATGGTGCTTGGCCCTGAGACCATCAGATA  
GGCCAACCTTCGAAGAAATCCA

>2545

GTGGGAGGCCATAGCTTGGGGATGCTGGCAATGTGTGGGATGGGCCAGGGAAGGCC  
TCTGGCCTACTAGGGCTCTGGCCCTGACCCACGGCCACTCACTCCTCAGAGACGTCT  
CCCACAACCTGCTCCGGGCGCTGGA

>2546

GCGGCACCGCCTCTTGCTGCTCAGCTGTGGGGGCTTCCATCAGCTTTGCCGAATCCCC  
CGTCTCTTCCAGGGATATAAGCAACAACAAGATTTCTACGTTAGAAGAAGGAATATTTG  
CTAATTTATTTAATTTAAGTGAA

>2547

TTGCCAGTGGGGGGCTGGCATAGACCCTTCCCACCAGACCTGGTCCCCAACACCTGCC  
CCTGCCCTGCAGAAACCTGAGTGGGAACCCGTTTGAGTGTGACTGTGGCCTGGCGTG  
GCTGCCGCGATGGGCGGAGGAGCAG

>2548

CCCCCGCACCTCCTGCCCCACCTGTAGGGGCCCCACCTCCTCCAGCACGTCTTCC  
CTGCCTCCCCAGGGGCCACCTGGTGGGGCCCCACGGACCTCTGGCCTCTGGCCAGCT  
AGCAGCCTTCCACATCGCTGCCCC

>2549

GGGCAGAGCCTGGTACCCCGTCTTGGGCCCACTGACCGTTGACACCCTCGTTCCC  
ACCGGTCTCCAGCGGTGCACCCGCTCTGCCCTCGGACACGGAGATCTTCCCTGGCAA  
CGGGCACTGCTACCGCCTGGTGGT

>2550

GCGGGCTGCTGTGAGGGTGGGAGGATGGAGGAGTGCCCTGAGCCCCCTGCCATCCCA  
CACCCGCCCCAGGAGCCTAGACGTGTGGATCGGCTTCTCGACTGTGCAGGGGGTGG  
AGGTGGGCCAGCGCCGAGGGCGAG

>2551

GGTCCCCAGTCTGTTTCGTCCTGGTGTCTGGGCCCTGGCCCGGCCTCACTGTGCAC  
TCGCCACCCAGGCCAGTGCAGGATGCCGAGAACCTCCTCGTGGGAGCGCCAGTG  
GGGACCTGCAGGGACCCCTGACGCC

>2552

GGTCTGATGGCTCGCTCTCCTTCCCTCCCTCTTCTGGGAAGTTCGGGTAGGGGGAGT  
CTGGGCTTCCAGGCTGGGATGGGGTCTGTGGAGCTGAGGCGGCCCTGCCACCAGG  
TCATGGTATTCCCGGGCCTGCGTC

>2553

CAGGCAGTTGGGCATCTCTGACGGTGGCCTGTGGGCAAATCAGGGCCCCAACACCCTC  
CCCTCCTCACAGGGACCCCGGAGAACGGCAGCGAGCCTGAGAGCAGGTCCCCGGACA  
ACAGGACCCAGCTGGCCCCCGCTG

>2554

CCTTCGTGCCCGGCTGCCCTGGGAGACCAACGATACCCTGTTCTCAGTGGTAGCACT  
GCCGTGGCTCAGTGAGGGGGAGCACGTGGTGGACGTGGTGGTGGAAAACAGCGCCA  
GCCGGGCCAACCTCAGCCTGCGGGTG

>2555

GTGTCCAGGAGGGCGACAGGCTAAGGGCAGAGTCTCCACAGAGCCCAGGCTGACACC  
ATTCCCCCGCAGAGGTACAGCCCCGTGGTGGAGGCCGGCTCGGACATGGTCTTCCGG  
TGGACCATCAACGACAAGCAGTCCC

>2556

GAGGGAGGGACGCCAATCAGGGCCAGGCCTCTCACCTGCCACCTGGGCTCACTGACG  
CCTGTCCCTGCAGCTGACGGCCTCAACCACGTGAGCAACGTACCGTGAACATAAC  
GTAACCGTGGAGCGGATGAACAGGA

>2557

CAAGCACCCCTGCCCGCCACCGCCACCCCTGTCCCGTTCACTCACTGCGTCCCA  
CCGCCCCGGCAGGTGGACCTTTGGGGATGGGGAGCAGGCCCTCCACCAGTCCAGCC  
TCCGTACAACGAGTCCTTCCCGTT

>2558

GGGCTTCTGCCGAGCGGGTGGGGAGCAGGTGGGGGTGCCGCGGCTGCCCCACTCGGG  
CCTGTCCCCACAGGTGAGTACCTCCTGACCGTGTGGCATCTAATGCCTTCGAGAACC  
GGACGCAGCAGGTGCCTGTGAGCGT

>2559

CCCCTGCCCCTCGCCTGGGGGTGTTCTTTACACGTGGGACTTCGGGGACGGCTCCCCT  
GTCCTGACCCAGAGCCAGCCGGCTGCCAACACACCTATGCCTCGAGGGGCACCTACC  
ACGTGCGCCTGGAGGTCAACAACA

>2560

CGGTACAGCTGCAGGCCGTGGTTAGGGATGGCACCAACGTCTCCTACAGCTGGACTGC  
CTGGAGGGACAGGGCCCCGGCCCTGGCCGGCAGCGGCAAAGGCTTCTCGCTACCGT  
CTCGAGGCCGGCACCTACCATGTGC

>2561

GGCCGCCACCAGCCCCAGCCCCGGCGTGTGGCCTACCACTGGGACTTTGGGGATGG  
GTCGCCAGGGCAGGACACAGATGAGCCAGGGCCGAGCACTCCTACCTGAGGCCTGG  
GGACTACCGCGTGCAGGTGAACGCCT

>2562

CTGGGCCGGGCTCTGCTTTAAACTGGATGGGGCTCTCAGGCCACGTGCCCCCTTGTT  
CTCGGCCTGCAGAGGGAGGCTGGCGGGTGTGCGCTGAACTTTGGGCCCCGCGGGAGC  
AGCACGGTCACCATTCCACGGGAGC

>2563

CCATGGGTCCCCAGTCCTTCCAGCAGGCCAAATAGACCTGTGTTGGAGGTAACCCCA  
CTCCCACGCCAGGTGCTGATCCGGAGTGGCCGGGTGCCATTGTGTCCTTGGAGTGTG  
TGTCTGCAAGGCACAGGCCGTGT

>2564

GGGCCTGCAGGCAGAAGTGGGGCTGACAGGGCAGAGGGTTGCGCCCCCTACCACCC  
CTTCTGCCTGCAGCGGTGGGCTGCACGTACGTTACGCAACAAGACGCTGGTGTGAT  
GAGACCACCACATCCACGGGCAGTG

>2565

GAGCAGCGGGATCCCCGACTCTGTGACGTACGGAGCCCTCCCGTGATGCCGTGGG  
GACCGTCCCTCAGGCTGGCATGACGCGGAGGATGCTGGCGCCCCGCTGGTGTACGCC  
TGCTGCTGCGGCGCTGTCGCCAGGG

>2566

GCTGTGCCCCCTGCCTGCCCCAGTACGAGCGGGCCCTGGACGTGGCGCAGAGCCCAA  
GCACGAGCGGCAGCACCGAGCCAGATACGCAAGAACATCACGGAGACTCTGGTGTG

CCTGAGGGTCCACACTGTGGATGACA

>2567

CGTGTAGAGAGGAGGGCGTGTGCAAGGAGTGGGGCCAGGAGCGGGGCTGGACTG  
CTGGTCCACACAGGGGCCAGCAGGGAGCTCGTATGCCGCTCGTGCCTGAAGCAGA  
CGCTGCACAAGCTGGAGGCCATGATGC

>2568

CCCCCTTTTTCCTGCCCCACCTCCCTCTACCTCCCTGTCTCTGCACTGACCTCACG  
CATGTCTGCAGGAGACCTCATCCACCTGGCCAGCTCGGACGTGCGGGCACCACAGCCC  
TCAGAGCTGGGAGCCGAGTCACC

>2569

GGGCCATCGTGGGTGTCCCCGGGTGGTTGAGCTTCCCGGCAGGCGTGTGACCTGCGC  
GTTCTGCCCCAGGCCACTACCTGTCTGAGGAACCTGAGCCCTACCTGGCAGTCTACCT  
ACACTCGGAGCCCCGGCCCAATGA

>2570

TGGGCTCTGAGACTGCGACATCCAACCTGGCGGAGCCTGGGCTCACGTCCGCTACCCC  
TTCCCTGCCAGGAGCAGAGACCCAGCGGGGAGTTACCATCTGAACCTCTCCAGCCAC  
TTCCGCTGGTCGGCGCTGCAGGTG

>2571

GGCTCGGCTCTATCCTGAGAAGGCACAGCTTGCACGTGACCTCCTGGGCCCCGGGGCT  
GTGCCTCACAGGAGCCGACAGCGGATGTAAACTACATCGTCATGCTGACATGTGCTG  
TGTGCCTGGTGACCTACATGGTCA

>2572

TGACTTGCTGGGATGCCACACGTGTTGGGCAGCAGACCGAGCCTCCCACCCCTCCCT  
CTTGCTCCAGGTACCACGGCCACGTGGGCATCATGCTGTATGGGGTGGACAGCCG  
GAGCGGCCACCGGCACCTGGACGG

>2573

CCAAGCTCTGCCCTCTGCCCCGCATTGGGGCGCCCTGCGAGCCTGACCTCCCTCCT  
GCGCCTCTGCAGGGCTCAGCCCTGCCTGGTTCTGCAGCACGTCATCGTCAGGGACCT  
GCAGACGGCACGCAGCGCCTTCTT

>2574

CTCCGTGGGAGGTTGGGCAGGGTGGTCTGCCCGTGGCCTCCTGCAGTGCGGCCCTC  
CCTGCCTTCTAGGCGACGCAGCCCTTTTGCCTTCCGGCGCCTGCTGGTGGCTGAGCT  
GCAGCGTGGCTTCTTTGACAAGCA

>2575

GGCAGCCTCTCCTGCCAGCCCTCCTGCCCTCAGCCTCACCTGTGTGGCCTCCTCT  
CCTCCACACAGCACGGGGCATGTGTCCAGGCTGAGCCCGCTGAGCGTCGACACAGTC  
GCTGTTGGCCTGGTGTCCAGCGTG

>2576

AGGTGGCTTCTCATCCCTGTCTGAGCAGGTCTGAGCTGCCGCCCGCTGACCACTGCC  
CTCGTCTGCAGGTGGCTGGGAGCCCGAGCCCCACACCTGCCGGGCAGCAGGTGCTG  
GACATCGACAGCTGCCTGGACTCGT

>2577

GTGACTGGACGGGGTGGGCTGTGTGTGTGACACATCCCCTGGTACCTTGCTGACCCG  
CGCCACCTGCAGTCTGGTGTGCTGGCCCTCCGGCGAGGGAACGCTCAGTTGGCCGGA  
CCTGCTCAGTGACCCGTCCATTGTG

>2578



GGGGTGAGAGGAGGGGGCTCTGAAGCTCACCCCTGCAGCTGGGCCACCCTATGCCT  
CCTGTACCTCTAGATGAAGACCTGATCCAGCAGGTCCTTGCCGAGGGGGTCAGCAGCC  
CAGCCCCTACCCAAGACACCCACAT

>2579

GTAAACATGGGCTTGCTGCAACTGCCTCCTGGAGGCCGGGATGAATTCACAGCCTAC  
CATGTCCCTCAGGTCCAGCACTCCTGGGGAGAAGACAGAGACGCTGGCGCTGCAGAG  
GCTGGGGGAGCTGGGGCCACCCAGC

>2580

GCGTAGCCCCGGGATGCCCTAGCCCCTCCCTGTGAGCTGCCTCTCACAGGTCTGTCTC  
TGCTTCCCAGGACTGGTGGAGGGTCTGCGGAAGCGCCTGCTGCCGGCCTGGTGTGC  
CTCCCTGGCCCACGGGCTCAGCCT

>2581

GAGGGGGCTGCCAGGGGTAGGCTACAGGCCTCCATCACGGGGGACCCCTCTGAAGCC  
ACCCCTCCCAGGTCTTGCTGGAAGCCCTGTACTTCTCACTGGTGGCCAAGCGGCTG  
CACCCGGATGAAGATGACACCCTGG

>2582

GCCGTTGCCAAAGCCCTGCTGTCACTGTGGGCTGGGGCCAGGCTGACCACAGGGCCC  
CCCCGTCCACCAGAGCCTCCTGGTGTACATGCTTTTTCTGCTGGTGACCCTGCTGGCCA  
GCTATGGGGATGCCTCATGCCATG

>2583

TCTGGTGGCCGCTCACTCGAGGCGGGCATGGGGCAGTAGGGGCTGGAGCGTGTGACT  
GATGCTGTGGCAGGTCTGAGGAGCTCTGGCCATGGATGGCCACGTGCTGCTGCCCTA  
CGTCCACGGGAACCAGTCCAGCCCA

>2584

GCCAGCAGGAAACACTCCTGTTGGGTTTTGATGAGGCCCTGGCCCCGGCCTGGGGCTC  
TGTGTGTTTCAGCACTCTACCCAGACCCTCCCGGCCCCAGGGTCCACACGTGCTCGGC  
CGCAGGAGGCTTCAGCACCAGCGA

>2585

TCCTGACCAGCCTGGCTCCGGGGTGCCGGAAGGGCTGGGGTGCGGCACCCACGCCAC  
CCCTCTCCGGCAGGGCATGGTCTGGGGCTCCTGTGCCGTGTATGACAGCGGGGGCTA  
CGTGCAGGAGCTGGGCCTGAGCCTG

>2586

GCCTGCACTGCGCGTCCCCGCAGCTCCCGCCCTGCCACCCGCTCCTACTGACCCGCA  
CCCTCTGCGCAGGAGCCGCGTGTGTTCTGGAGCTACGCGCTACAGCCCGGCCGTG  
GGGCTGCACGCCCGCTCACGCTG

>2587

GCGTCCCGCCCCCTCGCAGGGCCCCGCCCGGCAGCGTCCCTCCCGCCCTCCTGACCG  
CGCCCCCAGAGGTGTGCTGCTGTTCTGGAGCTACGCGCTACAGCCCGGCCGTG  
GACTTGGCACAGGGAAGGGCGCT

>2588

GGCTGGGCCGGTGGGCGCGGGGCTGGGCGCACACCCCAGGGCTGCAAGCAGACAGA  
TTTCTCGTCCGAGGCTGCCAGCAGCTACGTTCTGTGCGCCAGTGGTCCGTCTTTGG  
CAAGACATTATGCCGAGCTCTGCCAG

>2589

CGGCCGGGAGGGCGTCTTAGCTCAGCTCAGCTCAGCTGTACGCCCTCACTGGTGTGCG  
CCTTCCCCGCAGCTCGTGTCTTCTGTGTGGACTCCCTCTGGAGCGTGGCCCAGGCC

TGTTGGTGCTGTGCCCTGGGACTG

>2590

GGGAGAGGGACACGCCCTGGGCTCTGCCAGGGTGCAGCCGGACTGACTGAGCCCCT  
GTGCCGCCCCCAGTTCCGCCACAAAGTCCGCTTTGAAGGGATGGAGCCGCTGCCCTCT  
CGCTCCTCCAGGGGCTCCAAGGTAT

>2591

GCTCCTGGAGCAGGGAGAGCGCTGGCCTCTTCTCTCCGGCTCCCTCCATTGCCTCCG  
GTTTCTCCCCAGGCTCCCGACGTCCCTGCTCCTGGCTTTTGGCCCTGCTCTGCCTGCC  
TGGCTTCAAGAGGCTGGTGCCGT

>2592

AAGCAACAATGGGACCTGGTCTCCAGCATAGAAACCAGCAGTCCTTCTTGGTGGGGG  
GTCCTTCTCCTAGGAAGAAACCTATATCCCAAAGGACCAGAAGTATTCATTCTGCATG  
ACTCCAGACCTCCTTCTGCTTCT

>2593

GGCGGGGATGGGGGAGACCTGTGGTCAGGGCTCCCGGGCAGCACAGCCACTGCCGGT  
CCTTCCCCTGCAGAATCTAGAGCTGCTCCGCATCTCCCTGCTGCTCATCGAGTCGTGGC  
TGGAGCCCGTGCGGTTCCCTCAGGA

>2594

TGGATGAATGAGAGAGGGAGGGAACATTGCCCAAGCGCTTGGCCTCTCCTTCTCTTCC  
TTCACCTTGCAGAGGCTGGAAGATGGCAGCCGCCGACTGGGCAGATCCTCAAGCAG  
ACCTACAGCAAGTTTGACACAACT

>2595

GGGAAGGGTAAGGAGGCAGGGGCTGCCTGGGCTGGCTGGCACCAGGACCCTTCTCT  
CTGCCCTGCCAGGTGAAGTGCCGGACGCACCCTCATCGACATTGGTTCAGGCCCA  
CCGTGTACCAGCTGCTCAGTGCCTG

>2596

GTGGCTGGTTGGGGCAACAGAGGCCTGAGCGTAGAACAGCCTTGAGCCCTGCCTTGT  
GCCTCTGCACAGGGAATGCTGGCAGGATAAGGAGCGCCAGCTGCGAGCCAGGGTGA  
AACGGGTCCTGCCATCGACGTGCAC

>2597

CCCCGTCTGCACCGGGTGAACGAGAGCCATGGTGGGGTGGGACCGCCGTGCAGCCC  
AAGGCCCTCAGTTGGCAGGGACCTGGCACTCCATGGCCATGGCGACCAACAACATC  
TCCCTCATGGCGACACTGAAGGCC

>2598

GATTTTAGGAGTGACAGTGAAGGCAACTCCAATTCAAGTGGCCACTCATCCTATTGTCA  
CCACCTTTCAGGGAGAACAACAGCTGTGTTGAGAAGAAGTCTTGGAGAGAAGACT  
GAGAATCCAAAGAAGTTCAAGATC

>2599

ACACACCTGCACAGGACTCTGCTGAGACGGAGGCTTCATCTTCTTTTGGTTCTTCTCT  
TCTTTCCCAGATACGGTGGCGAACGAGGCCACGCTGCTCGATACTGACTACGACAAT  
TTCCTGTTTCTCTGCCTACAGGA

>2600

AAGGCCTCTGGAGCTCCCAGCTCTCATGGAAGCCCCAGGGGCCAGGACTGACCCA  
GCCTCTTCCACAGCCAGAGTCTGGTGGAGGACGATGAGATCATGCAGGGATTCATCA  
GGGCTTTCAGGCCCTGCCAGGCA

>2601

AGGTCAGATATGAAACAGGTGGGCTGGCACCTGGGCACAGTGCTTGCCCCTGCTGCCT  
CTTCCCTCCCAGGTATGGGAAAAGACACAAAGAGGACACGCTGGCCTTCTCGGAGTG  
GGGGTCCCCGCATGCTGCTGTCCCC

>2602

CAGACCCCCTCATGGCCCCAGCCCCTCTTAGGCCCTCACCAAGGTGAGCTCCCCTCC  
CTCCAAAACCAGACTCAGTGTCTCCAGCAGCGAGCGTGCCACCAGGTGCTGCGGA  
TCCGCAAACGTGCCAACTCCTTCCT

>2603

GCTGGACTACCGGCGCCCGCGCCCCTCGGGATCTCTGGCCGCTGACCCCCTACCCCGC  
CTTGTTGTCGACAGCGGTGACCAGTGCTTGGTCTTGCCCTTGAGCACCCGTGCGCCAG  
CCTGTGCTGCGGGCACGGCACGTG

>2604

GGGGCGGGGCTGGGGCCGGGTTGGGGGCGCGGCACCAGCACCAGCTGCCCCGCGCCCT  
CCCCTGCCCGCAGAGGTGAGCTTCTCAATTGCTCTCTGGACAACGGCGGCTGCACGC  
ATTACTGCCTAGAGGAGGTGGGCTG

>2605

AGGACCAAGACAGGAGGGCAGTCTCGGGAGGAGTGCCTGGCAGGCCCTCACCACT  
CTGCCTACCTCAGTGAAGTTCCTTGTGGGAGGCCCTGGAAGCGGATGGAGAAGAAG  
CGCAGTCACCTGAAACGAGACACAGA

>2606

AACCCAGGTGCCCTGGACTGGAGGCTGTCAGGAGGCAGCCCTGTGATGTCATCATCCC  
ACCCATTCCAGGTGGTCTGCTGGACTCAAAGAAGAAGCTGGCCTGCGGGGCAGTG  
TCATCCACCCCTCCTGGGTGCTGA

>2607

GGGCCTCAGGAAAGTGCCACTGGGGAGAGGCTCCCCGAGCCACTCTGACTGTGCC  
CTCTGCCCTGCAGGAGAGTATGACCTGCGGGCTGGGAGAAGTGGGAGCTGGACCTG  
GACATCAAGGAGGTCTTCGTCCACCC

>2608

GAGGAAAGACATGGCAGCTGAAGCAGAGGCTTACTGGGTATAAATGTGGGCTCGTTTC  
TTCTTTTAAACAGTTCCTGTAAAGGTCAAGACACTGTCAAAGGCCGTGTTCCATTCAAT  
GGACAAGATCCCGTTAAAGGACA

>2609

CTGTCTTCTCACTGCCTCTGAGTGCTTTGATGTGCTGACTCTCACCTCTGATACTTTC  
TCTTCCACAGAGGGAGCCGGTCTTGCTGCACCTGTGCCGTCCCAGAGCTACAGGCC  
CCATCTGGTCTAAGTCCCTGC

>2610

CCTCCGTGCCCCGCCCCGGGCGGTGCAGCTGGCCCGGGTGCTCACGCTCGACTCTCTTT  
CTTCTTTTCCAGGGTCTGCGCTTCGACGCCGGATGAAGCTGGTTTCCGTGCGCCCTGAT  
GTACCTGGGTTGCTCGCCTTCC

>2611

TGAATGGGAGCAGGGACAGGCCTGGGCGTCACCTGAACGCACGCGAATCGGGTCTGC  
TTGTGTTTTCCAGGTGGAATAAGTGGGCTCTGAGTCGTGGGAAGAGGGAAGTGCAGT  
GTCCAGCAGCTACCCACCGGGCTC

>2612

CGGTGTTGGGGCCAAAGCTCTGCTTGATGGGGTCTCAAGTTGCCTTTCTTCCCCCTCCC  
CCCGCCCGCAGCAGTCCGGATGCCGCCGCATCCGAGTCAAGCGCTACCGCCAGAGCA

TGAACAACCTCCAGGGCCTCCGG

>2613

TGAAGGAGTTATTTGATTGAATGGGGGAAATACTCCCCTGGGCCAGCTGAGGTCTCT  
CTTTCTCGCAGTTTCCATGTGGTACACACTCCCCGCTGCACCCTGACTTCAAGAGGG  
CCCTCGGGGACCTGCCCCACCAC

>2614

AGACAGAGAGGTATGAAGACAGGAGGGTTTTCCAGCATGAGCTCAGCTCTTCTTGTTT  
CAACTCACACAGATGGAGGAGACTCTGAGCAGTTCATAGATGAGGAGCGTCAGGGAC  
CACCTTTGGGAGGACAGCAATCTCA

>2615

TGAGGGATTAGACATTTCTGCCATGTCAAGTGTGTCTGTAATCTTCTTGTTTGCTTG  
TCTTTTTCAGGAAGTGAATAAGAAGATAACAGTGTTCAAATGCCGTGAAACACGGCA  
TCATGCTCTAACTTCAGTATAC

>2616

AGACAGAGAGATATGAAGACAGGAGGGTTTTCCAGCATGAGCTCAGCTCTTCTTGTTT  
CAACTCACACAGATGGAGGAGACTCTGAGCAGTTCATAGATGAGGAGCGTCAGGGAC  
CACCTTTGGGAGGACAGCAATCTCA

>2617

TAAACCAATGAGGTATTAGACATTTCTGCCATGTCAAGTCTTGCCTATAATCTTCTTG  
TCTTTTTCAGGAAGTGAATAAGAAGATGACAGTGTTCAAATGCCTTGAACATAATGT  
GATCATGCTCTAACTTCAATA

>2618

GAAGGCCTGGTCCTTCTTGGTCTGCGCAGCCCCTAACTTATCTTGAACCTCCACTGCC  
ACCCCTCGAAGGACGTGGACGATGCCACTCTGTCCCGCCTGGAAGTACAGCGCAAGAT  
TGAGTCTCTGATGGATGAGATTG

>2619

CTGTGCACGAACTGCGTGGCCCGGTGGAATTTGCGCCGCTGTCCATCCTCTGCCTGC  
TCCCGGCCGTAGGAGCTGCGAGACCTGCAGGTGAGTGTGGAGAGCCAGCAGGTGCAG  
CAGGTGGAGGTGGAAGCCACGGTGA

>2620

GCGAGGCGGGACGCTGGGGTGGTGTGCGCGCTCCAGCCGACTAAAGCCTGGGTTAC  
CCCCACTTCTCAGTACGCGGACCTGTCCGACGCTGCCAACCAGGACGAGGCCCTG  
CGCCAGGCCAAGCAGGAGATGAACG

>2621

TGCGCGCTCGGGCCCGGGGAGCGGACGATGAAATGTTCTGCAACTGGCCCCTTCCACT  
CTCCTACCCAGAACGAGGCGCTGCTCAGGCAGTTGAGAGAGCTGGAGGAGCAGTTC  
GCCCTGGAGGCGGGGGCTACCAGG

>2622

TAGCAGTGGGAGCCTAAGAGGAGAGATTCCCACGCCTTCCCCTTGAACCCTTTATCCT  
GCTTTCTTCAAGTGCCTGAGGTGGAGCCTCCCAGGACAGCCACAGCCGGAAGACGGT  
TCTGATCAAGACCATTGAGACCCG

>2623

CTATGATCCAAAGGAGTAGGATGGAGGGTGGCGCTGAATGGCTTGTGCCATCATATGC  
CCTGTCCCAGCAGGTGGTACAGAGTCCCAGAAGGAGCAGCGCAGTGAGCTGGACA  
AGTCTTCTGCCACAGTTACTGAA

>2624

CATCTCCTATCCGAGTCCCCAGTCCCCCTGTCAACCCTGATCCCCTGATCTAGCACC  
CCCTCTGCAGGCGCTGCGCCCCTCATCCTGTCTCGGATTGTGGGAGGCTGGGAGTGCG  
AGAAGCATTCCCAACCCTGGCA

>2625

TTGCTCCTGTCCCTTCTCTTTCTTATCATCCTCGCTCCTCATTCTGCGTCTGCTT  
CCTCCCCAGCAAAAGCGTGATCTTGCTGGGTCGGCACAGCCTGTTTCATCCTGAAGAC  
ACAGGCCAGGTATTTCAAGTC

>2626

GGTCTGAGGGAGGAGGGCCAAGGAACCAGGTGGGGTCCAGCCCACAACAGTGTTTTT  
GCCTGGCCCGTAGTCTTGACCCCAAAGAACTTCAGTGTGTGGACCTCCATGTTATTT  
CAATGACGTGTGTGCGCAAGTTCA

>2627

TGAAAGATAGGATTGCCAGGCAGAACTGGGACTGACCTATCTCACTCTCTCCCTGC  
TTTTACCTTAGGGTATTCTGGGGGCCACTTGTCTGTAATGGTGTGCTTCAAGGTAT  
CACGTCATGGGGCAGTGAACCAT

>2628

ATCGAGTCTCACTAGCTCCAACCAGTTGTGGGTGACAGATCCTACACATCCATGTCTCT  
TTTCTCTGCAGGCCCATGGGTCCACCTGGAGAAATGCCATGTCCTCCTGGAAATGATG  
GGCTGCCTGGAGCCCCTGGTAT

>2629

AACACCTCGTGGCAGCAAGTGGGAGTCTCACTGGCCTGCCCTCCTTCTGTGTGGGG  
CACTCTCCACAGGGCTTCGAGCTCATCTAGATGAGGAGCTCCAAGCCACACTCCACGA  
CTTTAGACATCAAATCCTGCAGAC

>2630

GACCCAGGTGAGGGAGGTGGCTTAGAGACAAAGTGGTCAGTGGCCTGACCCGGACT  
CCTCTGCTCTCAGCCCTCAGTCTGCAGGGCTCCATAATGACAGTAGGAGAGAAGGTCT  
TCTCCAGCAATGGGCAGTCCATCAC

>2631

CAAACAATTAATGTTTAAATTAAGATTAAGACACTAGAGAATGATTTATTTGCTGTCCT  
TTAATTGCAGCAAATCCTTGCTGTTCCACCCATGTCAAACCGAGGTGTATGTATGAG  
TGTGGGATTTGACCAGTATAA

>2632

TCATTGTATAGATTTGTGTCTTATAATGAGTCCCATTAATTTCTCCCTCCCTTCTTCGTCT  
TCTTGACGCGGAATTTTGGACAAGAATAAAATTTCTGAAACCCACTCCAAACACAG  
TGCACTACATACTTACCCA

>2633

AATAAAAATAATGGTTGATTTACTTAACAAATGAGAATAAATAAACATTTTTTTCTTTG  
AAAATTTAGCCAGATCACATTTGATTGACAGTCCACCAACTTACAATGCTGACTATGG  
CTACAAAAGCTGGGAAGCCTT

>2634

AGATTGACAGTCACCATCTCCTTTCTTGAATACATAGATGGATTCTTACCTTAGCTTTCT  
CATTTTTAGGTA AAAAGCAGCTTCTGATTCAAATGAGATTGTGGAAAAATTGCTTCT  
AAGAAGAAAGTTCATCCCTGA

>2635

TATATGATAGACACTTTATATAAGAAAACTTCAACAGCAACAAATAAAATTTTTTCAT  
CATTTTCTAGGTGGACTTAAATCATATTTACGGTGAAACTCTGGCTAGACAGCGTAAAC

TGCGCCTTTTCAAGGATGGAA

>2636

ATTTTAAAATCCCTAAAAATGTGTTCCCTAACTTTTTAACTGATGTTTATTTATTTATTTAT  
TTTTTTAGATAATTGATGGAGAGATGTATCCTCCCACAGTCAAAGATACTCAGGCAGAG  
ATGATCTACCCTCCTCAAG

>2637

GCATTCCAGTTGCTTGAAAGCTTGTGATCAGATGCAATAAATGTTTTATTATTTATTTTG  
TGCAAATAGGAGAGACTATTAAGATTGTGATTGAAGATTATGTGCAACACTTGAGTGGC  
TATCACTTCAAACCTGAAATT

>2638

AAGGCAAGCTGAATACAAACAGTAAATATGCCTAAAATTCTGGTTTTACAACATAATTT  
ACTTTCCACAGTTGCTGGTGGTAGGAATGTCCACCCGAGTACAGAAAGTATCACA  
GGCTTCCATTGACCAGAGCAGGC

>2639

AAGAATCAAACCTGTTTTTATTTTGTGAAGTTTGACATTGGTTGTATCTCTGTCTTCATC  
GCCTTCACAGGAGAAAAGGAAATGTCTGCAGAGTTGGAAGCACTCTATGGTGACATCG  
ATGCTGTGGAGCTGTATCCTGC

>2640

TAAATATTAACATGAAATTTTATTGTTTGCATTTTGAATTTTTTTTGTTTTTGTTTTTTTT  
TCTTATAGCACGACTGAAAATGTAGCTGTTTATATCTGGGACAACCTCCAGAAAGTTCT  
TCCTGTAGGAGTTCTTTAT

>2641

TATCTAGTATACTAGATTTTAAGTTGAAGTAGGATCTTCAGGAGTCTAATCATTATTTCTT  
TTCTTTTAGGAGAGAAGACGATCTGCACCTCGCATTTTGGCATTGACATTTAATTTTAGG  
GTCCTTTATATAGAAGGGA

>2642

AGTTAACAAAATAAAGGGTCTTACAAAATAGGCAATAATAATAATCACTTATTATTA  
TTACATGAAGCTACATGAATGTGTAAGATCTTGGAGGAAGACAGCAGAGAGAGAGAG  
AGAGATCAGAGATCCCAGGGTTA

>2643

ATAAATATTGTCTGATTGGCCCAGGAAAATGTTTGCATTTCTCATATGTAGTATTTGACT  
GACTTTCAGGACAGGAAGATGTACCCAAGCGCATAGCTAAAAGAAGTCCCCCCCCA  
GCAGATGCCATCCCCAAAAGCA

>2644

CCCAGAGCCTGTGACCTCTCCTCGCTGTCGTCATCCTCTACACTCAGGGTCTATCTTCT  
TCACCCTTCACTCTCACACAGTCCCACAGCACAGAACCCGGCTTGGTGCTGACACTA  
GGCCAGGGCGACGTGGGCCAGCT

>2645

GGGGAGTGGCCTACATGAGAATGGACTGCGAGGCCAGACGTTGCATTAATGAGGGCAT  
CCGTGGGCACAGGTCTATTCTTCGCTGCAATGATGAGGGTGCCTGGGAAGGGACA  
CATCAGTGGAGGGCTCGGAGATGG

>2646

ACTGACCCTTCTGGATTTCACTGGCACGGGGCAGGCAGGACTGGCTGATAAGTGCCTG  
TCCTCCTTCTAGGACAATAACGGTGTGATTGGACTGTTGGAGCCCATGAAGAAGAGCA  
TGGTGCCTGTGCAGGTGCAGCTGG

>2647

CTTGTTCTGGGGCTGGCCTAGCCTTGGGCCTTACAGTTGTGGCCTGCATCCCTTACCTT  
TTCATCCTTAGGAAACGACCACTTGGTGATGCTGACAGCTGATGGTGACCTCTACACCT  
TGGGCTGCGGGGAACAGGGCCA  
>2648  
TTAAACTCGGGGCAGAGAGAAGCCATGTGTGTCTGTCTGTCACTGACCGTGGCTTTCC  
CTTTGCCTGCAGAACGACTCCTGGTCCCAAGTGTGTGATGCTGAAATCCAGGGGAAG  
CCGGGGCCACGTGAGATTCCAGGA  
>2649  
TGTGGGAGGAGATTGAGAAGGGCAGCTCTCAGAACACCTTCACCCCTGATGGCTCCG  
GCCTTTCCCCAGGAACTCCGGGCACAGAATCTTGCTTCATACCCCAGAACCTAACATC  
CTCAAGAATTCCACCAAGTCCTG  
>2650  
CTAGCCTGCCACCCATTTGCTGTAGCACGCCCTCTTGCTATTGCTCATCTCTCCCT  
CCTCCCATAGGAAAAGCATACAGCCTGGGCCGGGCTGAGTATGGGCGGCTGGGCCTTG  
GAGAGGGTGCTGAGGAGAAGAG  
>2651  
GGTTTCTCCTGCTACAGAAAGGTGGGCTGGGGATCCTGGAGACAGCTGTACCCATTTT  
TCTCTCTTGCAGGTCGTGTTTTGCGCTGGGGCATGGGCACCAACTACCAGCTGGGCAC  
AGGGCAGGATGAGGACGCCTGGAG  
>2652  
TAGCTTTTGGGCATCAGCTGTCATGGAGCACTGGGGATGTTGGCTGATGTGTCTCCTTT  
CTTTATCTTAGATCCGAGAGACTGAGGTCATCGACCCCCAGGACCTCCTAGAAGGCCG  
ATACTTCTCCGGAGCCCTACCAG  
>2653  
TGTCCCTGTCCCCTGCCCTGAGTCTCTTCCAAAATACGCTGAGTGTCTCTCTCCTTTCC  
GCCATCCAGGTGCCTCTAGATAACCATATCCCTGAGAGGGCAGGGTCTGGGAGCCAA  
GTCCCCACCGAACCCAAGAAAC  
>2654  
AAAGAGGGGTTTCATCCTTAGGTCCTGATGAGGAGCTTGACCCCCGCCTTTCTCTCTC  
CTCCTCTCCAGCTCTGATTGTGGGTGGCATCGTGGGCATCCTTTGCCGTCTTCCTGAT  
CCTACTGCTCATGTACCGTAT  
>2655  
AAGCTTTACCTCACCTTCAAGCCTTTTCTTACCCTGAGAGCCTCCTTTAATTGTCTCT  
TCTTTTTCAGGCCAAGAGGCCAGACAGAGTTGCCCCAGGCCCGGATCAGCTGCCCA  
GAAGGCACCAATGCCTATCGCTC  
>2656  
CTCTTGGAGGACTCAGTATATCCGTCACAACCTCCTCCTCCACTGAGTGCTCCATTTTCT  
TCTGCAACAGCTCTATTGCCAGAACATGAATTCGGGCAACCTGGTGTCTGTGCTCACCC  
AGGCCGAGGGTGCCTTTGTGG  
>2657  
GCACACAGGCCAGTGATTCCATGTATTTTTGAGTGACCACTGCCTCTGTTCTGGCCCT  
TCCCCATCTAGAACCGCCGCTGGCACTGGAGCAGTGGGTCCCTGGTCTCCTACAAGTC  
CTGGGGCATTGGAGCCCCAAGCA  
>2658  
CCTATTCACCTTCCAGCCTTTTCTTGCCTGAGATTCTTTCTTAGTTATCTCCTTTTTTT  
TTTCCCCAGGCCAGGAGTCCCAGACAGAGCTGCCTAATCCCCGAATCAGCTGCCCAGA

AGGCACCAATGCCTATCGCTC

>2659

GAGTCCTAGGTTGAGGAGGGGCTACACTCCTTCTGATCCTCTATGTCTGACACTTCTCA  
TTGTAATAGGATTCAAGAAATGGAAGGATGAATCTTGTGAGAAGAAGTTCTCCTTTG  
TTTGCAAGTTCAAAAAGTAGAG

>2660

AGAGGATGTTAGAAAAGATAACAGGTGCTCTGCTCTCTTCTTCAAACCCTTCCCTGTG  
TTCTCTACAGAGATTGCTGATTTGCTCCTTAAGCAAGAGATTCACTGCCGCTAAGCAT  
GGCTCAGACCAACTCGTTCTTC

>2661

CTAATTCACCTCCAGCCTTTTCTTGCCCTGAGATTCTTTCTAATTATCTCCTTTTTTT  
TTTCCCAGGCCAGGAGTCCCAGACAGAGCTGCCTAATCCCGAATCAGCTGCCCAGA  
AGGCACCAATGCCTATCGCTC

>2662

CTCTGGAAGGTCTCAGTATATCCCTCACACCTTCTTCTCCACTGAGTGCTCCATTTTCT  
TCTCCAACAGCTCTATTGCCAGAACATGAATTCAGGCAACCTGGTGTCTGTGCTCACCC  
AGGCGGAGGGTGCCTTCGTGG

>2663

GCACACAGGCCTGGTTATTCTATTGATTTTTGAGTGACCATGGCCCTGTTCTGGCCCTT  
CTCCATCTAGAACCGCCGCTGGCACTGGAGTAGTGGGTCCTGGTCTCCTACAAGTCC  
TGGGACACTGGATCCCCGAGCA

>2664

GAGTCCTAGGTTGAGGAGGGGCTACACTCCTTCTGATCCTCTATGTCTGACACTTCTCA  
TTGTACCATAGGATTCAAGAAATGGAAGGATGAATCTTGTGAGAAGAAGTTCTCCTTTG  
TTTGCAAGTTCAAAAAGTAGAG

>2665

AAACAAGTATGACTGAATCAATTTGATTTATAAGTATATGCCAATTATGATTATTTTCA  
TTTGGTAGGCTTGAGTTTGAAGAAACAGAAGAACCTGATTTTACTGCATTATGTCAGAA  
ATTAAAGATACCAGATCAT

>2666

ACAGTTTTAACATAGTATCCAGTGTGTGAATTATTTAATGAAATATTTGATCTTTATTTT  
TGTTCCCAGGGAGTTATATTCAAAAGAAAAGGAAGTGTGGGGAATCTGTATCTTTAT  
TGCAGCAGTTGACCTAGATG

>2667

TGATTTGAAAACGAAATAACACAAATTTTTAAGGTTACTGATTTACTTTTTTCTATTCTT  
TCCTTTGTAGTGTCCATAAATTCTTTAACTTACTAAAAGAAATTGATACCAGTACCAAAG  
TTGATAATGCTATGTCAAGA

>2668

CCCTGCGATTTTCTCTCATAAAAGATCTGAATCTCTAACTTTCTTTAAAATGTACATT  
TTTTTTTCAGGGGAAGTATTACAAATGGAAGATGATCTGGTGATTCATTTAGTTAATG  
CTATGTGTCCTGACTATTT

>2669

TAGTTAGAATACTTCATTATTTTATATGATGGATGTACAATTGTTCTTATCTAATTTACCAC  
TTTTACAGAAACAGCTGTTATACCCATTAATGGTTACCTCGAACACCCAGGCGAGGTC  
AGAACAGGAGTGCACGGAT

>2670



TGTTCAAGAGTCAAGAGATTAGATTTTGTTTTAAATTTAATGATCATGTTGTAACCTCA  
TCTTTTTCAGGTGAAAAATGTTTATTTCAAAAATTTTATACCTTTTATGAATTCTCTTGGA  
CTTGTAACATCTAATGGAC

>2671

CTGTGCTCTGTGTGCTGAGAGATGTAATGACATGTAAAGGATAATTGTCAGTGACTTT  
TTTCTTTCAAGGTTGAAAATCTTTCTAAACGATACGAAGAAATTTATCTTAAAAATAAA  
GATCTAGATGCAAGATTATTTT

>2672

GCTTTTTTGATGCATAAAGCACAAATTGTAAATTTTCAGTATGTGAATGACTTCACTTAT  
TGTTATTTAGTTTTGAAACACAGAGAACACCACGAAAAAGTAACCTTGATGAAGAGGT  
GAATGTAATTCCTCCACACACT

>2673

AAAACATTTCATTTTTCTTTTTTCTCCCTTCATTGCTTAACACATTTTCTATTTTTATC  
CCCTCTAGGACTGTTATGAACACTATCCAACAATTAATGATGATTTTAAATTCAGCAAGT  
GATCAACCTTCAGAAAAT

>2674

ATGGAGCAGAAAATTAATTCTGATTACACAGTATCCTCGACATTGATTTCTGTTTTTA  
CCTCTAAAGAACTGCACAGTGAATCCAAAAGAAAGTATACTGAAAAGAGTGAAGGA  
TATAGGATACATCTTTAAAGAGA

>2675

TACTTTTAGTAAAAAATTTTTTCTTTTTATAGAAGTAAGTATTTTATAATCTTTTTTTTT  
TCCTTTAGCAAACCTCTGAATGACAACATTTTTCATATGTCTTTATTGGCGTGCGCTCT  
GAGGTTGTAATGGCCACA

>2676

AACTTCAAAAAAATACCTAGCTCAAGGGTTAATATTCATAAATAGTTACTTTTTTTTT  
TCATTTTTAGGAAGTACATCTCAGAATCTTGATTCTGGAACAGATTTGTCTTTCCCATGG  
ATTCTGAATGTGCTTAATTT

>2677

ATGATTTTGATATGTACCTGGGAAAATTATGCTTACTAATGTGGTTTTAATTCATCATGT  
TTCATATAGGATTCACCTTTATTTGATCTTATTAACAATCAAAGGACCGAGAAGGACCA  
ACTGATCACCTTGAATCTG

>2678

TTGAAGTGTATGTATAATCTGTGATTCTTAGCCAACCTGAAATGAAGACTTTTCCTTTAA  
ATATATCTAGGTATCTTCTCCTGTAAGATCTCAAAGAAAAAAGGTTCAACTACGCGT  
GTAAATTCTACTGCAAATGCA

>2679

TGATTTGAAAAAATCTACTTGTAATTCAAAATGAACAGTAAAAATGACTAATTTTTCTT  
ATTCCACAGTGTATCGGCTAGCCTATCTCCGGCTAAATACACTTTGTGAACGCCTTCTG  
TCTGAGCACCCAGAATTAGA

>2680

AAATGGTATTTTTAAGAACAAAACCATGTAATAAAATCTGACTACTTTTACATCAATT  
TATTTACTAGATTATGATGTGTTCCATGTATGGCATATGCAAAGTGAAGAATATAGACCTT  
AAATTCAAAATCATTGTAA

>2681

TTTTAAAATTCATTTAACAAGTAAATTTACTTTTTTTTTTTTTTTTTTTTTTTTACTGTTT  
TTCTCAGACATTCAAACGTGTTTTGATCAAAGAAGAGGAGTATGATTCTATTATAGTAT

TCTATAACTCGGTCTTCA

>2682

TGGAAAAATCTAATGTAATGGGTCCACCAAAACATTAAATAAATAATCTACTTTTTTGT  
TTTGCTCTAGCCCCCTACCTTGTCCACCAATACCTCACATTCTCGAAGCCCTTACAAGTT  
TCCTAGTTCACCCTTACGGA

>2683

TAACCTGAGGTTGCTAACTATGAAACACTGGCATTAAATGATTTAAAGTAAAGAATTCT  
GTAATTTGTAGACTTCTGAGAAGTCCAGAAAATAAATCAGATGGTATGTAACAGCGAC  
CGTGTGCTCAAAAGAAGTGCTG

>2684

TATATGGCAGCCACTTGCCAACTTACCCAGTACCATCAATGCTGTTAACAGTTCTTCATC  
CTTTTTCCAGCTTCTACTCGAACACGAATGCAAAGCAGAAAATGAATGATAGCATGG  
ATACCTCAAACAAGGAAGAGAA

>2685

TGCTGTGCGAGAATGTTGCACAGGGAGTTACAGAATGTTCTCATGACTGAATTGCTTTT  
AAATTTACAGTGTGCCTGCATTTGAAGCTTGAAATATCTCCCAGGAAGTATCTTC  
AGGCAGACTATTGAAGTCGGCC

>2686

ATTATTAATAAATGATACAATCTCGGGAAAATTTTTTGATTTTCATGAAATTCATGTGTT  
TTTCTATAGGTAACACAAATTCTGACTGCTATGATATGCCTTTGTTTTGGAACAGTTGTC  
TGCTCTGTAATTGATATT

>2687

AATGAAGATAGGTTTATTGAATGTGCCAGCAAGTGCAGGCCAGGTCTGAGTGTCTT  
CATTATTACAGGTGAGAGGAAGCCTGGGAGCAAACACTGCCAGCAGCATAGCTGGGG  
GAACGGGAATTACCATCCTGATCA

>2688

TAAGAAAATAAACTTTTGGGGCGAATACCAATGTGACTCTTTTTGTTTGTCAATTTGTTGC  
TGTTCAATAGGAAATTGTAGTGATGATGCTGTTTCTCACCATTCTGGGACTTGGTAGTG  
CTGTGTCACTACAATCTGTG

>2689

TCTCTTGAGCGAGACTTCTAGGGATGGGAAATTTGTGGTGATTGATATGAAATGATTTT  
TCCCTTATCAGGTCCAGAGGATCGTGTATGAAGAATAAACATATATTCAGCTACTT  
ACAGTGAGTTGGAAGACCCAG

>2690

GTGCCCTCAGTCCCTCCCCAGGCCTCTATCTCCAGACATCCTTAACCCCTCTGTCCC  
TCCCTTTGCAGCCGGATCCAGAGCAATGTAGAAGGCCTATACCTGACTGATGGGGTCCC  
TTTCTCCTGTTGCAACCCCCAC

>2691

CCTGCCTCAACCCTGGGCCTCTGGAACCGCTGACTCTCCCTGACTCTTTCCCTTGC  
TTCCCCACAGGCTCTGGTGCTCCTTGGCCTGCGGTACCTGCAAACAGCACTGGAGGG  
GCTTGGAGGGGTCATTGATGCGG

>2692

GGGCTCGGCGCCGCACTTCCCAGAAGTTGCGCTGGCTCGTGAGTGATCCTGTCCT  
CTCCACCCGAGGGCCGCTTCGCACCAAAACCGTGAAGAAGGCGGCCCGGGTCATC  
ATAGAAAAGTACTACACGCGCCTGG

>2693

CATGTGCTCAGTACCAGGTGGGAGTTGATTTGTCTTCTCACTGTTCTCTTTGGCTGTGT  
GTGCTTTGTAGTTATGTCACGCATCTGATGAAGCGAATTCAGAGAGGCCAGTAAGAG  
GTATCTCCATCAAGCTGCAGGAG

>2694

GTGTTTTCTTCTGGGGTCCACTCACAGATCTACCAGTAACTGCTCACTGAATCCATTT  
TCTCGTTCCAGGACTTCGGCAGTCTGTCCAACCTTCAGGTCCTCAGCCTACAGTTGG  
GATGAATTTCAAACGCCTCGGG

>2695

CTTTGTAGATGGCTCTACAATTACCTGTATAGATAGTTTCGTAAACTATTTCCCCCTTTT  
AATCCTTAGCTGAACATCTCCTTCCCAGCCACTGGCTGCCAGAACTCATTGAAGTGG  
ACGATGAACGCAAACCTTCGTA

>2696

GTCACAATCCTGTACTGTATAATTTGGAATAGAAATAGTAAATGTGTCATTCATTGTATG  
CTCTTGACAGGGTTATGTGGTCCGAATCAGTGGTGGGAACGACAAACAAGGTTTCCCCA  
TGAAGCAGGGTGTCTTGACCC

>2697

ATTAACATTCTGATTTAGGATTCTAAGGAAGTTGTTGAATAAAATCTCTTCAACTGT  
TTCTTCTAAGGAGAGAAGGATATCTGGACTGACTGATACTACAGTGCCTCGCCGCT  
GGGCCCAAAGAGCTAGCAG

>2698

GATGTTTTTAAAGTAGATGTGGATTCTAACAAAACAAATATTGAAATGATTGAGTCCTTT  
GAATTTTLAGGTAAGAAACCTAGGACCAAAGCACCCAAGATTCAGCGTCTTGTTACTC  
CACGTGTCCTGCAGCACAAACG

>2699

TCGACCTGGCTTTGGATTTGCGTCTTTAACCCAGAAAGGCCTTAACTGTTTGCTGTTTT  
GTTTTGTTTAGGAGGCTAAGGAGAAGCGCCAGGAACAAATTGCGAAGAGACGCAGAC  
TTTCCTCTGCGAGCTTCTACTT

>2700

TGACCCAGAGGGATTACGGGATTCAGGGGGTCAAGTGGGCCTCCACTCTGATGTCTCT  
TGCCACTCACAGACCAAGTGCTTCATCTGTGGAATCGGCAGTACTACTTTGATACGA  
CACCGCATGGCTTCGAGACTACA

>2701

AATATATATATATATATGTCTCAAGGGTTTGAAGATGTGACCAATGAACTCTTTCTATCCC  
CAATCCTAGGAGTCTTATGTCTGGAAGATGTACCAAGAGAGATGTTGGGATTTCTTCCC  
AGCTGGTGATTGTTTCCGTA

>2702

TCCCCTAAGGTGTTGTTGGAGTCTTTATGTTCTCTGATGTCCCTTCTGCCTTTCCTT  
TCCTTCCAGGGGCTCGGGACATGTGGAGAGCCTACTCTGACATGAGAGAAGCCAATT  
ACATCGGCTCAGACAAACTT

>2703

AAGAATGGGAGGGTGAGCTGTTGCTCACTGGCCTGATGATTAATCTCCTTCTGCCTGC  
CTGGACTACAGCAATGCCAGAGAGAATATCCAGAGACTCACAGGCCGTGGTGCGGAG  
GACTCGCTGGCCGATCAGGCTGCC

>2704

GTCCCGCGTAAGCCAGCCTGGTGCCACCCGGAGCGGCGTTAACGGGTGCGTGGTGT  
CTCGGCTCTGCAGGGCGTCATGGTCCGTATGGGTGAGAAAGATTCCTACGTGGGCGAC

GAGGCTCAGAGCAAGAGAGGTATCC

>2705

CGGCCGCTAGCGCTGAGCGCCTAGCCTCGGCCTCGCCCCAGCCACTACTCTCTCCC  
GCGCGCGCACAGGCATCGTGCTGACTCCGGCGACGGCGTCACCCACAACGTGCCA  
TTTATGAGGGCTACGCGCTGCCGCA

>2706

GCCCCTGACCCGGGCGGAGGGCCGCGGGCGCCTGAGTGAGGGCTCCTCTCCTGCTT  
CTGCCCTCCGAGCTGAGCGCGAGATCGTGCGCGACATCAAGGAGAAGCTGTGCTAC  
GTGGCCCTGGACTTCGAGAACGAGAT

>2707

CTGCCCCGGCCCCAGGCCCGCGCCCCCGGCCGAGCTTCTGCTCACGCTCCCCGC  
CGCGGTCCCCAGGTATGAGTCGGCGGGCATTACGAGACCACCTACAACAGCATCAT  
GAAGTGTGACATCGACATCAGGAA

>2708

TGGCTGCGCGGGCTGTCGGCGGGGTGGGCTCCAGGGTGAGGTCTCCCCACCTCAG  
CGCTGTCTTGAGATCATCGCCCCCGGAGCGCAAATACTCGGTGTGGATCGGCGGC  
TCCATCCTGGCCTCGCTGTCCACCT

>2709

GGTTGAAGCTGAGATATCTTTCCCTGCATTTATACTGAAGGTCATTATCTTTCTTCTTT  
ATCCCGCAGACCTCAGTGGGAAGGTGTTTGTATTTCCTAGAGAATCTGTTACTGATCAT  
GTAAACTTGATCACACCGCT

>2710

AGTGGGGGGTAAGAGTTGTAAGGGAGCTTTGGAGATAATGAATGCATACCTTCTTATTA  
TCAATTACCAGGTGGATCAAAGGCCGATTACCAAGTGAATTTCCCAATTTCCACACG  
GACAAAAGGGCCAGCACTATTC

>2711

GGCCCAGCTACCATCCCCACCCTTCACTTTTTACTATACTCACATCACTGATTCTCTTCT  
TTCTCTTAGGTGTCAGTTGACCTCAGTGAATTCTGTGATGTTTCTGAGATGCAGACTC  
CCGTGTAGTTTCAGATTCTTG

>2712

GGTGGGAGGTAAGAGTTGCAAGAGAGCTTTGGAGATAATGAATGCATACATTTCTATTA  
TCAATTACCAGGTGGATCAAAGGCCAATTGCCAAGCGGATCTTCCAATTTCCACATG  
GACAAAAGGGCCAGCACTATTT

>2713

TCCAGCTCTCCATCCTCACCCCCACTCTCCACTATCCTCACATATCTGGTTGTCTTTT  
TTCTCCCTAGGTGTCACCCGACCTCAGTGAAGCTTTGATGTTTCTGAGAGGCAGACTC  
CCATGTGGTCCCAGATCCTTG

>2714

CCTGACAGAGCACAGTGGGGGAAGATGTTGGCAGAGGTGGCAGATGGGCTCACGGCC  
ATCCCTCCAGCAGGAGCAGCGACTGGACCCAGAGCCATGTGGCTGTGCCCTCTGGCCC  
TCAACCTCATCTTGATGGCAGCCTC

>2715

ATCGAGTCTCATTAGCTCCAACCAGTTGTGGGTGACAGATCCTACACATCCATGTCTCT  
TTTCTCTGCAGGCCCATGGGTCCGCTGGAGAAACACCATGTCTCCTGGGAATAATG  
GGCTGCCTGGAGCCCCTGGTGT

>2716

ACGCCTGCGTGGCAGCAAGTGGGAGTCTTCACTGGCCTGCCCCTCCTTCTGTGTGGGG  
CACTCTCCACAGGGCTTCCAGCTCATCTAGATGAGGAGCTCCAAGCCACACTCCACGA  
CTTCAGACATCAAATCCTGCAGAC

>2717

GACCCTAGGTGAGGGAGGTGGCTTAGAGACAAAGTGGTCAGTGGCCTGACCTGGACT  
CCTCTGCTCTCAGCCCTCAGTCTGCAGGGCTCCATAATGACAGTAGGAGAGAAGGTCT  
TCTCCAGCAATGGGCAGTCCATCAC

>2718

CTGGCACGGGTGAAAGCAGAGCTGCTCCCTGACCCTCTGCCCCTCCCTCCTCCACCCT  
GGCCTGCTTTAGCTTTCCCCAGACATGGCCAACAAGGGTCCTTCCTATGGCATGAGCCG  
CGAAGTGCAGTCCAAAATCGAGA

>2719

CCACCCTGTGAGTCTGGGCCAATCCCTGAGCTGACTGCTAAGCTGCGTCCTATGCCCT  
ATGCCTGGTAGATTCTGAGCAAGCTGGTGAACAGCCTGTACCCTGATGGCTCCAAGCC  
GGTGAAGGTGCCCGAGAACCAC

>2720

GGCAGGCCCTGGCTTGGAGTCTGTTTATACGTTCTTGATGTTTCATCTCCTCTCCTGT  
CTTCTCACAGGCAAAGACATGGCAGCAGTGCAGAGGACCCTGATGGCTTTGGGCAGC  
TTGGCAGTGACCAAGAATGATGG

>2721

AGAGGGATCAGAAAACGGGTGGAAAACACACAGTTCTACCAAGCTTTATCCTGGTTC  
CTCCTCTTCTAGGAAAGCGCAGGAGCATAAGAGGGAATTCACAGAGAGCCAGCTGCA  
GGAGGGAAAGCATGTCATTGGCCTT

>2722

GGTGGCCAGGGGTTGGCCTGGTTCCTCTGCTCTGCCTCTGATTTCTACCATGCGCTCC  
TCCCACTGCAGAAGGAACCCAATGTGGCTCGCGTGGGCTCCGTGGCCATCAAGCTGTG  
CAATCTGCTGAAGATAGCACCAC

>2723

ACCCAAATGCCAGCACAGGAGGACCAGGATTGGAACAAGTGTGACCTCTCATGTTT  
ACTTTGTTTCAGAATTGGGGGGTTCTATGCTCTTTCCCCATACCCCGTCTCCGCCTCAT  
CTCTCTCAATATGAATTTTGT

>2724

CCCCTTTCTCTAGCCAGGGCTGCCTGGACCCCTGGATGCCCTGATTACCATCCTTAATTC  
TCCCTACTAGGTGCATATAATTGGCCACATTCCCCCAGGGCACTGTCTGAAGAGCTGGA  
GCTGGAATTATTACCGAATTG

>2725

GGCATCCTATCTCCCCAGATGTCTTCCCTACCCCTCCCTAGAATCTTCTGAATGTAGTACC  
TTCTGGCCAGGTATGAGAACACCCTGGCTGCTCAGTTCTTTGGCCCACTCATGTGGAT  
GAATTTGAGGTCTTCTATGAT

>2726

CAGGATGTGTGGCCCCTCCCTGGAGTTACCCTTGCTCCTTGCCCCTCCAGTCAGCCCCA  
CATCCTTGACAGTTACCGTGTGTACCAAATAGATGGAACTACTCCGGGAGCTCTCACG  
TGGTCTGGACCATGAGACCTA

>2727

AGGTCGCTGGCTATTGGTGTGGTGTGTGGTGGAGGCTGCTAGTGAGTCACCTGTGACCA  
CTCTTGTTTCAGGATGATAAGGATGCCTTCTATGTGGCAGACCTGGGAGACATTCTAAA

GAAACATCTGAGGTGGTTAAAAG

>2728

CCCATGCTTTTCTGTTTATTCCACGTGTTAAGCCACATATGGATAGCATGACACCACTCT  
TCTTTTTCAGACTGAAATACAGTTGGTGACAGTCTGGGGGTGCCTCCAGAGAGGATT  
ATCTATGCAAATCCTTGTAAC

>2729

TTTTTATTTTAATTGTGGCTATAAGTGAACATCTATCATGAGACATTTGCTGCACTTTCCT  
TGCTTGTAGTTGGTTTTGCGGATTGCCACTGATGATTCCAAAGCAGTCTGTCGTCTCA  
GTGTGAAATTCGGTGCCACG

>2730

TTCTCCTAGTGTGGCTATTATTTAAGAAATACTAAGACACAGTGTCTCGTCTCTTTATT  
TTACCCAGCTTCCATGTAGGAAGCGGCTGTACCGATCCTGAGACCTTCGTGCAGGCA  
ATCTCTGATGCCCCGCTGTGTT

>2731

TTCAGCCTATCTGCTGCATACATTTTTGTTATTAGCTGTGGATCTGGCTGACTTATTTCT  
TGATTCTAGGCTGAGGTTGGTTTCAGCATGTATCTGCTTGATATTGGCGGTGGCTTTCCT  
GGATCTGAGGATGTGAAAC

>2732

GTGATGTTACTCCCCATGTGAATTTCCACAATGAAGGCTGCTTTTCTTTCTGTTTC  
ACTCTCTTAGATCACCGCGTAATCAACCCAGCGTTGGACAAATACTTCCGTCAGACT  
CTGGAGTGAGAATCATAGCTG

>2733

GACGAATCACTTCATGTATAACTGAAAGCTGATGCAAAAAGTCATTAAGATTGTTGATC  
TGCCTTTCTAGACGAAGATGAGTCGAGTGAGCAGACCTTTATGTATTATGTGAATGATG  
GCGTCTATGGATCATTTAATTG

>2734

AAACAATTAAGAGGACTGGTCACAACACGTGTAATTAAGTAGTACTTCCTCTCTCCGTC  
TCTTTATATAGACCTAAACCAGATGAGAAGTATTATTCATCCAGCATATGGGGACCAA  
CATGTGATGGCCTCGATCGGA

>2735

GGAAGTAAATACTCTCATGCCAGTTAGGAGTGAGTCAGGGTTTTTAATATGCCACTTT  
TTCTTTCTCAGGCAACTCATGCAGCAATTCCAGAACCCCGACTTCCCACCCGAAGTAG  
AGGAACAGGATGCCAGCACCCCTG

>2736

GTGGGTGAAATCATGATGCCAGGTGTGTAGCCTGGATCCTGATTAAGGTTGCTCTGGCC  
CCAAACCACAGCTGCCTGGACCACCTCATCCTTGGCCTGTGCCAGGGCCCTGAGTTC  
TGGTGCCAAAGCCTGGAGCAAGC

>2737

AACCTCCCCATTGGAGCTGGGAGCCTCCCCACTCATGTGTCCTCCACCTTGGGGCCC  
CTCCCTCCCAGGATGACCTATGCCAAGAGTGTGAGGACATCGTCCACATCCTTAACA  
AGATGGCCAAGGAGGCCATTTTCC

>2738

CTTGTGTCCAGGGACTTGGGCGGGGTAGACCTCAGAGAGGCCAGCTGACGGCCCCC  
TCTGGCCTCCAGGACACGATGAGGAAGTTCTGGAGCAGGAGTGCAACGTCCTCCC  
CTTGAAGCTGCTCATGCCCCAGTGCA

>2739

TTGGGCCGGCCTGAATAGGGGTGGGCTTCCCTCCCAGACCCTAACACTCCCACCCTGT  
GCTGTGCCCCAGGACTCAAACGGCATCTGTATGCACCTGGGCCTGTGCAAATCCCGGC  
AGCCAGAGCCAGAGCAGGAGCCAG

>2740

AGAGGGGAGGAGAGCCTGGAGGACTTCTCCCAGCACCCAGCCTGGCCTCCACCTG  
ATTCTTTCCCAGGATCTCTCCGAGCAGCAATTCCCATTCTCTCCCCTATTGCTGGCT  
CTGCAGGGCTCTGATCAAGCGGA

>2741

GGTGCTGGGCAGAGAGTGAGGCTTGCCAAGTGAAGGTCCCATGCTGGCCTCTCTCC  
GCCCCGCCCCAGGGTGCCTACGTGTGGCAGTGGCCAGGTGTGCCGCGTGGTACCT  
CTGGTGGCGGGCGGCATCTGCCAGT

>2742

AGGAGGACAGAAACCAAACACCTCTGTAGGGTGGCCTTGCCTGCTTCCCCCTAATGC  
TCACATCTCCAGGGTCGCCGACAGGAGAATGGCTGCCGCGAGACTCTGAGTGCCACCT  
CTGCATGTCCGTGACCACCCAGGC

>2743

TGGAGAGGCCAGGACCACACGACAGGAGATCCTGCAAAGGGACCTCCACAGCTG  
TGTGTCTCCCTCAGTGAAGCAATTTGTGGAGCAGCACACGCCCCAGCTGCTGACCCT  
GGTGCCAGGGGCTGGGATGCCACA

>2744

TTCCCGGAAGAGCTGGGTGTGGGGAGCTGAGGGGGCCAGGCCTCAGCCCTGGTGCT  
GTCCCTGTGACAGGCCCTCGGGGTGTGTGGGACCATGTCCAGCCCTCTCCAGTGATC  
CACAGCCCCGACCTTTGATGAGAAC

>2745

GCTATCACCTGGCTGTGGGTCCCCAGGCAGGACATACACAGTCCCTCTCTGGCCCT  
CATCCTCCTCAGCTGCAAAGGAAAAGCCAAGTGAGACGGGCTCTGGGACCATGGTGA  
CCAGGCTCTTCCCCTGCTCCCTGGC

>2746

CCAGGGCGGCTTGGGGTACGTTTTCCCACCCCAGAGAACCAGGTCCCCGACTGTCA  
CTCCGCCCCGAGTAAGACCTATGGCAACGTGCTGGTGTGGACGGTGCATCCAGTGC  
ACGGAGAGAGACGAGTTCTCCTAC

>2747

GGTCTGCTTCAGGGCCTGGGGGCTCCAGTCTGCCAGGGCCCCTGCCTTGACTGCC  
CCCTCCTCCCAGGTGCTGATCATCGGGGGCGGAGATGGAGGTGTCCTGCGGGAGGTGG  
TGAAGCACCCCTCCGTGGAGTCCG

>2748

CCCACGTGGCTGTGCTGGCTCCAGGTCCCCAGCCCCTTGGCCCAGACTGGTCCCTCC  
CATCCCCTCCAGGATGTCATCCAAGTCTCCAAGAAGTTCCTGCCAGGCATGGCCATTGG  
CTACTCTAGCTCGAAGCTGACCC

>2749

CTGTGTGGGTGACAGTGGCCCTGGAGGTCACAGCCAGACTGTTCAAGTGTGTCTCCCTC  
TGTCTTCCCAGGCCCGCGAAAGTCTTCAAGGAGTCTATTACCAGCTCATGAA  
GACAGCCCTCAAGGAAGATGGTGT

>2750

TGGAGCACTGGGGCGGGGCGGGGTGGGGCAGGGCAGGCCCTGCCGGATGCTGATGCT  
TAGGGGCCCCCAGGCGAGTGCCAGTGGCTGCACCTGGACCTCATCAAGGAGATGCGG

CAGTTCTGCCAGTCCCTGTTCCCCGT

>2751

ACAGTGAGACTCCGTCTCAAAAAAAAAAAAAAAAAAGTGCCCCCCTGATGTGCCCTG  
GCCCCGTCCCAGAGCAGAACTTCCAGGAGCCGGTGCAGCCGCTGACACAGCAGCA  
GGTGGCGCAGATGCAGCTGAAGTACT

>2752

GGCCTGCGGGGCTGGGTGGTGGGACCCAGGGACCCAGAGCGCCCTCCTGACTGGCCT  
CATGTCCCTCCAGGCACTGAATGATGTGAGCTGAGCCAGGCGCCACCACTGATGCCA  
CCCAGGACCTCGGACCTTGGAGCCT

>2753

TGTCGTCCTAAGCCTTCTCTCTGACTGCAGCCATCCCCAGCTACTTTATCTTCCAGTCT  
TTCCTTTAGAGGAGATCATCGGGGGCCATGAGGCCAAGCCCCACTCCCGCCCTACA  
TGGCCTTTGTTGAGTTTCTGCA

>2754

CTGCTCTTACTGCTCCTGGGCTCTATCCCCTGTGACTCCACCCCATCCTCACTCTGCT  
CTCTGTGCAGCTCCATAAATGTACCTTGGGGGCCACAATATCAAGGAACAGGAGCG  
GACCCAGCAGTTTATCCCTGTG

>2755

AGCCCCATCACTGTGTCGGGGCCAGAAGGCCATTGCCTGACCTGGACTTTCTTGCTT  
CTTCCCACCAGCTGGAGAGAAAGGCCAAGTGGACCACAGCTGTGCGGCCTCTCAGG  
CTACCTAGCAGCAAGGCCCAGGTGA

>2756

CACAAAATCCATAACAGAGACCACCCATCCCAGGGAACACTAGCTCAGTCTTTCCTCT  
CTCTGTTACAGGGGGACTCCGGGGGGCCCTCGTGTGTAAGGACGTAGCCCAAGGTA  
TTCTCTCTATGAAAACAAAAAAG

>2757

TTACTGCAACTATTGAGTGAATCTTGTGTGGGCTTTACTCTGTCTTTCTTCTCTCTTT  
GTCCTCCAGGAAATCCACAAGGACCATCCCCACAAGGAGGCAACAAGCCCCAAGGTC  
CCCCACCTCCTCCAGGAAAGCC

>2758

ATTAGAAGTGGTATTCACCATGGCTTCTTCCCTATTATTCTCTGCTTAAATCATTCTTTTC  
TTTTTCCAGGACCAGCCACTGTTGCAGCATGAGTCCCAGCAGCAGAAGCAGCCCTGC  
ATCCCACCCCTCAGCTTCAG

>2759

AATCTGTTTGGCATTGAATTTGTATCCATCTTTCTTTAATTGAATCACTGTGTCAGCTTTC  
TGTCTTAGAAAAAACACATTTGAAGCATGAATTCTCAGCAGCAGAAGCAGCCTTGC  
ACCCACCCCTCAGCCTCAG

>2760

CGCGACCTCCCGCTGCCCTCCCCGCGCGCCTCCCCGGCCCGCGGCCTGACCCGCC  
GTGTCCGGCCAGGATCAACTCGTAGGCTTTACGAGAAGAAGATCTTCGAGTACGAGAC  
CCAGAGGCGGCGGCTCTCGCCCC

>2761

GAGAGCGGCACTGGAGAAAGGGGAGGGAAGTCTGGGGGGCAAACAGTTCTGTCTCC  
TCCTTTCAATCCAGACTTGAATTCGACTAGAGGGGATGCAGATATGTATGATCTTCCCA  
AGAAAGAGGACGCTTTACTCTACCA

>2762



TTCAGATTAGGCCATCAGGCCAGGCGGGCACACCGATGCCCCCTCTCTGACCGTGCC  
CCCCTTCCAAGGCTACAATGACGACTACTATGAAGAGAGCTACTTCACCACCAGGAC  
TTATGGGGAGCCCGAGTCTGCCGG

>2763

GGGGGAGCCCAGGGACGGGCTGGTTCTGGGTCCAGGCTCCTGGCCACTTGCTCCCC  
TCTTTTGCCTCAGGGAACGCCCCATGTACGGCCGGACAGTGCCTACCAGAGCATCAC  
GCACTACCGCCCTGTTTCAGCCTCC

>2764

TCTGTTACCCCTGCCAGGCAGTCTCTTCTAGAACTTGGTTAAATGTTCACTTCTT  
GCTACTTTCAGGATAGATTCTCACCCCTGGCCCGCCTTTGCCACCCTACTCTGCC  
AGAAGTGCAAGAGCCTAAGCCG

>2765

TGTCTCTGGCTCAGGGAGTGTTCATCCAATAAGCTCCCTCAGTGGTTGTCTCACTC  
ATCTCTTATAGATTAACCTTCCAAAATGTCACCATTCTGTATCTGGTTCTCTGGTA  
CTTGGGCTTCATGCTACAAT

>2766

TAATGGAAAAGGTCTTGTTGGTACTGATACCGGTTTAAATAAACACCTCTCTTTTCTT  
GTATTTTAAGCCCAGTGGGCAAATCCTTTTGATCCATCCAAGACAGAAGACAGTTCCA  
GCTTCTTAATAGACAAGACCAC

>2767

AGAGAGAGAAGGAGAGAATCATAAGCTTGATATGGTGATTGCCATGTGTTCCCTTCCTC  
TTTTCCACAGATGGGTTGACTTGTGTTTCCAAAGTTTTCCATTTCTGCCACATATGAC  
CTTGGAGCCACACTTTTGAAG

>2768

TACTTCTAGACCTCCCAAAGACTGTTCTGTTTCTTTCAGAGACCCGCAGGATTTGTT  
TCCCCACACAGGCTGCCATAAGGCTGTGCTGCACATTGGTGAAAAGGGAAGTGAAG  
CTGCAGCTGTCCCTGAAGTTGAAC

>2769

GTGTGTGTGTGTGTGTGTGATGAGTACAAGTGTTCCTCATCCTGTTCTCAACTTG  
TGTCTCCGCAGATCACACAGGTGCTGGAGTCTCCAGACCCCCAGTAACAAGGTCACA  
GAGAAGGGAAAAGATGTAGAGCT

>2770

TGTTTCTTTTGATCACTCTCAATTTTATGTGGCCTAAAATACAGACTCCATGAATTGATT  
GTCGTTAAGGGCTGGGCCATCAGGAATTTGCTCGTCCATCTCGGGGATACCTGGCCTC  
AGAGATGACAGCATTGGCC

>2771

TTCGCTTACAGGAATTGCCCTTGCACTTTTCCATCCCTACACCTCAGTCATTCTGTTCTT  
ACCTTTCAAGGTAAGGAGCTAAACAGAACCTGCTGCCTGAATGGGGGAACCTGCATGC  
TGGGGTCTTTTGTGCTGCC

>2772

TGGAGAGGAGAGAGAAAAGGGAAGTGGAATTTTCAGACCCAAGCTATCGCAGCTTACC  
TGTTCACTCAGGAAGTGTGGTCTGTGCCCCATGACACCTGGCTGCCAAGAAGTG  
TTCCCTGTGTAATGCTGGCACGGT

>2773

CACATTTGTGGGCAGCAGGATGAACTGCCAGAGAGGTTTGCTTTAATGACCAAGCATC  
CCTACCTTCCAGATGGCCTTGTGATGGATGAGCACCTCGTGGCTTCCAGGACTCCAGA

ACTACCACCGTCTGCACGTACTAC

>2774

GTTTTATACATCAATACATTTCGAGTGCTCTGAAGTGCATGTAATAATAGCTGTTTCTCTG  
TTGTTTAAAGGCACTACAAATACTGTGGCAGCATATAATTTAACTTGGAAATCAACTAAT  
TTCAAGACAATTTTGGAGTG

>2775

AAGCAGTCTATCTTGTGGGTGCAAATTGTAACATTCCATTTATGTTTCTCCTTCTTTTC  
TTTCTTTAGCACTAAGTCAGGAGATTGGAAAAGCAAATGCTTTTACACAACAGACACA  
GAGTGTGACCTCACCGACGAG

>2776

GATAACAAAACAGGATTTGACTTTGTACAGAATTCTTTGGTTCCAACCAAGCTCATTTTC  
CTTTGTTTCAGCAAACCTCGGACAGCCAACAATTCAGAGTTTTGAAACAGGTGGGAACA  
AAAGTGAATGTGACCGTAGAAGA

>2777

ACAGTGACTTAATAAAGGGGAAAGAATTGACTCAGAGCCCAGATGAATTAAGAACTCT  
ATCTTTTTACAGAAAACAGCCAAAACAACTAATGAGTTTTTGATTGATGTGGATAA  
AGGAGAAAACACTACTGTTTCAGTG

>2778

CCGTCAATTTTGTCCACTGATAATGGGATTTGAGCTCTCCAAGTTGACTAGATGCCCT  
TTATTTTTACAGAAATATTCTACATCATTGGAGCTGTGGTATTTGTGGTCATCATCCTTGTC  
ATCATCCTGGCTATATCTCT

>2779

ATGCCCCCAGATGGCCAAGACTGCCTGTTCTGAGGTCGCTGTTCCATGACCCCCCA  
CCGCCTTTACAGTGTTCTGGCTCCTCAGCAAGCACGGTCGCTGCTCCAGCGGGTCCG  
GCGAGCCAACACCTTCTTGAGGA

>2780

AGACAACCTTGCAGGGAGAGAGGAAATAAGTCCCCAGGCTCCAAGGCTGACCGGGGT  
GGGGTCTCCGAGGTAAGTGTGCTGAGGGTCTGGGTACGAACTACCGAGGGCATGTGA  
ACATCACCCGGTCAGGCATTGAGTG

>2781

ATGGGCTGAGAACAGGGAGCAAGCGTACCTCAAGTTCAACAGCCTCCTGTTGGGCAA  
TTTCTCTTCCAGAATCAACTCCACTACCCATCCTGGGGCCGACCTACAGGAGAATTC  
TGCCGCAACCCCGACAGCAGCACC

>2782

ACACCCCTGTCTGTTCCGGTCCATGTGTGGTCTCACTCACTCTGCTGCCTCCTTGCCCC  
TCACCCACCAGGCCAGGATCAAGTCACTGTAGCGATGACTCCACGCTCCGAAGGCTCC  
AGTGTGAATCTGTACCTCCATT

>2783

ACTGGGGGGATCTAGGGGATGGGTGAGGAATGGCCAGCCAGTCCCGGCCGGTGCC  
TGGGTCCAACAGAGGAGGCCGTGGAGGAGGAGACAGGAGATGGGCTGGATGAGGA  
CTCAGACAGGGCCATCGAAGGGCGTAC

>2784

ATCCGAGGGGATGCGGGGCTGCGGGGCTGGTGGCCAGGACTTGCCCCTCACTGCTTG  
GCTTGCTCTGCAGACTGTGGGCTGCGACCTCTGTTTCGAGAAGAAGTCGCTGGAGGAC  
AAAACCGAAAGAGAGCTCCTGGAATC

>2785

TACTTCTAGGGCTGGTGTAGAGGCAGCCCCCTCATCCTCAGCTCCTAATGCTTCCTGCT  
GCCCCCTCCAGGCAGGTGATGCTTTTCCGGAAGAGTCCCCAGGAGCTGCTGTGTGGGG  
CCAGCCTCATCAGTGACCGCTGG

>2786

GGCAGGCAGTTTCTGCTCCTTGCTGGGTGAACCTGCAGCTTCTCCATTTCTTTCTTGG  
GGTCTCTGCAGGTACGAGCGAAACATTGAAAAGATATCCATGTTGGAAAAGATCTACA  
TCCACCCCAGGTACAACCTGGCGG

>2787

GAAATGGCGTTGGGGCCAGGCGGCTCCTGTGGGGGTTGGCTCTCACTAGGCCCTTCTT  
CCTTCCCCAAAGCTTGCTCCAGGCTGGATACAAGGGGCGGGTGACAGGCTGGGGCAA  
CCTGAAGGAGACGTGGACAGCCAAC

>2788

GTGTCTCGTGAAGGGGCGTGGCTGGGCTATGAGCTATGCTCCTGAGCACAGACGGCTG  
TTCTCTTTCAAGGTTACAAGCCTGATGAAGGGAAACGAGGGGATGCCTGTGAAGGTGA  
CAGTGGGGGACCCTTTGTCATGAA

>2789

TTGCTGGCAGAGGAATACTGATGTGACCTTGAACCTGACTCTATTGGAAACCTCATCT  
TTCTTCTCAGAGCCCCTTAACAACCGCTGGTATCAAATGGGCATCGTCTCATGGGGT  
GAAGGCTGTGACCGGGATGGGA

>2790

TCTGTTACCCCTGCCAGGCAGTCTCTTCTAGAACTTGGTTAAATGTTCACTCTTCTT  
GCTACTTTCAGGATAGATTCTTACCCTTGGTCCGCCTTTGCCCCACCCTACTCTGCCCA  
GAAGTGCAAGAGCCTAAGCCG

>2791

GGGAATTCCTGGAATACCAGCTGACAATGATTCCTCCTCATCTTTCAACCTCACCTCT  
CCTCATCTAAGAATTGCTCCTCGTGGTCATGCTTCTCCTAACTGCAAGGCTAACGCTGT  
CCAGCCCGGCTCCTCCTGCTTG

>2792

CCTGCTTATTAGGCTACCATAGCTCTCTATTTACAGCTCCCTTCTCCCCCACCAATCTT  
TTTCAACAGAGCCAGTGCCAGAGGTTACCCTTTGCCTACACCTGTCCTGCTGCCTG  
CTGTGGACTTTAGCTTGGGAG

>2793

CTAAGGCTCCCCACCCGCTTTTAGTGTGCCCTTTGAGGCAGTGCCTTCTCTTCCAT  
CTCTTTCTCAGGAGGAGACCAAGGCACAGGACATTCTGGGAGCAGTGACCTTCTGCT  
GGAGGGAGTGATGGCAGCACGGG

>2794

TCCTACTTAGACAAGGGAGGCCTGAGATCTGGCCCTGGTGTGGCCTCAGGACCATC  
CTCTGCCCTCAGCTTCTCCACAGGGCAGGACCACAGCTCACAAGGATCCAATGCCA  
TCTTCTGAGCTTCCAACACCTGC

>2795

CACTTCAGGTGGGTGGGAGGCCCTGTGCCGAGGCCCTCCAGTTTGAAGGAGGCA  
CTGCTGGTGCCAGTCTTGAGGTCTCCGAGGGCAGAAGGTGACCAGCCTAACGGCC  
TGCCTAGTGGACCAGAGCCTTCGTCT

>2796

GCCTGTGCCTGCTGAGTCTGATCCGTCTTCTTCTACCTGCCCCCGGCCCTTC  
TCTTTCTGCAGACAACTGGTCAAGTGTGAGGGCATCAGCCTGCTGGCTCAGAACACC

TCGTGGCTGCTGCTGCTCCTGCT

>2797

TGTTGGGGAGGGGTCTCCTTCTCCACTCCTCCCGCGTGGACCTCACCTGACCCTCT  
CTCCTCTTGACAGACAGAGTTGATGAGACGCGTCCGTGCTTCCAGATTGCTCAGTAC  
AAGTGCCTGGTGATCAAGTATGCC

>2798

ATTCCCTGGCCCCTGCATTGTGGCTTCTGGCCTCCCTGGCCCTGCTCACGCTCTGGCTT  
TCTCTTCCAGGAACACCATGGAGGCGCTGCCCGCCTGCCTGCTCCGAGACGTGGCCC  
AGGAGGCCCTGGGCGTGGCTGTC

>2799

TCGCTGGGGCTCCAGGGAGCTGCTGCTGGGGTGAAGCTCTCACACTCTTTCTCCACG  
TGCCCTTTCCAGTTCCCTGACATCATGGAGTTCTGCGAGGCCATGGCCAACGCCGGGA  
AGACCGTAATTGTGGCTGCACTGG

>2800

TCAGAGGGTTTAAAAGAAAAACCCACCTGGTAAGGTGCTGAGCGCCCTCTGTCTTTCC  
ATGGGAGCACAGCCATTTGGGGCCATCCTGAACCTGGTGCCGCTGGCCGAGAGCGTG  
GTGAAGCTGACGGCGGTGTGCATGG

>2801

GCGGGGTGGGGTATGGCTCTGCCTCCTTCTGTCTGGCCCTTCAACCATCCCCTGTC  
CCTGCGGCCAGGTCGAGGTGATTGGGGGAGCAGACAAGTACCACTCCGTGTGTCGGC  
TCTGCTACTTCAAGAAGGCCTCAG

>2802

GTTGGGGGGGGTAGGTGTGAGGCTGACAGTCCAGCAGGCCTCACCTCTGCCCTCTG  
CCCTCCCTCGCAGAGTTCAAGGCTGCCTTTGACATGTTTATGCTGATGGTGGTGGGG  
ACATCAGCGTCAAGGAGTTGGGCAC

>2803

GAGGCAGGGGATGGTGGGGAGAGGCGGCAGCGGCTGGGCTCAGGCTCAGTCTGCCA  
CCTGCTGCCCCGAGGCAGCGCACCATCGACTTCGAGGAGTTCTTGGTCATGATGGTG  
CGCCAGATGAAAGAGGACGCGAAAGG

>2804

GGGCGTCGAGTGTGGTGGCCAGGGCAGCTCGCCCCGGCCCTGAGCCCTGCCCTGTCC  
CTCGGACCCGAAGGAATGCAGACGGCTACATCGACCCGAGGAGCTGGCTGAGATTTT  
CAGGGCCTCCGGGGAGCACGTGACG

>2805

GGCTGGAGCCCTGGCCTGGCCTCTGCGTCCCCAGTGGGACCCCTGACCCTCTCCCTCT  
CCTTTCCCTCAGAGTTCTGAAGATGATGGAGGGCGTGACGTAAGGAGTGGACAGTCG  
CCTTACCAAGATCGCGTGTCCCT

>2806

ATGGGGGCTGCTGGGGTGGCTCAGCCAAACCTTGAGCCCTAGAGCCCCCTCAACTCT  
GTTCTCCCTAGGGGCTCCCTGGTGTGGCCTCACACCTTCAGCTGCCAGACTGCC  
GTCAGCACCCCAAGATGCATCTTG

>2807

TTCTCAGGGATTGAGACCTCTGATCCAGACCCCTGATCTCCACCCCCATCCCCTATG  
GCTCTTCTAGGAGACCCAGCAAGCAGAACTCACTGCTCTGGAGAGCAAACACGGA  
CCGTGCCTTCTCCAGGATGGTTT

>2808

AGGGCCAGGATGTGGAGAGTGAACCGACATGGCCCACTGACTCTCCTCTCCCTCTCT  
CCCTCCCTCCAGCAAACCCTCAAGCTGAGGGGCACTCCAGTGGCTGAACCGCCGGG  
CCAATGCCCTCCTGGCCAATGGCGT

>2809

GGTCAAGGAGGTCACTGACTTCATGAAGTGCTCAGCTATTAAGGTTCTTTCCCACTC  
TTATCCCTTAGGATGGAAATCCAATAATGAGACCGCACTCCTTGCTTGTTCCTGCGT  
GTTTCACCCAAAGGAGAAAATG

>2810

CTTATCCTCCTCTGTTGCCATCATGGACCTCTCGCACCCCGTGATCAAGCTGTTTTTCT  
CTCCTTCCAGAATTAAGGGACGCTGTGAAGCAATCATGGATGCAATGAAGAGAGGGC  
TCTGCTGTGTGCTGCTGCTGTG

>2811

AGGTGCAAGGGTAGTGAGGCATTTCAATTTGAGTCATACTCTGATGAGGCTGGCCTGTC  
TTTTCTCATAGTGATCTGCAGAGATGAAAAACGCAGATGATATACCAGCAACATCAGT  
CATGGCTGCGCCCTGTGCTCAG

>2812

CTCCTGGAACCATGGCCTGAGCACACAGAAGGAGGCTGTCATTAGGGGCTTCCTTTTT  
TATACTTGACAGGTTGCAGCGAGCCAAGGTGTTCAACGGGGGCACCTGCCAGCAGG  
CCCTGTACTTCTCAGATTTGCTGTG

>2813

AGGGGAGCCTCCTGAGGGCTGAATGAAAGGGGACTCCCATGTGAGGCATCCATGCCCT  
GCTCTCTGTAGATAACAGGGCCACGTGCTACGAGGACCAGGGCATCAGCTACAGGGG  
CACGTGGAGCACAGCGGAGAGTGG

>2814

AGTCCTTGGGTCTAAAGGAGAGGCTTACCTTTGACCTACCCTGGCCCTTCCCTTGG  
CTGATTTTTAGAAACCCAGATCGAGACTCAAAGCCCTGGTGCTACGTCTTTAAGGCG  
GGGAAGTACAGCTCAGAGTTCTGC

>2815

CAAGCCCCAGCCCTGACTTGCGTGCTTCAGAATTTGTTTTGTTTCAGTTTGAGAATTC  
TTTTCTTCTAGGAAACAGTACTGCTACTTTGGGAATGGGTACGCTACCCTGGCACG  
CACAGCCTCACCGAGTCGGGTGC

>2816

AGACCCCATCTCTACAAAAATTAATAAAGAAGATAAAAAGGAAACCTTAACTCT  
CTTATCATTTAGGAATCCTGATGGGGATGCCAAGCCCTGGTGCCACGTGCTGAAGAACC  
GCAGGCTGACGTGGGAGTACTGT

>2817

CTCCTCACTCTACCTACACACGTGCAGGAGGCCTGTGGGACTGACTGCCTCCTCGTCC  
TTTCTCCCCAGCCACCTGCGGCCTGAGACAGTACAGCCAGCCTCAGTTTCGCATCAA  
AGGAGGGCTCTTCGCCGACATCGC

>2818

GCCTAGAAACCAAGCCCTTTAGGGGAAATCCACAGCAAAAAAAGCATTCTAAGGCT  
GTTTCTCCACCAGTTTCCGCCACCACTGACGGTGATCTTGGGCAGAACATACCG  
GGTGGTCCCTGGCGAGGAGGAGCAG

>2819

CTCCTGCGTGTTCCTCCCTCCCGGGACGCGGCCCTCACGCCAGCTCACTCCTCCTTT  
CTCCCTCCAGCGCTGCTGCAGCTGAAATCGGATTCGTCCCGCTGTGCCAGGAGAGC

AGCGTGGTCCGCACTGTGTGCCT

>2820

TTGGCTTTCTCTTTCAAAAACGTTTATAAATAACTTTCCCTAAAACCATATGATGGTTCT  
CCCCTTTTCAGTGTCTCCTTTCTATTTCGGAGCGGCTGAAGGAGGCTCATGTCAGACTGTA  
CCCATCCAGCCGCTGCACATC

>2821

CTACACATACTGACTTTCTCCAGATAGTCTGCTTTTTTTGCAAACGCCAAACCTGCTATC  
TCCTTTGCAGGGCGATTTCGGGAGGCCCTGGTGTGTCTGAACGATGGCCGCATGACT  
TTGGTGGGCATCATCAGCTGGG

>2822

GCTGCAGGCCAGGGAAGGGGGAGGCTCTGGAGCAGTCGGCCTGAGCCTGATAGAGAG  
GGGCCTTCTCCAGGTGTCAGGGACGTGGTATCTGAAGGCCATGACGGTGGACAGGGA  
GTTCCCTGAGATGAATCTGGAATCGG

>2823

CAGCATGGTTGCTCCAGGGCCGGGGGAGGCACAGCCAGGGCCGCTTTGCCAGGGGGC  
TTCTGTTTTCCAGGATAAGTGGCCGGTGCCAGGAGGTGAAGGCCGTCCTGGAGAAA  
CTGACGAGCCGGGAAAATACACGGCC

>2824

CACGCTGTCCCGGATCCTCTCTGAAGTCCCTGGTGCTAATTCAGGAATGTGCTGCTG  
TCTTTCTGCAGACGGGGCAAGCACGTGGCATAATCATCAGGTGCGACGTGAAGGAC  
CACTACATCTTTACTGTGAGGG

>2825

TCCAGACTGGGATGGGGTGCCGTCGGCCAGTGTGCCTCGAGCACCCACATCTCGTCC  
TGGCACCCACAGGCAGAGACCCCAAGAACAACCTGGAAGCCTTGAGGACTTTGAGA  
AAGCCGCAGGAGCCCGCGACTCAG

>2826

CCCCACATTGCATCCCCCTCCCACCCTTGCTGTCTGGCCTCACTACCCTCCCCCCT  
TTCCAGGGCAGGGGACACCTTGCTCCTCAGCAGCCCAAGGACGGCACCATCCAGCA  
CCTCCGTCATTCACAGGGACATGG

>2827

ATAGTGTGAATGAAGCCTTCCAAAAGCAGAAACGGGATTTTGATTCTGGATCTTATTT  
TATTGTTCTAGTTTACTTGAACCTGAAGGAAAGAAAAAATGTCTCCACTTCTGA  
GAAGCATCTGTGACATCACTGAA

>2828

CATGTGTGAATATAATTTTACCACCTGTAAATAGTGCATTGTAAAATTTTGTTCACC  
ATTTTATAGAGACCACATGACCCTAAGACGGTAGATCTGATCCTGGAACCTCTGGATCG  
TGACAGTAATGGGCGTGTCG

>2829

CAGGGTTCTGGCCCTCCGTGGTCTGGCTGCTGAGCCCTGACTACCGTGCCCCCAAC  
CCCTGAACACAGAGTTCAAGGCAGCCTTCGACATCTTCGTGCTGGGCGCTGAGGATGG  
CTGCATCAGCACCAAGGAGCTGGG

>2830

GGTTCGTGTCGAAGGTGCTGCCTGCAGTACCTACCCTGGCCTCTGTAACGGCCATGCT  
GCCACCCCCAGGCAGCGGCACGGTGGACTTTGATGAGTTCCTGGTCATGATGGTTTCG  
GTGCATGAAGGACGACAGCAAAGG

>2831

GCCTCCTGGGGCATGGGTGGGGCTGCCTCATGCCCTCCCCACAGCCCTACCCTGAGCC  
CCCTCCCCACAGAAATGCTGATGGCTACATCGACCTGGATGAGCTGAAGATAATGCTGC  
AGGCTACAGGCGAGACCATCACG

>2832

GGGCTGATCTCCTGCCTCCATGCCCTGCCAGCCCCTACCCTCAACCCACACCTGCCCC  
TCTTTCCACAGAGTTCCTGGAGTTCATGAAGGGTGTGGAGTAGATGCTGACCTTCACC  
CAGAGCTGCCTATGCCAGCCTC

>2833

CTTCTGTTGCAGAGCGCATGCATTTTGACCACAGTGTTCAGCTCTTCCCTTTTCTTTG  
TTCCATTTAGGTGGCTTCCCACACTTCTGACTCGGACGTTCTTCCGGTGTCACTGAGG  
TGGTCGTGAAGCTCTTTGACT

>2834

AGTTACGGGGGAATTTATTTTCTTTGGAGGATGTTTTACTTTGGAGGATAACTGTTT  
TTTATTTACAGGGAGGAGTGAGATGTGGATGTTGCTTTTGCACCTACGGGGGCATCTGAG  
TCCAGCTCCCCCAAGATGAG

>2835

TTCCCTGAAGAAAGTTGGATGGCATGATCTGTCTTCCATCTTGAAACCGTATGGCAA  
TTGTTTTTACAGATGAATTCCTCTGCTGACAACCAAACGTGTGTTCTGGAAGGGTGT  
TGGAGGAGTTGCTGTGGTTTAT

>2836

CTCGGGGGGATCAACTGAGATGGCTTAAGATTTACCTGGATGCCTGCTCTGCTCTCCCC  
ATCTCTTCCAGGGATCCACAAATGCTAAAGAGCTGTCTTCCAAGGGAGTGAAAATCTG  
GGATGCCAATGGATCCCGAGACT

>2837

CCTCTAAGGCCATCTCATGACATGTGTGATTAATGTATGTACCTGTCTCTCTTTTGGAC  
AATTCTACAGATTATTCAGGACAGGGAGTTGACCAACTGCAAAGAGTGATTGACACCA  
TCAAAACCAACCCTGACGACAG

>2838

TTTTACTTTGCCTTTAGCTGTGGTCTTCAAACCACCATCCCTCCTTATCTTCTCTGCT  
GGTTCCTCAGATCTTCTCTGATGGCGCTGCCTCCATGCCATGCCCTCTGCCAGTTCTAT  
GTGGTGAACAGTGAGCTGTC

>2839

TCTAATGTTTTAAATGATGTTTTAAAGAATTGAAACTAACATACTGTTCTGCTTTCTCC  
CGGTTTATAGCCAGGTGACTTTATACACACTTTGGGAGATGCACATATTACCTGAATCA  
CATCGAGCCACTGAAAATTC

>2840

CACGGACATGAGGAGCAATTACAACAGGTCGTACAATTATGGCAAATAATGGCCTTAT  
TTGTTTTTAGCTTCAGCGAGAACCAGACCTTCCCAAAGCTCAGGATTCTTCGAAA  
AGTTGAGAAAATTGATGACTTCA

>2841

GCGGACGCGTGGGCTTCGCCGTCTGGGGGCCGCGGGCTCAACCCTTGCTCCCACCCCT  
CCGCGCGGCCAGGTGCCAGAGGACGAGCTGGTGTCCACGCTGAAGCAGCTGGTCTCC  
GAGAAGCTGAACGTCCCAGTGCGCC

>2842

GGCGCCTCGCGCCCCGGGCCACCCCCACGGCGGTGGAGGAGGAGGAACCCATCGAT  
CTGTCTTTGGCAGATGGGAAACGACTCTCGGATTATAGCATCGGGCCCAACTCCAAGC

TCAACCTAGTGGTCAAACCCCTGGA

>2843

CTACCTCTGTTGCAGTGTATGCCCCCCCCCACTGGCAGCCCCTGAATCTTCCTGCCCT  
TCTCTCCCAGGATTACGAGAGGTCCCTGAGTCGCCTGACGCTGGACGACATCGAACG  
GTTGGCCAGCCGCTTCCTGCACC

>2844

CGGGAGGCAGGCCTGAGTCCCCCTGCACAGCACCCCTCTAACCAGGCCCTCTTCCCG  
ACTCTGCCAGCTGTGCCTGGGCATCCCTCTCTGCCAGCCTGCCAGCAACAGCAG  
CCAGGAGAGGCCACTGGACACCCG

>2845

TGGGCTTGCCGCATGCCCTGTGCCCCACCAGCCATCCTGAACCCAACCTAGATCCTC  
CACCTCCACAGGGGCGCCCTTTGTGCTACTCATGTTGCTGGCCAGCCTCAACAGCTGC  
ACCAACCCCTGGATCTATGCATC

>2846

ATACATGTACATGTAACATAATTCATCAAAAGGGGACACATACAAATTTTTCTATTTCT  
GCCTCCTAGGCCGGGATTATGAAAAGAATAAAGTCTGCAAGGAATTCTCCCATCTGGG  
AAAGGAGGACTTCACATCTCT

>2847

GAGCGAGACTCCGTCTCAAAAAAAAAAACCTTTCAGTTCTAATTGATATATTGTCTTAT  
TTTCCCTCAGGTCCTAGTCTGTACAGTAGAAAATTTCCAGTGGCACGTTTGAACA  
GGTCAGCCAATTGTGAAGGAA

>2848

TATTAATGGAAGTCTAAAAGCCTGGAAATTTACATATATATATGAGTTTCCTTTTTCTT  
CTCCTCCAGACCTCAGCACTGTCTGCCAAGTCTGTGAAAGTAATTCTCCATCCCCGT  
TCACCCAGGCACTGCTGAGT

>2849

TGTCTCAAATAAAAAAGTAGATTTTGTATTACAAAATTTTTTGACCAATTCTATTTTTT  
CCTCCACAGATTTATGTGGGAATTTCCACTAATTACGGACAAGCTCCTCTGTCACTTTT  
AGTCAGTTACACCAAGAGT

>2850

TATTTTTGCCATTTATACAGTATTCAATGAGTCTTGACCATATAATGAGATTCTTTCACCT  
GTTTTCTAGAGACTCCAGCTTAAACATTTATCACTTCTCACCCTCTGTCAAATAGAGT  
CTGCTCACAATATGCTGCTT

>2851

GTGCGTTCATCACGAAACCAAGAAAAGTCTGAGAATGTTGATAAGCTAACATATTTATTTT  
TAACTGTTTAGCAATCTCATAAAGTTAGCCCCAAAAGTGCCTACTGCTGATCTGGAGGA  
TGTTTTGCCACTAGCTGAAGAT

>2852

TATGTAATTCTTATTTTTAATTAGACTATCAGGAAACTAACAAATGCACAACTAACCAATT  
CGTTTTGTAGCTGCCTGAACACACAGTAAAAGTCTGTGACAATTTATCCACAAAGAATT  
CTAAGTTTGAAGACTGTTGTC

>2853

AAATAAATAAATAAATAAATAAATAAATAGGAAATATATAACACATATCTCCTTTTCTCCC  
TCATGCTAGGTATACATTTGAACTAAGCAGAAGGACTCATCTTCCGGAAGTATTCCTCA  
GTAAGGTACTTGAGCCAACC

>2854



GATTTAATGGCTTGATGGGACAAGGTTTCAAGACAAATAATTTTGTATGCAATTATTGT  
TTTCTTACAGGGCCCTCTACTAAAGAAGGAACTATCTTCTTTCATTGACAAGGGACAAG  
AACTATGTGCAGATTATTCAG

>2855

TTATTTTGCATTAGAAATTTGTATAAAATAAATACATGTAGTAAGACCTTACATTTAAATG  
GTTTTTCAGACTGGCAGAGCGACTAAAAGCAAATTCCTGAGGCCACACCCACGGA  
ACTGGCAAAGCTGGTTAAACAAG

>2856

GAGCAATATTATGGTTGTGCCCATTAGCTCTGTTTTTCTAACATAAAATTCATTTCATTA  
TTCTCATAGACCAGAGTTGGAGCCACCCAGGGGAATGATCTCTGATGACCTAACCTAA  
GCAAACCACTGAGCTTCTGG

>2857

TCGCTGCGTTCCCCTCCAACCCCTCGACTCCCGGCTCCCCTCCTCCCGCTCACCCCGCC  
CGTCCCCGAGTGCTCCCCTGCGGCCCGGGGGCAAAGCCGCTGCTTCGGGCCCA  
GCATCTGCTGCGCGGACGAGCTGG

>2858

AGGGTGTGGGCCCCCGCACCCCGAGCTGCGCCCCGCCAGGCGCCCGTGCTCACAC  
GTCCTCCCGCAGAGAGCTGCGTGACCGAGCCGAGTGCCGCGAGGGCTTTCACCGC  
CGCGCCCGCGCCAGCGACCGGAGCAA

>2859

TCCAGAAAGCTATAAATCCAAGCTGGCTTCTCCCTCCCCACACAGCTGCTCCTGCTCT  
CCCTCCTCAGGTACCCAGCCATGAGGATTATCGCCCTCCTGCTGCTATTCTCTTG  
GTAGCCCTCCAGGTCCGGGCAG

>2860

TCCAAGATTCCCTTACCACCCACCGCTGACCTTGGTGCTTAATTTCTCAGTCTTCTCT  
GTGTTCCAGGCTCAACAAGGGGCATGGTCTGCTCTTGAGATTAGTATTCTGCCGGCG  
AACAGAACTTCGTGTTGGGAA

>2861

ACGTAATTTACCAGGCATGGGTTTTCCAGAGGAGGGGGCTGGTTCATGGTTTTGGTTT  
TGTTTTCCAGAAGATTTGTGATTCAGGCAAAGGCTGACTGTTACTTCACCAACGGG  
ACAGAAAAGGTGCAGTTTGTGGT

>2862

TCCCTAAAGAATCTCCTGTCCCAGCTTGGTGGTTTTCTTTCACGGTGTCTCATTTTTCT  
CCCTTCTAGTGCAACCAGAGGTGACAGTGTACCCAGAGAGGACCCCACTCCTGCACC  
AGCATAATCTGCTGCACTGCTC

>2863

TTCTGGGATTCCAAGAAAGTGCTTTAAATATTGGGATATTTTACTAATTTAAAGACCTG  
TTCCCATAGGAGCTCAGTCTGAATATTCTTGAGAAAGATGCTGAGTGGCATTGCAGC  
CTTCTACTTGGGCTAATCTT

>2864

CCTGAGTCTCTGGAACGGCTGTGGGGGGTGGTGAGGCTGCCTCCTGAGACCTTCATCA  
CTGTGCCTCCAGGTCTCAAGAGCTGTTCTGCTCCCTCAGTCATGCTAAGTCTCACTG  
AAGCTTCTCTCTGAGCCTGA

>2865

GGGGGCGCAAGACCCGGGAAGCCGCGCCGGGAGGAGGGTCGGGCGGGTCTCAGCCA  
CTCCTCGTCCCCAGGCTCCCACTCCATGAGGTATTTCTCCACATCCGTGTCCTCCGGCCCCG

GCCGCGGGGAGCCCCGCTTCATCGC

>2866

AAAATCCCCCGGGTTGGTCGGGGCCGGGCGGGGCTCGGGGGACTGGGCTGACCGCG  
GGGTCGGGGCCAGGTTCTCACACCTCCAGATGATGTTTGGCTGCGACGTGGGGTCGG  
ACGGGCGCTTCCTCCGCGGTACCA

>2867

CCACATGCATGCTGGTGGAGTGTCATGACAGATGCAAAATGCCTGAATTTTCTGACT  
CTTCCCGTCAGACCCCCCAAGACACATATGACCCACCACCCATCTCTGACCATGAG  
GCCACTCTGAGATGCTGGGCCCT

>2868

AGGGAAAGCAGGAGCCTCTCTGGAGACCTTTAGCAGGGTCAGGGCCCTCACCTTCC  
CCTCTTTTCCAGAGCCATCTTCCAGCCCACCGTCCCCATCGTGGGCATCATTGCTGG  
CCTGGTTCTCCTTGGAGCTGTGAT

>2869

CCCCACACAGGGAAGGGCTGGGCCAGGCCTGGGGCTGCTTCTGGTCTGACCTG  
GCACCTGCCCCAGCCCCAGGCCAGCCCTGCAGCGAGTGGGCATCGTCGGGGGTGAG  
GAGGCCCCAGGAGCAAGTGGCCCTG

>2870

ATGTGAGCCCTGGCTCCCGGGTCTCCTGGGGGCTGCCAGGGCCCTGAGTGGGATCC  
TCCGCTGCCAGGGACGTCAAGGATCTGGCCGCCCTCAGGGTGCAACTGCGGGAGCA  
GCACCTTACTACCAGGACCAGCTG

>2871

GGTCCCTCTGGGCTCCAGGTGGGGTTGCCGGCCCCCTCTGAGGCTGCACCCTCTT  
CCCCACTGCAGAGCGCCTCCACCGCCATTTCTCTGAAGCAGGTGAAGTCCCAT  
AATGGAAAACCACATTTGTGACGC

>2872

CCCCGCCCCCGCCCCCAACCCCCACTCCCAGGCCTGTTGGGCGAGCGCTGACCTC  
TGACCTTCCCAGGGCGACTCCGGAGGGCCCTGGTGTGCAAGGTGAATGGCACCTGG  
CTGCAGGCGGGCGTGGTCAGCTGGG

>2873

CAGATGCCCAATGGGCTGCCTGGCATCTCCACACTGCTGTCCCTGGACACATACCTT  
TTTCCCCCAGACATTATCCGGCAGCCCTCTGAGGAAGAGATCATCAAATTGGCTCCCC  
CACCGAAGAAGGCCTGAGCAAG

>2874

CGTTTTTGACAGTTTGACAGTTAAAGGCATTTCCCTGTGAAATAATACTGGTATGATTT  
AACCATGCAGATCCTCAGTTTGTGGTCTGCCAGCTAAAGGTGAAGATATATTCCTCCAA  
TTCAGGACCCACACGACGGGA

>2875

TAAAAAATAAAACATCATTAAATTAATATGTCATTTCTTTTCTTTTCTTTTTTTT  
TTTTTTAGGACAAAATGTTTCACTTTTGGGTAAATACATTCTTCATACCAGGACCAGAG  
GAAACCTCAGAAAAAGTAG

>2876

AAATATATTTCACTAAATAGTTAAGATGAGTCATATTTGTGGGTTTTTCATTTTAAATTTT  
TTTCTCTAGGTGAAGCTGTACTTCACAAAAACAGTAGAGGAGCCGTCAAATCCAGAGG  
CTAGCAGTTCAACTTCTGTAA

>2877

AACCAACCAGGAGGCTGGGGTACGCTGGAGAAGGAATGGGCTTCCTAACCTTGAGCC  
CTCTTCCTGAAGATATATGTATCTACGGGGCCTGGGGCTGGGCGGGCTCCTGCTTCT  
GGCAGTGGTCCTTCTGTCCGCTG

>2878

CCCACCCATCCATCTATCCCTGCGGCCCCCTCTGCCGCTCCTCTGACCAACACCTGC  
TTTGTCTGCAGGCACCACAGTGTGTTGCCCTGGTCATTTTCTTTGGTCTTTGCCTTTT  
ATCCCTCCTCTTCATTGGTTT

>2879

CACGTAGAATAAAGAGGGGCCGGGGCTGGTTTTTCGCTGCCGCACTAATCTGCGCCACCT  
TCTCTTTTCAGGGGGAGCTTGAAGGAATACTACTAAGCCCCTGGCCCAAACCCAA  
GCTTCAGTCCCCTCCAGGCTTCA

>2880

GCGGAGGGCGCGGGATGCGGGGCGGGGCTGGGGTTGCCGCCGAGGCTCACCGGCC  
CGCGTCCCCGAGCTGATGACCCCGCAGCTGTACGCCGTGGTGGAGAACGTGCCCC  
CGTTGCGCTGGAAGGAATTCGTGCG

**Online Supporting Information  $S_2^-$  represents the negative dataset composed of 2800 false splice acceptor site sequences.**

>1

CATTCTGGATGATGCAGCGAACAAATCCTCTCTACTGTGTCTCATTTCATGTCATTTCGTC  
TCAGCTGAAGGATGAAAGAGATTGGCAAGGAAGCAGGAATGAGTCAGCTTTGGGGGA  
ATATTACCTGGTGGCTCCCATCA

>2

ATGATGCAGCGAACAAATCCTCTCTACTGTGTCTCATTTCATGTCATTTCGTCCTCAGCTGA  
AGGATGAAAGAGATTGGCAAGGAAGCAGGAATGAGTCAGCTTTGGGGGAATATTACCT  
GGTGGCTCCCATCATTTATTGC

>3

CTCTCTACTGTGTCTCATTTCATGTCATTTCGTCCTCAGCTGAAGGATGAAAGAGATTGG  
CAAGGAAGCAGGAATGAGTCAGCTTTGGGGGAATATTACCTGGTGGCTCCCATCATTTA  
TTGCTTTAGGACATACCCTTTT

>4

GGCAAGGAAGCAGGAATGAGTCAGCTTTGGGGGAATATTACCTGGTGGCTCCCATCAT  
TTATTGCTTTAGGACATACCCTTTTACCTACTTGCTATCATGCTGGACCTCAGCATTTC  
GGGACCAGAAAAGATGGGGACA

>5

CTGGTGGCTCCCATCATTTATTGCTTTAGGACATACCCTTTTACCTACTTGCTATCATGCT  
GGACCTCAGCATTTCAGGGACCAGAAAAGATGGGGACACCAATGCAAGCCCAAGACT  
ACCATCCAGAGGACCGTTCCTG

>6

TCCATCATTTATTGCTTTAGGACATACCCTTTTACCTACTTGCTATCATGCTGGACCTCA  
GCATTTACAGGGACCAGAAAAGATGGGGACACCAATGCAAGCCCAAGACTACCATCCA  
GAGGACCGTTCCTGCCCATGCT

>7

TTTACCTACTTGCTATCATGCTGGACCTCAGCATTTCAGGGACCAGAAAAGATGGGGAC

ACCAATGCAAGCCCAAGACTACCATCCAGAGGACCGTTCCTGCCCATGCTGCTTTCTCT  
AGTTTTGCTTTCAGAGTGGTGT

>8

TGCTGGACCTCAGCATTTCAGGGACCAGAAAAGATGGGGACACCAATGCAAGCCCAA  
GACTACCATCCAGAGGACCGTTCCTGCCCATGCTGCTTTCTCTAGTTTTGCTTTCAGAG  
TGGTGTACCCCACTTGCTAACTC

>9

CTGGACCTCAGCATTTCAGGGACCAGAAAAGATGGGGACACCAATGCAAGCCCAAGA  
CTACCATCCAGAGGACCGTTCCTGCCCATGCTGCTTTCTCTAGTTTTGCTTTCAGAGTG  
GTGTCACCCCACTTGCTAACTCAA

>10

GATGGGGACACCAATGCAAGCCCAAGACTACCATCCAGAGGACCGTTCCTGCCCATGC  
TGCTTTCTCTAGTTTTGCTTTCAGAGTGGTGTACCCCACTTGCTAACTCAAGAGTGCA  
TCACTAGGCTTCCTGAGCAGGTT

>11

ACCGTTCCTGCCCATGCTGCTTTCTCTAGTTTTGCTTTCAGAGTGGTGTACCCCACTT  
GCTAACTCAAGAGTGATCACTAGGCTTCCTGAGCAGGTTTGATCAGGATTTGGCCTG  
GGTCTGTTGGTCAGGGAGGCAGA

>12

CGTTCCTGCCCATGCTGCTTTCTCTAGTTTTGCTTTCAGAGTGGTGTACCCCACTTGCT  
AACTCAAGAGTGATCACTAGGCTTCCTGAGCAGGTTTGATCAGGATTTGGCCTGGGT  
CTGTTGGTCAGGGAGGCAGAGG

>13

TTCAGAGTGGTGTACCCCACTTGCTAACTCAAGAGTGATCACTAGGCTTCCTGAGC  
AGGTTTGATCAGGATTTGGCCTGGGTCTGTTGGTCAGGGAGGCAGAGGTGTGGGGAG  
AAGGGTGAAAGGTGACTGAGCCAGG

>14

TAActCAAGAGTGATCACTAGGCTTCCTGAGCAGGTTTGATCAGGATTTGGCCTGGG  
TCTGTTGGTCAGGGAGGCAGAGGTGTGGGGAGAAGGGTGAAAGGTGACTGAGCCAG  
GGTTCACAGGCTCCTCACTCACGGGG

>15

TCAAGAGTGATCACTAGGCTTCCTGAGCAGGTTTGATCAGGATTTGGCCTGGGTCTGT  
TGGTCAGGGAGGCAGAGGTGTGGGGAGAAGGGTGAAAGGTGACTGAGCCAGGGTTC  
ACAGGCTCCTCACTCACGGGGCTGA

>16

ATCAGGATTTGGCCTGGGTCTGTTGGTCAGGGAGGCAGAGGTGTGGGGAGAAGGGTG  
AAAGGTGACTGAGCCAGGGTTCACAGGCTCCTCACTCACGGGGCTGAAGCTGGGCAT  
CGTCAGGCTCAGAGCCCCTAGACGTG

>17

GGATTTGGCCTGGGTCTGTTGGTCAGGGAGGCAGAGGTGTGGGGAGAAGGGTGAAAG  
GTGACTGAGCCAGGGTTCACAGGCTCCTCACTCACGGGGCTGAAGCTGGGCATCGTC  
AGGCTCAGAGCCCCTAGACGTGCGGC

>18

CTGGGTCTGTTGGTCAGGGAGGCAGAGGTGTGGGGAGAAGGGTGAAAGGTGACTGA  
GCCAGGGTTCACAGGCTCCTCACTCACGGGGCTGAAGCTGGGCATCGTCAGGCTCAG  
AGCCCCTAGACGTGCGGCAGCGGTAGC

>19

AGAGGTGTGGGGAGAAGGGTGAAAGGTGACTGAGCCAGGGTTCACAGGCTCCTCACT  
CACGGGGCTGAAGCTGGGCATCGTCAGGCTCAGAGCCCCTAGACGTGCGGCAGCGGT  
AGCCCTTCTTCTTGAGCACGTGGCAG

>20

GAAAGGTGACTGAGCCAGGGTTCACAGGCTCCTCACTCACGGGGCTGAAGCTGGGCA  
TCGTCAGGCTCAGAGCCCCTAGACGTGCGGCAGCGGTAGCCCTTCTTCTTGAGCACGT  
GGCAGATCATGAAGCCTACAGGCC

>21

AAGGTGACTGAGCCAGGGTTCACAGGCTCCTCACTCACGGGGCTGAAGCTGGGCATC  
GTCAGGCTCAGAGCCCCTAGACGTGCGGCAGCGGTAGCCCTTCTTCTTGAGCACGTGG  
CAGATCATGAAGCCTACAGGCCAT

>22

CTGAGCCAGGGTTCACAGGCTCCTCACTCACGGGGCTGAAGCTGGGCATCGTCAGGC  
TCAGAGCCCCTAGACGTGCGGCAGCGGTAGCCCTTCTTCTTGAGCACGTGGCAGATCA  
TGAAGCCTACAGGCCCATGAGGAAG

>23

TTCACAGGCTCCTCACTCACGGGGCTGAAGCTGGGCATCGTCAGGCTCAGAGCCCCTA  
GACGTGCGGCAGCGGTAGCCCTTCTTCTTGAGCACGTGGCAGATCATGAAGCCTACAG  
GCCCATGAGGAAGAAGACCAGCAC

>24

GGGGCTGAAGCTGGGCATCGTCAGGCTCAGAGCCCCTAGACGTGCGGCAGCGGTAGC  
CCTTCTTCTTGAGCACGTGGCAGATCATGAAGCCTACAGGCCCATGAGGAAGAAGACC  
AGCACAAGCAGGAAGAGCATATATA

>25

GTCAGGCTCAGAGCCCCTAGACGTGCGGCAGCGGTAGCCCTTCTTCTTGAGCACGTGG  
CAGATCATGAAGCCTACAGGCCATGAGGAAGAAGACCAGCACAAGCAGGAAGAGCA  
TATATAGCCCATGTTGGGGCGGTTTC

>26

TCAGAGCCCCTAGACGTGCGGCAGCGGTAGCCCTTCTTCTTGAGCACGTGGCAGATCA  
TGAAGCCTACAGGCCCATGAGGAAGAAGACCAGCACAAGCAGGAAGAGCATATATAG  
CCCATGTTGGGGCGGTTCCAGGTCA

>27

CTAGACGTGCGGCAGCGGTAGCCCTTCTTCTTGAGCACGTGGCAGATCATGAAGCCTA  
CAGGCCATGAGGAAGAAGACCAGCACAAGCAGGAAGAGCATATATAGCCCATGTTG  
GGGCGGTTCCAGGTCAGGCTGTGGT

>28

CAGCGGTAGCCCTTCTTCTTGAGCACGTGGCAGATCATGAAGCCTACAGGCCCATGAG  
GAAGAAGACCAGCACAAGCAGGAAGAGCATATATAGCCCATGTTGGGGCGGTTCCAG  
GTCAGGCTGTGGTCCGACATGAGG

>29

ACAGGCCCATGAGGAAGAAGACCAGCACAAGCAGGAAGAGCATATATAGCCCATGTT  
GGGGCGGTTCCAGGTCAGGCTGTGGTTCGACATGAGGCCCTGGGGGGCAGCGCGG  
GCCAGGGCGCCTCCTGGGTTTAGGGG

>30

CCCATGAGGAAGAAGACCAGCACAAGCAGGAAGAGCATATATAGCCCATGTTGGGGC

GGTTCAGGTCAGGCTGTGGTTCCGACATGAGGCCCTGGGGGCGAGCGCGGGCCAG  
GGCGCCTCCTGGGTTTAGGGGGCTGC

>31

GCACAAGCAGGAAGAGCATATATAGCCCATGTTGGGGCGGTTCCAGGTCAGGCTGTGG  
TTCCGACATGAGGCCCTGGGGGCGAGCGCGGGCCAGGGCGCCTCCTGGGTTTAGGG  
GGCTGCAGCTGGGAATGGGGGAGGG

>32

CCCATGTTGGGGCGGTTCCAGGTCAGGCTGTGGTTCCGACATGAGGCCCTGGGGGGCG  
AGCGCGGGCCAGGGCGCCTCCTGGGTTTAGGGGGCTGCAGCTGGGAATGGGGGAGGG  
GTAAGAATGCCGTCTCAGGATCTG

>33

CAGGTCAGGCTGTGGTTCCGACATGAGGCCCTGGGGGCGAGCGCGGGCCAGGGCGC  
CTCCTGGGTTTAGGGGGCTGCAGCTGGGAATGGGGGAGGGGTAAGAATGCCGTCTC  
AGGATCTGAAACAAGCACGTCTAAGA

>34

TGTGGTTCCGACATGAGGCCCTGGGGGCGAGCGCGGGCCAGGGCGCCTCCTGGGTT  
TAGGGGGCTGCAGCTGGGAATGGGGGAGGGGTAAGAATGCCGTCTCAGGATCTGAA  
ACAAGCACGTCTAAGACGTCCGGCTG

>35

GGCCAGGGCGCCTCCTGGGTTTAGGGGGCTGCAGCTGGGAATGGGGGAGGGGTAAGA  
ATGCCGTCTCAGGATCTGAAACAAGCACGTCTAAGACGTCCGGCTGAGGTCCGGCCC  
CACCCCTACCCAACCATGGGAGCT

>36

CCTGGGTTTAGGGGGCTGCAGCTGGGAATGGGGGAGGGGTAAGAATGCCGTCTCAG  
GATCTGAAACAAGCACGTCTAAGACGTCCGGCTGAGGTCCGGCCCCACCCCTACCCA  
ACCATGGGAGCTGTCCGGGCCAACA

>37

GGGGGCTGCAGCTGGGAATGGGGGAGGGGTAAGAATGCCGTCTCAGGATCTGAAAC  
AAGCACGTCTAAGACGTCCGGCTGAGGTCCGGCCCCACCCCTACCCAACCATGGGA  
GCTGTCCGGGCCAACAGTGCTGTTTC

>38

AGGATCTGAAACAAGCACGTCTAAGACGTCCGGCTGAGGTCCGGCCCCACCCCTACC  
CAACCATGGGAGCTGTCCGGGCCAACAGTGCTGTTTCGCCTTTCGGCAAGAGGTCAGC  
GACAACGCAAGCTCTTACCACGA

>39

ACGTCTAAGACGTCCGGCTGAGGTCCGGCCCCACCCCTACCCAACCATGGGAGCTGT  
CCGGGCCAACAGTGCTGTTTCGCCTTTCGGCAAGAGGTCAGCGACAACGCAAGCTCT  
CTACCACGACCATGGTCCGCTTCCC

>40

GTCCGGCCCCACCCCTACCCAACCATGGGAGCTGTCCGGGCCAACAGTGCTGTTTCG  
CCTTTCGGCAAGAGGTCAGCGACAACGCAAGCTCTTACCACGACCATGGTCCGCTTC  
CCCGACGCCCCGAGCGTTCCCTT

>41

CCAACCATGGGAGCTGTCCGGGCCAACAGTGCTGTTTCGCCTTTCGGCAAGAGGTCAG  
CGACAACGCAAGCTCTTACCACGACCATGGTCCGCTTCCCCGACGCCCCGAGCGTTC  
CCCTTTCAGCTTGTTTCGCGCTTC

>42

TTTCGGCAAGAGGTCAGCGACAACGCAAGCTCTCTACCACGACCATGGTCCGCTTCCC  
CGACGCCCCGAGCGTTCCTTTCCAGCTTGTTTCGCGCTTCTGTCCCTCCAAGGACA  
CTGCAGCACGAGATGGGACGGCAT

>43

AGCGACAACGCAAGCTCTCTACCACGACCATGGTCCGCTTCCCCGACGCCCCGAGCGT  
TCCCCTTTCCAGCTTGTTTCGCGCTTCTGTCCCTCCAAGGACACTGCAGCACGAGATG  
GGACGGCATTCTTAGGCGGCGGGA

>44

CCATGGTCCGCTTCCCCGACGCCCCGAGCGTTCCTTTCCAGCTTGTTTCGCGCTTCTG  
TCCCTCCAAGGACACTGCAGCACGAGATGGGACGGCATTCTTAGGCGGCGGGAGCA  
GAAATCCTGCCTGAGTCAGCGCCC

>45

CTTCCCCGACGCCCCGAGCGTTCCTTTCCAGCTTGTTTCGCGCTTCTGTCCCTCCCAA  
GGACTGCAGCACGAGATGGGACGGCATTCTTAGGCGGCGGGAGCAGAAATCCTGC  
CTGAGTCAGCGCCCGCACCTCCTC

>46

CCTTTCCAGCTTGTTTCGCGCTTCTGTCCCTCCAAGGACACTGCAGCACGAGATGGGA  
CGGCATTCTTAGGCGGCGGGAGCAGAAATCCTGCCTGAGTCAGCGCCCGCACCTCCTC  
CACGCCGGCCTGAGCCAGGCCTCT

>47

TTGTTTCGCGCTTCTGTCCCTCCAAGGACACTGCAGCACGAGATGGGACGGCATTCTT  
AGGCGGCGGGAGCAGAAATCCTGCCTGAGTCAGCGCCCGCACCTCCTCCACGCCGGC  
CTGAGCCAGGCCTCTGCAGCCCTT

>48

CCTCCAAGGACACTGCAGCACGAGATGGGACGGCATTCTTAGGCGGCGGGAGCAGA  
AATCCTGCCTGAGTCAGCGCCCGCACCTCCTCCACGCCGGCCTGAGCCAGGCCTCTGC  
AGCCCCTTCTCTCAGTACTCCCGC

>49

GCATTCTTAGGCGGCGGGAGCAGAAATCCTGCCTGAGTCAGCGCCCGCACCTCCTCCA  
CGCCGGCCTGAGCCAGGCCTCTGCAGCCCTTCTCTCAGTACTCCCGCACCCCTCTC  
CCTTTTGGTTTCTCCACCCTGA

>50

TCTTAGGCGGCGGGAGCAGAAATCCTGCCTGAGTCAGCGCCCGCACCTCCTCCACGCC  
GGCCTGAGCCAGGCCTCTGCAGCCCTTCTCTCAGTACTCCCGCACCCCTCTCCCTTT  
TTGGTTTCTCCACCCTGACCAC

>51

CGGGAGCAGAAATCCTGCCTGAGTCAGCGCCCGCACCTCCTCCACGCCGGCCTGAGC  
CAGGCCTCTGCAGCCCTTCTCTCAGTACTCCCGCACCCCTCTCCCTTTTGGTTTCT  
CCCACCCTGACCACCTGGCCGACC

>52

TGACCACCTGGCCGACCCGGTACCGGTGATTTGGTTCTGGTTCCGGCTTCTGCTGGGG  
TTCCGGCTCCAGGGGCGTCTAGTGCGGCTCAGGGCCCCGACGCCCTTCCGGCGCTC  
ATCCCTTGATTCATCCCCTCCCC

>53

CCGACCCGGTACCGGTGATTTGGTTCTGGTTCCGGCTTCTGCTGGGGTTCCGGCTCCAG

GGGCGTCTAGTGC GGCTCAGGGCCCCGACGCCCTTCCGGCGCTCATCCCTTGATTCA  
TCCCCTCCCCCTTCGCCGCCTC

>54

GATTCATCCCCTCCCCTTCGCCGCCTACCGGCCCGGGCTGTGGCTGCGGATACCCG  
CGCCGTGGCAGGCGGGGGAGGGAAGAACAGAGAAGGATGCGGGCTGGCTGAGAGC  
GGTGGCAGGCTCCGGGCAACTCCGG

>55

CTCCCCTTCGCCGCCTACCGGCCCGGGCTGTGGCTGCGGATACCCGCGCCGTGGC  
AGGCGGGGGGAGGGAAGAACAGAGAAGGATGCGGGCTGGCTGAGAGCGGTGGCAGG  
CTCCGGGCAACTCCGGCCCTGGGTCA

>56

GTGGCTGCGGATACCCGCGCCGTGGCAGGCGGGGGAGGGAAGAACAGAGAAGGAT  
GCGGGCTGGCTGAGAGCGGTGGCAGGCTCCGGGCAACTCCGGCCCTGGGTCAGGGAG  
ATTGCCTCCGCAGCCGCCCTGGCTTC

>57

GGCTGCGGATACCCGCGCCGTGGCAGGCGGGGGAGGGAAGAACAGAGAAGGATGC  
GGGCTGGCTGAGAGCGGTGGCAGGCTCCGGGCAACTCCGGCCCTGGGTCAGGGAGAT  
TGCCTCCGCAGCCGCCCTGGCTTCCA

>58

GAAGAACAGAGAAGGATGCGGGCTGGCTGAGAGCGGTGGCAGGCTCCGGGCAACTC  
CGGCCCTGGGTCAGGGAGATTGCCTCCGCAGCCGCCCTGGCTTCCAAATGCCTTCAC  
CCGTGCGGGGCCAGGACCAGGGGGC

>59

GCGGGCTGGCTGAGAGCGGTGGCAGGCTCCGGGCAACTCCGGCCCTGGGTCAGGGAG  
ATTGCCTCCGCAGCCGCCCTGGCTTCCAAATGCCTTACCCGTCGCGGGCCAGGAC  
CAGGGGGCGGAGCGCAGGTGTGCGG

>60

CCCTGGGTCAGGGAGATTGCCTCCGCAGCCGCCCTGGCTTCCAAATGCCTTACCCG  
TCGCGGGCCAGGACCAGGGGGCGGAGCGCAGGTGTGCGGGGCGGAGAGCGTGAGC  
TCTGCGCGCGGTGACTGCGCCGGGC

>61

ATTGCCTCCGCAGCCGCCCTGGCTTCCAAATGCCTTACCCGTCGCGGGCCAGGAC  
CAGGGGGCGGAGCGCAGGTGTGCGGGGCGGAGAGCGTGAGCTCTGCGCGCGGTGA  
CTGCGCCGGGCCCCCGGGGCAATG

>62

CTCCGACCGCCCTGGCTTCCAAATGCCTTACCCGTCGCGGGCCAGGACCAGGG  
GGCGGAGCGCAGGTGTGCGGGGCGGAGAGCGTGAGCTCTGCGCGCGGTGACTGCG  
CCGGGCCCCCGGGGCAATGTGCGG

>63

GGCTTCCAAATGCCTTACCCGTCGCGGGCCAGGACCAGGGGGCGGAGCGCAGGT  
GTGCGGGGCGGAGAGCGTGAGCTCTGCGCGCGGTGACTGCGCCGGGCCCCCGGG  
GCAATGTGCGGCGCCGAGTTTGGGTG

>64

GGGCGGAGAGCGTGAGCTCTGCGCGCGGTGACTGCGCCGGGCCCCCGGGGCAAT  
GTGCGGCGCCGAGTTTGGGTCCGGGTAGGGGACAGGCGGTCCGGCGTGGGTGTTGTC  
CACTGGTCTATCCGGTACGCCTGGCG



>65

GCTCTGCGCGCGTACTGCGCCGGGCCCCCGGGGCAATGTGCGGCCGAGTT  
TGGGTCCGGGTAGGGGACAGGCGGTCCGGCGTGGGTGTTGTCCACTGGTCTATCCGGT  
ACGCCTGGCGCAGCTCCTGCCCTCA

>66

GGGTCCGGGTAGGGGACAGGCGGTCCGGCGTGGGTGTTGTCCACTGGTCTATCCGGTA  
CGCCTGGCGCAGCTCCTGCCCTCAGATGCCCGACCGAGCGGAGAGTCAGGAATCTTC  
TCCGAGGGCTGGGGGAAGCCGGCT

>67

GGACAGGCGGTCCGGCGTGGGTGTTGTCCACTGGTCTATCCGGTACGCCTGGCGCAGC  
TCCTGCCCTCAGATGCCCGACCGAGCGGAGAGTCAGGAATCTTCTCCGAGGGCTGGG  
GGAAGCCGGCTTTCCGCACCTTTG

>68

GCGTGGGTGTTGTCCACTGGTCTATCCGGTACGCCTGGCGCAGCTCCTGCCCTCAGATG  
CCCCGACCGAGCGGAGAGTCAGGAATCTTCTCCGAGGGCTGGGGGAAGCCGGCTTTC  
CGCACCTTTGAGGGACGGAGTGGC

>69

GGTGTGTTGTCCACTGGTCTATCCGGTACGCCTGGCGCAGCTCCTGCCCTCAGATGCCCG  
ACCGAGCGGAGAGTCAGGAATCTTCTCCGAGGGCTGGGGGAAGCCGGCTTTCCGCAC  
CTTTGAGGGACGGAGTGGCGGGAT

>70

CCGGTACGCCTGGCGCAGCTCCTGCCCTCAGATGCCCGACCGAGCGGAGAGTCAGG  
AATCTTCTCCGAGGGCTGGGGGAAGCCGGCTTTCCGCACCTTTGAGGGACGGAGTGG  
CGGGATCTTCGGAGCTTCTAGAGAA

>71

GCCCCGACCGAGCGGAGAGTCAGGAATCTTCTCCGAGGGCTGGGGGAAGCCGGCTTT  
CCGCACCTTTGAGGGACGGAGTGGCGGGATCTTCGGAGCTTCTAGAGAAGTGACCA  
CGGCCTGCGCCCGTTTGGGGCAAGC

>72

CGAGCGGAGAGTCAGGAATCTTCTCCGAGGGCTGGGGGAAGCCGGCTTTCCGCACCT  
TTGAGGGACGGAGTGGCGGGATCTTCGGAGCTTCTAGAGAAGTGACCACGGCCTGC  
GCCCCGTTTGGGGCAAGCGGCTGGAT

>73

ATCTTCTCCGAGGGCTGGGGGAAGCCGGCTTTCCGCACCTTTGAGGGACGGAGTGGC  
GGGATCTTCGGAGCTTCTAGAGAAGTGACCACGGCCTGCGCCCGTTTGGGGCAAG  
CGGCTGGATGGGATGGCTCGGCTTCC

>74

GGGACGGAGTGGCGGGATCTTCGGAGCTTCTAGAGAAGTGACCACGGCCTGCGCCC  
GGTTTGGGGCAAGCGGCTGGATGGGATGGCTCGGCTTCCCGAGGATCTGACCCCCGGC  
CGGAGACAAATGGCCCTCGCATCCT

>75

CTAGAGAAGTGACCACGGCCTGCGCCCGTTTGGGGCAAGCGGCTGGATGGGATGGC  
TCGGCTTCCCGAGGATCTGACCCCCGGCCGAGACAAATGGCCCTCGCATCCTAGGAG  
CTATGCTGCCAGTTCCCTGCCAAC

>76

TGCGCCCGTTTGGGGCAAGCGGCTGGATGGGATGGCTCGGCTTCCCGAGGATCTGAC

CCCCGGCCGGAGACAAATGGCCCTCGCATCCTAGGAGCTATGCTGCCAGTTCCCTGCC  
CAACCCGGGACGCTCAAAGCCCCA

>77

GCTGGATGGGATGGCTCGGCTTCCCGAGGATCTGACCCCGGCCGGAGACAAATGGCC  
CTCGCATCCTAGGAGCTATGCTGCCAGTTCCCTGCCAACCCGGGACGCTCAAAGCCC  
CAGATACCCGGGAGAGCTGAGCCGG

>78

TCGGCTTCCCGAGGATCTGACCCCGGCCGGAGACAAATGGCCCTCGCATCCTAGGAG  
CTATGCTGCCAGTTCCCTGCCAACCCGGGACGCTCAAAGCCCCAGATACCCGGGAGAG  
CTGAGCCGGGCGAGGGGCGGAGCT

>79

CGGAGACAAATGGCCCTCGCATCCTAGGAGCTATGCTGCCAGTTCCCTGCCAACCCG  
GGACGCTCAAAGCCCCAGATACCCGGGAGAGCTGAGCCGGGCGAGGGGCGGAGCTCCC  
CTGGGGGCGTGGCCTGGGTGTGGAT

>80

CAAATGGCCCTCGCATCCTAGGAGCTATGCTGCCAGTTCCCTGCCAACCCGGGACGC  
TCAAAGCCCCAGATACCCGGGAGAGCTGAGCCGGGCGAGGGGCGGAGCTCCCCTGGGG  
GCGTGGCCTGGGTGTGGATGGAGGC

>81

TCGCATCCTAGGAGCTATGCTGCCAGTTCCCTGCCAACCCGGGACGCTCAAAGCCCC  
AGATACCCGGGAGAGCTGAGCCGGGCGAGGGGCGGAGCTCCCCTGGGGGCGTGGCCTG  
GGTGTGGATGGAGGCGGGGCCGAA

>82

AGTTCCCTGCCAACCCGGGACGCTCAAAGCCCCAGATACCCGGGAGAGCTGAGCCGG  
GCGAGGGGCGGAGCTCCCCTGGGGGCGTGGCCTGGGTGTGGATGGAGGCGGGGCCG  
AACGCCAGTTCCGCAGAGGCCGGCT

>83

AGATACCCGGGAGAGCTGAGCCGGGCGAGGGGCGGAGCTCCCCTGGGGGCGTGGCCTG  
GGTGTGGATGGAGGCGGGGCCGCAACGCCAGTTCCGCAGAGGCCGGCTACTTGCTT  
GCGCAGCACGCACGGCCGGGAGGGG

>84

CCGGGCGAGGGGCGGAGCTCCCCTGGGGGCGTGGCCTGGGTGTGGATGGAGGCGGG  
GCCGCAACGCCAGTTCCGCAGAGGCCGGCTACTTGCTTGCAGCACGCACGGCCG  
GGGAGGGGCTGGCGGCGGCCGCGGGCG

>85

TGGCCTGGGTGTGGATGGAGGCGGGGCCGCAACGCCAGTTCCGCAGAGGCCGGCTA  
CTTGCTTGCAGCACGCACGGCCGGGAGGGGCTGGCGGCGGCCGCGGGCGGCGG  
GCGGCGGAGTCGCGGGGCTGCTCCCG

>86

GAGGCGGGGCCGCAACGCCAGTTCCGCAGAGGCCGGCTACTTGCTTGCAGCACG  
CACGGCCGGGAGGGGCTGGCGGCGGCCGCGGGCGGCGGGCGGCGGAGTCGCGGGG  
CCTGCTCCCGCCGCCACCATGGCCAAG

>87

GGCTACTTGCTTGCAGCACGCACGGCCGGGAGGGGCTGGCGGCGGCCGCGGGCG  
GCGGGCGGCGGAGTCGCGGGGCTGCTCCCGCCGCCACCATGGCCAAGACCGTGGCC  
TATTTCTACGACCCCGACGTGGGCAA

>88

GGGCTGGCGGCGGCCGCGGGCGGCGGGCGGCGGAGTCGCGGGGCCTGCTCCCGCCG  
GCACCATGGCCAAGACCGTGGCCTATTTCTACGACCCCGACGTGGGCAACTTCCACTA  
CGGTGAGGAAACAGGGCTATGCATGA

>89

CGCCGGCACCATGGCCAAGACCGTGGCCTATTTCTACGACCCCGACGTGGGCAACTTC  
CACTACGGTGAGGAAACAGGGCTATGCATGAGGGGTTGGGACACGGAGGTTTTGAGG  
CGGGGTTGCAACTCCAGGGGTGAGA

>90

ACCATGGCCAAGACCGTGGCCTATTTCTACGACCCCGACGTGGGCAACTTCCACTACG  
GTGAGGAAACAGGGCTATGCATGAGGGGTTGGGACACGGAGGTTTTGAGGCGGGGTT  
GCAACTCCAGGGGTGAGAGCTGACG

>91

CGACCCCGACGTGGGCAACTTCCACTACGGTGAGGAAACAGGGCTATGCATGAGGGG  
TTGGGACACGGAGGTTTTGAGGCGGGGTTGCAACTCCAGGGGTGAGAGCTGACGAAC  
TCTTCTCTCCACCCCAAGGAGCTG

>92

ACGTGGGCAACTTCCACTACGGTGAGGAAACAGGGCTATGCATGAGGGGTTGGGACA  
CGGAGGTTTTGAGGCGGGGTTGCAACTCCAGGGGTGAGAGCTGACGAACTCTTCTCT  
CCCCACCCCAAGGAGCTGGACACCT

>93

ACGGTGAGGAAACAGGGCTATGCATGAGGGGTTGGGACACGGAGGTTTTGAGGCGGG  
GTTGCAACTCCAGGGGTGAGAGCTGACGAACTCTTCTCTCCACCCCAAGGAGCTG  
GACACCCTATGAAGCCTCATCGCCTG

>94

GAGGTTTTGAGGCGGGGTTGCAACTCCAGGGGTGAGAGCTGACGAACTCTTCTCTCC  
CCACCCCAAGGAGCTGGACACCCTATGAAGCCTCATCGCCTGGCATTGACCCATAGCC  
TGGTCTGCATTACGGTCTCTATAA

>95

TTGCAACTCCAGGGGTGAGAGCTGACGAACTCTTCTCTCCACCCCAAGGAGCTGG  
ACACCCTATGAAGCCTCATCGCCTGGCATTGACCCATAGCCTGGTCTGCATTACGGTC  
TCTATAAGAAGATGATCGTGAGTT

>96

GAACTCTTCTCTCCACCCCAAGGAGCTGGACACCCTATGAAGCCTCATCGCCTGGC  
ATTGACCCATAGCCTGGTCTGCATTACGGTCTCTATAAGAAGATGATCGTGAGTTCCG  
CCGCCTCGGCCGGGGGTTGGGGG

>97

TGGACACCCTATGAAGCCTCATCGCCTGGCATTGACCCATAGCCTGGTCTGCATTACG  
GTCTCTATAAGAAGATGATCGTGAGTTCCGCCGCTCGGCCGGGGGTTGGGGGGTGGG  
GCGAGCTGTGGCCGTAGGGATAG

>98

ACACCCTATGAAGCCTCATCGCCTGGCATTGACCCATAGCCTGGTCTGCATTACGGTC  
TCTATAAGAAGATGATCGTGAGTTCCGCCGCTCGGCCGGGGGTTGGGGGGTGGGGCG  
AGCTGTGGCCGTAGGGATAGGTG

>99

CATTACGGTCTCTATAAGAAGATGATCGTGAGTTCCGCCGCTCGGCCGGGGGTTGGG

GGGTGGGGCGAGCTGTGGCCGTAGGGATAGGTGGGCTGGACTGAGTGCATGAAGTGC  
GACCCGCCCTAGAGTATCGGGGAG

>100

TATAAGAAGATGATCGTGAGTTCGCCGCCCTCGGCCGGGGTTGGGGGGTGGGGCGA  
GCTGTGGCCGTAGGGATAGGTGGGCTGGACTGAGTGCATGAAGTGCACCCGCCCTA  
GAGTATCGGGGAGCTGGATAGAAGT

>101

TCCGCCGCCCTCGGCCGGGGTTGGGGGGTGGGGCGAGCTGTGGCCGTAGGGATAGGT  
GGGCTGGACTGAGTGCATGAAGTGCACCCGCCCTAGAGTATCGGGGAGCTGGATAG  
AAGTCACCAGGAGTACCTTGAAAGT

>102

GGGTGGGGCGAGCTGTGGCCGTAGGGATAGGTGGGCTGGACTGAGTGCATGAAGTGC  
GACCCGCCCTAGAGTATCGGGGAGCTGGATAGAAGTCACCAGGAGTACCTTGAAAGT  
GCAGGGTGTGGGGGTGGCGTCCTC

>103

GTGGGGCGAGCTGTGGCCGTAGGGATAGGTGGGCTGGACTGAGTGCATGAAGTGC  
CCCGCCCTAGAGTATCGGGGAGCTGGATAGAAGTCACCAGGAGTACCTTGAAAGTGC  
AGGGTGTGGGGGTGGCGTCCTCTG

>104

GTAGGGATAGGTGGGCTGGACTGAGTGCATGAAGTGCACCCGCCCTAGAGTATCGG  
GGAGCTGGATAGAAGTCACCAGGAGTACCTTGAAAGTGCAGGGTGTGGGGGTGGCG  
TCCTCTGCTTAATGGAAAGTACTTT

>105

TGAAGTGCACCCGCCCTAGAGTATCGGGGAGCTGGATAGAAGTCACCAGGAGTACC  
TTGAAAGTGCAGGGTGTGGGGGTGGCGTCCTCTGCTTAATGGAAAGTACTTTCTCAC  
CTCAGGTCGGCCACCCTCTGACTG

>106

GGATAGAAGTCACCAGGAGTACCTTGAAAGTGCAGGGTGTGGGGGTGGCGTCCTCT  
GCTTAATGGAAAGTACTTTCTCACCTCAGGTCGGCCACCCTCTGACTGTAGGCACACTA  
GCCCTTGGCCTAGGGTTAGCGTGA

>107

GAGTACCTTGAAAGTGCAGGGTGTGGGGGTGGCGTCCTCTGCTTAATGGAAAGTACT  
TTCTCACCTCAGGTCGGCCACCCTCTGACTGTAGGCACACTAGCCCTTGGCCTAGGGTT  
AGCGTGATGTGGGGCTGGTTTGA

>108

GTTGGGGGTGGCGTCCTCTGCTTAATGGAAAGTACTTTCTCACCTCAGGTCGGCCACC  
CTCTGACTGTAGGCACACTAGCCCTTGGCCTAGGGTTAGCGTGATGTGGGGCTGGTTT  
GAAGACAGAAGGTGTGTTCCCTCT

>109

GGCGTCCTCTGCTTAATGGAAAGTACTTTCTCACCTCAGGTCGGCCACCCTCTGACTGT  
AGGCACACTAGCCCTTGGCCTAGGGTTAGCGTGATGTGGGGCTGGTTTGAAGACAGAA  
GGTGTGTTCCCTCTGCATTTT

>110

GAAAGTACTTTCTCACCTCAGGTCGGCCACCCTCTGACTGTAGGCACACTAGCCCTTG  
GCCTAGGGTTAGCGTGATGTGGGGCTGGTTTGAAGACAGAAGGTGTGTTCCCTCTCTG  
CATTTTAGAGTGTGGATAGGGCCT

>111

CGGCCACCCTCTGACTGTAGGCACACTAGCCCTTGGCCTAGGGTTAGCGTGATGTGGG  
GCTGGTTTGAAGACAGAAGGTGTGTTCCCTCTCTGCATTTTAGAGTGTGGATAGGGCC  
TTGGCCTCAGGAATTAGGGTTAGG

>112

CACCCTCTGACTGTAGGCACACTAGCCCTTGGCCTAGGGTTAGCGTGATGTGGGGCTG  
GTTTGAAGACAGAAGGTGTGTTCCCTCTCTGCATTTTAGAGTGTGGATAGGGCCTTGG  
CCTCAGGAATTAGGGTTAGGGGAG

>113

CTTGGCCTAGGGTTAGCGTGATGTGGGGCTGGTTTGAAGACAGAAGGTGTGTTCCCTCC  
TCTGCATTTTAGAGTGTGGATAGGGCCTTGGCCTCAGGAATTAGGGTTAGGGGAGCGG  
ATATCACTGTATCAGGGTGTGAGG

>114

GGGCTGGTTTGAAGACAGAAGGTGTGTTCCCTCTCTGCATTTTAGAGTGTGGATAGGG  
CCTTGGCCTCAGGAATTAGGGTTAGGGGAGCGGATATCACTGTATCAGGGTGTGAGGT  
TTACCCTCAGTTCCCACTCCTCTT

>115

TTTGAAGACAGAAGGTGTGTTCCCTCTCTGCATTTTAGAGTGTGGATAGGGCCTTGGCC  
TCAGGAATTAGGGTTAGGGGAGCGGATATCACTGTATCAGGGTGTGAGGTTTACCCTCA  
GTTCCCACTCCTCTTTTACCAC

>116

GACAGAAGGTGTGTTCCCTCTCTGCATTTTAGAGTGTGGATAGGGCCTTGGCCTCAGG  
AATTAGGGTTAGGGGAGCGGATATCACTGTATCAGGGTGTGAGGTTTACCCTCAGTTCC  
CACTCCTCTTTTACCACCTTTCT

>117

GCATTTTAGAGTGTGGATAGGGCCTTGGCCTCAGGAATTAGGGTTAGGGGAGCGGATAT  
CACTGTATCAGGGTGTGAGGTTTACCCTCAGTTCCCACTCCTCTTTTACCACCTTTCTTT  
ACCTCCAAGGAGCTAGGGCTC

>118

TCACTGTATCAGGGTGTGAGGTTTACCCTCAGTTCCCACTCCTCTTTTACCACCTTTCTT  
TACCTCCAAGGAGCTAGGGCTCCAGGGTGAACGATGCTGCCGTCTTTGTAAATGTGT  
ATGTGCGTGTGGAACAGAGGCG

>119

CTGTATCAGGGTGTGAGGTTTACCCTCAGTTCCCACTCCTCTTTTACCACCTTTCTTTAC  
CTCCAAGGAGCTAGGGCTCCAGGGTGAACGATGCTGCCGTCTTTGTAAATGTGTATG  
TGCGTGTGGAACAGAGGCGATA

>120

CCAAGGAGCTAGGGCTCCAGGGTGAACGATGCTGCCGTCTTTGTAAATGTGTATGTG  
CGTGTGGAACAGAGGCGATATTTAGATATTCCTTTTTCAGCCTGGAATACCTCTACATG  
GTTCTGCTTAATCGCTATCCAG

>121

AAGGAGCTAGGGCTCCAGGGTGAACGATGCTGCCGTCTTTGTAAATGTGTATGTGCG  
TGTGGAACAGAGGCGATATTTAGATATTCCTTTTTCAGCCTGGAATACCTCTACATGGT  
TCTGCTTAATCGCTATCCAGT

>122

ATGCTGCCGTCTTTGTAAATGTGTATGTGCGTGTGGAACAGAGGCGATATTTAGATATT

CCTTTTTCAGCCTGGAATACCTCTACATGGTTCTGCTTAATCGCTATCCAGTTTTTCATCT  
ACCAGACATACACATGCTG

>123

AGGCGATATTTTAGATATTCCTTTTTCAGCCTGGAATACCTCTACATGGTTCTGCTTAATC  
GCTATCCAGTTTTTCATCTACCAGACATACACATGCTGTCTTCCCAGCTTGAATTTATG  
GCTGTGATATGGGATAGTA

>124

TATTCCTTTTTCAGCCTGGAATACCTCTACATGGTTCTGCTTAATCGCTATCCAGTTTTTC  
ATCTACCAGACATACACATGCTGTCTTCCCAGCTTGAATTTATGGCTGTGATATGGGAT  
AGTAACAGTTAAGCCACGC

>125

CCTCTACATGGTTCTGCTTAATCGCTATCCAGTTTTTCATCTACCAGACATACACATGCT  
GTCTTCCCAGCTTGAATTTATGGCTGTGATATGGGATAGTAACAGTTAAGCCACGCCA  
GGCGTGGTGGCCCATGCCTGT

>126

AGTTTTTCATCTACCAGACATACACATGCTGTCTTCCCAGCTTGAATTTATGGCTGTGA  
TATGGGATAGTAACAGTTAAGCCACGCCAGGCGTGGTGGCCCATGCCTGTAATCCCAGC  
ACTTTGGGAGGTTGAAATGGG

>127

TCATCTACCAGACATACACATGCTGTCTTCCCAGCTTGAATTTATGGCTGTGATATGGG  
ATAGTAACAGTTAAGCCACGCCAGGCGTGGTGGCCCATGCCTGTAATCCCAGCACTTT  
GGGAGGTTGAAATGGGGGGGAT

>128

TACCAGACATACACATGCTGTCTTCCCAGCTTGAATTTATGGCTGTGATATGGGATAGT  
AACAGTTAAGCCACGCCAGGCGTGGTGGCCCATGCCTGTAATCCCAGCACTTTGGGAG  
GTTGAAATGGGGGGGATCGCTT

>129

TACACATGCTGTCTTCCCAGCTTGAATTTATGGCTGTGATATGGGATAGTAACAGTTAA  
GCCACGCCAGGCGTGGTGGCCCATGCCTGTAATCCCAGCACTTTGGGAGGTTGAAATG  
GGGGGGATCGCTTGAGGCCAGG

>130

TTATGGCTGTGATATGGGATAGTAACAGTTAAGCCACGCCAGGCGTGGTGGCCCATGCC  
TGTAATCCCAGCACTTTGGGAGGTTGAAATGGGGGGGATCGCTTGAGGCCAGGAGTTG  
GAGACCAGCTTGGGCCACAGTGG

>131

CGCCAGGCGTGGTGGCCCATGCCTGTAATCCCAGCACTTTGGGAGGTTGAAATGGGGG  
GGATCGCTTGAGGCCAGGAGTTGGAGACCAGCTTGGGCCACAGTGGGACCCACATCT  
ACAAAAAATAAAAAATAAAAAAAGTA

>132

GGCGTGGTGGCCCATGCCTGTAATCCCAGCACTTTGGGAGGTTGAAATGGGGGGGATC  
GCTTGAGGCCAGGAGTTGGAGACCAGCTTGGGCCACAGTGGGACCCACATCTACAAA  
AAATAAAAAATAAAAAAAGTAGCCAT

>133

CAGCACTTTGGGAGGTTGAAATGGGGGGGATCGCTTGAGGCCAGGAGTTGGAGACCA  
GCTTGGGCCACAGTGGGACCCACATCTACAAAAAATAAAAAATAAAAAAAGTAGCCATG  
TGCGGTGGGTGTGCCTGTAGTCCCA

>134

AGGCCAGGAGTTGGAGACCAGCTTGGGCCACAGTGGGACCCACATCTACAAAAAATA  
AAAATAAAAAAAGTAGCCATGTGCGGTGGGTGTGCCTGTAGTCCCAACTACTTGGGAG  
GCCGAGGCCGAGAGGATGGCTTGGGC

>135

CCAGGAGTTGGAGACCAGCTTGGGCCACAGTGGGACCCACATCTACAAAAAATAAAA  
ATAAAAAAAGTAGCCATGTGCGGTGGGTGTGCCTGTAGTCCCAACTACTTGGGAGGCC  
GAGGCCGAGAGGATGGCTTGGGCCCA

>136

CTACAAAAAATAAAAAAATAAAAAAAGTAGCCATGTGCGGTGGGTGTGCCTGTAGTCCCA  
ACTACTTGGGAGGCCGAGGCCGAGAGGATGGCTTGGGCCCAGGAGTTAAAGTTACAG  
TGATCTATGATCAGCAGCCTGAGTT

>137

AAAATAAAAAAATAAAAAAAGTAGCCATGTGCGGTGGGTGTGCCTGTAGTCCCAACTACT  
TGGGAGGCCGAGGCCGAGAGGATGGCTTGGGCCCAGGAGTTAAAGTTACAGTGATCTA  
TGATCAGCAGCCTGAGTTGACAGG

>138

CATGTGCGGTGGGTGTGCCTGTAGTCCCAACTACTTGGGAGGCCGAGGCCGAGAGGATG  
GCTTGGGCCCAGGAGTTAAAGTTACAGTGATCTATGATCAGCAGCCTGAGTTGACAG  
GGAGGACCTTGTCTCAAAAGAAAA

>139

GCCTGTAGTCCCAACTACTTGGGAGGCCGAGGCCGAGAGGATGGCTTGGGCCCAGGAG  
TTAAAGTTACAGTGATCTATGATCAGCAGCCTGAGTTGACAGGGAGGACCTTGTCTCA  
AAAGAAAAAATAAGACAAAACAGC

>140

CTACTTGGGAGGCCGAGGCCGAGAGGATGGCTTGGGCCCAGGAGTTAAAGTTACAGT  
GATCTATGATCAGCAGCCTGAGTTGACAGGGAGGACCTTGTCTCAAAAGAAAAAATAA  
GACAAAACAGCTAAACCCAGGCTTT

>141

CTTGGGAGGCCGAGGCCGAGAGGATGGCTTGGGCCCAGGAGTTAAAGTTACAGTGAT  
CTATGATCAGCAGCCTGAGTTGACAGGGAGGACCTTGTCTCAAAAGAAAAAATAAGA  
CAAAACAGCTAAACCCAGGCTTTATG

>142

AGAGGATGGCTTGGGCCCAGGAGTTAAAGTTACAGTGATCTATGATCAGCAGCCTGA  
GTTGACAGGGAGGACCTTGTCTCAAAAGAAAAAATAAGACAAAACAGCTAAACCCAG  
GCTTTATGTGTTGCTAGGGAAACTA

>143

AAAGTTACAGTGATCTATGATCAGCAGCCTGAGTTGACAGGGAGGACCTTGTCTCAAA  
AGAAAAAATAAGACAAAACAGCTAAACCCAGGCTTTATGTGTTGCTAGGGAACTAGT  
GAACAATATGAATGAATGTTTCATT

>144

GTGATCTATGATCAGCAGCCTGAGTTGACAGGGAGGACCTTGTCTCAAAAGAAAAAAT  
AAGACAAAACAGCTAAACCCAGGCTTTATGTGTTGCTAGGGAACTAGTGAACAATAT  
GAATGAATGTTTCATTGCTTGTGCC

>145

ATCAGCAGCCTGAGTTGACAGGGAGGACCTTGTCTCAAAAGAAAAAATAAGACAAA

CAGCTAAACCCAGGCTTTATGTGTTGCTAGGGAAACTAGTGAACAATATGAATGAATGT  
TCATTGCTTGTGCCAAGGCACAGA

>146

ACAGGGAGGACCTTGTCTCAAAAGAAAAATAAGACAAAACAGCTAAACCCAGGCTT  
TATGTGTTGCTAGGGAAACTAGTGAACAATATGAATGAATGTTTCATTGCTTGTGCCAAG  
GCACAGACAAATGGACTGGTCATA

>147

AACCCAGGCTTTATGTGTTGCTAGGGAAACTAGTGAACAATATGAATGAATGTTTCATTG  
CTTGTGCCAAGGCACAGACAAATGGACTGGTCATAGAAAAGACTGAGGTGATGTTAGT  
GCAGGAATCTATATCCCTTGAGA

>148

GGCTTTATGTGTTGCTAGGGAAACTAGTGAACAATATGAATGAATGTTTCATTGCTTGTG  
CCAAGGCACAGACAAATGGACTGGTCATAGAAAAGACTGAGGTGATGTTAGTGCAGG  
AATCTATATCCCTTGAGATTGTTT

>149

TAGTGAACAATATGAATGAATGTTTCATTGCTTGTGCCAAGGCACAGACAAATGGACTG  
GTCATAGAAAAGACTGAGGTGATGTTAGTGCAGGAATCTATATCCCTTGAGATTGTTT  
CCTGTATGTACCTGTGTGCATTT

>150

TGAATGTTTCATTGCTTGTGCCAAGGCACAGACAAATGGACTGGTCATAGAAAAGACTG  
AGGTGATGTTAGTGCAGGAATCTATATCCCTTGAGATTGTTTGCCTGTATGTACCTGTGT  
GCATTTTCTGGGAGAAGAAAAG

>151

GTTTCATTGCTTGTGCCAAGGCACAGACAAATGGACTGGTCATAGAAAAGACTGAGGTG  
ATGTTAGTGCAGGAATCTATATCCCTTGAGATTGTTTGCCTGTATGTACCTGTGTGCATTT  
TCTGGGAGAAGAAAAGCTCTT

>152

GGCACAGACAAATGGACTGGTCATAGAAAAGACTGAGGTGATGTTAGTGCAGGAATCT  
ATATCCCTTGAGATTGTTTGCCTGTATGTACCTGTGTGCATTTTCTGGGAGAAGAAAAG  
CTCTTTCTTGTGCAGTTTTCAA

>153

GATGTTAGTGCAGGAATCTATATCCCTTGAGATTGTTTGCCTGTATGTACCTGTGTGCAT  
TTTCTGGGAGAAGAAAAGCTCTTTCTTGTGCAGTTTTCAAAGAGGTGTGACACATCCC  
CCTGACCTTCCAAAGATAATAA

>154

GTTAGTGCAGGAATCTATATCCCTTGAGATTGTTTGCCTGTATGTACCTGTGTGCATTTT  
CTGGGAGAAGAAAAGCTCTTTCTTGTGCAGTTTTCAAAGAGGTGTGACACATCCCCCT  
GACCTTCCAAAGATAATAAATC

>155

CCCTTGAGATTGTTTGCCTGTATGTACCTGTGTGCATTTTCTGGGAGAAGAAAAGCTCT  
TTCTTGTGCAGTTTTCAAAGAGGTGTGACACATCCCCCTGACCTTCCAAAGATAATAAA  
TCTTTGATTTAATTAGAAAGT

>156

CTGGGAGAAGAAAAGCTCTTTCTTGTGCAGTTTTCAAAGAGGTGTGACACATCCCCCT  
GACCTTCCAAAGATAATAAATCTTTGATTTAATTAGAAAGTTGACATATATCCCATATAT  
TTGATCCAGAAAGAAGATCCA



>157

TGCAGTTTTCAAAGAGGTGTGACACATCCCCCTGACCTTCAAAGATAATAAATCTTTG  
ATTTAATTAGAAAAGTTGACATATATCCCATATATTTGATCCAGAAAAGAAGATCCAGAGG  
AAAGAGGACAGAATCAGAGCT

>158

GACCTTCAAAGATAATAAATCTTTGATTTAATTAGAAAAGTTGACATATATCCCATATAT  
TTGATCCAGAAAAGAAGATCCAGAGGAAAGAGGACAGAATCAGAGCTTGGGGAGGAG  
ATGAGCATGGAGAGAACTGGGAA

>159

TTCAAAGATAATAAATCTTTGATTTAATTAGAAAAGTTGACATATATCCCATATATTTGA  
TCCAGAAAAGAAGATCCAGAGGAAAGAGGACAGAATCAGAGCTTGGGGAGGAGATGA  
GCATGGAGAGAACTGGGAATAGG

>160

TCTTTGATTTAATTAGAAAAGTTGACATATATCCCATATATTTGATCCAGAAAAGAAGATCC  
AGAGGAAAAGAGGACAGAATCAGAGCTTGGGGAGGAGATGAGCATGGAGAGAACTGG  
GAATAGGAGATTCCAAGGAACAG

>161

CCCATATATTTGATCCAGAAAAGAAGATCCAGAGGAAAGAGGACAGAATCAGAGCTTGG  
GGAGGAGATGAGCATGGAGAGAACTGGGAATAGGAGATTCCAAGGAACAGGGCAGGT  
GGATCAGGGCTCAAAGTTGAGAAGG

>162

ATTTGATCCAGAAAAGAAGATCCAGAGGAAAGAGGACAGAATCAGAGCTTGGGGAGGA  
GATGAGCATGGAGAGAACTGGGAATAGGAGATTCCAAGGAACAGGGCAGGTGGATCA  
GGGCTCAAAGTTGAGAAGGTACGATA

>163

GAAGATCCAGAGGAAAGAGGACAGAATCAGAGCTTGGGGAGGAGATGAGCATGGAG  
AGAAGTGGGAATAGGAGATTCCAAGGAACAGGGCAGGTGGATCAGGGCTCAAAGTTG  
AGAAGGTACGATAGGCTGAGCTGGAGG

>164

AGGACAGAATCAGAGCTTGGGGAGGAGATGAGCATGGAGAGAACTGGGAATAGGAGA  
TTCCAAGGAACAGGGCAGGTGGATCAGGGCTCAAAGTTGAGAAGGTACGATAGGCTG  
AGCTGGAGGTGGAAGGAAAAGAAGT

>165

GGAGATGAGCATGGAGAGAACTGGGAATAGGAGATTCCAAGGAACAGGGCAGGTGGA  
TCAGGGCTCAAAGTTGAGAAGGTACGATAGGCTGAGCTGGAGGTGGAAGGAAAAG  
AAGTGGTCTTCAGGGGGCTCATTTGTA

>166

TGAGCATGGAGAGAACTGGGAATAGGAGATTCCAAGGAACAGGGCAGGTGGATCAGG  
GCTCAAAGTTGAGAAGGTACGATAGGCTGAGCTGGAGGTGGAAGGAAAAGAAGTG  
GTCTTCAGGGGGCTCATTTGTAATAAC

>167

GAAGTGGGAATAGGAGATTCCAAGGAACAGGGCAGGTGGATCAGGGCTCAAAGTTGA  
GAAGGTACGATAGGCTGAGCTGGAGGTGGAAGGAAAAGAAGTGGTCTTCAGGGGG  
CTCATTTGTAATAACTTACCTGGTTAA

>168

CAAGGAACAGGGCAGGTGGATCAGGGCTCAAAGTTGAGAAGGTACGATAGGCTGAGC

TGGAGGTGGAAAGGAAAAGAAGTGGTCTTCAGGGGGCTCATTTGTAATAACTTACCTG  
GTTAATCGGAGTCTCTCTACTGACT

>169

ATCAGGGCTCAAAGTTGAGAAGGTACGATAGGCTGAGCTGGAGGTGGAAAGGAAAAG  
AAGTGGTCTTCAGGGGGCTCATTTGTAATAACTTACCTGGTTAATCGGAGTCTCTCTAC  
TGACTIONAAGGATTGTGGGATGAGG

>170

CTGGAGGTGGAAAGGAAAAGAAGTGGTCTTCAGGGGGCTCATTTGTAATAACTTACCT  
GGTTAATCGGAGTCTCTCTACTGACTTAAGGATTGTGGGATGAGGGGAATGCTATGTTT  
GGCTTCATATAGTCTCCAGGACT

>171

AGAAGTGGTCTTCAGGGGGCTCATTTGTAATAACTTACCTGGTTAATCGGAGTCTCTCT  
ACTGACTTAAGGATTGTGGGATGAGGGGAATGCTATGTTTGGCTTCATATAGTCTCCAG  
GACTGGTTCAGTATGGGTGGTC

>172

GGGGGCTCATTTGTAATAACTTACCTGGTTAATCGGAGTCTCTCTACTGACTTAAGGATT  
GTGGGATGAGGGGAATGCTATGTTTGGCTTCATATAGTCTCCAGGACTGGTTCAGTATG  
GGTGGTCTGAGCCTGTGGAGT

>173

GTTAATCGGAGTCTCTCTACTGACTTAAGGATTGTGGGATGAGGGGAATGCTATGTTT  
GCTTCATATAGTCTCCAGGACTGGTTCAGTATGGGTGGTCTGAGCCTGTGGAGTGGGGC  
TGACCCTGCCTGGGTTTCATCTT

>174

ACTGACTTAAGGATTGTGGGATGAGGGGAATGCTATGTTTGGCTTCATATAGTCTCCAG  
GACTGGTTCAGTATGGGTGGTCTGAGCCTGTGGAGTGGGGCTGACCCTGCCTGGGTTT  
ATCTTGTGTATCCATCCCGAGGT

>175

GTGGGATGAGGGGAATGCTATGTTTGGCTTCATATAGTCTCCAGGACTGGTTCAGTATG  
GGTGGTCTGAGCCTGTGGAGTGGGGCTGACCCTGCCTGGGTTTCATCTTGTGTATCCATC  
CCGAGGTCTTCAAGCCATACCA

>176

GGGGAATGCTATGTTTGGCTTCATATAGTCTCCAGGACTGGTTCAGTATGGGTGGTCTG  
AGCCTGTGGAGTGGGGCTGACCCTGCCTGGGTTTCATCTTGTGTATCCATCCCGAGGTCT  
TCAAGCCATACCAGGCCTCCCA

>177

GGTCTGAGCCTGTGGAGTGGGGCTGACCCTGCCTGGGTTTCATCTTGTGTATCCATCCCG  
AGGTCTTCAAGCCATACCAGGCCTCCAGCATGACATGTGCCGCTTCCACTCCGAGGA  
CTACATTGACTTCTGCAGAGAG

>178

CTGTGGAGTGGGGCTGACCCTGCCTGGGTTTCATCTTGTGTATCCATCCCGAGGTCTTCA  
AGCCATACCAGGCCTCCAGCATGACATGTGCCGCTTCCACTCCGAGGACTACATTGA  
CTTCTGCAGAGAGTCAGCCCCA

>179

GTGTATCCATCCCGAGGTCTTCAAGCCATACCAGGCCTCCAGCATGACATGTGCCGCT  
TCCACTCCGAGGACTACATTGACTTCTGCAGAGAGTCAGCCCCACCAATATGCAAGG  
CTTACCAAGAGTCTTAATGCCT

>180

CAAGCCATACCAGGCCTCCAGCATGACATGTGCCGCTTCCACTCCGAGGACTACATT  
GACTTCCTGCAGAGAGTCAGCCCCACCAATATGCAAGGCTTCACCAAGAGTCTTAATG  
CCTTCAACGTAGGCGATGACTGGT

>181

AGCCATACCAGGCCTCCAGCATGACATGTGCCGCTTCCACTCCGAGGACTACATTGA  
CTTCCTGCAGAGAGTCAGCCCCACCAATATGCAAGGCTTCACCAAGAGTCTTAATGCC  
TTCAACGTAGGCGATGACTGGTGA

>182

GACATGTGCCGCTTCCACTCCGAGGACTACATTGACTTCCTGCAGAGAGTCAGCCCCA  
CCAATATGCAAGGCTTCACCAAGAGTCTTAATGCCTTCAACGTAGGCGATGACTGGTG  
AGGGAGGACTGGGAGTTTTGATGT

>183

GACTTCCTGCAGAGAGTCAGCCCCACCAATATGCAAGGCTTCACCAAGAGTCTTAATG  
CCTTCAACGTAGGCGATGACTGGTGAGGGAGGACTGGGAGTTTTGATGTCTAACAGTT  
TAATGCCAAGCCCTTCAGTGAGGT

>184

GTCAGCCCCACCAATATGCAAGGCTTCACCAAGAGTCTTAATGCCTTCAACGTAGGCG  
ATGACTGGTGAGGGAGGACTGGGAGTTTTGATGTCTAACAGTTAATGCCAAGCCCTT  
CAGTGAGGTCTTTTGGCAGCAGTG

>185

TGCCTTCAACGTAGGCGATGACTGGTGAGGGAGGACTGGGAGTTTTGATGTCTAACAG  
TTAATGCCAAGCCCTTCAGTGAGGTCTTTTGGCAGCAGTGGGAAGATCTCAAGGGGG  
GCCTACTTGCAATGCATCATAAT

>186

ACGTAGGCGATGACTGGTGAGGGAGGACTGGGAGTTTTGATGTCTAACAGTTAATGC  
CAAGCCCTTCAGTGAGGTCTTTTGGCAGCAGTGGGAAGATCTCAAGGGGGGCCTACTT  
GTCAATGCATCATAATTCATTTTA

>187

GTGAGGGAGGACTGGGAGTTTTGATGTCTAACAGTTAATGCCAAGCCCTTCAGTGAG  
GTCTTTTGGCAGCAGTGGGAAGATCTCAAGGGGGGCCTACTTGTCAATGCATCATAAT  
CATTTTATTTGTTTATTCAATAA

>188

CTACTTGTCAATGCATCATAATTCATTTATTTGTTTATTCAATAAATATTTATTGGTCACT  
TGTTCTAGGCAGGCCCTGTGCTAAGTGCTGGGAATGCAGTGATGAACAAAAACAAAAT  
TTAATATCGTATTTTTGCT

>189

TTGTCAATGCATCATAATTCATTTATTTGTTTATTCAATAAATATTTATTGGTCACTTGTT  
CTAGGCAGGCCCTGTGCTAAGTGCTGGGAATGCAGTGATGAACAAAAACAAAATTTTA  
ATATCGTATTTTTGCTAAGT

>190

ATAATTCATTTATTTGTTTATTCAATAAATATTTATTGGTCACTTGTTCTAGGCAGGCCCT  
GTGCTAAGTGCTGGGAATGCAGTGATGAACAAAAACAAAATTTAATATCGTATTTTTG  
CTAAGTCTTATAAAGAGGA

>191

GGCCCTGTGCTAAGTGCTGGGAATGCAGTGATGAACAAAAACAAAATTTAATATCGTA

TTTTTGCTAAGTCTTATAAAGAGGAGGTGTATGACAGATTATGAGAGTGATACGTGGA  
GGATTGTTTAGCTTGGTGGAGT

>192

TAAGTGCTGGGAATGCAGTGATGAACAAAAACAAAATTTAATATCGTATTTTTGCTAA  
GTCTTATAAAGAGGAGGTGTATGACAGATTATGAGAGTGATACGTGGAGGATTGTTTA  
GCTTGGTGGAGTGGCTGGTCGG

>193

ACAAAAACAAAATTTAATATCGTATTTTTGCTAAGTCTTATAAAGAGGAGGTGTATGAC  
AGATTATGAGAGTGATACGTGGAGGATTGTTTAGCTTGGTGGAGTGGCTGGTCGGTGG  
GGCCTCCTAGAGGAAGTAAA

>194

TAATATCGTATTTTTGCTAAGTCTTATAAAGAGGAGGTGTATGACAGATTATGAGAGTG  
ATACGTGGAGGATTGTTTAGCTTGGTGGAGTGGCTGGTCGGTGGGGCCTCCTAGAGG  
AAGTAAAGATTGAGCTGAGATC

>195

TTTTTGCTAAGTCTTATAAAGAGGAGGTGTATGACAGATTATGAGAGTGATACGTGGA  
GGATTGTTTAGCTTGGTGGAGTGGCTGGTCGGTGGGGCCTCCTAGAGGAAGTAAAGA  
TTGAGCTGAGATCTGAAAAAAGA

>196

AGATTATGAGAGTGATACGTGGAGGATTGTTTAGCTTGGTGGAGTGGCTGGTCGGTGG  
GGCCTCCTAGAGGAAGTAAAGATTGAGCTGAGATCTGAAAAAAGAGTAGAAGTAATC  
AGATGAAAGATGGTTGGAGGGTG

>197

TGAGAGTGATACGTGGAGGATTGTTTAGCTTGGTGGAGTGGCTGGTCGGTGGGGCCT  
TCCTAGAGGAAGTAAAGATTGAGCTGAGATCTGAAAAAAGAGTAGAAGTAATCAGATG  
AAAGATGGTTGGAGGGTGAGGGGA

>198

GTGTATACGTGGAGGATTGTTTAGCTTGGTGGAGTGGCTGGTCGGTGGGGCCTCCTAG  
AGGAAGTAAAGATTGAGCTGAGATCTGAAAAAAGAGTAGAAGTAATCAGATGAAAGA  
TGGTTGGAGGGTGAGGGGAGAAGT

>199

ACGTGGAGGATTGTTTAGCTTGGTGGAGTGGCTGGTCGGTGGGGCCTCCTAGAGGAA  
GTAAAGATTGAGCTGAGATCTGAAAAAAGAGTAGAAGTAATCAGATGAAAGATGGTTG  
GAGGGTGAGGGGAGAAGTATAGCA

>200

GCTTGGTGGAGTGGCTGGTCGGTGGGGCCTCCTAGAGGAAGTAAAGATTGAGCTGA  
GATCTGAAAAAAGAGTAGAAGTAATCAGATGAAAGATGGTTGGAGGGTGAGGGGAGA  
AGTATAGCAGGCAGTAGGGACAAGTG

>201

CTAGAGGAAGTAAAGATTGAGCTGAGATCTGAAAAAAGAGTAGAAGTAATCAGATGA  
AAGATGGTTGGAGGGTGAGGGGAGAAGTATAGCAGGCAGTAGGGACAAGTGCTAAGG  
GTCTGTGGTAGGACTGAGTATGACTC

>202

GAAGTAAAGATTGAGCTGAGATCTGAAAAAAGAGTAGAAGTAATCAGATGAAAGATG  
GTTGGAGGGTGAGGGGAGAAGTATAGCAGGCAGTAGGGACAAGTGCTAAGGGTCTGT  
GGTAGGACTGAGTATGACTCATTGGA

>203

AAAGATTGAGCTGAGATCTGAAAAAAGAGTAGAAGTAATCAGATGAAAGATGGTTGG  
AGGGTGAGGGGAGAAGTATAGCAGGCAGTAGGGACAAGTGCTAAGGGTCTGTGGTAG  
GACTGAGTATGACTCATTTGAGGAAC

>204

ATCTGAAAAAAGAGTAGAAGTAATCAGATGAAAGATGGTTGGAGGGTGAGGGGAGAA  
GTATAGCAGGCAGTAGGGACAAGTGCTAAGGGTCTGTGGTAGGACTGAGTATGACTCA  
TTTGAGGAACAGAAAAAAGGCCAAG

>205

GAAAGATGGTTGGAGGGTGAGGGGAGAAGTATAGCAGGCAGTAGGGACAAGTGCTAA  
GGGTCTGTGGTAGGACTGAGTATGACTCATTTGAGGAACAGAAAAAAGGCCAAGTGC  
AGAGTATGAAGAGGAGGTGAACTGAA

>206

GGTTGGAGGGTGAGGGGAGAAGTATAGCAGGCAGTAGGGACAAGTGCTAAGGGTCTG  
TGGTAGGACTGAGTATGACTCATTTGAGGAACAGAAAAAAGGCCAAGTGCAGAGTAT  
GAAGAGGAGGTGAACTGAATTGAGGC

>207

GGAGAAGTATAGCAGGCAGTAGGGACAAGTGCTAAGGGTCTGTGGTAGGACTGAGTAT  
GACTCATTTGAGGAACAGAAAAAAGGCCAAGTGCAGAGTATGAAGAGGAGGTGAACT  
GAATTGAGGCTAAAGAAATAGGACC

>208

GTATAGCAGGCAGTAGGGACAAGTGCTAAGGGTCTGTGGTAGGACTGAGTATGACTCA  
TTTGAGGAACAGAAAAAAGGCCAAGTGCAGAGTATGAAGAGGAGGTGAACTGAATTG  
AGGCTAAAGAAATAGGACCTTTTAA

>209

AAGGGTCTGTGGTAGGACTGAGTATGACTCATTTGAGGAACAGAAAAAAGGCCAAGT  
GCAGAGTATGAAGAGGAGGTGAACTGAATTGAGGCTAAAGAAATAGGACCTTTTAA  
AGCAAACAGCTCTATTATGAATTGGG

>210

AGTATGACTCATTTGAGGAACAGAAAAAAGGCCAAGTGCAGAGTATGAAGAGGAGGT  
GAACTGAATTGAGGCTAAAGAAATAGGACCTTTTAAAGCAAACAGCTCTATTATGAAT  
TGGGGTTTTTACCCGTAGAGTATA

>211

CTCATTTGAGGAACAGAAAAAAGGCCAAGTGCAGAGTATGAAGAGGAGGTGAACTGA  
ATTGAGGCTAAAGAAATAGGACCTTTTAAAGCAAACAGCTCTATTATGAATTGGGGTT  
TTTACCCGTAGAGTATAGGGAAGC

>212

AAAGGCCAAGTGCAGAGTATGAAGAGGAGGTGAACTGAATTGAGGCTAAAGAAATAG  
GACCTTTTAAAGCAAACAGCTCTATTATGAATTGGGGTTTTTACCCGTAGAGTATAGG  
GAAGCTATCAAAGTGTAAAAA

>213

ATTGAGGCTAAAGAAATAGGACCTTTTAAAGCAAACAGCTCTATTATGAATTGGGGTT  
TTTACCCGTAGAGTATAGGGAAGCTATCAAAGTGTAAAAAAGCAAGGGATCTTAAGA  
GGGCTATGGGCAAGTAAAAA

>214

TGAGGCTAAAGAAATAGGACCTTTTAAAGCAAACAGCTCTATTATGAATTGGGGTTTT

TACCCGTAGAGTATAGGGAAGCTATCAAAGTGTTTTAAAAAGCAAGGGATCTTAAGAG  
GGCTATGGGCAAGTTAAAAAAC

>215

CCTTTTAAAAGCAAACAGCTCTATTATGAATTGGGGTTTTTACCCGTAGAGTATAGGGA  
AGCTATCAAAGTGTTTTAAAAAGCAAGGGATCTTAAGAGGGCTATGGGCAAGTTAAAA  
AAACAAAAAAAACAACGAAGGAG

>216

TGAATTGGGGTTTTTACCCGTAGAGTATAGGGAAGCTATCAAAGTGTTTTAAAAAGCAA  
GGGATCTTAAGAGGGCTATGGGCAAGTTAAAAAACAAAAAAAACAACGAAGGAGTG  
GTTTGATATCATTAGGTTTACATT

>217

AATTGGGGTTTTTACCCGTAGAGTATAGGGAAGCTATCAAAGTGTTTTAAAAAGCAA  
GGATCTTAAGAGGGCTATGGGCAAGTTAAAAAACAAAAAAAACAACGAAGGAGTGG  
TTTGATATCATTAGGTTTACATTGA

>218

ACCCGTAGAGTATAGGGAAGCTATCAAAGTGTTTTAAAAAGCAAGGGATCTTAAGAGG  
GCTATGGGCAAGTTAAAAAACAAAAAAAACAACGAAGGAGTGTTTGATATCATTAG  
GTTTACATTGAGCTTGTATCATCC

>219

AAGTGTTTTAAAAAGCAAGGGATCTTAAGAGGGCTATGGGCAAGTTAAAAAACAAA  
AAAAACAACGAAGGAGTGGTTTGATATCATTAGGTTTACATTGAGCTTGTATCATCCAT  
AGAAGAGTCAGGGTTAGACCCTCT

>220

GATCTTAAGAGGGCTATGGGCAAGTTAAAAAACAAAAAAAACAACGAAGGAGTGGT  
TTGATATCATTAGGTTTACATTGAGCTTGTATCATCCATAGAAGAGTCAGGGTTAGACCC  
TCTGGGGAAGAGAGTGGACAACA

>221

GCTATGGGCAAGTTAAAAAACAAAAAAAACAACGAAGGAGTGGTTTGATATCATTAG  
GTTTACATTGAGCTTGTATCATCCATAGAAGAGTCAGGGTTAGACCCTCTGGGGAAGAG  
AGTGGACAACAAAGATAAGCCAC

>222

AAAAACAAAAAAAACAACGAAGGAGTGGTTTGATATCATTAGGTTTACATTGAGCTTG  
TATCATCCATAGAAGAGTCAGGGTTAGACCCTCTGGGGAAGAGAGTGGACAACAAAGA  
TAAGCCACACTCTACTCTATATCC

>223

TTGATATCATTAGGTTTACATTGAGCTTGTATCATCCATAGAAGAGTCAGGGTTAGACCC  
TCTGGGGAAGAGAGTGGACAACAAAGATAAGCCACACTCTACTCTATATCCATGAAAA  
AATAGTAACCATCACAGCTACC

>224

GATATCATTAGGTTTACATTGAGCTTGTATCATCCATAGAAGAGTCAGGGTTAGACCCCT  
TGGGGAAGAGAGTGGACAACAAAGATAAGCCACACTCTACTCTATATCCATGAAAAAA  
TAGTAACCATCACAGCTACCAG

>225

TACATTGAGCTTGTATCATCCATAGAAGAGTCAGGGTTAGACCCTCTGGGGAAGAGAG  
TGGACAACAAAGATAAGCCACACTCTACTCTATATCCATGAAAAAATAGTAACCATCAC  
AGCTACCAGTTGCTCAATTCTAC

>226

TAGACCCCTCTGGGGAAGAGAGTGGACAACAAAGATAAGCCACACTCTACTCTATATCC  
ATGAAAAAATAGTAACCATCACAGCTACCAGTTGCTCAATTCTACTTACTTTTGTTTTAA  
AACTTTTTATTAGGGAAAATTT

>227

GGAAGAGAGTGGACAACAAAGATAAGCCACACTCTACTCTATATCCATGAAAAAATAG  
TAACCATCACAGCTACCAGTTGCTCAATTCTACTTACTTTTGTTTTAACTTTTTATTAG  
GGAAAATTTCAAAAATTTCTG

>228

AGTGGACAACAAAGATAAGCCACACTCTACTCTATATCCATGAAAAAATAGTAACCATC  
ACAGCTACCAGTTGCTCAATTCTACTTACTTTTGTTTTAACTTTTTATTAGGGAAAAT  
TTCAAAAATTTCTGAAAGTGA

>229

AAAAAATAGTAACCATCACAGCTACCAGTTGCTCAATTCTACTTACTTTTGTTTTAAAC  
TTTTTATTAGGGAAAATTTCAAAAATTTCTGAAAGTGAAGTAGTGACCTCCCAT  
ACGTCCATCACCTAGCTTCAA

>230

CAGTTGCTCAATTCTACTTACTTTTGTTTTAACTTTTTATTAGGGAAAATTTCAAAAA  
TTTCTGAAAGTGAAGTAGTGACCTCCCATACGTCCATCACCTAGCTTCAACGCT  
TATGAGCAAATGGCCACTCTT

>231

GCTCAATTCTACTTACTTTTGTTTTAACTTTTTATTAGGGAAAATTTCAAAAATTTCTG  
AAAGTGAAGTAGTGACCTCCCATACGTCCATCACCTAGCTTCAACGCTTATGAG  
CAAATGGCCACTCTTTTTTTT

>232

AAAAATTTCTGAAAGTGAAGTAGTGACCTCCCATACGTCCATCACCTAGCTTCA  
ACGCTTATGAGCAAATGGCCACTCTTTTTTTTTTTTTTTTTTTTTTTGAGACAGAGTCTCA  
CTCTGTAGCCCAGGCTGGAGT

>233

TACGTCCATCACCTAGCTTCAACGCTTATGAGCAAATGGCCACTCTTTTTTTTTTTTTTT  
TTTTTTTGGAGACAGAGTCTCACTCTGTAGCCCAGGCTGGAGTGCAGTGGTGCAGTCTT  
GGCTCACTGCAACCTCTGCCTC

>234

CAACGCTTATGAGCAAATGGCCACTCTTTTTTTTTTTTTTTTTTTTTTTGAGACAGAGTCT  
CACTCTGTAGCCCAGGCTGGAGTGCAGTGGTGCAGTCTTGGCTCACTGCAACCTCTGC  
CTCCTGGGTTCAAGCGATTCTC

>235

CTTATGAGCAAATGGCCACTCTTTTTTTTTTTTTTTTTTTTTTTGAGACAGAGTCTCACTC  
TGAGCCCAGGCTGGAGTGCAGTGGTGCAGTCTTGGCTCACTGCAACCTCTGCCTCCT  
GGGTTCAAGCGATTCTCATGCC

>236

CTTTTTTTTTTTTTTTTTTTTTTTGAGACAGAGTCTCACTCTGTAGCCCAGGCTGGAGTGC  
AGTGGTGCAGTCTTGGCTCACTGCAACCTCTGCCTCCTGGGTTCAAGCGATTCTCATGC  
CTCAGACTCCCAGTAGCTGG

>237

CTCTGTAGCCCAGGCTGGAGTGCAGTGGTGCAGTCTTGGCTCACTGCAACCTCTGCCT

CCTGGGTTCAAGCGATTCTCATGCCTCAGACTCCCGAGTAGCTGGGATTACAGGCGCC  
TGCCACCATGCCTGGCTAATTTTT

>238

GAGTGCAGTGGTGCAGTCTTGGCTCACTGCAACCTCTGCCTCCTGGGTTCAAGCGATT  
CTCATGCCTCAGACTCCCGAGTAGCTGGGATTACAGGCGCCTGCCACCATGCCTGGCTA  
ATTTTTGTATGTTTAGTAGAGAT

>239

CACTGCAACCTCTGCCTCCTGGGTTCAAGCGATTCTCATGCCTCAGACTCCCGAGTAGC  
TGGGATTACAGGCGCCTGCCACCATGCCTGGCTAATTTTTGTATGTTTAGTAGAGATGG  
GGTTTCACTATGTTGGTCAAGC

>240

GCCTCAGACTCCCGAGTAGCTGGGATTACAGGCGCCTGCCACCATGCCTGGCTAATTTT  
TGATGTTTAGTAGAGATGGGGTTTCACTATGTTGGTCAAGCTGGTTTTGAACTCCCGA  
CCTCAGGTGATTCACCAGCCTC

>241

TCAGACTCCCGAGTAGCTGGGATTACAGGCGCCTGCCACCATGCCTGGCTAATTTTTGT  
ATGTTTAGTAGAGATGGGGTTTCACTATGTTGGTCAAGCTGGTTTTGAACTCCCGACCT  
CAGGTGATTCACCAGCCTCAGC

>242

GGCGCCTGCCACCATGCCTGGCTAATTTTTGTATGTTTAGTAGAGATGGGGTTTCACTAT  
GTTGGTCAAGCTGGTTTTGAACTCCCGACCTCAGGTGATTCACCAGCCTCAGCCTCCA  
AAAGTGCTGGGATTACAGACGT

>243

ATTTTTGTATGTTTAGTAGAGATGGGGTTTCACTATGTTGGTCAAGCTGGTTTTGAACTC  
CCGACCTCAGGTGATTCACCAGCCTCAGCCTCCAAAAGTGCTGGGATTACAGACGTGA  
GCCATCGCACTCAGCTGAGCAA

>244

TTAGTAGAGATGGGGTTTCACTATGTTGGTCAAGCTGGTTTTGAACTCCCGACCTCAGG  
TGATTCACCAGCCTCAGCCTCCAAAAGTGCTGGGATTACAGACGTGAGCCATCGCACT  
CAGCTGAGCAAGTGGCCACTCTT

>245

CAAGCTGGTTTTGAACTCCCGACCTCAGGTGATTCACCAGCCTCAGCCTCCAAAAGTG  
CTGGGATTACAGACGTGAGCCATCGCACTCAGCTGAGCAAGTGGCCACTCTTACTTCA  
TCTATACTCCCTCATGTTAGATTG

>246

GTTTTGAACTCCCGACCTCAGGTGATTCACCAGCCTCAGCCTCCAAAAGTGCTGGGAT  
TACAGACGTGAGCCATCGCACTCAGCTGAGCAAGTGGCCACTCTTACTTCATCTATACT  
CCCTCATGTTAGATTGTTTTAAA

>247

GACCTCAGGTGATTCACCAGCCTCAGCCTCCAAAAGTGCTGGGATTACAGACGTGAGC  
CATCGCACTCAGCTGAGCAAGTGGCCACTCTTACTTCATCTATACTCCCTCATGTTAGAT  
TGTTTTAAAGCAGATCCTAGAT

>248

ACAGACGTGAGCCATCGCACTCAGCTGAGCAAGTGGCCACTCTTACTTCATCTATACTC  
CCTCATGTTAGATTGTTTTAAAGCAGATCCTAGATGTTATATCCTTTTATCCATAAATATT  
TATTATGTATCTCTAAATG



>249

CATCGCACTCAGCTGAGCAAGTGGCCACTCTTACTTCATCTATACTCCCTCATGTTAGAT  
TGTTTTAAAGCAGATCCTAGATGTTATATCCTTTTATCCATAAATATTTTATTATGTATCTC  
TAAATGATACTCTTTTAA

>250

ATGTTATATCCTTTTATCCATAAATATTTTATTATGTATCTCTAAATGATACTCTTTTAAAAA  
AACATAGTATCATTATCAAACCTAAAAAGTTAACAGTGATTCCCTAATGTCATCAAATAT  
GGATCAATATTCAAATT

>251

AATATTTTATTATGTATCTCTAAATGATACTCTTTTAAAAAACATAGTATCATTATCAAAC  
CTAAAAAGTTAACAGTGATTCCCTAATGTCATCAAATATGGATCAATATTCAAATTTCTG  
CAGTTGTCTCATAATTAT

>252

TATTATGTATCTCTAAATGATACTCTTTTAAAAAACATAGTATCATTATCAAACCTAAAA  
AGTTAACAGTGATTCCCTAATGTCATCAAATATGGATCAATATTCAAATTTCTGCAGTTG  
TCTCATAATTATTTTGTAG

>253

ATCAAACCTAAAAAGTTAACAGTGATTCCCTAATGTCATCAAATATGGATCAATATTCAA  
ATTTCTGCAGTTGTCTCATAATTATTTTGTAGCTAATTTAAATCCAGATCTAAACAAGGT  
CTATACAGTGCATTTGGTTG

>254

TGATTCCCTAATGTCATCAAATATGGATCAATATTCAAATTTCTGCAGTTGTCTCATAATT  
ATTTTGTAGCTAATTTAAATCCAGATCTAAACAAGGTCTATACAGTGCATTTGGTTGATA  
TGCTCTTAAGACTTTTAA

>255

ATCAAATATGGATCAATATTCAAATTTCTGCAGTTGTCTCATAATTATTTTGTAGCTAATTT  
AAATCCAGATCTAAACAAGGTCTATACAGTGCATTTGGTTGATATGTCTCTTAAGACTTT  
TAATTTGTAGCTTTTCTG

>256

AAATTTCTGCAGTTGTCTCATAATTATTTTGTAGCTAATTTAAATCCAGATCTAAACAAG  
GTCTATACAGTGCATTTGGTTGATATGTCTCTTAAGACTTTTAAATTTGTAGCTTTTCTGTC  
ACCCCCTGAATTTATTTT

>257

TTTTGTAGCTAATTTAAATCCAGATCTAAACAAGGTCTATACAGTGCATTTGGTTGATAT  
GTCTCTTAAGACTTTTAAATTTGTAGCTTTTCTGTCACCCCCTGAATTTATTTCTTGAAG  
AAACCAGGTTGTTGATCCTG

>258

AAATCCAGATCTAAACAAGGTCTATACAGTGCATTTGGTTGATATGTCTCTTAAGACTTT  
TAATTTGTAGCTTTTCTGTCACCCCCTGAATTTATTTCTTGAAGAAACCAGGTTGTTGA  
TCCTGTAGAATTTCTTATGA

>259

TGGTTGATATGTCTCTTAAGACTTTTAAATTTGTAGCTTTTCTGTCACCCCCTGAATTTAT  
TTCTTGAAGAAACCAGGTTGTTGATCCTGTAGAATTTCTTATGATAGCTACCATTTACTG  
AGTGCTTACTCTGCTAGGT

>260

TATGTCTCTTAAGACTTTTAAATTTGTAGCTTTTCTGTCACCCCCTGAATTTATTTCTTGA

AGAAACCAGGTTGTTGATCCTGTAGAATTTCTTATGATAGCTACCATTTACTGAGTGCTT  
ACTCTGCTAGGTATTATGC

>261

TTCTGTCACCCCTTGAATTTATTTCTTGAAGAAACCAGGTTGTTGATCCTGTAGAATTT  
CTTATGATAGCTACCATTTACTGAGTGCTTACTCTGCTAGGTATTATGCCAAGGGTTGCT  
GGTAAATCCACTTAATTCTC

>262

GAATTTATTTCTTGAAGAAACCAGGTTGTTGATCCTGTAGAATTTCTTATGATAGCTACC  
ATTTACTGAGTGCTTACTCTGCTAGGTATTATGCCAAGGGTTGCTGGTAAATCCACTTAA  
TTCTCATACCAATCCTTAGA

>263

AGAAACCAGGTTGTTGATCCTGTAGAATTTCTTATGATAGCTACCATTTACTGAGTGCTT  
ACTCTGCTAGGTATTATGCCAAGGGTTGCTGGTAAATCCACTTAATTCTCATACCAATCC  
TTAGATGTATTATAATAGAC

>264

GTGCTTACTCTGCTAGGTATTATGCCAAGGGTTGCTGGTAAATCCACTTAATTCTCATAC  
CAATCCTTAGATGTATTATAATAGACCTTTTTCTGATGTTATATATAAGTAAATTGAGGTTT  
GGGAATATCTAGGTAAT

>265

AGGTATTATGCCAAGGGTTGCTGGTAAATCCACTTAATTCTCATACCAATCCTTAGATGT  
ATTATAATAGACCTTTTTCTGATGTTATATATAAGTAAATTGAGGTTTGGGAATATCTAGG  
TAACTTAGCCGTAGTCACA

>266

AAATCCACTTAATTCTCATACCAATCCTTAGATGTATTATAATAGACCTTTTTCTGATGTT  
ATATATAAGTAAATTGAGGTTTGGGAATATCTAGGTAACCTAGCCGTAGTCACATAACTG  
GTCATTGGAGGGGGCATGA

>267

TAATTCTCATACCAATCCTTAGATGTATTATAATAGACCTTTTTCTGATGTTATATATAAGT  
AAATTGAGGTTTGGGAATATCTAGGTAACCTAGCCGTAGTCACATAACTGGTCATTGGA  
GGGGGCATGATCCAGATCC

>268

CCTTAGATGTATTATAATAGACCTTTTTCTGATGTTATATATAAGTAAATTGAGGTTTGGG  
AATATCTAGGTAACCTAGCCGTAGTCACATAACTGGTCATTGGAGGGGGCATGATCCAG  
ATCCCGGGTTTTTAAACCAC

>269

AATAGACCTTTTTCTGATGTTATATATAAGTAAATTGAGGTTTGGGAATATCTAGGTAACCT  
TAGCCGTAGTCACATAACTGGTCATTGGAGGGGGCATGATCCAGATCCCGGGTTTTTAA  
ACCACTAATCTGTTTTCTG

>270

ATATATAAGTAAATTGAGGTTTGGGAATATCTAGGTAACCTAGCCGTAGTCACATAACTG  
GTCATTGGAGGGGGCATGATCCAGATCCCGGGTTTTTAAACCACTAATCTGTTTTCTG  
AAAGATCTTAATGACAGAAGC

>271

TGAGGTTTGGGAATATCTAGGTAACCTAGCCGTAGTCACATAACTGGTCATTGGAGGGG  
GCATGATCCAGATCCCGGGTTTTTAAACCACTAATCTGTTTTCTGAAAGATCTTAATGA  
CAGAAGCAGCCAGGGCTGTAG

>272

ATAACTGGTCATTGGAGGGGGCATGATCCAGATCCCGGGTTTTTAAACCACTAATCTGT  
TTTCTGAAAGATCTTAATGACAGAAGCAGCCAGGGCTGTAGGATAGAGGCCAACTCA  
TTAGGCTGGCATTGGCACCTTTC

>273

GGAGGGGGCATGATCCAGATCCCGGGTTTTTAAACCACTAATCTGTTTTCTGAAAGAT  
CTTAATGACAGAAGCAGCCAGGGCTGTAGGATAGAGGCCAACTCATTAGGCTGGCATT  
GGCACCTTCCAACCTTATCCCT

>274

GGGGGCATGATCCAGATCCCGGGTTTTTAAACCACTAATCTGTTTTCTGAAAGATCTT  
AATGACAGAAGCAGCCAGGGCTGTAGGATAGAGGCCAACTCATTAGGCTGGCATTGGC  
ACCTTCCAACCTTATCCCTACA

>275

ATCCCGGGTTTTTAAACCACTAATCTGTTTTCTGAAAGATCTTAATGACAGAAGCAGC  
CAGGGCTGTAGGATAGAGGCCAACTCATTAGGCTGGCATTGGCACCTTCCAACCTTAT  
CCCTACACCTCAGCTGCACAGG

>276

TAATCTGTTTTCTGAAAGATCTTAATGACAGAAGCAGCCAGGGCTGTAGGATAGAGG  
CCAACCTCATTAGGCTGGCATTGGCACCTTCCAACCTTATCCCTACACCTCAGCTGCAC  
AGGATGCCTTCTGGAATGCCCT

>277

GGGCTGTAGGATAGAGGCCAACTCATTAGGCTGGCATTGGCACCTTCCAACCTTATCC  
CTACACCTCAGCTGCACAGGATGCCTTCTGGAATGCCCTTAGTTCTCTATTCAACCTC  
TTCAAGGCCTTCTCAGCCTTCA

>278

GGATAGAGGCCAACTCATTAGGCTGGCATTGGCACCTTCCAACCTTATCCCTACACCT  
CAGCTGCACAGGATGCCTTCTGGAATGCCCTTAGTTCTCTATTCAACCTTCAAGGC  
CTTCTCAGCCTTACACCATCT

>279

TATCCCTACACCTCAGCTGCACAGGATGCCTTCTGGAATGCCCTTAGTTCTCTATTCAA  
CCTCTTCAAGGCCTTCTCAGCCTTACACCATCTCCATGAAACCTTCTTGACCACACC  
AGCCCATAGAGCTCTGTCTTG

>280

CCTCAGCTGCACAGGATGCCTTCTGGAATGCCCTTAGTTCTCTATTCAACCTTCAA  
GGCCTTCTCAGCCTTACACCATCTCCATGAAACCTTCTTGACCACACCAGCCCATAG  
AGCTCTGTCTTGACACACTGC

>281

TCTATTCAACCTTCAAGGCCTTCTCAGCCTTACACCATCTCCATGAAACCTTCTTG  
ACCACACCAGCCCATAGAGCTCTGTCTTGACACACTGCACTGCTCATTGGTGTTTCAG  
TCACATGCTGTTGGGGAGGT

>282

AACCTTCAAGGCCTTCTCAGCCTTACACCATCTCCATGAAACCTTCTTGACCACA  
CCAGCCCATAGAGCTCTGTCTTGACACACTGCACTGCTCATTGGTGTTTCAGTCACAT  
GCTGTTGGGGAGGTTCTTGT

>283

AACCTTCTTGACCACACCAGCCCATAGAGCTCTGTCTTGACACACTGCACTGCTCAT

TTGGTGTTTCAGTCACATGCTGTTTGGGGAGGTTTCTTGTTTTTTTGTAGTATTCCTGCT  
GTTATTTCTGAGCTCACTTTC

>284

AGCCCATAGAGCTCTGTCTTGCACACACTGCACTGCTCATTTGGTGTTTCAGTCACATGC  
TGTTTGGGGAGGTTTCTTGTTTTTTTGTAGTATTCCTGCTGTTATTTCTGAGCTCACTTT  
CTAGCTCTGTGAATACAGGG

>285

GCACACACTGCACTGCTCATTTGGTGTTTCAGTCACATGCTGTTTGGGGAGGTTTCTTG  
TTTTTTGTAGTATTCCTGCTGTTATTTCTGAGCTCACTTTCTAGCTCTGTGAATACAGG  
GTCAGCCCTTACGCCCACTG

>286

GGTGTTTCAGTCACATGCTGTTTGGGGAGGTTTCTTGTTTTTTTGTAGTATTCCTGCTGT  
TATTTCTGAGCTCACTTTCTAGCTCTGTGAATACAGGGTCAGCCCTTACGCCCACTGG  
GGTCCCGTAGATGCTCTTTGT

>287

CATGCTGTTTGGGGAGGTTTCTTGTTTTTTTGTAGTATTCCTGCTGTTATTTCTGAGCTC  
ACTTTCTAGCTCTGTGAATACAGGGTCAGCCCTTACGCCCACTGGGGTCCCGTAGATG  
CTCTTTGTGCGATTAGGGAA

>288

AGGTTTCTTGTTTTTTTGTAGTATTCCTGCTGTTATTTCTGAGCTCACTTTCTAGCTCTG  
TGAATACAGGGTCAGCCCTTACGCCCACTGGGGTCCCGTAGATGCTCTTTGTGCGATT  
AGGGAATGCTAATTAGAATA

>289

TTATTTCTGAGCTCACTTTCTAGCTCTGTGAATACAGGGTCAGCCCTTACGCCCACTG  
GGGTCCCGTAGATGCTCTTTGTGCGATTAGGGAATGCTAATTAGAATACTATCTCTGGGC  
TATTTATGCTGCATCAGTCTT

>290

CTAGCTCTGTGAATACAGGGTCAGCCCTTACGCCCACTGGGGTCCCGTAGATGCTCTT  
TGTCGATTAGGGAATGCTAATTAGAATACTATCTCTGGGCTATTTATGCTGCATCAGTC  
TTCCTGTCAAACAAGTTACAG

>291

ACAGGGTCAGCCCTTACGCCCACTGGGGTCCCGTAGATGCTCTTTGTGCGATTAGGG  
AATGCTAATTAGAATACTATCTCTGGGCTATTTATGCTGCATCAGTCTTCTGTCAAACA  
AGTTACAGTTGTGCTTATCTGT

>292

GTAGATGCTCTTTGTGCGATTAGGGAATGCTAATTAGAATACTATCTCTGGGCTATTTATG  
CTGCATCAGTCTTCTGTCAAACAAGTTACAGTTGTGCTTATCTGTATTTCCGATGAGAA  
TCAGGAATTTTCTTCTGT

>293

GATTAGGGAATGCTAATTAGAATACTATCTCTGGGCTATTTATGCTGCATCAGTCTTCTG  
TCAAACAAGTTACAGTTGTGCTTATCTGTATTTCCGATGAGAATCAGGAATTTTCTTCT  
GTTAATGAATTTCTGATT

>294

GGGCTATTTATGCTGCATCAGTCTTCTGTCAAACAAGTTACAGTTGTGCTTATCTGTAT  
TCCGATGAGAATCAGGAATTTTCTTCTGTTAATGAATTTCTGATTGGTTCAAAGTA  
TTCTAACATAAGTAGCCAAA

>295

TTTATGCTGCATCAGTCTTCCTGTCAAACAAGTTACAGTTGTGCTTATCTGTATTCCGA  
TGAGAATCAGGAATTTTCTTCTGTTAATGAATTTCTGATTGGTTCAAAGTATTCTAA  
CATAAGTAGCCAAATTGTAC

>296

GCTTATCTGTATTTCCGATGAGAATCAGGAATTTTCTTCTGTTAATGAATTTCTGATTG  
GTTTCAAAGTATTCTAACATAAGTAGCCAAATTGTACTATAGGCCTTTAAATGAAAAAA  
ATAAAAAAGTAGTCCCAAGC

>297

CCGATGAGAATCAGGAATTTTCTTCTGTTAATGAATTTCTGATTGGTTCAAAGTATT  
CTAACATAAGTAGCCAAATTGTACTATAGGCCTTTAAATGAAAAAATAAAAAAGTAGT  
CCCAAGCCGGGCGCAGTGGCT

>298

ATGAGAATCAGGAATTTTCTTCTGTTAATGAATTTCTGATTGGTTCAAAGTATTCTA  
ACATAAGTAGCCAAATTGTACTATAGGCCTTTAAATGAAAAAATAAAAAAGTAGTCCC  
AAGCCGGGCGCAGTGGCTCAC

>299

TTTCTTCTGTTAATGAATTTCTGATTGGTTCAAAGTATTCTAACATAAGTAGCCAAATT  
GTACTATAGGCCTTTAAATGAAAAAATAAAAAAGTAGTCCCAAGCCGGGCGCAGTGG  
CTCACGCCTGTAATCCCAGCA

>300

TGGTTTCAAAGTATTCTAACATAAGTAGCCAAATTGTACTATAGGCCTTTAAATGAAAA  
AAATAAAAAAGTAGTCCCAAGCCGGGCGCAGTGGCTCACGCCTGTAATCCCAGCACTT  
TCGGAGGCCGAGGCGGGTGGACC

>301

ATAAGTAGCCAAATTGTACTATAGGCCTTTAAATGAAAAAATAAAAAAGTAGTCCCAA  
GCCGGGCGCAGTGGCTCACGCCTGTAATCCCAGCACTTTCGGAGGCCGAGGCGGGTG  
GACCACCTAAGGTCAGGAGTTCAA

>302

AGGCCTTTAAATGAAAAAATAAAAAAGTAGTCCCAAGCCGGGCGCAGTGGCTCACG  
CCTGTAATCCCAGCACTTTCGGAGGCCGAGGCGGGTGGACCACCTAAGGTCAGGAGTT  
CAAGACCAGCCTGGCCAACATGGTG

>303

TGAAAAAATAAAAAAGTAGTCCCAAGCCGGGCGCAGTGGCTCACGCCTGTAATCCC  
AGCACTTTCGGAGGCCGAGGCGGGTGGACCACCTAAGGTCAGGAGTTCAAGACCAGC  
CTGGCCAACATGGTGAAACCCCATCT

>304

GGGCGCAGTGGCTCACGCCTGTAATCCCAGCACTTTCGGAGGCCGAGGCGGGTGGAC  
CACCTAAGGTCAGGAGTTCAAGACCAGCCTGGCCAACATGGTGAAACCCCATCTCTAC  
TAAAAATACAAAAATTAGTCATGTG

>305

CGCAGTGGCTCACGCCTGTAATCCCAGCACTTTCGGAGGCCGAGGCGGGTGGACCAC  
CTAAGGTCAGGAGTTCAAGACCAGCCTGGCCAACATGGTGAAACCCCATCTCTACTAA  
AAATACAAAAATTAGTCATGTGTGG

>306

GGCTCACGCCTGTAATCCCAGCACTTTCGGAGGCCGAGGCGGGTGGACCACCTAAGGT

CAGGAGTTCAAGACCAGCCTGGCCAACATGGTGAAACCCCATCTCTACTAAAAATACA  
AAAATTAGTCATGTGTGGTGGCAC

>307

AGGTCAGGAGTTCAAGACCAGCCTGGCCAACATGGTGAAACCCCATCTCTACTAAAA  
TACAAAAATTAGTCATGTGTGGTGGCACGTGCCTGTAGTCCCAGCTACTCCAGGAGGC  
TGAGGCAGGAGAATTGCTTGAACC

>308

CCAACATGGTGAAACCCCATCTCTACTAAAAATACAAAAATTAGTCATGTGTGGTGGCA  
CGTGCCTGTAGTCCCAGCTACTCCAGGAGGCTGAGGCAGGAGAATTGCTTGAACCCGG  
GAGTTGGAGGTTGCAGTGACCTG

>309

CCCATCTCTACTAAAAATACAAAAATTAGTCATGTGTGGTGGCACGTGCCTGTAGTCCC  
AGCTACTCCAGGAGGCTGAGGCAGGAGAATTGCTTGAACCCGGGAGTTGGAGGTTGC  
AGTGACCTGAGATTGCACCACTGC

>310

AAAATACAAAAATTAGTCATGTGTGGTGGCACGTGCCTGTAGTCCCAGCTACTCCAGG  
AGGCTGAGGCAGGAGAATTGCTTGAACCCGGGAGTTGGAGGTTGCAGTGACCTGAGA  
TTGCACCACTGCACTCCAGCCTGGG

>311

ATACAAAAATTAGTCATGTGTGGTGGCACGTGCCTGTAGTCCCAGCTACTCCAGGAGG  
CTGAGGCAGGAGAATTGCTTGAACCCGGGAGTTGGAGGTTGCAGTGACCTGAGATTG  
CACCACTGCACTCCAGCCTGGGCAA

>312

GTGGTGGCACGTGCCTGTAGTCCCAGCTACTCCAGGAGGCTGAGGCAGGAGAATTGCT  
TGAACCCGGGAGTTGGAGGTTGCAGTGACCTGAGATTGCACCACTGCACTCCAGCCT  
GGGCAACAGAGTGAGACTCTGTCTT

>313

CCTGTAGTCCCAGCTACTCCAGGAGGCTGAGGCAGGAGAATTGCTTGAACCCGGGAG  
TTGGAGGTTGCAGTGACCTGAGATTGCACCACTGCACTCCAGCCTGGGCAACAGAGT  
GAGACTCTGTCTTAAAAAAAAAAAAAA

>314

AGGCAGGAGAATTGCTTGAACCCGGGAGTTGGAGGTTGCAGTGACCTGAGATTGCAC  
CACTGCACTCCAGCCTGGGCAACAGAGTGAGACTCTGTCTTAAAAAAAAAAAAAA  
AAAAATTCCAGACCTCTCCTTTTCAC

>315

TGCTTGAACCCGGGAGTTGGAGGTTGCAGTGACCTGAGATTGCACCACTGCACTCCAG  
CCTGGGCAACAGAGTGAGACTCTGTCTTAAAAAAAAAAAAAAATTCCAGAC  
CTCTCCTTTTCACCCATAAATCCCT

>316

ACCACTGCACTCCAGCCTGGGCAACAGAGTGAGACTCTGTCTTAAAAAAAAAAAAAA  
AAAAAAATTCCAGACCTCTCCTTTTCACCCATAAATCCCTCTGCCAGTGACAGCCACT  
TTCAGCTCCTTTCCCTATGTCTT

>317

TCTGTCTTAAAAAAAAAAAAAAATTCCAGACCTCTCCTTTTCACCCATAAAT  
CCCTCTGCCAGTGACAGCCACTTTCAGCTCCTTTCCCTATGTCTTCTGGTATTTACCT  
TTGGATTTCTAATAATAATAA

>318

TTAAAAAAAAAAAAAAAAAAAAAATTCCAGACCTCTCCTTTTCACCCATAAATCCCTCT  
GCCCAGTGACAGCCACTTTTCAGCTCCTTCCCTATGTCTTCTGGTATTACCTTTGGAT  
TTCTAAATAATAATAATATTA

>319

GGTATTACCTTTGGATTCTAAATAATAATAATTAATTGACTGTTATTACTAATCTGTA  
ATCCTTAGGTAACCTGTTATATACTAGGACTGTTCTAAGTGCTTACAGCCATTAGCT  
TATTTAATCTCAACAAC

>320

AAATAATAATAATTAATTGACTGTTATTACTAATCTGTAATCCTTAGGTAACCTGTTA  
TATACTAGGACTGTTCTAAGTGCTTACAGCCATTAGCTTATTTAATCTCAACAACCCCT  
ATGAAGCAGGGTCTATT

>321

TGTTATTACTAATCTGTAATCCTTAGGTAACCTGTTATATACTAGGACTGTTCTAAGT  
GCTTTACAGCCATTAGCTTATTTAATCTCAACAACCCCTATGAAGCAGGGTCTATTATTG  
TGCCTTTTACCGATGAGG

>322

ACTAATCTGTAATCCTTAGGTAACCTGTTATATACTAGGACTGTTCTAAGTGCTTAC  
AGCCATTAGCTTATTTAATCTCAACAACCCCTATGAAGCAGGGTCTATTATTGTGCCTT  
TTACCGATGAGGACACTTA

>323

TTATACTAGGACTGTTCTAAGTGCTTACAGCCATTAGCTTATTTAATCTCAACAACC  
CCTATGAAGCAGGGTCTATTATTGTGCCTTTTACCGATGAGGACACTTAAGCACAGAA  
AGGTTAAACAGTTTGTACAA

>324

GCCATTAGCTTATTTAATCTCAACAACCCCTATGAAGCAGGGTCTATTATTGTGCCTTTT  
ACCGATGAGGACACTTAAGCACAGAAAGGTTAAACAGTTTGTACAACCTCACTATCAT  
TAGTAGGTGTTAAAGAACCTA

>325

TATTTAATCTCAACAACCCCTATGAAGCAGGGTCTATTATTGTGCCTTTTACCGATGAG  
GACACTTAAGCACAGAAAGGTTAAACAGTTTGTACAACCTCACTATCATTAGTAGGTGT  
TAAAGAACCTAGGTAGTCTAG

>326

CCTATGAAGCAGGGTCTATTATTGTGCCTTTTACCGATGAGGACACTTAAGCACAGAA  
AGGTTAAACAGTTTGTACAACCTCACTATCATTAGTAGGTGTTAAAGAACCTAGGTAGT  
CTAGCTCCAGAATCGGTGCTTG

>327

TGCCTTTTACCGATGAGGACACTTAAGCACAGAAAGGTTAAACAGTTTGTACAACCT  
CACTATCATTAGTAGGTGTTAAAGAACCTAGGTAGTCTAGCTCCAGAATCGGTGCTTGT  
AATCATACTCCCCTCCTGTATTG

>328

CCTTTTACCGATGAGGACACTTAAGCACAGAAAGGTTAAACAGTTTGTACAACCTCAC  
TATCATTAGTAGGTGTTAAAGAACCTAGGTAGTCTAGCTCCAGAATCGGTGCTTGTAA  
TACTCCCCTCCTGTATTGTCT

>329

GATGAGGACACTTAAGCACAGAAAGGTTAAACAGTTTGTACAACCTCACTATCATTAGT

AGGTGTTAAAGAACCTAGGTAGTCTAGCTCCAGAATCGGTGCTTGAATCATACTCCCC  
TCCTGTATTGTCTCTCATTGCT

>330

AAGGTAAACAGTTTGTACAACCTCACTATCATTAGTAGGTGTTAAAGAACCTAGGTAG  
TCTAGCTCCAGAATCGGTGCTTGAATCATACTCCCCTCCTGTATTGTCTCTCATTGCTAT  
TTCTTCGTCTGTCAATTTTA

>331

ATCGGTGCTTGAATCATACTCCCCTCCTGTATTGTCTCTCATTGCTATTTCTTCGTCTGT  
CAATTTTAGGCATTATCTGTTAAGCTTTTAGTATGGGATATGAGCATTTAGTCTTCTTACA  
CCATCACATTGGCTTCCT

>332

CATACTCCCCTCCTGTATTGTCTCTCATTGCTATTTCTTCGTCTGTCAATTTTAGGCATTAT  
CTGTTAAGCTTTTAGTATGGGATATGAGCATTAGTCTTCTTACACCATCACATTGGCTT  
CCTTTCCCCTTTCAGCTT

>333

CCCTCCTGTATTGTCTCTCATTGCTATTTCTTCGTCTGTCAATTTTAGGCATTATCTGTTA  
AGCTTTTAGTATGGGATATGAGCATTAGTCTTCTTACACCATCACATTGGCTTCCTTTCC  
CCTTTCAGCTTCATAGTA

>334

TCTCTCATTGCTATTTCTTCGTCTGTCAATTTAGGCATTATCTGTTAAGCTTTTAGTATG  
GGATATGAGCATTAGTCTTCTTACACCATCACATTGGCTTCCTTTCCCCTTTCAGCTTC  
ATAGTAATTTAAAAATAAA

>335

AAGCTTTTAGTATGGGATATGAGCATTAGTCTTCTTACACCATCACATTGGCTTCCTTT  
CCCCTTTCAGCTTCATAGTAATTTAAAAATAAATCAGTATTCTGTGTTTACATTATTATAA  
CTCTGAAAGATTCATTTAC

>336

AGTATGGGATATGAGCATTAGTCTTCTTACACCATCACATTGGCTTCCTTTCCCCTTTC  
AGCTTCATAGTAATTTAAAAATAAATCAGTATTCTGTGTTTACATTATTATAACTCTGAAA  
GATTCATTTACTATCAAGC

>337

TAGTCTTCTTACACCATCACATTGGCTTCCTTTCCCCTTTCAGCTTCATAGTAATTTAAA  
AATAAATCAGTATTCTGTGTTTACATTATTATAACTCTGAAAGATTCATTTACTATCAAGC  
CAAATAGTGTAGTGTGATT

>338

CCCCTTTCAGCTTCATAGTAATTTAAAAATAAATCAGTATTCTGTGTTTACATTATTATAA  
CTCTGAAAGATTCATTTACTATCAAGCCAAATAGTGTAGTGTGATTTAATCTATTTTCTTC  
TAAAGCTTTTTGTTTTTC

>339

GTAATTTAAAAATAAATCAGTATTCTGTGTTTACATTATTATAACTCTGAAAGATTCATTT  
ACTATCAAGCCAAATAGTGTAGTGTGATTTAATCTATTTTCTTCTAAAGCTTTTTGTTTTT  
CCTGGAGCTGACAATTGC

>340

ATAACTCTGAAAGATTCATTTACTATCAAGCCAAATAGTGTAGTGTGATTTAATCTATTTT  
CTTCTAAAGCTTTTTGTTTTTCTGGAGCTGACAATTGCATTATTTTTTCATTTGCTTAGT  
TTTCTGGTATTAATCACT



>341

T T A C T A T C A A G C C A A T A G T G T A G T G A T T T A A T C T A T T T T C T T C T A A A G C T T T T T G T T T  
T T C C T G G A G C T G A C A A T T G C A T T A T T T T T C A T T T G C T T A G T T T T C T G G T A T T A A T C A C T A  
A T T C T T T C C A A G C C T T T T

>342

A A T C T A T T T T C T T C T A A A G C T T T T T G T T T T C C T G G A G C T G A C A A T T G C A T T A T T T T T C A  
T T T G C T T A G T T T T C T G G T A T T A A T C A C T A A T T C T T T C C A A G C C T T T T G A G A A A C T G T A A A  
A C C C T A C A A T T C T T G C T T G

>343

C T G G A G C T G A C A A T T G C A T T A T T T T T C A T T T G C T T A G T T T T C T G G T A T T A A T C A C T A A T T  
C T T T C C A A G C C T T T T G A G A A A C T G T A A A A C C C T A C A A T T C T T G C T T G A A C C C G G G A G G  
C G G A G G C T G C A G T G A G C C G A G

>344

A C A A T T G C A T T A T T T T T C A T T T G C T T A G T T T T C T G G T A T T A A T C A C T A A T T C T T T C C A A G  
C C T T T T G A G A A A C T G T A A A A C C C T A C A A T T C T T G C T T G A A C C C G G G A G G C G G A G G C T G  
C A G T G A G C C G A G A T C G C A C C A

>345

T T A A T C A C T A A T T C T T T C C A A G C C T T T T G A G A A A C T G T A A A A C C C T A C A A T T C T T G C T T G  
A A C C C G G G A G G C G G A G G C T G C A G T G A G C C G A G A T C G C A C C A T T G C A C C C C A G C C T G G  
G C G A C A G A G C A A G A C C C C A T C T C

>346

A C T A A T T C T T T C C A A G C C T T T T G A G A A A C T G T A A A A C C C T A C A A T T C T T G C T T G A A C C C  
G G G A G G C G G A G G C T G C A G T G A G C C G A G A T C G C A C C A T T G C A C C C C A G C C T G G G C G A C  
A G A G C A A G A C C C C A T C T C A A A A A A

>347

C C C T A C A A T T C T T G C T T G A A C C C G G G A G G C G G A G G C T G C A G T G A G C C G A G A T C G C A C C  
A T T G C A C C C C A G C C T G G G C G A C A G A G C A A G A C C C C A T C T C A A A A A A C A A A C A A A C A A  
A A A A C C C C T A C A G T T C T G T T T T T C A

>348

T G C T T G A A C C C G G G A G G C G G A G G C T G C A G T G A G C C G A G A T C G C A C C A T T G C A C C C C A  
G C C T G G G C G A C A G A G C A A G A C C C C A T C T C A A A A A A C A A A C A A A A A A A C C C C T A C  
A G T T C T G T T T T T C A C A T G G T C A A A T G

>349

A A C C C G G G A G G C G G A G G C T G C A G T G A G C C G A G A T C G C A C C A T T G C A C C C C A G C C T G G  
G C G A C A G A G C A A G A C C C C A T C T C A A A A A A C A A A C A A A A A A A C C C C T A C A G T T C T  
G T T T T T C A C A T G G T C A A A T G T A T C A G

>350

A T T G C A C C C C A G C C T G G G C G A C A G A G C A A G A C C C C A T C T C A A A A A A C A A A C A A A C A A  
A A A A C C C C T A C A G T T C T G T T T T T C A C A T G G T C A A A T G T A T C A G C T G C A C T A T T T T T T T  
T T T G A G A C C T A A A A C T A G G G A T T

>351

A C C C C A T C T C A A A A A A C A A A C A A A C A A A A A A C C C C T A C A G T T C T G T T T T T C A C A T G G T  
C A A A T G T A T C A G C T G C A C T A T T T T T T T T T T T T T T T T T T T T T T T T T T T T T T T T T T T T T  
C T T T C T T T T T T A A A A A G T C A G G

>352

A C A A A A A C C C C T A C A G T T C T G T T T T T C A C A T G G T C A A A T G T A T C A G C T G C A C T A T T T T T

TTTTTTTGAGACCTAAAAGTGGGATTGCCTAAGCCTTTCCTTTTTAAAAAGTCAGGTT  
TATATAGGTATAACTTGCATA

>353

TACAGTTCTGTTTTTCACATGGTCAAATGTATCAGCTGCACTATTTTTTTTTTTGAGAC  
CTAAAAGTGGGATTGCCTAAGCCTTTCCTTTTTAAAAAGTCAGGTTTATATAGGTATAA  
CTTGCATACAGTAAAATTAA

>354

TTTCACATGGTCAAATGTATCAGCTGCACTATTTTTTTTTTTGAGACCTAAAAGTGGG  
ATTGCCTAAGCCTTTCCTTTTTAAAAAGTCAGGTTTATATAGGTATAACTTGCATACAGT  
AAAATTAACCTTTTTTAGGT

>355

ATCAGCTGCACTATTTTTTTTTTTGAGACCTAAAAGTGGGATTGCCTAAGCCTTTCCT  
TTTTAAAAAGTCAGGTTTATATAGGTATAACTTGCATACAGTAAAATTAACCTTTTTTAG  
GTGTAAGAGTTCTGAGAGGT

>356

TAAAAGTGGGATTGCCTAAGCCTTTCCTTTTTAAAAAGTCAGGTTTATATAGGTATAAC  
TTGCATACAGTAAAATTAACCTTTTTTAGGTGTAAGAGTTCTGAGAGGTTTGATAGAATA  
TATCAAGGTATAGGGCCAGC

>357

AGCCTTTCCTTTTTAAAAAGTCAGGTTTATATAGGTATAACTTGCATACAGTAAAATTAA  
CCTTTTTTAGGTGTAAGAGTTCTGAGAGGTTTGATAGAATATATCAAGGTATAGGGCCA  
GCGCCGATGGCTCACACCTGT

>358

AAAGTCAGGTTTATATAGGTATAACTTGCATACAGTAAAATTAACCTTTTTTAGGTGTAA  
GAGTTCTGAGAGGTTTGATAGAATATATCAAGGTATAGGGCCAGCGCCGATGGCTCACA  
CCTGTAGTCCCAACAATTTGG

>359

AACTTGCATACAGTAAAATTAACCTTTTTTAGGTGTAAGAGTTCTGAGAGGTTTGATAG  
AATATATCAAGGTATAGGGCCAGCGCCGATGGCTCACACCTGTAGTCCCAACAATTTGG  
GAGGCCAAGGCGGGAGGATCAC

>360

CATACAGTAAAATTAACCTTTTTTAGGTGTAAGAGTTCTGAGAGGTTTGATAGAATATAT  
CAAGGTATAGGGCCAGCGCCGATGGCTCACACCTGTAGTCCCAACAATTTGGGAGGCC  
AAGGCGGGAGGATCACTTAGGC

>361

GTAAGAGTTCTGAGAGGTTTGATAGAATATATCAAGGTATAGGGCCAGCGCCGATGGCT  
CACACCTGTAGTCCCAACAATTTGGGAGGCCAAGGCGGGAGGATCACTTAGGCCAG  
GAGTTTGAGACCAGCTTGGGCAAC

>362

AGAATATATCAAGGTATAGGGCCAGCGCCGATGGCTCACACCTGTAGTCCCAACAATTT  
GGGAGGCCAAGGCGGGAGGATCACTTAGGCCAGGAGTTTGAGACCAGCTTGGGCAA  
CATAGTGAGACCCTGTCTCTACAA

>363

ATCAAGGTATAGGGCCAGCGCCGATGGCTCACACCTGTAGTCCCAACAATTTGGGAGG  
CCAAGGCGGGAGGATCACTTAGGCCAGGAGTTTGAGACCAGCTTGGGCAACATAGT  
GAGACCCTGTCTCTACAAAAAAA

>364

AGGGCCAGCGCCGATGGCTCACACCTGTAGTCCCAACAATTTGGGAGGCCAAGGCGG  
GAGGATCACTTAGGCCAGGAGTTTGAGACCAGCTTGGGCAACATAGTGAGACCCTGT  
CTCTACAAAAAAAAAAAAAAAAAAG

>365

GGCTCACACCTGTAGTCCCAACAATTTGGGAGGCCAAGGCGGGAGGATCACTTAGGCC  
CAGGAGTTTGAGACCAGCTTGGGCAACATAGTGAGACCCTGTCTCTACAAAAAAAA  
AAAAAAAAAAGGTATCAAGGTACAGG

>366

GCCCAGGAGTTTGAGACCAGCTTGGGCAACATAGTGAGACCCTGTCTCTACAAAA  
AAAAAAAAAAGGTATCAAGGTACAGGAAATTTCCACTACCCAACAAAGGTCACTC  
ACCCTTTGTAGTTAATAACTTCTCT

>367

GTTTGAGACCAGCTTGGGCAACATAGTGAGACCCTGTCTCTACAAAAAAAAAAAA  
AAAAGGTATCAAGGTACAGGAAATTTCCACTACCCAACAAAGGTCACTCACCTTTG  
TAGTTAATAACTTCTCTGCAACCTA

>368

GACCCTGTCTCTACAAAAAAAAAAAAAAAAAAGGTATCAAGGTACAGGAAATTTCCA  
CTACCCAACAAAGGTCACTCACCTTTGTAGTTAATAACTTCTCTGCAACCTAGATCC  
AGCCAACTACTGATAAGATGTCTG

>369

AAAAAAAAAAGGTATCAAGGTACAGGAAATTTCCACTACCCAACAAAGGTCACT  
CACCTTTGTAGTTAATAACTTCTCTGCAACCTAGATCCAGCCAACTACTGATAAGATG  
TCTGTCCTTGATTTTCCAGAAT

>370

TACAGGAAATTTCCACTACCCAACAAAGGTCACTCACCTTTGTAGTTAATAACTTCT  
CTGCAACCTAGATCCAGCCAACTACTGATAAGATGTCTGTCCTTGATTTTCCAGAATG  
ACTTAAATGGAGTCATACAGT

>371

AACAAAGGTCACTCACCTTTGTAGTTAATAACTTCTCTGCAACCTAGATCCAGCCAA  
CTACTGATAAGATGTCTGTCCTTGATTTTCCAGAATGACTTAAATGGAGTCATACAGT  
AAGTAGGCTTTGTGTCTGGC

>372

TAGTTAATAACTTCTCTGCAACCTAGATCCAGCCAACTACTGATAAGATGTCTGTCCTG  
TATTTTCCAGAATGACTTAAATGGAGTCATACAGTAAGTAGGCTTTGTGTCTGGCTTC  
AAGCCTTTACTTTTATAAA

>373

GCAACCTAGATCCAGCCAACTACTGATAAGATGTCTGTCCTTGATTTTCCAGAATGTAC  
TTAAATGGAGTCATACAGTAAGTAGGCTTTGTGTCTGGCTTCAAGCCTTTACTTTTAT  
AAAGAATAACAATGGTAATA

>374

CAGCCAACTACTGATAAGATGTCTGTCCTTGATTTTCCAGAATGACTTAAATGGAGTC  
ATACAGTAAGTAGGCTTTGTGTCTGGCTTCAAGCCTTTACTTTTATAAAGAATAACAA  
TGGTAATAATTATAGCTGAC

>375

CCAACTACTGATAAGATGTCTGTCCTTGATTTTCCAGAATGACTTAAATGGAGTCATA

CAGTAAGTAGGCTTTTGTGTCTGGCTTCAAGCCTTTACTTTTTATAAAGAATAACAATG  
GTAATAATTATAGCTGACATT

>376

GTCCTTGTATTTCCAGAATGTACTTAAATGGAGTCATACAGTAAGTAGGCTTTTGTGTC  
TGGCTTCAAGCCTTTACTTTTTATAAAGAATAACAATGGTAATAATTATAGCTGACATTTA  
TTAAAGGCTGAGCGGATAC

>377

ATGTACTTAAATGGAGTCATACAGTAAGTAGGCTTTTGTGTCTGGCTTCAAGCCTTTACT  
TTTTATAAAGAATAACAATGGTAATAATTATAGCTGACATTTATTAAAGGCTGAGCGGAT  
ACTGTATACTGTGCTACAGG

>378

GTAAGTAGGCTTTTGTGTCTGGCTTCAAGCCTTTACTTTTTATAAAGAATAACAATGGTA  
ATAATTATAGCTGACATTTATTAAAGGCTGAGCGGATACTGTATACTGTGCTACAGGCTT  
TTCGTGGTTATCTCATCAC

>379

GTCTGGCTTCAAGCCTTTACTTTTTATAAAGAATAACAATGGTAATAATTATAGCTGACA  
TTTATTAAAGGCTGAGCGGATACTGTATACTGTGCTACAGGCTTTTCGTGGTTATCTCA  
TCACTGTTTCACATATGTAG

>380

GAATAACAATGGTAATAATTATAGCTGACATTTATTAAAGGCTGAGCGGATACTGTATAC  
TGTGCTACAGGCTTTTCGTGGTTATCTCATCACTGTTTCACATATGTAGGTATACAGTT  
CTTTCTTTAAAATATGTGAC

>381

GCTGAGCGGATACTGTATACTGTGCTACAGGCTTTTCGTGGTTATCTCATCACTGTTTC  
ACATATGTAGGTATACAGTTCTTTCTTTAAAATATGTGACTGAAAAATATTATTGAACATT  
ATGCTAAAATTTGTTACAC

>382

GATACTGTATACTGTGCTACAGGCTTTTCGTGGTTATCTCATCACTGTTTCACATATGTA  
GGTATACAGTTCTTTCTTTAAAATATGTGACTGAAAAATATTATTGAACATTATGCTAAAA  
TTTGTTACTGAGAAGA

>383

ACAGTTCTTTCTTTAAAATATGTGACTGAAAAATATTATTGAACATTATGCTAAAATTTG  
TTACTGAGAAGACTTAAGAAAAACAGAGCTCATGTTTCTTTCAACTGATTTCTTTT  
TTACATTGTACTTGAGTACCT

>384

GTTCTTTCTTTAAAATATGTGACTGAAAAATATTATTGAACATTATGCTAAAATTTGTTAC  
ACTGAGAAGACTTAAGAAAAACAGAGCTCATGTTTCTTTCAACTGATTTCTTTTAC  
ATTGTACTTGAGTACCTGGA

>385

TATGTGACTGAAAAATATTATTGAACATTATGCTAAAATTTGTTACTGAGAAGACTTA  
AGAAAAACAGAGCTCATGTTTCTTTCAACTGATTTCTTTTACATTGTACTTGAGTAC  
CTGGAAGCTGCTTGCTTCTT

>386

TGTGACTGAAAAATATTATTGAACATTATGCTAAAATTTGTTACTGAGAAGACTTAA  
GAAAAACAGAGCTCATGTTTCTTTCAACTGATTTCTTTTACATTGTACTTGAGTACC  
TGGAAGCTGCTTGCTTCTTTC

>387

CTGAGAAGACTTAAGAAAAACAGAGCTCATGTTTTCTTTCAACTGATTCCTTTTTTACA  
TTGACTTGAGTACCTGGAAGCTGCTTGCTTCTTTCCGCAGCTTAGGATACAAACTCCC  
TGACAGTTAAGTGCTTCTTTAC

>388

TTAAGAAAAACAGAGCTCATGTTTTCTTTCAACTGATTCCTTTTTACATTGACTTGAG  
TACCTGGAAGCTGCTTGCTTCTTTCCGCAGCTTAGGATACAAACTCCCTGACAGTTAAG  
TGCTTCTTTACTTCCCATCCA

>389

GTTTTCTTTCAACTGATTCCTTTTTACATTGACTTGAGTACCTGGAAGCTGCTTGCTT  
CTTTCCGCAGCTTAGGATACAAACTCCCTGACAGTTAAGTGCTTCTTTACTTCCCATCC  
AGTGCCTTGACAGGGCTTGG

>390

CTTTCAACTGATTCCTTTTTACATTGACTTGAGTACCTGGAAGCTGCTTGCTTCTTTC  
CGCAGCTTAGGATACAAACTCCCTGACAGTTAAGTGCTTCTTTACTTCCCATCCAGTGC  
CTTGACAGGGCTTGGTACAT

>391

TGCTTGCTTCTTTCCGCAGCTTAGGATACAAACTCCCTGACAGTTAAGTGCTTCTTTAC  
TTCCCATCCAGTGCCTTGACAGGGCTTGGTACATGGTTTGGTCCAAAATATTTGTTGA  
ATAAATTTGCAGATAGCCCACG

>392

TCCGCAGCTTAGGATACAAACTCCCTGACAGTTAAGTGCTTCTTTACTTCCCATCCAGT  
GCCTTGACAGGGCTTGGTACATGGTTTGGTCCAAAATATTTGTTGAATAAATTTGCAG  
ATAGCCCACGTGTGTAGGAGAG

>393

TCCCATCCAGTGCCTTGACAGGGCTTGGTACATGGTTTGGTCCAAAATATTTGTTGAA  
TAAATTTGCAGATAGCCCACGTGTGTAGGAGAGGGAGAGAAGGTTCTTGAAAAATGGA  
GATTGGAGGAATCTAGGATGGGG

>394

ATCCAGTGCCTTGACAGGGCTTGGTACATGGTTTGGTCCAAAATATTTGTTGAATAAA  
TTTGCAGATAGCCCACGTGTGTAGGAGAGGGAGAGAAGGTTCTTGAAAAATGGAGATT  
GGAGGAATCTAGGATGGGGAGGG

>395

AGGGCTTGGTACATGGTTTGGTCCAAAATATTTGTTGAATAAATTTGCAGATAGCCCAC  
GTGTGTAGGAGAGGGAGAGAAGGTTCTTGAAAAATGGAGATTGGAGGAATCTAGGAT  
GGGGAGGGAGATATGGGAAGGGCC

>396

TATTTGTTGAATAAATTTGCAGATAGCCCACGTGTGTAGGAGAGGGAGAGAAGGTTCTT  
GAAAAATGGAGATTGGAGGAATCTAGGATGGGGAGGGAGATATGGGAAGGGCCCAGA  
CAGAGGCAGGAGGGTTCCAACCTG

>397

TGAATAAATTTGCAGATAGCCCACGTGTGTAGGAGAGGGAGAGAAGGTTCTTGAAAAA  
TGAGATTGGAGGAATCTAGGATGGGGAGGGAGATATGGGAAGGGCCCAGACAGAGG  
CAGGAGGGTTCCAACCTGTTTCTCT

>398

TTTGCAGATAGCCCACGTGTGTAGGAGAGGGAGAGAAGGTTCTTGAAAAATGGAGATT

GGAGGAATCTAGGATGGGGAGGGAGATATGGGAAGGGCCCAGACAGAGGCAGGAGG  
GTTCCAACCTGTTCTCTCCCTGCA

>399

CACGTGTGTAGGAGAGGGAGAGAAGGTTCTTGAAAAATGGAGATTGGAGGAATCTAG  
GATGGGGAGGGAGATATGGGAAGGGCCCAGACAGAGGCAGGAGGGTTCCAACCTGTT  
CCTCTTCCCTGCAGCCCAGTGTTC

>400

TCTTGAAAAATGGAGATTGGAGGAATCTAGGATGGGGAGGGAGATATGGGAAGGGCC  
CAGACAGAGGCAGGAGGGTTCCAACCTGTTCTCTTCCCTGCAGCCCAGTGTTC

>401

GAGGGAGATATGGGAAGGGCCCAGACAGAGGCAGGAGGGTTCCAACCTGTTCTCTT  
CCCTGCAGCCCAGTGTTC

>402

TTCCAACCTGTTCTCTTCCCTGCAGCCCAGTGTTC

>403

CTTCCCTGCAGCCCAGTGTTC

>404

CGGGCTCTTTGAGTTCTGCTCGCGTTACACAGGCGCATCTCTGCAAGGAGCAACCCAG  
CTGAACAACAAGGTGACATAGTCCCAGTCTGTTCTTCTTCTGATCCCTGGA

>405

TGCTCGCGTTACACAGGCGCATCTCTGCAAGGAGCAACCCAGCTGAACAACAAGGTG  
ACATAGTCCCAGTCTGTTCTTCTTCTGATCCCTGGACTCGGGATTTAACCT  
GATCCTGGGCTCCAGCTTGAGG

>406

TCCCGAGTCTGTTCTTCTTCTGATCCCTGGACTCGGGATTTAACCTGATCCT  
GGGCTCCAGCTTGAGGGGTGGGCAGGAAGGACTGTGACTTAGGTGTTGTCTTTCAG  
ATCTGTGATATTGCCATTA

>407

GTCCTGTTCTTCTTCTGATCCCTGGACTCGGGATTTAACCTGATCCTGGGCTC  
CCAGCTTGAGGGGTGGGCAGGAAGGACTGTGACTTAGGTGTTGTCTTTCAGATCTGT  
GATATTGCCATTA

>408

TCCTTCTGATCCCTGGACTCGGGATTTAACCTGATCCTGGGCTCCAGCTTGA  
GGGGTGGGCAGGAAGGACTGTGACTTAGGTGTTGTCTTTCAGATCTGTGATATTGCCA  
TTAACTGGGCTGGTGGTCTGCA

>409

AACCTGATCCTGGGCTCCAGCTTGAGGGGTGGGCAGGAAGGACTGTGACTTAGGT  
GTTGTCTTTCAGATCTGTGATATTGCCATTA

>410

GACTTAGGTGTTTGTCTTTCAGATCTGTGATATTGCCATTAAGTGGGCTGGTGGTCTGCA  
CCATGCCAAGAAGTTTGAGGTGAGTGAGGAGGTGATGGGAAAGACAGTGGCCATCCT  
AGGGTAGGTGTTTAGGATGATGG

>411

TTAGGTGTTTGTCTTTCAGATCTGTGATATTGCCATTAAGTGGGCTGGTGGTCTGCACCA  
TGCCAAGAAGTTTGAGGTGAGTGAGGAGGTGATGGGAAAGACAGTGGCCATCCTAGG  
GTAGGTGTTTAGGATGATGGTGG

>412

TCAGATCTGTGATATTGCCATTAAGTGGGCTGGTGGTCTGCACCATGCCAAGAAGTTTG  
AGGTGAGTGAGGAGGTGATGGGAAAGACAGTGGCCATCCTAGGGTAGGTGTTTAGGA  
TGATGGTGGGGGGCAGCTGGGAGG

>413

GATCTGTGATATTGCCATTAAGTGGGCTGGTGGTCTGCACCATGCCAAGAAGTTTGAGG  
TGAGTGAGGAGGTGATGGGAAAGACAGTGGCCATCCTAGGGTAGGTGTTTAGGATGAT  
GGTGGGGGGCAGCTGGGAGGGGA

>414

TGCCATTAAGTGGGCTGGTGGTCTGCACCATGCCAAGAAGTTTGAGGTGAGTGAGGAG  
GTGATGGGAAAGACAGTGGCCATCCTAGGGTAGGTGTTTAGGATGATGGTGGGGGGCA  
GCTGGGAGGGGAATTGCTCTTCTC

>415

GGTGGTCTGCACCATGCCAAGAAGTTTGAGGTGAGTGAGGAGGTGATGGGAAAGACA  
GTGGCCATCCTAGGGTAGGTGTTTAGGATGATGGTGGGGGGCAGCTGGGAGGGGAATT  
GCTCTTCTTTATGAGACCACTGT

>416

TGAGTGAGGAGGTGATGGGAAAGACAGTGGCCATCCTAGGGTAGGTGTTTAGGATGAT  
GGTGGGGGGCAGCTGGGAGGGGAATTGCTCTTCTTTATGAGACCACTGTCTTGCCA  
TAGGCCTCTGGCTTCTGCTATGTC

>417

GGAGGTGATGGGAAAGACAGTGGCCATCCTAGGGTAGGTGTTTAGGATGATGGTGGGG  
GGCAGCTGGGAGGGGAATTGCTCTTCTTTATGAGACCACTGTCTTGCCATAGGCCTC  
TGGCTTCTGCTATGTCAACGACA

>418

CATCCTAGGGTAGGTGTTTAGGATGATGGTGGGGGGCAGCTGGGAGGGGAATTGCTCT  
TCTCTTTATGAGACCACTGTCTTGCCATAGGCCTCTGGCTTCTGCTATGTCAACGACATT  
GTGATTGGCATCCTGGAGCTGC

>419

TAGGATGATGGTGGGGGGCAGCTGGGAGGGGAATTGCTCTTCTTTATGAGACCACT  
GTCTTGCCATAGGCCTCTGGCTTCTGCTATGTCAACGACATTGTGATTGGCATCCTGGA  
GCTGCTCAAGTAAGTAGCCCAGG

>420

TGAGACCACTGTCTTGCCATAGGCCTCTGGCTTCTGCTATGTCAACGACATTGTGATTG  
GCATCCTGGAGCTGCTCAAGTAAGTAGCCCAGGAGGAGATGGGGGCAGTTACGGGATT  
CTTGGCTGAGGAGGTCTCTCAGT

>421

TGCTTGCCATAGGCCTCTGGCTTCTGCTATGTCAACGACATTGTGATTGGCATCCTGG

AGCTGCTCAAGTAAGTAGCCCAGGAGGAGATGGGGGCAGTTACGGGATTCTTGGCTGA  
GGAGGTCTCTCAGTCTCAACCCT

>422

GGCCTCTGGCTTCTGCTATGTCAACGACATTGTGATTGGCATCCTGGAGCTGCTCAAGT  
AAGTAGCCCAGGAGGAGATGGGGGCAGTTACGGGATTCTTGGCTGAGGAGGTCTCTC  
AGTCTCAACCCTGACCTTGACCTC

>423

CTCTGGCTTCTGCTATGTCAACGACATTGTGATTGGCATCCTGGAGCTGCTCAAGTAAG  
TAGCCCAGGAGGAGATGGGGGCAGTTACGGGATTCTTGGCTGAGGAGGTCTCTCAGTC  
TCAACCCTGACCTTGACCTCCCT

>424

TGGCTTCTGCTATGTCAACGACATTGTGATTGGCATCCTGGAGCTGCTCAAGTAAGTAG  
CCCAGGAGGAGATGGGGGCAGTTACGGGATTCTTGGCTGAGGAGGTCTCTCAGTCTCA  
ACCCTGACCTTGACCTCCCTCCT

>425

TATGTCAACGACATTGTGATTGGCATCCTGGAGCTGCTCAAGTAAGTAGCCCAGGAGG  
AGATGGGGGCAGTTACGGGATTCTTGGCTGAGGAGGTCTCTCAGTCTCAACCCTGACC  
TTGACCTCCCTCCTCCCTGATTAG

>426

TGGCATCCTGGAGCTGCTCAAGTAAGTAGCCCAGGAGGAGATGGGGGCAGTTACGGG  
ATTCTTGGCTGAGGAGGTCTCTCAGTCTCAACCCTGACCTTGACCTCCCTCCTCCCTGA  
TTAGCTTCTCCAAGTTCTTGATG

>427

TTACGGGATTCTTGGCTGAGGAGGTCTCTCAGTCTCAACCCTGACCTTGACCTCCCTCC  
TCCCTGATTAGCTTCTCCAAGTTCTTGATGCTTTATTCAGGCTGCCTTCTCCACTGCTG  
CAGATTCCCTACTGCCTGCTC

>428

TTGGCTGAGGAGGTCTCTCAGTCTCAACCCTGACCTTGACCTCCCTCCTCCCTGATTAG  
CTTCTCCAAGTTCTTGATGCTTTATTCAGGCTGCCTTCTCCACTGCTGCAGATTCCCTA  
CTGCCTGCTCACATTCAGCC

>429

TCCCTCCTCCCTGATTAGCTTCTCCAAGTTCTTGATGCTTTATTCAGGCTGCCTCTTCC  
ACTGCTGCAGATTCCCTACTGCCTGCTCACATTCAGCCTTCTCTGCATATCCCTCTCCT  
GTCCTGCCTCTAGCCTTA

>430

AGTTCTTGATGCTTTATTCAGGCTGCCTTCTCCACTGCTGCAGATTCCCTACTGCCTGCT  
CACATTCAGCCTTCTCTGCATATCCCTCTCCTGTCCTGCTCTAGCCTCTAGGCTGGA  
GCCCCAGTTGCCTTTAGGG

>431

CTGCAGATTCCCTACTGCCTGCTCACATTCAGCCTTCTCTGCATATCCCTCTCCTGTCC  
CTGCCTCTAGCCTCTAGGCTGGAGCCCCAGTTGCCTTTAGGGAACTGGTGACATTAA  
GTTTCAGGTGACCAGGGCAGAA

>432

TTCCCTACTGCCTGCTCACATTCAGCCTTCTCTGCATATCCCTCTCCTGTCCCTGCCTCT  
AGCCTCTAGGCTGGAGCCCCAGTTGCCTTTAGGGAACTGGTGACATTAAGTTTCAGG  
TGACCAGGGCAGAAGCAGACT



>433

CTCTCCTGTCCCTGCCTCTAGCCTCTAGGCTGGAGCCCCCAGTTGCCTTTAGGGAAGT  
GTGACATTAAGTTTCAGGTGACCAGGGCAGAAGCAGACTCTTCACAATTCGAGACCCG  
GTGTTTGAGAGGAGTGGGTTGGG

>434

TGTCCTGCCTCTAGCCTCTAGGCTGGAGCCCCCAGTTGCCTTTAGGGAAGTGGTGACA  
TTAAGTTTCAGGTGACCAGGGCAGAAGCAGACTCTTCACAATTCGAGACCCGGTGT  
GAGAGGAGTGGGTTGGGGGTTT

>435

CTCTAGGCTGGAGCCCCCAGTTGCCTTTAGGGAAGTGGTGACATTAAGTTTCAGGTGA  
CCAGGGCAGAAGCAGACTCTTCACAATTCGAGACCCGGTGTGGAGAGGAGTGGGTT  
GGGGGGTTCACTTCTAGCTCAGACC

>436

CTGGTGACATTAAGTTTCAGGTGACCAGGGCAGAAGCAGACTCTTCACAATTCGAGAC  
CCGGTGTGGAGAGGAGTGGGTTGGGGGGTTCACTTCTAGCTCAGACCCTGGCTTTGG  
CTTCCCTCTAGGTACCACCCTCGG

>437

GGTGACATTAAGTTTCAGGTGACCAGGGCAGAAGCAGACTCTTCACAATTCGAGACCC  
GGTGTGGAGAGGAGTGGGTTGGGGGGTTCACTTCTAGCTCAGACCCTGGCTTTGGCT  
TCCCTCTAGGTACCACCCTCGGGT

>438

GGCAGAAGCAGACTCTTCACAATTCGAGACCCGGTGTGGAGAGGAGTGGGTTGGGG  
GGTTCACTTCTAGCTCAGACCCTGGCTTTGGCTTCCCTCTAGGTACCACCCTCGGGTGC  
TCTACATTGACATTGACATCCACC

>439

CTTCCCTCTAGGTACCACCCTCGGGTGCTCTACATTGACATTGACATCCACCATGGTGA  
CGGGGTTCAAGAAGCTTTCTACCTCACTGACCGGGTCATGACGGTGTCTTCCACAAA  
TACGAAATTACTTCTTCCCTGG

>440

CCCTCTAGGTACCACCCTCGGGTGCTCTACATTGACATTGACATCCACCATGGTGACGG  
GGTCAAGAAGCTTTCTACCTCACTGACCGGGTCATGACGGTGTCTTCCACAAATAC  
GGAAATTACTTCTTCCCTGGCAC

>441

TTCTACCTCACTGACCGGGTCATGACGGTGTCTTCCACAAATACGAAATTACTTCTT  
CCCTGGCACAGGTATGGGAATAGGGATTACTTTCCCTTTGCACCCTCAGCTCTTACT  
ATGAGTGCCTCCTTCTCAGCC

>442

GACCGGGTCATGACGGTGTCTTCCACAAATACGAAATTACTTCTTCCCTGGCACAG  
GTATGGGAATAGGGATTACTTTCCCTTTGCACCCTCAGCTCTTACTATGAGTGCCTC  
CTTCTCAGCCTTCTAGTCTCAT

>443

TTCTTCCCTGGCACAGGTATGGGAATAGGGATTACTTTCCCTTTGCACCCTCAGCTCT  
TACTATGAGTGCCTCCTTCTCAGCCTTCTAGTCTCATCTCAGGTGTCCCCTCCTCAGAG  
AAGCCTTTCCTTACCACTCC

>444

AGGTATGGGAATAGGGATTACTTTCCCTTTGCACCCTCAGCTCTTACTATGAGTGCC

TCCTTCTCAGCCTTCTAGTCTCATCTCAGGTGTCCCCTCCTCAGAGAAGCCTTTCCTTA  
CCTACTCCAGTTATCATAATCA

>445

ACTTTCCCCTTTGCACCCTTCAGCTCTTTACTATGAGTGCCTCCTTCTCAGCCTTCTAGT  
CTCATCTCAGGTGTCCCCTCCTCAGAGAAGCCTTTCCTTACCACTCCAGTTATCATAATC  
ACCTCCTTCCCATTCTCT

>446

CCCTTCAGCTCTTTACTATGAGTGCCTCCTTCTCAGCCTTCTAGTCTCATCTCAGGTGTC  
CCCTCCTCAGAGAAGCCTTTCCTTACCACTCCAGTTATCATAATCACCTCCTTCCCATT  
CCTCTGTTACATCAGCCTCA

>447

CTTCAGCTCTTTACTATGAGTGCCTCCTTCTCAGCCTTCTAGTCTCATCTCAGGTGTCCC  
CTCCTCAGAGAAGCCTTTCCTTACCACTCCAGTTATCATAATCACCTCCTTCCCATTCC  
TCTGTTACATCAGCCTCATT

>448

CAGCTCTTTACTATGAGTGCCTCCTTCTCAGCCTTCTAGTCTCATCTCAGGTGTCCCCTC  
CTCAGAGAAGCCTTTCCTTACCACTCCAGTTATCATAATCACCTCCTTCCCATTCTCT  
GTTACATCAGCCTCATTGTT

>449

CCTCCTTCTCAGCCTTCTAGTCTCATCTCAGGTGTCCCCTCCTCAGAGAAGCCTTTCCTT  
ACCACTCCAGTTATCATAATCACCTCCTTCCCATTCTCTGTTACATCAGCCTCATTGTT  
TCCCTCAGAACTCACTG

>450

CTCAGAGAAGCCTTTCCTTACCACTCCAGTTATCATAATCACCTCCTTCCCATTCTCT  
GTTACATCAGCCTCATTGTTTCCCTCAGAACTCACTGCTATTTGTGTTTATTGTGGTT  
TTTTGTTTTGTTTTGTTTAC

>451

TACCACTCCAGTTATCATAATCACCTCCTTCCCATTCTCTGTTACATCAGCCTCATTGT  
TCCCTCAGAACTCACTGCTATTTGTGTTTATTGTGGTTTTTTGTTTTGTTTTGTTTAC  
TGCCTCCCTCCTCCTCAT

>452

TTTGTGTTTATTGTGGTTTTTTGTTTTGTTTTGTTTACTGCCTCCCTCCTCATGGCTA  
TTCCCTAAGAATATAAGCGTGGTGGGATATCGTAAATTCATTAGTTCCATTCGTTGCTG  
CATCCCTACTGCCTAGTAC

>453

TATTGTGGTTTTTTGTTTTGTTTTGTTTACTGCCTCCCTCCTCCTCATGGCTATTCCCTAA  
GAATATAAGCGTGGTGGGATATCGTAAATTCATTAGTTCCATTCGTTGCTGCATCCCTA  
CTGCCTAGTACACAGTTGG

>454

ACTGCCTCCCTCCTCCTCATGGCTATTCCCTAAGAATATAAGCGTGGTGGGATATCGTAA  
ATTTTATTAGTTCCATTCGTTGCTGCATCCCTACTGCCTAGTACACAGTTGGCTCAGAGT  
GGATCCCCAAAATTTG

>455

AAGAATATAAGCGTGGTGGGATATCGTAAATTCATTAGTTCCATTCGTTGCTGCATCCC  
TACTGCCTAGTACACAGTTGGCTCAGAGTGGATCCCCAAAATTTGCCAATGAAT  
GCAAGCTGCAAGAGATTTAGT

>456

TAAGCGTGGTGGGATATCGTAAATTCATTAGTTCATTGTTGCTGCATCCCTACTGCC  
TAGTACACAGTTGGCTCAGAGTGGATCCCCAAAACATTTGCCCAATGAATGCAAGCT  
GCAAGAGATTTAGTGGCTCTA

>457

TGGGATATCGTAAATTCATTAGTTCATTGTTGCTGCATCCCTACTGCCTAGTACACA  
GTTGGCTCAGAGTGGATCCCCAAAACATTTGCCCAATGAATGCAAGCTGCAAGAGA  
TTTAGTGGCTCTAGGGAGTTTA

>458

CATCCCTACTGCCTAGTACACAGTTGGCTCAGAGTGGATCCCCAAAACATTTGCCCA  
ATGAATGCAAGCTGCAAGAGATTTAGTGGCTCTAGGGAGTTTATGGTGAAGCTACATAG  
ATGGAATGAGAGGCTCCCAGAG

>459

GTACACAGTTGGCTCAGAGTGGATCCCCAAAACATTTGCCCAATGAATGCAAGCTG  
CAAGAGATTTAGTGGCTCTAGGGAGTTTATGGTGAAGCTACATAGATGGAATGAGAGG  
CTCCCAGAGTGCAGATTGGGGCTG

>460

TGGCTCAGAGTGGATCCCCAAAACATTTGCCCAATGAATGCAAGCTGCAAGAGATT  
TAGTGGCTCTAGGGAGTTTATGGTGAAGCTACATAGATGGAATGAGAGGCTCCCAGAG  
TGCAGATTGGGGCTGAAACAGCTG

>461

CCCCAAAACATTTGCCCAATGAATGCAAGCTGCAAGAGATTTAGTGGCTCTAGGGAG  
TTTATGGTGAAGCTACATAGATGGAATGAGAGGCTCCCAGAGTGCAGATTGGGGCTGA  
AACAGCTGGGTTGTGGGTGCTTCC

>462

TGAATGCAAGCTGCAAGAGATTTAGTGGCTCTAGGGAGTTTATGGTGAAGCTACATAGA  
TGGAATGAGAGGCTCCCAGAGTGCAGATTGGGGCTGAAACAGCTGGGTTGTGGGTGC  
TTCCCATGTGTGGCTACCACCACC

>463

AGAGATTTAGTGGCTCTAGGGAGTTTATGGTGAAGCTACATAGATGGAATGAGAGGCTC  
CCAGAGTGCAGATTGGGGCTGAAACAGCTGGGTTGTGGGTGCTCCCATGTGTGGCTA  
CCACCACCCACTTCCCTACAGGT

>464

TAGGGAGTTTATGGTGAAGCTACATAGATGGAATGAGAGGCTCCCAGAGTGCAGATTG  
GGGCTGAAACAGCTGGGTTGTGGGTGCTCCCATGTGTGGCTACCACCACCCACTTCC  
CTACAGGTGACATGTATGAAGTCG

>465

CAGCTGGGTTGTGGGTGCTCCCATGTGTGGCTACCACCACCCACTTCCCTACAGGTG  
ACATGTATGAAGTCGGGGCAGAGAGTGGCCGCTACTACTGTCTGAACGTGCCCTGCGGGATGG  
GGATGGCATTGATGACCAGAGTAA

>466

TGAAGTCGGGGCAGAGAGTGGCCGCTACTACTGTCTGAACGTGCCCTGCGGGATGG  
CATTGATGACCAGAGTAAGTACCGAAGTCTCCCTCTGTTCCCTAGGCCCTTCTTTTT  
CTCCTTGAATAACCTCTTCTGCC

>467

AAGTCGGGGCAGAGAGTGGCCGCTACTACTGTCTGAACGTGCCCTGCGGGATGGCAT

TGATGACCAGAGTAAGTACCGAAGTCTTCCCTCTGTTCCCTAGGCCCTTCTTTTTCTC  
CTTGAAATAACCTCTTCTGCCTG

>468

TCTGAACGTGCCCCTGCGGGATGGCATTGATGACCAGAGTAAGTACCGAAGTCTTCCC  
TCTGTTCCCTAGGCCCTTCTTTTTCTCCTTGAAATAACCTCTTCTGCCTGGTATTGTCT  
GCTGTTGGGCCAGTTGTCCTTA

>469

GTTCCCTAGGCCCTTCTTTTTCTCCTTGAAATAACCTCTTCTGCCTGGTATTGTCTGCT  
GTTGGGCCAGTTGTCCTTAAGGATGAATGGCCTTCAGAGGGACCATGAATCTCTGGAA  
ATTGTATGCAACATATCATGTG

>470

CCCTTCTTTTTCTCCTTGAAATAACCTCTTCTGCCTGGTATTGTCTGCTGTTGGGCCAGT  
TGTCCCTAAGGATGAATGGCCTTCAGAGGGACCATGAATCTCTGGAAATTGTATGCAAC  
ATATCATGTGTATGTGCATTT

>471

TGAAATAACCTCTTCTGCCTGGTATTGTCTGCTGTTGGGCCAGTTGTCCTAAGGATGA  
ATGGCCTTCAGAGGGACCATGAATCTCTGGAAATTGTATGCAACATATCATGTGTATGTG  
CATTTTTCTGGGAAAAGTCAT

>472

TCAGAGGGACCATGAATCTCTGGAAATTGTATGCAACATATCATGTGTATGTGCATTTTT  
CTGGGAAAAGTCATTGGCTTTCATCAGTCACTCATAGCAGTCTGGGATCCCTTCCAGAA  
GTTTCAGACCAGTGATTTGAT

>473

CTCTGGAAATTGTATGCAACATATCATGTGTATGTGCATTTTTCTGGGAAAAGTCATTGG  
CTTTCATCAGTCACTCATAGCAGTCTGGGATCCCTTCCAGAAGTTTCAGACCAGTGATT  
TGATTCTTTTGGGTGGCCCT

>474

TGTATGCAACATATCATGTGTATGTGCATTTTTCTGGGAAAAGTCATTGGCTTTCATCAG  
TCACTCATAGCAGTCTGGGATCCCTTCCAGAAGTTTCAGACCAGTGATTTGATTCTTTT  
GGGTGGCCCTTTCCTGGGCT

>475

ATGCAACATATCATGTGTATGTGCATTTTTCTGGGAAAAGTCATTGGCTTTCATCAGTCA  
CTCATAGCAGTCTGGGATCCCTTCCAGAAGTTTCAGACCAGTGATTTGATTCTTTTGGG  
TGGCCCTTTCCTGGGCTACA

>476

TATGTGCATTTTTCTGGGAAAAGTCATTGGCTTTCATCAGTCACTCATAGCAGTCTGGG  
ATCCCTTCCAGAAGTTTCAGACCAGTGATTTGATTCTTTTGGGTGGCCCTTTCCTGGG  
CTACATGCTCGCTCAACCCCT

>477

CTGGGCTACATGCTCGCTCAACCCCTTTTTCTTTTGTCCCTGTCTCCCATCCCCTT  
GGGGTGCCAGGTGCCATCTTTGGCCCTCTCCAGGTTACAAGCACCTTTTCCAGCCG  
GTTATCAACCAGGTAGTGGACT

>478

TCTCCCATCCCCTGGGGTGCCAGGTGCCATCTTTGGCCCTCTCCAGGTTACAAGC  
ACCTTTTCCAGCCGGTTATCAACCAGGTAGTGGACTTCTACCAACCCACGTGCATTGTG  
CTCCAGGTAATACTGTCAGTTC

>479

GGGGTGCCAGGTGCCATCTTTGGCCCTCTCCAGGTTACAAGCACCTTTCCAGCCG  
GTTATCAACCAGGTAGTGGACTTCTACCAACCCACGTGCATTGTGCTCCAGGTAATACT  
GTCAGTTCCTCCTCAGGAGTGTT

>480

CAAGCACCTTTCCAGCCGGTTATCAACCAGGTAGTGGACTTCTACCAACCCACGTGC  
ATTGTGCTCCAGGTAATACTGTCAGTTCCTCCTCAGGAGTGTTCTGCCTGGGCTTGGGG  
AAAGAGAGCAAGGGAAGAGGAGG

>481

CAGCCGGTTATCAACCAGGTAGTGGACTTCTACCAACCCACGTGCATTGTGCTCCAGGT  
AATACTGTCAGTTCCTCCTCAGGAGTGTTCTGCCTGGGCTTGGGGAAAGAGAGCAAGG  
GAAGAGGAGGTTCTTTAGGTTGG

>482

CAACCAGGTAGTGGACTTCTACCAACCCACGTGCATTGTGCTCCAGGTAATACTGTCA  
GTTCTCCTCAGGAGTGTTCTGCCTGGGCTTGGGGAAAGAGAGCAAGGGAAGAGGAG  
GTTCTTTAGGTTGGTGGTGAAGGG

>483

CACGTGCATTGTGCTCCAGGTAATACTGTCAGTTCCTCCTCAGGAGTGTTCTGCCTGGG  
CTTGGGGAAAGAGAGCAAGGGAAGAGGAGGTTCTTTAGGTTGGTGGTGAAGGGGTA  
TCTGTGATGTTCTGATCAGTTCTG

>484

CTCCAGGTAATACTGTCAGTTCCTCCTCAGGAGTGTTCTGCCTGGGCTTGGGGAAAGA  
GAGCAAGGGAAGAGGAGGTTCTTTAGGTTGGTGGTGAAGGGGTATCTGTGATGTTCT  
GATCAGTTCTGATCACTGCACTTT

>485

CCAGGTAATACTGTCAGTTCCTCCTCAGGAGTGTTCTGCCTGGGCTTGGGGAAAGAGA  
GCAAGGGAAGAGGAGGTTCTTTAGGTTGGTGGTGAAGGGGTATCTGTGATGTTCTGA  
TCAGTTCTGATCACTGCACTTTCC

>486

GTCAGTTCCTCCTCAGGAGTGTTCTGCCTGGGCTTGGGGAAAGAGAGCAAGGGAAGA  
GGAGGTTCTTTAGGTTGGTGGTGAAGGGGTATCTGTGATGTTCTGATCAGTTCTGATC  
ACTGCACTTTCCTGGGGTTTTGCT

>487

AGGAGTGTTCTGCCTGGGCTTGGGGAAAGAGAGCAAGGGAAGAGGAGGTTCTTTAGG  
TTGGTGGTGAAGGGGTATCTGTGATGTTCTGATCAGTTCTGATCACTGCACTTTCCTG  
GGGTTTTGCTTTTTGCAGTGTGGA

>488

TGGAAGGGGTATCTGTGATGTTCTGATCAGTTCTGATCACTGCACTTTCCTGGGGTTTT  
GCTTTTTGCAGTGTGGAGCTGACTCTCTGGGCTGTGATCGATTGGGCTGCTTTAACCTC  
AGCATCCGAGGGCATGGGTGAG

>489

GGTATCTGTGATGTTCTGATCAGTTCTGATCACTGCACTTTCCTGGGGTTTTGCTTTTTG  
CAGTGTGGAGCTGACTCTCTGGGCTGTGATCGATTGGGCTGCTTTAACCTCAGCATCCG  
AGGGCATGGGTGAGACTTGCT

>490

TGGGGTTTTGCTTTTTGCAGTGTGGAGCTGACTCTCTGGGCTGTGATCGATTGGGCTGC

TTTAACCTCAGCATCCGAGGGCATGGGTGAGACTTGCTCTCCTTCTCTCCCAAGGTT  
TTTAAGTGGCCTTGACTTCAG

>491

TGCTTTTTGCAGTGTGGAGCTGACTCTCTGGGCTGTGATCGATTGGGCTGCTTTAACCT  
CAGCATCCGAGGGCATGGGTGAGACTTGCTCTCCTTCTCTCCCAAGGTTTTAAGTG  
GCCTTGACTTCAGTACGTGGG

>492

ATCGATTGGGCTGCTTTAACCTCAGCATCCGAGGGCATGGGTGAGACTTGCTCTCCTTC  
TTCTCCCAAGGTTTTAAGTGGCCTTGACTTCAGTACGTGGGTGGGGTAGTTGGG  
GAATGGGCCTCACCTCTTCTGG

>493

GCTGCTTTAACCTCAGCATCCGAGGGCATGGGTGAGACTTGCTCTCCTTCTCTCCCA  
AGGTTTTAAGTGGCCTTGACTTCAGTACGTGGGTGGGGTAGTTGGGAATGGGCC  
TCACCTCTTCTTGAAATCAAAA

>494

CATCCGAGGGCATGGGTGAGACTTGCTCTCCTTCTCTCCCAAGGTTTTAAGTGGCC  
TTGACTTCAGTACGTGGGTGGGGTAGTTGGGAATGGGCCTCACCTCTTCTTGAA  
ATCAAAAATAGCTACAAATTGTA

>495

CTTGACTTCAGTACGTGGGTGGGGTAGTTGGGAATGGGCCTCACCTCTTCTTGGA  
AATCAAAAATAGCTACAAATTGACTTGAAGTAAATGTCATCTTGAACAGGGTTCCC  
TAGATGGTCATTATTACGATA

>496

GGGGTAGTTGGGAATGGGCCTCACCTCTTCTTGAAATCAAAAATAGCTACAAATTGT  
ACTTGAAGTAAATGTCATCTTGAACAGGGTCCCTAGATGGTCATTATTACGATAT  
ATTTTTATTAAGCACCTGTTA

>497

GCCTCACCTCTTCTTGAAATCAAAAATAGCTACAAATTGACTTGAAGTAAATGTC  
ATCTTGAACAGGGTCCCTAGATGGTCATTATTACGATATATTTTTATTAAGCACCTGT  
TATGTTCCAGGCATCATAAC

>498

TTCTTGAAATCAAAAATAGCTACAAATTGACTTGAAGTAAATGTCATCTTGAACA  
GGGTTCCCTAGATGGTCATTATTACGATATATTTTTATTAAGCACCTGTTATGTTCCAG  
GCATCATACCACATCATGGG

>499

TTGAAGTAAATGTCATCTTGAACAGGGTCCCTAGATGGTCATTATTACGATATAT  
TTTTATTAAGCACCTGTTATGTTCCAGGCATCATACCACATCATGGGGATGGAATAAGGA  
GTCTCCCATGGAGTTTACAG

>500

TCTTGAACAGGGTCCCTAGATGGTCATTATTACGATATATTTTTATTAAGCACCTGTT  
ATGTTCCAGGCATCATACCACATCATGGGGATGGAATAAGGAGTCTCCCATGGAGTTTA  
CAGTTTAGGAAACAGACAAA

>501

TTCAGGATATATTTTTATTAAGCACCTGTTATGTTCCAGGCATCATACCACATCATGGGGA  
TGGAATAAGGAGTCTCCCATGGAGTTTACAGTTTAGGAAACAGACAAAAAATAAATAA  
TCAAATGAAATAAATAGATTC

>502

TATTAAGCACCTGTTATGTTCCAGGCATCATAACCACATCATGGGGATGGAATAAGGAGT  
CTCCCATGGAGTTTACAGTTTAGGAAACAGACAAAAATAAATAATCAAATGAAATAAA  
TAGATTCTTATAAATTCTGTGA

>503

CACCTGTTATGTTCCAGGCATCATAACCACATCATGGGGATGGAATAAGGAGTCTCCCAT  
GGAGTTTACAGTTTAGGAAACAGACAAAAATAAATAATCAAATGAAATAAATAGATTCT  
TTATAAATTCTGTGAAAGAAAA

>504

GTTATGTTCCAGGCATCATAACCACATCATGGGGATGGAATAAGGAGTCTCCCATGGAGT  
TTACAGTTTACAGTTTAGGAAACAGACAAAAATAAATAATCAAATGAAATAAATAGATTCTTATA  
AATTCTGTGAAAGAAAAAAGA

>505

TCCAGGCATCATAACCACATCATGGGGATGGAATAAGGAGTCTCCCATGGAGTTTACAGT  
TTAGGAAACAGACAAAAATAAATAATCAAATGAAATAAATAGATTCTTATAAATTCTG  
TGAAAGAAAAAAGAAAGCTGA

>506

TAAGGAGTCTCCCATGGAGTTTACAGTTTAGGAAACAGACAAAAATAAATAATCAA  
TGAAATAAATAGATTCTTATAAATTCTGTGAAAGAAAAAAGAAAGCTGAGACACAGG  
ATACAATGGGGGACCTACTTGAGA

>507

ACAGTTTACAGTTTAGGAAACAGACAAAAATAAATAATCAAATGAAATAAATAGATTCTTATAAA  
TTCTGTGAAAGAAAAAAGAAAGCTGAGACACAGGATACAATGGGGGACCTACTTGA  
GATAGCATGGTTTCGGAAGTTTTT

>508

GGAAACAGACAAAAATAAATAATCAAATGAAATAAATAGATTCTTATAAATTCTGTGA  
AAGAAAAAAGAAAGCTGAGACACAGGATACAATGGGGGACCTACTTGAGATAGCAT  
GGTTTCGGAAGTTTTTCTGAGGAA

>509

ATAAATAATCAAATGAAATAAATAGATTCTTATAAATTCTGTGAAAGAAAAAAGAAAG  
CTGAGACACAGGATACAATGGGGGACCTACTTGAGATAGCATGGTTTCGGAAGTTTTT  
CTGAGGAAGTAAATTTGAGTTG

>510

CTTATAAATTCTGTGAAAGAAAAAAGAAAGCTGAGACACAGGATACAATGGGGGAC  
CTACTTGAGATAGCATGGTTTCGGAAGTTTTTCTGAGGAAGTAAATTTGAGTTGAGAC  
CTGGAGACTAAGAAGGAGTGAGTC

>511

GAAAGAAAAAAGAAAGCTGAGACACAGGATACAATGGGGGACCTACTTGAGATAGC  
ATGGTTTCGGAAGTTTTTCTGAGGAAGTAAATTTGAGTTGAGACCTGGAGACTAAGA  
AGGAGTGAGTCATAAGAGGAGCAGA

>512

AAGAAAGCTGAGACACAGGATACAATGGGGGACCTACTTGAGATAGCATGGTTTCGGA  
AGTTTTTCTGAGGAAGTAAATTTGAGTTGAGACCTGGAGACTAAGAAGGAGTGAGT  
CATAAGAGGAGCAGAGAGAAGCCTG

>513

GGGACCTACTTGAGATAGCATGGTTTCGGAAGTTTTTCTGAGGAAGTAAATTTGAGTT

GAGACCTGGAGACTAAGAAGGAGTGAGTCATAAGAGGAGCAGAGAGAAGCCTGACC  
CAAGCATGGACAAAGGCCACAAAA

>514

TACTTGAGATAGCATGGTTTCGGAAGTTTTCTGAGGAAGTAAAATTTGAGTTGAGACC  
TGGAGACTAAGAAGGAGTGAGTCATAAGAGGAGCAGAGAGAAGCCTGACCCAAGCAT  
GGACAAAGGCCACAAAAGGCTCT

>515

TTGAGATAGCATGGTTTCGGAAGTTTTCTGAGGAAGTAAAATTTGAGTTGAGACCTG  
GAGACTAAGAAGGAGTGAGTCATAAGAGGAGCAGAGAGAAGCCTGACCCAAGCATG  
GACAAAGGCCACAAAAGGCTCTGAG

>516

AGATAGCATGGTTTCGGAAGTTTTCTGAGGAAGTAAAATTTGAGTTGAGACCTGGAG  
ACTAAGAAGGAGTGAGTCATAAGAGGAGCAGAGAGAAGCCTGACCCAAGCATGGAC  
AAAGGCCACAAAAGGCTCTGAGGGC

>517

TTTCGGAAGTTTTCTGAGGAAGTAAAATTTGAGTTGAGACCTGGAGACTAAGAAGGA  
GTGAGTCATAAGAGGAGCAGAGAGAAGCCTGACCCAAGCATGGACAAAGGCCACAA  
AAAGGCTCTGAGGGCTGGGCCAGTG

>518

TGAGGAAGTAAAATTTGAGTTGAGACCTGGAGACTAAGAAGGAGTGAGTCATAAGAG  
GAGCAGAGAGAAGCCTGACCCAAGCATGGACAAAGGCCACAAAAGGCTCTGAGGG  
CTGGGCCAGTGGCACACACCTATAAT

>519

CTAAGAAGGAGTGAGTCATAAGAGGAGCAGAGAGAAGCCTGACCCAAGCATGGACA  
AAGGCCACAAAAGGCTCTGAGGGCTGGGCCAGTGGCACACACCTATAATCCCAAC  
ACTTCCAGAGGCCAAGGTGGGAGAATC

>520

GAGTGAGTCATAAGAGGAGCAGAGAGAAGCCTGACCCAAGCATGGACAAAGGCCCA  
CAAAAGGCTCTGAGGGCTGGGCCAGTGGCACACACCTATAATCCCAACACTTCCAGA  
GGCCAAGGTGGGAGAATCGCCTGAGG

>521

AGAGGAGCAGAGAGAAGCCTGACCCAAGCATGGACAAAGGCCACAAAAGGCTCTG  
AGGGCTGGGCCAGTGGCACACACCTATAATCCCAACACTTCCAGAGGCCAAGGTGG  
GAGAATCGCCTGAGGCTAGGAGTTTGA

>522

GGACAAAGGCCACAAAAGGCTCTGAGGGCTGGGCCAGTGGCACACACCTATAATC  
CCAACACTTCCAGAGGCCAAGGTGGGAGAATCGCCTGAGGCTAGGAGTTTGAGGCCA  
GCCTGGGCAACATAGTGAGAGCCATC

>523

GCCCACAAAAGGCTCTGAGGGCTGGGCCAGTGGCACACACCTATAATCCCAACACTT  
CCAGAGGCCAAGGTGGGAGAATCGCCTGAGGCTAGGAGTTTGAGGCCAGCCTGGGCA  
ACATAGTGAGAGCCATCTCTACAGA

>524

AAAGGCTCTGAGGGCTGGGCCAGTGGCACACACCTATAATCCCAACACTTCCAGAGG  
CCAAGGTGGGAGAATCGCCTGAGGCTAGGAGTTTGAGGCCAGCCTGGGCAACATAGT  
GAGAGCCATCTCTACAGAAAATAAA



>525

GGGCTGGGCCAGTGGCACACACCTATAATCCCAACACTTCCAGAGGCCAAGGTGGG  
AGAATCGCCTGAGGCTAGGAGTTTGAGGCCAGCCTGGGCAACATAGTGAGAGCCATCT  
CTACAGAAAATAAAAAACAAAATCA

>526

ACACCTATAATCCCAACACTTCCAGAGGCCAAGGTGGGAGAATCGCCTGAGGCTAGGA  
GTTTGAGGCCAGCCTGGGCAACATAGTGAGAGCCATCTCTACAGAAAATAAAAAACAA  
AATCAGCTGGGCATGATGGTGCAT

>527

TCCAGAGGCCAAGGTGGGAGAATCGCCTGAGGCTAGGAGTTTGAGGCCAGCCTGGGC  
AACATAGTGAGAGCCATCTCTACAGAAAATAAAAAACAAAATCAGCTGGGCATGATGG  
TGCATGCCTATAGTCCTAGCTACTC

>528

GGTGGGAGAATCGCCTGAGGCTAGGAGTTTGAGGCCAGCCTGGGCAACATAGTGAGA  
GCCATCTCTACAGAAAATAAAAAACAAAATCAGCTGGGCATGATGGTGCATGCCTATAG  
TCCTAGCTACTCAGGAAGCTGAGG

>529

CTAGGAGTTTGAGGCCAGCCTGGGCAACATAGTGAGAGCCATCTCTACAGAAAATAAA  
AAACAAAATCAGCTGGGCATGATGGTGCATGCCTATAGTCCTAGCTACTCAGGAAGCT  
GAGGCAGGAGGATCACTTGAGCCT

>530

TGAGAGCCATCTCTACAGAAAATAAAAAACAAAATCAGCTGGGCATGATGGTGCATGC  
CTATAGTCCTAGCTACTCAGGAAGCTGAGGCAGGAGGATCACTTGAGCCTAGGAGTTT  
GAGGTTACAGTGAACATGATTGT

>531

ATCTCTACAGAAAATAAAAAACAAAATCAGCTGGGCATGATGGTGCATGCCTATAGTCC  
TAGCTACTCAGGAAGCTGAGGCAGGAGGATCACTTGAGCCTAGGAGTTTGAGGTTACA  
GTGAACTATGATTGTGCCACTGG

>532

GAAAATAAAAAACAAAATCAGCTGGGCATGATGGTGCATGCCTATAGTCCTAGCTACTC  
AGGAAGCTGAGGCAGGAGGATCACTTGAGCCTAGGAGTTTGAGGTTACAGTGAACAT  
GATTGTGCCACTGGACTTCAGTC

>533

GGGCATGATGGTGCATGCCTATAGTCCTAGCTACTCAGGAAGCTGAGGCAGGAGGATC  
ACTTGAGCCTAGGAGTTTGAGGTTACAGTGAACATGATTGTGCCACTGGACTTCAGTC  
TGTTGAGGTGAGGTCCGAGAAGC

>534

GCCTATAGTCCTAGCTACTCAGGAAGCTGAGGCAGGAGGATCACTTGAGCCTAGGAGT  
TTGAGGTTACAGTGAACATGATTGTGCCACTGGACTTCAGTCTGTTGAGGTGAGGTC  
CGAGAAGCTGGCCATGGTGAAGAT

>535

AGGCAGGAGGATCACTTGAGCCTAGGAGTTTGAGGTTACAGTGAACATGATTGTGCC  
ACTGGACTTCAGTCTGTTGAGGTGAGGTCCGAGAAGCTGGCCATGGTGAAGATTGTGC  
ATGAGCCTTTAAACCCTGGTAAGG

>536

GATCACTTGAGCCTAGGAGTTTGAGGTTACAGTGAACATGATTGTGCCACTGGACTTC

AGTCTGTTGAGGTGAGGTCCGAGAAGCTGGCCATGGTGAAGATTGTGCATGAGCCTTT  
AAACCCTGGTAAGGAGTTTGAAT

>537

AGTGAACACTATGATTGTGCCACTGGACTTCAGTCTGTTGAGGTGAGGTCCGAGAAGCTG  
GCCATGGTGAAGATTGTGCATGAGCCTTTAAACCCTGGTAAGGAGTTTGAATTATATTC  
CAAAGATGATGGGAAACCATTGA

>538

TTGTGCCACTGGACTTCAGTCTGTTGAGGTGAGGTCCGAGAAGCTGGCCATGGTGAAG  
ATTGTGCATGAGCCTTTAAACCCTGGTAAGGAGTTTGAATTATATTTCAAAGATGATGG  
GAAACCATTGAAGGATTTTAAGC

>539

GTCTGTTGAGGTGAGGTCCGAGAAGCTGGCCATGGTGAAGATTGTGCATGAGCCTTTA  
AACCTGGTAAGGAGTTTGAATTATATTTCAAAGATGATGGGAAACCATTGAAGGATTT  
TAAGCAGGAAAGTGACATGATCC

>540

AAGCTGGCCATGGTGAAGATTGTGCATGAGCCTTTAAACCCTGGTAAGGAGTTTGAATT  
ATATTTCAAAGATGATGGGAAACCATTGAAGGATTTTAAGCAGGAAAGTGACATGATC  
CAATTTGTGTTTAAAAGTGACAA

>541

TGTGCATGAGCCTTTAAACCCTGGTAAGGAGTTTGAATTATATTTCAAAGATGATGGGA  
AACCTTTGAAGGATTTTAAAGCAGGAAAGTGACATGATCCAATTTGTGTTTAAAAGTGA  
CAATTTGACTGCTGAATAGAGA

>542

GCCTTTAAACCCTGGTAAGGAGTTTGAATTATATTTCAAAGATGATGGGAAACCATTGA  
AGGATTTTAAAGCAGGAAAGTGACATGATCCAATTTGTGTTTAAAAGTGACAATTCTGA  
CTGCTGAATAGAGAAAAGTTTGG

>543

CCAAAGATGATGGGAAACCATTGAAGGATTTTAAAGCAGGAAAGTGACATGATCCAATT  
TGTGTTTAAAAGTGACAATTCTGACTGCTGAATAGAGAAAAGTTTGGGTAGGGGGGAT  
GGAGATGGAAGTAGAAGAGACCTA

>544

AAGGATTTTAAAGCAGGAAAGTGACATGATCCAATTTGTGTTTAAAAGTGACAATTCTG  
ACTGCTGAATAGAGAAAAGTTTGGGTAGGGGGGATGGAGATGGAAGTAGAAGAGACC  
TAGTTAGGAAGCCATGGTGTGGTT

>545

AAAGTGACATGATCCAATTTGTGTTTAAAAGTGACAATTCTGACTGCTGAATAGAGAA  
AGGTTTGGGTAGGGGGGATGGAGATGGAAGTAGAAGAGACCTAGTTAGGAAGCCATG  
GTGTTGTTAGGTGCCAGACTAAG

>546

TTGTGTTTAAAAGTGACAATTCTGACTGCTGAATAGAGAAAAGTTTGGGTAGGGGGGA  
TGGAGATGGAAGTAGAAGAGACCTAGTTAGGAAGCCATGGTGTGGTTAGGTGCCAG  
ACTAAGGTGGAGGGGGTGGCAATG

>547

TGTTTAAAAGTGACAATTCTGACTGCTGAATAGAGAAAAGTTTGGGTAGGGGGGATGG  
AGATGGAAGTAGAAGAGACCTAGTTAGGAAGCCATGGTGTGGTTAGGTGCCAGACT  
AAGGTGGAGGGGGTGGCAATGGAG

>548

GAAAGTGACAATTCTGACTGCTGAATAGAGAAAGGTTTGGGTAGGGGGGATGGAGAT  
GGAAGTAGAAGAGACCTAGTTAGGAAGCCATGGTGTGGTTAGGTGCCCAGACTAAG  
GTGGAGGGGGTGGCAATGGAGAGAAG

>549

ATTCTGACTGCTGAATAGAGAAAGGTTTGGGTAGGGGGGATGGAGATGGAAGTAGAA  
GAGACCTAGTTAGGAAGCCATGGTGTGGTTAGGTGCCCAGACTAAGGTGGAGGGGG  
TGGCAATGGAGAGAAGTAGATGATCT

>550

GGGTAGGGGGGATGGAGATGGAAGTAGAAGAGACCTAGTTAGGAAGCCATGGTGTGG  
GTTAGGTGCCCAGACTAAGGTGGAGGGGGTGGCAATGGAGAGAAGTAGATGATCTGA  
GAGGTGTGTGTGTGTGTGTGTATA

>551

TGGAGATGGAAGTAGAAGAGACCTAGTTAGGAAGCCATGGTGTGGTTAGGTGCCCAG  
ACTAAGGTGGAGGGGGTGGCAATGGAGAGAAGTAGATGATCTGAGAGGTGTGTGTGT  
GTGTGTGTATATATATATATATA

>552

AAGAGACCTAGTTAGGAAGCCATGGTGTGGTTAGGTGCCCAGACTAAGGTGGAGGG  
GGTGGCAATGGAGAGAAGTAGATGATCTGAGAGGTGTGTGTGTGTGTGTATATAT  
ATATATACACACACACACACAC

>553

GAGACCTAGTTAGGAAGCCATGGTGTGGTTAGGTGCCCAGACTAAGGTGGAGGGGG  
TGGCAATGGAGAGAAGTAGATGATCTGAGAGGTGTGTGTGTGTGTGTATATATAT  
ATATATACACACACACACACAT

>554

CATGGTGTGGTTAGGTGCCCAGACTAAGGTGGAGGGGGTGGCAATGGAGAGAAGTA  
GATGATCTGAGAGGTGTGTGTGTGTGTGTATATATATATATACACACACACACA  
CACATATATATGTTTTTTTTTTT

>555

GTGTGTGTATATATATATATACACACACACACACATATATATGTTTTTTTTTTCT  
TTTTTGAGATGGAGTCTTGCTCTGTCACCCAGGCTGGAGTGCAGTGGCACGATCTTGG  
CTCAGTGCAAGCTCTGCCTC

>556

GTGTATATATATATATACACACACACACACATATATATGTTTTTTTTTTCTTTTTTG  
AGATGGAGTCTTGCTCTGTCACCCAGGCTGGAGTGCAGTGGCACGATCTTGGCTCAGT  
GCAAGCTCTGCCTCCTGGGT

>557

ACACACACACACACATATATATGTTTTTTTTTTCTTTTTTGAGATGGAGTCTTGCTC  
TGTCACCCAGGCTGGAGTGCAGTGGCACGATCTTGGCTCAGTGCAAGCTCTGCCTCCT  
GGGTTCAAGCATTCTCCTGCC

>558

CACACACACATATATATGTTTTTTTTTTCTTTTTTGAGATGGAGTCTTGCTCTGTCACCC  
AGGCTGGAGTGCAGTGGCACGATCTTGGCTCAGTGCAAGCTCTGCCTCCTGGGTTCAA  
GCATTTCTCCTGCCTCAGCCT

>559

TTTTTCTTTTTTGAGATGGAGTCTTGCTCTGTCACCCAGGCTGGAGTGCAGTGGCACGA

TCTTGGCTCAGTGCAAGCTCTGCCTCCTGGGTTCAAGCATTTCTCCTGCCTCAGCCTCC  
TGAGTAGCTGGGACTACTACAA

>560

CTCTGTCACCCAGGCTGGAGTGCAGTGGCACGATCTTGGCTCAGTGCAAGCTCTGCCT  
CCTGGGTTCAAGCATTTCTCCTGCCTCAGCCTCCTGAGTAGCTGGGACTACTACAAAG  
GCGTGAGCACCGCGCCGGGCGTGA

>561

GAGTGCAGTGGCACGATCTTGGCTCAGTGCAAGCTCTGCCTCCTGGGTTCAAGCATTT  
CTCCTGCCTCAGCCTCCTGAGTAGCTGGGACTACTACAAAGGCGTGAGCACCGCGCCG  
GGCGTGAGTTATATTTTCAAGGCT

>562

CAAGCTCTGCCTCCTGGGTTCAAGCATTTCTCCTGCCTCAGCCTCCTGAGTAGCTGGGA  
CTACTACAAAGGCGTGAGCACCGCGCCGGGCGTGAGTTATATTTTCAAGGCTAGAATT  
GACAGAACTTGGGTTGATGAGAA

>563

TGCCTCCTGGGTTCAAGCATTTCTCCTGCCTCAGCCTCCTGAGTAGCTGGGACTACTAC  
AAAGGCGTGAGCACCGCGCCGGGCGTGAGTTATATTTTCAAGGCTAGAATTGACAGAA  
CTTGGGTTGATGAGAATAGTTGA

>564

ATTTCTCCTGCCTCAGCCTCCTGAGTAGCTGGGACTACTACAAAGGCGTGAGCACCGC  
GCCGGGCGTGAGTTATATTTTCAAGGCTAGAATTGACAGAACTTGGGTTGATGAGAATA  
GTTGATTAGCAGGCAGGGTGCCA

>565

TCCTGAGTAGCTGGGACTACTACAAAGGCGTGAGCACCGCGCCGGGCGTGAGTTATAT  
TTTCAAGGCTAGAATTGACAGAACTTGGGTTGATGAGAATAGTTGATTAGCAGGCAGG  
GTGCCAGGGAGGGTGTGAGCAGA

>566

AGGCGTGAGCACCGCGCCGGGCGTGAGTTATATTTTCAAGGCTAGAATTGACAGAACT  
TGGGTTGATGAGAATAGTTGATTAGCAGGCAGGGTGCCAGGGAGGGTGTGAGCAGA  
ACAGAGGGGGACTGTGCTTTATTT

>567

TGAGCACCGCGCCGGGCGTGAGTTATATTTTCAAGGCTAGAATTGACAGAACTTGGGT  
TGATGAGAATAGTTGATTAGCAGGCAGGGTGCCAGGGAGGGTGTGAGCAGAACAGA  
GGGGGGACTGTGCTTTATTTTAAAA

>568

GCGTGAGTTATATTTTCAAGGCTAGAATTGACAGAACTTGGGTTGATGAGAATAGTTGA  
TTAGCAGGCAGGGTGCCAGGGAGGGTGTGAGCAGAACAGAGGGGGACTGTGCTTT  
ATTTTAAAATTTTATTGAGACAC

>569

CAGAACTTGGGTTGATGAGAATAGTTGATTAGCAGGCAGGGTGCCAGGGAGGGTGTG  
AGCAGAACAGAGGGGGACTGTGCTTTATTTTAAAATTTTATTGAGACACAGCATATA  
AAGTATACCCAATCTTAAGGGT

>570

GCAGGGTGCCAGGGAGGGTGTGAGCAGAACAGAGGGGGACTGTGCTTTATTTTAA  
AATTTTATTGAGACACAGCATATAAAGTATACCCAATCTTAAGGGTATAACATAATGA  
ATTTCACTATCAAGATAAAGATT

>571

TGCCAGGGAGGGTGTGAGCAGAACAGAGGGGGGACTGTGCTTTATTTTAAAATTTT  
ATTGAGACACAGCATATAAAGTATACCCAAATCTTAAGGGTATAACATAATGAATTCAC  
TATCAAGATAAAGATTTAGAAC

>572

GAGGGGGGACTGTGCTTTATTTTAAAATTTTATTGAGACACAGCATATAAAGTATACCC  
AAATCTTAAGGGTATAACATAATGAATTCCTATCAAGATAAAGATTTAGAACATTTAT  
AGTTTTCTTGCTCCTTC

>573

TTTATTGAGACACAGCATATAAAGTATACCCAAATCTTAAGGGTATAACATAATGAATTT  
CACTATCAAGATAAAGATTTAGAACATTTATAGTTTTCTTGCTCCTTTCAGGCAATAC  
CTAAAGGTATTTACCTTGTC

>574

CAGCATATAAAGTATACCCAAATCTTAAGGGTATAACATAATGAATTTCACTATCAAGAT  
AAAGATTTAGAACATTTATAGTTTTCTTGCTCCTTTCAGGCAATACCTAAAGGTATTT  
ACCTTGCTTTTTGATAACCT

>575

GTATACCCAAATCTTAAGGGTATAACATAATGAATTTCACTATCAAGATAAAGATTTAGA  
ACATTTATAGTTTTCTTGCTCCTTTCAGGCAATACCTAAAGGTATTTACCTTGCTTTTT  
GATAACCTCCTCCACATCT

>576

TATAACATAATGAATTTCACTATCAAGATAAAGATTTAGAACATTTATAGTTTTCTTGCT  
TCCTTTCAGGCAATACCTAAAGGTATTTACCTTGCTTTTTGATAACCTCCTCCACATCTT  
CCTCTGGTTCCTTTAACA

>577

ATTTCACTATCAAGATAAAGATTTAGAACATTTATAGTTTTCTTGCTCCTTTCAGGCA  
ATACCTAAAGGTATTTACCTTGCTTTTTGATAACCTCCTCCACATCTTCTCTGGTTCCTT  
TTAACAGGGAATGCGTTGA

>578

TGCTTTTTGATAACCTCCTCCACATCTTCTCTGGTTCCTTTAACAGGGAATGCGTTGA  
ATATGTCAAGAGCTTCAATATCCCTCTACTCGTGCTGGGTGGTGGTTATACTGTCCG  
AAATGTTGCCCGCTGCTGGT

>579

TTCAATATCCCTCTACTCGTGCTGGGTGGTGGTGGTTATACTGTCCGAAATGTTGCCCGC  
TGCTGGTGAGCACTCTCCTGATTTCTCCCTGTTGTCCAGTGTGAGCTAGGGTGTCCC  
TCAGATATGGCCACATGGGCC

>580

GTGGTTATACTGTCCGAAATGTTGCCCGCTGCTGGTGAGCACTCTCCTGATTTCTCCC  
CTGTTGTCCAGTGTGAGCTAGGGTGTCCCTCAGATATGGCCACATGGGCCCTTCAGCCC  
ACTTGGTCAGCCTGCTCCCCTC

>581

TGTCCGAAATGTTGCCCGCTGCTGGTGAGCACTCTCCTGATTTCTCCCTGTTGTCCA  
GTGTGAGCTAGGGTGTCCCTCAGATATGGCCACATGGGCCCTTCAGCCCACTGGTCA  
GCCTGCTCCCCTCTGCTGGTTGG

>582

CCTGATTTCTCCCTGTTGTCCAGTGTGAGCTAGGGTGTCCCTCAGATATGGCCACAT

GGGCCCTTCAGCCCACTTGGTCAGCCTGCTCCCCTCTGCTGGTTGGTTTCAGGACATAT  
GAGACATCGCTGCTGGTAGAAG

>583

CCTGTTGTCCAGTGTGAGCTAGGGTGTCCCTCAGATATGGCCACATGGGCCCTTCAGCC  
CACTTGGTCAGCCTGCTCCCCTCTGCTGGTTGGTTTCAGGACATATGAGACATCGCTGC  
TGGTAGAAGAGGCCATTAGTGA

>584

CCTCAGATATGGCCACATGGGCCCTTCAGCCCACTTGGTCAGCCTGCTCCCCTCTGCTG  
GTTGGTTTCAGGACATATGAGACATCGCTGCTGGTAGAAGAGGCCATTAGTGAGGAGC  
TTCCCTATAGTGGTAAGGACACC

>585

GGCCACATGGGCCCTTCAGCCCACTTGGTCAGCCTGCTCCCCTCTGCTGGTTGGTTTCA  
GGACATATGAGACATCGCTGCTGGTAGAAGAGGCCATTAGTGAGGAGCTTCCCTATAGT  
GGTAAGGACACCCACAACACCC

>586

CAGCCCACTTGGTCAGCCTGCTCCCCTCTGCTGGTTGGTTTCAGGACATATGAGACATC  
GCTGCTGGTAGAAGAGGCCATTAGTGAGGAGCTTCCCTATAGTGGTAAGGACACCCAC  
AACACCCATAACAGGAAGGCCA

>587

CTCCCCTCTGCTGGTTGGTTTCAGGACATATGAGACATCGCTGCTGGTAGAAGAGGCCA  
TTAGTGAGGAGCTTCCCTATAGTGGTAAGGACACCCACAACACCCATAACAGGAAGG  
CCATTCTCACCAGATTCCAGAAT

>588

TGTTGGTTTCAGGACATATGAGACATCGCTGCTGGTAGAAGAGGCCATTAGTGAGGA  
GCTTCCCTATAGTGGTAAGGACACCCACAACACCCATAACAGGAAGGCCATTCTCAC  
CAGATTCCAGAATGACCTGGTTTG

>589

TTTCAGGACATATGAGACATCGCTGCTGGTAGAAGAGGCCATTAGTGAGGAGCTTCCCT  
ATAGTGGTAAGGACACCCACAACACCCATAACAGGAAGGCCATTCTCACCAGATTCC  
AGAATGACCTGGTTTGAAGGCAC

>590

GCTGGTAGAAGAGGCCATTAGTGAGGAGCTTCCCTATAGTGGTAAGGACACCCACAAC  
ACCCATAACAGGAAGGCCATTCTCACCAGATTCCAGAATGACCTGGTTTGAAGGCAC  
ATGGGAAATTTTACTCTCAGAG

>591

TAGTGAGGAGCTTCCCTATAGTGGTAAGGACACCCACAACACCCATAACAGGAAGGC  
CATTCTCACCAGATTCCAGAATGACCTGGTTTGAAGGCACATGGGAAATTTTACTCT  
CAGAGCTCTGCAGACTAAACCCC

>592

TAAGGACACCCACAACACCCATAACAGGAAGGCCATTCTCACCAGATTCCAGAATGA  
CCTGGTTTGAAGGCACATGGGAAATTTTACTCTCAGAGCTCTGCAGACTAAACCCC  
TGGGCTCAGAGCAGGGAAGAGATT

>593

AGGAAGGCCATTCTCACCAGATTCCAGAATGACCTGGTTTGAAGGCACATGGGAAATT  
TTACTCTCAGAGCTCTGCAGACTAAACCCCTGGGCTCAGAGCAGGGAAGAGATTG  
GGCAGCTATTATGTAGGTGCTCTGG

>594

TGACCTGGTTTGAAGGCACATGGGAAATTTTACACTCTCAGAGCTCTGCAGACTAAAC  
CCCTGGGCTCAGAGCAGGGAAGAGATTGGGCAGCTATTATGTAGGTGCTCTGGATGGG  
AAGGAAAAAGATTGGGAAGTCTTG

>595

ACCTGGTTTGAAGGCACATGGGAAATTTTACACTCTCAGAGCTCTGCAGACTAAACCC  
CTGGGCTCAGAGCAGGGAAGAGATTGGGCAGCTATTATGTAGGTGCTCTGGATGGGAA  
GGAAAAAGATTGGGAAGTCTTGTT

>596

AAGGCACATGGGAAATTTTACACTCTCAGAGCTCTGCAGACTAAACCCCTGGGCTCAG  
AGCAGGGAAGAGATTGGGCAGCTATTATGTAGGTGCTCTGGATGGGAAGGAAAAAGAT  
TGGGAAGTCTTGTTAGCTGCCTTT

>597

AGACTAAACCCCTGGGCTCAGAGCAGGGAAGAGATTGGGCAGCTATTATGTAGGTGCT  
CTGGATGGGAAGGAAAAAGATTGGGAAGTCTTGTTAGCTGCCTTTCTCAGTCTGAGCC  
ATACTTTCTCCTCTCCTCCCAAG

>598

ACCCCTGGGCTCAGAGCAGGGAAGAGATTGGGCAGCTATTATGTAGGTGCTCTGGATG  
GGAAGGAAAAAGATTGGGAAGTCTTGTTAGCTGCCTTTCTCAGTCTGAGCCATACTTT  
CTCCTCTCCTCCCAAGAATACTT

>599

CTCAGAGCAGGGAAGAGATTGGGCAGCTATTATGTAGGTGCTCTGGATGGGAAGGAAA  
AAGATTGGGAAGTCTTGTTAGCTGCCTTTCTCAGTCTGAGCCATACTTTCTCCTCTCCT  
CCCAAGAATACTTCGAGTACTT

>600

GGGAAGAGATTGGGCAGCTATTATGTAGGTGCTCTGGATGGGAAGGAAAAAGATTGGG  
AAGTCTTGTTAGCTGCCTTTCTCAGTCTGAGCCATACTTTCTCCTCTCCTCCCAAGAAT  
ACTTCGAGTACTTTGCCCCAGA

>601

GGAAGTCTTGTTAGCTGCCTTTCTCAGTCTGAGCCATACTTTCTCCTCTCCTCCCAAG  
AATACTTCGAGTACTTTGCCCCAGACTTCACACTTCATCCAGATGTCAGCACCCGCATC  
GAGAATCAGAACTCACGCCAGG

>602

GCTGCCTTTCTCAGTCTGAGCCATACTTTCTCCTCTCCTCCCAAGAATACTTCGAGTAC  
TTTGCCCCAGACTTCACACTTCATCCAGATGTCAGCACCCGCATCGAGAATCAGAACT  
CACGCCAGGTCAGCAGCTCAGA

>603

TCCCAAGAATACTTCGAGTACTTTGCCCCAGACTTCACACTTCATCCAGATGTCAGCA  
CCCGCATCGAGAATCAGAACTCACGCCAGGTCAGCAGCTCAGAAAAGCTGAGCACAA  
ACTTCTCCTGAAAGGTGGAGCCCA

>604

AGAATACTTCGAGTACTTTGCCCCAGACTTCACACTTCATCCAGATGTCAGCACCCGCA  
TCGAGAATCAGAACTCACGCCAGGTCAGCAGCTCAGAAAAGCTGAGCACAACTTCT  
CCTGAAAGGTGGAGCCAGGAGAG

>605

GTACTTTGCCCCAGACTTCACACTTCATCCAGATGTCAGCACCCGCATCGAGAATCAGA

ACTCACGCCAGGTCAGCAGCTCAGAAAAGCTGAGCACAACTTCTCCTGAAAGGTGG  
AGCCCAGGAGAGGTCAAAGATGTG

>606

CCGCATCGAGAATCAGAACTCACGCCAGGTCAGCAGCTCAGAAAAGCTGAGCACAAA  
CTTCTCCTGAAAGGTGGAGCCCAGGAGAGGTCAAAGATGTGGGAAGTAGGAAAAACC  
AAAGAGAAGGAAGTTCTAAGCCATCA

>607

CGAGAATCAGAACTCACGCCAGGTCAGCAGCTCAGAAAAGCTGAGCACAACTTCTC  
CTGAAAGGTGGAGCCCAGGAGAGGTCAAAGATGTGGGAAGTAGGAAAAACCAAAGA  
GAAGGAAGTTCTAAGCCATCACAGTCA

>608

GCCAGGTCAGCAGCTCAGAAAAGCTGAGCACAACTTCTCCTGAAAGGTGGAGCCCA  
GGAGAGGTCAAAGATGTGGGAAGTAGGAAAAACCAAAGAGAAGGAAGTTCTAAGCC  
ATCACAGTCACTGTTATTGACTAGGAG

>609

CAAATTCTCCTGAAAGGTGGAGCCCAGGAGAGGTCAAAGATGTGGGAAGTAGGAAA  
AACCAAAGAGAAGGAAGTTCTAAGCCATCACAGTCACTGTTATTGACTAGGAGGCAGT  
CCAGTTAAAGTAGAGGCAGTTGGG

>610

CTTCTCCTGAAAGGTGGAGCCCAGGAGAGGTCAAAGATGTGGGAAGTAGGAAAAACC  
AAAGAGAAGGAAGTTCTAAGCCATCACAGTCACTGTTATTGACTAGGAGGCAGTCCAG  
TTTAAAGTAGAGGCAGTTGGGGTTG

>611

TGAAAGGTGGAGCCCAGGAGAGGTCAAAGATGTGGGAAGTAGGAAAAACCAAAGAG  
AAGGAAGTTCTAAGCCATCACAGTCACTGTTATTGACTAGGAGGCAGTCCAGTTAAA  
GTAGAGGCAGTTGGGGTTGGTGGGGA

>612

AAGATGTGGGAAGTAGGAAAAACCAAAGAGAAGGAAGTTCTAAGCCATCACAGTCAC  
TGTTATTGACTAGGAGGCAGTCCAGTTTAAAGTAGAGGCAGTTGGGGTTGGTGGGGAG  
GGAGAGCTATCAGTTGGGGGACCTG

>613

CCAAAGAGAAGGAAGTTCTAAGCCATCACAGTCACTGTTATTGACTAGGAGGCAGTCC  
AGTTTAAAGTAGAGGCAGTTGGGGTTGGTGGGGAGGGAGAGCTATCAGTTGGGGGAC  
CTGAACTAGAGGTACCACTGAGATG

>614

AAAGAGAAGGAAGTTCTAAGCCATCACAGTCACTGTTATTGACTAGGAGGCAGTCCAG  
TTTAAAGTAGAGGCAGTTGGGGTTGGTGGGGAGGGAGAGCTATCAGTTGGGGGACCT  
GAACTAGAGGTACCACTGAGATGAA

>615

AGAAGGAAGTTCTAAGCCATCACAGTCACTGTTATTGACTAGGAGGCAGTCCAGTTTA  
AAGTAGAGGCAGTTGGGGTTGGTGGGGAGGGAGAGCTATCAGTTGGGGGACCTGAAC  
TAGAGGTACCACTGAGATGAAAACC

>616

CATCACAGTCACTGTTATTGACTAGGAGGCAGTCCAGTTTAAAGTAGAGGCAGTTGGG  
GTTGGTGGGGAGGGAGAGCTATCAGTTGGGGGACCTGAACTAGAGGTACCACTGAGA  
TGAAAACCAGTATGGTAGGGGTAAA



>617

GTCCAGTTTAAAGTAGAGGCAGTTGGGGTTGGTGGGGAGGGAGAGCTATCAGTTGGG  
GGACCTGAACTAGAGGTACCACTGAGATGAAAACCAGTATGGTAGGGGTAAAAGGCA  
GCTAGGAGATTCCATGTCCTGGGAAT

>618

TAGAGGCAGTTGGGGTTGGTGGGGAGGGAGAGCTATCAGTTGGGGGACCTGAACTAG  
AGGTACCACTGAGATGAAAACCAGTATGGTAGGGGTAAAAGGCAGCTAGGAGATTCCA  
TGTCTGGGAATCTCTGGAACTGC

>619

GGGGTTGGTGGGGAGGGAGAGCTATCAGTTGGGGGACCTGAACTAGAGGTACCACTG  
AGATGAAAACCAGTATGGTAGGGGTAAAAGGCAGCTAGGAGATTCCATGTCCTGGGAA  
TCTCTGGAACTGCTCACTCTGTAT

>620

AGAGCTATCAGTTGGGGGACCTGAACTAGAGGTACCACTGAGATGAAAACCAGTATGG  
TAGGGGTAAAAGGCAGCTAGGAGATTCCATGTCCTGGGAATCTCTGGAACTGCTCAC  
TCTGTATTCCTCATTCCAACAG

>621

TTCCATGTCCTGGGAATCTCTGGAACTGCTCACTCTGTATTCTCATTCCAACAGTA  
TCTGGACCAGATCCGCCAGACAATCTTTGAAAACCTGAAGATGCTGAACCATGCACCT  
AGTGTCCAGATTCATGACGTGC

>622

CTGGGAATCTCTGGAACTGCTCACTCTGTATTCTCATTCCAACAGTATCTGGACC  
AGATCCGCCAGACAATCTTTGAAAACCTGAAGATGCTGAACCATGCACCTAGTGCCA  
GATTCATGACGTGCCTGCAGACC

>623

TCACTCTGTATTCTCATTCCAACAGTATCTGGACCAGATCCGCCAGACAATCTTTG  
AAAACCTGAAGATGCTGAACCATGCACCTAGTGCCAGATTCATGACGTGCCTGCAGA  
CCTCCTGACCTATGACAGGACTG

>624

CCAACAGTATCTGGACCAGATCCGCCAGACAATCTTTGAAAACCTGAAGATGCTGAA  
CCATGCACCTAGTGCCAGATTCATGACGTGCCTGCAGACCTCCTGACCTATGACAGGA  
CTGATGAGGCTGATGCAGAGGAG

>625

CAGACAATCTTTGAAAACCTGAAGATGCTGAACCATGCACCTAGTGCCAGATTCATG  
ACGTGCCTGCAGACCTCCTGACCTATGACAGGACTGATGAGGCTGATGCAGAGGAGA  
GGGGTCCTGAGGAGAACTATAGCAG

>626

TGAAGATGCTGAACCATGCACCTAGTGCCAGATTCATGACGTGCCTGCAGACCTCCT  
GACCTATGACAGGACTGATGAGGCTGATGCAGAGGAGAGGGGTCTGAGGAGAACTA  
TAGCAGGTCTGGGAGCAGGGACTTC

>627

CCTAGTGCCAGATTCATGACGTGCCTGCAGACCTCCTGACCTATGACAGGACTGATGA  
GGCTGATGCAGAGGAGAGGGTCTGAGGAGAACTATAGCAGGTCTGGGAGCAGGGA  
CTTCAGCCTACTTTCAATAGGCTT

>628

TCCAGATTCATGACGTGCCTGCAGACCTCCTGACCTATGACAGGACTGATGAGGCTGAT

GCAGAGGAGAGGGGCTCTGAGGAGAACTATAGCAGGTCTGGGAGCAGGGACTTCAGC  
CTACTTTCAATAGGCTTGCTGGGG

>629

TGACGTGCCTGCAGACCTCCTGACCTATGACAGGACTGATGAGGCTGATGCAGAGGAG  
AGGGGCTCTGAGGAGAACTATAGCAGGTCTGGGAGCAGGGACTTCAGCCTACTTTCAA  
TAGGCTTGCTGGGGAGGTTTAAAA

>630

CGTGCCTGCAGACCTCCTGACCTATGACAGGACTGATGAGGCTGATGCAGAGGAGAG  
GGGCTCTGAGGAGAACTATAGCAGGTCTGGGAGCAGGGACTTCAGCCTACTTTCAATA  
GGCTTGCTGGGGAGGTTTAAAAGGG

>631

CCTATGACAGGACTGATGAGGCTGATGCAGAGGAGAGGGGCTCTGAGGAGAACTATA  
GCAGGTCTGGGAGCAGGGACTTCAGCCTACTTTCAATAGGCTTGCTGGGGAGGTTTAA  
AAGGGAAAAAGTAAATGGGAAGGTA

>632

GTCCTGAGGAGAACTATAGCAGGTCTGGGAGCAGGGACTTCAGCCTACTTTCAATAGG  
CTTGCTGGGGAGGTTTAAAAGGGAAAAAGTAAATGGGAAGGTATTAGTTTAAATTGCCT  
CTGGCTTACCTCCTTTAGTCTGCT

>633

AGAACTATAGCAGGTCTGGGAGCAGGGACTTCAGCCTACTTTCAATAGGCTTGCTGGG  
GAGGTTTAAAAGGGAAAAAGTAAATGGGAAGGTATTAGTTTAAATTGCCTCTGGCTTAC  
CTCCTTTAGTCTGCTACAATTTCC

>634

GAGCAGGGACTTCAGCCTACTTTCAATAGGCTTGCTGGGGAGGTTTAAAAGGGAAAA  
AGTAAATGGGAAGGTATTAGTTTAAATGCCTCTGGCTTACCTCCTTTAGTCTGCTACAAT  
TTCCTCACTCTTTTCTTTGTTAT

>635

GGGGAGGTTTAAAAGGGAAAAAGTAAATGGGAAGGTATTAGTTTAAATTGCCTCTGGCT  
TACCTCCTTTAGTCTGCTACAATTCCTCACTCTTTTCTTTGTTATTTTAAATGACAAAAG  
TAACACGTATTTATTGCAAAA

>636

CCTCTGGCTTACCTCCTTTAGTCTGCTACAATTCCTCACTCTTTTCTTTGTTATTTTAA  
TGACAAAAGTAACACGTATTTATTGCAAAAATTTAAAACAGCACCAAAATATGGTGTTG  
GCGTTCACACAATCCCAGAC

>637

TTCCTCACTCTTTTCTTTGTTATTTTAAATGACAAAAGTAACACGTATTTATTGCAAAATT  
TAAAACAGCACCAAAATATGGTGTTGGCGTTCACACAATCCCAGACCTATTCCACAG  
GAGTAACCACTGTTAATAGTT

>638

AGTAACACGTATTTATTGCAAAAATTTAAAACAGCACCAAAATATGGTGTTGGCGTTCA  
CAATCCCAGACCTATTCCACAGGAGTAACCACTGTTAATAGTTTTTATTGTTTTGGAT  
AGACCTTTTTCTATAGATTGC

>639

TATTGCAAAAATTTAAAACAGCACCAAAATATGGTGTTGGCGTTCACACAATCCCAGAC  
CTATTCCACAGGAGTAACCACTGTTAATAGTTTTTATTGTTTTGGATAGACCTTTTTCTAT  
AGATTGCAAAATATACTATTC

>640

AGCACAAAATATGGTGTGGCGTTCACACAATCCCAGACCTATTCCACAGGAGTAAC  
CACTGTTAATAGTTTTATTGTTTTGGATAGACCTTTTTCTATAGATTGCAAATATACTATT  
CTGTATGTACATATAAACA

>641

GGCGTTCACACAATCCCAGACCTATTCCACAGGAGTAACCACTGTTAATAGTTTTATT  
GTTTTGGATAGACCTTTTTCTATAGATTGCAAATATACTATTCTGTATGTACATATAAACA  
AACACATATACTCATTTA

>642

CCCAGACCTATTCCACAGGAGTAACCACTGTTAATAGTTTTATTGTTTTGGATAGACCT  
TTTTCTATAGATTGCAAATATACTATTCTGTATGTACATATAAACAACACATATACTC  
ATTTACAGTTTGTGTGGTT

>643

TTTTCTATAGATTGCAAATATACTATTCTGTATGTACATATAAACAACACATATACT  
CATTTACAGTTTGTGTGGTTTTGGTTTTCCGTAAATACAAATAGGGTCATTCTACGTA  
TGCTGCTTTACATCATATA

>644

CATATAAACAACACATATACTCATTACAGTTTGTGTGGTTTTGGTTTTCCGTAA  
ATACAAATAGGGTCATTCTACGTATGCTGCTTTACATCATATAGCTGTTTCAGCTAGCTA  
ATATAGATCTGCTTCAGTA

>645

TTGTGTGGTTTTGGTTTTCCGTAAATACAAATAGGGTCATTCTACGTATGCTGCTTTA  
CATCATATAGCTGTTTCAGCTAGCTAATATAGATCTGCTTCAGTATTTATCAGCTGTAT  
AATAATTTACTATGTGGAT

>646

TTTGGTTTTCCGTAAATACAAATAGGGTCATTCTACGTATGCTGCTTTACATCATATAGC  
TGTTTTCAGCTAGCTAATATAGATCTGCTTCAGTATTTATCAGCTGTATAATAATTTACTA  
TGTGGATAGATTATTTT

>647

AGGGTCATTCTACGTATGCTGCTTTACATCATATAGCTGTTTCAGCTAGCTAATATAGAT  
CTGCTTCAGTATTTATCAGCTGTATAATAATTTACTATGTGGATAGATTATTTCCATTT  
TTTGGTATTACAATAAT

>648

ACGTATGCTGCTTTACATCATATAGCTGTTTCAGCTAGCTAATATAGATCTGCTTCAGTA  
TTTTATCAGCTGTATAATAATTTACTATGTGGATAGATTATTTCCATTTTTTGGTATTAC  
AATAATAATGTGGCAAT

>649

GTTTTCAGCTAGCTAATATAGATCTGCTTCAGTATTTATCAGCTGTATAATAATTTACTAT  
GTGGATAGATTATTTCCATTTTTTGGTATTACAATAATAATGTGGCAATGAACCCCTT  
ACATTATACATCTTTGC

>650

TTTTTGGTATTACAATAATAATGTGGCAATGAACCCCTTACATTATACATCTTTGCATTC  
TTGTTTGAGTGGGTTAGATAGTAGAATGGTTGCTGCTAGGTCAAAGGCTGTGTGCATTA  
ATTTTTTTTTTTTTTTTTT

>651

ATTACAATAATAATGTGGCAATGAACCCCTTACATTATACATCTTTGCATTCTTGTTTGA

GTGGGTTAGATAGTAGAATGGTTGCTGCTAGGTCAAAGGCTGTGTGCATTAATTTTTTTT  
TTTTTTTTTTTTTTGAGAT

>652

TAATAATGTGGCAATGAACCCCTTACATTATACATCTTGCATTCTTGTGAGTGGGTT  
AGATAGTAGAATGGTTGCTGCTAGGTCAAAGGCTGTGTGCATTAATTTTTTTTTTTTTTT  
TTTTTTGAGATGGAGTCT

>653

CTTACATTATACATCTTGCATTCTTGTGAGTGGGTTAGATAGTAGAATGGTTGCTGCT  
AGGTCAAAGGCTGTGTGCATTAATTTTTTTTTTTTTTTTTTTTTTTGAGATGGAGTCTCAC  
TCTGTTGCCAGGCTGGAGT

>654

AGATAGTAGAATGGTTGCTGCTAGGTCAAAGGCTGTGTGCATTAATTTTTTTTTTTTTTT  
TTTTTTGAGATGGAGTCTCACTCTGTTGCCAGGCTGGAGTGCAGTGGCTAATCCCGGC  
TCACTGCAACCTCCGCCTCCC

>655

TAGAATGGTTGCTGCTAGGTCAAAGGCTGTGTGCATTAATTTTTTTTTTTTTTTTTTTTT  
GAGATGGAGTCTCACTCTGTTGCCAGGCTGGAGTGCAGTGGCTAATCCCGGCTCACTG  
CAACCTCCGCCTCCCAGGTTCC

>656

GGCTGTGTGCATTAATTTTTTTTTTTTTTTTTTTTTTTGAGATGGAGTCTCACTCTGTTGCC  
AGGCTGGAGTGCAGTGGCTAATCCCGGCTCACTGCAACCTCCGCCTCCCAGGTTCAAG  
CGATTCTCCTGCCTCAGCCTC

>657

GGAGTCTCACTCTGTTGCCAGGCTGGAGTGCAGTGGCTAATCCCGGCTCACTGCAACC  
TCCGCCTCCCAGGTTCAAGCGATTCTCCTGCCTCAGCCTCCTCAGTAGCTGAGATTACA  
GGCATGTGCCACCACACCCGGCT

>658

CACTCTGTTGCCAGGCTGGAGTGCAGTGGCTAATCCCGGCTCACTGCAACCTCCGCCT  
CCCAGGTTCAAGCGATTCTCCTGCCTCAGCCTCCTCAGTAGCTGAGATTACAGGCATGT  
GCCACCACACCCGGCTAACTTTA

>659

TGGCTAATCCCGGCTCACTGCAACCTCCGCCTCCCAGGTTCAAGCGATTCTCCTGCCTC  
AGCCTCCTCAGTAGCTGAGATTACAGGCATGTGCCACCACACCCGGCTAACTTTAGTAT  
TTTTAGTAGAGACGGGGTTTCA

>660

CTAATCCCGGCTCACTGCAACCTCCGCCTCCCAGGTTCAAGCGATTCTCCTGCCTCAGC  
CTCCTCAGTAGCTGAGATTACAGGCATGTGCCACCACACCCGGCTAACTTTAGTATTTT  
TAGTAGAGACGGGGTTTACCA

>661

CACTGCAACCTCCGCCTCCCAGGTTCAAGCGATTCTCCTGCCTCAGCCTCCTCAGTAGC  
TGAGATTACAGGCATGTGCCACCACACCCGGCTAACTTTAGTATTTTTAGTAGAGACGG  
GGTTTACCATGTTGGCCAGGA

>662

GATTCTCCTGCCTCAGCCTCCTCAGTAGCTGAGATTACAGGCATGTGCCACCACACCCG  
GCTAACTTTAGTATTTTTAGTAGAGACGGGGTTTACCATGTTGGCCAGGATGGTCTTG  
ATCTCTTGACCTTGTGATCCAC

>663

TCAGCCTCCTCAGTAGCTGAGATTACAGGCATGTGCCACCACACCCGGCTAACTTTAGT  
ATTTTTAGTAGAGACGGGGTTTCACCATGTTGGCCAGGATGGTCTTGATCTCTTGACCT  
TGTGATCCACCTGCCTTGGCCT

>664

AGCCTCCTCAGTAGCTGAGATTACAGGCATGTGCCACCACACCCGGCTAACTTTAGTAT  
TTTTAGTAGAGACGGGGTTTCACCATGTTGGCCAGGATGGTCTTGATCTCTTGACCTTG  
TGATCCACCTGCCTTGGCCTCC

>665

AGGCATGTGCCACCACACCCGGCTAACTTTAGTATTTTTAGTAGAGACGGGGTTTCACC  
ATGTTGGCCAGGATGGTCTTGATCTCTTGACCTTGTGATCCACCTGCCTTGGCCTCCCA  
AAGTGCTGGGATTACAGGTGTG

>666

GTTTCACCATGTTGGCCAGGATGGTCTTGATCTCTTGACCTTGTGATCCACCTGCCTTG  
GCCTCCCAAAGTGCTGGGATTACAGGTGTGAGCTACCACGCCCGGCTTTTGAGAATAC  
TTTTTCAAAAAGAAAGAAACCAA

>667

GCCAGGATGGTCTTGATCTCTTGACCTTGTGATCCACCTGCCTTGGCCTCCCAAAGTGC  
TGGGATTACAGGTGTGAGCTACCACGCCCGGCTTTTGAGAATACTTTTTCAAAAAGAA  
AGAAACCAATATTGAGTACCTGT

>668

GTGATCCACCTGCCTTGGCCTCCCAAAGTGCTGGGATTACAGGTGTGAGCTACCACGC  
CCGGCTTTTGAGAATACTTTTTCAAAAAGAAAGAAACCAATATTGAGTACCTGTTGGG  
CCCTGTTTTGCTTTCACATCCATT

>669

GCCTCCCAAAGTGCTGGGATTACAGGTGTGAGCTACCACGCCCGGCTTTTGAGAATAC  
TTTTTCAAAAAGAAAGAAACCAATATTGAGTACCTGTTGGGCCCTGTTTTGCTTTCACA  
TCCATTCTTTCATATGGGTTTA

>670

CCCAAAGTGCTGGGATTACAGGTGTGAGCTACCACGCCCGGCTTTTGAGAATACTTTTT  
CAAAAAGAAAGAAACCAATATTGAGTACCTGTTGGGCCCTGTTTTGCTTTCACATCCAT  
TCTTTCATATGGGTTTATAAT

>671

CTTTCATATGGGTTTATAATACCACGTCACTCTTCTTAAAATTA AAACTCTCCTTTACCT  
TGCACTTAGAAGAAAATCCAAAATTTTGACTGTGGCTTAAAAGGTCTGCATGCTAG  
CCCTTACCTACATCCAGGATC

>672

TCACTATGGGTTTATAATACCACGTCACTCTTCTTAAAATTA AAACTCTCCTTTACCTTG  
CACTTAGAAGAAAATCCAAAATTTTGACTGTGGCTTAAAAGGTCTGCATGCTAGCC  
CTTACCTACATCCAGGATCTCA

>673

CTTAAAATTA AAACTCTCCTTTACCTTGCACTTAGAAGAAAATCCAAAATTTTGACTGT  
GGCTTAAAAGGTCTGCATGCTAGCCCTTACCTACATCCAGGATCTCATCTCTAACTA  
CTCTCCTCCATGCACAGTGCTC

>674

TCTCCTTTACCTTGCACTTAGAAGAAAATCCAAAATTTTGACTGTGGCTTAAAAGGTC

CTGCATGCTAGCCCTTACCTACATCCAGGATCTCATCTCTAACTACTCTCCTCCATGCAC  
AGTGCTCCCGGCTGTCCTGGC

>675

TTAGAAGAAAATCCAAAATTTGACTGTGGCTTAAAAAGGTCCTGCATGCTAGCCCTTA  
CCTACATCCAGGATCTCATCTCTAACTACTCTCCTCCATGCACAGTGCTCCCGGCTGTCC  
TGGCCTCCTTGTTCTTACTGG

>676

AAAAGGTCCTGCATGCTAGCCCTTACCTACATCCAGGATCTCATCTCTAACTACTCTCCT  
CCTATGCACAGTGCTCCCGGCTGTCCTGGCCTCCTTGTTCTTACTGGAATACATCAGTCT  
CTTTCCATTTATGACCTCTG

>677

CTAACTACTCTCCTCCATGCACAGTGCTCCCGGCTGTCCTGGCCTCCTTGTTCTTACTG  
GAATACATCAGTCTCTTTCCATTTATGACCTCTGTAGTTGGTTTTCTTGCAGCTTGGA  
TGGCCTCCTGAAGTCTTGGC

>678

TCCCGGCTGTCCTGGCCTCCTTGTTCTTACTGGAATACATCAGTCTCTTTCCATTTATG  
ACCTCTGTAGTTGGTTTTCTTGCAGCTTGGAATGGCCTTCTGAAGTCTTTGCCTGCTT  
AGCTCCTCCTCAGACTTTAGG

>679

CCTCCTTGTTCTTACTGGAATACATCAGTCTCTTTCCATTTATGACCTCTGTAGTTGGT  
TTTCTTGCAGCTTGGAATGGCCTTCTGAAGTCTTTGCCTGCTTAGCTCCTCCTCAGAC  
TTTAGGTCTTATGTCCAATA

>680

ACATCAGTCTCTTTCCATTTATGACCTCTGTAGTTGGTTTTCTTGCAGCTTGGAATGGC  
CTTCTGAAGTCTTTGCCTGCTTAGCTCCTCCTCAGACTTTAGGTCTTATGTCCAATAG  
TCCTGTCTGAAATTTACCC

>681

CATTTATGACCTCTGTAGTTGGTTTTCTTGCAGCTTGGAATGGCCTTCTGAAGTCTTT  
GCCTGCTTAGCTCCTCCTCAGACTTTAGGTCTTATGTCCAATAGTCTGTCTGAAATTT  
CACCTTTTCTCTCATCAC

>682

CTCTGTAGTTGGTTTTCTTGCAGCTTGGAATGGCCTTCTGAAGTCTTTGCCTGCTTAG  
CTCCTCCTCAGACTTTAGGTCTTATGTCCAATAGTCTGTCTGAAATTTACCCCTTTTC  
CTCTCATCACCTCAGTCTTA

>683

GTTGGTTTTCTTGCAGCTTGGAATGGCCTTCTGAAGTCTTTGCCTGCTTAGCTCCTCC  
TCAGACTTTAGGTCTTATGTCCAATAGTCTGTCTGAAATTTACCCCTTTTCTCTCAT  
CACCTTCAGTCTATCACTTC

>684

CTCAGACTTTAGGTCTTATGTCCAATAGTCTGTCTGAAATTTACCCCTTTTCTCTCA  
TCACCTTCAGTCTATCACTTCATTTTATTAATTGACTCTCCATCATCTGAAATTATTATA  
TTTATTTACTTTGTTAGT

>685

GTCCTATCACTTCATTTTATTAATTGACTCTCCATCATCTGAAATTATTATTTATTTACT  
TTGTTAGTTACTAGTCTCATTTATTAGGTAAGCTTTTTGAGGATAGACAACCTTGTCCAG  
CTTGTTACTCTACTGTA

>686

CACTTCATTTTATTAATTGTA CTCTCCATCATCTGAAATTATTATATTTACTTTGTTA  
GTTACTAGTCTCATTATTAGGTAAGCTTTTTGAGGATAGACAACCTTGCCAGCTTGTT  
ACTCTACTGTATTGCTAA

>687

ATCATCTGAAATTATTATATTTACTTTGTTAGTTACTAGTCTCATTATTAGGTAAGC  
TTTTTGAGGATAGACAACCTTGCCAGCTTGTTACTCTACTGTATTGCTAAGGTTTATGA  
CAGTGTCTGTATAGAGTA

>688

CTGAAATTATTATATTTACTTTGTTAGTTACTAGTCTCATTATTAGGTAAGCTTTTT  
GAGGATAGACAACCTTGCCAGCTTGTTACTCTACTGTATTGCTAAGGTTTATGACAGT  
GTCTGTATAGAGTAGTTCC

>689

TTTATTTACTTTGTTAGTTACTAGTCTCATTATTAGGTAAGCTTTTTGAGGATAGACAAC  
CTTGCCAGCTTGTTACTCTACTGTATTGCTAAGGTTTATGACAGTGTCTGTATAGAGTA  
GTTCCCTTAATGTTTATTG

>690

CTCATTATTAGGTAAGCTTTTTGAGGATAGACAACCTTGCCAGCTTGTTACTCTACTG  
TATTGCTAAGGTTTATGACAGTGTCTGTATAGAGTAGTTCCTTAATGTTTATTGATACGT  
GAATGGGTGAATGAATAGC

>691

TGAGGATAGACAACCTTGCCAGCTTGTTACTCTACTGTATTGCTAAGGTTTATGACAG  
TGCTGTATAGAGTAGTTCCTTAATGTTTATTGATACGTGAATGGGTGAATGAATAGCA  
GTCTCTACCAACAAGAGGAGG

>692

AGGATAGACAACCTTGCCAGCTTGTTACTCTACTGTATTGCTAAGGTTTATGACAGT  
TCTGTATAGAGTAGTTCCTTAATGTTTATTGATACGTGAATGGGTGAATGAATAGCAGT  
CTCTACCAACAAGAGGAGGAG

>693

GGTTTATGACAGTGTCTGTATAGAGTAGTTCCTTAATGTTTATTGATACGTGAATGGGT  
GAATGAATAGCAGTCTCTACCAACAAGAGGAGGAGTGGTTCTCAACGGGGCCTGAGA  
AATGGCTTTGGAAAAGGGTGCTG

>694

GTATAGAGTAGTTCCTTAATGTTTATTGATACGTGAATGGGTGAATGAATAGCAGTCTC  
TACCAACAAGAGGAGGAGTGGTTCTCAACGGGGCCTGAGAAATGGCTTTGGAAAAGG  
GTGCTGGGAGAAGATTAGAACTT

>695

ATAGAGTAGTTCCTTAATGTTTATTGATACGTGAATGGGTGAATGAATAGCAGTCTCTA  
CCAACAAGAGGAGGAGTGGTTCTCAACGGGGCCTGAGAAATGGCTTTGGAAAAGGGT  
GCTGGGAGAAGATTAGAACTTAG

>696

ATACGTGAATGGGTGAATGAATAGCAGTCTCTACCAACAAGAGGAGGAGTGGTTCTCA  
ACGGGGCCTGAGAAATGGCTTTGGAAAAGGGTGCTGGGAGAAGATTAGAACTTAGAG  
TGAGATCCTGACCTCTCTCCCTTG

>697

CTCTACCAACAAGAGGAGGAGTGGTTCTCAACGGGGCCTGAGAAATGGCTTTGGAAA

AGGGTGCTGGGAGAAGATTAGAACTTAGAGTGAGATCCTGACCTCTCTCCCCTTGCTT  
TGCAGGCCAGAGGCACCCAATGAGT

>698

TACCAACAAGAGGAGGAGTGGTTCTCAACGGGGCCTGAGAAATGGCTTTGGAAAAGG  
GTGCTGGGAGAAGATTAGAACTTAGAGTGAGATCCTGACCTCTCTCCCCTTGCTTTGC  
AGGCCAGAGGCACCCAATGAGTTCT

>699

GAGGAGTGGTTCTCAACGGGGCCTGAGAAATGGCTTTGGAAAAGGGTGCTGGGAGAA  
GATTAGAACTTAGAGTGAGATCCTGACCTCTCTCCCCTTGCTTTGCAGGCCAGAGGCA  
CCCAATGAGTTCTATGATGGAGACC

>700

AAAGGGTGCTGGGAGAAGATTAGAACTTAGAGTGAGATCCTGACCTCTCTCCCCTTGCT  
TTTGCAGGCCAGAGGCACCCAATGAGTTCTATGATGGAGACCATGACAATGACAAGGA  
AAGCGATGTGGAGATTTAAGAGTG

>701

AGGGTGCTGGGAGAAGATTAGAACTTAGAGTGAGATCCTGACCTCTCTCCCCTTGCTT  
TGCAGGCCAGAGGCACCCAATGAGTTCTATGATGGAGACCATGACAATGACAAGGAA  
AGCGATGTGGAGATTTAAGAGTGGC

>702

GAAGATTAGAACTTAGAGTGAGATCCTGACCTCTCTCCCCTTGCTTTGCAGGCCAGAG  
GCACCCAATGAGTTCTATGATGGAGACCATGACAATGACAAGGAAAGCGATGTGGAGA  
TTTAAGAGTGGCTTGGGATGCTGT

>703

CTCTCTCCCCTTGCTTTGCAGGCCAGAGGCACCCAATGAGTTCTATGATGGAGACCATG  
ACAATGACAAGGAAAGCGATGTGGAGATTTAAGAGTGGCTTGGGATGCTGTGTCCCAA  
GGAATTTCTTTTACCTCTTGGT

>704

TTGCAGGCCAGAGGCACCCAATGAGTTCTATGATGGAGACCATGACAATGACAAGGAA  
AGCGATGTGGAGATTTAAGAGTGGCTTGGGATGCTGTGTCCCAAGGAATTTCTTTTAC  
CTTTGGTTGGGCTGGAGGGAAA

>705

CCAGAGGCACCCAATGAGTTCTATGATGGAGACCATGACAATGACAAGGAAAGCGATG  
TGGAGATTTAAGAGTGGCTTGGGATGCTGTGTCCCAAGGAATTTCTTTTACCTCTTGG  
TTGGGCTGGAGGGAAAAGGAGTG

>706

TGGAGACCATGACAATGACAAGGAAAGCGATGTGGAGATTTAAGAGTGGCTTGGGAT  
GCTGTGTCCCAAGGAATTTCTTTTACCTCTTGGTTGGGCTGGAGGGAAAAGGAGTGG  
CTCCTAGAGTCCTGGGGGTCACCCC

>707

TGGAGATTTAAGAGTGGCTTGGGATGCTGTGTCCCAAGGAATTTCTTTTACCTCTTGG  
TTGGGCTGGAGGGAAAAGGAGTGGCTCCTAGAGTCCTGGGGGTCACCCCAGGGCTTT  
TGCTGACTCTGGGAAAAGAGTCTGG

>708

TTAAGAGTGGCTTGGGATGCTGTGTCCCAAGGAATTTCTTTTACCTCTTGGTTGGGCT  
GGAGGGAAAAGGAGTGGCTCCTAGAGTCCTGGGGGTCACCCCAGGGCTTTTGCTGAC  
TCTGGGAAAAGAGTCTGGAGACCAC



>709

GGGATGCTGTGCCCAAGGAATTTCTTTTCACCTCTTGGTTGGGCTGGAGGGAAAAGG  
AGTGGCTCCTAGAGTCTGGGGGTCACCCCAGGGCTTTTGCTGACTCTGGGAAAGAGT  
CTGGAGACCACATTTGGTTCTCGA

>710

GCTGGAGGGAAAAGGAGTGGCTCCTAGAGTCTGGGGGTCACCCCAGGGCTTTTGCT  
GACTCTGGGAAAGAGTCTGGAGACCACATTTGGTTCTCGAACCATCTACCTGCTTTTCC  
TCTCTCTCCAAGGCCTGACAATG

>711

TGGAGGGAAAAGGAGTGGCTCCTAGAGTCTGGGGGTCACCCCAGGGCTTTTGCTGA  
CTCTGGGAAAGAGTCTGGAGACCACATTTGGTTCTCGAACCATCTACCTGCTTTTCTC  
TCTCTCCAAGGCCTGACAATGGT

>712

CTCTGGGAAAGAGTCTGGAGACCACATTTGGTTCTCGAACCATCTACCTGCTTTTCTC  
TCTCTCCAAGGCCTGACAATGGTACCTATTAGGGATGAGATACAGACAAGGATAGCTA  
TCTGGGACATTATTGGCAGTGG

>713

CACATTTGGTTCTCGAACCATCTACCTGCTTTTCTCTCTCTCCAAGGCCTGACAATG  
GTACCTATTAGGGATGAGATACAGACAAGGATAGCTATCTGGGACATTATTGGCAGTGG  
GCCCTGGAGGCCAGTCCCTAGC

>714

CGAACCATCTACCTGCTTTTCTCTCTCTCCAAGGCCTGACAATGGTACCTATTAGGG  
ATGAGATACAGACAAGGATAGCTATCTGGGACATTATTGGCAGTGGGCCCTGGAGGCC  
AGTCCCTAGCCCCCTTGCCCCCT

>715

AAGGCCTGACAATGGTACCTATTAGGGATGAGATACAGACAAGGATAGCTATCTGGGA  
CATTATTGGCAGTGGGCCCTGGAGGCCAGTCCCTAGCCCCCTTGCCCCCTATTCTTC  
CCTGCTTCCCTCGAACCCAGAGA

>716

TGGTACCTATTAGGGATGAGATACAGACAAGGATAGCTATCTGGGACATTATTGGCAGT  
GGGCCCTGGAGGCCAGTCCCTAGCCCCCTTGCCCCCTATTCTTCCCTGCTTCCCTCG  
AACCCAGAGATTTTGGAGGGAT

>717

CAGTGGGCCCTGGAGGCCAGTCCCTAGCCCCCTTGCCCCCTATTCTTCCCTGCTTCC  
CTCGAACCCAGAGATTTTGGAGGGATGAACGGGTAGACAAGGACTGAGATTGCCTCTG  
ACTTCTCTCCCCTGGGTTCTG

>718

GTGGGCCCTGGAGGCCAGTCCCTAGCCCCCTTGCCCCCTATTCTTCCCTGCTTCCCT  
CGAACCCAGAGATTTTGGAGGGATGAACGGGTAGACAAGGACTGAGATTGCCTCTGAC  
TTCCTCTCCCCTGGGTTCTGAC

>719

CCCTTGCCCCCTATTCTTCCCTGCTTCCCTCGAACCCAGAGATTTTGGAGGGATGAAC  
GGGTAGACAAGGACTGAGATTGCCTCTGACTTCTCTCCCCTGGGTTCTGACTTCTTC  
CTCCCCTTGCTTCCAGGGAAGA

>720

CCCTATTCTTCCCTGCTTCCCTCGAACCCAGAGATTTTGGAGGGATGAACGGGTAGA

CAAGGACTGAGATTGCCTCTGACTTCCTCCTCCCCTGGGTTCTGACTTCTTCTCCCCT  
TGCTTCCAGGGAAGATGAAGAG

>721

GGACTGAGATTGCCTCTGACTTCCTCCTCCCCTGGGTTCTGACTTCTTCTCCCCTTGC  
TTCCAGGGAAGATGAAGAGAGAGAGATTTGGAAGGGGCTCTGGCTCCCTAACACCTG  
AATCCCAGATGATGGGAAGTATGT

>722

AGATTGCCTCTGACTTCCTCCTCCCCTGGGTTCTGACTTCTTCTCCCCTTGCTTCCAG  
GGAAGATGAAGAGAGAGAGATTTGGAAGGGGCTCTGGCTCCCTAACACCTGAATCCC  
AGATGATGGGAAGTATGTTTTCAA

>723

CCTCTGACTTCCTCCTCCCCTGGGTTCTGACTTCTTCTCCCCTTGCTTCCAGGGAAGA  
TGAAGAGAGAGAGATTTGGAAGGGGCTCTGGCTCCCTAACACCTGAATCCCAGATGAT  
GGGAAGTATGTTTTCAAGTGTGG

>724

CTTGCTTCCAGGGAAGATGAAGAGAGAGAGATTTGGAAGGGGCTCTGGCTCCCTAAC  
ACCTGAATCCCAGATGATGGGAAGTATGTTTTCAAGTGTGGGGAGGATATGAAAATGTT  
CTGTTCTCACTTTTGGCTTTATGT

>725

GGAAGATGAAGAGAGAGAGATTTGGAAGGGGCTCTGGCTCCCTAACACCTGAATCCC  
AGATGATGGGAAGTATGTTTTCAAGTGTGGGGAGGATATGAAAATGTTCTGTTCTCACT  
TTTGGCTTTATGTCCATTTTACCA

>726

GAGAGAGATTTGGAAGGGGCTCTGGCTCCCTAACACCTGAATCCCAGATGATGGGAAG  
TATGTTTTCAAGTGTGGGGAGGATATGAAAATGTTCTGTTCTCACTTTTGGCTTTATGTC  
CATTTTACCACTGTTTTTATCC

>727

GGTAAAATCCCAGCTCAGGTGTTATATCCTTGCTGCTTCTGACAAATGAAACCAAGGTG  
TATTAATTAAGGTAATGCTAGCTACTACAATAAGCTGAAAAATATATAATAGCTAAAAGC  
TAGGGTGCCAGATTTAGGAAA

>728

CAGCTCAGGTGTTATATCCTTGCTGCTTCTGACAAATGAAACCAAGGTGATTAATTA  
GGTAATGCTAGCTACTACAATAAGCTGAAAAATATATAATAGCTAAAAGCTAGGGTGCC  
AGATTTAGGAAAATAAAAACAA

>729

ACAAATGAAACCAAGGTGTATTAATTAAGGTAATGCTAGCTACTACAATAAGCTGAAAA  
ATATATAATAGCTAAAAGCTAGGGTGCCAGATTTAGGAAAATAAAAACAAACAAAAAA  
CAATTGAAATTTGAATTCAGAT

>730

AAACCAAGGTGTATTAATTAAGGTAATGCTAGCTACTACAATAAGCTGAAAAATATATA  
TAGCTAAAAGCTAGGGTGCCAGATTTAGGAAAATAAAAACAAACAAAAACAATTGA  
AATTTGAATTCAGATAAACAAT

>731

CAAGGTGTATTAATTAAGGTAATGCTAGCTACTACAATAAGCTGAAAAATATATAATAGC  
TAAAAGCTAGGGTGCCAGATTTAGGAAAATAAAAACAAACAAAAACAATTGAAATTT  
GAATTCAGATAAACAATTTTT

>732

TAAGGTAATGCTAGCTACTACAATAAGCTGAAAAATATAATAGCTAAAAGCTAGGGT  
GCCAGATTTAGGAAAATAAAAAACAAACAAAAACAATTGAAATTTGAATTCAGATAA  
ACAATTTTTTTAGTATAATTATG

>733

AGCTAAAAGCTAGGGTGCCAGATTTAGGAAAATAAAAAACAAACAAAAACAATTGAA  
ATTTGAATTCAGATAAAACAATTTTTTTAGTATAATTATGTCCCATGCAATATTTGAGACA  
TACTAAAAGGTTATTCATTGTT

>734

CCAGATTTAGGAAAATAAAAAACAAACAAAAACAATTGAAATTTGAATTCAGATAAA  
CAATTTTTTTAGTATAATTATGTCCCATGCAATATTTGAGACATACTAAAAGGTTATTCAT  
TGTTTATCTGATATTCAAATT

>735

AAAACAATTGAAATTTGAATTCAGATAAAACAATTTTTTTAGTATAATTATGTCCCATGC  
AATATTTGAGACATACTAAAAGGTTATTCATTGTTTATCTGATATTCAAATTTAACATTTT  
CATTAAATTTATTTTATTG

>736

ATTTGAATTCAGATAAAACAATTTTTTTAGTATAATTATGTCCCATGCAATATTTGAGACA  
TACTAAAAGGTTATTCATTGTTTATCTGATATTCAAATTTAACATTTTCATTAAATTTATTT  
ATTTGGCAGCCCTATGG

>737

ACTAAAAGGTTATTCATTGTTTATCTGATATTCAAATTTAACATTTTCATTAAATTTATTTTA  
TTTGGCAGCCCTATGGAAGACATCAAAGTTTATTTCTTATTTATATAAAGTCCAAAATA  
GATGTTTTTTAGTAGGCA

>738

ATTCATTGTTTATCTGATATTCAAATTTAACATTTTCATTAAATTTATTTATTTGGCAGCCC  
TATGGAAGACATCAAAGTTTATTTCTTATTTATATAAAGTCCAAAATAGATGTTTTTTAG  
TAGGCAGGCAGCTCTC

>739

TATCTGATATTCAAATTTAACATTTTCATTAAATTTATTTATTTGGCAGCCCTATGGAAGA  
CATCAAAGTTTATTTCTTATTTATATAAAGTCCAAAATAGATGTTTTTTAGTAGGCAGG  
CAGCTCTTCTAAGCGTA

>740

TTTATTTTATTTGGCAGCCCTATGGAAGACATCAAAGTTTATTTCTTATTTATATAAAGT  
CCAAAATAGATGTTTTTTAGTAGGCAGGCAGCTCTTCTAAGCGTAATTCAGGGCTCT  
GGGTTCTGTCCATCCTGGCC

>741

TGGCAGCCCTATGGAAGACATCAAAGTTTATTTCTTATTTATATAAAGTCCAAAATAGA  
TGTTTTTTAGTAGGCAGGCAGCTCTTCTAAGCGTAATTCAGGGCTCTGGGTTCTGTCTC  
CATCCTGGCCCTGACGTCTTT

>742

CAGCCCTATGGAAGACATCAAAGTTTATTTCTTATTTATATAAAGTCCAAAATAGATGT  
TTTTTAGTAGGCAGGCAGCTCTTCTAAGCGTAATTCAGGGCTCTGGGTTCTGTCCAT  
CCTGGCCCTGACGTCTTTT

>743

AAAGTTTATTTCTTATTTATATAAAGTCCAAAATAGATGTTTTTTAGTAGGCAGGCAGCT

CTTCTCTAAGCGTAATTCAGGGCTCTGGGTTCTGTCCATCCTGGCCCTGACGTCTTTCAT  
TGCTCAGCTTCTAAGATAGC

>744

GCTCTTCTCTAAGCGTAATTCAGGGCTCTGGGTTCTGTCCATCCTGGCCCTGACGTCTT  
TCATTGCTCAGCTTCTAAGATAGCTCTATGCTCATGGGGTCAAGTCACAGGAAAGAAA  
AGGGAATGTGGAGTTCCACTTGG

>745

CTAAGCGTAATTCAGGGCTCTGGGTTCTGTCCATCCTGGCCCTGACGTCTTTCATTGCT  
CAGCTTCTAAGATAGCTCTATGCTCATGGGGTCAAGTCACAGGAAAGAAAAGGGAATG  
TGGAGTTCCACTTGGGAGTTTTT

>746

TCTGTCCATCCTGGCCCTGACGTCTTTCATTGCTCAGCTTCTAAGATAGCTCTATGCTCA  
TGGGGTCAAGTCACAGGAAAGAAAAGGGAATGTGGAGTTCCACTTGGGAGTTTTTAT  
GGGCCAGTCTGGAAGCGGCACA

>747

CATCCTGGCCCTGACGTCTTTCATTGCTCAGCTTCTAAGATAGCTCTATGCTCATGGGGT  
CAAGTCACAGGAAAGAAAAGGGAATGTGGAGTTCCACTTGGGAGTTTTTATGGGCCA  
GTCCTGGAAGCGGCACAGAGGAT

>748

CTGACGTCTTTCATTGCTCAGCTTCTAAGATAGCTCTATGCTCATGGGGTCAAGTCACA  
GGAAAGAAAAGGGAATGTGGAGTTCCACTTGGGAGTTTTTATGGGCCAGTCTGGAA  
GCGGCACAGAGGATTTCTGCTCAC

>749

CTAAGATAGCTCTATGCTCATGGGGTCAAGTCACAGGAAAGAAAAGGGAATGTGGAGT  
TCCACTTGGGAGTTTTTATGGGCCAGTCTGGAAGCGGCACAGAGGATTTCTGCTCAC  
AATCTATTGGCCAGAACTCAATCA

>750

GGTCAAGTCACAGGAAAGAAAAGGGAATGTGGAGTTCCACTTGGGAGTTTTTATGGG  
CCAGTCTGGAAGCGGCACAGAGGATTTCTGCTCACAATCTATTGGCCAGAACTCAAT  
CACATGGCCTGCACCTAACTGCAAG

>751

CACAGGAAAGAAAAGGGAATGTGGAGTTCCACTTGGGAGTTTTTATGGGCCAGTCTG  
GAAGCGGCACAGAGGATTTCTGCTCACAATCTATTGGCCAGAACTCAATCACATGGCC  
TGCACCTAACTGCAAGTTAAGCCA

>752

CACTTGGGAGTTTTTATGGGCCAGTCTGGAAGCGGCACAGAGGATTTCTGCTCACAA  
TCTATTGGCCAGAACTCAATCACATGGCCTGCACCTAACTGCAAGTTAAGCCAGAAAA  
ATGTAGGTGTGCCAGGAAGAAGT

>753

CGGCACAGAGGATTTCTGCTCACAATCTATTGGCCAGAACTCAATCACATGGCCTGCAC  
CTAACTGCAAGTTAAGCCAGAAAAATGTAGGTGTGCCAGGAAGAAGTTTGGGGAAC  
AGCTAGCCAGTCTCTGCCACACCT

>754

CAGAGGATTTCTGCTCACAATCTATTGGCCAGAACTCAATCACATGGCCTGCACCTAAC  
TGCAAGTTAAGCCAGAAAAATGTAGGTGTGCCAGGAAGAAGTTTGGGGAACAGCTA  
GCCAGTCTCTGCCACACCTGGTAA

>755

TTGGCCAGAACTCAATCACATGGCCTGCACCTAACTGCAAGTTAAGCCAGAAAAATGT  
AGGTGTGCCAGGAAGAAGTTTGGGGAACAGCTAGCCAGTCTCTGCCACACCTGGTA  
ACAGCAGAGTGAATCTGTCAGTACT

>756

ATGGCCTGCACCTAACTGCAAGTTAAGCCAGAAAAATGTAGGTGTGCCAGGAAGAA  
GTTTGGGGAACAGCTAGCCAGTCTCTGCCACACCTGGTAACAGCAGAGTGAATCTGTC  
AGTACTCGTGCCTAATGCGTGTCTC

>757

CCTGCACCTAACTGCAAGTTAAGCCAGAAAAATGTAGGTGTGCCAGGAAGAAGTTTG  
GGGAACAGCTAGCCAGTCTCTGCCACACCTGGTAACAGCAGAGTGAATCTGTCAGTAC  
TCGTGCCTAATGCGTGTCTCATAT

>758

GAAAAATGTAGGTGTGCCAGGAAGAAGTTTGGGGAACAGCTAGCCAGTCTCTGCCA  
CACCTGGTAACAGCAGAGTGAATCTGTCAGTACTCGTGCCTAATGCGTGTCTCATATGC  
TAGTGCTGGATTCAGTCAGCAGTC

>759

CCAGGAAGAAGTTTGGGGAACAGCTAGCCAGTCTCTGCCACACCTGGTAACAGCAGA  
GTGAATCTGTCAGTACTCGTGCCTAATGCGTGTCTCATATGCTAGTGCTGGATTCAGTCA  
GCAGTCCTACATCCGCTGGGGTC

>760

CTCTGCCACACCTGGTAACAGCAGAGTGAATCTGTCAGTACTCGTGCCTAATGCGTGT  
TCATATGCTAGTGCTGGATTCAGTCAGCAGTCCTACATCCGCTGGGGTCCCTAGGAGGG  
GTCAGATGCTCTCCTCTTTGCC

>761

TGGTAACAGCAGAGTGAATCTGTCAGTACTCGTGCCTAATGCGTGTCTCATATGCTAGT  
GCTGGATTCAGTCAGCAGTCCTACATCCGCTGGGGTCCCTAGGAGGGGTCAGATGCTC  
TCCTCTTTGCCCTGAACTGGTTA

>762

GTGCCTAATGCGTGTCTCATATGCTAGTGCTGGATTCAGTCAGCAGTCCTACATCCGCT  
GGGGTCCCTAGGAGGGGTCAGATGCTCTCCTCTTTGCCCTGAACTGGTTAGCTACTTCG  
GACTGGGATGACAAGGCCATTG

>763

CCTAATGCGTGTCTCATATGCTAGTGCTGGATTCAGTCAGCAGTCCTACATCCGCTGGG  
GTCCTAGGAGGGGTCAGATGCTCTCCTCTTTGCCCTGAACTGGTTAGCTACTTCGGAC  
TGGGATGACAAGGCCATTGTGA

>764

CAGCAGTCCTACATCCGCTGGGGTCCCTAGGAGGGGTCAGATGCTCTCCTCTTTGCCCT  
GAACTGGTTAGCTACTTCGGACTGGGATGACAAGGCCATTGTGAGAGTGATAAGCAAT  
GTGATTCAAACAAATTCATTCA

>765

TCCCTAGGAGGGGTCAGATGCTCTCCTCTTTGCCCTGAACTGGTTAGCTACTTCGGACT  
GGGATGACAAGGCCATTGTGAGAGTGATAAGCAATGTGATTCAAACAAATTCATTCA  
CTTCAATTCAATGCAGGTTTTTT

>766

GGTCAGATGCTCTCCTCTTTGCCCTGAACTGGTTAGCTACTTCGGACTGGGATGACAAG

GCCATTGTGAGAGTGATAAGCAATGTGATTCAAACAAATTCATTTCACTTCAATTCAAT  
GCAGGTTTTTTTTTTTTTTTTGA

>767

TGACAAGGCCATTGTGAGAGTGATAAGCAATGTGATTCAAACAAATTCATTTCACTTCA  
ATTCAATGCAGGTTTTTTTTTTTTTTTTGAGACGGGCTGTCATGCTGTTGCCAACCTGG  
AGAGCAGTGGCGCCATTACGGC

>768

GTGATAAGCAATGTGATTCAAACAAATTCATTTCACTTCAATTCAATGCAGGTTTTTTTT  
TTTTTTTGAGACGGGCTGTCATGCTGTTGCCAACCTGGAGAGCAGTGGCGCCATTAC  
GGCTCACTGCAGCCTCCTGGGC

>769

TTCATTTCAATTCAATGCAGGTTTTTTTTTTTTTTTTGAGACGGGCTGTCATGCTGTTGCC  
AACCTGGAGAGCAGTGGCGCCATTACGGCTCACTGCAGCCTCCTGGGCTCAAGCAAT  
TCTCCCTCCTCAGCTTCCAAG

>770

CACTTCAATTCAATGCAGGTTTTTTTTTTTTTTTTGAGACGGGCTGTCATGCTGTTGCCAA  
CCCTGGAGAGCAGTGGCGCCATTACGGCTCACTGCAGCCTCCTGGGCTCAAGCAATTC  
TCCCTCCTCAGCTTCCAAGTA

>771

TTTTTTTGAGACGGGCTGTCATGCTGTTGCCAACCTGGAGAGCAGTGGCGCCATTAC  
GGCTCACTGCAGCCTCCTGGGCTCAAGCAATTCTCCCTCCTCAGCTTCCAAGTAGCT  
GGGACTACAGGTGCATGCCACCAT

>772

CTGTCATGCTGTTGCCAACCTGGAGAGCAGTGGCGCCATTACGGCTCACTGCAGCCT  
CCTGGGCTCAAGCAATTCTCCCTCCTCAGCTTCCAAGTAGCTGGGACTACAGGTGCA  
TGCCACCATGTTTCACTCATTAT

>773

ACCCTGGAGAGCAGTGGCGCCATTACGGCTCACTGCAGCCTCCTGGGCTCAAGCAATT  
CTCCCTCCTCAGCTTCCAAGTAGCTGGGACTACAGGTGCATGCCACCATGTTTCACTC  
ATTTATTTTTATTTTTTTGTAG

>774

AGCAGTGGCGCCATTACGGCTCACTGCAGCCTCCTGGGCTCAAGCAATTCTCCCTCCT  
CAGCTTCCAAGTAGCTGGGACTACAGGTGCATGCCACCATGTTTCACTCATTATTTTT  
TTATTTTTTTGTAGACAGGAGGT

>775

ACGGCTCACTGCAGCCTCCTGGGCTCAAGCAATTCTCCCTCCTCAGCTTCCAAGTAG  
CTGGGACTACAGGTGCATGCCACCATGTTTCACTCATTATTTTTTTATTTTTTTGTAGAC  
AGGAGGTCTCACTATGTTACCC

>776

GGGCTCAAGCAATTCTCCCTCCTCAGCTTCCAAGTAGCTGGGACTACAGGTGCATGC  
CACCATGTTTCACTCATTATTTTTTTATTTTTTTGTAGACAGGAGGTCTCACTATGTTACC  
CAGGCTGCTGTCCAAGTCTG

>777

CTTCCAAGTAGCTGGGACTACAGGTGCATGCCACCATGTTTCACTCATTATTTTTTTAT  
TTTTTTGTAGACAGGAGGTCTCACTATGTTACCCAGGCTGCTGTCCAAGTCTGGGCTC  
ACGTGATTCTCCCGCCTCAGC

>778

CCAAGTAGCTGGGACTACAGGTGCATGCCACCATGTTTCAGCTCATTATTTTTTATTTTT  
TTGTAGACAGGAGGTCTCACTATGTTACCCAGGCTGCTGTCCAAGTCCTGGGCTCACG  
TGATTCTCCCGCCTCAGCCTCC

>779

GCATGCCACCATGTTTCAGCTCATTATTTTTTATTTTTTTGTAGACAGGAGGTCTCACTAT  
GTTACCCAGGCTGCTGTCCAAGTCCTGGGCTCACGTGATTCTCCCGCCTCAGCCTCCCA  
AAATGCTGGGATTACAGGCG

>780

GACAGGAGGTCTCACTATGTTACCCAGGCTGCTGTCCAAGTCCTGGGCTCACGTGATT  
CTCCCGCCTCAGCCTCCCAAATGCTGGGATTACAGGCGTAAGCCACCATGCCAGAC  
AATTTAATAAATATTTATTAATAAAC

>781

CAGGCTGCTGTCCAAGTCCTGGGCTCACGTGATTCTCCCGCCTCAGCCTCCCAAATG  
CTGGGATTACAGGCGTAAGCCACCATGCCAGACAATTTAATAAATATTTATTAATAACTT  
CTAGGATATTGAGAAAAGCTTG

>782

GGGCTCACGTGATTCTCCCGCCTCAGCCTCCCAAATGCTGGGATTACAGGCGTAAGC  
CACCATGCCAGACAATTTAATAAATATTTATTAATAACTTCTAGGATATTGAGAAAAGCT  
TGGTTCTAGGCCACTGGGGAAG

>783

AAAATGCTGGGATTACAGGCGTAAGCCACCATGCCAGACAATTTAATAAATATTTATTA  
AAACTTCTAGGATATTGAGAAAAGCTTGGTTCTAGGCCACTGGGGAAGACATCAACTG  
AAACAGCCCAGTTATACTCTCA

>784

GGATTACAGGCGTAAGCCACCATGCCAGACAATTTAATAAATATTTATTAATAACTTCTA  
GGATATTGAGAAAAGCTTGGTTCTAGGCCACTGGGGAAGACATCAACTGAAACAGCCC  
AGTTATACTCTCAATTAGCTGT

>785

CCACCATGCCAGACAATTTAATAAATATTTATTAATAACTTCTAGGATATTGAGAAAAGC  
TTGGTTCTAGGCCACTGGGGAAGACATCAACTGAAACAGCCCAGTTATACTCTCAATTA  
GCTGTATAACAATTAATTCAC

>786

ACAATTTAATAAATATTTATTAATAACTTCTAGGATATTGAGAAAAGCTTGGTTCTAGGCC  
ACTGGGGAAGACATCAACTGAAACAGCCCAGTTATACTCTCAATTAGCTGTATACAATT  
AAATTCACAGATATCCTCAAC

>787

TTATTAATAACTTCTAGGATATTGAGAAAAGCTTGGTTCTAGGCCACTGGGGAAGACATC  
AACTGAAACAGCCCAGTTATACTCTCAATTAGCTGTATAACAATTAATTCACAGATATCC  
TCAACCCCTTATCCATATCCCA

>788

CACTGGGGAAGACATCAACTGAAACAGCCCAGTTATACTCTCAATTAGCTGTATACAAT  
TAAATTCACAGATATCCTCAACCCCTTATCCATATCCCATTATCTTTCAAAGGTTGGTGA  
AAACCTCATAGCACAAGAAT

>789

CAATTAGCTGTATAACAATTAATTCACAGATATCCTCAACCCCTTATCCATATCCCATTAT

CTTCAAAGGTTGGTGAAAACCTCATAGCACAAAGAATTCTGCCCTAAATGTTGAATA  
CAGAATGGTCCCCTCTCTCC

>790

AAATTCACAGATATCCTCAACCCTTATCCATATCCCATTTCATCTTTCAAAGGTTGGTGAA  
AACCTCATAGCACAAAGAATTCTGCCCTAAATGTTGAATACAGAATGGTCCCCTCTCT  
CCCTAATTCCTAAAATATTTG

>791

CAGATATCCTCAACCCTTATCCATATCCCATTTCATCTTTCAAAGGTTGGTGAAAACCTCA  
TAGCACAAAGAATTCTGCCCTAAATGTTGAATACAGAATGGTCCCCTCTCTCCCTAAT  
TCCTAAAATATTTGGTCTCTA

>792

CCATTTCATCTTTCAAAGGTTGGTGAAAACCTCATAGCACAAAGAATTCTGCCCTAAATG  
TTTGAATACAGAATGGTCCCCTCTCTCCCTAATTCCTAAAATATTTGGTCTCTATGTTTCAT  
TCATTTCATTCATGCATGCAT

>793

CCTCTCTCCCTAATTCCTAAAATATTTGGTCTCTATGTTTCATTTCATTTCATTCATGCATGCAT  
GCTTTTCAGTTAGTTTCATCGACAAACATTTACATCTACTCTGTTTGACAGTGTGCTAGGCT  
CTGGGGCTTGGGAGTGGA

>794

TCTCCCTAATTCCTAAAATATTTGGTCTCTATGTTTCATTTCATTTCATTCATGCATGCATGCTT  
TCAGTTAGTTTCATCGACAAACATTTACATCTACTCTGTTTGACAGTGTGCTAGGCTCTG  
GGGCTTGGGAGTGGAATA

>795

TTCATTTCATTCATGCATGCATGCTTTTCAGTTAGTTTCATCGACAAACATTTACATCTACTCT  
GTTTGACAGTGTGCTAGGCTCTGGGGCTTGGGAGTGGAATACTAAATTGAACAAGAC  
TGAGGCCTTGCCTTCCAGAAA

>796

TCAGTTAGTTTCATCGACAAACATTTACATCTACTCTGTTTGACAGTGTGCTAGGCTCTG  
GGGCTTGGGAGTGGAATACTAAATTGAACAAGACTGAGGCCTTGCCTTCCAGAAACT  
CACAAAGGAGTGGGTGGTCAGAA

>797

TTTACATCTACTCTGTTTGACAGTGTGCTAGGCTCTGGGGCTTGGGAGTGGAATACTA  
AATTGAACAAGACTGAGGCCTTGCCTTCCAGAAACTCACAAAGGAGTGGGTGGTCAG  
AATGCACATGACTCAGTCAGATAT

>798

CAGTGTGCTAGGCTCTGGGGCTTGGGAGTGGAATACTAAATTGAACAAGACTGAGGC  
CTTGCCTTCCAGAAACTCACAAAGGAGTGGGTGGTCAGAATGCACATGACTCAGTCA  
GATATAAGGCAGATGGTGGTAAATA

>799

CTCTGGGGCTTGGGAGTGGAATACTAAATTGAACAAGACTGAGGCCTTGCCTTCCAG  
AAACTCACAAAGGAGTGGGTGGTCAGAATGCACATGACTCAGTCAGATATAAGGCAG  
TGGTGGTAAATACTATGATAAATG

>800

TGGGGCTTGGGAGTGGAATACTAAATTGAACAAGACTGAGGCCTTGCCTTCCAGAAA  
CTCACAAAGGAGTGGGTGGTCAGAATGCACATGACTCAGTCAGATATAAGGCAGATGG  
TGGTAAATACTATGATAAATGTTT



>801

AGTGGAATACTAAATTGAACAAGACTGAGGCCTTGCCTTCCAGAACTCACAAAGG  
AGTGGGTGGTCAGAATGCACATGACTCAGTCAGATATAAGGCAGATGGTGGTAAATACT  
ATGATAAATGTTTCAGATAGTGCTA

>802

GAGGCCTTGCCTTCCAGAACTCACAAAGGAGTGGGTGGTCAGAATGCACATGACTC  
AGTCAGATATAAGGCAGATGGTGGTAAATACTATGATAAATGTTTCAGATAGTGCTAAGG  
GGCTTATGGAGAATGGGAGAAATT

>803

GGTGGTCAGAATGCACATGACTCAGTCAGATATAAGGCAGATGGTGGTAAATACTATGA  
TAAATGTTTCAGATAGTGCTAAGGGGCTTATGGAGAATGGGAGAAATTAATCTGACTCA  
AGGGTGGGTGGAGAAGATTACA

>804

GTCAGAATGCACATGACTCAGTCAGATATAAGGCAGATGGTGGTAAATACTATGATAAA  
TGTTTCAGATAGTGCTAAGGGGCTTATGGAGAATGGGAGAAATTAATCTGACTCAAGG  
GTGGGTGGAGAAGATTACATCCA

>805

ATAAGGCAGATGGTGGTAAATACTATGATAAATGTTTCAGATAGTGCTAAGGGGCTTATG  
GAGAATGGGAGAAATTAATCTGACTCAAGGGTGGGTGGAGAAGATTACATCCAAGAT  
CCAGCAATGACTTCCAGAAGAGA

>806

ATACTATGATAAATGTTTCAGATAGTGCTAAGGGGCTTATGGAGAATGGGAGAAATTA  
TCTGACTCAAGGGTGGGTGGAGAAGATTACATCCAAGATCCAGCAATGACTTCCAGAA  
GAGACAAATGAACCTGGCCTGGC

>807

AATGTTTCAGATAGTGCTAAGGGGCTTATGGAGAATGGGAGAAATTAATCTGACTCAA  
GGGTGGGTGGAGAAGATTACATCCAAGATCCAGCAATGACTTCCAGAAGAGACAAAT  
GAACCTGGCCTGGCAAGGGAGGCAG

>808

CTAAGGGGCTTATGGAGAATGGGAGAAATTAATCTGACTCAAGGGTGGGTGGAGAA  
GATTACATCCAAGATCCAGCAATGACTTCCAGAAGAGACAAATGAACCTGGCCTGGCA  
AGGGAGGCAGAGTCAAAGTGTCTGG

>809

GAGAAATTAATCTGACTCAAGGGTGGGTGGAGAAGATTACATCCAAGATCCAGCAAT  
GACTTCCAGAAGAGACAAATGAACCTGGCCTGGCAAGGGAGGCAGAGTCAAAGTGTCT  
TGGCTCAAAGCCCACCACAGCCTTG

>810

GAAATTAATCTGACTCAAGGGTGGGTGGAGAAGATTACATCCAAGATCCAGCAATGA  
CTTCCAGAAGAGACAAATGAACCTGGCCTGGCAAGGGAGGCAGAGTCAAAGTGTCTG  
GCTCAAAGCCCACCACAGCCTTGGC

>811

GGGTGGAGAAGATTACATCCAAGATCCAGCAATGACTTCCAGAAGAGACAAATGAAC  
CTGGCCTGGCAAGGGAGGCAGAGTCAAAGTGTCTGGCTCAAAGCCCACCACAGCCTT  
GGCTCACAGGCATCTCCCGTCTTCC

>812

AAGATTACATCCAAGATCCAGCAATGACTTCCAGAAGAGACAAATGAACCTGGCCTGG

CAAGGGAGGCAGAGTCAAAGTGTCTGGCTCAAAGCCCACCACAGCCTTGGCTCACAG  
GCATCTCCCGGTCTTCCACTCACTC

>813

AGAAGAGACAAATGAACCTGGCCTGGCAAGGGAGGCAGAGTCAAAGTGTCTGGCTC  
AAAGCCCACCACAGCCTTGGCTCACAGGCATCTCCCGGTCTTCCACTCACTCAGTCCT  
TTCAGGGAAAGGCACTGAGCTTTTCT

>814

GAACCTGGCCTGGCAAGGGAGGCAGAGTCAAAGTGTCTGGCTCAAAGCCCACCACAG  
CCTTGGCTCACAGGCATCTCCCGGTCTTCCACTCACTCAGTCCTTTCAGGGAAAGGCA  
CTGAGCTTTTCTCAAGGGAGAACTC

>815

TCAAAGTGTCTGGCTCAAAGCCCACCACAGCCTTGGCTCACAGGCATCTCCCGGTCTT  
CCTCACTCACTCAGTCCTTTCAGGGAAAGGCACTGAGCTTTTCTCAAGGGAGAACTCAA  
AGACGTCTTTCATTTTCATTTACA

>816

CAAAGCCCACCACAGCCTTGGCTCACAGGCATCTCCCGGTCTTCCACTCACTCAGTCC  
TTTCAGGGAAAGGCACTGAGCTTTTCTCAAGGGAGAACTCAAAGACGTCTTTCATTT  
CATCTTACAAATCCACACAAATTT

>817

ACCACAGCCTTGGCTCACAGGCATCTCCCGGTCTTCCACTCACTCAGTCCTTTCAGGG  
AAAGGCACTGAGCTTTTCTCAAGGGAGAACTCAAAGACGTCTTTCATTTTCATTTAC  
AAATCCACACAAATTTGCAATTCC

>818

GGCTCACAGGCATCTCCCGGTCTTCCACTCACTCAGTCCTTTCAGGGAAAGGCACTGA  
GCTTTTCTCAAGGGAGAACTCAAAGACGTCTTTCATTTTCATTTACAAATCCACACAA  
ATTTGCAATTCCACTCCACAAGA

>819

TCCCGGTCTTCCACTCACTCAGTCCTTTCAGGGAAAGGCACTGAGCTTTTCTCAAGGG  
AGAACTCAAAGACGTCTTTCATTTTCATTTACAAATCCACACAAATTTGCAATTCCAC  
TCCACAAGATACGAGCATTGTCT

>820

GGGAGAACTCAAAGACGTCTTTCATTTTCATTTACAAATCCACACAAATTTGCAATTC  
CACTCCACAAGATACGAGCATTGTCTTGCTATAATTTAATATGATTGGCATAAATTACC  
TGTTATCAAGTAAAATAGTT

>821

CTCCAAAGACGTCTTTCATTTTCATTTACAAATCCACACAAATTTGCAATTCCACTCCA  
CAAGATACGAGCATTGTCTTGCTATAATTTAATATGATTGGCATAAATTACCTGTTATC  
AAGTAAAATAGTTTCTTCTT

>822

ACTCCACAAGATACGAGCATTGTCTTGCTATAATTTAATATGATTGGCATAAATTACCT  
GTTATCAAGTAAAATAGTTTCTTCTTATGGCTTGCTGTCGCCCTGACATACCACTGCTATT  
TGAAAAGAGGCTTCTCCAG

>823

AGATACGAGCATTGTCTTGCTATAATTTAATATGATTGGCATAAATTACCTGTTATCAA  
GTAAAATAGTTTCTTCTTATGGCTTGCTGTCGCCCTGACATACCACTGCTATTTGAAAAGA  
GGCTTCTCCAGAACTCAG

>824

CCTGTTATCAAGTAAAATAGTTTCTTCTTATGGCTTGTGTGCCCTGACATACCACTGCT  
ATTTGAAAAGAGGCTTCTCCAGAACTCAGTGTCTGAGAGTACGTGACTGGAAGGTG  
AGTGTGGCTTACCCCTTGCCTT

>825

TGTTATCAAGTAAAATAGTTTCTTCTTATGGCTTGTGTGCCCTGACATACCACTGCTAT  
TTGAAAAGAGGCTTCTCCAGAACTCAGTGTCTGAGAGTACGTGACTGGAAGGTGAG  
TGTTTGCTTACCCCTTGCCTTTT

>826

CTGACATACCACTGCTATTTGAAAAGAGGCTTCTCCAGAACTCAGTGTCTGAGAGTA  
CGTGACTGGAAGGTGAGTGTGGCTTACCCCTTGCCTTTTCTCCCTGTCAGGATAAATG  
GAATATTCTGCTTTAAGGACCCT

>827

ATACCACTGCTATTTGAAAAGAGGCTTCTCCAGAACTCAGTGTCTGAGAGTACGTGA  
CTGGAAGGTGAGTGTGGCTTACCCCTTGCCTTTTCTCCCTGTCAGGATAAATGGAATA  
TTCTGCTTTAAGGACCCTAAGTC

>828

AACTCAGTGTCTGAGAGTACGTGACTGGAAGGTGAGTGTGGCTTACCCCTTGCCTTT  
TCTCCCTGTCAGGATAAATGGAATATTCTGCTTTAAGGACCCTAAGTCTGGCAATATCAT  
GTTTTGTGAACAGCCAACACAG

>829

TGGAAGGTGAGTGTGGCTTACCCCTTGCCTTTTCTCCCTGTCAGGATAAATGGAATAT  
TCTGCTTTAAGGACCCTAAGTCTGGCAATATCATGTTTTGTGAACAGCCAACACAGTAA  
CTATGGTTGAGGCCTGTATTCG

>830

AGTGTGGCTTACCCCTTGCCTTTTCTCCCTGTCAGGATAAATGGAATATTCTGCTTTAA  
GGACCCTAAGTCTGGCAATATCATGTTTTGTGAACAGCCAACACAGTAACTATGGTTGA  
GGCCTGTATTGATGAATGAG

>831

CCCTGTCAGGATAAATGGAATATTCTGCTTTAAGGACCCTAAGTCTGGCAATATCATGTT  
TTGTGAACAGCCAACACAGTAACTATGGTTGAGGCCTGTATTGATGAATGAGGTTTTTC  
ATATGCTTCTTTCACATCAGG

>832

GATAAATGGAATATTCTGCTTTAAGGACCCTAAGTCTGGCAATATCATGTTTTGTGAACA  
GCCAACACAGTAACTATGGTTGAGGCCTGTATTGATGAATGAGGTTTTCATATGCTTCT  
TTCACATCAGGAGAGAGAGA

>833

TCTGCTTTAAGGACCCTAAGTCTGGCAATATCATGTTTTGTGAACAGCCAACACAGTAA  
CTATGGTTGAGGCCTGTATTGATGAATGAGGTTTTCATATGCTTCTTTCACATCAGGAG  
AGAGAGAGAGAAAAAAAAATA

>834

TCTGGCAATATCATGTTTTGTGAACAGCCAACACAGTAACTATGGTTGAGGCCTGTATT  
CGATGAATGAGGTTTTCATATGCTTCTTTCACATCAGGAGAGAGAGAGAGAGAAAAAAA  
ATAATAAAGTTGGTAGAGGACGT

>835

GCCAACACAGTAACTATGGTTGAGGCCTGTATTGATGAATGAGGTTTTCATATGCTTCT

TTCACATCAGGAGAGAGAGAGAGAGAAAAAATAATAAACTTGGTAGAGGACGTGGA  
GTTGTATTTCTGGACTATGGTGG

>836

AACACAGTAACTATGGTTGAGGCCTGTATTTCGATGAATGAGGTTTTTCATATGCTTCTTTC  
ACATCAGGAGAGAGAGAGAGAGAAAAAATAATAAACTTGGTAGAGGACGTGGAGTT  
GTATTTCTGGACTATGGTGGCAC

>837

CACAGTAACTATGGTTGAGGCCTGTATTTCGATGAATGAGGTTTTTCATATGCTTCTTTCAC  
ATCAGGAGAGAGAGAGAGAGAAAAAATAATAAACTTGGTAGAGGACGTGGAGTTGT  
ATTTCTGGACTATGGTGGCACCT

>838

AACTATGGTTGAGGCCTGTATTTCGATGAATGAGGTTTTTCATATGCTTCTTTCACATCAGG  
AGAGAGAGAGAGAGAGAGAAAAAATAATAAACTTGGTAGAGGACGTGGAGTTGTATTTCT  
GGACTATGGTGGCACCTCTAAGG

>839

GAATGAGGTTTTTCATATGCTTCTTTCACATCAGGAGAGAGAGAGAGAGAAAAAATAA  
TAACTTGGTAGAGGACGTGGAGTTGTATTTCTGGACTATGGTGGCACCTCTAAGGAG  
CATGGTTTTCTTTTCATGGCTT

>840

GAGAAAAAATAATAAACTTGGTAGAGGACGTGGAGTTGTATTTCTGGACTATGGT  
GGCACCTCTAAGGAGCATGGTTTTCTTTTCATGGCTTTGTCCATTACTATAACACTCC  
TGTTATAAATAGCTGCCGTGG

>841

AAAAAATAATAAACTTGGTAGAGGACGTGGAGTTGTATTTCTGGACTATGGTGGC  
ACCTCTAAGGAGCATGGTTTTCTTTTCATGGCTTTGTCCATTACTATAACACTCCTGT  
TATAAATAGCTGCCGTGGATT

>842

ACCTCTAAGGAGCATGGTTTTCTTTTCATGGCTTTGTCCATTACTATAACACTCCTGT  
TATAAATAGCTGCCGTGGATTGAAATCCATAATGTTAACTCAAAGTTAAGCAGTCCG  
CTATTAACAGCATAAGAAAC

>843

GTCCATTACTATAACACTCCTGTTATAAATAGCTGCCGTGGATTGAAATCCATAATGTT  
AACTCAAAGTTAAGCAGTCCGCTATTAACAGCATAAGAACTGTTACCTATCCCCTC  
TTCCTGGCCCCCAACAAAGA

>844

TACTATAACACTCCTGTTATAAATAGCTGCCGTGGATTGAAATCCATAATGTTAACTC  
AAAAGTTAAGCAGTCCGCTATTAACAGCATAAGAACTGTTACCTATCCCCTCTTCTC  
GGCCCCCAACAAAGAAACAG

>845

CTATAACACTCCTGTTATAAATAGCTGCCGTGGATTGAAATCCATAATGTTAACTCAA  
AGTTAAGCAGTCCGCTATTAACAGCATAAGAACTGTTACCTATCCCCTCTTCTGGC  
CCCCAACAAGAAACAGCAA

>846

TATAAATAGCTGCCGTGGATTGAAATCCATAATGTTAACTCAAAGTTAAGCAGTCCG  
CTATTAACAGCATAAGAACTGTTACCTATCCCCTCTTCTGGCCCCCAACAAAGAA  
ACAGCAAAGTTAAAAAGCC

>847

GTAAAGCAGTCCGCTATTAACAGCATAAGAACTGTTACCTATCCCCTCTCCTGGCC  
CCCCAACAAAGAAACAGCAAAGTAAAAAAGCCCATGTCTCCCCATGAGGACTTG  
GGGTTAATTTTCAGCATGGTGTCT

>848

CAGTCCGCTATTAACAGCATAAGAACTGTTACCTATCCCCTCTCCTGGCCCCCAA  
CAAAGAAACAGCAAAGTAAAAAAGCCCATGTCTCCCCATGAGGACTTGGGGTTAA  
TTTTCAGCATGGTGTCTGGGGAT

>849

AGCATAAGAACTGTTACCTATCCCCTCTCCTGGCCCCCAACAAAGAAACAGCAA  
CTGTTAAAAAAGCCCATGTCTCCCCATGAGGACTTGGGGTTAATTTTCAGCATGGTGTCT  
TGGGGATTCATCTGTGGGACTCC

>850

CCCAACAAAGAAACAGCAAAGTAAAAAAGCCCATGTCTCCCCATGAGGACTTGG  
GGTTAATTTTCAGCATGGTGTCTGGGGATTCATCTGTGGGACTCCTATTACCCATAATAG  
GACTCATGCTGCTTCATTTTCATG

>851

GAGGACTTGGGGTTAATTTTCAGCATGGTGTCTGGGGATTCATCTGTGGGACTCCTATT  
ACCCATAATAGGACTCATGCTGCTTCATTTTCATGCACACGATATGGAAAATGCACCCTTC  
CCTAGTGATGAAATTTTAGTT

>852

CTATTACCCATAATAGGACTCATGCTGCTTCATTTTCATGCACACGATATGGAAAATGCAC  
CCTCCCTAGTGATGAAATTTTAGTTTTGAAATTGAGGCTAGCTTTTGCAGAACAAAGC  
AGATTCCCAGAAACACCAAAA

>853

AGGACTCATGCTGCTTCATTTTCATGCACACGATATGGAAAATGCACCCTTCCCTAGTGA  
TGAAATTTTAGTTTTGAAATTGAGGCTAGCTTTTGCAGAACAAAGCAGATTCCCAGAA  
ACACCAAAAACACTATTCAATGTTG

>854

CTTCATTTTCATGCACACGATATGGAAAATGCACCCTTCCCTAGTGATGAAATTTTAGTTT  
TGAAATTGAGGCTAGCTTTTGCAGAACAAAGCAGATTCCCAGAAACACCAAAAACACTAT  
TCAATGTTGGCCTAGAGCCTGT

>855

TTTCATGCACACGATATGGAAAATGCACCCTTCCCTAGTGATGAAATTTTAGTTTTGAAA  
TTGAGGCTAGCTTTTGCAGAACAAAGCAGATTCCCAGAAACACCAAAAACACTATTCAAT  
GTTGGCCTAGAGCCTGTGTGTCT

>856

CCCTTCCCTAGTGATGAAATTTTAGTTTTGAAATTGAGGCTAGCTTTTGCAGAACAAAG  
CAGATTCCCAGAAACACCAAAAACACTATTCAATGTTGGCCTAGAGCCTGTGTGTCCGTG  
CTTAGGTGAGTATGTGTATCTGA

>857

AATTGAGGCTAGCTTTTGCAGAACAAAGCAGATTCCCAGAAACACCAAAAACACTATTCA  
ATGTTGGCCTAGAGCCTGTGTGTCCGTGCTTAGGTGAGTATGTGTATCTGAAAGGGAGA  
AAATGCCTTCTCTAAGTGCGTA

>858

TTGAGGCTAGCTTTTGCAGAACAAAGCAGATTCCCAGAAACACCAAAAACACTATTCAAT

GTTGGCCTAGAGCCTGTGTGTCCGTGCTTAGGTGAGTATGTGTATCTGAAAGGGAGAA  
AATGCCTTCCTCTAAGTGCATG

>859

AGCAGATCCCAGAAACACCAAAAACTATTCAATGTTGGCCTAGAGCCTGTGTGTCCG  
TGCTTAGGTGAGTATGTGTATCTGAAAGGGAGAAAATGCCTTCCTCTAAGTGCATG  
CCCTCTCAAAGACAATATTCAA

>860

CACCAAAAACTATTCAATGTTGGCCTAGAGCCTGTGTGTCCGTGCTTAGGTGAGTATG  
TATCTGAAAGGGAGAAAATGCCTTCCTCTAAGTGCATGCCCTCTCAAAGACAATA  
TTCAAATATCATGCCGATAGC

>861

AAAACTATTCAATGTTGGCCTAGAGCCTGTGTGTCCGTGCTTAGGTGAGTATGTGT  
CTGAAAGGGAGAAAATGCCTTCCTCTAAGTGCATGCCCTCTCAAAGACAATATTCA  
AATATCATGCCGATAGCTGAC

>862

GCCTAGAGCCTGTGTGTCCGTGCTTAGGTGAGTATGTGTATCTGAAAGGGAGAAAATG  
CCTTCCTCTAAGTGCATGCCCTCTCAAAGACAATATTCAAATATCATGCCGATAGC  
TGACAGCGGTCAATGGTTGCTA

>863

TGCTTAGGTGAGTATGTGTATCTGAAAGGGAGAAAATGCCTTCCTCTAAGTGCATG  
CCCTCTCAAAGACAATATTCAAATATCATGCCGATAGCTGACAGCGGTCAATGGTTG  
TATGCTTCATCCCAAAGCTTTG

>864

GGGAGAAAATGCCTTCCTCTAAGTGCATGCCCTCTCAAAGACAATATTCAAATATC  
ATGCCGATAGCTGACAGCGGTCAATGGTTGCTATGCTTCATCCCAAAGCTTTGTTAGG  
AACCCATAAAACCTGGCACAT

>865

AATGCCTTCCTCTAAGTGCATGCCCTCTCAAAGACAATATTCAAATATCATGCCCGA  
TAGCTGACAGCGGTCAATGGTTGCTATGCTTCATCCCAAAGCTTTGTTAGGAACCCAT  
AAAACCTGGCACATGGTTTGT

>866

CAAAGACAATATTCAAATATCATGCCGATAGCTGACAGCGGTCAATGGTTGCTATGCT  
TCATCCCAAAGCTTTGTTAGGAACCCATAAAACCTGGCACATGGTTTGTGACACCCA  
GTGAAACACCGTGCTTCTCCAT

>867

GTTGCTATGCTTCATCCCAAAGCTTTGTTAGGAACCCATAAAACCTGGCACATGGTTT  
GTGACACCCAGTGAAACACCGTGCTTCTCCATAATATCCTGAGCCCTGCTGCCTGTCA  
TTAAGGACCTCTTATTAAG

>868

ACCCATAAAACCTGGCACATGGTTTGTGACACCCAGTGAAACACCGTGCTTCTCCAT  
AATATCCTGAGCCCTGCTGCCTGTCATTAAGGGACCTCTTATTAAGCATCTCTTTTTT  
AAATGGCTGCCATCATCTGGT

>869

TGGTTTGTGACACCCAGTGAAACACCGTGCTTCTCCATAATATCCTGAGCCCTGCTGC  
CTGTCATTAAGGGACCTCTTATTAAGCATCTTTTTTAAATGGCTGCCATCATCTGG  
TCCCAGTGACATTAATCCC

>870

TGAAACACCGTGCTTCTCCATAATATCCTGAGCCCTGCTGCCTGTCATTAAGGGACCT  
CTCTTATTAAGCATCTCTTTTTTAAATGGCTGCCATCATCTGGTCCCAGTGACATTAAT  
CCCATTATAATTATAAACAC

>871

CTGCCTGTCATTAAGGGACCTCTTATTAAGCATCTCTTTTTTAAATGGCTGCCATCAT  
CTGGTCCCAGTGACATTAATCCCATTATAATTATAAACACACTTCCCATAACATTCGT  
TGCAGATCTCACCTCAGT

>872

TCATCTGGTCCCAGTGACATTAATCCCATTATAATTATAAACACACTTCCCATAACAT  
TCGTTGCAGATCTCACCTCAGTGCCTACCCCCTTAGGGCATCTTTGCACTAATAACAA  
CTCAGATTTGCTATCTGAGT

>873

GTGTACATTAATCCCATTATAATTATAAACACACTTCCCATAACATTCGTTGCAGATCT  
CACCTCAGTGCCTACCCCCTTAGGGCATCTTTGCACTAATAACAACACTCAGATTTGCTAT  
CTGAGTTGACAACATTAGG

>874

TAACATTCGTTGCAGATCTCACCTCAGTGCCTACCCCCTTAGGGCATCTTTGCACTAAT  
AACAACACTCAGATTTGCTATCTGAGTTGACAACATTAGGTCCCAACACCATTGCAATAT  
GCTGGGGAAAGAGACAGAGAG

>875

GATCTCACCTCAGTGCCTACCCCCTTAGGGCATCTTTGCACTAATAACAACACTCAGATT  
TGCTATCTGAGTTGACAACATTAGGTCCCAACACCATTGCAATATGCTGGGGAAAGAG  
ACAGAGAGAGAAGAAAAAGCTT

>876

AACAACACTCAGATTTGCTATCTGAGTTGACAACATTAGGTCCCAACACCATTGCAATAT  
GCTGGGGAAAGAGACAGAGAGAGAAGAAAAAGCTTTTTCTCCTTAATCACGAAGAT  
CTTGGGGTCACAGTGACCCAAGGC

>877

CAACTCAGATTTGCTATCTGAGTTGACAACATTAGGTCCCAACACCATTGCAATATGC  
TGGGGAAAGAGACAGAGAGAGAAGAAAAAGCTTTTTCTCCTTAATCACGAAGATCT  
TGGGGTCACAGTGACCCAAGGCCT

>878

GAGTTGACAACATTAGGTCCCAACACCATTGCAATATGCTGGGGAAAGAGACAGAGA  
GAGAAGAAAAAGCTTTTTCTCCTTAATCACGAAGATCTTGGGGTCACAGTGACCCA  
GGCCTCAGGAGCTAAAAAAAAAAAA

>879

GCTGGGGAAAGAGACAGAGAGAGAAGAAAAAGCTTTTTCTCCTTAATCACGAAGAT  
CTTGGGGTCACAGTGACCCAAGGCCTCAGGAGCTAAAAAAAAAAAAATCCCTCCTCCT  
ACCCTTTGAAAAGTCACTCTCTACT

>880

AGAGACAGAGAGAGAAGAAAAAGCTTTTTCTCCTTAATCACGAAGATCTTGGGGTCA  
CAGTGACCCAAGGCCTCAGGAGCTAAAAAAAAAAAAATCCCTCCTCCTACCCTTTTGAA  
AAGTCACTCTCTACTTACAGATG

>881

TTGGGGTCACAGTGACCCAAGGCCTCAGGAGCTAAAAAAAAAAAAATCCCTCCTCCTA

CCCTTTTAAAAAGTCACTCTCTACTCTACAGATGAGGGAAGGGCATACTTGGCACCTG  
GGAGAGAAACTCAAGTTTGTAACA

>882

AAGGCCTCAGGAGCTAAAAAAAAAAAAATCCCTCCTCTACCCTTTTAAAAAGTCACTC  
TCTACTCTACAGATGAGGGAAGGGCATACTTGGCACCTGGGAGAGAAACTCAAGTTTG  
TAAACACCACTAACCAGGTCTCTG

>883

TCCTCCTACCCTTTTAAAAAGTCACTCTCTACTCTACAGATGAGGGAAGGGCATACTTG  
GCACCTGGGAGAGAAACTCAAGTTTGTAACACCACTAACCAGGTCTCTGTTGGTTGG  
GGCGGTGATGGTGGTGGTAGTGG

>884

CTCCTACCCTTTTAAAAAGTCACTCTCTACTCTACAGATGAGGGAAGGGCATACTTGGC  
ACCTGGGAGAGAAACTCAAGTTTGTAACACCACTAACCAGGTCTCTGTTGGTTGGGG  
CGGTGATGGTGGTGGTAGTGGTG

>885

TTTTAAAAAGTCACTCTCTACTCTACAGATGAGGGAAGGGCATACTTGGCACCTGGGA  
GAGAAACTCAAGTTTGTAACACCACTAACCAGGTCTCTGTTGGTTGGGGCGGTGATG  
GTGGTGGTAGTGGTGGGGTGGGGG

>886

TCTACAGATGAGGGAAGGGCATACTTGGCACCTGGGAGAGAAACTCAAGTTTGTAAC  
ACCACTAACCAGGTCTCTGTTGGTTGGGGCGGTGATGGTGGTGGTAGTGGTGGGGTGG  
GGGATGAGGGATGATGGCAATCAC

>887

GAGAGAAACTCAAGTTTGTAACACCACTAACCAGGTCTCTGTTGGTTGGGGCGGTGA  
TGGTGGTGGTAGTGGTGGGGTGGGGGATGAGGGATGATGGCAATCACTAATCAAAGAA  
GCTGTCTTATTTGTTTGCTGAGC

>888

AAACACCACTAACCAGGTCTCTGTTGGTTGGGGCGGTGATGGTGGTGGTAGTGGTGGG  
GTGGGGGATGAGGGATGATGGCAATCACTAATCAAAGAAGCTGTCTTATTTGGTTTGCT  
GAGCCTCAACTAACCGAATGCA

>889

GGTTGGGGCGGTGATGGTGGTGGTAGTGGTGGGGTGGGGGATGAGGGATGATGGCAA  
TCACTAATCAAAGAAGCTGTCTTATTTGGTTTGCTGAGCCTCAACTAACCGAATGCAT  
ACATCACCTGATTCTTTCCCCTC

>890

GTGGTGGGGTGGGGGATGAGGGATGATGGCAATCACTAATCAAAGAAGCTGTCTTATT  
TGTTTTGCTGAGCCTCAACTAACCGAATGCATACATCACCTGATTCTTTCCCCTCTG  
CTTTTTGGAGGGGGCATCTAAGG

>891

TTGTTTTGCTGAGCCTCAACTAACCGAATGCATACATCACCTGATTCTTTCCCCTCT  
GCTTTTTGGAGGGGGCATCTAAGGACATAATGTAAGAATTAAAAATTTAAAAACAAA  
AACAAAATGTCAACATATGCAGG

>892

GCCTCAACTAACCGAATGCATACATCACCTGATTCTTTCCCCTCTGCTTTTTGGAGG  
GGGCATCTAAGGACATAATGTAAGAATTAAAAATTTAAAAACAAAAACAAAATGTCA  
ACATATGCAGGAGTAAATCCAC



>893

AATGCATACATCACCTGATTCTTTCCCCCTCTGCTTTTGGAGGGGGCATCTAAGGACAT  
AATGTAAAAGAATTAATAATTAATAACAAAAACAAAATGTCAACATATGCAGGAGTAA  
ATTCCACTCTGCCTAATTTTTT

>894

GGGGGCATCTAAGGACATAATGTAAAAGAATTAATAATTAATAACAAAAACAAAATGT  
CAACATATGCAGGAGTAAATCCACTCTGCCTAATTTTTTTTTTTTTTTGAAATGAGATC  
TTGTTCTGTCAACCAGGCTGGA

>895

GGCATCTAAGGACATAATGTAAAAGAATTAATAATTAATAACAAAAACAAAATGTCAA  
CATATGCAGGAGTAAATCCACTCTGCCTAATTTTTTTTTTTTTTTGAAATGAGATCTTGT  
TCTGTCAACCAGGCTGGAGGG

>896

AAAAACAAAATGTCAACATATGCAGGAGTAAATCCACTCTGCCTAATTTTTTTTTTTTT  
TTGAAATGAGATCTTGTCTGTCAACCAGGCTGGAGGGCAGTGGTGCAATCTCAGCTC  
ACTGCAGCCACCACCTCCCAGG

>897

ATGCAGGAGTAAATCCACTCTGCCTAATTTTTTTTTTTTTTTGAAATGAGATCTTGTTC  
TGTCAACCAGGCTGGAGGGCAGTGGTGCAATCTCAGCTCACTGCAGCCACCACCTCCC  
AGGTTCAAGCGATTCTCCCGCC

>898

ATTCCACTCTGCCTAATTTTTTTTTTTTTTTGAAATGAGATCTTGTCTGTCAACCAGGC  
TGGAGGGCAGTGGTGCAATCTCAGCTCACTGCAGCCACCACCTCCCAGGTTCAAGCGA  
TTCTCCCGCCTCAGCCCCCTAA

>899

TTTTTTTGAATGAGATCTTGTCTGTCAACCAGGCTGGAGGGCAGTGGTGCAATCTCA  
GCTCACTGCAGCCACCACCTCCCAGGTTCAAGCGATTCTCCCGCCTCAGCCCCCTAAG  
TAGCTGGTATTACAGGCACGTGC

>900

GATCTTGTCTGTCAACCAGGCTGGAGGGCAGTGGTGCAATCTCAGCTCACTGCAGCC  
ACCACCTCCCAGGTTCAAGCGATTCTCCCGCCTCAGCCCCCTAAGTAGCTGGTATTACA  
GGCACGTGCCACCACGCCTGGCT

>901

TTCTGTCAACCAGGCTGGAGGGCAGTGGTGCAATCTCAGCTCACTGCAGCCACCACCT  
CCCAGGTTCAAGCGATTCTCCCGCCTCAGCCCCCTAAGTAGCTGGTATTACAGGCACGT  
GCCACCACGCCTGGCTAATTTTT

>902

GGTGCAATCTCAGCTCACTGCAGCCACCACCTCCCAGGTTCAAGCGATTCTCCCGCCT  
CAGCCCCCTAAGTAGCTGGTATTACAGGCACGTGCCACCACGCCTGGCTAATTTTTGTA  
TTTTTAGTAGAGATAGGGTTTCA

>903

CACTGCAGCCACCACCTCCCAGGTTCAAGCGATTCTCCCGCCTCAGCCCCCTAAGTAG  
CTGGTATTACAGGCACGTGCCACCACGCCTGGCTAATTTTTGTATTTTTAGTAGAGATAG  
GGTTTACCATGTTGGCCAGGC

>904

GCCTCAGCCCCCTAAGTAGCTGGTATTACAGGCACGTGCCACCACGCCTGGCTAATTTTT

TGTATTTTTAGTAGAGATAGGGTTTCACCATGTTGGCCAGGCTGGTCTCAAACCTCCTGA  
CCTCAAGTGATCCGCCTGCCTC

>905

CCCTAAGTAGCTGGTATTACAGGCACGTGCCACCACGCCTGGCTAATTTTTGTATTTTTA  
GTAGAGATAGGGTTTCACCATGTTGGCCAGGCTGGTCTCAAACCTCCTGACCTCAAGTG  
ATCCGCCTGCCTCGGCCTCCTA

>906

AGGCACGTGCCACCACGCCTGGCTAATTTTTGTATTTTTAGTAGAGATAGGGTTTCACC  
ATGTTGGCCAGGCTGGTCTCAAACCTCCTGACCTCAAGTGATCCGCCTGCCTCGGCCTC  
CTAAAGTGCTGGGAGTACAGGCA

>907

TTTTTGTATTTTTAGTAGAGATAGGGTTTCACCATGTTGGCCAGGCTGGTCTCAAACCTCC  
TGACCTCAAGTGATCCGCCTGCCTCGGCCTCCTAAAGTGCTGGGAGTACAGGCATGAG  
CCTGCGCCCAGCCTACTCTG

>908

TTCACCATGTTGGCCAGGCTGGTCTCAAACCTCCTGACCTCAAGTGATCCGCCTGCCTC  
GGCCTCCTAAAGTGCTGGGAGTACAGGCATGAGCCACTGCGCCCAGCCTACTCTGCC  
AATTGTTGACATCACCTACAGCTC

>909

TTGGCCAGGCTGGTCTCAAACCTCCTGACCTCAAGTGATCCGCCTGCCTCGGCCTCCTA  
AAGTGCTGGGAGTACAGGCATGAGCCACTGCGCCCAGCCTACTCTGCCAATTGTTGA  
CATCACCTACAGCTCTATAGTAGA

>910

GTCTCAAACCTCCTGACCTCAAGTGATCCGCCTGCCTCGGCCTCCTAAAGTGCTGGGAG  
TACAGGCATGAGCCACTGCGCCCAGCCTACTCTGCCAATTGTTGACATCACCTACAGC  
TCTATAGTAGATGTCTGGAATGA

>911

AAGTGCTGGGAGTACAGGCATGAGCCACTGCGCCCAGCCTACTCTGCCAATTGTTGA  
CATCACCTACAGCTCTATAGTAGATGTCTGGAATGATGATCTGAAGGACTGTAAGACTG  
TAAGATTTTTTACTCCAGAAAT

>912

GGAGTACAGGCATGAGCCACTGCGCCCAGCCTACTCTGCCAATTGTTGACATCACCT  
ACAGCTCTATAGTAGATGTCTGGAATGATGATCTGAAGGACTGTAAGACTGTAAGATTT  
TTTACTCCAGAAATGGACACAA

>913

CAGCCTACTCTGCCAATTGTTGACATCACCTACAGCTCTATAGTAGATGTCTGGAATGA  
TGATCTGAAGGACTGTAAGACTGTAAGATTTTTTACTCCAGAAATGGACACAATAGG  
CTTGCGGTGTCTTCCCCTAACA

>914

TTGTTGACATCACCTACAGCTCTATAGTAGATGTCTGGAATGATGATCTGAAGGACTGT  
AAGACTGTAAGATTTTTTACTCCAGAAATGGACACAATAGGCTTGCGGTGTCTTCCCC  
TAACAGTCCCTGGCAGGGTAAA

>915

ACAGCTCTATAGTAGATGTCTGGAATGATGATCTGAAGGACTGTAAGACTGTAAGATTT  
TTTACTCCAGAAATGGACACAATAGGCTTGCGGTGTCTTCCCCTAACAGTCCCTGGC  
AGGGTAAAGGTCTGATGCCCTGG

>916

ATGTCTGGAATGATGATCTGAAGGACTGTAAGACTGTAAGATTTTTTACTCCAGAAAT  
GGACACAATAGGCTTGC GG TGTCTTCCCCTAACAGTCCCTGGCAGGGTAAAGGTCTGA  
TGCCCTGGTACGTTCCCCAGTGG

>917

ACTGTAAGACTGTAAGATTTTTTACTCCAGAAATGGACACAATAGGCTTGC GG TGTCT  
TCCCCTAACAGTCCCTGGCAGGGTAAAGGTCTGATGCCCTGGTACGTTCCCCAGTGGC  
AATCTGGAGTTCTCAACTGCAGA

>918

TGTAAGATTTTTTACTCCAGAAATGGACACAATAGGCTTGC GG TGTCTTCCCCTAAC  
GTCCCTGGCAGGGTAAAGGTCTGATGCCCTGGTACGTTCCCCAGTGGCAATCTGGAGT  
TCTCAACTGCAGAGAATACTTTT

>919

TTTTTTACTCCAGAAATGGACACAATAGGCTTGC GG TGTCTTCCCCTAACAGTCCCTG  
GCAGGGTAAAGGTCTGATGCCCTGGTACGTTCCCCAGTGGCAATCTGGAGTTCTCAAC  
TGCAGAGAATACTTTTCTCTAC

>920

TAGGCTTGC GG TGTCTTCCCCTAACAGTCCCTGGCAGGGTAAAGGTCTGATGCCCTGGT  
ACGTTCCCCAGTGGCAATCTGGAGTTCTCAACTGCAGAGAATACTTTTCTCTACTCAG  
GGGCGTCACTACCTGCATCTCT

>921

GTCCCTGGCAGGGTAAAGGTCTGATGCCCTGGTACGTTCCCCAGTGGCAATCTGGAGT  
TCTCAACTGCAGAGAATACTTTTCTCTACTCAGGGGCGTCACTACCTGCATCTCTCCC  
TGAACATGCTTCATTTTCCACTC

>922

CCCTGGCAGGGTAAAGGTCTGATGCCCTGGTACGTTCCCCAGTGGCAATCTGGAGTTC  
TCAACTGCAGAGAATACTTTTCTCTACTCAGGGGCGTCACTACCTGCATCTCTCCCTG  
AACATGCTTCATTTTCCACTCAT

>923

GATGCCCTGGTACGTTCCCCAGTGGCAATCTGGAGTTCTCAACTGCAGAGAATACTTTT  
CCTCTACTCAGGGGCGTCACTACCTGCATCTCTCCCTGAACATGCTTCATTTTCCACTCA  
TCACAAGTTTTTGGGGAAATG

>924

TTTCTCTACTCAGGGGCGTCACTACCTGCATCTCTCCCTGAACATGCTTCATTTTCCAC  
TCATCACAAGTTTTTGGGGAAATGCAAAGTGGCATCTTCTCCCCAAAAGGTAGGGATC  
TTTGATTTTTTTAATCACGATA

>925

TCACTACCTGCATCTCTCCCTGAACATGCTTCATTTTCCACTCATCACAAGTTTTTGGGG  
AAATGCAAAGTGGCATCTTCTCCCCAAAAGGTAGGGATCTTTGATTTTTTTAATCACGA  
TAGAAAAGTTTACTTTGAAAT

>926

TGAACATGCTTCATTTTCCACTCATCACAAGTTTTTGGGGAAATGCAAAGTGGCATCTT  
CTCCCCAAAAGGTAGGGATCTTTGATTTTTTTAATCACGATAGAAAAGTTTACTTTGAA  
ATAAAAAAATTAATATATGTT

>927

CATGCTTCATTTTCCACTCATCACAAGTTTTTGGGGAAATGCAAAGTGGCATCTTCTCC

CCAAAAGGTAGGGATCTTTGATTTTTTAATCACGATAGAAAAGTTTACTTTGAAATAA  
AAAAATTAATATATGTTCCAA

>928

TTTTGGGAAAATGCAAAGTGGCATCTTCTCCCAAAAAGGTAGGGATCTTTGATTTTTT  
AATCACGATAGAAAAGTTTACTTTGAAATAAAAAAATTAATATATGTTCCAAATTAAG  
AGTTGGAACCTAAAGAGTTGCA

>929

TTGATTTTTTAATCACGATAGAAAAGTTTACTTTGAAATAAAAAAATTAATATATGTT  
CCAAATTAAGAGTTGGAACCTAAAGAGTTGCAACATTCCATTCACTCAGATACTCAA  
AACACCACTGTATTCTTCTTC

>930

GATTTTTTTAATCACGATAGAAAAGTTTACTTTGAAATAAAAAAATTAATATATGTTCC  
AAATTAAGAGTTGGAACCTAAAGAGTTGCAACATTCCATTCACTCAGATACTCAAAA  
CACCACTGTATTCTTCTTCCT

>931

AAAAAATTAATATATGTTCCAAATTAAGAGTTGGAACCTAAAGAGTTGCAACATTCCA  
TTCATACTCAGATACTCAAAACACCACTGTATTCTTCTTCTCCTATCTCTTAGTTGAAGTT  
TTTTTTGTAATCAAAGCCC

>932

AAGAGTTGCAACATTCCATTCACTCAGATACTCAAAACACCACTGTATTCTTCTTCCT  
ATCTCTTAGTTGAAGTTTTTTTTGTAATCAAAGCCCCCTCCCAATTTCTGCCTGAG  
ATTCTGAGGGAGGAGGAAAA

>933

TGCAACATTCCATTCACTCAGATACTCAAAACACCACTGTATTCTTCTTCTCCTATCTCT  
TTAGTTGAAGTTTTTTTTGTAATCAAAGCCCCCTCCCAATTTCTGCCTGAGATTCTG  
AGGGAGGAGGAAAAGTGTA

>934

CAGATACTCAAAACACCACTGTATTCTTCTTCTCCTATCTCTTAGTTGAAGTTTTTTTTGT  
AATCAAAGCCCCCTCCCAATTTCTGCCTGAGATTCTGAGGGAGGAGGAAAAGTGTA  
AGATCCTGGGGGATCTAAGTC

>935

TCTTCTCCTATCTCTTAGTTGAAGTTTTTTTTGTAATCAAAGCCCCCTCCCAATTT  
CTGCCTGAGATTCTGAGGGAGGAGGAAAAGTGTAAGATCCTGGGGGATCTAAGTCTCT  
TTACCTGGTGACCAAGCTGAG

>936

TTTAGTTGAAGTTTTTTTTGTAATCAAAGCCCCCTCCCAATTTCTGCCTGAGATTCT  
GAGGGAGGAGGAAAAGTGTAAGATCCTGGGGGATCTAAGTCTCTTACCTGGTGACCA  
AGCTGAGAACCATTTGGTCCTC

>937

TTTTTTTTGTAATCAAAGCCCCCTCCCAATTTCTGCCTGAGATTCTGAGGGAGGAGG  
AAAAGTGTAAGATCCTGGGGGATCTAAGTCTCTTACCTGGTGACCAAGCTGAGAACC  
ATTTGGTCCTCAGCTTGGCTGGC

>938

AGCCCCCTCCCAATTTCTGCCTGAGATTCTGAGGGAGGAGGAAAAGTGTAAGATCCT  
GGGGGATCTAAGTCTCTTACCTGGTGACCAAGCTGAGAACCATTTGGTCCTCAGCTT  
GGCTGGCTGCTGCACAGATCTTGG

>939

CTGAGATTCTGAGGGAGGAGGAAAAGTGTAAGATCCTGGGGGATCTAAGTCTCTTTAC  
CTGGTGACCAAGCTGAGAACCATTTGGTCCTCAGCTTGGCTGGCTGCTGCACAGATCT  
TGGCCTCAGCAGAGTAAGAGAAGA

>940

AAAGTGTAAGATCCTGGGGGATCTAAGTCTCTTTACCTGGTGACCAAGCTGAGAACCA  
TTTGGTCCTCAGCTTGGCTGGCTGCTGCACAGATCTTGGCCTCAGCAGAGTAAGAGAA  
GAAGGAAAATTTAAAGCCCTTGCT

>941

ATCTAAGTCTCTTTACCTGGTGACCAAGCTGAGAACCATTTGGTCCTCAGCTTGGCTGG  
CTGCTGCACAGATCTTGGCCTCAGCAGAGTAAGAGAAGAAGGAAAATTTAAAGCCCT  
TGCTTCCTTCATCTATTTCACTAG

>942

TACCTGGTGACCAAGCTGAGAACCATTTGGTCCTCAGCTTGGCTGGCTGCTGCACAGA  
TCTTGGCCTCAGCAGAGTAAGAGAAGAAGGAAAATTTAAAGCCCTTGCTTCCTTCATC  
TATTTCACTAGAGGCTACATAATC

>943

GTCCTCAGCTTGGCTGGCTGCTGCACAGATCTTGGCCTCAGCAGAGTAAGAGAAGAA  
GGAAAATTTAAAGCCCTTGCTTCCTTCATCTATTTCACTAGAGGCTACATAATCTAGAA  
GTTAAGAGCATGAGCTTTGCAGTC

>944

ATCTTGGCCTCAGCAGAGTAAGAGAAGAAGGAAAATTTAAAGCCCTTGCTTCCTTCAT  
CTATTTCACTAGAGGCTACATAATCTAGAAGTTAAGAGCATGAGCTTTGCAGTCAGAAT  
GGTCTGATTTAAAGTTTCAGCTC

>945

AGTAAGAGAAGAAGGAAAATTTAAAGCCCTTGCTTCCTTCATCTATTTCACTAGAGGCT  
ACATAATCTAGAAGTTAAGAGCATGAGCTTTGCAGTCAGAATGGTCTGATTTAAAGTTT  
CAGCTCTGATGTTTAATAGATC

>946

AAATTTAAAGCCCTTGCTTCCTTCATCTATTTCACTAGAGGCTACATAATCTAGAAGTTA  
AGAGCATGAGCTTTGCAGTCAGAATGGTCTGATTTAAAGTTTCAGCTCTGATGTTTAAT  
AGATCTACAGTCTGCAGTAAG

>947

AGCCCTTGCTTCCTTCATCTATTTCACTAGAGGCTACATAATCTAGAAGTTAAGAGCATG  
AGCTTTGCAGTCAGAATGGTCTGATTTAAAGTTTCAGCTCTGATGTTTAATAGATCTACA  
GTCTGCAGTAAGGCACTTAA

>948

TTTCACTAGAGGCTACATAATCTAGAAGTTAAGAGCATGAGCTTTGCAGTCAGAATGGT  
CTGATTTAAAGTTTCAGCTCTGATGTTTAATAGATCTACAGTCTGCAGTAAGGCACTTAA  
TCTCTCTGAACCTCAGTTTTTC

>949

TAGAAGTTAAGAGCATGAGCTTTGCAGTCAGAATGGTCTGATTTAAAGTTTCAGCTCTG  
ATGTTTAATAGATCTACAGTCTGCAGTAAGGCACTTAATCTCTCTGAACCTCAGTTTTCA  
TGCCACAGAAATTGGGAAAA

>950

AAGAGCATGAGCTTTGCAGTCAGAATGGTCTGATTTAAAGTTTCAGCTCTGATGTTTAA

TAGATCTACAGTCTGCAGTAAGGCACTTAATCTCTCTGAACCTCAGTTTTTCATGTCCAC  
AGAAATTGGGAAAATAATAGCA

>951

TGAGCTTTGCAGTCAGAATGGTCTGATTTAAAGTTTCAGCTCTGATGTTTAATAGATCTA  
CAGTCTGCAGTAAGGCACTTAATCTCTCTGAACCTCAGTTTTTCATGTCCACAGAAATTG  
GGAAAATAATAGCACCTGCAT

>952

TAAAGTTTCAGCTCTGATGTTTAATAGATCTACAGTCTGCAGTAAGGCACTTAATCTCTC  
TGAACCTCAGTTTTTCATGTCCACAGAAATTGGGAAAATAATAGCACCTGCATTAATAGG  
ATTGTTATGTGGATTAATAA

>953

AGTCTGCAGTAAGGCACTTAATCTCTCTGAACCTCAGTTTTTCATGTCCACAGAAATTGG  
GAAAATAATAGCACCTGCATTAATAGGATTGTTATGTGGATTAATAAAAACAACATAGGT  
AATGTGTTGAGTTTCGTAGTC

>954

ACTTAATCTCTCTGAACCTCAGTTTTTCATGTCCACAGAAATTGGGAAAATAATAGCACC  
TGCATTAATAGGATTGTTATGTGGATTAATAAAAACAACATAGGTAATGTGTTGAGTTTC  
GTAGTCAGTGCTCAGAATGAG

>955

CACAGAAATTGGGAAAATAATAGCACCTGCATTAATAGGATTGTTATGTGGATTAATAA  
AACAACATAGGTAATGTGTTGAGTTTCGTAGTCAGTGCTCAGAATGAGTTATTATTTTCG  
CTGTCTCCTTCCTGTATGAT

>956

AAAATAATAGCACCTGCATTAATAGGATTGTTATGTGGATTAATAAAAACAACATAGGTA  
ATGTGTTGAGTTTCGTAGTCAGTGCTCAGAATGAGTTATTATTTTCGCTGTCTCCTTCCT  
GTATGATCTCTTAGAACTGC

>957

AGCACCTGCATTAATAGGATTGTTATGTGGATTAATAAAAACAACATAGGTAATGTGTTG  
AGTTTCGTAGTCAGTGCTCAGAATGAGTTATTATTTTCGCTGTCTCCTTCCTGTATGATC  
TCTTAGAACTGCTATACCCT

>958

GATTGTTATGTGGATTAATAAAAACAACATAGGTAATGTGTTGAGTTTCGTAGTCAGTG  
CTCAGAATGAGTTATTATTTTCGCTGTCTCCTTCCTGTATGATCTCTTAGAACTGCTATAC  
CCTCCTGTTCCACTAACTGA

>959

GTTGAGTTTCGTAGTCAGTGCTCAGAATGAGTTATTATTTTCGCTGTCTCCTTCCTGTAT  
GATCTCTTAGAACTGCTATACCCTCCTGTTCCACTAACTGAGCTCTGAAAGGCTGCCAG  
TGGTGGGAGGTACATGGGTAA

>960

TATTATTTTCGCTGTCTCCTTCCTGTATGATCTCTTAGAACTGCTATACCCTCCTGTTCCA  
CTAACTGAGCTCTGAAAGGCTGCCAGTGGTGGGAGGTACATGGGTAAAGAGGGAGAT  
GAGGGAGTAAGATTTAGCAATG

>961

CCTTCCTGTATGATCTCTTAGAACTGCTATACCCTCCTGTTCCACTAACTGAGCTCTGAA  
AGGCTGCCAGTGGTGGGAGGTACATGGGTAAAGAGGGAGATGAGGGAGTAAGATTTA  
GCAATGGAATTCCATGCAAAGGC

>962

ATGATCTCTTAGAACTGCTATACCCTCCTGTTCCACTAACTGAGCTCTGAAAGGCTGCC  
AGTGGTGGGAGGTACATGGGTAAAGAGGGAGATGAGGGAGTAAGATTTAGCAATGGA  
ATTCCATGCAAAGGCCAGCTCATC

>963

CTGCTATACCCTCCTGTTCCACTAACTGAGCTCTGAAAGGCTGCCAGTGGTGGGAGGT  
ACATGGGTAAAGAGGGAGATGAGGGAGTAAGATTTAGCAATGGAATTCATGCAAAGG  
CCAGCTCATCTATTCTCTGTCTC

>964

CTGAGCTCTGAAAGGCTGCCAGTGGTGGGAGGTACATGGGTAAAGAGGGAGATGAGG  
GAGTAAGATTTAGCAATGGAATTCATGCAAAGGCCAGCTCATCTATTCTCTGTCTCT  
AGCATGATCTCCCCCTAAGATTGA

>965

AGTGGTGGGAGGTACATGGGTAAAGAGGGAGATGAGGGAGTAAGATTTAGCAATGGA  
ATTCCATGCAAAGGCCAGCTCATCTATTCTCTGTCTCTAGCATGATCTCCCCCTAAGAT  
TGAGATCTCCTGTATTTTTAGAA

>966

TGGGAGGTACATGGGTAAAGAGGGAGATGAGGGAGTAAGATTTAGCAATGGAATTCCA  
TGCAAAGGCCAGCTCATCTATTCTCTGTCTCTAGCATGATCTCCCCCTAAGATTGAGAT  
CTCCTGTATTTTTAGAACTGAT

>967

GAGATGAGGGAGTAAGATTTAGCAATGGAATTCATGCAAAGGCCAGCTCATCTATTCC  
TCTGTCTCTAGCATGATCTCCCCCTAAGATTGAGATCTCCTGTATTTTTAGAACTGATAC  
CCAGGTTCCCTTAAAAGACG

>968

AATGGAATTCATGCAAAGGCCAGCTCATCTATTCTCTGTCTCTAGCATGATCTCCCCC  
TAAGATTGAGATCTCCTGTATTTTTAGAACTGATACCCAGGTTCCCTTAAAAGACGCTT  
CAAGAAAAAATGTAAAAGAA

>969

AGGCCAGCTCATCTATTCTCTGTCTCTAGCATGATCTCCCCCTAAGATTGAGATCTCCT  
GTATTTTTAGAACTGATACCCAGGTTCCCTTAAAAGACGCTTCAAGAAAAAATGTAAA  
AGAAAAATCACTCTAAATACA

>970

TATTCCTCTGTCTCTAGCATGATCTCCCCCTAAGATTGAGATCTCCTGTATTTTTAGAACT  
GATACCCAGGTTCCCTTAAAAGACGCTTCAAGAAAAAATGTAAAAGAAAAATCACTC  
TAAATACACGAACATGAGAGA

>971

AGATCTCCTGTATTTTTAGAACTGATACCCAGGTTCCCTTAAAAGACGCTTCAAGAAA  
AAATGTAAAAGAAAAATCACTCTAAATACACGAACATGAGAGAGACAGAAAGAGAGC  
GGCATGTGCGCGGAGAGAGATT

>972

CAGGTTCCCTTAAAAGACGCTTCAAGAAAAAATGTAAAAGAAAAATCACTCTAAATA  
CACGAACATGAGAGAGACAGAAAGAGAGCGGGCATGTGCGCGGAGAGAGATTGAG  
TATTCTTTGTAATTTCCATCCTGC

>973

AAGACGCTTCAAGAAAAAATGTAAAAGAAAAATCACTCTAAATACACGAACATGAGA

GAGACAGAAAGAGAGCGGGCATGTGCGCGGAGAGAGATTGAGTATTCTCTTGAATT  
TTCCATCCTGCTTGTITTTAGGTGC

>974

GTAAAAGAAAAATCACTCTAAATACACGAACATGAGAGAGACAGAAAGAGAGCGGGC  
ATGTGCGCGGAGAGAGATTGAGTATTCTCTTGAATTTCCATCCTGCTTGTITTTAGG  
TGCTGCCATATGAAATCTCTGAA

>975

AAAAGAAAAATCACTCTAAATACACGAACATGAGAGAGACAGAAAGAGAGCGGGCAT  
GTGCGCGGAGAGAGATTGAGTATTCTCTTGAATTTCCATCCTGCTTGTITTTAGGTG  
CTGCCATATGAAATCTCTGAACT

>976

AGAGAGCGGGCATGTGCGCGGAGAGAGATTGAGTATTCTCTTGAATTTCCATCCTG  
CTTGTITTTAGGTGCTGCCATATGAAATCTCTGAACTGAGGAGTCTCATCAGCCTCCC  
AGGACCCAAGGACATAGCTCTG

>977

TTGAGTATTCTCTTGAATTTCCATCCTGCTTGTITTTAGGTGCTGCCATATGAAATCTC  
TGAAGTGAAGGAGTCTCATCAGCCTCCCAGGACCCAAGGACATAGCTCTGGCTATAAA  
TGGTGCCAGTTTTGGTGGGGG

>978

AGTATTCTCTTGAATTTCCATCCTGCTTGTITTTAGGTGCTGCCATATGAAATCTCTGA  
ACTGAGGAGTCTCATCAGCCTCCCAGGACCCAAGGACATAGCTCTGGCTATAAATGG  
TGCCAGTTTTGGTGGGGGAGC

>979

TTTAGGTGCTGCCATATGAAATCTCTGAACTGAGGAGTCTCATCAGCCTCCCAGGACC  
CAAGGACATAGCTCTGGCTATAAATGGTCCAGTTTTGGTGGGGGAGCTGCTGCTGCTT  
TATCTGGGCCCAATAAACCTTA

>980

CTCTGAACTGAGGAGTCTCATCAGCCTCCCAGGACCCAAGGACATAGCTCTGGCTAT  
AAATGGTCCAGTTTTGGTGGGGGAGCTGCTGCTTTATCTGGGCCCAATAAACCTT  
ATCAAAGTCTGTGCAGCCAGCC

>981

GTCTCATCAGCCTCCCAGGACCCAAGGACATAGCTCTGGCTATAAATGGTCCAGTTT  
TGGTGGGGGAGCTGCTGCTGCTTTATCTGGGCCCAATAAACCTTATCAAAGTCTGTGC  
AGCCAGCCTCAGCGCTAAGTG

>982

TGCCAGTTTTGGTGGGGGAGCTGCTGCTGCTTTATCTGGGCCCAATAAACCTTATCAAA  
CTGCTGTGCAGCCAGCCTCAGCGCTAAGTGAAATGCTTGGAGCCCAATGCTGGCAT  
TCAGCCACAGCCTCGCCTGCCT

>983

AGTTTTGGTGGGGGAGCTGCTGCTGCTTTATCTGGGCCCAATAAACCTTATCAAAGTGC  
TGTGCAGCCAGCCTCAGCGCTAAGTGAAATGCTTGGAGCCCAATGCTGGCATTGAG  
CCCACAGCCTCGCCTGCCTTCTT

>984

ATCTGGGCCCAATAAACCTTATCAAAGTCTGTGCAGCCAGCCTCAGCGCTAAGTGG  
AAATGCTTGGAGCCCAATGCTGGCATTGAGCCACAGCCTCGCCTGCCTTCTCCTTTT  
TGTTACCTTCTCCACCTCTTAAA



>985

TTATCAAAGTGTGTCAGCCAGCCTTCAGCGCTAAGTGGAAATGCTTGGAGCCCAAT  
GCTGGCATTACAGCCACAGCCTCGCCTGCCTTCTCCTTTTGTACCTTCTCCACCTCT  
TAAATTCAGGCATTAATCTCTC

>986

ACTGCTGTGTCAGCCAGCCTTCAGCGCTAAGTGGAAATGCTTGGAGCCCAATGCTGGCA  
TTCAGCCACAGCCTCGCCTGCCTTCTCCTTTTGTACCTTCTCCACCTCTTAAATTC  
AGGCATTAATCTCTCTTTAACA

>987

TGCTGGCATTACAGCCACAGCCTCGCCTGCCTTCTCCTTTTGTACCTTCTCCACCTC  
TTAAATTCAGGCATTAATCTCTCTTTAACACTTACTAACAAGGGCTGGGCTTTAATGGG  
CAGCGTTTATGAAGCAAGGG

>988

TCTTCCTTTTGTACCTTCTCCACCTCTTAAATTCAGGCATTAATCTCTCTTTAACACTT  
ACTAACAAGGGCTGGGCTTTAATGGGCAGCGTTTATGAAGCAAGGGAGATTTTACA  
TAGAGTGAATATGGCACGGGG

>989

CCACCTCTTAAATTCAGGCATTAATCTCTCTTTAACACTTACTAACAAGGGCTGGGCTTT  
TAATGGGCAGCGTTTATGAAGCAAGGGAGATTTTACATAGAGTGAATATGGCACGGG  
GGTGGGGAGGCCAGGGCCATAG

>990

ATTCAGGCATTAATCTCTCTTTAACACTTACTAACAAGGGCTGGGCTTTAATGGGCAG  
CGTTTATGAAGCAAGGGAGATTTTACATAGAGTGAATATGGCACGGGGGTGGGGAGG  
CCAGGGCCATAGAGGATTGTGCT

>991

TTAACACTTACTAACAAGGGCTGGGCTTTAATGGGCAGCGTTTATGAAGCAAGGGAG  
ATTTTACATAGAGTGAATATGGCACGGGGGTGGGGAGGCCAGGGCCATAGAGGATTG  
TGCTTTCTCTCCATTGTTTCCAG

>992

TTTTAATGGGCAGCGTTTATGAAGCAAGGGAGATTTTACATAGAGTGAATATGGCACG  
GGGGTGGGGAGGCCAGGGCCATAGAGGATTGTGCTTTCTCTCCATTGTTTCCAGAGA  
TTCTCTTTCTCTGATTTGAGG

>993

ATGGGCAGCGTTTATGAAGCAAGGGAGATTTTACATAGAGTGAATATGGCACGGGGG  
TGGGGAGGCCAGGGCCATAGAGGATTGTGCTTTCTCTCCATTGTTTCCAGAGATTCTC  
TCTTTCTCTGATTTGAGGATTA

>994

AGTGAATATGGCACGGGGGTGGGGAGGCCAGGGCCATAGAGGATTGTGCTTTCTCTCC  
CATTGTTTCCAGAGATTCTCTTTCTCTGATTTGAGGATTAATAGGAGATTAGGATCAG  
GGGTTAATTGTGTGCTTCTCCT

>995

GGCCAGGGCCATAGAGGATTGTGCTTTCTCTCCATTGTTTCCAGAGATTCTCTTTCT  
CTGATTTGAGGATTAATAGGAGATTAGGATCAGGGGTTAATTGTGTGCTTCTCTGCTAC  
TGCACTGAGGAGAGGCTGGT

>996

CATAGAGGATTGTGCTTTCTCTCCATTGTTTCCAGAGATTCTCTTTCTCTGATTTGA

GGATTAATAGGAGATTAGGATCAGGGGTTAATTGTGTGCTTCTCCTGCTACTGCACTGA  
GGAGAGGCTGGTAGGTGGATG

>997

TCTGATTTGAGGATTAATAGGAGATTAGGATCAGGGGTTAATTGTGTGCTTCTCCTGCTA  
CTGCACTGAGGAGAGGCTGGTAGGTGGATGTGGACAGCAAAGCGGAAACCTACAGCA  
GGCACTATCTAGGCAGAAGCTCA

>998

GATTTGAGGATTAATAGGAGATTAGGATCAGGGGTTAATTGTGTGCTTCTCCTGCTACTG  
CACTGAGGAGAGGCTGGTAGGTGGATGTGGACAGCAAAGCGGAAACCTACAGCAGGC  
ACTATCTAGGCAGAAGCTCAACA

>999

GGATCAGGGGTTAATTGTGTGCTTCTCCTGCTACTGCACTGAGGAGAGGCTGGTAGGT  
GGATGTGGACAGCAAAGCGGAAACCTACAGCAGGCACTATCTAGGCAGAAGCTCAAC  
AAGTGTAGTGATTCTTTCTTCTGTT

>1000

GTGCTTCTCCTGCTACTGCACTGAGGAGAGGCTGGTAGGTGGATGTGGACAGCAAAGC  
GGAAACCTACAGCAGGCACTATCTAGGCAGAAGCTCAACAAGTGTAGTGATTCTTTCT  
TCTGTTTCCCTGGTGAGGCACCAG

>1001

CTTCTCCTGCTACTGCACTGAGGAGAGGCTGGTAGGTGGATGTGGACAGCAAAGCGG  
AAACCTACAGCAGGCACTATCTAGGCAGAAGCTCAACAAGTGTAGTGATTCTTTCTTCT  
GTTTCCCTGGTGAGGCACCAGGAG

>1002

ACTGCACTGAGGAGAGGCTGGTAGGTGGATGTGGACAGCAAAGCGGAAACCTACAGC  
AGGCACTATCTAGGCAGAAGCTCAACAAGTGTAGTGATTCTTTCTTCTGTTTCCCTGGT  
GAGGCACCAGGAGGGTCTTTTCTC

>1003

GCTGGTAGGTGGATGTGGACAGCAAAGCGGAAACCTACAGCAGGCACTATCTAGGCA  
GAAGCTCAACAAGTGTAGTGATTCTTTCTTCTGTTTCCCTGGTGAGGCACCAGGAGGG  
TCTTTTCTCCTCTCCTTACATCCCT

>1004

CCTACAGCAGGCACTATCTAGGCAGAAGCTCAACAAGTGTAGTGATTCTTTCTTCTGTT  
TCCCTGGTGAGGCACCAGGAGGGTCTTTTCTCCTCTCCTTACATCCCTCCACTCTTGCT  
CTCCTTGAGCCAGTTCTTTC

>1005

CAGGCACTATCTAGGCAGAAGCTCAACAAGTGTAGTGATTCTTTCTTCTGTTTCCCTGG  
TGAGGCACCAGGAGGGTCTTTTCTCCTCTCCTTACATCCCTCCACTCTTGCTCTCCTTG  
CAGCCAGTTCTTTCTAACTT

>1006

TTCCTGGTGAGGCACCAGGAGGGTCTTTTCTCCTCTCCTTACATCCCTCCACTCTTGCT  
TCTCCTTGAGCCAGTTCTTTCTAACTTCTTTAAATCCCTTCTAACAGGGTGT  
ATAGACCTTAGTTAGAAAAAC

>1007

TGGTGAGGCACCAGGAGGGTCTTTTCTCCTCTCCTTACATCCCTCCACTCTTGCTCTCC  
TTGAGCCAGTTCTTTCTAACTTCTTTAAATCCCTTCTAACAGGGTGTATAGA  
CCTTAGTTAGAAAAACAGGTA

>1008

TCCCTCCACTCTTGCTCTCCTTGCAGCCCAGTTCTTTCCTAACTTTCTTTAAATCCCTTT  
CCTCTAACAGGGTGTATAGACCTTAGTTAGAAAAACAGGTAGTCTCTAAATGGGATTGC  
TCTTTATTGTTAATGAAATGA

>1009

CTCCTTGCAGCCCAGTTCTTTCCTAACTTTCTTTAAATCCCTTTCTCTAACAGGGTGT  
TAGACCTTAGTTAGAAAAACAGGTAGTCTCTAAATGGGATTGCTCTTTATTGTTAATGA  
AATGAATACCCAGGGACTGGG

>1010

TTGCAGCCCAGTTCTTTCCTAACTTTCTTTAAATCCCTTTCTCTAACAGGGTGTATAGA  
CCTTAGTTAGAAAAACAGGTAGTCTCTAAATGGGATTGCTCTTTATTGTTAATGAAATG  
AATACCCAGGGACTGGGCTTC

>1011

CAGTTCTTTCCTAACTTTCTTTAAATCCCTTTCTCTAACAGGGTGTATAGACCTTAGTT  
AGAAAAACAGGTAGTCTCTAAATGGGATTGCTCTTTATTGTTAATGAAATGAATACCCA  
GGGACTGGGCTTCCCCTCCGC

>1012

GACCTTAGTTAGAAAAACAGGTAGTCTCTAAATGGGATTGCTCTTTATTGTTAATGAAA  
TGAATACCCAGGGACTGGGCTTCCCCTCCGCTTGCCTGGGTTTGATGTGGTTGTATCC  
CGTGCTATCAGAGGAGCCCTTC

>1013

TGAATACCCAGGGACTGGGCTTCCCCTCCGCTTGCCTGGGTTTGATGTGGTTGTATCC  
CGTGCTATCAGAGGAGCCCTTCTTCACTCAAGTGTGTTCCCCTGCCAGCTCTCTCCG  
CAGACTCCTGCTGGGCTGAGCT

>1014

AATACCCAGGGACTGGGCTTCCCCTCCGCTTGCCTGGGTTTGATGTGGTTGTATCCCG  
TGCTATCAGAGGAGCCCTTCTTCACTCAAGTGTGTTCCCCTGCCAGCTCTCTCCGCA  
GACTCCTGCTGGGCTGAGCTTT

>1015

CCCCTCCGCTTGCCTGGGTTTGATGTGGTTGTATCCCGTGCTATCAGAGGAGCCCTTC  
CTTCACTCAAGTGTGTTCCCCTGCCAGCTCTCTCCGCAGACTCCTGCTGGGCTGAGC  
TTTCCCTGCTCTAAGAGTCAGG

>1016

GGTTTGATGTGGTTGTATCCCGTGCTATCAGAGGAGCCCTTCTTCACTCAAGTGTGTT  
CCCCTGCCAGCTCTCTCCGCAGACTCCTGCTGGGCTGAGCTTCCCTGCTCTAAGAG  
TCAGGAGTGGCTCTTGCTGGGA

>1017

AGAGGAGCCCTTCTTCACTCAAGTGTGTTCCCCTGCCAGCTCTCTCCGCAGACTCC  
TGCTGGGCTGAGCTTCCCTGCTCTAAGAGTCAGGAGTGGCTCTTGCTGGGATGGAA  
TGACCCGCTTTGGGGCTGCCTCA

>1018

ACTCAAGTGTGTTCCCCTGCCAGCTCTCTCCGCAGACTCCTGCTGGGCTGAGCTTTC  
CCTGCTCTAAGAGTCAGGAGTGGCTCTTGCTGGGATGGAATGACCCGCTTTGGGGC  
TGCCTCATGAGCGGCTCTTGTA

>1019

CCCTGCTCTAAGAGTCAGGAGTGGCTCTTGCTGGGATGGAATGACCCGCTTTGGGG

CTGCCTCATGAGCGGCTCTTGTGAACCCGGATCAGTTCCGATGTGTAACTCTACCGCC  
TGGCCTTCAGCGAACAGATACAG

>1020

GGCTCTTGCTGGGATGGAATGACCCGTCTTTGGGGCTGCCTCATGAGCGGCTCTTGTG  
AACCCGGATCAGTTCCGATGTGTAACTCTACCGCCTGGCCTTCAGCGAACAGATACA  
GATTCTGCCACCTTCCATGACCC

>1021

GCTGCCTCATGAGCGGCTCTTGTGAACCCGGATCAGTTCCGATGTGTAACTCTACCGC  
CTGGCCTTCAGCGAACAGATACAGATTTCTGCCACCTTCCATGACCCTACAGTTCATGG  
GACTGGGTCTGGGGCAGTGCCA

>1022

CATGAGCGGCTCTTGTGAACCCGGATCAGTTCCGATGTGTAACTCTACCGCCTGGCCT  
TCAGCGAACAGATACAGATTTCTGCCACCTTCCATGACCCTACAGTTCATGGGACTGGG  
TCTGGGGCAGTGCCAGAGGCAC

>1023

ATGTGTAACTCTACCGCCTGGCCTTCAGCGAACAGATACAGATTTCTGCCACCTTCCA  
TGACCCTACAGTTCATGGGACTGGGTCTGGGGCAGTGCCAGAGGCACGCATGGAGGT  
GTGATTCTAGGTGAGTCCTGCGGA

>1024

TTCAGCGAACAGATACAGATTTCTGCCACCTTCCATGACCCTACAGTTCATGGGACTGG  
GTCTGGGGCAGTGCCAGAGGCACGCATGGAGGTGTGATTCTAGGTGAGTCCTGCGGA  
AAACCTCTGGCCACCCGTGAGTC

>1025

GAACAGATACAGATTTCTGCCACCTTCCATGACCCTACAGTTCATGGGACTGGGTCTGG  
GGCAGTGCCAGAGGCACGCATGGAGGTGTGATTCTAGGTGAGTCCTGCGGAAAACCT  
CTGGCCACCCGTGAGTCACGGAC

>1026

CCATGACCCTACAGTTCATGGGACTGGGTCTGGGGCAGTGCCAGAGGCACGCATGGAG  
GTGTGATTCTAGGTGAGTCCTGCGGAAAACCTCTGGCCACCCGTGAGTCACGGACAG  
AACATGCAGACTCGGGCCTTGGTG

>1027

ACCCTACAGTTCATGGGACTGGGTCTGGGGCAGTGCCAGAGGCACGCATGGAGGTGT  
GATTCTAGGTGAGTCCTGCGGAAAACCTCTGGCCACCCGTGAGTCACGGACAGAACA  
TGCACTCGGGCCTTGGTGACATA

>1028

AGTGCCAGAGGCACGCATGGAGGTGTGATTCTAGGTGAGTCCTGCGGAAAACCTCTG  
GCCACCCGTGAGTCACGGACAGAACATGCAGACTCGGGCCTTGGTGACATAAGCTCC  
GCATTGCTAAAACCGGTGACCTCG

>1029

GCACGCATGGAGGTGTGATTCTAGGTGAGTCCTGCGGAAAACCTCTGGCCACCCGTG  
AGTCACGGACAGAACATGCAGACTCGGGCCTTGGTGACATAAGCTCCGCATTGCTAAA  
ACCGGTGACCTCGAGGGCTGACT

>1030

CTGCGGAAAACCTCTGGCCACCCGTGAGTCACGGACAGAACATGCAGACTCGGGCC  
TTGGTGACATAAGCTCCGCATTGCTAAAACCGGTGACCTCGAGGGCTGACTGGCCTG  
AGAACCCTGGATGGCGCTCTCGGCC

>1031

ACGGACAGAACATGCAGACTCGGGCCTTGGTGACATAAGCTCCGCATTGCTAAAACCG  
CGTGACCTCGAGGGCTGACTGGCCTGAGAACCCTGGATGGCGCTCTCGGCCACCCCC  
ACCTCCACCCCAACCTCCTGGGCT

>1032

GACTCGGGCCTTGGTGACATAAGCTCCGCATTGCTAAAACCGCGTGACCTCGAGGGCT  
GACTGGCCTGAGAACCCTGGATGGCGCTCTCGGCCACCCCCACCTCCACCCCAACCT  
CCTGGGCTTCGGTCAGAATCCACA

>1033

GGCCTGAGAACCCTGGATGGCGCTCTCGGCCACCCCCACCTCCACCCCAACCTCCTG  
GGCTTCGGTCAGAATCCACAGCCCGTGCCCGAAGAGCGCTTCCCGCCTCTGGCACCT  
ACCTTCGCTCAGCTCCAGGGAAAA

>1034

ACCCTGGATGGCGCTCTCGGCCACCCCCACCTCCACCCCAACCTCCTGGGCTTCGGT  
CAGAATCCACAGCCCGTGCCCGAAGAGCGCTTCCCGCCTCTGGCACCTACCTTCGCT  
CAGCTCCAGGGAAAAGGGGAGAGG

>1035

CTCTCGGCCACCCCCACCTCCACCCCAACCTCCTGGGCTTCGGTCAGAATCCACAGC  
CCGTGCCCGAAGAGCGCTTCCCGCCTCTGGCACCTACCTTCGCTCAGCTCCAGGGAA  
AAGGGGAGAGGGCAGCTTTCTGCA

>1036

GGCTTCGGTCAGAATCCACAGCCCGTGCCCGAAGAGCGCTTCCCGCCTCTGGCACCT  
ACCTTCGCTCAGCTCCAGGGAAAAGGGGAGAGGGCAGCTTTCTGCAGTCAGAGGAAG  
AGTACATTTCTTTGGCTGCTCTAC

>1037

GGTCAGAATCCACAGCCCGTGCCCGAAGAGCGCTTCCCGCCTCTGGCACCTACCTTC  
GCTCAGTCCAGGGAAAAGGGGAGAGGGCAGCTTTCTGCAGTCAGAGGAAGAGTACA  
TTTTCTTTGGCTGCTCTACCCTCTG

>1038

ATCCACAGCCCGTGCCCGAAGAGCGCTTCCCGCCTCTGGCACCTACCTTCGCTCAGC  
TCCAGGGAAAAGGGGAGAGGGCAGCTTTCTGCAGTCAGAGGAAGAGTACATTTCTT  
TGGCTGCTCTACCCTCTGAAGTAGG

>1039

GCGTTCCCGCCTCTGGCACCTACCTTCGCTCAGCTCCAGGGAAAAGGGGAGAGGG  
CAGCTTTCTGCAGTCAGAGGAAGAGTACATTTCTTTGGCTGCTCTACCCTCTGAAGTA  
GGGCGGCCAGCTGAAGGAGGACAC

>1040

AAAGGGGAGAGGGCAGCTTTCTGCAGTCAGAGGAAGAGTACATTTCTTTGGCTGCTC  
TACCCTCTGAAGTAGGGCGGCCAGCTGAAGGAGGACACACTTTTGAGGGGCCAGAG  
GTTGTCCAAGCTTCCCCCTGCCCC

>1041

GGGGAGAGGGCAGCTTTCTGCAGTCAGAGGAAGAGTACATTTCTTTGGCTGCTCTAC  
CCTCTGAAGTAGGGCGGCCAGCTGAAGGAGGACACACTTTTGAGGGGCCAGAGGTT  
GTCCAAGCTTCCCCCTGCCCCCTGA

>1042

GAGTACATTTCTTTGGCTGCTCTACCCTCTGAAGTAGGGCGGCCAGCTGAAGGAGGA

CACACTTTTGAGGGGCCAGAGGTTGTCCAAGCTTCCCCCTGCCCCCTGAAGACTGTG  
CACTGAGCTGGGCGCAGTTCTCGG

>1043

TTTCTTTGGCTGCTCTACCCTCTGAAGTAGGGCGGCCAGCTGAAGGAGGACACACTTT  
TGAGGGGCCAGAGGTTGTCCAAGCTTCCCCCTGCCCCCTGAAGACTGTGCACTGAG  
CTGGGCGCAGTTCTCGGAACTGTT

>1044

TCTTTGGCTGCTCTACCCTCTGAAGTAGGGCGGCCAGCTGAAGGAGGACACACTTTTG  
AGGGGCCAGAGGTTGTCCAAGCTTCCCCCTGCCCCCTGAAGACTGTGCACTGAGCT  
GGGCGCAGTTCTCGGAACTGTTTC

>1045

CTCTACCCTCTGAAGTAGGGCGGCCAGCTGAAGGAGGACACACTTTTGAGGGGCCCA  
GAGGTTGTCCAAGCTTCCCCCTGCCCCCTGAAGACTGTGCACTGAGCTGGGCGCAGTT  
CTCGGAACTGTTTCCACCCAGATT

>1046

CGGCCAGCTGAAGGAGGACACACTTTTGAGGGGCCAGAGGTTGTCCAAGCTTCCCC  
CTGCCCCCTGAAGACTGTGCACTGAGCTGGGCGCAGTTCTCGGAACTGTTTCCACCC  
AGATTGCTGGGGGGCGGGGGGGGT

>1047

TTTTGAGGGGCCAGAGGTTGTCCAAGCTTCCCCCTGCCCCCTGAAGACTGTGCACTG  
AGCTGGGCGCAGTTCTCGGAACTGTTTCCACCCAGATTGCTGGGGGGCGGGGGGGG  
GTGGGATGAGGGCAGAGCCGAGAGG

>1048

AAGCTTCCCCCTGCCCCCTGAAGACTGTGCACTGAGCTGGGCGCAGTTCTCGGAACT  
GTTTCCACCCAGATTGCTGGGGGGCGGGGGGGGTGGGATGAGGGCAGAGCCGAGAG  
GCTGTCCAAGGTTTGGGAGAGAGAA

>1049

CTGAGCTGGGCGCAGTTCTCGGAACTGTTTCCACCCAGATTGCTGGGGGGCGGGGG  
GGGGTGGGATGAGGGCAGAGCCGAGAGGCTGTCCAAGGTTTGGGAGAGAGAAAAGT  
TTCTCCAGGACTCGACCTTGGCCTCC

>1050

CTGGGCGCAGTTCTCGGAACTGTTTCCACCCAGATTGCTGGGGGGCGGGGGGGGGT  
GGGATGAGGGCAGAGCCGAGAGGCTGTCCAAGGTTTGGGAGAGAGAAAAGTTTCTCC  
CAGGACTCGACCTTGGCCTCCAGCAA

>1051

GGGCGCAGTTCTCGGAACTGTTTCCACCCAGATTGCTGGGGGGCGGGGGGGGGTGG  
GATGAGGGCAGAGCCGAGAGGCTGTCCAAGGTTTGGGAGAGAGAAAAGTTTCTCCA  
GACTCGACCTTGGCCTCCAGCAATC

>1052

CAGTTCTCGGAACTGTTTCCACCCAGATTGCTGGGGGGCGGGGGGGGGTGGGATGA  
GGGCAGAGCCGAGAGGCTGTCCAAGGTTTGGGAGAGAGAAAAGTTTCTCCAGGACT  
CGACCTTGGCCTCCAGCAATCGCGAC

>1053

ACTGTTTCCACCCAGATTGCTGGGGGGCGGGGGGGGGTGGGATGAGGGCAGAGCCGA  
GAGGCTGTCCAAGGTTTGGGAGAGAGAAAAGTTTCTCCAGGACTCGACCTTGGCCT  
CCAGCAATCGCGACAGCTAAAAACGG

>1054

GCTGGGGGGCGGGGGGGGGTGGGATGAGGGCAGAGCCGAGAGGCTGTCCAAGGTTT  
GGGAGAGAGAAAAGTTTCTCCAGGACTCGACCTTGGCCTCCAGCAATCGCGACAGC  
TAAAAACGGGTGTCTCGCTTCGACAAT

>1055

CAGAGCCGAGAGGCTGTCCAAGGTTTGGGAGAGAGAAAAGTTTCTCCAGGACTCGA  
CCTTGGCCTCCAGCAATCGCGACAGCTAAAAACGGGTGTCTCGCTTCGACAATAGATC  
CCCGCGGACCTTCTGGCACCTGGTT

>1056

GCTGTCCAAGGTTTGGGAGAGAGAAAAGTTTCTCCAGGACTCGACCTTGGCCTCCA  
GCAATCGCGACAGCTAAAAACGGGTGTCTCGCTTCGACAATAGATCCCCGCGGACCTT  
CTGGCACCTGGTTCACTAGCGCCCG

>1057

TCTCCAGGACTCGACCTTGGCCTCCAGCAATCGCGACAGCTAAAAACGGGTGTCTCG  
CTTCGACAATAGATCCCCGCGGACCTTCTGGCACCTGGTTCACTAGCGCCCGGAACT  
CTGCCTCGGGAGACTTATTGAAAT

>1058

CGACAGCTAAAAACGGGTGTCTCGCTTCGACAATAGATCCCCGCGGACCTTCTGGCAC  
CTGTTCACTAGCGCCCGGAACTCTGCCTCGGGAGACTTATTGAAATCCGGATGCTC  
AAGCCGGGAGGCGCGCAGTAACCA

>1059

CTTCGACAATAGATCCCCGCGGACCTTCTGGCACCTGGTTCACTAGCGCCCGGAACT  
CTGCCTCGGGAGACTTATTGAAATCCGGATGCTCAAGCCGGGAGGCGCGCAGTAACCA  
GGAGGATGAGAGGGCCGGTTTGG

>1060

TTCTGGCACCTGGTTCACTAGCGCCCGGAACTCTGCCTCGGGAGACTTATTGAAATCC  
GGATGCTCAAGCCGGGAGGCGCGCAGTAACCAGGAGGATGAGAGGGCCGGTTTGGG  
CTAGGAAAGCGGCCTTTTAAAACA

>1061

ACCTGGTTCACTAGCGCCCGGAACTCTGCCTCGGGAGACTTATTGAAATCCGGATGC  
TCAAGCCGGGAGGCGCGCAGTAACCAGGAGGATGAGAGGGCCGGTTTGGGCTAGGA  
AAGCGGCCTTTTAAAACAGATGTCA

>1062

GCCCAGGAACTCTGCCTCGGGAGACTTATTGAAATCCGGATGCTCAAGCCGGGAGGCG  
CGCAGTAACCAGGAGGATGAGAGGGCCGGTTTGGGCTAGGAAAGCGGCCTTTTAAA  
ACAGATGTCAGGGGGACTGCAGCCC

>1063

TTGAAATCCGGATGCTCAAGCCGGGAGGCGCGCAGTAACCAGGAGGATGAGAGGGCC  
GGGTTTGGGCTAGGAAAGCGGCCTTTTAAAACAGATGTCAGGGGGACTGCAGCCCCG  
AGCCATGAGAAAAAAGTTAAAGGCGA

>1064

ATCCGGATGCTCAAGCCGGGAGGCGCGCAGTAACCAGGAGGATGAGAGGGCCGGTT  
TGGGCTAGGAAAGCGGCCTTTTAAAACAGATGTCAGGGGGACTGCAGCCCCGAGCCA  
TGAGAAAAAAGTTAAAGGCGAGATGA

>1065

CGGGAGGCGCGCAGTAACCAGGAGGATGAGAGGGCCGGTTTGGGCTAGGAAAGCG

GCCTTTTAAACAGATGTCAGGGGGACTGCAGCCCCGAGCCATGAGAAAAAAGTTAA  
AGGCGAGATGACACGCACTGAATTGGG

>1066

CAGGAGGATGAGAGGGCCGGTTTGGGCTAGGAAAGCGGCCTTTTAAACAGATGTC  
AGGGGGACTGCAGCCCCGAGCCATGAGAAAAAAGTTAAAGGCGAGATGACACGCACT  
GAATTGGGGCAAACATTGGAAGAGGA

>1067

TTTGGGCTAGGAAAGCGGCCTTTTAAACAGATGTCAGGGGGACTGCAGCCCCGAGC  
CATGAGAAAAAAGTTAAAGGCGAGATGACACGCACTGAATTGGGGCAAACATTGGAA  
GAGGAGACAAAACCTGCGTGCTTGAGC

>1068

CTAGGAAAGCGGCCTTTTAAACAGATGTCAGGGGGACTGCAGCCCCGAGCCATGAG  
AAAAAAGTTAAAGGCGAGATGACACGCACTGAATTGGGGCAAACATTGGAAGAGGAG  
ACAAAACCTGCGTGCTTGAGCACCGGG

>1069

AAAGCGGCCTTTTAAACAGATGTCAGGGGGACTGCAGCCCCGAGCCATGAGAAAAA  
AGTTAAAGGCGAGATGACACGCACTGAATTGGGGCAAACATTGGAAGAGGAGACAAA  
ACTGCGTGCTTGAGCACCGGGGTGCG

>1070

GCAGCCCCGAGCCATGAGAAAAAAGTTAAAGGCGAGATGACACGCACTGAATTGGGG  
CAAACATTGGAAGAGGAGACAAAACCTGCGTGCTTGAGCACCGGGGTGCGGGGAGGG  
GGGGACAAAACCCGTATCCAGTGCAA

>1071

GTTAAAGGCGAGATGACACGCACTGAATTGGGGCAAACATTGGAAGAGGAGACAAAA  
CTGCGTGCTTGAGCACCGGGGTGCGGGGAGGGGGGACAAAACCCGTATCCAGTGCA  
AATTAATCTTGGGAGTAGGTGGGG

>1072

ACGCACTGAATTGGGGCAAACATTGGAAGAGGAGACAAAACCTGCGTGCTTGAGCACC  
GGGGTGCGGGGAGGGGGGACAAAACCCGTATCCAGTGCAAATTAATCTTGGGAG  
TAGGTGGGGGCTGCTGCGCGCCCTTC

>1073

TGGAAGAGGAGACAAAACCTGCGTGCTTGAGCACCGGGGTGCGGGGAGGGGGGACA  
AAACCCGTATCCAGTGCAAATTAATCTTGGGAGTAGGTGGGGGCTGCTGCGCGCCC  
TTCACCCTCAGTCCCCTATTAAGGA

>1074

GTGCTTGAGCACCGGGGTGCGGGGAGGGGGGACAAAACCCGTATCCAGTGCAAATT  
AAAATCTTGGGAGTAGGTGGGGGCTGCTGCGCGCCCTTACCCTCAGTCCCCTATTAA  
GGATTCTGAGTCCCCATGCACTCC

>1075

CTTGAGCACCGGGGTGCGGGGAGGGGGGACAAAACCCGTATCCAGTGCAAATTA  
ATCTTGGGAGTAGGTGGGGGCTGCTGCGCGCCCTTACCCTCAGTCCCCTATTAAGGA  
TTCTGAGTCCCCATGCACTCCTGT

>1076

AAAACCCGTATCCAGTGCAAATTAATCTTGGGAGTAGGTGGGGGCTGCTGCGCGCC  
CTTACCCTCAGTCCCCTATTAAGGATTCTGAGTCCCCATGCACTCCTGTCTCTGGCT  
CCTTCCTCCTCCTCGCTCGGC



>1077

AGTGCAAATTAATCTTGGGAGTAGGTGGGGGCTGCTGCGCGCCCTTACCCTCAGT  
TCCCCTATTAAGGATTCTGAGTCCCCATGCACTCCTGTCTCTGGCTCCTTCCTCCTCT  
CCGCTCGGCCGGTGAGAGGCGG

>1078

TAAAATCTTGGGAGTAGGTGGGGGCTGCTGCGCGCCCTTACCCTCAGTCCCCTATTA  
AGGATTCTGAGTCCCCATGCACTCCTGTCTCTGGCTCCTTCCTCCTCTCCGCTCGGC  
CGGTGAGAGGCGGCCGCCGGCG

>1079

ATTAAGGATTCTGAGTCCCCATGCACTCCTGTCTCTGGCTCCTTCCTCCTCTCCGCTC  
GGCCGGTGAGAGGCGGCCGCCGGCGCCCCAGCAGCAGCTAGATGTCAGGCGAAGCCC  
GGAGCGCGGAGCGCGGGGAAGGG

>1080

TAAGGATTCTGAGTCCCCATGCACTCCTGTCTCTGGCTCCTTCCTCCTCTCCGCTCG  
GCCGGTGAGAGGCGGCCGCCGGCGCCCCAGCAGCAGCTAGATGTCAGGCGAAGCCCG  
GAGCGCGGAGCGCGGGGAAGGGAG

>1081

TGCACTCCTGTCTCTGGCTCCTTCCTCCTCTCCGCTCGGCCGGTGAGAGGCGGCCG  
CCGGCGCCCCAGCAGCAGCTAGATGTCAGGCGAAGCCCGGAGCGCGGAGCGCGGGG  
AAGGGAGGGGAAGGGAGGGGAGGGGA

>1082

GCTCCTTCCTCCTCTCCGCTCGGCCGGTGAGAGGCGGCCGCCGGCGCCCCAGCAGCA  
GCTAGATGTCAGGCGAAGCCCGGAGCGCGGAGCGCGGGGAAGGGAGGGGAAGGGAG  
GGGAGGGGAAGGAGGGGTGGGGCGG

>1083

TCGGCCGGTGAGAGGCGGCCGCCGGCGCCCCAGCAGCAGCTAGATGTCAGGCGAAGC  
CCGGAGCGCGGAGCGCGGGGAAGGGAGGGGAAGGGAGGGGAGGGGAAGGAGGGG  
TGGGGCGGGGAGCGCGCGGGCTCGGC

>1084

AGAGGCGGCCGCCGCCGCCAGCAGCAGCTAGATGTCAGGCGAAGCCCGGAGCGCG  
GAGCGCGGGGAAGGGAGGGGAAGGGAGGGGAGGGGAAGGAGGGGTGGGGCGGGG  
AGCGCGCGGGGCTCGGCCAGTGCGGGG

>1085

GCGGCCGCCGCCGCCAGCAGCAGCTAGATGTCAGGCGAAGCCCGGAGCGCGGAGC  
GCGGGGAAGGGAGGGGAAGGGAGGGGAGGGGAAGGAGGGGTGGGGCGGGGAGCG  
CGCGCGGGGCTCGGCCAGTGCGGGGTGGT

>1086

CAGCTAGATGTCAGGCGAAGCCCGGAGCGCGGAGCGCGGGGAAGGGAGGGGAAGGG  
AGGGGAGGGGAAGGGAGGGGTGGGGCGGGGAGCGCGCGGGGCTCGGCCAGTGCG  
GGGTGGTGGGCGGGCTGAGCCCGGGGACG

>1087

GGGGAAGGGAGGGGAAGGGAGGGGAGGGGAAGGAGGGGTGGGGCGGGGAGCGCG  
CGCGGGGCTCGGCCAGTGCGGGGTGGTGGGCGGGGCTGAGCCCGGGGACGGCGCGGA  
GGGGGAGGGGAAGGGGGCAGCTGTGGGC

>1088

GAGGGGAAGGGAGGGGTGGGGCGGGGAGCGCGCGGGGCTCGGCCAGTGCGGGGTG

GTGGGCGGGCTGAGCCCGGGACGCGCGGGAGGGGGAGGGAAGGGGGCAGCT  
GTGGCAGGGAGCCGGCTCGGCCCCAG

>1089

GGCGGGGAGCGCGCGGGCTCGGCCAGTGCGGGGTGGTGGGCGGGCTGAGCCCGG  
GGACGGCGCGGGAGGGGGAGGGAAGGGGGCAGCTGTGGCAGGGAGCCGGGCT  
CGGCCGCCAGCACTAAAGATGGAGAGGCG

>1090

AGCGCGCGGGCTCGGCCAGTGCGGGGTGGTGGGCGGGCTGAGCCCGGGACGCG  
GCGGGAGGGGGAGGGAAGGGGGCAGCTGTGGCAGGGAGCCGGGCTCGGCCGCC  
AGCACTAAAGATGGAGAGGCGCCGGGGC

>1091

GCGCGGGCTCGGCCAGTGCGGGGTGGTGGGCGGGCTGAGCCCGGGACGCGCGGG  
AGGGGGGAGGGAAGGGGGCAGCTGTGGCAGGGAGCCGGGCTCGGCCGCCAGCAC  
TAAAGATGGAGAGGCGCCGGGGCCTTGC

>1092

TCGGCCAGTGCGGGGTGGTGGGCGGGCTGAGCCCGGGACGCGCGGGAGGGGGGA  
GGGAAGGGGGCAGCTGTGGCAGGGAGCCGGGCTCGGCCGCCAGCACTAAAGATG  
GAGAGGCGCCGGGGCCTTGCAGGGGAGG

>1093

CCCGGGGACGCGCGGGAGGGGGGAGGGAAGGGGGCAGCTGTGGCAGGGAGCC  
GGGCTCGGCCGCCAGCACTAAAGATGGAGAGGCGCCGGGGCCTTGCAGGGGAGGGG  
GCTCGGCGTTGACGTGGGACGCGGCGGAG

>1094

GGGAGGGGGAGGGAAGGGGGCAGCTGTGGCAGGGAGCCGGGCTCGGCCGCCAG  
CACTAAAGATGGAGAGGCGCCGGGGCCTTGCAGGGGAGGGGGCTCGGCGTTGACGTG  
GGACGCGGCGGAGGCGCAGCAGCCGGT

>1095

GAGGGGGAGGGAAGGGGGCAGCTGTGGCAGGGAGCCGGGCTCGGCCGCCAGCA  
CTAAAGATGGAGAGGCGCCGGGGCCTTGCAGGGGAGGGGGCTCGGCGTTGACGTGGG  
ACGCGGCGGAGGCGCAGCAGCCGGTGG

>1096

GGGAGCTGTGGCAGGGAGCCGGGCTCGGCCGCCAGCACTAAAGATGGAGAGGCG  
CCGGGGCCTTGCAGGGGAGGGGGCTCGGCGTTGACGTGGGACGCGGCGGAGGCGCA  
GCAGCCGGTGGTATTGCTAACCTCGC

>1097

CACTAAAGATGGAGAGGCGCCGGGGCCTTGCAGGGGAGGGGGCTCGGCGTTGACGTG  
GGACGCGGCGGAGGCGCAGCAGCCGGTGGTATTGCTAACCTCGCAGCAGAGAGGA  
GTTGAGGGCGATGAGAGCGGGTACTG

>1098

AGATGGAGAGGCGCCGGGGCCTTGCAGGGGAGGGGGCTCGGCGTTGACGTGGGACG  
CGGCGGAGGCGCAGCAGCCGGTGGTATTGCTAACCTCGCAGCAGAGAGGAGTTGA  
GGGCGATGAGAGCGGGTACTGCGAACT

>1099

TGGAGAGGCGCCGGGGCCTTGCAGGGGAGGGGGCTCGGCGTTGACGTGGGACGCGG  
CGGAGGCGCAGCAGCCGGTGGTATTGCTAACCTCGCAGCAGAGAGGAGTTGAGGG  
CGATGAGAGCGGGTACTGCGAACTGCC

>1100

GAGGGGGCTCGGCGTTGACGTGGGACGCGGCGGAGGCGCAGCAGCCGGTGGTGATTT  
GCTAACCTCGCAGCAGAGAGGAGTTGAGGGCGATGAGAGCGGGTACTGCGAACTGCC  
GGGCGATGCTGTCGCTGCCCGCTGA

>1101

TGACGTGGGACGCGGCGGAGGCGCAGCAGCCGGTGGTGATTTGCTAACCTCGCAGCA  
GAGAGGAGTTGAGGGCGATGAGAGCGGGTACTGCGAACTGCCGGGCGATGCTGTCGC  
TGCCGCCGTGATACGGAGAGCAACAG

>1102

GAGTTGAGGGCGATGAGAGCGGGTACTGCGAACTGCCGGGCGATGCTGTCGCTGCCG  
CCGTGATACGGAGAGCAACAGTTCCCCAGCAACACCCCTCCCGACACAGGCACACA  
CCCCCGACAGGCACGCACACCCACC

>1103

GTTGAGGGCGATGAGAGCGGGTACTGCGAACTGCCGGGCGATGCTGTCGCTGCCGCC  
GTGATACGGAGAGCAACAGTTCCCCAGCAACACCCCTCCCGACACAGGCACACACC  
CCCGACAGGCACGCACACCCACCCC

>1104

GAGCGGGTACTGCGAACTGCCGGGCGATGCTGTCGCTGCCGCCGTGATACGGAGAGC  
AACAGTTCCCCAGCAACACCCCTCCCGACACAGGCACACACCCCCGACAGGCACG  
CACACCCACCCACAGTGCCCGGCTC

>1105

GGGCGATGCTGTCGCTGCCCGGTGATACGGAGAGCAACAGTTCCCCAGCAACACCCC  
TCCCGACACAGGCACACACCCCCCGACAGGCACGCACACCCACCCACAGTGCCCG  
GCTCGGCTGCGGTGAGTGAGGGGCC

>1106

CGCCGTGATACGGAGAGCAACAGTTCCCCAGCAACACCCCTCCCGACACAGGCACA  
CACCCCCGACAGGCACGCACACCCACCCACAGTGCCCGGCTCGGCTGCGGTGAGT  
GAGGGGCCGGGAAGAGGCGCACCGCC

>1107

AGTTCCCCAGCAACACCCCTCCCGACACAGGCACACACCCCCCGACAGGCACGCAC  
ACCCACCCACAGTGCCCGGCTCGGCTGCGGTGAGTGAGGGGCCGGGAAGAGGCGC  
ACCGCCAGCGAGCGCCGCGCGCCGGG

>1108

CCGACACAGGCACACACCCCCGACAGGCACGCACACCCACCCACAGTGCCCGGCT  
CGGCTGCGGTGAGTGAGGGGCCGGGAAGAGGCGCACCGCCAGCGAGCGCCGCGCG  
CCGGGGCTTCCGGGGCTGGAGAGGTC

>1109

ACCCCCGACAGGCACGCACACCCACCCACAGTGCCCGGCTCGGCTGCGGTGAGTG  
AGGGGCCGGGAAGAGGCGCACCGCCAGCGAGCGCCGCGCGCCGGGGCTTCCGGG  
GCTGGAGAGGTCTGGGGGGCGCGCT

>1110

CACCCACCCACAGTGCCCGGCTCGGCTGCGGTGAGTGAGGGGCCGGGAAGAGGCGC  
ACCGCCAGCGAGCGCCGCGCGCCGGGGCTTCCGGGGCTGGAGAGGTCTGGGGGGC  
GCGCGCTCGCTTCGGCCACTCGGCCG

>1111

GTGAGTGAGGGGCCGGGAAGAGGCGCACCGCCAGCGAGCGCCGCGCGCCGGGGCT

TCCCGGGGCTGGAGAGGTCTGGGGGGCGCGCTCGCTTCGGCCACTCGGCCGCTGG  
GCTTGTGCCTTTTTTATTTGGCGTGT

>1112

CTCGCTTCGGCCACTCGGCCGCTGGGCTTGTGCCTTTTTTATTTGGCGTGTTCCTTCCT  
GCCGCTGCAGCCGTGCCGCCACCGTTGGGGGTTCGGCTAGAAGGGGGAGCCCCGGC  
TGTCAGCCTGGGCGCAGCTGCCT

>1113

GCCTTTTTTATTTGGCGTGTTCCTTCCTGCCGCTGCAGCCGTGCCGCCACCGTTGG  
GGGTTCGGCTAGAAGGGGGAGCCCCGGCTGTCAGCCTGGGCGCAGCTGCCTCCCCAGC  
CCTTCCTTTCAGGGCACGGTCGG

>1114

TTTTTTATTTGGCGTGTTCCTTCCTGCCGCTGCAGCCGTGCCGCCACCGTTGGGGG  
TCGGCTAGAAGGGGGAGCCCCGGCTGTCAGCCTGGGCGCAGCTGCCTCCCCAGCCCT  
TCCTTTCAGGGCACGGTCGGGGT

>1115

CTGCAGCCGTGCCGCCACCGTTGGGGGTTCGGCTAGAAGGGGGAGCCCCGGCTGTC  
AGCCTGGGCGCAGCTGCCTCCCCAGCCCTTCTTTCAGGGCACGGTCGGGGTGAGA  
GGTGGGGGGCGTAGCGGTGTGCGGGG

>1116

CCGCCACCGTTGGGGGTTCGGCTAGAAGGGGGAGCCCCGGCTGTCAGCCTGGGCGCA  
GCTGCCTCCCCAGCCCTTCTTTCAGGGCACGGTCGGGGTGAGAGGTGGGGGGCGT  
AGCGGTGTGCGGGGGCTGAGGGCGTG

>1117

GGGTTCGGCTAGAAGGGGGAGCCCCGGCTGTCAGCCTGGGCGCAGCTGCCTCCCCAGC  
CCTTCCTTTCAGGGCACGGTCGGGGTGAGAGGTGGGGGGCGTAGCGGTGTGCGGGG  
GCTGAGGGCGTGAGCAGAGGGGTTCGG

>1118

GCCTGGGCGCAGCTGCCTCCCCAGCCCTTCTTTCAGGGCACGGTCGGGGTGAGAG  
GTGGGGGGCGTAGCGGTGTGCGGGGGCTGAGGGCGTGAGCAGAGGGGTTCGGGGATC  
CGGAGGCTTTGTACCGCCAGGGGCTGG

>1119

CCCCAGCCCTTCTTTCAGGGCACGGTCGGGGTGAGAGGTGGGGGGCGTAGCGGTG  
TGCGGGGGCTGAGGGCGTGAGCAGAGGGGTTCGGGGATCCGGAGGCTTTGTACCGCCA  
GGGGCTGGCGGAGCAACAGAGCCCGT

>1120

CTTCTTTCAGGGCACGGTCGGGGTGAGAGGTGGGGGGCGTAGCGGTGTGCGGGGG  
CTGAGGGCGTGAGCAGAGGGGTTCGGGGATCCGGAGGCTTTGTACCGCCAGGGGCTGG  
CGGAGCAACAGAGCCCGTGGGTGCTC

>1121

GGCGTAGCGGTGTGCGGGGGCTGAGGGCGTGAGCAGAGGGGTTCGGGGATCCGGAGG  
CTTTGTACCGCCAGGGGCTGGCGGAGCAACAGAGCCCGTGGGTGCTCTTATGTATGCG  
GACCGGTGCGCGGGCGCAAGATAAGG

>1122

TGCGGGGGCTGAGGGCGTGAGCAGAGGGGTTCGGGGATCCGGAGGCTTTGTACCGCCA  
GGGGCTGGCGGAGCAACAGAGCCCGTGGGTGCTCTTATGTATGCGGACCGGTGCGCG  
GGCGCAAGATAAGGTTGTGGTTTATT

>1123

CTGAGGGCGTGAGCAGAGGGGTCGGGGATCCGGAGGCTTTGTACCGCCAGGGGCTGG  
CGGAGCAACAGAGCCCGTGGGTGCTCTTATGTATGCGGACCGGTGCGCGGGCGCAAG  
ATAAGTTGTGGTTTATTTATTTGTG

>1124

CGCCAGGGGCTGGCGGAGCAACAGAGCCCGTGGGTGCTCTTATGTATGCGGACCGGT  
GCGCGGGCGCAAGATAAGGTTGTGGTTATTTATTTGTGTGTTTATTCGCCGGCCGGCT  
GGGAAGCTAGAATCGGAGGAGCTG

>1125

GGGGCTGGCGGAGCAACAGAGCCCGTGGGTGCTCTTATGTATGCGGACCGGTGCGCG  
GGCGCAAGATAAGGTTGTGGTTATTTATTTGTGTGTTTATTCGCCGGCCGGCTGGGAA  
GCTAGAATCGGAGGAGCTGACGAG

>1126

CCGGTGC CGGGCGCAAGATAAGGTTGTGGTTATTTATTTGTGTGTTTATTCGCCGGC  
CGGCTGGGAAGCTAGAATCGGAGGAGCTGACGAGTAGATCTGGGGGCGGAGGGGAGC  
AGGACTGGGACTGCTTACGTTTTG

>1127

TGCGCGGGCGCAAGATAAGGTTGTGGTTATTTATTTGTGTGTTTATTCGCCGGCCGGC  
TGGAAGCTAGAATCGGAGGAGCTGACGAGTAGATCTGGGGGCGGAGGGGAGCAGG  
ACTGGGACTGCTTACGTTTTGTTTC

>1128

CGCAAGATAAGGTTGTGGTTATTTATTTGTGTGTTTATTCGCCGGCCGGCTGGGAAGCT  
AGAATCGGAGGAGCTGACGAGTAGATCTGGGGGCGGAGGGGAGCAGGACTGGGACT  
GCTTACGTTTTGTTTCTTTGAG

>1129

GTTGTGGTTTATTTATTTGTGTGTTTATTCGCCGGCCGGCTGGGAAGCTAGAATCGGAG  
GAGCTGACGAGTAGATCTGGGGGCGGAGGGGAGCAGGACTGGGACTGCTTACGTTTT  
GTTTCTCTTTGAGAAAACGTGGTG

>1130

GAGCTGACGAGTAGATCTGGGGGCGGAGGGGAGCAGGACTGGGACTGCTTACGTTTT  
GTTTCTCTTTGAGAAAACGTGGTGGGCTTTTTCTTGATTGGACTTGATCCCCACCCCC  
TTTTGCAGGGGAGGGAGGGAAGCT

>1131

TTTGTCTCTTTGAGAAAACGTGGTGGGCTTTTTCTTGATTGGACTTGATCCCCACCC  
CCCTTTGCAGGGGAGGGAGGGAAGCTCCAGAGGGTCTGCAGCGCTGCGGGCCCTCC  
TCGGCTCTCGGCGGGACCGGCGGT

>1132

TTCTCTTTGAGAAAACGTGGTGGGCTTTTTCTTGATTGGACTTGATCCCCACCCCTT  
TTGCAGGGGAGGGAGGGAAGCTCCAGAGGGTCTGCAGCGCTGCGGGCCCTCCTCGGC  
TCTCGGCGGGACCGGCGGTGACAC

>1133

TTTTCTTGATTGGACTTGATCCCCACCCCTTTTGCAGGGGAGGGAGGGAAGCTCCA  
GAGGGTCTGCAGCGCTGCGGGCCCTCCTCGGCTCTCGGCGGGACCGGCGGTGACACC  
GGAGCTCGCCGTGCGCTCCCGGCCG

>1134

GAAGCTCCAGAGGGTCTGCAGCGCTGCGGGCCCTCCTCGGCTCTCGGCGGGACCGGC

GGTGACACCGGAGCTCGCCGTGCGCTCCCGGCCGCTCTCGGTGGGTGCCGGTCTCTGC  
ACCTGATGCGTTTCGGGATGCCTTTC

>1135

TCGGTGGGTGCCGGTCTCTGCACCTGATGCGTTCGGGATGCCTTTCACCCCTGGCGC  
GCCCCCGCTAGCTCGACAGCGCTCGCACACTCCCGCACGCGCTTGAAATGCGCAC  
GGTCCCGCCGGCCCGGAACCAC

>1136

GCCGGTCTCTGCACCTGATGCGTTCGGGATGCCTTTCACCCCTGGCGCGCCCGCCGCT  
AGCTCGCACAGCGCCTCGCACACTCCCGCACGCGCTTGAAATGCGCACGGTCCCGCC  
GGCCCGCGGAACCACCCGGACGCA

>1137

CGCACACTCCCGCACGCGCTTGAAATGCGCACGGTCCCGCCGGCCCGCGGAACCACC  
CGGACGCACGGAGCGCTCCGCACCGACTCGCTCGCCGCTCCCGAGACGCTCGCAC  
CTGCTTGGGCCGGGCGCGCTGGCCG

>1138

TCCCGCCGGCCCGCGGAACCACCCGGACGCACGGAGCGCTCCGCACCGACTCGCTCG  
CCGCTCCCGAGACGCTCGACCGTGCTTGGGCCGGGCGCGCTGGCCGCTGGCGCC  
GCTGGCCAGAGGCCTGGGACCCAGCC

>1139

CTCGCCGCTCCCGAGACGCTCGACCGTGCTTGGGCCGGGCGCGCTGGCCGCTGG  
CGCCGCTGGCCAGAGGCCTGGGACCCAGCCGGTCGCTCCAGGGGGTACGGCCCTG  
GGTCGGAGAGGGAGGGCGGGCAGACC

>1140

CGCCGCTCCCGAGACGCTCGACCGTGCTTGGGCCGGGCGCGCTGGCCGCTGGCG  
CCGCTGGCCAGAGGCCTGGGACCCAGCCGGTCGCTCCAGGGGGTACGGCCCTGGG  
TCGGAGAGGGAGGGCGGGCAGACCC

>1141

AGACGCTCGACCGTGCTTGGGCCGGGCGCGCTGGCCGCTGGCGCCGCTGGCCAGAG  
GCCTGGGACCCAGCCGGTCGCTCCAGGGGGTACGGCCCTGGGTTCGGAGAGGGAGG  
GCGGGCAGACCCCTTCTCGCCTTTC

>1142

TGCTTGGGCCGGGCGCGCTGGCCGCTGGCGCCGCTGGCCAGAGGCCTGGGACCCAGC  
CGGTCGCTCCAGGGGGTACGGCCCTGGGTTCGGAGAGGGAGGGCGGGCAGACCCCT  
TCTCGCCTTTCCTCCACAACCTCGCT

>1143

GCCGCTGGCCAGAGGCCTGGGACCCAGCCGGTCGCTCCAGGGGGTACGGCCCTGG  
GTCGGAGAGGGAGGGCGGGCAGACCCCTTCTCGCCTTTCCTCCACAACCTCGCTGCG  
GGGCTTTTGCTTCCCCTTCGCCG

>1144

CAGAGGCCTGGGACCCAGCCGGTCGCTCCAGGGGGTACGGCCCTGGGTTCGGAGAG  
GGAGGGCGGGCAGACCCCTTCTCGCCTTTCCTCCACAACCTCGCTGCGGGGCTTTTGT  
GCTTCCCCTTCGCCGCGGGGCGGGT

>1145

GCTGCGGGGCTTTTGCTTCCCCTTCGCCGCGGGGCGGGTCCGCCTCCCCTGCCGCT  
CTCGCCGCGGAGTCCAGCCCGCCGGACTGTCGCCGTTCTCCCGTCTTTTCGCTTT  
CCCTCGTCCCTAGCTCAGCTCTC

>1146

GGGGCTTTTGTGCTTCCCCTTCGCCGCGGGGCGGGTCCGCCTCCCCTGCCGCTCTCGC  
CGCGGAGTCCAGCCC GCCGACTGTCGCCGTTCTCCCCGTCTTTTCGCTTCCCTC  
GTCCCTAGCTCAGCTCTCCTTCT

>1147

CGCCGCGGAGTCCAGCCC GCCGACTGTCGCCGTTCTCCCCGTCTTTTCGCTTCC  
CTCGTCCCTAGCTCAGCTCTCCTTCTTTCAGGAGTCTAGCTCCTCGGGAAAAGTTGCTT  
CCCCAAGTTTGCTGAAGTCGTC

>1148

CGGAGTCCAGCCC GCCGACTGTCGCCGTTCTCCCCGTCTTTTCGCTTCCCTCGT  
CCCTAGCTCAGCTCTCCTTCTTTCAGGAGTCTAGCTCCTCGGGAAAAGTTGCTTCCCA  
AGTTTGCTGAAGTCGCTCCAA

>1149

CCGGACTGTCGCCGTTCTCCCCGTCTTTTCGCTTCCCTCGTCCCTAGCTCAGCTCT  
CCTTCTTTCAGGAGTCTAGCTCCTCGGGAAAAGTTGCTTCCCAAGTTTGCTGAAGTC  
GTCTCCAAGTCTCGGTGGGGGTC

>1150

GACTGTCGCCGTTCTCCCCGTCTTTTCGCTTCCCTCGTCCCTAGCTCAGCTCTCCTT  
CTTTCAGGAGTCTAGCTCCTCGGGAAAAGTTGCTTCCCAAGTTTGCTGAAGTCGTCT  
CCAAGTCTCGGTGGGGGTCGCT

>1151

CGTCTTTTCGCTTCCCTCGTCCCTAGCTCAGCTCTCCTTCTTTCAGGAGTCTAGCTCC  
TCGGGAAAAGTTGCTTCCCAAGTTTGCTGAAGTCGTCTCCAAGTCTCGGTGGGGGTC  
GCTGGGAAGTGGGGGGTGTGA

>1152

TCTCCTTCTTTCAGGAGTCTAGCTCCTCGGGAAAAGTTGCTTCCCAAGTTTGCTGAAG  
TCGTCTCCAAGTCTCGGTGGGGGTCGCTGGGAAGTGGGGGGTGTGAGAGCGCGGTC  
GATCCCCGGAGCTCGGGCGGGTTA

>1153

TGCTTCCCAAGTTTGCTGAAGTCGTCTCCAAGTCTCGGTGGGGGTCGCTGGGAAGT  
GGGGGGTGTGAGAGCGCGGTGATCCCCGGAGCTCGGGCGGGTTATCGCCGGCTTTC  
CCCGCGCCGCTGGACTGGACGCT

>1154

AGTCGTCTCCAAGTCTCGGTGGGGGTCGCTGGGAAGTGGGGGGTGTGAGAGCGCGG  
TCGATCCCCGGAGCTCGGGCGGGTTATCGCCGGCTTCCCCGCGCCGCTGGACTGG  
ACGCTGCAGCCAGCGCCAGCCGGAT

>1155

CGGTCGATCCCCGGAGCTCGGGCGGGTTATCGCCGGCTTCCCCGCGCCGCTGGAC  
TGGACGCTGCAGCCAGCGCCAGCCGGATCGCGGGCGCCGAGCGGCGGGTGGGGGAG  
ACGGCTGCCCCGTGGGCGCCAGATT

>1156

CGATCCCCGGAGCTCGGGCGGGTTATCGCCGGCTTCCCCGCGCCGCTGGACTGGA  
CGCTGCAGCCAGCGCCAGCCGGATCGCGGGCGCCGAGCGGCGGGTGGGGGAGACGG  
CTGCCCCGTGGGCGCCAGATTTCCC

>1157

CCGGAGCTCGGGCGGGTTATCGCCGGCTTCCCCGCGCCGCTGGACTGGACGCTGC

AGCCAGCGCCAGCCGGATCGCGGGCGCCGAGCGGCGGGTGGGGGAGACGGCTGCC  
CGTGGGCGCCAGATTTCCCTCAGGA  
>1158  
TCGCCGGCTCTTCCCCGCGCCGCTGGACTGGACGCTGCAGCCAGCGCCAGCCGGATC  
GCGGGCGCCGAGCGGCGGGTGGGGGAGACGGCTGCCCCGTGGGCGCCAGATTTCCC  
TCAGGACCCAAAAAGCTTGTTCAG  
>1159  
CGCGCCGCTGGACTGGACGCTGCAGCCAGCGCCAGCCGGATCGCGGGCGCCGAGCG  
GCGGGTGGGGGAGACGGCTGCCCCGTGGGCGCCAGATTTCCCTCAGGACCCAAAA  
GCTTGTTCAGGGCGCCAAGCTTCCA  
>1160  
CAGCCAGCGCCAGCCGGATCGCGGGCGCCGAGCGGCGGGTGGGGGAGACGGCTGCC  
CCGTGGGCGCCAGATTTCCCTCAGGACCCAAAAAGCTTGTTCAGGGCGCCAAGCTT  
CCATTCTTTGGCTGTTCCTCCCTA  
>1161  
AGCCGGATCGCGGGCGCCGAGCGGCGGGTGGGGGAGACGGCTGCCCCGTGGGCGCC  
CAGATTTCCCTCAGGACCCAAAAAGCTTGTTCAGGGCGCCAAGCTTCCATTCTTTG  
GCTGTCCCTCCCTAGTTCTCAGAAA  
>1162  
GGGCGCCGAGCGGCGGGTGGGGGAGACGGCTGCCCCGTGGGCGCCAGATTTCCCTC  
AGGACCCAAAAAGCTTGTTCAGGGCGCCAAGCTTCCATTCTTTGGCTGTTCCTCC  
CTAGTTCTCAGAAACCCCGATGTCT  
>1163  
TTCCCTCAGGACCCAAAAAGCTTGTTCAGGGCGCCAAGCTTCCATTCTTTGGCTGT  
TCCCTCCCTAGTTCTCAGAAACCCCGATGTCTGCGGAAAGCACGCGGTGGCTCGGCT  
CGGCTGAATGGTCATCCCAACCT  
>1164  
CAGGACCCAAAAAGCTTGTTCAGGGCGCCAAGCTTCCATTCTTTGGCTGTTCCTC  
CCTAGTTCTCAGAAACCCCGATGTCTGCGGAAAGCACGCGGTGGCTCGGCTCGGCTG  
AATGGTCATCCCAACCTTGACGGC  
>1165  
GGGCGCCAAGCTTCCATTCTTTGGCTGTTCCTCCCTAGTTCTCAGAAACCCCGATGT  
CTGCGGAAAGCACGCGGTGGCTCGGCTCGGCTGAATGGTCATCCCAACCTTGACGG  
CCTCCGTCCCCACCCGGGGCGGG  
>1166  
GCGGTGGCTCGGCTCGGCTGAATGGTCATCCCAACCTTGACGGCCTCCGTCCCCACCC  
CGGGGCGGGCAGCAAAAATGTCTTGACCAGCCGTCCTGTGAATCCTTTCTGCGTGAGC  
TTGGTGGCTCCTGAACTGATAGAG  
>1167  
TGAATGGTCATCCCAACCTTGACGGCCTCCGTCCCCACCCGGGGCGGGCAGCAAAAA  
TGCTTTGACCAGCCGTCCTGTGAATCCTTTCTGCGTGAGCTTGGTGGCTCCTGAACTGA  
TAGAGCTCCTTCTGGGGGTGGAG  
>1168  
TCCGTCCCCACCCGGGGCGGGCAGCAAAAATGTCTTGACCAGCCGTCCTGTGAATCC  
TTTCTGCGTGAGCTTGGTGGCTCCTGAACTGATAGAGCTCCTTCTGGGGGTGGAGGCA  
AGCAAGCAGTGTTCGAAGAGTGAG



>1169

AGCAAAAATGTCTTGACCAGCCGTCCTGTGAATCCTTTCTGCGTGAGCTTGGTGGCTC  
CTGAACTGATAGAGCTCCTTCTGGGGGTGGAGGCAAGCAAGCAGTGTTCGAAGAGTG  
AGGGAGAGACCTTGCTGTTCTTGC

>1170

CAAAAATGTCTTGACCAGCCGTCCTGTGAATCCTTTCTGCGTGAGCTTGGTGGCTCCTG  
AACTGATAGAGCTCCTTCTGGGGGTGGAGGCAAGCAAGCAGTGTTCGAAGAGTGAGG  
GAGAGACCTTGCTGTTCTTGC

>1171

CCGTCCTGTGAATCCTTTCTGCGTGAGCTTGGTGGCTCCTGAACTGATAGAGCTCCTTC  
TGGGGGTGGAGGCAAGCAAGCAGTGTTCGAAGAGTGAGGGAGAGACCTTGCTGTTCC  
TTGCTCTCAGTGCATTCACTGCAA

>1172

CGTGAGCTTGGTGGCTCCTGAACTGATAGAGCTCCTTCTGGGGGTGGAGGCAAGCAA  
GCAGTGTTCGAAGAGTGAGGGAGAGACCTTGCTGTTCTTGCCTCAGTGCATTCACT  
GCAATATTGGTCGCTGTAAGACAGA

>1173

TTCTGGGGGTGGAGGCAAGCAAGCAGTGTTCGAAGAGTGAGGGAGAGACCTTGCTGT  
TCCTTGCTCTCAGTGCATTCACTGCAATATTGGTCGCTGTAAGACAGACACGGGGAGG  
GTCCTGGGCCTGCGCGGTCTTTCTA

>1174

CGAAGAGTGAGGGAGAGACCTTGCTGTTCTTGCCTCAGTGCATTCACTGCAATATT  
GGTCGCTGTAAGACAGACACGGGGAGGGTCCTGGGCCTGCGCGGTCTTTCTAACACTC  
CTTTAAGCGAGGTTTGGAGTCTAG

>1175

GAGACCTTGCTGTTCTTGCCTCAGTGCATTCACTGCAATATTGGTCGCTGTAAGACA  
GACACGGGGAGGGTCCTGGGCCTGCGCGGTCTTTCTAACACTCCTTTAAGCGAGGTTT  
GGAGTCTAGGAGCCCTTATTG

>1176

ATATTGGTCGCTGTAAGACAGACACGGGGAGGGTCCTGGGCCTGCGCGGTCTTTCTAA  
CACTCCTTTAAGCGAGGTTTGGAGTCTAGGAGCCCTTATTGATCCCGGACAGGCTCT  
GGGAGAGGCCTTTGTTCCAGC

>1177

GTAAGACAGACACGGGGAGGGTCCTGGGCCTGCGCGGTCTTTCTAACACTCCTTTAAG  
CGAGGTTTGGAGTCTAGGAGCCCTTATTGATCCCGGACAGGCTCTGGGAGAGGCCT  
TTGTTTCCAGCCCTGTCTTCCCT

>1178

ACAGACACGGGGAGGGTCCTGGGCCTGCGCGGTCTTTCTAACACTCCTTTAAGCGAGG  
TTTGGAGTCTAGGAGCCCTTATTGATCCCGGACAGGCTCTGGGAGAGGCCTTTGTTT  
CCCAGCCCTGTCTTCCCTTCGTA

>1179

GACACGGGGAGGGTCCTGGGCCTGCGCGGTCTTTCTAACACTCCTTTAAGCGAGGTTT  
GGAGTCTAGGAGCCCTTATTGATCCCGGACAGGCTCTGGGAGAGGCCTTTGTTTCC  
CAGCCCTGTCTTCCCTTCGACTG

>1180

TGCGCGGTCTTTCTAACACTCCTTTAAGCGAGGTTTGGAGTCTAGGAGCCCTTATTG

ATCCCGGACAGGCTCTGGGAGAGGCCTTTGTTTCCCAGCCCTGTCTTCCCTTCGTA  
GTTGTAACACTCACACCACAGGTG

>1181

TTCTAACACTCCTTTAAGCGAGGTTTGGAGTCTAGGAGCCCTTATTGATCCCGGACA  
GGCTCTGGGAGAGGCCTTTGTTTCCCAGCCCTGTCTTCCCTTCGTA  
ACTGGTTGTAAC  
ACACCACAGGTGCTGGTGCCAA

>1182

CAGGCTCTGGGAGAGGCCTTTGTTTCCCAGCCCTGTCTTCCCTTCGTA  
ACTGGTTGTAAC  
TCACACCACAGGTGCTGGTGCCAATATCACTTCCAGCGCCTCTGAGCCATGTCCAGCAT  
CCCTTGCTGCCCCTGGTCACAG

>1183

CCCAGCCCTGTCTTCCCTTCGTA  
ACTGGTTGTAAC  
TCACACCACAGGTGCTGGTGCCAAT  
ATCACTTCCAGCGCCTCTGAGCCATGTCCAGCATCCCTTGCTGCCCCTGGTCACAGGAC  
TTGCAGACTCCTTGGAGCCTGT

>1184

TCTTCCCTTCGTA  
ACTGGTTGTAAC  
TCACACCACAGGTGCTGGTGCCAATATCACTTCCA  
GCGCCTCTGAGCCATGTCCAGCATCCCTTGCTGCCCCTGGTCACAGGACTTGCAGACT  
CCTTGGAGCCTGTGGGACACACG

>1185

GTA  
CTGGTTGTAAC  
TCACACCACAGGTGCTGGTGCCAATATCACTTCCAGCGCCTCTGA  
GCCATGTCCAGCATCCCTTGCTGCCCCTGGTCACAGGACTTGCAGACTCCTTGGAGCC  
TGTGGGACACACGTGGAGTTCAC

>1186

GTGCTGGTGCCAATATCACTTCCAGCGCCTCTGAGCCATGTCCAGCATCCCTTGCTGCC  
CCTGGTCACAGGACTTGCAGACTCCTTGGAGCCTGTGGGACACACGTGGAGTTCACA  
CACCCAGCCCAGCATGAGCACTCC

>1187

TCCAGCGCCTCTGAGCCATGTCCAGCATCCCTTGCTGCCCCTGGTCACAGGACTT  
GCA  
GACTCCTTGGAGCCTGTGGGACACACGTGGAGTTCACACACCCAGCCCAGCATGAGC  
ACTCCTGGCTGTAGGGGACCATATT

>1188

TCCAGCATCCCTTGCTGCCCCTGGTCACAGGACTTGCAGACTCCTTGGAGCCTGTGGG  
ACACACGTGGAGTTCACACACCCAGCCCAGCATGAGCACTCCTGGCTGTAGGGGACC  
ATATTTAACTATGGTCTCTCCAT

>1189

GCTGCCCCTGGTCACAGGACTTGCAGACTCCTTGGAGCCTGTGGGACACACGTGGAG  
TTCACACACCCAGCCCAGCATGAGCACTCCTGGCTGTAGGGGACCATATTTAACTATGG  
TCTCTCTCCATACCTTAATGACCC

>1190

ACTCCTTGGAGCCTGTGGGACACACGTGGAGTTCACACACCCAGCCCAGCATGAGCA  
CTCCTGGCTGTAGGGGACCATATTTAACTATGGTCTCTCTCCATACCTTAATGACCCATC  
CTTCTTCGTTTTTTAGATCCTCC

>1191

GCTGTAGGGGACCATATTTAACTATGGTCTCTCTCCATACCTTAATGACCCATCCTTCTT  
CGTTTTTTAGATCCTCCTGTCCACCGGGCAGTTGTGGGCAGGAGGGTAGGTACGACAC  
CTTACGTAAGTGTGTGTGTGTA

>1192

CTATGGTCTCTCTCCATACCTTAATGACCCATCCTTCTTCGTTTTTTAGATCCTCCTGTCC  
ACCGGGCAGTTGTGGGCAGGAGGGTAGGTACGACACCTTACGTAAGTGTGTGTGTGTA  
AACACACACACACTTTTTTTTT

>1193

TCTCCATACCTTAATGACCCATCCTTCTTCGTTTTTTAGATCCTCCTGTCCACCGGGCAG  
TTGTGGGCAGGAGGGTAGGTACGACACCTTACGTAAGTGTGTGTGTGTAACACACAC  
ACACTTTTTTTTTTTTTTTCTG

>1194

TTGTTTTTTTAGATCCTCCTGTCCACCGGGCAGTTGTGGGCAGGAGGGTAGGTACGAC  
ACCTTACGTAAGTGTGTGTGTGTAACACACACACACTTTTTTTTTTTTTTTCTGAGAC  
GGAGTTTTGCTCCTGTTGCCAG

>1195

GGGTAGGTACGACACCTTACGTAAGTGTGTGTGTGTAACACACACACACTTTTTTTTT  
TTTTTTCTGAGACGGAGTTTTGCTCCTGTTGCCAGGCTGGAGTGCAGTGGCGCAATC  
TCGGCTCACGGCAACCTCCGCCT

>1196

GTACGACACCTTACGTAAGTGTGTGTGTGTAACACACACACACTTTTTTTTTTTTTTT  
CTGAGACGGAGTTTTGCTCCTGTTGCCAGGCTGGAGTGCAGTGGCGCAATCTCGGCT  
CACGGCAACCTCCGCCTCCCGGT

>1197

TGTGTGTGTGTAACACACACACACTTTTTTTTTTTTTTTCTGAGACGGAGTTTTGCTC  
CTGTTGCCAGGCTGGAGTGCAGTGGCGCAATCTCGGCTCACGGCAACCTCCGCCTCC  
CGTTTTCAAGTGATTCTCCTGCC

>1198

GTGTAACACACACACACTTTTTTTTTTTTTTTCTGAGACGGAGTTTTGCTCCTGTTGC  
CCAGGCTGGAGTGCAGTGGCGCAATCTCGGCTCACGGCAACCTCCGCCTCCCGGTTTC  
AAGTGATTCTCCTGCCTCAGCCT

>1199

TCCTGTTGCCAGGCTGGAGTGCAGTGGCGCAATCTCGGCTCACGGCAACCTCCGCCT  
CCCGTTTTCAAGTGATTCTCCTGCCTCAGCCTCCCGAGTAGCTGGGATTACAGGCGGG  
TGCCACCGGCCTGGCTAATTTTG

>1200

GAGTGCAGTGGCGCAATCTCGGCTCACGGCAACCTCCGCCTCCCGTTTTCAAGTGATT  
CTCCTGCCTCAGCCTCCCGAGTAGCTGGGATTACAGGCGGGTGCCACCGGCCTGGCT  
AATTTTGTATTTTTGTAGAGACG

>1201

GCAATCTCGGCTCACGGCAACCTCCGCCTCCCGTTTTCAAGTGATTCTCCTGCCTCAGC  
CTCCCGAGTAGCTGGGATTACAGGCGGGTGCCACCGGCCTGGCTAATTTTGTATTTTT  
TGTAGAGACGGGGCTTCTCCAT

>1202

CTCAGCCTCCCGAGTAGCTGGGATTACAGGCGGGTGCCACCGGCCTGGCTAATTTTGT  
ATTTTTTGTAGAGACGGGGCTTCTCCATGTTGGTCAGGCTGGTCTCGAACTCCCGACCT  
CAGGTGATCCGCCTGCCTGGGC

>1203

CAGCCTCCCGAGTAGCTGGGATTACAGGCGGGTGCCACCGGCCTGGCTAATTTTGTAT

TTTTGTAGAGACGGGGCTTCTCCATGTTGGTCAGGCTGGTCTCGAACTCCCGACCTCA  
GGTGATCCGCCTGCCTGGGCCT

>1204

AATTTTGTATTTTTGTAGAGACGGGGCTTCTCCATGTTGGTCAGGCTGGTCTCGAACT  
CCCGACCTCAGGTGATCCGCCTGCCTGGGCCTCCCAAAGTGCTGGGATTAGAGGCGTG  
AGCCACCGCGCCCTACCCACAC

>1205

TTCTCCATGTTGGTCAGGCTGGTCTCGAACTCCCGACCTCAGGTGATCCGCCTGCCTGG  
GCCTCCCAAAGTGCTGGGATTAGAGGCGTGAGCCACCGCGCCCTACCCACACACTCT  
TTCTGTCTGTCTCTGGCTGGTGT

>1206

GTCAGGCTGGTCTCGAACTCCCGACCTCAGGTGATCCGCCTGCCTGGGCCTCCCAAAG  
TGCTGGGATTAGAGGCGTGAGCCACCGCGCCCTACCCACACACTCTTTCTGTCTGTCT  
CTGGCTGGTGTACATACACACAG

>1207

CAGGCTGGTCTCGAACTCCCGACCTCAGGTGATCCGCCTGCCTGGGCCTCCCAAAGTG  
CTGGGATTAGAGGCGTGAGCCACCGCGCCCTACCCACACACTCTTTCTGTCTGTCTCT  
GGCTGGTGTACATACACACAGTT

>1208

GTCTCGAACTCCCGACCTCAGGTGATCCGCCTGCCTGGGCCTCCCAAAGTGCTGGGAT  
TAGAGGCGTGAGCCACCGCGCCCTACCCACACACTCTTTCTGTCTGTCTCTGGCTGG  
TGTACATACACACAGTTCAGATTT

>1209

AGGCGTGAGCCACCGCGCCCTACCCACACACTCTTTCTGTCTGTCTCTGGCTGGTGT  
ACATACACACAGTTCAGATTTATATTATACATAACAATAACTTTGAGGCTTCCGTGGGTA  
GAAATGACCCAAGTTAGTGTGT

>1210

TGAGCCACCGCGCCCTACCCACACACTCTTTCTGTCTGTCTCTGGCTGGTGTACATAC  
ACACAGTTCAGATTTATATTATACATAACAATAACTTTGAGGCTTCCGTGGGTAGAAATG  
ACCCAAGTTAGTGTGTGGGTT

>1211

TTCTGTCTGTCTCTGGCTGGTGTACATACACACAGTTCAGATTTTATATTATACATAA  
AACTTTGAGGCTTCCGTGGGTAGAAATGACCCAAGTTAGTGTGTGGGTTGTGTGTGT  
CCTGTTAGTACCTAGGGATGG

>1212

GGCTGGTGTACATACACACAGTTCAGATTTTATATTATACATAACAATAACTTTGAGGCT  
CCGTGGGTAGAAATGACCCAAGTTAGTGTGTGGGTTGTGTGTGTTCTGTTAGTACCTA  
GGGATGGGGACAGGCCTTGGG

>1213

TACACACAGTTCAGATTTTATATTATACATAACAATAACTTTGAGGCTTCCGTGGGTAGAA  
ATGACCCAAGTTAGTGTGTGGGTTGTGTGTGTTCTGTTAGTACCTAGGGATGGGGACA  
GGCCTTGGGTCTGCCAGTGCT

>1214

CACAGTTCAGATTTTATATTATACATAACAATAACTTTGAGGCTTCCGTGGGTAGAAATGA  
CCCAAAGTTAGTGTGTGGGTTGTGTGTGTTCTGTTAGTACCTAGGGATGGGGACAGGC  
CTTGGGTCTGCCAGTGCTTTGC

>1215

CAATAACTTTGAGGCTTCCGTGGGTAGAAATGACCCAAGTTAGTGTGTGGGTTGTGTG  
TGTTCTGTAGTACCTAGGGATGGGGACAGGCCTTGGGTCTGCCAGTGCTTTGCAGC  
CCTGAGAACAGTAGAAGGCCAGAG

>1216

GTGGGTAGAAATGACCCAAGTTAGTGTGTGGGTTGTGTGTTCCTGTAGTACCTAGG  
GATGGGGACAGGCCTTGGGTCTGCCAGTGCTTTGCAGCCCTGAGAACAGTAGAAGGC  
CAGAGGCCAAGGCTGATGGTGAGA

>1217

CAAGTTAGTGTGTGGGTTGTGTGTTCCTGTAGTACCTAGGGATGGGGACAGGCCTT  
GGGTCTGCCAGTGCTTTGCAGCCCTGAGAACAGTAGAAGGCCAGAGGCCAAGGCTGA  
TGGTGAGAGGATAGCCTTTGCGGA

>1218

TGTGGGTTGTGTGTTCCTGTAGTACCTAGGGATGGGGACAGGCCTTGGGTCTGCC  
AGTGCTTTGCAGCCCTGAGAACAGTAGAAGGCCAGAGGCCAAGGCTGATGGTGAGAG  
GATAGCCTTTGCGGAGGAGAGCCCA

>1219

GGGATGGGGACAGGCCTTGGGTCTGCCAGTGCTTTGCAGCCCTGAGAACAGTAGAAG  
GCCAGAGGCCAAGGCTGATGGTGAGAGGATAGCCTTTGCGGAGGAGAGCCCAGTGTC  
CATAGATTTCTGTGGCCATGGCTACA

>1220

GGCCTTGGGTCTGCCAGTGCTTTGCAGCCCTGAGAACAGTAGAAGGCCAGAGGCCAA  
GGCTGATGGTGAGAGGATAGCCTTTGCGGAGGAGAGCCCAGTGCCATAGATTTCTGT  
GGCCATGGCTACAGGCTCCTGGCCT

>1221

GGTCTGCCAGTGCTTTGCAGCCCTGAGAACAGTAGAAGGCCAGAGGCCAAGGCTGAT  
GGTGAGAGGATAGCCTTTGCGGAGGAGAGCCCAGTGCCATAGATTTCTGTGGCCATG  
GCTACAGGCTCCTGGCCTCCAATGA

>1222

CCTGAGAACAGTAGAAGGCCAGAGGCCAAGGCTGATGGTGAGAGGATAGCCTTTGCG  
GAGGAGAGCCCAGTGCCATAGATTTCTGTGGCCATGGCTACAGGCTCCTGGCCTCCA  
ATGAGTTTACTCTGCTTCTGGGGC

>1223

CTGATGGTGAGAGGATAGCCTTTGCGGAGGAGAGCCCAGTGCCATAGATTTCTGTGG  
CCATGGCTACAGGCTCCTGGCCTCCAATGAGTTTACTCTGCTTCTGGGGCTCCTGTAG  
TGAGGCAGAGTTTGAAAACTG

>1224

CTTTGCGGAGGAGAGCCCAGTGCCATAGATTTCTGTGGCCATGGCTACAGGCTCCTG  
GCCTCCAATGAGTTTACTCTGCTTCTGGGGCTCCTGTAGTGAGGCAGAGTTTGAAA  
AACTGTTTAAAGATAAGGCTTGAC

>1225

TCTGTGGCCATGGCTACAGGCTCCTGGCCTCCAATGAGTTTACTCTGCTTCTGGGGCT  
CCTGTAGTGAGGCAGAGTTTGAAAACTGTTTAAAGATAAGGCTTGACATCCAGGGG  
GCTGGCGTGAAGCTGACAAGGAA

>1226

TGGCCATGGCTACAGGCTCCTGGCCTCCAATGAGTTTACTCTGCTTCTGGGGCTCCTG

TAGTGAGGCAGAGTTTGGAAAACTGTTTAAAGATAAGGCTTGACATCCAGGGGGCTG  
GCGTGAAGCTGACAAGGAAGGGG

>1227

GCCTCCAATGAGTTTACTCTGCTTCTGGGGCTCCTGTAGTGAGGCAGAGTTTGGAAA  
AACTGTTTAAAGATAAGGCTTGACATCCAGGGGGCTGGCGTGAAGCTGACAAGGAAG  
GGGCTAAAGTCTTGCTAATTTAAG

>1228

TCTGCTTCTGGGGCTCCTGTAGTGAGGCAGAGTTTGGAAAACTGTTTAAAGATAAGG  
CTTGACATCCAGGGGGCTGGCGTGAAGCTGACAAGGAAGGGGGCTAAAGTCTTGCTAA  
TTTTAAGTAAGTGCACCTTCATCATA

>1229

CCTGTAGTGAGGCAGAGTTTGGAAAACTGTTTAAAGATAAGGCTTGACATCCAGGGG  
GCTGGCGTGAAGCTGACAAGGAAGGGGGCTAAAGTCTTGCTAATTTAAGTAAGTGCAC  
TTCATCATAATGAATGTTGGCCTT

>1230

GAGGCAGAGTTTGGAAAACTGTTTAAAGATAAGGCTTGACATCCAGGGGGCTGGCG  
TGAAGCTGACAAGGAAGGGGGCTAAAGTCTTGCTAATTTAAGTAAGTGCACCTTCATCAT  
AATGAATGTTGGCCTTGCCTAGGG

>1231

CAGAGTTTGGAAAACTGTTTAAAGATAAGGCTTGACATCCAGGGGGCTGGCGTGAA  
GCTGACAAGGAAGGGGGCTAAAGTCTTGCTAATTTAAGTAAGTGCACCTTCATCATAATG  
AATGTTGGCCTTGCCTAGGGAGCC

>1232

ATAAGGCTTGACATCCAGGGGGCTGGCGTGAAGCTGACAAGGAAGGGGGCTAAAGTCT  
TGCTAATTTAAGTAAGTGCACCTTCATCATAATGAATGTTGGCCTTGCCTAGGGAGCCCC  
TACTCTCAGACACAGAGAAAGCT

>1233

AGGAAGGGGGCTAAAGTCTTGCTAATTTAAGTAAGTGCACCTTCATCATAATGAATGTTG  
GCCTTGCCTAGGGAGCCCCACTCTCAGACACAGAGAAAGCTGAGGACTTATAGGACT  
TCACTACAATTTTCATTTCACTT

>1234

AGGGGGCTAAAGTCTTGCTAATTTAAGTAAGTGCACCTTCATCATAATGAATGTTGGCCTT  
GCCTAGGGAGCCCCACTCTCAGACACAGAGAAAGCTGAGGACTTATAGGACTTCACT  
ACAATTTTCATTTCACTTCATC

>1235

TTAAGTAAGTGCACCTTCATCATAATGAATGTTGGCCTTGCCTAGGGAGCCCCACTCTC  
AGACACAGAGAAAGCTGAGGACTTATAGGACTTCACTACAATTTTCATTTCACTTCATC  
TAACAGATGTCATAGAGTAGT

>1236

ATCATAATGAATGTTGGCCTTGCCTAGGGAGCCCCACTCTCAGACACAGAGAAAGCT  
GAGGACTTATAGGACTTCACTACAATTTTCATTTCACTTCATCTAACAGATGTCATAGAG  
TAGTGAATTAGGCATCTGCTGT

>1237

CTCTCAGACACAGAGAAAGCTGAGGACTTATAGGACTTCACTACAATTTTCATTTCACT  
TCATCTAACAGATGTCATAGAGTAGTGAATTAGGCATCTGCTGTGGCAGAACCTTCTTT  
TACTCTCAGCATCCCTGGCTT

>1238

ACAGAGAAAGCTGAGGACTTATAGGACTTCACTACAATTTTCATTTCACTTCATCTAAC  
AGATGTCATAGAGTAGTGAATTAGGCATCTGCTGTGGCAGAACCTTCTTTTTACTCTCA  
GCATCCCTGGCTTGAAAGGCAG

>1239

AGGACTTATAGGACTTCACTACAATTTTCATTTCACTTCATCTAACAGATGTCATAGAGT  
AGTGAATTAGGCATCTGCTGTGGCAGAACCTTCTTTTTACTCTCAGCATCCCTGGCTTG  
AAAGGCAGATTTGTAGATTTT

>1240

CACTACAATTTTCATTTCACTTCATCTAACAGATGTCATAGAGTAGTGAATTAGGCATCT  
GCTGTGGCAGAACCTTCTTTTTACTCTCAGCATCCCTGGCTTGAAAGGCAGATTTGTAG  
ATTTCTAGGAAGCTACTTCAA

>1241

TTCATCTAACAGATGTCATAGAGTAGTGAATTAGGCATCTGCTGTGGCAGAACCTTCTT  
TTTACTCTCAGCATCCCTGGCTTGAAAGGCAGATTTGTAGATTTCTAGGAAGCTACTTC  
AATTAATCTCTAAGATCCTC

>1242

AGTAGTGAATTAGGCATCTGCTGTGGCAGAACCTTCTTTTTACTCTCAGCATCCCTGGC  
TTGAAAGGCAGATTTGTAGATTTCTAGGAAGCTACTTCAATTAATCTCTAAGATCCT  
CTTGCTAAGGGCTTGCAACAG

>1243

ATTAGGCATCTGCTGTGGCAGAACCTTCTTTTTACTCTCAGCATCCCTGGCTTGAAAGG  
CAGATTTGTAGATTTCTAGGAAGCTACTTCAATTAATCTCTAAGATCCTCTTGCTAAG  
GGCTTGCAACAGGGAGGAGG

>1244

TCTGCTGTGGCAGAACCTTCTTTTTACTCTCAGCATCCCTGGCTTGAAAGGCAGATTTG  
TAGATTTCTAGGAAGCTACTTCAATTAATCTCTAAGATCCTCTTGCTAAGGGCTTGGC  
AACAGGGAGGAGGGGGCATGT

>1245

TCTCAGCATCCCTGGCTTGAAAGGCAGATTTGTAGATTTCTAGGAAGCTACTTCAATTA  
AATCTCTAAGATCCTCTTGCTAAGGGCTTGCAACAGGGAGGAGGGGGCATGTTGTA  
GTGGTTGAATTTACTTTTAGG

>1246

ATTTGTAGATTTCTAGGAAGCTACTTCAATTAATCTCTAAGATCCTCTTGCTAAGGGC  
TTGGCAACAGGGAGGAGGGGGCATGTTGTAGTGGTTGAATTTACTTTTAGGGACAC  
TGATGAATTTGCTTTTGTCT

>1247

GTAGATTTCTAGGAAGCTACTTCAATTAATCTCTAAGATCCTCTTGCTAAGGGCTTG  
GCAACAGGGAGGAGGGGGCATGTTGTAGTGGTTGAATTTACTTTTAGGGACACTGA  
TGAATTTGCTTTTGTCTCTCA

>1248

TACTTCAATTAATCTCTAAGATCCTCTTGCTAAGGGCTTGCAACAGGGAGGAGGG  
GGCATGTTGTAGTGGTTGAATTTACTTTTAGGGACACTGATGAATTTGCTTTTGTTC  
TCTCATCTTTTGCTTCTCC

>1249

GATCCTCTTGCTAAGGGCTTGCAACAGGGAGGAGGGGGCATGTTGTAGTGGTTGAAT

TCTTACTTTTAGGGACTGATGAATTTGTCTTTTGTCTCTCATCTCTTTTGCTTCTTCC  
CCTCTTCTTCTCCTAGCCTC

>1250

TTAGGGACTGATGAATTTGTCTTTTGTCTCTCATCTCTTTTGCTTCTTCCCCTCTTCT  
TTCTCCTAGCCTCCTCTATTGGCCAGGAAGCCCACCCAGCCCCGCCACGCAGAGCCC  
AGAAGGAAAGAAAGCCTCATG

>1251

TTGTCTTTTGTCTCTCATCTCTTTTGCTTCTTCCCCTCTTCTTTCTCCTAGCCTCCTCTAT  
TGGCCCAGGAAGCCCACCCAGCCCCGCCACGCAGAGCCCAGAAGGAAAGAAAGCCT  
CATGCCTGAGCCGAGGGGAGCA

>1252

CTTTTGTCTCTCATCTCTTTTGCTTCTTCCCCTCTTCTTTCTCCTAGCCTCCTCTATTGG  
CCCAGGAAGCCCACCCAGCCCCGCCACGCAGAGCCCAGAAGGAAAGAAAGCCTCAT  
GCCTGAGCCGAGGGGAGCACCAT

>1253

GCTTCTTCCCCTCTTCTTTCTCCTAGCCTCCTCTATTGGCCCAGGAAGCCCACCCAGCC  
CCGCCACGCAGAGCCCAGAAGGAAAGAAAGCCTCATGCCTGAGCCGAGGGGAGCAC  
CATGGATCTGACAAAAATGGGCATG

>1254

CTATTGGCCCAGGAAGCCCACCCAGCCCCGCCACGCAGAGCCCAGAAGGAAAGAAAG  
CCTCATGCCTGAGCCGAGGGGAGCACCATGGATCTGACAAAAATGGGCATGATCCAGC  
TGCAGAACCCTAGCCACCCACGGG

>1255

GGCCCAGGAAGCCCACCCAGCCCCGCCACGCAGAGCCCAGAAGGAAAGAAAGCCTC  
ATGCCTGAGCCGAGGGGAGCACCATGGATCTGACAAAAATGGGCATGATCCAGCTGCA  
GAACCCTAGCCACCCACGGGGCTAC

>1256

GAAGGAAAGAAAGCCTCATGCCTGAGCCGAGGGGAGCACCATGGATCTGACAAAAAT  
GGGCATGATCCAGCTGCAGAACCCTAGCCACCCACGGGGCTACTGTGCAAGGCCAA  
CCAGATGCGGCTGGCCGGGACTTTGT

>1257

AAGAAAGCCTCATGCCTGAGCCGAGGGGAGCACCATGGATCTGACAAAAATGGGCAT  
GATCCAGCTGCAGAACCCTAGCCACCCACGGGGCTACTGTGCAAGGCCAACCAGAT  
GCGGCTGGCCGGGACTTTGTGCGATG

>1258

CTCATGCCTGAGCCGAGGGGAGCACCATGGATCTGACAAAAATGGGCATGATCCAGCT  
GCAGAACCCTAGCCACCCACGGGGCTACTGTGCAAGGCCAACCAGATGCGGCTGGC  
CGGGACTTTGTGCGATGTGGTCATC

>1259

CATGGATCTGACAAAAATGGGCATGATCCAGCTGCAGAACCCTAGCCACCCACGGGG  
CTACTGTGCAAGGCCAACCAGATGCGGCTGGCCGGGACTTTGTGCGATGTGGTCATCA  
TGGTGGACAGCCAGGAGTTCCACG

>1260

GGCTACTGTGCAAGGCCAACCAGATGCGGCTGGCCGGGACTTTGTGCGATGTGGTCAT  
CATGGTGGACAGCCAGGAGTTCCACGCCACCGGACGGTGCTGGCCTGCACCAGCAA  
GATGTTTGAGATCCTCTCCACCGC



>1261

ACTGTGCAAGGCCAACCAGATGCGGCTGGCCGGGACTTTGTGCGATGTGGTCATCATG  
GTGGACAGCCAGGAGTTCCACGCCACCGGACGGTGCTGGCCTGCACCAGCAAGATG  
TTTGAGATCCTCTCCACCGCAATA

>1262

TGTGCGATGTGGTCATCATGGTGGACAGCCAGGAGTTCCACGCCACCGGACGGTGCT  
GGCCTGCACCAGCAAGATGTTTGAGATCCTCTCCACCGCAATAGTCAAACTATACTT  
TGGACTTCTCTCGCCAAAGACC

>1263

CGATGTGGTCATCATGGTGGACAGCCAGGAGTTCCACGCCACCGGACGGTGCTGGCC  
TGCACCAGCAAGATGTTTGAGATCCTCTCCACCGCAATAGTCAAACTATACTTTGGA  
CTTCTCTCGCCAAAGACCTTCC

>1264

AGTTCCACGCCACCGGACGGTGCTGGCCTGCACCAGCAAGATGTTTGAGATCCTCTT  
CCACCGCAATAGTCAAACTATACTTTGGACTTCTCTCGCCAAAGACCTTCCAGCAGA  
TTCTGGAGTATGCATATACAGCC

>1265

CAGCAAGATGTTTGAGATCCTCTCCACCGCAATAGTCAAACTATACTTTGGACTTCC  
TCTCGCCAAAGACCTTCCAGCAGATTCTGGAGTATGCATATACAGCCACGCTGCAAGCC  
AAGGCGGAGGACCTGGATGACC

>1266

GTTTGAGATCCTCTCCACCGCAATAGTCAAACTATACTTTGGACTTCTCTCGCCAA  
AGACCTTCCAGCAGATTCTGGAGTATGCATATACAGCCACGCTGCAAGCCAAGGCGGA  
GGACCTGGATGACCTGCTGTATG

>1267

AGTCAAACTATACTTTGGACTTCTCTCGCCAAAGACCTTCCAGCAGATTCTGGAGTA  
TGCATATACAGCCACGCTGCAAGCCAAGGCGGAGGACCTGGATGACCTGCTGTATGCG  
GCCGAGATCCTGGAGATCGAGTA

>1268

ACTTTGGACTTCTCTCGCCAAAGACCTTCCAGCAGATTCTGGAGTATGCATATACAGC  
CACGCTGCAAGCCAAGGCGGAGGACCTGGATGACCTGCTGTATGCGGCCGAGATCCTG  
GAGATCGAGTACCTGGAGGAACA

>1269

GGACTTCTCTCGCCAAAGACCTTCCAGCAGATTCTGGAGTATGCATATACAGCCACGC  
TGCAAGCCAAGGCGGAGGACCTGGATGACCTGCTGTATGCGGCCGAGATCCTGGAGAT  
CGAGTACCTGGAGGAACAGTGCC

>1270

GGAGTATGCATATACAGCCACGCTGCAAGCCAAGGCGGAGGACCTGGATGACCTGCTG  
TATGCGGCCGAGATCCTGGAGATCGAGTACCTGGAGGAACAGTGCCTGAAGATGCTGG  
AGACCATCCAGGCCTCAGACGACA

>1271

AGCCACGCTGCAAGCCAAGGCGGAGGACCTGGATGACCTGCTGTATGCGGCCGAGAT  
CCTGGAGATCGAGTACCTGGAGGAACAGTGCCTGAAGATGCTGGAGACCATCCAGGC  
CTCAGACGACAATGACACGGAGGCCA

>1272

GCAAGCCAAGGCGGAGGACCTGGATGACCTGCTGTATGCGGCCGAGATCCTGGAGATC

GAGTACCTGGAGGAACAGTGCCTGAAGATGCTGGAGACCATCCAGGCCTCAGACGAC  
AATGACACGGAGGCCACCATGGCCG

>1273

CAAGGCGGAGGACCTGGATGACCTGCTGTATGCGGCCGAGATCCTGGAGATCGAGTAC  
CTGGAGGAACAGTGCCTGAAGATGCTGGAGACCATCCAGGCCTCAGACGACAATGAC  
ACGGAGGCCACCATGGCCGATGGCG

>1274

TGACCTGCTGTATGCGGCCGAGATCCTGGAGATCGAGTACCTGGAGGAACAGTGCCTG  
AAGATGCTGGAGACCATCCAGGCCTCAGACGACAATGACACGGAGGCCACCATGGCC  
GATGGCGGGGCCGAGGAAGAAGAGG

>1275

CGAGTACCTGGAGGAACAGTGCCTGAAGATGCTGGAGACCATCCAGGCCTCAGACGA  
CAATGACACGGAGGCCACCATGGCCGATGGCGGGGCCGAGGAAGAAGAGGACCGCA  
AGGCTCGGTACCTCAAGAACATCTTCA

>1276

GATGCTGGAGACCATCCAGGCCTCAGACGACAATGACACGGAGGCCACCATGGCCGA  
TGGCGGGGCCGAGGAAGAAGAGGACCGCAAGGCTCGGTACCTCAAGAACATCTTCAT  
CTCGAAGCATTCCAGCGAGGAGAGTG

>1277

GACCATCCAGGCCTCAGACGACAATGACACGGAGGCCACCATGGCCGATGGCGGGGC  
CGAGGAAGAAGAGGACCGCAAGGCTCGGTACCTCAAGAACATCTTCATCTCGAAGCA  
TTCCAGCGAGGAGAGTGGGTATGCCA

>1278

TGACACGGAGGCCACCATGGCCGATGGCGGGGCCGAGGAAGAAGAGGACCGCAAGG  
CTCGGTACCTCAAGAACATCTTCATCTCGAAGCATTCCAGCGAGGAGAGTGGGTATGC  
CAGTGTGGCTGGACAGAGCCTCCCTG

>1279

GGCCGATGGCGGGGCCGAGGAAGAAGAGGACCGCAAGGCTCGGTACCTCAAGAACAT  
CTTCATCTCGAAGCATTCCAGCGAGGAGAGTGGGTATGCCAGTGTGGCTGGACAGAGC  
CTCCCTGGGCCCATGGTGGACCAGA

>1280

GGCCGAGGAAGAAGAGGACCGCAAGGCTCGGTACCTCAAGAACATCTTCATCTCGAA  
GCATTCCAGCGAGGAGAGTGGGTATGCCAGTGTGGCTGGACAGAGCCTCCCTGGGCC  
CATGGTGGACCAGAGCCCTTCAGTCT

>1281

GTACCTCAAGAACATCTTCATCTCGAAGCATTCCAGCGAGGAGAGTGGGTATGCCAGT  
GTGGCTGGACAGAGCCTCCCTGGGCCCATGGTGGACCAGAGCCCTTCAGTCTCCACTT  
CATTTGGTCTTTCAGCCATGAGTC

>1282

ACCTCAAGAACATCTTCATCTCGAAGCATTCCAGCGAGGAGAGTGGGTATGCCAGTGT  
GGCTGGACAGAGCCTCCCTGGGCCCATGGTGGACCAGAGCCCTTCAGTCTCCACTTCA  
TTTGGTCTTTCAGCCATGAGTCCC

>1283

GCATTCCAGCGAGGAGAGTGGGTATGCCAGTGTGGCTGGACAGAGCCTCCCTGGGCC  
CATGGTGGACCAGAGCCCTTCAGTCTCCACTTCATTTGGTCTTTCAGCCATGAGTCCCA  
CCAAGGCTGCAGTGGACAGTTTGA

>1284

GCTGGACAGAGCCTCCCTGGGCCCATGGTGGACCAGAGCCCTTCAGTCTCCACTTCAT  
TTGGTCTTTTCAGCCATGAGTCCCACCAAGGCTGCAGTGGACAGTTTGATGACCATAGG  
ACAGTCTCTCCTGCAGGGAAGTCT

>1285

AGAGCCTCCCTGGGCCCATGGTGGACCAGAGCCCTTCAGTCTCCACTTCATTTGGTCTT  
TCAGCCATGAGTCCCACCAAGGCTGCAGTGGACAGTTTGATGACCATAGGACAGTCTC  
TCCTGCAGGGAAGTCTTCAGCCA

>1286

TGGGCCCATGGTGGACCAGAGCCCTTCAGTCTCCACTTCATTTGGTCTTTTCAGCCATGA  
GTCCCACCAAGGCTGCAGTGGACAGTTTGATGACCATAGGACAGTCTCTCCTGCAGGG  
AACTCTTCAGCCACCTGCAGGGC

>1287

GTCTCCACTTCATTTGGTCTTTTCAGCCATGAGTCCCACCAAGGCTGCAGTGGACAGTTT  
GATGACCATAGGACAGTCTCTCCTGCAGGGAAGTCTTCAGCCACCTGCAGGGCCCGAG  
GAGCCAAGTCTGGCTGGGGGTGG

>1288

TCTTTTCAGCCATGAGTCCCACCAAGGCTGCAGTGGACAGTTTGATGACCATAGGACAG  
TCTCTCCTGCAGGGAAGTCTTCAGCCACCTGCAGGGCCCGAGGAGCCAAGTCTGGCTG  
GGGGTGGGCGGCACCCTGGGGTGG

>1289

GAGTCCCACCAAGGCTGCAGTGGACAGTTTGATGACCATAGGACAGTCTCTCCTGCAG  
GGAAGTCTTCAGCCACCTGCAGGGCCCGAGGAGCCAAGTCTGGCTGGGGGTGGGCGG  
CACCTGGGGTGGCTGAGGTGAAGA

>1290

AGTGGACAGTTTGATGACCATAGGACAGTCTCTCCTGCAGGGAAGTCTTCAGCCACCT  
GCAGGGCCCGAGGAGCCAAGTCTGGCTGGGGGTGGGCGGCACCCTGGGGTGGCTGA  
GGTGAAGACGGAGATGATGCAGGTGG

>1291

TCTTCAGCCACCTGCAGGGCCCGAGGAGCCAAGTCTGGCTGGGGGTGGGCGGCACCC  
TGGGGTGGCTGAGGTGAAGACGGAGATGATGCAGGTGGATGAGGTGCCAGCCAGGA  
CAGCCCTGGGGCAGCCGAGTCCAGCA

>1292

GCCACCTGCAGGGCCCGAGGAGCCAAGTCTGGCTGGGGGTGGGCGGCACCCTGGGGT  
GGCTGAGGTGAAGACGGAGATGATGCAGGTGGATGAGGTGCCAGCCAGGACAGCCC  
TGGGGCAGCCGAGTCCAGCATCTCAG

>1293

CTGGGGGTGGGCGGCACCCTGGGGTGGCTGAGGTGAAGACGGAGATGATGCAGGTGG  
ATGAGGTGCCAGCCAGGACAGCCCTGGGGCAGCCGAGTCCAGCATCTCAGGAGGGA  
TGGGGGACAAGGTTGAGGAAAGAGGC

>1294

GGGTGGGCGGCACCCTGGGGTGGCTGAGGTGAAGACGGAGATGATGCAGGTGGATGA  
GGTGCCAGCCAGGACAGCCCTGGGGCAGCCGAGTCCAGCATCTCAGGAGGGATGGG  
GGACAAGGTTGAGGAAAGAGGCAAAG

>1295

GGCGGCACCCTGGGGTGGCTGAGGTGAAGACGGAGATGATGCAGGTGGATGAGGTGC

CCAGCCAGGACAGCCCTGGGGCAGCCGAGTCCAGCATCTCAGGAGGGATGGGGGACA  
AGGTTGAGGAAAGAGGCAAAGAGGGG

>1296

GGCTGAGGTGAAGACGGAGATGATGCAGGTGGATGAGGTGCCAGCCAGGACAGCCC  
TGGGGCAGCCGAGTCCAGCATCTCAGGAGGGATGGGGGACAAGGTTGAGGAAAGAG  
GCAAAGAGGGGCCTGGGACCCCGACTC

>1297

GGATGAGGTGCCAGCCAGGACAGCCCTGGGGCAGCCGAGTCCAGCATCTCAGGAGG  
GATGGGGGACAAGGTTGAGGAAAGAGGCAAAGAGGGGCCTGGGACCCCGACTCGAA  
GCAGCGTCATCACCAGTGCTAGGGAGC

>1298

GGTGCCAGCCAGGACAGCCCTGGGGCAGCCGAGTCCAGCATCTCAGGAGGGATGGG  
GGACAAGGTTGAGGAAAGAGGCAAAGAGGGGCCTGGGACCCCGACTCGAAGCAGCG  
TCATCACCAGTGCTAGGGAGCTACACT

>1299

CCAGCCAGGACAGCCCTGGGGCAGCCGAGTCCAGCATCTCAGGAGGGATGGGGGACA  
AGGTTGAGGAAAGAGGCAAAGAGGGGCCTGGGACCCCGACTCGAAGCAGCGTCATC  
ACCAGTGCTAGGGAGCTACACTATGGG

>1300

GACAGCCCTGGGGCAGCCGAGTCCAGCATCTCAGGAGGGATGGGGGACAAGGTTGAG  
GAAAGAGGCAAAGAGGGGCCTGGGACCCCGACTCGAAGCAGCGTCATCACCAGTGCT  
AGGGAGCTACACTATGGGCGAGAGGA

>1301

GCATCTCAGGAGGGATGGGGGACAAGGTTGAGGAAAGAGGCAAAGAGGGGCCTGGG  
ACCCCGACTCGAAGCAGCGTCATCACCAGTGCTAGGGAGCTACACTATGGGCGAGAG  
GAGAGTGCCGAGCAGGTGCCACCCCA

>1302

ACAAGGTTGAGGAAAGAGGCAAAGAGGGGCCTGGGACCCCGACTCGAAGCAGCGTC  
ATCACCAGTGCTAGGGAGCTACACTATGGGCGAGAGGAGAGTGCCGAGCAGGTGCCA  
CCCCAGCTGAGGCTGGCCAGGCCCCC

>1303

GGTTGAGGAAAGAGGCAAAGAGGGGCCTGGGACCCCGACTCGAAGCAGCGTCATCA  
CCAGTGCTAGGGAGCTACACTATGGGCGAGAGGAGAGTGCCGAGCAGGTGCCACCCC  
CAGCTGAGGCTGGCCAGGCCCCACTG

>1304

AAAGAGGGCCTGGGACCCCGACTCGAAGCAGCGTCATCACCAGTGCTAGGGAGCTA  
CACTATGGGCGAGAGGAGAGTGCCGAGCAGGTGCCACCCCACTGAGGCTGGCCAG  
GCCCCACTGGCCGACCTGAGCACCC

>1305

GACCCCGACTCGAAGCAGCGTCATCACCAGTGCTAGGGAGCTACACTATGGGCGAGA  
GGAGAGTGCCGAGCAGGTGCCACCCCACTGAGGCTGGCCAGGCCCCACTGGCCG  
ACCTGAGCACCCAGCACCCCGCCTG

>1306

TGCTAGGGAGCTACACTATGGGCGAGAGGAGAGTGCCGAGCAGGTGCCACCCCACTG  
TGAGGCTGGCCAGGCCCCACTGGCCGACCTGAGCACCCAGCACCCCGCCTGAGAA  
GCATCTGGGCATCTACTCCGTGTTGC

>1307

GCGAGAGGAGAGTGCCGAGCAGGTGCCACCCCACTGAGGCTGGCCAGGCCCA  
CTGGCCGACCTGAGCACCCAGCACCCCGCCTGAGAAGCATCTGGGCATCTACTCCGT  
GTTGCCCAACCACAAGGCTGACGCTG

>1308

GGTGCCACCCCACTGAGGCTGGCCAGGCCCACTGGCCGACCTGAGCACCCAGC  
ACCCCGCCTGAGAAGCATCTGGGCATCTACTCCGTGTTGCCAACCACAAGGCTGAC  
GCTGTATTGAGCATGCCGTCTTCCG

>1309

CCGACCTGAGCACCCAGCACCCCGCCTGAGAAGCATCTGGGCATCTACTCCGTGTTG  
CCCAACCACAAGGCTGACGCTGTATTGAGCATGCCGTCTTCCGTGACCTCTGGCCTCC  
ACGTGCAGCCTGCCCTGGCTGTCT

>1310

CACCCCGCCTGAGAAGCATCTGGGCATCTACTCCGTGTTGCCAACCACAAGGCTGA  
CGTGATTGAGCATGCCGTCTTCCGTGACCTCTGGCCTCCACGTGCAGCCTGCCCTGG  
CTGTCTCCATGGACTTCAGCACC

>1311

GTTGCCAACCACAAGGCTGACGCTGTATTGAGCATGCCGTCTTCCGTGACCTCTGGC  
CTCCACGTGCAGCCTGCCCTGGCTGTCTCCATGGACTTCAGCACCTATGGGGGGCTGC  
TGCCCCAGGGCTTCATCCAGAGGG

>1312

TGAGCATGCCGTCTTCCGTGACCTCTGGCCTCCACGTGCAGCCTGCCCTGGCTGTCTCC  
ATGGACTTCAGCACCTATGGGGGGCTGCTGCCCCAGGGCTTCATCCAGAGGGAGCTGT  
TCAGCAAGCTGGGGGAGCTGGCT

>1313

TGGCCTCCACGTGCAGCCTGCCCTGGCTGTCTCCATGGACTTCAGCACCTATGGGGGG  
CTGCTGCCCCAGGGCTTCATCCAGAGGGAGCTGTTAGCAAGCTGGGGGAGCTGGCT  
GTGGGCATGAAGTCAGAGAGCCGGA

>1314

GCAGCCTGCCCTGGCTGTCTCCATGGACTTCAGCACCTATGGGGGGCTGCTGCCCCAG  
GGCTTCATCCAGAGGGAGCTGTTAGCAAGCTGGGGGAGCTGGCTGTGGGCATGAAG  
TCAGAGAGCCGGACCATCGGAGAGC

>1315

CTCCATGGACTTCAGCACCTATGGGGGGCTGCTGCCCCAGGGCTTCATCCAGAGGGAG  
CTGTTAGCAAGCTGGGGGAGCTGGCTGTGGGCATGAAGTCAGAGAGCCGGACCATC  
GGAGAGCAGTGCAGCGTGTGTGGGG

>1316

GCTGCTGCCCCAGGGCTTCATCCAGAGGGAGCTGTTAGCAAGCTGGGGGAGCTGGC  
TGTGGGCATGAAGTCAGAGAGCCGGACCATCGGAGAGCAGTGCAGCGTGTGTGGGGT  
CGAGCTTCTGATAACGAGGCTGTGG

>1317

CTGCCCCAGGGCTTCATCCAGAGGGAGCTGTTAGCAAGCTGGGGGAGCTGGCTGTG  
GGCATGAAGTCAGAGAGCCGGACCATCGGAGAGCAGTGCAGCGTGTGTGGGGTTCGAG  
CTTCTGATAACGAGGCTGTGGAGCA

>1318

CAGAGGGAGCTGTTAGCAAGCTGGGGGAGCTGGCTGTGGGCATGAAGTCAGAGAGC

CGGACCATCGGAGAGCAGTGCAGCGTGTGTGGGGTCGAGCTCCTGATAACGAGGCT  
GTGGAGCAGCACAGGTAGGCCCGCT

>1319

GGAGCTGGCTGTGGGCATGAAGTCAGAGAGCCGGACCATCGGAGAGCAGTGCAGCGT  
GTGTGGGGTCGAGCTCCTGATAACGAGGCTGTGGAGCAGCACAGGTAGGCCCGCT  
CCAGCCCCGCACCTGATGTAGGACTT

>1320

CATGAAGTCAGAGAGCCGGACCATCGGAGAGCAGTGCAGCGTGTGTGGGGTCGAGCT  
TCCTGATAACGAGGCTGTGGAGCAGCACAGGTAGGCCCGCTCCAGCCCCGCACCTGA  
TGTAGGACTTGAGGCCCTCACACCC

>1321

AGAGAGCCGGACCATCGGAGAGCAGTGCAGCGTGTGTGGGGTCGAGCTCCTGATAA  
CGAGGCTGTGGAGCAGCACAGGTAGGCCCGCTCCAGCCCCGCACCTGATGTAGGAC  
TTGAGGCCCTCACACCCCTCCTCAC

>1322

GTGCAGCGTGTGTGGGGTCGAGCTCCTGATAACGAGGCTGTGGAGCAGCACAGGTA  
GGCCCCGCTCCAGCCCCGCACCTGATGTAGGACTTGAGGCCCTCACACCCCTCCTCA  
CACCTGGCTGCTCCCAAGTTAGGG

>1323

TCGAGCTCCTGATAACGAGGCTGTGGAGCAGCACAGGTAGGCCCGCTCCAGCCCCG  
CACCTGATGTAGGACTTGAGGCCCTCACACCCCTCCTTCACACCCTGGCTGCTCCCAA  
GTTAGGGGCCTGGCTCCCCTGTCT

>1324

CCTGATAACGAGGCTGTGGAGCAGCACAGGTAGGCCCGCTCCAGCCCCGCACCTGAT  
GTAGGACTTGAGGCCCTCACACCCCTCCTTCACACCCTGGCTGCTCCCAAGTTAGGGG  
CCTGGCTCCCCTGTCTTGGAATT

>1325

CTCCAGCCCCGCACCTGATGTAGGACTTGAGGCCCTCACACCCCTCCTTCACACCCTG  
GCTGCTCCCAAGTTAGGGGCCTGGCTCCCCTGTCTTGGAATTTGTGAAAAAACCAGA  
AACTTCTTCTAAAGTTCTGGCGG

>1326

CCTTCACACCCTGGCTGCTCCCAAGTTAGGGGCCTGGCTCCCCTGTCTTGGAATTTGT  
GAAAAAACCAGAACTTCTTCTAAAGTTCTGGCGGGGAGGGGAGCAGGTTTTTTAA  
AGTGTAGTGAGGGGGCCTAGGATC

>1327

GCTCCCAAGTTAGGGGCCTGGCTCCCCTGTCTTGGAATTTGTGAAAAAACCAGAACA  
CTTCTTCTAAAGTTCTGGCGGGGAGGGGAGCAGGTTTTTTAAAGTGTAGTGAGGGGGC  
CTAGGATCTTTCCAAAAGCACCA

>1328

GGGCCTGGCTCCCCTGTCTTGGAATTTGTGAAAAAACCAGAACTTCTTCTAAAGT  
TCTGGCGGGGAGGGGAGCAGGTTTTTTAAAGTGTAGTGAGGGGGCCTAGGATCTTTCC  
AAAAAGCACAGGGGACACTCATG

>1329

TGGCTCCCCTGTCTTGGAATTTGTGAAAAAACCAGAACTTCTTCTAAAGTTCTGG  
CGGGGAGGGGAGCAGGTTTTTTAAAGTGTAGTGAGGGGGCCTAGGATCTTTCCAAA  
AGCACAGGGGACACTCATGGGCGC

>1330

TGGCAATTTGTGAAAAAACCAGAACACTTCTTCTAAAGTTCTGGCGGGGAGGGGAGC  
AGGTTTTTTAAAGTGTAGTGAGGGGGCCTAGGATCTTCCAAAAAGCACCAGGGGACA  
CTCATGGGCGCAGCTTCTTAATAGG

>1331

TCTGGCGGGGAGGGGAGCAGGTTTTTTAAAGTGTAGTGAGGGGGCCTAGGATCTTTCC  
AAAAAGCACCAGGGGACACTCATGGGCGCAGCTTCTTAATAGGCCCTTCCCTTTGTTT  
TTTGCTTTTGGGCCCTGTTTGTT

>1332

GGTTTTTTAAAGTGTAGTGAGGGGGCCTAGGATCTTCCAAAAAGCACCAGGGGACAC  
TCATGGGCGCAGCTTCTTAATAGGCCCTTCCCTTTGTTTTTTGCTTTTGGGCCCTGTTT  
GTTTTTTCTGCTGTTTGGTCTG

>1333

GTGTAGTGAGGGGGCCTAGGATCTTCCAAAAAGCACCAGGGGACACTCATGGGCGC  
AGCTTCTTAATAGGCCCTTCCCTTTGTTTTTTGCTTTTGGGCCCTGTTGTTTTTTCTGC  
TGTTTGGTCTGTTCTCCTTTC

>1334

CCCTTTGTTTTTCTGTTTTGGGCCCTGTTGTTTTTTCTGCTGTTTGGTCTGTTCTCCTT  
TGCTTGAGTGACTGATAAATGGAGAGAAGGAGAAAAGGAGTGGGATGAGGGTCTC  
TTGGGCCCTGCATCTGACCATG

>1335

TTGGGCCCTGTTTGTGTTTTTCTGCTGTTTGGTCTGTTCTCCTTTGCTTGGAGTGACTGA  
TAAAATGGAGAGAAGGAGAAAAGGAGTGGGATGAGGGTCTTTGGGCCCTGCATCTG  
ACCATGTTACTAGGTTTCAGGTC

>1336

GGGCCCTGTTTGTGTTTTTCTGCTGTTTGGTCTGTTCTCCTTTGCTTGGAGTGACTGATA  
AAATGGAGAGAAGGAGAAAAGGAGTGGGATGAGGGTCTTTGGGCCCTGCATCTGAC  
CATGTTACTAGGTTTCAGGTCCT

>1337

TGTTTTTCTGCTGTTTGGTCTGTTCTCCTTTGCTTGGAGTGACTGATAAATGGAGAG  
AAGGAGAAAAGGAGTGGGATGAGGGTCTTTGGGCCCTGCATCTGACCATGTTACTAG  
GTTTCAGGTCCTCGGGTTCCCAT

>1338

TAAAATGGAGAGAAGGAGAAAAGGAGTGGGATGAGGGTCTTTGGGCCCTGCATCTG  
ACCATGTTACTAGGTTTCAGGTCCTCGGGTTCCCATGCAGTGGTCCCTGTGAAGACAG  
CCTGTCCCTTTCTGCAGCTTGGGAG

>1339

GAGAGAAGGAGAAAAGGAGTGGGATGAGGGTCTTTGGGCCCTGCATCTGACCATGT  
TACTAGGTTTCAGGTCCTCGGGTTCCCATGCAGTGGTCCCTGTGAAGACAGCCTGTCC  
CTTCTGCAGCTTGGGAGAATGGGA

>1340

GGGATGAGGGTCTTTGGGCCCTGCATCTGACCATGTTACTAGGTTTCAGGTCCTCGGG  
TTCCCATGCAGTGGTCCCTGTGAAGACAGCCTGTCCCTTTCTGCAGCTTGGGAGAATG  
GGAGGGTCTGGGGGCTGCTTAAG

>1341

GTTACTAGGTTTCAGGTCCTCGGGTTCCCATGCAGTGGTCCCTGTGAAGACAGCCTGT

CCCTTTCTGCAGCTTGGGAGAATGGGAGGGTCTGGGGGCTGCTTAAGCCACAAGAGC  
AGCTGCAGGTTCTGAACCTTATTCC

>1342

GTTTCAGGTCTCGGGTTCCCATGCAGTGGTCCCTGTGAAGACAGCCTGTCCCTTCTG  
CAGCTTGGGAGAATGGGAGGGTCTGGGGGCTGCTTAAGCCACAAGAGCAGCTGCAGG  
TTCTGAACCTTATTCTGGTAAA

>1343

TGGTCCCTGTGAAGACAGCCTGTCCCTTCTGCAGCTTGGGAGAATGGGAGGGTCTGG  
GGGCTGCTTAAGCCACAAGAGCAGCTGCAGGTTCTGAACCTTATTCTGGTAAAAGTT  
AATCTCCTTGCTCTGTCTCCCTC

>1344

CCTGTCCCTTCTGCAGCTTGGGAGAATGGGAGGGTCTGGGGGCTGCTTAAGCCACAA  
GAGCAGCTGCAGGTTCTGAACCTTATTCTGGTAAAAGTTAATCTCCTTGCTCTGTCTC  
CCTTCTATTCTCTGATCCTGCA

>1345

ATGGGAGGGTCTGGGGGCTGCTTAAGCCACAAGAGCAGCTGCAGGTTCTGAACCTTAT  
TCCTGGTAAAAGTTAATCTCCTTGCTCTGTCTCCCTTCTCATTCTCTGATCCTGCACATG  
CATTTAGGGGAATTGATTTAA

>1346

TATTCCTGGTAAAAGTTAATCTCCTTGCTCTGTCTCCCTTCTCATTCTCTGATCCTGCAC  
ATGCATTTAGGGGAATTGATTTAAATGCAAGGGAAAGGATGGGTATAAGAGTCTTG  
GTCTGCAGCCTGTGAAGTCTC

>1347

CCTTGCTCTGTCTCCCTTCTCATTCTCTGATCCTGCACATGCATTTAGGGGAATTGATT  
TAAATGCAAGGGGAAGGATGGGTATAAGAGTCTTGGTCTTGACAGCCTGTGAAGTCTC  
ATTCTTATCCCATCTCTGCTCA

>1348

TCATTCTCTGATCCTGCACATGCATTTAGGGGAATTGATTTAAATGCAAGGGAAAGG  
ATGGGTATAAGAGTCTTGGTCTTGACAGCCTGTGAAGTCTCATTCTTATCCCATCTCTGCT  
CACACTGAACTAAATGCCGCT

>1349

ATTCTCTGATCCTGCACATGCATTTAGGGGAATTGATTTAAATGCAAGGGAAAGGAT  
GGGTATAAGAGTCTTGGTCTTGACAGCCTGTGAAGTCTCATTCTTATCCCATCTCTGCTCA  
CACTGAACTAAATGCCGCTC

>1350

CACATGCATTTAGGGGAATTGATTTAAATGCAAGGGAAAGGATGGGTATAAGAGTC  
TTGGTCTTGACAGCCTGTGAAGTCTCATTCTTATCCCATCTCTGCTCACACTGAACTAAAT  
GCCGCTTCAGGCTAGCATTGGC

>1351

TTGGTCTTGACAGCCTGTGAAGTCTCATTCTTATCCCATCTCTGCTCACACTGAACTAAAT  
GCCGCTTCAGGCTAGCATTGGCTCCCTCCGGCTCCGTTTCCTTCTCTATGAAATAACC  
ATTCATTGAGCTCTTATGAC

>1352

CTTGACAGCCTGTGAAGTCTCATTCTTATCCCATCTCTGCTCACACTGAACTAAATGCCG  
CTTCAGGCTAGCATTGGCTCCCTCCGGCTCCGTTTCCTTCTCTATGAAATAACCATTTC  
ATTGAGCTCTTATGACATGTT



>1353

GCCGCTTAGCATTGGCTCCCTCCGGCTCCGTTTCCTTCTCTATGAAATAACC  
ATTCATTGAGCTCTTATGACATGTTGGTTCAGTACTAAGCACTTCCATGAGTTGCATT  
TTCATTACAACAGCCCTTG

>1354

TCCCTCCGGCTCCGTTTCCTTCTCTATGAAATAACCATTGAGCTCTTATGACATG  
TTTGGTTCAGTACTAAGCACTTCCATGAGTTGCATTTTCATTACAACAGCCCTTGAGA  
TAGGTAATGCCTTCTTTTT

>1355

TTCTCTATGAAATAACCATTGAGCTCTTATGACATGTTGGTTCAGTACTAAGCAC  
TTTCCATGAGTTGCATTTTCATTACAACAGCCCTTGAGATAGGTAATGCCTTCTTTTT  
TTTTTGGATGTGAAGTTTCG

>1356

CATTGAGCTCTTATGACATGTTGGTTCAGTACTAAGCACTTCCATGAGTTGCATTTTC  
ATTACAACAGCCCTTGAGATAGGTAATGCCTTCTTTTTTTTTTGGATGTGAAGTTTCG  
CTCTCCTTGCCAGGCTGGA

>1357

CTTATGACATGTTGGTTCAGTACTAAGCACTTCCATGAGTTGCATTTTCATTACAACA  
GCCCTTGAGATAGGTAATGCCTTCTTTTTTTTTTGGATGTGAAGTTTCGCTCTCCTTG  
CCCAGGCTGGAGTGCAATGG

>1358

ATGAGTTGCATTTTCATTACAACAGCCCTTGAGATAGGTAATGCCTTCTTTTTTTTTT  
GGATGTGAAGTTTCGCTCTCCTTGCCAGGCTGGAGTGCAATGGTGTGATCTCTGCTCA  
CCGCAACCTCTGCATCCCGGG

>1359

CAACAGCCCTTGAGATAGGTAATGCCTTCTTTTTTTTTTGGATGTGAAGTTTCGCTCT  
CCTTGCCAGGCTGGAGTGCAATGGTGTGATCTCTGCTCACCGCAACCTCTGCATCCC  
GGGTTAAGGTGATTCTCCTGCC

>1360

CTCTCCTTGCCAGGCTGGAGTGCAATGGTGTGATCTCTGCTCACCGCAACCTCTGCAT  
CCCGGGTTAAGGTGATTCTCCTGCCTCAGCCTCCCGAGTAGCTCGGATTACAGGCACG  
CACCACCATACTGGCTAATTTT

>1361

GAGTGCAATGGTGTGATCTCTGCTCACCGCAACCTCTGCATCCCGGGTTAAGGTGATTC  
TCCTGCCTCAGCCTCCCGAGTAGCTCGGATTACAGGCACGCACCACCATACTGGCTAA  
TTTTGAATTTTATAGTAGAGACG

>1362

CACCGCAACCTCTGCATCCCGGGTTAAGGTGATTCTCCTGCCTCAGCCTCCCGAGTAGC  
TCGGATTACAGGCACGCACCACCATACTGGCTAATTTTGAATTTTATAGTAGAGACGGG  
CTTTCACCGTGTGGTCAGGAT

>1363

TGCCTCAGCCTCCCGAGTAGCTCGGATTACAGGCACGCACCACCATACTGGCTAATTT  
TGAATTTTATAGTAGAGACGGGCTTTCACCGTGTGGTCAGGATGGTCTCGAACTCCCG  
ACCTCAGGTGATCGGCCTGCTTC

>1364

CAGGCACGCACCACCATACTGGCTAATTTTGAATTTTATAGTAGAGACGGGCTTTCACC

GTGTTGGTCAGGATGGTCTCGAACTCCCGACCTCAGGTGATCGGCCTGCTTCGGCCTC  
CCAAAGTGCTGGATTACAGGTAT

>1365

AATTTTGAATTTTATAGAGACGGGCTTTCACCGTGTGGTCAGGATGGTCTCGAACT  
CCCGACCTCAGGTGATCGGCCTGCTTCGGCCTCCCAAAGTGCTGGATTACAGGTATGA  
GCCACCGTGCCAGCTGGTAATG

>1366

TTCACCGTGTGGTCAGGATGGTCTCGAACTCCCGACCTCAGGTGATCGGCCTGCTTC  
GGCCTCCCAAAGTGCTGGATTACAGGTATGAGCCACCGTGCCAGCTGGTAATGTCCTT  
CTTTTACATGGAACAATACTAAG

>1367

TCAGGATGGTCTCGAACTCCCGACCTCAGGTGATCGGCCTGCTTCGGCCTCCCAAAGT  
GCTGGATTACAGGTATGAGCCACCGTGCCAGCTGGTAATGTCCTTCTTTTACATGGAA  
CAATACTAAGGCTCAGATGTCAA

>1368

GGTCTCGAACTCCCGACCTCAGGTGATCGGCCTGCTTCGGCCTCCCAAAGTGCTGGAT  
TACAGGTATGAGCCACCGTGCCAGCTGGTAATGTCCTTCTTTTACATGGAACAATACT  
AAGGCTCAGATGTCAAGTCTCTT

>1369

TGCTGGATTACAGGTATGAGCCACCGTGCCAGCTGGTAATGTCCTTCTTTTACATGGAA  
ACAATACTAAGGCTCAGATGTCAAGTCTCTTTTCTAGGGTCACATAGATAGTAAGAGGC  
AGAGCTGGATTCAAATTTAGGT

>1370

ATTACAGGTATGAGCCACCGTGCCAGCTGGTAATGTCCTTCTTTTACATGGAACAATA  
CTAAGGCTCAGATGTCAAGTCTCTTTTCTAGGGTCACATAGATAGTAAGAGGCAGAGCT  
GGATTCAAATTTAGGTCCTTAC

>1371

TGTCCAGCTGGTAATGTCCTTCTTTTACATGGAACAATACTAAGGCTCAGATGTCAAGT  
CTCTTTTCTAGGGTCACATAGATAGTAAGAGGCAGAGCTGGATTCAAATTTAGGTCCTT  
ACCCCTGGTACTTTGCTGCCT

>1372

TCTTTTACATGGAACAATACTAAGGCTCAGATGTCAAGTCTCTTTTCTAGGGTCACATA  
GATAGTAAGAGGCAGAGCTGGATTCAAATTTAGGTCCTTACCCCTGGTACTTTGCTGC  
CTCTTGGAGTCACTTAGACTTG

>1373

TTACATGGAACAATACTAAGGCTCAGATGTCAAGTCTCTTTTCTAGGGTCACATAGATA  
GTAAGAGGCAGAGCTGGATTCAAATTTAGGTCCTTACCCCTGGTACTTTGCTGCCTCT  
TGGAGTCACTTAGACTTGAAGA

>1374

ACATGGAACAATACTAAGGCTCAGATGTCAAGTCTCTTTTCTAGGGTCACATAGATAGT  
AAGAGGCAGAGCTGGATTCAAATTTAGGTCCTTACCCCTGGTACTTTGCTGCCTCTTG  
GAGTCACTTAGACTTGAAGAGG

>1375

AGGCTCAGATGTCAAGTCTCTTTTCTAGGGTCACATAGATAGTAAGAGGCAGAGCTGG  
ATTCAAATTTAGGTCCTTACCCCTGGTACTTTGCTGCCTCTTGGAGTCACTTAGACTTG  
AAGAGGATCATGTCTATGGAAC

>1376

TAGATAGTAAGAGGCAGAGCTGGATTCAAATTTAGGTCCTTACCCCCTGGTACTTTGCT  
GCCTCTTGGAGTCACTTAGACTTGAAGAGGATCATGTCTATGGAACAGAGCGTTTTGA  
AGATTGCTTATAGGAAGTGGAGT

>1377

AAGAGGCAGAGCTGGATTCAAATTTAGGTCCTTACCCCCTGGTACTTTGCTGCCTCTTG  
GAGTCACTTAGACTTGAAGAGGATCATGTCTATGGAACAGAGCGTTTTGAAGATTGCTT  
ATAGGAAGTGGAGTAAATAACA

>1378

GAGCTGGATTCAAATTTAGGTCCTTACCCCCTGGTACTTTGCTGCCTCTTGGAGTCACT  
TAGACTTGAAGAGGATCATGTCTATGGAACAGAGCGTTTTGAAGATTGCTTATAGGAAG  
TGGAGTAAATAACAGGGGGGAT

>1379

CCTTACCCCCTGGTACTTTGCTGCCTCTTGGAGTCACTTAGACTTGAAGAGGATCATGT  
CTATGGAACAGAGCGTTTTGAAGATTGCTTATAGGAAGTGGAGTAAATAACAGGGGGG  
ATAAGTAGCGAGTTTGT

>1380

CCTCTTGGAGTCACTTAGACTTGAAGAGGATCATGTCTATGGAACAGAGCGTTTTGAA  
GATTGCTTATAGGAAGTGGAGTAAATAACAGGGGGGATAAGTAGCGAGTTTGT  
TTTCCTTGCTTCTGTCATAAACC

>1381

TTGGAGTCACTTAGACTTGAAGAGGATCATGTCTATGGAACAGAGCGTTTTGAAGATT  
GCTTATAGGAAGTGGAGTAAATAACAGGGGGGATAAGTAGCGAGTTTGT  
CTTGCTTCTGTCATAAACCACGT

>1382

GTCACTTAGACTTGAAGAGGATCATGTCTATGGAACAGAGCGTTTTGAAGATTGCTTAT  
AGGAAGTGGAGTAAATAACAGGGGGGATAAGTAGCGAGTTTGT  
TCTGTCATAAACCACGTGCCCA

>1383

CTTGAAGAGGATCATGTCTATGGAACAGAGCGTTTTGAAGATTGCTTATAGGAAGTGG  
AGTAAATAACAGGGGGGATAAGTAGCGAGTTTGT  
ACCACGTGCCCATCATTTATC

>1384

ATCATGTCTATGGAACAGAGCGTTTTGAAGATTGCTTATAGGAAGTGGAGTAAATAACA  
GGGGGGATAAGTAGCGAGTTTGT  
CATCATTTATCCTCTAGTTTC

>1385

TAAGTAGCGAGTTTGT  
TATCCTCTAGTTTCTGGGTCAGATGAATGGAGTCAAGAAATCCAGCTTTCTGTTGTCAT  
TGACGACAGCATTGGCTGCA

>1386

TTGTTTTTTTCTGCTTCTGTCATAAACCACGTGCCCATCATTTATCCTCTAGTTT  
CTGGGTCAGATGAATGGAGTCAAGAAATCCAGCTTTCTGTTGTCATTGACGACAGCAT  
TTGGCTGCATACCCTGTGGTC

>1387

GTCATAAACCACGTGCCCATCATTTATCCTCTAGTTTCTGGGTCAGATGAATGGAGTCA

AGAAATCCAGCTTTCTGTTGTCATTGACGACAGCATTTGGCTGCATACCCTGTGGTCTG  
CTGTTTTGCTGATCTTGGGTG

>1388

TTTATCTCTAGTTTCTGGGTGAGATGAATGGAGTCAAGAAATCCAGCTTTCTGTTGTC  
ATTGACGACAGCATTTGGCTGCATACCCTGTGGTCTGCTGTTTTGCTGATCTTGGGTGG  
ATTCTCCACTTCTCCCCCTC

>1389

TGTTTTGCTGATCTTGGGTGGATTCTCCACTTCTCCCCCTCACCCCATTCCCCTGTT  
GCTCGTTCAGGTACGGGGGATGTGAGTGAGAGGGGTTGGGGTGGGGATATCTGGAAG  
TTGATCTCATCACCCCTAGCCGG

>1390

GGTGGATTCTCCACTTCTCCCCCTCACCCCATTCCCCTGTTGCTCGTTCAGGTACG  
GGGGATGTGAGTGAGAGGGGTTGGGGTGGGGATATCTGGAAGTTGATCTCATCACCCC  
TAGCCGGAATCTGCTCTGACCCT

>1391

CCATTCCCCTGTTGCTCGTTCAGGTACGGGGGATGTGAGTGAGAGGGGTTGGGGTGGG  
GATATCTGGAAGTTGATCTCATCACCCCTAGCCGGAATCTGCTCTGACCCTGCCTCCTC  
GACAGCTCAGAGGCTTAACTTGT

>1392

TCAGGTACGGGGGATGTGAGTGAGAGGGGTTGGGGTGGGGATATCTGGAAGTTGATCT  
CATCACCCCTAGCCGGAATCTGCTCTGACCCTGCCTCCTCGACAGCTCAGAGGCTTAA  
CTTGTGGAAAGTGTGGCAGAGCTA

>1393

GGTGGGGATATCTGGAAGTTGATCTCATCACCCCTAGCCGGAATCTGCTCTGACCCTGC  
CTCCTCGACAGCTCAGAGGCTTAACTTGTGGAAAGTGTGGCAGAGCTAAACGTAGCCG  
ACTTTTTCCAGTGGGTGCGAAAA

>1394

TCATCACCCCTAGCCGGAATCTGCTCTGACCCTGCCTCCTCGACAGCTCAGAGGCTTAA  
CTTGTGGAAAGTGTGGCAGAGCTAAACGTAGCCGACTTTTTCCAGTGGGTGCGAAAAA  
TAACCGCCACTAAGGTGTGTCTT

>1395

CCTAGCCGGAATCTGCTCTGACCCTGCCTCCTCGACAGCTCAGAGGCTTAACTTGTGG  
AAAGTGTGGCAGAGCTAAACGTAGCCGACTTTTTCCAGTGGGTGCGAAAAATAACCGC  
CACTAAGGTGTGTCTTCTTGATGC

>1396

CTGCTCTGACCCTGCCTCCTCGACAGCTCAGAGGCTTAACTTGTGGAAAGTGTGGCAG  
AGCTAAACGTAGCCGACTTTTTCCAGTGGGTGCGAAAAATAACCGCCACTAAGGTGTG  
TCTTCTTGATGCTTGTACCGCTCA

>1397

TGTGGAAAGTGTGGCAGAGCTAAACGTAGCCGACTTTTTCCAGTGGGTGCGAAAAATA  
ACCGCCACTAAGGTGTGTCTTCTTGATGCTTGTACCGCTCAGAAATAGACTGAGGTTAT  
GTTTGTGTTTTGCTCAAACCTTCC

>1398

CGACTTTTTCCAGTGGGTGCGAAAAATAACCGCCACTAAGGTGTGTCTTCTTGATGCTT  
GTACCGCTCAGAAATAGACTGAGGTTATGTTGTTTTGCTCAAACCTTCTAAAGAGG  
AAACCGCTCCCCAAAGTTGAC

>1399

TCTTCTTGATGCTTGACCGCTCAGAAATAGACTGAGGTTATGTTTGTGTTTTGCTCAAAC  
TTTCTAAAGAGGAAACCCGCTCCCCAAAGTTGACCAGATAGATGTATCATCTTTCCGG  
ATGTGAATTATTTCCGGCTGTG

>1400

TTCTTGATGCTTGACCGCTCAGAAATAGACTGAGGTTATGTTTGTGTTTTGCTCAAACCTT  
TCCTAAAGAGGAAACCCGCTCCCCAAAGTTGACCAGATAGATGTATCATCTTTCCGGAT  
GTGAATTATTTCCGGCTGTGTG

>1401

CTGAGGTTATGTTTGTGTTTTGCTCAAACCTTCTAAAGAGGAAACCCGCTCCCCAAAGT  
TGACCAGATAGATGTATCATCTTTCCGGATGTGAATTATTTCCGGCTGTGTGCTATGAGAA  
CTGGGTATGGTGGGAAGTAAT

>1402

GCTCCCCAAAGTTGACCAGATAGATGTATCATCTTTCCGGATGTGAATTATTTCCGGCTGT  
GTGCTATGAGAACTGGGTATGGTGGGAAGTAATTGTTTTCTGGCTCTCATCAGGTCCT  
GGTTCCTGGTTGCTTTTCTTT

>1403

ATAGATGTATCATCTTTCCGGATGTGAATTATTTCCGGCTGTGTGCTATGAGAACTGGGTA  
TGGTGGGAAGTAATTGTTTTCTGGCTCTCATCAGGTCCTGGTTCCTGGTTGCTTTTCTT  
TACCCGAGAGGGCCACAAAA

>1404

GAATTATTTCCGGCTGTGTGCTATGAGAACTGGGTATGGTGGGAAGTAATTGTTTTCTG  
GCTCTCATCAGGTCCTGGTTCCTGGTTGCTTTTCTTTACCCGAGAGGGCCACAAAAGAT  
ACCACTCTCCTGAGACTTCCAA

>1405

TATGGTGGGAAGTAATTGTTTTCTGGCTCTCATCAGGTCCTGGTTCCTGGTTGCTTTTC  
TTTACCCGAGAGGGCCACAAAAGATAACCACTCTCCTGAGACTTCCAAGTTCCCCTTCA  
GCAAGACCCTCATTCTCTGGG

>1406

TGGTGGGAAGTAATTGTTTTCTGGCTCTCATCAGGTCCTGGTTCCTGGTTGCTTTTCTT  
TACCCGAGAGGGCCACAAAAGATAACCACTCTCCTGAGACTTCCAAGTTCCCCTCAGC  
AAGACCCTCATTCTCTGGGGA

>1407

AATTGTTTTCTGGCTCTCATCAGGTCCTGGTTCCTGGTTGCTTTTCTTTACCCGAGAGG  
GCCACAAAAGATAACCACTCTCCTGAGACTTCCAAGTTCCCCTCAGCAAGACCCTCAT  
TCCTCTGGGGAGAGAGGGGAGAG

>1408

CTCATCAGGTCCTGGTTCCTGGTTGCTTTTCTTTACCCGAGAGGGCCACAAAAGATAACC  
ACTCTCCTGAGACTTCCAAGTTCCCCTCAGCAAGACCCTCATTCTCTGGGGAGAGA  
GGGAGAGTTGGCCATGTTATATT

>1409

GCCACAAAAGATAACCACTCTCCTGAGACTTCCAAGTTCCCCTCAGCAAGACCCTCAT  
TCCTCTGGGGAGAGAGGGGAGAGTTGGCCATGTTATATTGAAAGAGCCTGGGTATTGG  
AATTGGCCATATTTAGTGGTGAGA

>1410

CACAAAAGATAACCACTCTCCTGAGACTTCCAAGTTCCCCTCAGCAAGACCCTCATTC

CTCTGGGGAGAGAGGGGAGAGTTGGCCATGTTATATTGAAAGAGCCTGGGTATTGGAA  
TTGGCCATATTTAGTGGTGAGAGC

>1411

AAGTTCCCCTTCAGCAAGACCCTCATTCTCTGGGGAGAGAGGGGAGAGTTGGCCATGT  
TATATTGAAAGAGCCTGGGTATTGGAATTGGCCATATTTAGTGGTGAGAGCCTGTGAT  
ACTTATTTAACCTTTCTGGGCCT

>1412

CTGGGGAGAGAGGGGAGAGTTGGCCATGTTATATTGAAAGAGCCTGGGTATTGGAATT  
GGCCATATTTAGTGGTGAGAGCCTGTGATACTTATTTAACCTTTCTGGGCCTGTTTCAC  
TCACTACATTTTTTTTTTTTTTTT

>1413

GAGAGGGGAGAGTTGGCCATGTTATATTGAAAGAGCCTGGGTATTGGAATTGGCCATAT  
TTAGTGGTGAGAGCCTGTGATACTTATTTAACCTTTCTGGGCCTGTTTCACTACTACA  
TTTTTTTTTTTTTTTTTTTTTTT

>1414

CTGTGATACTTATTTAACCTTTCTGGGCCTGTTTCACTACTACATTTTTTTTTTTTTTTT  
TTTTTTGAGACGGAGTCTCGCTCTGTCACCGGGCTGGAGTGCAATGGCGTGATCTCAG  
CTCACTGCAGTCTCCACCTCC

>1415

TACTTATTTAACCTTTCTGGGCCTGTTTCACTACTACATTTTTTTTTTTTTTTTTTTTGG  
AGACGGAGTCTCGCTCTGTCACCGGGCTGGAGTGCAATGGCGTGATCTCAGCTCACTG  
CAGTCTCCACCTCCCGGGTT

>1416

TGTTTCACTACTACATTTTTTTTTTTTTTTTTTTTGGAGACGGAGTCTCGCTCTGTCAC  
CGGGCTGGAGTGCAATGGCGTGATCTCAGCTCACTGCAGTCTCCACCTCCCGGGTTCA  
AGCGATTCTCCTGCCTCAGCCT

>1417

TTTTTTTTTTTTTTTTTTGAGACGGAGTCTCGCTCTGTCACCGGGCTGGAGTGCAATGG  
CGTGATCTCAGCTCACTGCAGTCTCCACCTCCCGGGTTCAAGCGATTCTCCTGCCTCAG  
CCTCCTGAGTAGCTGGGACTAC

>1418

TTTTTTTTGAGACGGAGTCTCGCTCTGTCACCGGGCTGGAGTGCAATGGCGTGATCTC  
AGCTCACTGCAGTCTCCACCTCCCGGGTTCAAGCGATTCTCCTGCCTCAGCCTCCTGA  
GTAGCTGGGACTACAGGCACCTGT

>1419

GAGTGCAATGGCGTGATCTCAGCTCACTGCAGTCTCCACCTCCCGGGTTCAAGCGATT  
CTCCTGCCTCAGCCTCCTGAGTAGCTGGGACTACAGGCACCTGTCACCCCGCCCAGCT  
AATTTTTTGTATTTTAGTAGAGA

>1420

GGCGTGATCTCAGCTCACTGCAGTCTCCACCTCCCGGGTTCAAGCGATTCTCCTGCCTC  
AGCCTCCTGAGTAGCTGGGACTACAGGCACCTGTCACCCCGCCCAGCTAATTTTTTTGTA  
TTTTTAGTAGAGACAGGGTTTC

>1421

GGGTTCAAGCGATTCTCCTGCCTCAGCCTCCTGAGTAGCTGGGACTACAGGCACCTGT  
CACCCCGCCCAGCTAATTTTTTGTATTTTAGTAGAGACAGGGTTTACCATGTTGGCC  
AGAATGGTCTCGATCTCTTGACC

>1422

CCTCAGCCTCTGAGTAGCTGGGACTACAGGCACCTGTCACCCCGCCAGCTAATTTTT  
TGATTTTTAGTAGAGACAGGGTTTCACCATGTTGGCCAGAATGGTCTCGATCTCTTGA  
CCTTGCGATCCATCCACCTCGG

>1423

CAGCCTCTGAGTAGCTGGGACTACAGGCACCTGTCACCCCGCCAGCTAATTTTTTGT  
ATTTTTAGTAGAGACAGGGTTTCACCATGTTGGCCAGAATGGTCTCGATCTCTTGACCT  
TGCGATCCATCCACCTCGGCCT

>1424

GGCACCTGTCACCCCGCCAGCTAATTTTTGTATTTTTAGTAGAGACAGGGTTTCACC  
ATGTTGGCCAGAATGGTCTCGATCTCTTGACCTTGCGATCCATCCACCTCGGCCTCCCA  
AAGTGCTGGGATTACAGCTGTG

>1425

GTTTCACCATGTTGGCCAGAATGGTCTCGATCTCTTGACCTTGCGATCCATCCACCTCG  
GCCTCCAAAGTGCTGGGATTACAGCTGTGAGCCACCCCGCCCGCCTTCACTCACTT  
CTTAAAATGGAGACGGTCAACAG

>1426

GCCAGAATGGTCTCGATCTCTTGACCTTGCGATCCATCCACCTCGGCCTCCAAAGTGC  
TGGGATTACAGCTGTGAGCCACCCCGCCCGCCTTCACTCACTTCTTAAAATGGAGAC  
GGTCAACAGGGTTGGTGCTGAAT

>1427

GCCTCCAAAGTGCTGGGATTACAGCTGTGAGCCACCCCGCCCGCCTTCACTCACTT  
CTTAAAATGGAGACGGTCAACAGGGTTGGTGCTGAATTAATGAAGTAAGATCCAGAAA  
TCACTAGAGCTGTGATGGGCACAT

>1428

TGCTGGGATTACAGCTGTGAGCCACCCCGCCCGCCTTCACTCACTTCTTAAAATGGA  
GACGGTCAACAGGGTTGGTGCTGAATTAATGAAGTAAGATCCAGAAATCACTAGAGCT  
GTGATGGGCACATAGTCACCGCAG

>1429

CACCCCGCCCGCCTTCACTCACTTCTTAAAATGGAGACGGTCAACAGGGTTGGTGCT  
GAATTAATGAAGTAAGATCCAGAAATCACTAGAGCTGTGATGGGCACATAGTCACCGC  
AGCGGTGGAGAACTGACCATCTGT

>1430

CCGCCCGCCTTCACTCACTTCTTAAAATGGAGACGGTCAACAGGGTTGGTGCTGAAT  
TAATGAAGTAAGATCCAGAAATCACTAGAGCTGTGATGGGCACATAGTCACCGCAGCG  
GTGGAGAACTGACCATCTGTCCCT

>1431

CACTTCTTAAAATGGAGACGGTCAACAGGGTTGGTGCTGAATTAATGAAGTAAGATCC  
AGAAATCACTAGAGCTGTGATGGGCACATAGTCACCGCAGCGGTGGAGAACTGACCAT  
CTGTCCCTTGTGTTGTTTAGGCCT

>1432

GGTTGGTGCTGAATTAATGAAGTAAGATCCAGAAATCACTAGAGCTGTGATGGGCACAT  
AGTCACCGCAGCGGTGGAGAACTGACCATCTGTCCCTTGTGTTGTTTAGGCCTCATCTC  
TGCATGGTCCTCATTGGCTCTG

>1433

CTGAATTAATGAAGTAAGATCCAGAAATCACTAGAGCTGTGATGGGCACATAGTCACC

GCAGCGGTGGAGAACTGACCATCTGTCCCTTGTGTTGTTAGGCCTCATCTCTGCATGG  
TCCTCATTGGCTCTGAGTTCTAG

>1434

CTAGAGCTGTGATGGGCACATAGTCACCGCAGCGGTGGAGAACTGACCATCTGTCCCT  
TGTGTTGTTTAGGCCTCATCTCTGCATGGTCCCTCATTGGCTCTGAGTTCTAGTGTGTAGT  
GTCCACAGTGCCACCCTCCATG

>1435

GTGGAGAACTGACCATCTGTCCCTTGTGTTGTTTAGGCCTCATCTCTGCATGGTCCCTCA  
TTGGCTCTGAGTTCTAGTGTGTAGTGTCCACAGTGCCACCCTCCATGAGGGTTGTGTTG  
ACTGTGAGGTGGTGCAGAGAAT

>1436

AACTGACCATCTGTCCCTTGTGTTGTTTAGGCCTCATCTCTGCATGGTCCCTCATTGGCTC  
TGAGTTCTAGTGTGTAGTGTCCACAGTGCCACCCTCCATGAGGGTTGTGTTGACTGTG  
AGGTGGTGCAGAGAATGTCCCT

>1437

CTTGTGTTGTTTAGGCCTCATCTCTGCATGGTCCCTCATTGGCTCTGAGTTCTAGTGTGTA  
GTGTCCACAGTGCCACCCTCCATGAGGGTTGTGTTGACTGTGAGGTGGTGCAGAGAAT  
GTCCCTGTCCTTGTGAGCATAT

>1438

TCATTGGCTCTGAGTTCTAGTGTGTAGTGTCCACAGTGCCACCCTCCATGAGGGTTGTG  
TTGACTGTGAGGTGGTGCAGAGAATGTCCCTGTCCTTGTGAGCATATGACAGCAAGAC  
ACTGGCCCTGGAATCCTCCGTGT

>1439

CTGAGTTCTAGTGTGTAGTGTCCACAGTGCCACCCTCCATGAGGGTTGTGTTGACTGTG  
AGGTGGTGCAGAGAATGTCCCTGTCCTTGTGAGCATATGACAGCAAGACACTGGCCCT  
GGAATCCTCCGTGTCACATGTGG

>1440

CACAGTGCCACCCTCCATGAGGGTTGTGTTGACTGTGAGGTGGTGCAGAGAATGTCCC  
TGCTCTTGTGAGCATATGACAGCAAGACACTGGCCCTGGAATCCTCCGTGTCACATGTG  
GGCTGCTGACAGGAAGAATGTGC

>1441

GTCCTTGTGAGCATATGACAGCAAGACACTGGCCCTGGAATCCTCCGTGTCACATGTG  
GGCTGCTGACAGGAAGAATGTGCTTTTGTGTTGTTGTTGTTGTTGAGGCAGAGTCTTA  
CTCTGTCGCCAGGCTGCAGTGC

>1442

TTGTGAGCATATGACAGCAAGACACTGGCCCTGGAATCCTCCGTGTCACATGTGGGCT  
GCTGACAGGAAGAATGTGCTTTTGTGTTGTTGTTGTTGTTGAGGCAGAGTCTTACTCT  
GTCGCCAGGCTGCAGTGCAGTGC

>1443

GGAATCCTCCGTGTCACATGTGGGCTGCTGACAGGAAGAATGTGCTTTTGTGTTGTTG  
TTGTTGTTGAGGCAGAGTCTTACTCTGTCGCCAGGCTGCAGTGCAGTGGCATGATCTT  
GGCTCACTGCAACCTCTACTTC

>1444

TCCTCCGTGTCACATGTGGGCTGCTGACAGGAAGAATGTGCTTTTGTGTTGTTGTTGTTG  
TGTGAGGCAGAGTCTTACTCTGTCGCCAGGCTGCAGTGCAGTGGCATGATCTTGGC  
TCACTGCAACCTCTACTTCCCGG



>1445

CTGCTGACAGGAAGAATGTGCTTTTGTGTTGTTGTTGTTGTTGAGGCAGAGTCTTACT  
CTGTGCGCCAGGCTGCAGTGCAGTGGCATGATCTTGGCTCACTGCAACCTCTACTTCCC  
GGGTTCAAGTGATTCTCCTGCC

>1446

CTCTGTGCGCCAGGCTGCAGTGCAGTGGCATGATCTTGGCTCACTGCAACCTCTACTTC  
CCGGGTTCAAGTGATTCTCCTGCCTCAGCCTCCTGAGCAGCTGGGACTACAGATGTGT  
ACCACCATGCCCGACTAATTTTT

>1447

CAGTGCAGTGGCATGATCTTGGCTCACTGCAACCTCTACTTCCCGGGTTCAAGTGATT  
TCCTGCCTCAGCCTCCTGAGCAGCTGGGACTACAGATGTGTACCACCATGCCCGACTAA  
TTTTTGTATTTTTAGTAGAGAT

>1448

ATGATCTTGGCTCACTGCAACCTCTACTTCCCGGGTTCAAGTGATTCTCCTGCCTCAGC  
CTCCTGAGCAGCTGGGACTACAGATGTGTACCACCATGCCCGACTAATTTTTGTATTTTT  
AGTAGAGATGGGGTTTCACCA

>1449

CACTGCAACCTCTACTTCCCGGGTTCAAGTGATTCTCCTGCCTCAGCCTCCTGAGCAGC  
TGGGACTACAGATGTGTACCACCATGCCCGACTAATTTTTGTATTTTTAGTAGAGATGGG  
GTTTCACCATGTTGGTCAGGC

>1450

GCCTCAGCCTCCTGAGCAGCTGGGACTACAGATGTGTACCACCATGCCCGACTAATTTTT  
TGATTTTTAGTAGAGATGGGGTTTCACCATGTTGGTCAGGCTGGCCTGGAACCTCTGG  
CCTTAAGTGATCCACCTGTCTC

>1451

AGATGTGTACCACCATGCCCGACTAATTTTTGTATTTTTAGTAGAGATGGGGTTTCACCA  
TGTTGGTCAGGCTGGCCTGGAACCTCCTGGCCTTAAGTGATCCACCTGTCTCGGCCTCCC  
ATAGTGCTGGGATTATAGGTG

>1452

TTTTTGTATTTTTAGTAGAGATGGGGTTTCACCATGTTGGTCAGGCTGGCCTGGAACCTC  
CTGGCCTTAAGTGATCCACCTGTCTCGGCCTCCCATAGTGCTGGGATTATAGGTGTGTG  
CCACCCTGCTGGGCCGAGAATG

>1453

TTCACCATGTTGGTCAGGCTGGCCTGGAACCTCCTGGCCTTAAGTGATCCACCTGTCTCG  
GCCTCCCATAGTGCTGGGATTATAGGTGTGTGCCACCCTGCTGGGCCGAGAATGTGCTT  
TTGACTGAGGGTGGAAAGTCAG

>1454

CAGGCTGGCCTGGAACCTCCTGGCCTTAAGTGATCCACCTGTCTCGGCCTCCCATAGTGC  
TGGGATTATAGGTGTGTGCCACCCTGCTGGGCCGAGAATGTGCTTTTACTGAGGGTG  
GAAAGTCAGCAGCTGCAGCCCAA

>1455

TAAGTGATCCACCTGTCTCGGCCTCCCATAGTGCTGGGATTATAGGTGTGTGCCACCCT  
GCTGGGCCGAGAATGTGCTTTTACTGAGGGTGGAAAGTCAGCAGCTGCAGCCCAAAG  
AAGTTAGAGCCAGGGGCAGTGCCT

>1456

CGGCCTCCCATAGTGCTGGGATTATAGGTGTGTGCCACCCTGCTGGGCCGAGAATGTGC

TTTTGACTGAGGGTGGAAAAGTCAGCAGCTGCAGCCCAAGAAGTTAGAGCCAGGGGCA  
GTGCCTTTGATGGGAAGCTTGGGG

>1457

ATAGTGCTGGGATTATAGGTGTGTGCCACCCTGCTGGGCCGAGAATGTGCTTTTACTG  
AGGGTGGAAAAGTCAGCAGCTGCAGCCCAAGAAGTTAGAGCCAGGGGCAGTGCCTTTG  
ATGGGAAGCTTGGGGGTCTAAAGA

>1458

TGTGTGCCACCCTGCTGGGCCGAGAATGTGCTTTTACTGAGGGTGGAAAAGTCAGCA  
GCTGCAGCCCAAGAAGTTAGAGCCAGGGGCAGTGCCTTTGATGGGAAGCTTGGGGGT  
CTAAAGAAATCAGAAAGGGGAGAAAA

>1459

GACTGAGGGTGGAAAAGTCAGCAGCTGCAGCCCAAGAAGTTAGAGCCAGGGGCAGTG  
CCTTTGATGGGAAGCTTGGGGGTCTAAAGAAATCAGAAAGGGGAGAAAATAATCCTGC  
GTGTGCTCAGCCCTCACTCAGATCAA

>1460

GTCAGCAGCTGCAGCCCAAGAAGTTAGAGCCAGGGGCAGTGCCTTTGATGGGAAGCT  
TGGGGGTCTAAAGAAATCAGAAAGGGGAGAAAATAATCCTGCGTGTGCTCAGCCCTC  
ACTCAGATCAACAGCCCCTCGGGTCC

>1461

TGCCTTTGATGGGAAGCTTGGGGGTCTAAAGAAATCAGAAAGGGGAGAAAATAATCCT  
GCGTGTGCTCAGCCCTCACTCAGATCAACAGCCCCTCGGGTCCCAGCTAGATGTACTTT  
GTAGAAGGCTTTTTTTCTCCCC

>1462

GGAAGCTTGGGGGTCTAAAGAAATCAGAAAGGGGAGAAAATAATCCTGCGTGTGCTC  
AGCCCTCACTCAGATCAACAGCCCCTCGGGTCCCAGCTAGATGTACTTTGTAGAAGGC  
TTTTTTTCTCCCCCTCACCTCAA

>1463

TCAGAAAGGGGAGAAAATAATCCTGCGTGTGCTCAGCCCTCACTCAGATCAACAGCCC  
CTCGGGTCCCAGCTAGATGTACTTTGTAGAAGGCTTTTTTTCTCCCCCTCACCTCAA  
ACTCCAGGATTAATGTGCTATTC

>1464

TAATCCTGCGTGTGCTCAGCCCTCACTCAGATCAACAGCCCCTCGGGTCCCAGCTAGAT  
GTACTTTGTAGAAGGCTTTTTTTCTCCCCCTCACCTCAAACTCCAGGATTAATGTGCT  
ATTCCCTTTTTTCTACTGTTCT

>1465

TCCTGCGTGTGCTCAGCCCTCACTCAGATCAACAGCCCCTCGGGTCCCAGCTAGATGT  
ACTTTGTAGAAGGCTTTTTTTCTCCCCCTCACCTCAAACTCCAGGATTAATGTGCTAT  
TCCCTTTTTTCTACTGTTCTCT

>1466

GCCCCTCGGGTCCCAGCTAGATGTACTTTGTAGAAGGCTTTTTTTCTCCCCCTCACCT  
CAAACTCCAGGATTAATGTGCTATTCCCTTTTTTCTACTGTTCTCTGTCTCCCCCAAC  
CCATCAGCAGTCTGAGAAATG

>1467

CCTCAAACTCCAGGATTAATGTGCTATTCCCTTTTTTCTACTGTTCTCTGTCTCCCCC  
AACCCATCAGCAGTCTGAGAAATGCTATGGTGAAAAAACAACAGCCCTATAA  
CCAGTACAAACAAAAAGCCAAG

>1468

CAAACTCCAGGATTAATGTGCTATTCCTTTTTCTACTGTTCTGTCTCCCCCAAC  
CCATCAGCAGTCTGAGAAATGCTATGGTGGAAAAAAAAAACAACAGCCCTATAACCA  
GTACAAACAAAAAGCCAAGACA

>1469

ACTGTTCTGTCTCCCCCAACCCATCAGCAGTCTGAGAAATGCTATGGTGGAAAAA  
AAAAACAACAGCCCTATAACCAGTACAAACAAAAAGCCAAGACAAAAAAAAAAAA  
AAAAAAATCAGAAGGGGAGATTTTG

>1470

CTCCCCCAACCCATCAGCAGTCTGAGAAATGCTATGGTGGAAAAAAAAAACAACA  
GCCCTATAACCAGTACAAACAAAAAGCCAAGACAAAAAAAAAAAAAAAAAAAAATCA  
GAAGGGGAGATTTTGAGGCCAGGAAGC

>1471

CAGTCTGAGAAATGCTATGGTGGAAAAAAAAAACAACAGCCCTATAACCAGTACAA  
ACAAAAAGCCAAGACAAAAAAAAAAAAAAAAAAAAATCAGAAGGGGAGATTTTGAGG  
CCAGGAAGCCATGGCATTCACTGGAAA

>1472

AAAAAAACAACAGCCCTATAACCAGTACAAACAAAAAGCCAAGACAAAAAAAAAAAA  
AAAAAAATCAGAAGGGGAGATTTTGAGGCCAGGAAGCCATGGCATTCACTGGAA  
ATATATCAGTGATAAAATAACAGGCTA

>1473

AAAAACAACAGCCCTATAACCAGTACAAACAAAAAGCCAAGACAAAAAAAAAAAA  
AAAAAAATCAGAAGGGGAGATTTTGAGGCCAGGAAGCCATGGCATTCACTGGAAATAT  
ATCAGTGATAAAATAACAGGCTACAG

>1474

CTATAACCAGTACAAACAAAAAGCCAAGACAAAAAAAAAAAAAAAAAAAAATCAGAA  
GGGGAGATTTTGAGGCCAGGAAGCCATGGCATTCACTGGAAATATATCAGTGATAAAAT  
AACAGGCTACAGGGTTTATTTTATT

>1475

AAAAAAAAAAAAATCAGAAGGGGAGATTTTGAGGCCAGGAAGCCATGGCATTCACT  
GGAAATATATCAGTGATAAAATAACAGGCTACAGGGTTTATTTTATTTTATTTTAAAGTCA  
ATAGGCCTGAGTGTTGGTAAAG

>1476

TCAGAAGGGGAGATTTTGAGGCCAGGAAGCCATGGCATTCACTGGAAATATATCAGTG  
ATAAAATAACAGGCTACAGGGTTTATTTTATTTTATTTTAAAGTCAATAGGCCTGAGTGT  
TGGTAAAGACTAGATACCCAGC

>1477

GGGAGATTTTGAGGCCAGGAAGCCATGGCATTCACTGGAAATATATCAGTGATAAAATA  
ACAGGCTACAGGGTTTATTTTATTTTATTTTAAAGTCAATAGGCCTGAGTGTTGGTAAAG  
ACTAGATACCCAGCAATCCTT

>1478

ATGGCATTCACTGGAAATATATCAGTGATAAAATAACAGGCTACAGGGTTTATTTTATTT  
TATTTTAAAGTCAATAGGCCTGAGTGTTGGTAAAGACTAGATACCCAGCAATCCTTCTT  
GCATTTCTTCTGGGGTCGGG

>1479

AAATATATCAGTGATAAAATAACAGGCTACAGGGTTTATTTTATTTTATTTTAAAGTCAAT

AGGCCTGAGTGTGGTAAAGACTAGATACCCAGCAATCCTTCTTGCATTCTTCTTGGG  
GTCGGGGGGCAGAAGGGAAT

>1480

TGATAAAATAACAGGCTACAGGGTTTATTTATTTATTTTAAAGTCAATAGGCCTGAGT  
GTTGGTAAAGACTAGATACCCAGCAATCCTTCTTGCATTCTTCTTGGGGTTCGGGGGC  
AGAAGGGAATGGAGAGGAAAT

>1481

AAATAACAGGCTACAGGGTTTATTTATTTATTTTAAAGTCAATAGGCCTGAGTGTGG  
TAAAGACTAGATACCCAGCAATCCTTCTTGCATTCTTCTTGGGGTTCGGGGGCAGAAG  
GGAATGGAGAGGAAATGAAGG

>1482

GGCCTGAGTGTGGTAAAGACTAGATACCCAGCAATCCTTCTTGCATTCTTCTTGGGG  
TCGGGGGGCAGAAGGGAATGGAGAGGAAATGAAGGCGGATTGCTGGTAAGTGAGGC  
AGGAAGGCAGGGAGTTTATTATGGA

>1483

CTGAGTGTGGTAAAGACTAGATACCCAGCAATCCTTCTTGCATTCTTCTTGGGGTCG  
GGGGGCAGAAGGGAATGGAGAGGAAATGAAGGCGGATTGCTGGTAAGTGAGGCAGG  
AAGGCAGGGAGTTTATTATGGAATG

>1484

GGTAAAGACTAGATACCCAGCAATCCTTCTTGCATTCTTCTTGGGGTTCGGGGGCAGA  
AGGGAATGGAGAGGAAATGAAGGCGGATTGCTGGTAAGTGAGGCAGGAAGGCAGGG  
AGTTTATTATGGAATGTCATCGGTA

>1485

GATACCCAGCAATCCTTCTTGCATTCTTCTTGGGGTTCGGGGGCAGAAGGGAATGGA  
GAGGAAATGAAGGCGGATTGCTGGTAAGTGAGGCAGGAAGGCAGGGAGTTTATTATG  
GAATGTCATCGGTAAGTTTCCCCAT

>1486

TCTTGGGGTTCGGGGGCAGAAGGGAATGGAGAGGAAATGAAGGCGGATTGCTGGTAA  
GTGAGGCAGGAAGGCAGGGAGTTTATTATGGAATGTCATCGGTAAGTTTCCCCATGATT  
TGATCCCAAGCTGGTGTGGAGTGA

>1487

TCGGGGGGCAGAAGGGAATGGAGAGGAAATGAAGGCGGATTGCTGGTAAGTGAGGC  
AGGAAGGCAGGGAGTTTATTATGGAATGTCATCGGTAAGTTTCCCCATGATTGATCCC  
AAGCTGGTGTGGAGTGAAGGGTAAG

>1488

GAAATGAAGGCGGATTGCTGGTAAGTGAGGCAGGAAGGCAGGGAGTTTATTATGGAAT  
GTCATCGGTAAGTTTCCCCATGATTGATCCCAAGCTGGTGTGGAGTGAAGGGTAAGCT  
GTTGGCTCAACAGATAGTGAGAA

>1489

AGTGAGGCAGGAAGGCAGGGAGTTTATTATGGAATGTCATCGGTAAGTTTCCCCATGAT  
TTGATCCCAAGCTGGTGTGGAGTGAAGGGTAAGCTGTTGGCTCAACAGATAGTGAGAA  
TCAAACCTAGTGGAGTTGTAGAT

>1490

AAGGCAGGGAGTTTATTATGGAATGTCATCGGTAAGTTTCCCCATGATTGATCCCAAG  
CTGGTGTGGAGTGAAGGGTAAGCTGTTGGCTCAACAGATAGTGAGAATCAAACCTAGT  
GGAGTTGTAGATCCTGTTTCCTG

>1491

AGGGAGTTTATTATGGAATGTCATCGGTAAGTTTCCCATGATTTGATCCCAAGCTGGTG  
TGGAGTGAAGGGTAAGCTGTTGGCTCAACAGATAGTGAGAATCAAACCTAGTGGAGTT  
GTAGATCCTGTTTCCTGCAGCG

>1492

TTTATTATGGAATGTCATCGGTAAGTTTCCCATGATTTGATCCCAAGCTGGTGTGGAGT  
GAAGGGTAAGCTGTTGGCTCAACAGATAGTGAGAATCAAACCTAGTGGAGTTGTAGAT  
CCTGTTTCCTGCAGCGGACAGC

>1493

CATCGGTAAGTTTCCCATGATTTGATCCCAAGCTGGTGTGGAGTGAAGGGTAAGCTGT  
TGGCTCAACAGATAGTGAGAATCAAACCTAGTGGAGTTGTAGATCCTGTTTCCTGCAGC  
GGACAGCAAGATGTACAAGCCG

>1494

ATTTGATCCCAAGCTGGTGTGGAGTGAAGGGTAAGCTGTTGGCTCAACAGATAGTGAG  
AATCAAACCTAGTGGAGTTGTAGATCCTGTTTCCTGCAGCGGACAGCAAGATGTACAA  
GCCGTCCACTGCAGGAATGACGTG

>1495

AGGGTAAGCTGTTGGCTCAACAGATAGTGAGAATCAAACCTAGTGGAGTTGTAGATCC  
TGTTTCCTGCAGCGGACAGCAAGATGTACAAGCCGTCCACTGCAGGAATGACGTGCTG  
TAAAAGGGATGCAGTGTCAAGTGT

>1496

GCTGTTGGCTCAACAGATAGTGAGAATCAAACCTAGTGGAGTTGTAGATCCTGTTTCCT  
GCAGCGGACAGCAAGATGTACAAGCCGTCCACTGCAGGAATGACGTGCTGTAAAAGG  
GATGCAGTGTCAAGTGTAGTCATG

>1497

TCAAACCTAGTGGAGTTGTAGATCCTGTTTCCTGCAGCGGACAGCAAGATGTACAAGC  
CGTCCACTGCAGGAATGACGTGCTGTAAAAGGGATGCAGTGTCAAGTGTAGTCATGGA  
TGGGTGGGAAGACCAGACAAAGGC

>1498

AGATCCTGTTTCCTGCAGCGGACAGCAAGATGTACAAGCCGTCCACTGCAGGAATGAC  
GTGCTGTAAAAGGGATGCAGTGTCAAGTGTAGTCATGGATGGGTGGGAAGACCAGAC  
AAAGGCATCCAATGGGACTGACTTA

>1499

TTTCCTGCAGCGGACAGCAAGATGTACAAGCCGTCCACTGCAGGAATGACGTGCTGTA  
AAAGGGATGCAGTGTCAAGTGTAGTCATGGATGGGTGGGAAGACCAGACAAAGGCAT  
CCAATGGGACTGACTTACCTAAACA

>1500

CAGCGGACAGCAAGATGTACAAGCCGTCCACTGCAGGAATGACGTGCTGTAAAAGGG  
ATGCAGTGTCAAGTGTAGTCATGGATGGGTGGGAAGACCAGACAAAGGCATCCAATGG  
GACTGACTTACCTAAACAAACCAGA

>1501

CCGTCCACTGCAGGAATGACGTGCTGTAAAAGGGATGCAGTGTCAAGTGTAGTCATGG  
ATGGGTGGGAAGACCAGACAAAGGCATCCAATGGGACTGACTTACCTAAACAAACCA  
GAAGGAAGTCAGAACAGTGGGAAGA

>1502

GTGTAGTCATGGATGGGTGGGAAGACCAGACAAAGGCATCCAATGGGACTGACTTACC

TAAACAAACCAGAAGGAAGTCAGAACAGTGGGAAGATCTGATAGATAAGCAGTATTCT  
GCAGGCAGATGAAGGAGCAAGCTT

>1503

TAGTCATGGATGGGTGGGAAGACCAGACAAAGGCATCCAATGGGACTGACTTACCTAA  
ACAAACCAGAAGGAAGTCAGAACAGTGGGAAGATCTGATAGATAAGCAGTATTCTGC  
AGGCAGATGAAGGAGCAAGCTTTGG

>1504

AAGGCATCCAATGGGACTGACTTACCTAAACAAACCAGAAGGAAGTCAGAACAGTGG  
GAAGATCTGATAGATAAGCAGTATTCTGCAGGCAGATGAAGGAGCAAGCTTTGGGCC  
CCAAATCTTCACCAGTGCATCCACA

>1505

ATCCAATGGGACTGACTTACCTAAACAAACCAGAAGGAAGTCAGAACAGTGGGAAGA  
TCTGATAGATAAGCAGTATTCTGCAGGCAGATGAAGGAGCAAGCTTTGGGCCCCCAA  
TCTTCACCAGTGCATCCACATTACA

>1506

CAATGGGACTGACTTACCTAAACAAACCAGAAGGAAGTCAGAACAGTGGGAAGATCT  
GATAGATAAGCAGTATTCTGCAGGCAGATGAAGGAGCAAGCTTTGGGCCCCCAAATCT  
TCACCAGTGCATCCACATTACAGAG

>1507

GACTTACCTAAACAAACCAGAAGGAAGTCAGAACAGTGGGAAGATCTGATAGATAAG  
CAGTATTCTGCAGGCAGATGAAGGAGCAAGCTTTGGGCCCCCAAATCTTCACCAGTGC  
ATCCACATTACAGAGGATAATGCCT

>1508

GATCTGATAGATAAGCAGTATTCTGCAGGCAGATGAAGGAGCAAGCTTTGGGCCCCCA  
AATCTTCACCAGTGCATCCACATTACAGAGGATAATGCCTGAGGGAGGGGAAGATCAT  
CTCAGGATTCTGGAACACTGGGCC

>1509

AGTATTCTGCAGGCAGATGAAGGAGCAAGCTTTGGGCCCCCAAATCTTCACCAGTGCA  
TCCACATTACAGAGGATAATGCCTGAGGGAGGGGAAGATCATCTCAGGATTCTGGAAC  
ACTGGGCCCTCCCTTTCTTATTCC

>1510

GATGAAGGAGCAAGCTTTGGGCCCCCAAATCTTCACCAGTGCATCCACATTACAGAGG  
ATAATGCCTGAGGGAGGGGAAGATCATCTCAGGATTCTGGAACACTGGGCCCTCCCTT  
TCTTATTCCAAAAGGCTGGAGCAG

>1511

AATGCCTGAGGGAGGGGAAGATCATCTCAGGATTCTGGAACACTGGGCCCTCCCTTTC  
TTATTCCAAAAGGCTGGAGCAGTTCTGCATGTAGGCTTCTCTGGAATGGTCTAGGAAC  
CAGCTCATCCAGGCCAGGAGCAC

>1512

GAGGGAGGGGAAGATCATCTCAGGATTCTGGAACACTGGGCCCTCCCTTTCTTATTCC  
AAAAGGCTGGAGCAGTTCTGCATGTAGGCTTCTCTGGAATGGTCTAGGAACCAGCTC  
ATCCAGGCCAGGAGCACCTGATCA

>1513

TGGGCCCTCCCTTTCTTATTCCAAAAGGCTGGAGCAGTTCTGCATGTAGGCTTCTCTGG  
AAATGGTCTAGGAACCAGCTCATCCAGGCCAGGAGCACCTGATCATTCTCAGAGTTAC  
GTACATATGCGATAAGATTGCAG

>1514

TCCCTTTCTTATTCCAAAAGGCTGGAGCAGTTCTGCATGTAGGCTTCTCTGGAAATGGT  
CTAGGAACCAGCTCATCCAGGCCAGGAGCACCTGATCATTCTCAGAGTTACGTACATAT  
GCGATAAGATTGCAGGGAACAG

>1515

AAGGCTGGAGCAGTTCTGCATGTAGGCTTCTCTGGAAATGGTCTAGGAACCAGCTCAT  
CCAGGCCAGGAGCACCTGATCATTCTCAGAGTTACGTACATATGCGATAAGATTGCAGG  
GAACAGTATAGTTCTATAGACTT

>1516

GGTCTAGGAACCAGCTCATCCAGGCCAGGAGCACCTGATCATTCTCAGAGTTACGTAC  
ATATGCGATAAGATTGCAGGGAACAGTATAGTTCTATAGACTTAAGTGTGAACATAGTC  
CTCATTTATAGTCCCTAGTCTCC

>1517

GAACCAGCTCATCCAGGCCAGGAGCACCTGATCATTCTCAGAGTTACGTACATATGCGA  
TAAGATTGCAGGGAACAGTATAGTTCTATAGACTTAAGTGTGAACATAGTCCTCATTTAT  
AGTCCCTAGTCTCCCATGGCT

>1518

GGAGCACCTGATCATTCTCAGAGTTACGTACATATGCGATAAGATTGCAGGGAACAGTA  
TAGTTCTATAGACTTAAGTGTGAACATAGTCCTCATTTATAGTCCCTAGTCTCCCATGGC  
TCACGCAGCTTGGTCTTTATG

>1519

CAGAGTTACGTACATATGCGATAAGATTGCAGGGAACAGTATAGTTCTATAGACTTAAG  
TGTGAACATAGTCCTCATTTATAGTCCCTAGTCTCCCATGGCTCACGCAGCTTGGTCTTT  
ATGTGTTTCTGAATTTAGTGC

>1520

ATATGCGATAAGATTGCAGGGAACAGTATAGTTCTATAGACTTAAGTGTGAACATAGTC  
CTCATTTATAGTCCCTAGTCTCCCATGGCTCACGCAGCTTGGTCTTTATGTGTTTCTGAA  
TTTAGTGCTGCAGAGGCACAA

>1521

ATAAGATTGCAGGGAACAGTATAGTTCTATAGACTTAAGTGTGAACATAGTCCTCATTTA  
TAGTCCCTAGTCTCCCATGGCTCACGCAGCTTGGTCTTTATGTGTTTCTGAATTTAGTGC  
TGCAGAGGCACAATGGGGTCT

>1522

TAGTCCTCATTTATAGTCCCTAGTCTCCCATGGCTCACGCAGCTTGGTCTTTATGTGTTT  
CTGAATTTAGTGTCTGCAGAGGCACAATGGGGTCTGGTTTCTGGATCTTATACAGACAAG  
CACTTAGGTCAGCTGCAGTGG

>1523

ATTTATAGTCCCTAGTCTCCCATGGCTCACGCAGCTTGGTCTTTATGTGTTTCTGAATTTA  
GTGCTGCAGAGGCACAATGGGGTCTGGTTTCTGGATCTTATACAGACAAGCACTTAGG  
TCAGCTGCAGTGGATGTCCTG

>1524

TGGTCTTTATGTGTTTCTGAATTTAGTGTCTGCAGAGGCACAATGGGGTCTGGTTTCTGG  
ATCTTATACAGACAAGCACTTAGGTCAGCTGCAGTGGATGTCCTGCACAGACACCGTC  
GCAACTCTTGCTGGTTCCTTTT

>1525

GTTTCTGAATTTAGTGTCTGCAGAGGCACAATGGGGTCTGGTTTCTGGATCTTATACAGA

CAAGCACTTAGGTCAGCTGCAGTGGATGTCCTGCACAGACACCGTCGCAACTCTTGCC  
TGGTTCCTTTTTGTTTTGGAGA

>1526

TGAATTTAGTGCTGCAGAGGCACAATGGGGTCTGGTTTCTGGATCTTATACAGACAAGC  
ACTTAGGTCAGCTGCAGTGGATGTCCTGCACAGACACCGTCGCAACTCTGCCTGGTT  
CCTTTTTGTTTTGGAGATGGAG

>1527

CAATGGGGTCTGGTTTCTGGATCTTATACAGACAAGCACTTAGGTCAGCTGCAGTGGAT  
GTCCTGCACAGACACCGTCGCAACTCTGCCTGGTTCTTTTTGTTTTGGAGATGGAG  
TCTCGCTCTGTCTCCAGGCTG

>1528

GGTCAGCTGCAGTGGATGTCCTGCACAGACACCGTCGCAACTCTGCCTGGTTCTTT  
TTGTTTTGGAGATGGAGTCTCGCTCTGTCTCCAGGCTGGAGTGCAGTGGCGCGATC  
TCAGCTCACTGCAAGCTCTGCCTC

>1529

CTGCAGTGGATGTCCTGCACAGACACCGTCGCAACTCTGCCTGGTTCTTTTTGTTTT  
TGGAGATGGAGTCTCGCTCTGTCTCCAGGCTGGAGTGCAGTGGCGCGATCTCAGCTC  
ACTGCAAGCTCTGCCTCCAGGT

>1530

ACAGACACCGTCGCAACTCTGCCTGGTTCTTTTTGTTTTGGAGATGGAGTCTCGCT  
CTGTCTCCAGGCTGGAGTGCAGTGGCGCGATCTCAGCTCACTGCAAGCTCTGCCTCC  
CAGGTTACGCTATTCTCCTGCC

>1531

GTTCTTTTTGTTTTGGAGATGGAGTCTCGCTCTGTCTCCAGGCTGGAGTGCAGTGG  
CGCGATCTCAGCTCACTGCAAGCTCTGCCTCCAGGTTACGCTATTCTCCTGCCTCAG  
CCTCCCAAGTAGTTGGGACTAC

>1532

TTTTTGGAGATGGAGTCTCGCTCTGTCTCCAGGCTGGAGTGCAGTGGCGCGATCTCA  
GCTCACTGCAAGCTCTGCCTCCAGGTTACGCTATTCTCCTGCCTCAGCCTCCCAAGT  
AGTTGGGACTACAGGCACCCGCC

>1533

AGTCTCGCTCTGTCTCCAGGCTGGAGTGCAGTGGCGCGATCTCAGCTCACTGCAAGC  
TCTGCCTCCAGGTTACGCTATTCTCCTGCCTCAGCCTCCCAAGTAGTTGGGACTACA  
GGCACCCGCCACCACGCCCGGCT

>1534

GAGTGCAGTGGCGCGATCTCAGCTCACTGCAAGCTCTGCCTCCAGGTTACGCTATT  
CTCCTGCCTCAGCCTCCCAAGTAGTTGGGACTACAGGCACCCGCCACCACGCCCGGCT  
AATTTTTGTATTTTAGTAGAGA

>1535

GGCGCGATCTCAGCTCACTGCAAGCTCTGCCTCCAGGTTACGCTATTCTCCTGCCTC  
AGCCTCCCAAGTAGTTGGGACTACAGGCACCCGCCACCACGCCCGGCTAATTTTTGTA  
TTTTTAGTAGAGACAGGGTTTC

>1536

GCGATCTCAGCTCACTGCAAGCTCTGCCTCCAGGTTACGCTATTCTCCTGCCTCAGC  
CTCCCAAGTAGTTGGGACTACAGGCACCCGCCACCACGCCCGGCTAATTTTTGTATTT  
TTAGTAGAGACAGGGTTTCACC



>1537

CACTGCAAGCTCTGCCTCCCAGGTTACGCTATTCTCCTGCCTCAGCCTCCCAAGTAGT  
TGGGACTACAGGCACCCGCCACCACGCCCGGCTAATTTTTGTATTTTAGTAGAGACA  
GGGTTTCACCGTGTAGCCAGT

>1538

CCTCAGCCTCCCAAGTAGTTGGGACTACAGGCACCCGCCACCACGCCCGGCTAATTTT  
TTGTATTTTAGTAGAGACAGGGTTTCACCGTGTAGCCAGTATGGTCTCGATCTCCTGA  
ACTCGTGATCCACCTGCCTCGG

>1539

CAGCCTCCCAAGTAGTTGGGACTACAGGCACCCGCCACCACGCCCGGCTAATTTTTTG  
TATTTTAGTAGAGACAGGGTTTCACCGTGTAGCCAGTATGGTCTCGATCTCCTGAAC  
TCGTGATCCACCTGCCTCGGCCT

>1540

GCCTCCCAAGTAGTTGGGACTACAGGCACCCGCCACCACGCCCGGCTAATTTTTGTAT  
TTTTAGTAGAGACAGGGTTTCACCGTGTAGCCAGTATGGTCTCGATCTCCTGAACTCG  
TGATCCACCTGCCTCGGCCTCC

>1541

CCCAAGTAGTTGGGACTACAGGCACCCGCCACCACGCCCGGCTAATTTTTGTATTTT  
AGTAGAGACAGGGTTTCACCGTGTAGCCAGTATGGTCTCGATCTCCTGAACTCGTGAT  
CCACCTGCCTCGGCCTCCAAA

>1542

TACAGGCACCCGCCACCACGCCCGGCTAATTTTTGTATTTTAGTAGAGACAGGGTTT  
CACCGTGTAGCCAGTATGGTCTCGATCTCCTGAACTCGTGATCCACCTGCCTCGGCCT  
CCCAAAGTGCTGGGATTACAGG

>1543

GTTTCACCGTGTAGCCAGTATGGTCTCGATCTCCTGAACTCGTGATCCACCTGCCTCG  
GCCTCCCAAAGTGCTGGGATTACAGGTGTGAGCCACCACGCCCGGCTATTGCCTGGT  
TCTTGAAGGGATTCTCAGGAACC

>1544

GCCAGTATGGTCTCGATCTCCTGAACTCGTGATCCACCTGCCTCGGCCTCCCAAAGTGC  
TGGGATTACAGGTGTGAGCCACCACGCCCGGCTATTGCCTGGTTCTTGAAGGGATTCT  
CAGGAACCACAGGGAATGTCTG

>1545

CTCGGCCTCCCAAAGTGCTGGGATTACAGGTGTGAGCCACCACGCCCGGCTATTGCC  
TGTTCTTGAAGGGATTCTCAGGAACCACAGGGAATGTCTGAGCCAGCTTTCTGGATC  
CGTGTGTACAGCCCTCCAGAGG

>1546

CAAAGTGCTGGGATTACAGGTGTGAGCCACCACGCCCGGCTATTGCCTGGTTCTTGA  
AGGGATTCTCAGGAACCACAGGGAATGTCTGAGCCAGCTTTCTGGATCCGTGTGTACA  
GCCCTCCAGAGGCTTTGTGGAG

>1547

GTGAGCCACCACGCCCGGCTATTGCCTGGTTCTTGAAGGGATTCTCAGGAACCACAG  
GGAATGTCTGAGCCAGCTTTCTGGATCCGTGTGTACAGCCCTCCAGAGGCTTTGTG  
GAGCCAGCTGTACGGTGCATGAGC

>1548

CTGGTTCTTGAAGGGATTCTCAGGAACCACAGGGAATGTCTGAGCCAGCTTTCTGGAT

CCGTGTGTACAGCCCTTCCCAGAGGCTTTGTGGAGCCAGCTGTACGGTGCATGAGCTT  
TGTGGCTAAGATATCAGAGTTCTG

>1549

AAGGGATTCTCAGGAACCACAGGGAATGTCTGAGCCAGCTTTCTGGATCCGTGTGTAC  
AGCCCTTCCCAGAGGCTTTGTGGAGCCAGCTGTACGGTGCATGAGCTTTGTGGCTAAG  
ATATCAGAGTTCTGCCTGGCCCTT

>1550

GAACCACAGGGAATGTCTGAGCCAGCTTTCTGGATCCGTGTGTACAGCCCTTCCCAGA  
GGCTTTGTGGAGCCAGCTGTACGGTGCATGAGCTTTGTGGCTAAGATATCAGAGTTCTG  
CCTGGCCCTTGGCCTTGGTCTCT

>1551

ATCCGTGTGTACAGCCCTTCCCAGAGGCTTTGTGGAGCCAGCTGTACGGTGCATGAGC  
TTTGTGGCTAAGATATCAGAGTTCTGCCTGGCCCTTGGCCTTGGTCTCTCTCAGATGGT  
CAGCTGCTCTGTTTTTAGTGGTT

>1552

TGTACAGCCCTTCCCAGAGGCTTTGTGGAGCCAGCTGTACGGTGCATGAGCTTTGTGG  
CTAAGATATCAGAGTTCTGCCTGGCCCTTGGCCTTGGTCTCTCTCAGATGGTCAGCTGC  
TCTGTTTTTAGTGGTTGATCATG

>1553

TGTACGGTGCATGAGCTTTGTGGCTAAGATATCAGAGTTCTGCCTGGCCCTTGGCCTTG  
GTCTCTCTCAGATGGTCAGCTGCTCTGTTTTTAGTGGTTGATCATGTAGAAGGCCAACA  
GGTGTGACCTTGGTTTAGGCT

>1554

CTAAGATATCAGAGTTCTGCCTGGCCCTTGGCCTTGGTCTCTCTCAGATGGTCAGCTGC  
TCTGTTTTTAGTGGTTGATCATGTAGAAGGCCAACAGGTGTTGACCTTGGTTTAGGCTA  
CTTTTGGGATTTTTGAGGTTTC

>1555

TCTGCCTGGCCCTTGGCCTTGGTCTCTCTCAGATGGTCAGCTGCTCTGTTTTTAGTGGT  
TGATCATGTAGAAGGCCAACAGGTGTTGACCTTGGTTTAGGCTACTTTTGGGATTTTTG  
AGGTTTCCTGAGACTCTTGGTT

>1556

CAGATGGTCAGCTGCTCTGTTTTTAGTGGTTGATCATGTAGAAGGCCAACAGGTGTTGA  
CCTTGGTTTAGGCTACTTTTGGGATTTTTGAGGTTTCCTGAGACTCTTGGTTTTCTTCA  
TCATCCCGTCCAGAACCTCTG

>1557

TTTAGTGGTTGATCATGTAGAAGGCCAACAGGTGTTGACCTTGGTTTAGGCTACTTTTG  
GGATTTTTGAGGTTTCCTGAGACTCTTGGTTTTCTTTCATCATCCCGTCCAGAACCTCTG  
ATGTCAAATAAATTCTGTTT

>1558

GATCATGTAGAAGGCCAACAGGTGTTGACCTTGGTTTAGGCTACTTTTGGGATTTTTGA  
GGTTTCCTGAGACTCTTGGTTTTCTTTCATCATCCCGTCCAGAACCTCTGATGTCAAATA  
AAATTCTGTTTGGAAAAGGGT

>1559

TGGTTTAGGCTACTTTTGGGATTTTTGAGGTTTCCTGAGACTCTTGGTTTTCTTTCATCA  
TCCCGTCCAGAACCTCTGATGTCAAATAAATTCTGTTTGGAAAAGGGTATGCTGTAGA  
ATAATGATAGCCACAGCAATG

>1560

GAGACTCTTGGTTTTCTTCATCATCCCGTCCAGAACCTCTGATGTCAAACCTAAATTCT  
GTTTGGAAAAGGGTATGCTGTAGAATAATGATAGCCACAGCAATGATATTAATAACCT  
TTTATCGGTTGCAGCATTTC

>1561

TTTCTTCATCATCCCGTCCAGAACCTCTGATGTCAAACCTAAATTCTGTTTGGAAAAGG  
GTATGCTGTAGAATAATGATAGCCACAGCAATGATATTAATAACCTTTTATCGGTTGCA  
GCATTTTCTTCTTGCAAAG

>1562

TCCAGAACCTCTGATGTCAAACCTAAATTCTGTTTGGAAAAGGGTATGCTGTAGAATAAT  
GATAGCCACAGCAATGATATTAATAACCTTTTATCGGTTGCAGCATTTCCTTTGCA  
AAGCACCTCTAATGACTTTA

>1563

GGAAAAGGGTATGCTGTAGAATAATGATAGCCACAGCAATGATATTAATAACCTTTTA  
TCGGTTGCAGCATTTCCTTTGCAAAGCACCTCTAATGACTTTATCTCTTGCCTC  
ACAGCCTTCCTTGAGTGGGT

>1564

AATAATGATAGCCACAGCAATGATATTAATAACCTTTTATCGGTTGCAGCATTTCCTC  
TTTGCAAAGCACCTCTAATGACTTTATCTCTTGCCTCACAGCCTTCCTTGAGTGGGT  
ACAGGTCCATAATCCATA

>1565

CTTTTATCGGTTGCAGCATTTCCTTTGCAAAGCACCTCTAATGACTTTATCTCTTGG  
CCCTCACAGCCTTCCTTGAGTGGGTACAGGTCCATAATCCCATATCTGTGATAATGAAG  
TCTGAAAAGCTCTGAAAAC

>1566

TGCAGCATTTCCTTTGCAAAGCACCTCTAATGACTTTATCTCTTGCCTCACAGC  
CTTCCTTGAGTGGGTACAGGTCCATAATCCCATATCTGTGATAATGAAGTCTGAAAAGC  
TCTGAAAACCTGAAAAGTTTGC

>1567

TATCTCTTGCCTCACAGCCTTCCTTGAGTGGGTACAGGTCCATAATCCCATATCTGT  
GATAATGAAGTCTGAAAAGCTCTGAAAACCTGAAAAGTTTGCAGTAAACTCATTTAGTG  
GCAAACCTGATCTGAACTGAT

>1568

TGCCCTCACAGCCTTCCTTGAGTGGGTACAGGTCCATAATCCCATATCTGTGATAATGA  
AGTCTGAAAAGCTCTGAAAACCTGAAAAGTTTGCAGTAAACTCATTTAGTGGCAAAC  
TGATCTGAACTGATGTGAGGCTA

>1569

GGTACAGGTCCATAATCCCATATCTGTGATAATGAAGTCTGAAAAGCTCTGAAAACCTAA  
AAAGTTTGCAGTAAACTCATTTAGTGGCAAACCTGATCTGAACTGATGTGAGGCTATA  
TTTATCCTGCTTAGTTTGAATA

>1570

AATCCCATATCTGTGATAATGAAGTCTGAAAAGCTCTGAAAACCTGAAAAGTTTGCAGTA  
AACTCATTTAGTGGCAAACCTGATCTGAACTGATGTGAGGCTATATTTATCCTGCTTAG  
TTTGAATATTCATATGTTTTG

>1571

AAAGCTCTGAAAACCTGAAAAGTTTGCAGTAAACTCATTTAGTGGCAAACCTGATCTG

AACTGATGTGAGGCTATATTTATCCTGCTTAGTTTGAATATTCATATGTTTTGCTGCAAAA  
ATATTAATGTGTTTGATTACA

>1572

GTTTGCAGTAAACTCATTTAGTGGCAAAACCTGATCTGAACTGATGTGAGGCTATATTTA  
TCCTGCTTAGTTTGAATATTCATATGTTTTGCTGCAAAAATATTAATGTGTTTGATTACAG  
AGTGCTGCCCTAGACTCTG

>1573

CTATATTTATCCTGCTTAGTTTGAATATTCATATGTTTTGCTGCAAAAATATTAATGTGTTT  
GATTACAGAGTGCTGCCCTAGACTCTGCTGGGGCTGTAAACACGATAGGTGTCAGAG  
TACCTTTCTTTTTTTTTTTTT

>1574

ATATTTATCCTGCTTAGTTTGAATATTCATATGTTTTGCTGCAAAAATATTAATGTGTTTGA  
TTACAGAGTGCTGCCCTAGACTCTGCTGGGGCTGTAAACACGATAGGTGTCAGAGTA  
CCTTTCTTTTTTTTTTTTT

>1575

TGCAAAAATATTAATGTGTTTGATTACAGAGTGCTGCCCTAGACTCTGCTGGGGCTGTT  
AAACACGATAGGTGTCAGAGTACCTTTCTTTTTTTTTTTTTTTTTTTTTTTTTTTTGGAGACGGA  
GTCTCGCTCTGTCGCCAGGT

>1576

ATATTAATGTGTTTGATTACAGAGTGCTGCCCTAGACTCTGCTGGGGCTGTAAACACG  
ATAGGTGTCAGAGTACCTTTCTTTTTTTTTTTTTTTTTTTTTTTTTTTTGGAGACGGAGTCTCGC  
TCTGTCGCCAGGTCTGGACTG

>1577

TCTGCTGGGGCTGTAAACACGATAGGTGTCAGAGTACCTTTCTTTTTTTTTTTTTTTTTTT  
TTTTTTTGGAGACGGAGTCTCGCTCTGTCGCCAGGTCTGGACTGCGGACTGCAGTGGCG  
CAATCTCGGCTCACTGCAAGCT

>1578

GGGGCTGTAAACACGATAGGTGTCAGAGTACCTTTCTTTTTTTTTTTTTTTTTTTTTTTTT  
GAGACGGAGTCTCGCTCTGTCGCCAGGTCTGGACTGCGGACTGCAGTGGCGCAATCT  
CGGCTCACTGCAAGCTCCGCTT

>1579

AGGTGTCAGAGTACCTTTCTTTTTTTTTTTTTTTTTTTTTTTTTTTTGGAGACGGAGTCTCGCTC  
TGTCGCCAGGTCTGGACTGCGGACTGCAGTGGCGCAATCTCGGCTCACTGCAAGCTCC  
GCTTCCCGGTTTCATGCCATT

>1580

AGACGGAGTCTCGCTCTGTCGCCAGGTCTGGACTGCGGACTGCAGTGGCGCAATCTC  
GGCTCACTGCAAGCTCCGCTTCCCGGGTTTCATGCCATTCTCCTGCCTCAGCCTCCCGAG  
TAGCTGGGACTACAGGCGCCCGCC

>1581

GACTGCAGTGGCGCAATCTCGGCTCACTGCAAGCTCCGCTTCCCGGGTTTCATGCCATT  
CTCCTGCCTCAGCCTCCCGAGTAGCTGGGACTACAGGCGCCCGCCACCGCGCCCGGCT  
AATTTTTGTATTTTAGTAGAGA

>1582

GGCGCAATCTCGGCTCACTGCAAGCTCCGCTTCCCGGGTTTCATGCCATTCTCCTGCCTC  
AGCCTCCGAGTAGCTGGGACTACAGGCGCCCGCCACCGCGCCCGGCTAATTTTTTGT  
ATTTTTAGTAGAGACGGGTTTC

>1583

GCAATCTCGGCTCACTGCAAGCTCCGCTTCCCGGGTTCATGCCATTCTCCTGCCTCAGC  
CTCCCGAGTAGCTGGGACTACAGGCGCCCGCCACCGCGCCCGGCTAATTTTTGTATTT  
TTAGTAGAGACGGGGTTTCACC

>1584

CACTGCAAGCTCCGCTTCCCGGGTTCATGCCATTCTCCTGCCTCAGCCTCCCGAGTAGC  
TGGGACTACAGGCGCCCGCCACCGCGCCCGGCTAATTTTTGTATTTTTAGTAGAGACG  
GGGTTTCACCTTGTTAGCCAGG

>1585

CAGCCTCCCGAGTAGCTGGGACTACAGGCGCCCGCCACCGCGCCCGGCTAATTTTTG  
TATTTTTAGTAGAGACGGGGTTTCACCTTGTTAGCCAGGATGGTCTCGATCTCCTGACC  
TCATGATCCACCCGCCTCGGCCT

>1586

GCCTCCCGAGTAGCTGGGACTACAGGCGCCCGCCACCGCGCCCGGCTAATTTTTGTAT  
TTTTAGTAGAGACGGGGTTTCACCTTGTTAGCCAGGATGGTCTCGATCTCCTGACCTCA  
TGATCCACCCGCCTCGGCCTCC

>1587

TACAGGCGCCCGCCACCGCGCCCGGCTAATTTTTGTATTTTTAGTAGAGACGGGGTTT  
CACCTTGTTAGCCAGGATGGTCTCGATCTCCTGACCTCATGATCCACCCGCCTCGGCCT  
CCCAAAGTGCTGGGATTACAGG

>1588

GTTTCACCTTGTTAGCCAGGATGGTCTCGATCTCCTGACCTCATGATCCACCCGCCTCG  
GCCTCCCAAAGTGCTGGGATTACAGGCGTGAGCACCGCGCCCGGCCAGAGTACCTTT  
CTAAAGTCTGAACAGTTTTGGTC

>1589

GCCAGGATGGTCTCGATCTCCTGACCTCATGATCCACCCGCCTCGGCCTCCCAAAGTGC  
TGGGATTACAGGCGTGAGCACCGCGCCCGGCCAGAGTACCTTTCTAAAGTCTGAACA  
GTTTTGGTCGTTGAAGCACCTGA

>1590

CCTCATGATCCACCCGCCTCGGCCTCCCAAAGTGCTGGGATTACAGGCGTGAGCACCG  
CGCCCGGCCAGAGTACCTTTCTAAAGTCTGAACAGTTTTGGTCGTTGAAGCACCTGA  
AGGTTTTGGATAAGGGATTATGAA

>1591

GCCTCGGCCTCCCAAAGTGCTGGGATTACAGGCGTGAGCACCGCGCCCGGCCAGAG  
TACCTTTCTAAAGTCTGAACAGTTTTGGTCGTTGAAGCACCTGAAGTTTTGGATAAGG  
GATTATGAACGATTATCATTCTCT

>1592

TCCCAAAGTGCTGGGATTACAGGCGTGAGCACCGCGCCCGGCCAGAGTACCTTTCTA  
AAGTCTGAACAGTTTTGGTCGTTGAAGCACCTGAAGGTTTTGGATAAGGGATTATGAA  
CGATTATCATTCTCTATTGACAAA

>1593

ATTACAGGCGTGAGCACCGCGCCCGGCCAGAGTACCTTTCTAAAGTCTGAACAGTTT  
TGGTCGTTGAAGCACCTGAAGTTTTGGATAAGGGATTATGAACGATTATCATTCTCTAT  
TGACAAATGAGGAAAATGAGAT

>1594

GGTCGTTGAAGCACCTGAAGTTTTGGATAAGGGATTATGAACGATTATCATTCTCTATT

GACAAATGAGGAAAATGAGATTTGGAGCAAGTAAGTGAAGTACTTCCCATGGTCACACAGCT  
ATAAATGGGTAGAACCAGGCAC

>1595

AGCACCTGAAGGTTTTGGATAAGGGATTATGAACGATTATCATTCTCTATTGACAAATG  
AGGAAAATGAGATTTGGAGCAAGTAAGTGAAGTACTTCCCATGGTCACACAGCTATAAATGG  
GTAGAACCAGGCACTCAGCTTGC

>1596

GGATAAGGGATTATGAACGATTATCATTCTCTATTGACAAATGAGGAAAATGAGATTTG  
GAGCAAGTAAGTGAAGTACTTCCCATGGTCACACAGCTATAAATGGGTAGAACCAGGCACT  
AGCTTGCCTTCTAATTCACAGTC

>1597

TATCATTCTCTATTGACAAATGAGGAAAATGAGATTTGGAGCAAGTAAGTGAAGTACTTCCCA  
TGGTCACACAGCTATAAATGGGTAGAACCAGGCACTCAGCTTGCCTTCTAATTCACAGT  
CCTGGGCGCTCTGCACCAGGCC

>1598

GACAAATGAGGAAAATGAGATTTGGAGCAAGTAAGTGAAGTACTTCCCATGGTCACACAGCT  
ATAAATGGGTAGAACCAGGCACTCAGCTTGCCTTCTAATTCACAGTCCTGGGCGCTCTG  
CACCAGGCCATATAAGAACATGA

>1599

AGTGAAGTACTTCCCATGGTCACACAGCTATAAATGGGTAGAACCAGGCACTCAGCTTGCCT  
TCTAATTCACAGTCCTGGGCGCTCTGCACCAGGCCATATAAGAACATGAGCATTGCTCT  
TCTGGGTCAAATCCATCTGACCT

>1600

CAGCTATAAATGGGTAGAACCAGGCACTCAGCTTGCCTTCTAATTCACAGTCCTGGGCG  
CTCTGCACCAGGCCATATAAGAACATGAGCATTGCTCTTCTGGGTCAAATCCATCTGAC  
CTAGTCTTTGGTTGCCATCACC

>1601

TGGGTAGAACCAGGCACTCAGCTTGCCTTCTAATTCACAGTCCTGGGCGCTCTGCACC  
AGGCCATATAAGAACATGAGCATTGCTCTTCTGGGTCAAATCCATCTGACCTAGTCTTT  
GGTTGCCATCACCATGCCTAAGA

>1602

CTGGGCGCTCTGCACCAGGCCATATAAGAACATGAGCATTGCTCTTCTGGGTCAAATCC  
ATCTGACCTAGTCTTTGGTTGCCATCACCATGCCTAAGATACCACCATTGGAGGCTACA  
ACCATCTTCTTGACGTCATC

>1603

GAACATGAGCATTGCTCTTCTGGGTCAAATCCATCTGACCTAGTCTTTGGTTGCCATCA  
CCATGCCTAAGATACCACCATTGGAGGCTACAACCATCTTCTTGACGTCATCCTAAA  
GGTCAGGTGTAGCTTCTCTTAG

>1604

TCTTCTGGGTCAAATCCATCTGACCTAGTCTTTGGTTGCCATCACCATGCCTAAGATACC  
ACCATTGGAGGCTACAACCATCTTCTTGACGTCATCCTAAAGGTCAGGTGTAGCTTC  
TCTTAGTAGCTATTTATGGCT

>1605

GTTGCCATCACCATGCCTAAGATACCACCATTGGAGGCTACAACCATCTTCTTGACGT  
CAATCCTAAAGGTCAGGTGTAGCTTCTCTTAGTAGCTATTTATGGCTGCCTTGTCAATCA  
CAGATTTGCCAAAATCCTTTT

>1606

CATCACCATGCCTAAGATAACCACCATTGGAGGCTACAACCATCTTCCTTGACGTCAATC  
CTAAAGGTCAGGTGTAGCTTCTCTTAGTAGCTATTTATGGCTGCCTTGTCATTCACAGAT  
TTGCCAAAATCCTTTTTGAAT

>1607

CCACCATTGGAGGCTACAACCATCTTCCTTGACGTCAATCCTAAAGGTCAGGTGTAGCT  
TCTCTTAGTAGCTATTTATGGCTGCCTTGTCATTCACAGATTTGCCAAAATCCTTTTTGA  
ATCCATTTCCATTTCCAGGAA

>1608

TTGACGTCAATCCTAAAGGTCAGGTGTAGCTTCTCTTAGTAGCTATTTATGGCTGCCTTG  
TCATTCACAGATTTGCCAAAATCCTTTTTGAATCCATTTCCATTTCCAGGAAGTATCCTT  
TTTAGGGGTGATGAATGACA

>1609

TAGCTATTTATGGCTGCCTTGTCATTCACAGATTTGCCAAAATCCTTTTTGAATCCATTTCC  
CATTTCCAGGAAGTATCCTTTTTAGGGGTGATGAATGACAAGTTTATAATCTCCTGGGCT  
CCTGGAAATCTGGTCTTTT

>1610

TATTTATGGCTGCCTTGTCATTCACAGATTTGCCAAAATCCTTTTTGAATCCATTTCCATT  
TCCAGGAAGTATCCTTTTTAGGGGTGATGAATGACAAGTTTATAATCTCCTGGGCTCCT  
GGAAATCTGGTCTTTTGGAG

>1611

CCTTGTCAATCACAGATTTGCCAAAATCCTTTTTGAATCCATTTCCATTTCCAGGAAGTA  
TCCTTTTTAGGGGTGATGAATGACAAGTTTATAATCTCCTGGGCTCCTGGAAATCTGGT  
CTTTTGGAGAGAGGTTGTTGG

>1612

TATCCTTTTTAGGGGTGATGAATGACAAGTTTATAATCTCCTGGGCTCCTGGAAATCTGG  
TCTTTTGGAGAGAGGTTGTTGGTTGTGAAGATAGGAAGATGGCAGAAGGCTTTGTAGT  
GGTGAGGCCAGGTCTAGACCTA

>1613

TCCTTTTTAGGGGTGATGAATGACAAGTTTATAATCTCCTGGGCTCCTGGAAATCTGGT  
CTTTTGGAGAGAGGTTGTTGGTTGTGAAGATAGGAAGATGGCAGAAGGCTTTGTAGTG  
GTGAGGCCAGGTCTAGACCTAGC

>1614

GTTTATAATCTCCTGGGCTCCTGGAAATCTGGTCTTTTGGAGAGAGGTTGTTGGTTGTG  
AAGATAGGAAGATGGCAGAAGGCTTTGTAGTGGTGAGGCCAGGTCTAGACCTAGCTCT  
GCGTTTTTCAGCTCTGTCACCAT

>1615

CCTGGAAATCTGGTCTTTTGGAGAGAGGTTGTTGGTTGTGAAGATAGGAAGATGGCAG  
AAGGCTTTGTAGTGGTGAGGCCAGGTCTAGACCTAGCTCTGCGTTTTTCAGCTCTGTCA  
CCATTGACATCGTTTTTTTCATC

>1616

ATCTGGTCTTTTGGAGAGAGGTTGTTGGTTGTGAAGATAGGAAGATGGCAGAAGGCTT  
TGTAGTGGTGAGGCCAGGTCTAGACCTAGCTCTGCGTTTTTCAGCTCTGTCACCATTGA  
CATCGTTTTTTTCATCGTAAGCC

>1617

TGGAGAGAGGTTGTTGGTTGTGAAGATAGGAAGATGGCAGAAGGCTTTGTAGTGGTG

AGGCCAGGTCTAGACCTAGCTCTGCGTTTTTCAGCTCTGTCACCATTGACATCGTTTTT  
TTCATCGTAAGCCTTAACTTCTTC

>1618

AGGCCAGGTCTAGACCTAGCTCTGCGTTTTTCAGCTCTGTCACCATTGACATCGTTTTT  
TTCATCGTAAGCCTTAACTTCTTCATTTTTAAACTAGGCACTCAGTGAGCTCTTCTG  
GATTGTTGCGCTCTTTAAAAA

>1619

TTTTCAGCTCTGTCACCATTGACATCGTTTTTTTCATCGTAAGCCTTAACTTCTTCATTTT  
TAAACTAGGCACTCAGTGAGCTCTTCTGGATTGTTGCGCTCTTTAAAAAATTCTTTT  
ATTCTTTGTGTACCCACTT

>1620

CACCATTGACATCGTTTTTTTCATCGTAAGCCTTAACTTCTTCATTTTTAAACTAGGCA  
CTTCAGTGAGCTCTTCTGGATTGTTGCGCTCTTTAAAAAATTCTTTTATTCTTTGTGTA  
CCCACTTATATCTTCATGAA

>1621

TCTTTCTGGATTGTTGCGCTCTTTAAAAAATTCTTTTATTCTTTGTGTACCCACTTATATC  
TTCATGAAGTCCTTTGGTTAATTGAATTTGCTGTTTTGGAATCTGGATTGGCAGTTCA  
GCCAGTTAAGTAGGGGGTC

>1622

TACCCACTTATATCTTCATGAAGTCCTTTGGTTAATTGAATTTGCTGTTTTGGAATCTG  
GATTGGCAGTTCAGCCAGTTAAGTAGGGGGTCAGTTTGATTGATTCTGTGTGTTCTGA  
CTTTTTTTTTTTTTTAAAT

>1623

ACTTATATCTTCATGAAGTCCTTTGGTTAATTGAATTTGCTGTTTTGGAATCTGGATTG  
GCAGTTCAGCCAGTTAAGTAGGGGGTCAGTTTGATTGATTCTGTGTGTTCTGACTTTT  
TTTTTTTTTTTAAACTTT

>1624

ATATCTTCATGAAGTCCTTTGGTTAATTGAATTTGCTGTTTTGGAATCTGGATTGGCA  
GTTACGCCAGTTAAGTAGGGGGTCAGTTTGATTGATTCTGTGTGTTCTGACTTTTTTTT  
TTTTTTTAAACTTTAACC

>1625

CTTTTGGTTAATTGAATTTGCTGTTTTGGAATCTGGATTGGCAGTTCAGCCAGTTAAGT  
AGGGGGTCAGTTGATTGATTCTGTGTGTTCTGACTTTTTTTTTTTTTTAAACTTTA  
ACCTGCTTAGGGTTACTGA

>1626

GGGGGTCAGTTTGATTGATTCTGTGTGTTCTGACTTTTTTTTTTTTTTAAACTTTAA  
CCTGCTTAGGGTTACTGAGCCATCTGGGATCTAGACTGAACTCTGGAACCTTTGAAGA  
TGATTTCTTTATTTTATT

>1627

TTGATTTGATTCTGTGTGTTCTGACTTTTTTTTTTTTTTAAACTTTAACCTGCTTAGG  
GTTACTGAGCCATCTGGGATCTAGACTGAACTCTGGAACCTTTGAAGATGATTTCTT  
TATTTTATTTCAATGGAGG

>1628

TAAACTTTAACCTGCTTAGGGTTACTGAGCCATCTGGGATCTAGACTGAACTCTTGG  
AACTTTTGAAGATGATTTCTTTATTTTATTTTCAATGGAGAAAGTTGCCCACTCTTTC  
ATCTCAGTGAGAAGTCCCAT



>1629

GCCATCTGGGATCTAGACTGAACTCTTGGAACTTTTGAAGATGATTCCTTTATTTTATT  
TTCAATGGAGGAAAGTTGCCCACTCTTTCATCTCAGTGAGAAGTCCCATTTAATTTGC  
CATCACTATTGGATGGAGCCG

>1630

TGGAACTTTTGAAGATGATTCCTTTATTTTATTTTCAATGGAGGAAAGTTGCCCACTCT  
TTCATCTCAGTGAGAAGTCCCATTTAATTTGCCATCACTATTGGATGGAGCCGCTAATT  
GCTGGGAGGGAGAAAGCTAT

>1631

ACTTTTGAAGATGATTCCTTTATTTTATTTTCAATGGAGGAAAGTTGCCCACTCTTTCA  
TCTCAGTGAGAAGTCCCATTTAATTTGCCATCACTATTGGATGGAGCCGCTAATTGCTG  
GGAGGGAGAAAGCTATAGTT

>1632

GAGGAAAGTTGCCCACTCTTTCATCTCAGTGAGAAGTCCCATTTAATTTGCCATCACT  
ATTGGATGGAGCCGCTAATTGCTGGGAGGGAGAAAGCTATAGTTTAGCAACATGTTTTTC  
CTCCTGCTCGTTCTAGGAAAAC

>1633

CTTTCATCTCAGTGAGAAGTCCCATTTAATTTGCCATCACTATTGGATGGAGCCGCTAA  
TTGCTGGGAGGGAGAAAGCTATAGTTTAGCAACATGTTTTCTCCTGCTCGTTCTAGGA  
AACTATTATGAATCTTTAAA

>1634

CATCTCAGTGAGAAGTCCCATTTAATTTGCCATCACTATTGGATGGAGCCGCTAATTGC  
TGGGAGGGAGAAAGCTATAGTTTAGCAACATGTTTTCTCCTGCTCGTTCTAGGAAAA  
CTATTATGAATCTTTAAAATAG

>1635

TCCCATTTAATTTGCCATCACTATTGGATGGAGCCGCTAATTGCTGGGAGGGAGAAAG  
CTATAGTTTAGCAACATGTTTTCTCCTGCTCGTTCTAGGAAAACCTATTATGAATCTTTA  
AAATAGTGATTATCCTAAACT

>1636

ATGGAGCCGCTAATTGCTGGGAGGGAGAAAGCTATAGTTTAGCAACATGTTTTCTCCT  
GCTCGTTCTAGGAAAACCTATTATGAATCTTTAAAATAGTGATTATCCTAAACTGTTAAAA  
TCAAATTCTATTACAGCTCT

>1637

AAAGCTATAGTTTAGCAACATGTTTTCTCCTGCTCGTTCTAGGAAAACCTATTATGAATC  
TTTAAAATAGTGATTATCCTAAACTGTTAAAATCAAATTCTATTACAGCTCTTTGATTTCT  
TTGCTAATTCAGGAGAGAA

>1638

CTAGGAAAACCTATTATGAATCTTTAAAATAGTGATTATCCTAAACTGTTAAAATCAAATT  
CTATTACAGCTCTTTGATTTCTGCTAATTCAGGAGAGAAAACCTTTCCAATCACTTTAA  
TTTTTTTTTATTAATTTAAAG

>1639

AAAATAGTGATTATCCTAAACTGTTAAAATCAAATTCTATTACAGCTCTTTGATTTCTT  
GCTAATTCAGGAGAGAAAACCTTTCCAATCACTTTAATTTTTTTTATTAATTTAAAGCAAG  
CCCTGCTGAAAGCCCAAGTA

>1640

AGTGATTATCCTAAACTGTTAAAATCAAATTCTATTACAGCTCTTTGATTTCTTGCTAAT

TCAGGAGAGAACTTTTCCAATCACTTTAATTTTTTTTATTAATTTAAAGCAAGCCCTGC  
TGAAAGCCCAAGTATATAT

>1641

CTCTTTGATTTCTTGCTAATTCAGGAGAGAACTTTTCCAATCACTTTAATTTTTTTTATT  
AATTTAAAGCAAGCCCTGCTGAAAGCCCAAGTATATATGACTTAGAGTCTTACTAAATG  
AATACAGGTGTGCCTCAGTT

>1642

TTGATTTCTTGCTAATTCAGGAGAGAACTTTTCCAATCACTTTAATTTTTTTTATTAATT  
TAAAGCAAGCCCTGCTGAAAGCCCAAGTATATATGACTTAGAGTCTTACTAAATGAATA  
CAGGTGTGCCTCAGTTTGTC

>1643

AGGAGAGAACTTTTCCAATCACTTTAATTTTTTTTATTAATTTAAAGCAAGCCCTGCTG  
AAAGCCCAAGTATATATGACTTAGAGTCTTACTAAATGAATACAGGTGTGCCTCAGTTT  
GTCCATTGGAGGGTTTCTGAA

>1644

TATTAATTTAAAGCAAGCCCTGCTGAAAGCCCAAGTATATATGACTTAGAGTCTTACTAA  
ATGAATACAGGTGTGCCTCAGTTTGTCCATTGGAGGGTTTCTGAATTTTCCATAACTAA  
AGATTTTCTATTCTGTTTTGG

>1645

AGCAAGCCCTGCTGAAAGCCCAAGTATATATGACTTAGAGTCTTACTAAATGAATACAG  
GTGTGCCTCAGTTTGTCCATTGGAGGGTTTCTGAATTTTCCATAACTAAAGATTTCTAT  
TCTGTTTTGGCTGGGTGTGTG

>1646

AAAGCCCAAGTATATATGACTTAGAGTCTTACTAAATGAATACAGGTGTGCCTCAGTTT  
GTCCATTGGAGGGTTTCTGAATTTTCCATAACTAAAGATTTTCTATTCTGTTTTGGCTGG  
GTGTGTGGGGTGAAAGCTCTT

>1647

TCTTACTAAATGAATACAGGTGTGCCTCAGTTTGTCCATTGGAGGGTTTCTGAATTTTCC  
ATAACTAAAGATTTTCTATTCTGTTTTGGCTGGGTGTGTGGGGTGAAAGCTCTTACTCTC  
TGGCAGTTATTTAAGTAGTA

>1648

TGGAGGGTTTCTGAATTTTCCATAACTAAAGATTTTCTATTCTGTTTTGGCTGGGTGTGT  
GGGGTGAAAGCTCTTACTCTCTGGCAGTTATTTAAGTAGTAAGAAATTTGCTACAACCTC  
TTCCCCACCCACGTTTAC

>1649

TTCCATAACTAAAGATTTTCTATTCTGTTTTGGCTGGGTGTGTGGGGTGAAAGCTCTTAC  
TCTCTGGCAGTTATTTAAGTAGTAAGAAATTTGCTACAACCTTCCCCACCCACGTTT  
TACAGATAGGAAATGAGCAC

>1650

TAAAGATTTTCTATTCTGTTTTGGCTGGGTGTGTGGGGTGAAAGCTCTTACTCTCTGGC  
AGTTATTTAAGTAGTAAGAAATTTGCTACAACCTTCCCCACCCACGTTTACAGATA  
GGAAATGAGCACTTTGACTGT

>1651

AGATTTTCTATTCTGTTTTGGCTGGGTGTGTGGGGTGAAAGCTCTTACTCTCTGGCAGT  
TATTTAAGTAGTAAGAAATTTGCTACAACCTTCCCCACCCACGTTTACAGATAGG  
AAATGAGCACTTTGACTGTCCA

>1652

CTTACTCTCTGGCAGTTATTTAAGTAGTAAGAAATTTGCTACAACCTTCCCCACCCCCA  
CGTTTTACAGATAGGAAATGAGCACTTTGACTGTCCAGGTCAGACTTCTGATTTTGCTA  
CTTACTAACTGTGACAGTGGT

>1653

CAGTTATTTAAGTAGTAAGAAATTTGCTACAACCTTCCCCACCCCCACGTTTTACAGAT  
AGGAAATGAGCACTTTGACTGTCCAGGTCAGACTTCTGATTTTGCTACTTACTAACTGT  
GACAGTGGTTGTGTTACTTAA

>1654

AAGAAATTTGCTACAACCTTCCCCACCCCCACGTTTTACAGATAGGAAATGAGCACTT  
TGACTGTCCAGGTCAGACTTCTGATTTTGCTACTTACTAACTGTGACAGTGGTTGTGTT  
ACTTAACTTCTGTGTGCCTGTT

>1655

ACAGATAGGAAATGAGCACTTTGACTGTCCAGGTCAGACTTCTGATTTTGCTACTTACT  
AACTGTGACAGTGGTTGTGTTACTTAACTTCTGTGTGCCTGTTTGCTCATTGTGAAAC  
AGAAATAATAGTAGTACCTACT

>1656

CTACTTACTAACTGTGACAGTGGTTGTGTTACTTAACTTCTGTGTGCCTGTTTGCTCATT  
TGTTGAAACAGAAATAATAGTAGTACCTACTTCTGTTGTTATAAGGATTCATCAGA  
AAATATTTATCCTGTGTGAGG

>1657

AACTGTGACAGTGGTTGTGTTACTTAACTTCTGTGTGCCTGTTTGCTCATTGTGAAAC  
AGAAATAATAGTAGTACCTACTTCTGTTGTTATAAGGATTCATCAGAAAATATTTA  
TCCTGTGTGAGGAACGGTGGC

>1658

TGTGACAGTGGTTGTGTTACTTAACTTCTGTGTGCCTGTTTGCTCATTGTGAAACAGA  
AATAATAGTAGTACCTACTTCTGTTGTTATAAGGATTCATCAGAAAATATTTATCCT  
GTGTGAGGAACGGTGGCACA

>1659

TCTGTGTGCCTGTTTGCTCATTGTGAAACAGAAATAATAGTAGTACCTACTTCTGTTGGG  
TTGTTATAAGGATTCATCAGAAAATATTTATCCTGTGTGAGGAACGGTGGCACATAGTA  
AGTGCTCCATAAGTGTGTTGCT

>1660

TGTTTGCTCATTGTGAAACAGAAATAATAGTAGTACCTACTTCTGTTGGTGTGTTATAAG  
GATTCATCAGAAAATATTTATCCTGTGTGAGGAACGGTGGCACATAGTAAGTGCTCCAT  
AAGTGTGTTGCTAGGGTATTTT

>1661

CTACTTCTGTTGGTGTGTTATAAGGATTCATCAGAAAATATTTATCCTGTGTGAGGAACGG  
TGGCACATAGTAAGTGCTCCATAAGTGTGTTGCTAGGGTATTTTCTTGTGATTGTGTGAA  
GTAGGTCATGCTAGCCATGC

>1662

TTCATTGGGTTGTGTTATAAGGATTCATCAGAAAATATTTATCCTGTGTGAGGAACGGTGGC  
ACATAGTAAGTGCTCCATAAGTGTGTTGCTAGGGTATTTTCTTGTGATTGTGTGAAGTAG  
GTCATGCTAGCCATGCAGGG

>1663

TTCATCAGAAAATATTTATCCTGTGTGAGGAACGGTGGCACATAGTAAGTGCTCCATAA

GTGTTTGTAGGGTATTTTTCTTGTCATTGTGTGAAGTAGGTCATGCTAGCCATGCAGG  
GTGAAAAATGTGTTTCATGTTGG

>1664

GAGGAACGGTGGCACATAGTAAGTGCTCCATAAGTGTGGCTAGGGTATTTTTCTTGTC  
ATTGTGTGAAGTAGGTCATGCTAGCCATGCAGGGTGAAAAATGTGTTTCATGTTGGTCCA  
GATCCTGCTTTCTCCCTGAGAC

>1665

GAACGGTGGCACATAGTAAGTGCTCCATAAGTGTGGCTAGGGTATTTTTCTTGTCATTG  
TGTGAAGTAGGTCATGCTAGCCATGCAGGGTGAAAAATGTGTTTCATGTTGGTCCAGATC  
CTGCTTTCTCCCTGAGACCGT

>1666

ACATAGTAAGTGCTCCATAAGTGTGGCTAGGGTATTTTTCTTGTCATTGTGTGAAGTAG  
GTCATGCTAGCCATGCAGGGTGAAAAATGTGTTTCATGTTGGTCCAGATCCTGCTTTCTC  
CCTGAGACCGTTCCTCCGCAT

>1667

TTTTCTTGTCATTGTGTGAAGTAGGTCATGCTAGCCATGCAGGGTGAAAAATGTGTTCA  
TGTTGGTCCAGATCCTGCTTTCTCCCTGAGACCGTTCCTCCGCATAGGCGTCAATCCGT  
ACAGTGCTGTAAAAGTCTGCC

>1668

AGTAGGTCATGCTAGCCATGCAGGGTGAAAAATGTGTTTCATGTTGGTCCAGATCCTGCT  
TTCTCCCTGAGACCGTTCCTCCGCATAGGCGTCAATCCGTACAGTGCTGTAAAAGTCTGCC  
GCCTCGGGCACCTCATGTTGG

>1669

ATGCAGGGTGAAAAATGTGTTTCATGTTGGTCCAGATCCTGCTTTCTCCCTGAGACCGTT  
CTTCCGCATAGGCGTCAATCCGTACAGTGCTGTAAAAGTCTGCCCTCGGGCACCTCATG  
TTTGGGGCTGAGACATTGCTTC

>1670

GTGTTTCATGTTGGTCCAGATCCTGCTTTCTCCCTGAGACCGTTCCTCCGCATAGGCGTC  
AATCCGTACAGTGCTGTAAAAGTCTGCCCTCGGGCACCTCATGTTTGGGGCTGAGACA  
TTGCTTCTGCGTCTCCCCAGAA

>1671

TTCCGCATAGGCGTCAATCCGTACAGTGCTGTAAAAGTCTGCCCTCGGGCACCTCATGT  
TTGGGGCTGAGACATTGCTTCTGCGTCTCCCCAGAAGCTGATCTCTTGTACTGTGGTG  
GCCAGGGTACTCTTTGTCCCAT

>1672

AGTGCTGTAAAAGTCTGCCCTCGGGCACCTCATGTTTGGGGCTGAGACATTGCTTCTG  
CGTCTTCCCCAGAAGCTGATCTCTTGTACTGTGGTGGCCAGGGTACTCTTTGTCCATT  
GACCTGAGGCCTGGTGAATCATT

>1673

TCATGTTTGGGGCTGAGACATTGCTTCTGCGTCTCCCCAGAAGCTGATCTCTTGTACT  
GTGGTGGCCAGGGTACTCTTTGTCCATTGACCTGAGGCCTGGTGAATCATTCCAGTTC  
TCGTTTAAATTTAGCCGGGCAG

>1674

CTGCGTCTTCCCCAGAAGCTGATCTCTTGTACTGTGGTGGCCAGGGTACTCTTTGTCCC  
ATTGACCTGAGGCCTGGTGAATCATTCCAGTTCGTTTAAATTTAGCCGGGCAGCGCT  
CCTACTGCCATCGGGTCCAAATG

>1675

TGATCTTGTACTGTGGTGGCCAGGGTACTCTTTGTCCCATTGACCTGAGGCCTGGTG  
AGTCATTCCAGTTCTCGTTAAATTTAGCCGGGCAGCGCTCCACTGCCATCGGGTCCAA  
ATGCCGGGGAGGCTCACTGATG

>1676

GTGGCCAGGGTACTCTTTGTCCCATTGACCTGAGGCCTGGTGAGTCATTCCAGTTCTCG  
TTAAATTTAGCCGGGCAGCGCTCCACTGCCATCGGGTCCAAATGCCGGGGAGGCTCA  
CTGATGCGGTGTCCTGTTGCCTG

>1677

AGTCATTCCAGTTCTCGTTAAATTTAGCCGGGCAGCGCTCCACTGCCATCGGGTCCAA  
ATGCCGGGGAGGCTCACTGATGCGGTGTCCTGTTGCCTGTGCACGTGGCCAGGCGTGC  
ACATCACTGTGCTTATGAGAGAG

>1678

CACTGCCATCGGGTCCAAATGCCGGGGAGGCTCACTGATGCGGTGTCCTGTTGCCTGT  
GCACGTGGCCAGGCGTGCACATCACTGTGCTTATGAGAGAGATGAAGAGCACAGATAC  
CACCTTACTGATGGGGGTCCTGGG

>1679

GGAGGCTCACTGATGCGGTGTCCTGTTGCCTGTGCACGTGGCCAGGCGTGCACATCAC  
TGTGCTTATGAGAGAGATGAAGAGCACAGATACCACCTTACTGATGGGGGTCCTGGGG  
CTGGGCTTGTGGGTGTTGGGGGTT

>1680

AGGCTCACTGATGCGGTGTCCTGTTGCCTGTGCACGTGGCCAGGCGTGCACATCACTG  
TGCTTATGAGAGAGATGAAGAGCACAGATACCACCTTACTGATGGGGGTCCTGGGGCT  
GGGCTTGTGGGTGTTGGGGGTTCC

>1681

GTGTCCTGTTGCCTGTGCACGTGGCCAGGCGTGCACATCACTGTGCTTATGAGAGAGA  
TGAAGAGCACAGATACCACCTTACTGATGGGGGTCCTGGGGCTGGGCTTGTGGGTGTT  
GGGGGTTCCAGAGCTCCTTCCCTT

>1682

ATGAAGAGCACAGATACCACCTTACTGATGGGGGTCCTGGGGCTGGGCTTGTGGGTGT  
TGGGGGTTCCAGAGCTCCTTCCCTTTCCTGCCTGTCAGTGCAGGATGCTTCTAAAATGT  
GGA CT CAG CAG AC ATT G T T T T G A

>1683

GAAGAGCACAGATACCACCTTACTGATGGGGGTCCTGGGGCTGGGCTTGTGGGTGTTG  
GGGGTCCAGAGCTCCTTCCCTTTCCTGCCTGTCAGTGCAGGATGCTTCTAAAATGTGG  
ACTCAGCAGACATTGTTTTGAGT

>1684

GGGTCCTGGGGCTGGGCTTGTGGGTGTTGGGGGTTCCAGAGCTCCTTCCCTTTCCTGC  
CTGTCAGTGCAGGATGCTTCTAAAATGTGGA CT CAG CAG AC ATT G T T T T G A G T G C T T G C  
TACATGTCAGATTCTGTGCTAAG

>1685

TGTTGGGGGTTCCAGAGCTCCTTCCCTTTCCTGCCTGTCAGTGCAGGATGCTTCTAAA  
TGTGGA CT CAG CAG AC ATT G T T T T G A G T G C T T G C T A C A T G T C A G A T T C T G T G C T A A G T G  
CACTCACAGCCAGCATCTCTGT

>1686

TGGGGGTTCCAGAGCTCCTTCCCTTTCCTGCCTGTCAGTGCAGGATGCTTCTAAAATGT

GGACTCAGCAGACATTGTTTTGAGTGCTTGCTACATGTCAGATTCTGTGCTAAGTGCAC  
TCACAGCCAGCATCTCTGTAAG

>1687

CCTGTCAAGTGCAGGATGCTTCTAAAATGTGGACTCAGCAGACATTGTTTTGAGTGCTTG  
CTACATGTCAGATTCTGTGCTAAGTGCCTCACAGCCAGCATCTCTGTAAGACCTCTAG  
CTGTCCTGTAAGGTGGGTATCA

>1688

GATGCTTCTAAAATGTGGACTCAGCAGACATTGTTTTGAGTGCTTGCTACATGTCAGAT  
TCTGTGCTAAGTGCCTCACAGCCAGCATCTCTGTAAGACCTCTAGCTGTCCTGTAAGG  
TGGGTATCAGTTTCACATTCTC

>1689

AATGTGGACTCAGCAGACATTGTTTTGAGTGCTTGCTACATGTCAGATTCTGTGCTAAG  
TGCACTCACAGCCAGCATCTCTGTAAGACCTCTAGCTGTCCTGTAAGGTGGGTATCAGT  
TTCACATTCTCAGATGGGCGGA

>1690

ACATTGTTTTGAGTGCTTGCTACATGTCAGATTCTGTGCTAAGTGCCTCACAGCCAGC  
ATCTCTGTAAGACCTCTAGCTGTCCTGTAAGGTGGGTATCAGTTTCACATTCTCAGATG  
GGCGGAGAGAAGCCCAAGAGGT

>1691

TTCTGTGCTAAGTGCCTCACAGCCAGCATCTCTGTAAGACCTCTAGCTGTCCTGTAAG  
GTGGGTATCAGTTTCACATTCTCAGATGGGCGGAGAGAAGCCCAAGAGGTTAGTGGAC  
TTTTCTCTAGTAAAGAGTTGTAC

>1692

CACTCACAGCCAGCATCTCTGTAAGACCTCTAGCTGTCCTGTAAGGTGGGTATCAGTTT  
CACATTCTCAGATGGGCGGAGAGAAGCCCAAGAGGTTAGTGGACTTTTCTCTAGTAAA  
GAGTTGTACAGGCCGGGCGCAGT

>1693

CAGCATCTCTGTAAGACCTCTAGCTGTCCTGTAAGGTGGGTATCAGTTTCACATTCTCA  
GATGGGCGGAGAGAAGCCCAAGAGGTTAGTGGACTTTTCTCTAGTAAAGAGTTGTACA  
GGCCGGGCGCAGTGGCTCATGCC

>1694

AGGTGGGTATCAGTTTCACATTCTCAGATGGGCGGAGAGAAGCCCAAGAGGTTAGTGG  
ACTTTTCTCTAGTAAAGAGTTGTACAGGCCGGGCGCAGTGGCTCATGCCTGTAATCCCA  
GCACTTTGGGAGGCCGAGGCGGG

>1695

GGTATCAGTTTCACATTCTCAGATGGGCGGAGAGAAGCCCAAGAGGTTAGTGGACTTT  
TCTCTAGTAAAGAGTTGTACAGGCCGGGCGCAGTGGCTCATGCCTGTAATCCAGCAC  
TTTGGGAGGCCGAGGCGGGCGGAT

>1696

TCACATTCTCAGATGGGCGGAGAGAAGCCCAAGAGGTTAGTGGACTTTTCTCTAGTAA  
AGAGTTGTACAGGCCGGGCGCAGTGGCTCATGCCTGTAATCCAGCACTTTGGGAGGC  
CGAGGCGGGCGGATCACGAGGTCA

>1697

AGGTTAGTGGACTTTTCTCTAGTAAAGAGTTGTACAGGCCGGGCGCAGTGGCTCATGC  
CTGTAATCCAGCACTTTGGGAGGCCGAGGCGGGCGGATCACGAGGTCAGGAGATCG  
AGACCATCCTGGCTAACACAGTGAA

>1698

CTTTTCTCTAGTAAAGAGTTGTACAGGCCGGGCGCAGTGGCTCATGCCTGTAATCCCAG  
CACTTTGGGAGGCCGAGGCCGGGCGGATCACGAGGTCAGGAGATCGAGACCATCCTGG  
CTAACACAGTGAAACCCCGTCTCT

>1699

TCTAGTAAAGAGTTGTACAGGCCGGGCGCAGTGGCTCATGCCTGTAATCCCAGCACTT  
TGGGAGGCCGAGGCCGGGCGGATCACGAGGTCAGGAGATCGAGACCATCCTGGCTAAC  
ACAGTGAAACCCCGTCTCTACTAAA

>1700

ACAGGCCGGGCGCAGTGGCTCATGCCTGTAATCCCAGCACTTTGGGAGGCCGAGGCCG  
GGCGGATCACGAGGTCAGGAGATCGAGACCATCCTGGCTAACACAGTGAAACCCCGT  
CTCTACTAAAAATACAAAAAATTAGC

>1701

GTGGCTCATGCCTGTAATCCCAGCACTTTGGGAGGCCGAGGCCGGGCGGATCACGAGGT  
CAGGAGATCGAGACCATCCTGGCTAACACAGTGAAACCCCGTCTCTACTAAAAATACA  
AAAAATTAGCCGGGCGTGGTGGGG

>1702

GGTCAGGAGATCGAGACCATCCTGGCTAACACAGTGAAACCCCGTCTCTACTAAAAAT  
ACAAAAAATTAGCCGGGCGTGGTGGGGGGCGCCTGTAGTCCCAGCTACTCGGGAGGC  
TGAGGCAGGAGAATGGCGTGAACCC

>1703

TAACACAGTGAAACCCCGTCTCTACTAAAAATACAAAAAATTAGCCGGGCGTGGTGGG  
GGGCGCCTGTAGTCCCAGCTACTCGGGAGGCTGAGGCAGGAGAATGGCGTGAACCCG  
GGAGGCAGAGCTTGCACTGAGCCGA

>1704

AGTGAAACCCCGTCTCTACTAAAAATACAAAAAATTAGCCGGGCGTGGTGGGGGGCGC  
CTGTAGTCCCAGCTACTCGGGAGGCTGAGGCAGGAGAATGGCGTGAACCCGGGAGGC  
AGAGCTTGCACTGAGCCGAGATCAT

>1705

GTCTCTACTAAAAATACAAAAAATTAGCCGGGCGTGGTGGGGGGCGCCTGTAGTCCCA  
GCTACTCGGGAGGCTGAGGCAGGAGAATGGCGTGAACCCGGGAGGCAGAGCTTGCACT  
TGAGCCGAGATCATGCCACTACTA

>1706

ACTAAAAATACAAAAAATTAGCCGGGCGTGGTGGGGGGCGCCTGTAGTCCCAGCTACT  
CGGGAGGCTGAGGCAGGAGAATGGCGTGAACCCGGGAGGCAGAGCTTGCACTGAGC  
CGAGATCATGCCACTACTACTACTCC

>1707

CGTGGTGGGGGGCGCCTGTAGTCCCAGCTACTCGGGAGGCTGAGGCAGGAGAATGGC  
GTGAACCCGGGAGGCAGAGCTTGCACTGAGCCGAGATCATGCCACTACTACTACTCC  
AGCCTGGGCAAAGGAGTGAGACTGTC

>1708

GCCTGTAGTCCCAGCTACTCGGGAGGCTGAGGCAGGAGAATGGCGTGAACCCGGGAG  
GCAGAGCTTGCACTGAGCCGAGATCATGCCACTACTACTACTCCAGCCTGGGCAAAG  
GAGTGAGACTGTCTCAAAAAAAAAA

>1709

GTAGTCCCAGCTACTCGGGAGGCTGAGGCAGGAGAATGGCGTGAACCCGGGAGGCAG

AGCTTGCACTGAGCCGAGATCATGCCACTCACTACTCCAGCCTGGGCAAAGGAGTG  
AGACTGTCTCAAAAAAAAAAAAAAAAAA  
>1710  
CCCAGCTACTCGGGAGGCTGAGGCAGGAGAATGGCGTGAACCCGGGAGGCAGAGCTT  
GCAGTGAGCCGAGATCATGCCACTCACTACTCCAGCCTGGGCAAAGGAGTGAGAC  
TGTCTCAAAAAAAAAAAAAAAAAA  
>1711  
AGGAGAATGGCGTGAACCCGGGAGGCAGAGCTTGCAGTGAGCCGAGATCATGCCACT  
CACTACTCCAGCCTGGGCAAAGGAGTGAGACTGTCTCAAAAAAAAAAAAAAAAAA  
AAAAGAGTTGTACCAGGATTTATGTTC  
>1712  
CGGGAGGCAGAGCTTGCAGTGAGCCGAGATCATGCCACTCACTACTCCAGCCTGG  
GCAAAGGAGTGAGACTGTCTCAAAAAAAAAAAAAAAAAAAGAGTTGTACCAGGA  
TTTATGTTTCAGGTCTTCTGGCTCCATG  
>1713  
CATGCCACTCACTACTCCAGCCTGGGCAAAGGAGTGAGACTGTCTCAAAAAAAAAA  
AAAAAAAAAAGAGTTGTACCAGGATTTATGTTTCAGGTCTTCTGGCTCCATGCTCTCT  
GCAGCTGGGTGACCAGGGGGCTCA  
>1714  
TGCCACTCACTACTCCAGCCTGGGCAAAGGAGTGAGACTGTCTCAAAAAAAAAA  
AAAAAAAAAAGAGTTGTACCAGGATTTATGTTTCAGGTCTTCTGGCTCCATGCTCTCTGC  
AGCTGGGTGACCAGGGGGCTCATG  
>1715  
AAAAAAAAAAAAAAAAAAGAGTTGTACCAGGATTTATGTTTCAGGTCTTCTGGCTCCA  
TGCTCTCTGCAGCTGGGTGACCAGGGGGCTCATGGCTTACCAGCTCTGGCCTCCTCA  
GTTCTCTGGTGGCTTCTGCGAG  
>1716  
AAAAAAGAGTTGTACCAGGATTTATGTTTCAGGTCTTCTGGCTCCATGCTCTCTGCAGC  
TGGGTGACCAGGGGGCTCATGGCTTACCAGCTCTGGCCTCCTCAGTTCCTCTGGTGG  
CTTCTTGCAGGAGGAAGGTTAC  
>1717  
ATTTATGTTTCAGGTCTTCTGGCTCCATGCTCTCTGCAGCTGGGTGACCAGGGGGCTCAT  
GGCTTACCAGCTCTGGCCTCCTCAGTTCCTCTGGTGGCTTCTTGCAGGAGGAAGGT  
TACTGCAGAGGGTTCAGCTCTT  
>1718  
CTGGGTGACCAGGGGGCTCATGGCTTACCAGCTCTGGCCTCCTCAGTTCCTCTGGTG  
GCTTCTTGCAGGAGGAAGGTTACTGCAGAGGGTTCAGCTCTTtaggggcccagggc  
GCATGGATCCAAGGACTAGTACGTC  
>1719  
GGTGACCAGGGGGCTCATGGCTTACCAGCTCTGGCCTCCTCAGTTCCTCTGGTGGCT  
TCTTGCAGGAGGAAGGTTACTGCAGAGGGTTCAGCTCTTtaggggcccagggccat  
GGATCCAAGGACTAGTACGTCATC  
>1720  
CACCAGCTCTGGCCTCCTCAGTTCCTCTGGTGGCTTCTTGCAGGAGGAAGGTTACTG  
CAGAGGGTTCAGCTCTTtaggggcccagggccatGGATCCAAGGACTAGTACGTCAT  
CTTTACCAACACAGAGAGATCAG



>1721

CTCAGTTCCTCTGGTGGCTTCTTGCGAGGAGGAAGGTTACTGCAGAGGGTTCAGCTCT  
TTAGGGGCCAGGCCGCATGGATCCAAGGACTAGTACGTCATCTTTACCAACACAGA  
GAGATCAGCTTCTAGTGATAGAGG

>1722

GCTTCTTGCGAGGAGGAAGGTTACTGCAGAGGGTTCAGCTCTTTAGGGGCCAGGCC  
GCATGGATCCAAGGACTAGTACGTCATCTTTACCAACACAGAGAGATCAGCTTCTAGT  
GATAGAGGCCTTTTATGCTGACTT

>1723

TGCGAGGAGGAAGGTTACTGCAGAGGGTTCAGCTCTTTAGGGGCCAGGCCGCATGG  
ATCCAAGGACTAGTACGTCATCTTTACCAACACAGAGAGATCAGCTTCTAGTGATAGA  
GGCCTTTTATGCTGACTTGAAAAA

>1724

GGTTCAGCTCTTTAGGGGCCAGGCCGCATGGATCCAAGGACTAGTACGTCATCTTTA  
CCAACACAGAGAGATCAGCTTCTAGTGATAGAGGCCTTTTATGCTGACTTGAAAAACA  
GAAAAAGAGAGAAAAAAGAAACC

>1725

GGGGCCAGGCCGCATGGATCCAAGGACTAGTACGTCATCTTTACCAACACAGAGAG  
ATCAGCTTCTAGTGATAGAGGCCTTTTATGCTGACTTGAAAAACAGAAAAAGAGAGAA  
AAAAGAAACCCATTTACAAAAATA

>1726

CAGGCCGCATGGATCCAAGGACTAGTACGTCATCTTTACCAACACAGAGAGATCAGC  
TTCTAGTGATAGAGGCCTTTTATGCTGACTTGAAAAACAGAAAAAGAGAGAAAAAAG  
AAACCCATTTACAAAAATAAAAATC

>1727

GTCATCTTTACCAACACAGAGAGATCAGCTTCTAGTGATAGAGGCCTTTTATGCTGAC  
TTGAAAAACAGAAAAAGAGAGAAAAAAGAAACCCATTTACAAAAATAAAAATCCCAT  
GCTGTTAATTTTCATGCCAGCATAA

>1728

CAGAGAGATCAGCTTCTAGTGATAGAGGCCTTTTATGCTGACTTGAAAAACAGAAAAA  
GAGAGAAAAAAGAAACCCATTTACAAAAATAAAAATCCCATGCTGTTAATTTTCATGCC  
AGCATAATCAGAAATTCCTTTTC

>1729

AACAGAAAAAGAGAGAAAAAAGAAACCCATTTACAAAAATAAAAATCCCATGCTGTT  
AATTTTCATGCCAGCATAATCAGAAATTCCTTTTCTACTGTTTCCCTTAAAAGCCCCGG  
TGCCTTATTATGCTGGTGCAGT

>1730

AGAGAGAAAAAAGAAACCCATTTACAAAAATAAAAATCCCATGCTGTTAATTTTCATGC  
CAGCATAATCAGAAATTCCTTTTCTACTGTTTCCCTTAAAAGCCCCGGTGCCTTATT  
ATGCTGGTGCAGTCTGGAAAAA

>1731

AAAATCCCATGCTGTTAATTTTCATGCCAGCATAATCAGAAATTCCTTTTCTACTGTTTC  
CCCTTAAAAGCCCCGGTGCCTTATTATGCTGGTGCAGTCTGGAAAACTATGGTTGGG  
TTTTGCCTACGTGAGGCTTAT

>1732

GCATAATCAGAAATTCCTTTTCTACTGTTTCCCTTAAAAGCCCCGGTGCCTTATTAT

GCTGGTGCAGTCTGGAAAACTATGGTTGGGTTTTGCCTACGTGAGGCTTATCTCTGCA  
GCTGCAAGGAGGGGATCCGGT

>1733

TAAAAGCCCCGGTGTCTTATTATGCTGGTGCAGTCTGGAAAACTATGGTTGGGTTTT  
GCCTACGTGAGGCTTATCTCTGCAGCTGCAAGGAGGGGATCCGGTACTTTATTGTCAGC  
ATGGAACTTCCGCTAAATACT

>1734

TCCTTATTATGCTGGTGCAGTCTGGAAAACTATGGTTGGGTTTTGCCTACGTGAGGCT  
TATCTCTGCAGCTGCAAGGAGGGGATCCGGTACTTTATTGTCAGCATGGAACTTCCGC  
TAAATACTTAGAAAAACCTTAA

>1735

TGGTTGGGTTTTGCCTACGTGAGGCTTATCTCTGCAGCTGCAAGGAGGGGATCCGGTA  
CTTTATTGTCAGCATGGAACTTCCGCTAAATACTTAGAAAAACCTTAATTCTAAATTCC  
TAGCTCACTTCAACTGTGTCC

>1736

TATCTCTGCAGCTGCAAGGAGGGGATCCGGTACTTTATTGTCAGCATGGAACTTCCGC  
TAAATACTTAGAAAAACCTTAATTCTAAATTCTAGCTCACTTCAACTGTGTCTCGGG  
ACCTGATTTTCTTCGGTGTGA

>1737

TCCGGTACTTTATTGTCAGCATGGAACTTCCGCTAAATACTTAGAAAAACCTTAATTCT  
AAATTCTAGCTCACTTCAACTGTGTCTCGGGACCTGATTTTCTTCGGTGTGAACAG  
ATTGTGTTGAGCATTGCAGTA

>1738

ACCTTAATTCTAAATTCTAGCTCACTTCAACTGTGTCTCGGGACCTGATTTTCTTCG  
GTGTGAACAGATTGTGTTGAGCATTGCAGTAGAAAGGGTCCAAGTTAGGTAAGAGAAA  
GGACTTCTGAGACTGGGGT

>1739

AAATTCTAGCTCACTTCAACTGTGTCTCGGGACCTGATTTTCTTCGGTGTGAACAG  
ATTGTGTTGAGCATTGCAGTAGAAAGGGTCCAAGTTAGGTAAGAGAAAGGACTTCTCG  
AGACTGGGGTGTACTGAGAA

>1740

AGCTCACTTCAACTGTGTCTCGGGACCTGATTTTCTTCGGTGTGAACAGATTGTGTT  
CAGCATTGCAGTAGAAAGGGTCCAAGTTAGGTAAGAGAAAGGACTTCTGAGACT  
GGGGTGTACTGAGAAAGTTGTTA

>1741

GTGTCTCGGGACCTGATTTTCTTCGGTGTGAACAGATTGTGTTGAGCATTGCAGTAGA  
AAGGGTCCAAGTTAGGTAAGAGAAAGGACTTCTGAGACTGGGGTGTACTGAGA  
AAGTTGTTAGAAGACTGTCACAGA

>1742

GTGTGAACAGATTGTGTTGAGCATTGCAGTAGAAAGGGTCCAAGTTAGGTAAGAGAAA  
GGACTTCTGAGACTGGGGTGTACTGAGAAAGTTGTTAGAAGACTGTCACAGACA  
TTTTGATGAAGGGGGACATTCTG

>1743

AGCATTGCAGTAGAAAGGGTCCAAGTTAGGTAAGAGAAAGGACTTCTGAGACTG  
GGGTGTACTGAGAAAGTTGTTAGAAGACTGTCACAGACATTTGATGAAGGGGGGAC  
ATTCTGGGCCATTTGAAGTGGTTTT

>1744

TTGCAGTAGAAAGGGTCCAAGTTAGGTAAGAGAAAGGACTTCCTGAGACACTGGGGT  
GTTACTGAGAAAGTTGTTAGAAGACTGTCACAGACATTTTGTATGAAGGGGGGACATTC  
TGGGCCATTTGAAGTGGTTTTTAGA

>1745

GTTAGGTAAGAGAAAGGACTTCCTGAGACACTGGGGTGTACTGAGAAAGTTGTTAG  
AAGACTGTCACAGACATTTTGTATGAAGGGGGGACATTCTGGGCCATTTGAAGTGGTTT  
TTAGAGTTCTTTCCTCTTTAGGGCC

>1746

TACTGAGAAAGTTGTTAGAAGACTGTCACAGACATTTTGTATGAAGGGGGGACATTCTG  
GGCCATTTGAAGTGGTTTTTAGAGTTCTTTCCTCTTTAGGGCCATTTCGGTTCCCCCAGA  
AATAAGAAGAAAAGACATATACA

>1747

GTTGTTAGAAGACTGTCACAGACATTTTGTATGAAGGGGGGACATTCTGGGCCATTTGA  
AGTGGTTTTTAGAGTTCTTTCCTCTTTAGGGCCATTTCGGTTCCCCCAGAAATAAGAAGA  
AAAGACATATACACGCACATAAA

>1748

GGGGACATTCTGGGCCATTTGAAGTGGTTTTTAGAGTTCTTTCCTCTTTAGGGCCATTC  
GGTTCCCCCAGAAATAAGAAGAAAAGACATATACACGCACATAAAACCACCACCACCAG  
GCTTGCTGAGAACAAGTCAAATG

>1749

TTCTGGGCCATTTGAAGTGGTTTTTAGAGTTCTTTCCTCTTTAGGGCCATTTCGGTTCCCC  
CAGAAATAAGAAGAAAAGACATATACACGCACATAAAACCACCACCACCAGGCTTGCTG  
AGAACAAGTCAAATGTGCCACC

>1750

CATTTGAAGTGGTTTTTAGAGTTCTTTCCTCTTTAGGGCCATTTCGGTTCCCCCAGAAATA  
AGAAGAAAAGACATATACACGCACATAAAACCACCACCACCAGGCTTGCTGAGAACAA  
GTCAAATGTGCCACCAAACCATC

>1751

TTAGGGCCATTTCGGTTCCCCCAGAAATAAGAAGAAAAGACATATACACGCACATAAAC  
CACCACCACCAGGCTTGCTGAGAACAAGTCAAATGTGCCACCAAACCATCGTCTTAGT  
GGGAGATGGGGTGGCACTGCAGGG

>1752

TCGGTTCCCCCAGAAATAAGAAGAAAAGACATATACACGCACATAAAACCACCACCACC  
AGGCTTGCTGAGAACAAGTCAAATGTGCCACCAAACCATCGTCTTAGTGGGAGATGGG  
GTGGCACTGCAGGGGCAGAAAGAC

>1753

CCCCAGAAATAAGAAGAAAAGACATATACACGCACATAAAACCACCACCACCAGGCTT  
GCTGAGAACAAGTCAAATGTGCCACCAAACCATCGTCTTAGTGGGAGATGGGGTGGC  
ACTGCAGGGGCAGAAAGACTGACGT

>1754

CACGCACATAAAACCACCACCACCAGGCTTGCTGAGAACAAGTCAAATGTGCCACCAA  
ACCATCGTCTTAGTGGGAGATGGGGTGGCACTGCAGGGGCAGAAAGACTGACGTCTG  
ATGGACTTGGGTTTGAATACTAGTGC

>1755

AGGCTTGCTGAGAACAAGTCAAATGTGCCACCAAACCATCGTCTTAGTGGGAGATGGG

GTGGCACTGCAGGGGCAGAAAGACTGACGTCTGATGGACTTGGGTTGAATACTAGTG  
CTCCATGGTGAATTTGGGCAAATG

>1756

GCTGAGAACAAGTCAAATGTGCCACCAAACCATCGTCTTAGTGGGAGATGGGGTGGC  
ACTGCAGGGGCAGAAAGACTGACGTCTGATGGACTTGGGTTGAATACTAGTGCTCCA  
TGGTGAATTTGGGCAAATGACTTCA

>1757

AGAACAAGTCAAATGTGCCACCAAACCATCGTCTTAGTGGGAGATGGGGTGGCACTGC  
AGGGGCAGAAAGACTGACGTCTGATGGACTTGGGTTGAATACTAGTGCTCCATGGTG  
AATTTGGGCAAATGACTTCACCTC

>1758

TAGTGGGAGATGGGGTGGCACTGCAGGGGCAGAAAGACTGACGTCTGATGGACTTGG  
GTTTGAATACTAGTGCTCCATGGTGAATTTGGGCAAATGACTTCACCTCTGTGAAGCAG  
CAGTATCCTCTTCTGTGAAGTGAG

>1759

TCTGATGGACTTGGGTTTGAATACTAGTGCTCCATGGTGAATTTGGGCAAATGACTTCA  
CCTCTGTGAAGCAGCAGTATCCTCTTCTGTGAAGTGAGGTTAGCCCCTACCTCTCAATG  
TGGTTTTTAAAGTATGTTAATG

>1760

GATGGACTTGGGTTTGAATACTAGTGCTCCATGGTGAATTTGGGCAAATGACTTCACCT  
CTGTGAAGCAGCAGTATCCTCTTCTGTGAAGTGAGGTTAGCCCCTACCTCTCAATGTGG  
TTTTTAAAGTATGTTAATGAGA

>1761

CATGGTGAATTTGGGCAAATGACTTCACCTCTGTGAAGCAGCAGTATCCTCTTCTGTGA  
AGTGAGGTTAGCCCCTACCTCTCAATGTGGTTTTTAAAGTATGTTAATGAGATCACTTGT  
AACCTAAAGCACACAGAGTGT

>1762

CTCTGTGAAGCAGCAGTATCCTCTTCTGTGAAGTGAGGTTAGCCCCTACCTCTCAATGT  
GGTTTTTAAAGTATGTTAATGAGATCACTTGTAAACCTAAAGCACACAGAGTGTGAGGCC  
ACCTCCCTACTTCTGCTTCTC

>1763

GCAGTATCCTCTTCTGTGAAGTGAGGTTAGCCCCTACCTCTCAATGTGGTTTTTAAAGTA  
TGTTAATGAGATCACTTGTAAACCTAAAGCACACAGAGTGTGAGGCCACCTCCCTACTTC  
CTGCTTCTCTCATGACCCCAG

>1764

GTTAGCCCCTACCTCTCAATGTGGTTTTTAAAGTATGTTAATGAGATCACTTGTAAACCTA  
AAGCACACAGAGTGTGAGGCCACCTCCCTACTTCTGCTTCTCTCATGACCCCAGCCT  
GACAAGGGAGCCGCTGAGCCCC

>1765

TAGCCCCTACCTCTCAATGTGGTTTTTAAAGTATGTTAATGAGATCACTTGTAAACCTAAA  
GCACACAGAGTGTGAGGCCACCTCCCTACTTCTGCTTCTCTCATGACCCCAGCCTGA  
CAAGGGAGCCGCTGAGCCCCCT

>1766

CTACCTCTCAATGTGGTTTTTAAAGTATGTTAATGAGATCACTTGTAAACCTAAAGCACAC  
AGAGTGTGAGGCCACCTCCCTACTTCTGCTTCTCTCATGACCCCAGCCTGACAAGGG  
AGCCGCTGAGCCCCCTGCCACC

>1767

ATCACTTGTAACCTAAAGCACACAGAGTGTGAGGCCACCTCCCTACTTCCTGCTTCTCT  
CATGACCCCAGCCTGACAAGGGAGCCGCTGAGCCCCCTGCCACCCTACCCGGCGTT  
GTGCTCTAAGTGGATTAGCTCAGC

>1768

TAAAGCACACAGAGTGTGAGGCCACCTCCCTACTTCCTGCTTCTCTCATGACCCCAGC  
CTGACAAGGGAGCCGCTGAGCCCCCTGCCACCCTACCCGGCGTTGTGCTCTAAGTGG  
ATTAGCTCAGCGTTGTGATCTTAA

>1769

ACAGAGTGTGAGGCCACCTCCCTACTTCCTGCTTCTCTCATGACCCCAGCCTGACAAG  
GGAGCCGCTGAGCCCCCTGCCACCCTACCCGGCGTTGTGCTCTAAGTGGATTAGCTC  
AGCGTTGTGATCTTAATGCCATTA

>1770

TCTCATGACCCCAGCCTGACAAGGGAGCCGCTGAGCCCCCTGCCACCCTACCCGGCG  
TTGTGCTCTAAGTGGATTAGCTCAGCGTTGTGATCTTAATGCCATTAGGCCTGTTGGCA  
CGGCTCTCCTTGCCATAGTGAGA

>1771

GCCTGACAAGGGAGCCGCTGAGCCCCCTGCCACCCTACCCGGCGTTGTGCTCTAAGT  
GGATTAGCTCAGCGTTGTGATCTTAATGCCATTAGGCCTGTTGGCACGGCTCTCCTTGC  
CATAGTGAGAAGCAGATGTGGCC

>1772

CCCCTGCCACCCTACCCGGCGTTGTGCTCTAAGTGGATTAGCTCAGCGTTGTGATCTT  
AATGCCATTAGGCCTGTTGGCACGGCTCTCCTTGCCATAGTGAGAAGCAGATGTGGCC  
GACCATAATGGCCCTTAGCGTGA

>1773

CTAAGTGGATTAGCTCAGCGTTGTGATCTTAATGCCATTAGGCCTGTTGGCACGGCTCT  
CCTTGCCATAGTGAGAAGCAGATGTGGCCGACCATAATGGCCCTTAGCGTGATCCATCG  
GGCCACAGTGCTGGGGCAACC

>1774

ATTAGGCCTGTTGGCACGGCTCTCCTTGCCATAGTGAGAAGCAGATGTGGCCGACCATA  
ATGGCCCTTAGCGTGATCCATCGGGCCACAGTGCTGGGGCAACCATTATTAGTGTTAA  
TTTGGGGGAGCTTTTTATGGTA

>1775

CTCCTTGCCATAGTGAGAAGCAGATGTGGCCGACCATAATGGCCCTTAGCGTGATCCAT  
CGGGCCACAGTGCTGGGGCAACCATTATTAGTGTTAATTTGGGGGAGCTTTTTATGGT  
AGCTGGGGGAAATGTGGAGGGA

>1776

AGATGTGGCCGACCATAATGGCCCTTAGCGTGATCCATCGGGCCACAGTGCTGGGGC  
AACCATTATTAGTGTTAATTTGGGGGAGCTTTTTATGGTAGCTGGGGGAAATGTGGAGG  
GATTGTTGAAATTTATTTAAGC

>1777

AATGGCCCTTAGCGTGATCCATCGGGCCACAGTGCTGGGGCAACCATTATTAGTGTTA  
ATTTGGGGGAGCTTTTTATGGTAGCTGGGGGAAATGTGGAGGGATTGTTGAAATTTAT  
TTAAGCTGTTACAGAGGTTAGG

>1778

GTGATCCATCGGGCCACAGTGCTGGGGCAACCATTATTAGTGTTAATTTGGGGGAGCT

TTTTATGGTAGCTGGGGGAAATGTGGAGGGATTGTTGGAAATTTATTTAAGCTGTTCAG  
CAGGTTAGGTGCTGCTGGGGTC

>1779

GTGTTAATTTGGGGGAGCTTTTTATGGTAGCTGGGGGAAATGTGGAGGGATTGTTGGA  
AATTTATTTAAGCTGTTCAGCAGGTTAGGTGCTGCTGGGGTCTACTATGGCAAACCT  
CAGCTCCCCAACCCATCTCTTT

>1780

TTGGGGGAGCTTTTTATGGTAGCTGGGGGAAATGTGGAGGGATTGTTGGAAATTTATTT  
AAGCTGTTCAGCAGGTTAGGTGCTGCTGGGGTCTACTATGGCAAACCTCAGCTCCC  
CCAACCCATCTCTTTAAGGAACG

>1781

TTGTTGGAAATTTATTTAAGCTGTTCAGCAGGTTAGGTGCTGCTGGGGTCTACTATGGC  
AAAACCTCAGCTCCCCAACCCATCTCTTTAAGGAACGTCCCTCCCCAACACCGAAG  
CCCAGGCCTGATTACTTCCAGAG

>1782

TTCAGCAGGTTAGGTGCTGCTGGGGTCTACTATGGCAAACCTCAGCTCCCCAACC  
CATCTCTTTAAGGAACGTCCCTCCCCAACACCGAAGCCCAGGCCTGATTACTTCCAGA  
GTTGGAGAGACAACCTTAGCAGGCT

>1783

GTCTACTATGGCAAACCTCAGCTCCCCAACCCATCTCTTTAAGGAACGTCCCTCCC  
CAACACCGAAGCCCAGGCCTGATTACTTCCAGAGTTGGAGAGACAACCTTAGCAGGCT  
CTTGTTTCTTGCCGATGTACCTTA

>1784

AGCTCCCCAACCATCTCTTTAAGGAACGTCCCTCCCCAACACCGAAGCCCAGGCCT  
GATTACTTCCAGAGTTGGAGAGACAACCTTAGCAGGCTCTTGTTTCTTGCCGATGTACCT  
TATTAGTAGCACCTGGCATCATA

>1785

CTCCCCAACCATCTCTTTAAGGAACGTCCCTCCCCAACACCGAAGCCCAGGCCTGA  
TTACTTCCAGAGTTGGAGAGACAACCTTAGCAGGCTCTTGTTTCTTGCCGATGTACCTTA  
TTAGTAGCACCTGGCATCATAAC

>1786

TTTAAGGAACGTCCCTCCCCAACACCGAAGCCCAGGCCTGATTACTTCCAGAGTTGGA  
GAGACAACCTTAGCAGGCTCTTGTTTCTTGCCGATGTACCTTATTAGTAGCACCTGGCAT  
CATAACCCACTAATGGGAACCAG

>1787

GGCCTGATTACTTCCAGAGTTGGAGAGACAACCTTAGCAGGCTCTTGTTTCTTGCCGATG  
TACCTTATTAGTAGCACCTGGCATCATAACCCACTAATGGGAACCAGTGCTCTCCTCCT  
GCGTGGCCAGTGACAAGTAGCC

>1788

CTGATTACTTCCAGAGTTGGAGAGACAACCTTAGCAGGCTCTTGTTTCTTGCCGATGTAC  
CTTATTAGTAGCACCTGGCATCATAACCCACTAATGGGAACCAGTGCTCTCCTCCTGCG  
TGGCCAGTGACAAGTAGCCCTG

>1789

CAGGCTCTTGTTTCTTGCCGATGTACCTTATTAGTAGCACCTGGCATCATAACCCACTAA  
TGGGAACCAGTGCTCTCCTCCTGCGTGGCCAGTGACAAGTAGCCCTGTCAGCCGGAGC  
TCGCCGTGCGAGGAAGTTCCTA

>1790

GTACCTTATTAGTAGCACCTGGCATCATAACCCACTAATGGGAACCAGTGCTCTCCTCC  
TGCGTGGCCAGTGACAAGTAGCCCTGTCAGCCGGAGCTCGCCGTGCGAGGAAGTTCC  
TATTAGCTTTATGGTCAGGAGAAC

>1791

ATTAGTAGCACCTGGCATCATAACCCACTAATGGGAACCAGTGCTCTCCTCCTGCGTGG  
CCAGTGACAAGTAGCCCTGTCAGCCGGAGCTCGCCGTGCGAGGAAGTTCCTATTAGCT  
TTATGGTCAGGAGAACTTGTCTT

>1792

TGGCATCATAACCCACTAATGGGAACCAGTGCTCTCCTCCTGCGTGGCCAGTGACAAG  
TAGCCCTGTCAGCCGGAGCTCGCCGTGCGAGGAAGTTCCTATTAGCTTTATGGTCAGG  
AGAACTTGTCTGTTTCAGGAAATG

>1793

TGGGAACCAGTGCTCTCCTCCTGCGTGGCCAGTGACAAGTAGCCCTGTCAGCCGGAGC  
TCGCCGTGCGAGGAAGTTCCTATTAGCTTTATGGTCAGGAGAACTTGTCTGTTTCAGGA  
AATGAATGTTGCCGCTAAAGGTC

>1794

GGCCAGTGACAAGTAGCCCTGTCAGCCGGAGCTCGCCGTGCGAGGAAGTTCCTATTAG  
CTTTATGGTCAGGAGAACTTGTCTGTTTCAGGAAATGAATGTTGCCGCTAAAGGTCCG  
CGGCCCTGACCCTGGCGGCATAAC

>1795

CAGTGACAAGTAGCCCTGTCAGCCGGAGCTCGCCGTGCGAGGAAGTTCCTATTAGCTT  
TATGGTCAGGAGAACTTGTCTGTTTCAGGAAATGAATGTTGCCGCTAAAGGTCCGCGG  
CCCTGACCCTGGCGGCATAACCTG

>1796

TGTCAGCCGGAGCTCGCCGTGCGAGGAAGTTCCTATTAGCTTTATGGTCAGGAGAACT  
TGTCTGTTTCAGGAAATGAATGTTGCCGCTAAAGGTCCGCGGCCCTGACCCTGGCGGC  
ATAACCTGTGCGGGCCGGGGAGAC

>1797

GAGGAAGTTCCTATTAGCTTTATGGTCAGGAGAACTTGTCTGTTTCAGGAAATGAATGT  
TGCCGCTAAAGGTCCGCGGCCCTGACCCTGGCGGCATAACCTGTGCGGGCCGGGGAG  
ACCCTGTGCAGGATGCTTGGGATT

>1798

AGGAAATGAATGTTGCCGCTAAAGGTCCGCGGCCCTGACCCTGGCGGCATAACCTGTG  
CGGGCCGGGGAGACCCTGTGCAGGATGCTTGGGATTCAGCCCCTCTCTGGTTCTTGT  
CATATGTAAAGAGGGAATCATTGT

>1799

GTTGCCGCTAAAGGTCCGCGGCCCTGACCCTGGCGGCATAACCTGTGCGGGCCGGGG  
AGACCCTGTGCAGGATGCTTGGGATTCAGCCCCTCTCTGGTTCTTGTATATGTAAAG  
AGGGAATCATTGTGGTATGTTGCA

>1800

GCGGCCCTGACCCTGGCGGCATAACCTGTGCGGGCCGGGGAGACCCTGTGCAGGATG  
CTTGGGATTCAGCCCCTCTCTGGTTCTTGTATATGTAAAGAGGGAATCATTGTGGTAT  
GTTGCAGCCTTGAACCTTTGATT

>1801

GCGGGCCGGGGAGACCCTGTGCAGGATGCTTGGGATTCAGCCCCTCTCTGGTTCTTG

TCATATGTAAAGAGGGAATCATTGTGGTATGTTGCAGCCTTGAACCTTTGATTTATGCAG  
TGAGGGCGACTTAACCGTTTCC

>1802

ATGCTTGGGATTTAGCCCCCTCTCTGGTTCTTGTGCATATGTAAAGAGGGAATCATTGTG  
GTATGTTGCAGCCTTGAACCTTTGATTTATGCAGTGAGGGCGACTTAACCGTTTCCATG  
CCTGGACGGCTGTGCAGTGACA

>1803

CTGGTCTTGTGCATATGTAAAGAGGGAATCATTGTGGTATGTTGCAGCCTTGAACCTTTG  
ATTTATGCAGTGAGGGCGACTTAACCGTTTCCATGCCTGGACGGCTGTGCAGTGACAG  
AGCCGTGTTGTGAGCGTATGTG

>1804

TTCTTGTGCATATGTAAAGAGGGAATCATTGTGGTATGTTGCAGCCTTGAACCTTTGATTT  
ATGCAGTGAGGGCGACTTAACCGTTTCCATGCCTGGACGGCTGTGCAGTGACAGAGCC  
GTGTTGTGAGCGTATGTGCCTA

>1805

TGCAGCCTTGAACCTTTGATTTATGCAGTGAGGGCGACTTAACCGTTTCCATGCCTGGA  
CGGCTGTGCAGTGACAGAGCCGTGTTGTGAGCGTATGTGCCTAGGTACATGTGTGTGT  
GGGGTGGTCAAGGGGAAGGAGAG

>1806

CTTGAACCTTTGATTTATGCAGTGAGGGCGACTTAACCGTTTCCATGCCTGGACGGCTG  
TGCAGTGACAGAGCCGTGTTGTGAGCGTATGTGCCTAGGTACATGTGTGTGTGGGGTG  
GTCAAGGGGAAGGAGAGACCCCC

>1807

TTATGCAGTGAGGGCGACTTAACCGTTTCCATGCCTGGACGGCTGTGCAGTGACAGAG  
CCGTGTTGTGAGCGTATGTGCCTAGGTACATGTGTGTGTGGGGTGGTCAAGGGGAAGG  
AGAGACCCCCACGTGCTAGCAGGG

>1808

GCGACTTAACCGTTTCCATGCCTGGACGGCTGTGCAGTGACAGAGCCGTGTTGTGAGC  
GTATGTGCCTAGGTACATGTGTGTGTGGGGTGGTCAAGGGGAAGGAGAGACCCCCACG  
TGCTAGCAGGGGCTGTTGCTGGGA

>1809

CGGCTGTGCAGTGACAGAGCCGTGTTGTGAGCGTATGTGCCTAGGTACATGTGTGTGT  
GGGGTGGTCAAGGGGAAGGAGAGACCCCCACGTGCTAGCAGGGGCTGTTGCTGGGA  
GCGGGTGGATTCATGGGAGGATTCC

>1810

TGCAGTGACAGAGCCGTGTTGTGAGCGTATGTGCCTAGGTACATGTGTGTGTGGGGTG  
GTCAAGGGGAAGGAGAGACCCCCACGTGCTAGCAGGGGCTGTTGCTGGGAGCGGGTG  
GATTCATGGGAGGATTCTTTTCT

>1811

AGTGACAGAGCCGTGTTGTGAGCGTATGTGCCTAGGTACATGTGTGTGTGGGGTGGTC  
AAGGGGAAGGAGAGACCCCCACGTGCTAGCAGGGGCTGTTGCTGGGAGCGGGTGGAT  
TTCATGGGAGGATTCTTTTCTTTT

>1812

GTGAGCGTATGTGCCTAGGTACATGTGTGTGTGGGGTGGTCAAGGGGAAGGAGAGAC  
CCCCACGTGCTAGCAGGGGCTGTTGCTGGGAGCGGGTGGATTCATGGGAGGATTCTCT  
TTCTTTTTTCTTTTCTTGCATTCT



>1813

GTCAAGGGGAAGGAGAGACCCACGTGCTAGCAGGGGCTGTTGCTGGGAGCGGGTG  
GATTCATGGGAGGATTCTTTCTTTTTCTTTTTCTTGCATTCTTGCAGCATCTAAATT  
TCCTGCGATTGTTGGCTGCAA

>1814

CTGTTGCTGGGAGCGGGTGGATTTCATGGGAGGATTCTTTCTTTTTCTTTTTCTTGC  
ATTCTTGCAGCATCTAAATTTCTGCGATTGTTGGCTGCAAAGTGGTAAGAAGCTGGAG  
AGCATTGTGTCTGGAATTGAA

>1815

ATTCCTTTCTTTTTCTTTTTCTTGCATTCTTGCAGCATCTAAATTTCTGCGATTGTTG  
GCTGCAAAGTGGTAAGAAGCTGGAGAGCATTGTGTCTGGAATTGAACCTGGGTTCGAA  
TTAATCTTCTGTCTCTTAGAG

>1816

TTCTTTTTCTTTTTCTTGCATTCTTGCAGCATCTAAATTTCTGCGATTGTTGGCTGCAA  
AGTGGTAAGAAGCTGGAGAGCATTGTGTCTGGAATTGAACCTGGGTTCGAATTAATCT  
TCTGTCTCTTAGAGGCTGTGT

>1817

AGTGGTAAGAAGCTGGAGAGCATTGTGTCTGGAATTGAACCTGGGTTCGAATTAATCT  
TCTGTCTCTTAGAGGCTGTGTGACCGTGGCAAGATTCTCACCCTCACTTCCTCATCT  
GTGAGATGAAGTTAATAACTTCT

>1818

TGGTAAGAAGCTGGAGAGCATTGTGTCTGGAATTGAACCTGGGTTCGAATTAATCTTCT  
GTCTCTTAGAGGCTGTGTGACCGTGGCAAGATTCTCACCCTCACTTCCTCATCTGTG  
AGATGAAGTTAATAACTTCTGA

>1819

TAATCTTCTGTCTCTTAGAGGCTGTGTGACCGTGGCAAGATTCTCACCCTCACTTC  
TCATCTGTGAGATGAAGTTAATAACTTCTGATTCACTGGTGGTAGAGCAGTGTGTTA  
AGTAGGTGATGTATAGAGAAT

>1820

TCTGTCTCTTAGAGGCTGTGTGACCGTGGCAAGATTCTCACCCTCACTTCCTCATCT  
GTGAGATGAAGTTAATAACTTCTGATTCACTGGTGGTAGAGCAGTGTGTTAAGTAG  
GTGATGTATAGAGAATACATGG

>1821

AAGATTCCTCACCCTCACTTCCTCATCTGTGAGATGAAGTTAATAACTTCTGATTCATA  
CTGGTGGTAGAGCAGTGTGTTAAGTAGGTGATGTATAGAGAATACATGGCCAGCGTC  
CGCCAGTGGTGTGGCCTCAG

>1822

TCACTTCCTCATCTGTGAGATGAAGTTAATAACTTCTGATTCACTGGTGGTAGAGCA  
GTGTTGTTAAGTAGGTGATGTATAGAGAATACATGGCCAGCGTCCGGCCAGTGGTGTG  
GCCTCAGGTTGTATACTTGA

>1823

CTTCTCATCTGTGAGATGAAGTTAATAACTTCTGATTCACTGGTGGTAGAGCAGTG  
TTGTTAAGTAGGTGATGTATAGAGAATACATGGCCAGCGTCCGGCCAGTGGTGTGGCC  
TCAGGTTGTATACTTGAAGGA

>1824

GTGAGATGAAGTTAATAACTTCTGATTCACTGGTGGTAGAGCAGTGTGTTAAGTAG

GTGATGTATAGAGAATACATGGCCCAGCGTCCGGCCAGTGGTGTGGCCTCAGGTTGTAT  
ACTTGAAAGGATGTGTATACTT

>1825

CATACTGGTGGTAGAGCAGTGTTGTTAAGTAGGTGATGTATAGAGAATACATGGCCCAG  
CGTCCGGCCAGTGGTGTGGCCTCAGGTTGTATACTTGAAAGGATGTGTATACTTCAGTA  
TTTTTTCCATTGTAAAATTAAG

>1826

AGCAGTGTGTTAAGTAGGTGATGTATAGAGAATACATGGCCCAGCGTCCGGCCAGTG  
GTGTGGCCTCAGGTTGTATACTTGAAAGGATGTGTATACTTCAGTATTTTTTCCATTGTA  
AAATTAAGGGTTTTTTTTCTTT

>1827

AGGTGATGTATAGAGAATACATGGCCCAGCGTCCGGCCAGTGGTGTGGCCTCAGGTTG  
TATACTTGAAAGGATGTGTATACTTCAGTATTTTTTCCATTGTAAAATTAAGGGTTTTTTT  
TCTTTTTTCTTGAGACAGAG

>1828

ATACATGGCCCAGCGTCCGGCCAGTGGTGTGGCCTCAGGTTGTATACTTGAAAGGATGT  
GTATACTTCAGTATTTTTTCCATTGTAAAATTAAGGGTTTTTTTTCTTTTTTCTTGAGAC  
AGAGTCCTACTTTGTTGCC

>1829

TGGTGTGGCCTCAGGTTGTATACTTGAAAGGATGTGTATACTTCAGTATTTTTTCCATTG  
TAAAATTAAGGGTTTTTTTTCTTTTTTCTTGAGACAGAGTCTACTTTGTTGCCAGGC  
TTGAGTGCAGTGGCGCGATC

>1830

TGAAAGGATGTGTATACTTCAGTATTTTTTCCATTGTAAAATTAAGGGTTTTTTTTCTTTT  
TTTCTTGAGACAGAGTCTACTTTGTTGCCAGGCTTGAGTGCAGTGGCGCGATCTCA  
GCTCACTGCAACTTCCGCCTC

>1831

AGGATGTGTATACTTCAGTATTTTTTCCATTGTAAAATTAAGGGTTTTTTTTCTTTTTTCT  
TTGAGACAGAGTCTACTTTGTTGCCAGGCTTGAGTGCAGTGGCGCGATCTCAGCTC  
ACTGCAACTTCCGCCTCCTGG

>1832

CATTGTAAAATTAAGGGTTTTTTTTCTTTTTTCTTGAGACAGAGTCTACTTTGTTGCC  
CAGGCTTGAGTGCAGTGGCGCGATCTCAGCTCACTGCAACTTCCGCCTCCTGGGTCCA  
AGTGATTCTCGTGCCTCAGCCT

>1833

TTTTTTCTTTTTTCTTGAGACAGAGTCTACTTTGTTGCCAGGCTTGAGTGCAGTGG  
CGCGATCTCAGCTCACTGCAACTTCCGCCTCCTGGGTCCAAGTGATTCTCGTGCCTCAG  
CCTCCCAAGTACCTGGGACCAC

>1834

CTTTGTTGCCAGGCTTGAGTGCAGTGGCGCGATCTCAGCTCACTGCAACTTCCGCCT  
CCTGGGTCCAAGTGATTCTCGTGCCTCAGCCTCCCAAGTACCTGGGACCACAGGGGTG  
CACCACCACCTGGCTAATTTTT

>1835

GAGTGCAGTGGCGCGATCTCAGCTCACTGCAACTTCCGCCTCCTGGGTCCAAGTGATT  
CTCGTGCCTCAGCCTCCCAAGTACCTGGGACCACAGGGGTGCACCACCACACCTGGCT  
AATTTTTGTATATATATATATA

>1836

GGCGGATCTCAGCTCACTGCAACTCCGCCTCTGGGTCCAAGTGATTCTCGTGCCTC  
AGCCTCCAAGTACCTGGGACCACAGGGGTGCACCACCACACCTGGCTAATTTTTGTA  
TATATATATATATATATATTTAG

>1837

CACTGCAACTTCCGCCTCTGGGTCCAAGTGATTCTCGTGCCTCAGCCTCCAAGTACC  
TGGGACCACAGGGGTGCACCACCACACCTGGCTAATTTTTGTATATATATATATATATA  
TTTAGTAGAGATGGGGTTTC

>1838

TACCTGGGACCACAGGGGTGCACCACCACACCTGGCTAATTTTTGTATATATATATATA  
TATATTTAGTAGAGATGGGGTTTCGCCATGTTGGCCAGGCTGGTCTTGAACCTCCCGACC  
TCAGGTGATCTGCCTGTCTC

>1839

CTGGGACCACAGGGGTGCACCACCACACCTGGCTAATTTTTGTATATATATATATATAT  
ATTTAGTAGAGATGGGGTTTCGCCATGTTGGCCAGGCTGGTCTTGAACCTCCCGACCTCA  
GGTGATCTGCCTGTCTCAGC

>1840

ACCTGGCTAATTTTTGTATATATATATATATATATTTAGTAGAGATGGGGTTTCGCCATG  
TTGGCCAGGCTGGTCTTGAACCTCCCGACCTCAGGTGATCTGCCTGTCTCAGCCTCCTAA  
AGTGCTGGGATTATAGGTG

>1841

ATATATATATATTTAGTAGAGATGGGGTTTCGCCATGTTGGCCAGGCTGGTCTTGAACCT  
CCGACCTCAGGTGATCTGCCTGTCTCAGCCTCCTAAAGTGCTGGGATTATAGGTGTGAG  
CCTGCGCCTGGCCTAAGTT

>1842

GAGATGGGGTTTCGCCATGTTGGCCAGGCTGGTCTTGAACCTCCCGACCTCAGGTGATC  
TGCCTGTCTCAGCCTCCTAAAGTGCTGGGATTATAGGTGTGAGCCACTGCGCCTGGCCT  
AAGTTTTTAAAAATAAAAAGAA

>1843

CAGGCTGGTCTTGAACCTCCCGACCTCAGGTGATCTGCCTGTCTCAGCCTCCTAAAGTG  
CTGGGATTATAGGTGTGAGCCACTGCGCCTGGCCTAAGTTTTTAAAAATAAAAAGAAT  
GGCATAGTCTTTTTTGCTCTTT

>1844

GTCTTGAACCTCCCGACCTCAGGTGATCTGCCTGTCTCAGCCTCCTAAAGTGCTGGGATT  
ATAGGTGTGAGCCACTGCGCCTGGCCTAAGTTTTTAAAAATAAAAAGAATGGCATAGT  
GCTTTTTTGCTCTTTAACAGAT

>1845

AGGTGATCTGCCTGTCTCAGCCTCCTAAAGTGCTGGGATTATAGGTGTGAGCCACTGCG  
CCTGGCCTAAGTTTTTAAAAATAAAAAGAATGGCATAGTCTTTTTTGCTCTTTAACAG  
GATCAAGACCAAAGTTTTCCC

>1846

AGCCTCCTAAAGTGCTGGGATTATAGGTGTGAGCCACTGCGCCTGGCCTAAGTTTTTAA  
AAATAAAAAGAATGGCATAGTCTTTTTTGCTCTTTAACAGATCAAGACCAAAGTTT  
TCCCCCATCATAGCCAAAGT

>1847

AGCCACTGCGCCTGGCCTAAGTTTTTAAAAATAAAAAGAATGGCATAGTCTTTTTTG

CTCTTTAACAGATCAAGACCAAAGTTTTCCCCCATCATAGCCCAAAGTCCTAAAGA  
AAGGCTACTTAAGTTGTTTCGTTT

>1848

TGCGCCTGGCCTAAGTTTTTAAAAATTA AAAAGAATGGCATAGTGCTTTTTTGCTCTTTA  
ACAGATCAAGACCAAAGTTTTCCCCCATCATAGCCCAAAGTCCTAAAGAAAGGCTA  
CTTAAGTTGTTTCGTTTTCTTTT

>1849

TAAAAAGAATGGCATAGTGCTTTTTTGCTCTTTAACAGATCAAGACCAAAGTTTTCC  
CCCATCATAGCCCAAAGTCCTAAAGAAAGGCTACTTAAGTTGTTTCGTTTTCTTTTGT  
TCTCCCATGAGTAATGTTTCTA

>1850

GCTTTTTTGCTCTTTAACAGATCAAGACCAAAGTTTTCCCCCATCATAGCCCAAAGT  
CCTAAAGAAAGGCTACTTAAGTTGTTTCGTTTTCTTTTGTCTCCCATGAGTAATGTTT  
TAAGTGTGATTTTTGCAGAGA

>1851

TCTTTAACAGATCAAGACCAAAGTTTTCCCCCATCATAGCCCAAAGTCCTAAAGAA  
AGGCTACTTAAGTTGTTTCGTTTTCTTTGTTTCTCCCATGAGTAATGTTTCTAAGTGTGA  
TTTTGCAGAGAACAGCAGTGT

>1852

CCCCATCATAGCCCAAAGTCCTAAAGAAAGGCTACTTAAGTTGTTTCGTTTTCTTTTGT  
TCTCCCATGAGTAATGTTTCTAAGTGTGATTTTTGCAGAGAACAGCAGTGTCTGACCTC  
ATTCTTGAGGGGAACTTTTCTG

>1853

CAAAGTCCTAAAGAAAGGCTACTTAAGTTGTTTCGTTTTCTTTGTTTCTCCCATGAGTA  
ATGTTTCTAAGTGTGATTTTTGCAGAGAACAGCAGTGTCTGACCTCATTCTTGAGGGGA  
ACTTTTCTGCCTGCCTCTTCTT

>1854

AAGGCTACTTAAGTTGTTTCGTTTTCTTTTGTCTCCCATGAGTAATGTTTCTAAGTGTG  
ATTTTTGCAGAGAACAGCAGTGTCTGACCTCATTCTTGAGGGGAACTTTTCTGCCTGCC  
TCTTCTTGAGAAAAAATGTTT

>1855

GGCTACTTAAGTTGTTTCGTTTTCTTTTGTCTCCCATGAGTAATGTTTCTAAGTGTGAT  
TTTTGCAGAGAACAGCAGTGTCTGACCTCATTCTTGAGGGGAACTTTTCTGCCTGCCT  
CTTCTTGAGAAAAAATGTTTGT

>1856

TTTCTCCCATGAGTAATGTTTCTAAGTGTGATTTTTGCAGAGAACAGCAGTGTCTGACC  
TCATTCTTGAGGGGAACTTTTCTGCCTGCCTCTTCTTGAGAAAAAATGTTTGTGAGTTG  
TCTGGCAAATGGATGCGTACT

>1857

GATTTTTGCAGAGAACAGCAGTGTCTGACCTCATTCTTGAGGGGAACTTTTCTGCCTG  
CCTCTTCTTGAGAAAAAATGTTTGTGAGTTGTCTGGCAAATGGATGCGTACTTTTGTCT  
GCTGTTGCTGCCGCTGCCGTTTT

>1858

AGCAGTGTCTGACCTCATTCTTGAGGGGAACTTTTCTGCCTGCCTCTTCTTGAGAAAA  
AATGTTTGTGAGTTGTCTGGCAAATGGATGCGTACTTTTGTCTGCTGTTGCTGCCGCTG  
CCGTTTTAAAGGCCCTGGTGAC

>1859

AATGTTTGTGAGTTGTCTGGCAAATGGATGCGTTACTTTTGTGCTGTTGCTGCCGCTG  
CCGTTTTAAAGGCCCTGGTGACAAAGGAGTGAAGTGCACCTTCGGGGAAAGCATGC  
CGAATCTGGCCCAGAAAAGAGGG

>1860

CTGGCAAATGGATGCGTTACTTTTGTGCTGTTGCTGCCGCTGCCGTTTTAAAGGCCCC  
TGTTGACAAAGGAGTGAAGTGCACCTTCGGGGAAAGCATGCCGGAATCTGGCCCAGA  
AAAGAGGGGCCGCTGGGGGAAGGG

>1861

CTGCTGTTGCTGCCGCTGCCGTTTTAAAGGCCCTGGTGACAAAGGAGTGAAGTGCAC  
TTTCGGGGAAAGCATGCCGGAATCTGGCCCAGAAAAGAGGGGCCGCTGGGGGAAGG  
GTTTGGAGATGACGCCTCCTCAGGAA

>1862

GTTTTAAAGGCCCTGGTGACAAAGGAGTGAAGTGCACCTTCGGGGAAAGCATGCCG  
GAATCTGGCCCAGAAAAGAGGGGCCGCTGGGGGAAGGGTTTGGAGATGACGCCTCCT  
CAGGAACTTTAAAAGAAATCTGTCCA

>1863

AAAGGCCCTGGTGACAAAGGAGTGAAGTGCACCTTCGGGGAAAGCATGCCGGAATC  
TGCCCAGAAAAGAGGGGCCGCTGGGGGAAGGGTTTGGAGATGACGCCTCCTCAGGA  
ACTTTAAAAGAAATCTGTCCATCTGT

>1864

CTGCACTTCGGGGAAAGCATGCCGGAATCTGGCCCAGAAAAGAGGGGCCGCTGGGG  
GAAGGGTTTGGAGATGACGCCTCCTCAGGAACTTTAAAAGAAATCTGTCCATCTGTCT  
CTGGCATTATGGCATCGTTGACAG

>1865

AAGCATGCCGGAATCTGGCCCAGAAAAGAGGGGCCGCTGGGGGAAGGGTTTGGAGAT  
GACGCCTCCTCAGGAACTTTAAAAGAAATCTGTCCATCTGTCTCTGGCATTATGGCAT  
CGTTGACAGCAGTTCAAGGAAAAA

>1866

ATCTGGCCCAGAAAAGAGGGGCCGCTGGGGGAAGGGTTTGGAGATGACGCCTCCTCA  
GGAACCTTTAAAAGAAATCTGTCCATCTGTCTCTGGCATTATGGCATCGTTGACAGCAG  
TTCAAGGAAAAATAAAAATAAGTT

>1867

ATGACGCCTCCTCAGGAACTTTAAAAGAAATCTGTCCATCTGTCTCTGGCATTATGGC  
ATCGTTGACAGCAGTTCAAGGAAAAATAAAAATAAGTTCTTATCTGATTGCGGGGCTGA  
TTGCAAAGCCGAAGGACTAGAG

>1868

ACGCCTCCTCAGGAACTTTAAAAGAAATCTGTCCATCTGTCTCTGGCATTATGGCATC  
GTTGACAGCAGTTCAAGGAAAAATAAAAATAAGTTCTTATCTGATTGCGGGGCTGATTG  
CAAAGCCGAAGGACTAGAGTGG

>1869

CCTCAGGAACTTTAAAAGAAATCTGTCCATCTGTCTCTGGCATTATGGCATCGTTGAC  
AGCAGTTCAAGGAAAAATAAAAATAAGTTCTTATCTGATTGCGGGGCTGATTGCAAAG  
CCGAAGGACTAGAGTGGCCAGCG

>1870

AGAAATCTGTCCATCTGTCTCTGGCATTATGGCATCGTTGACAGCAGTTCAAGGAAAA

ATAAAAATAAGTTCTTATCTGATTGCGGGGCTGATTGCAAAGCCGAAGGACTAGAGTG  
GCCAGCGAGTCGGGCGGCTGGAT

>1871

GTTGACAGCAGTTCAAGGAAAAATAAAAATAAGTTCTTATCTGATTGCGGGGCTGATTG  
CAAAGCCGAAGGACTAGAGTGGCCAGCGAGTCGGGCGGCTGGATCTGGAGTTTTGGA  
GAAAGGGCCACTGGCTCATTCTG

>1872

AGCAGTTCAAGGAAAAATAAAAATAAGTTCTTATCTGATTGCGGGGCTGATTGCAAAG  
CCGAAGGACTAGAGTGGCCAGCGAGTCGGGCGGCTGGATCTGGAGTTTTGGAGAAAG  
GGCCACTGGCTCATTCTGGGCACG

>1873

AGGAAAAATAAAAATAAGTTCTTATCTGATTGCGGGGCTGATTGCAAAGCCGAAGGAC  
TAGAGTGGCCAGCGAGTCGGGCGGCTGGATCTGGAGTTTTGGAGAAAGGGCCACTGG  
CTCATTCTGGGCACGCACGCTCAC

>1874

TCTGATTGCGGGGCTGATTGCAAAGCCGAAGGACTAGAGTGGCCAGCGAGTCGGGCG  
GCTGGATCTGGAGTTTTGGAGAAAGGGCCACTGGCTCATTCTGGGCACGCACGCTCA  
CGGAGGCAAGTTCTCACCTCCTCGT

>1875

TCGGGCGGCTGGATCTGGAGTTTTGGAGAAAGGGCCACTGGCTCATTCTGGGCACGC  
ACGCTCACGGAGGCAAGTTCTCACCTCCTCGTGGGCTTCTCTTCACTTTACGTGGAAA  
AACTGTGTACGTCTCAAATTAATA

>1876

CGGCTGGATCTGGAGTTTTGGAGAAAGGGCCACTGGCTCATTCTGGGCACGCACGCT  
CACGGAGGCAAGTTCTCACCTCCTCGTGGGCTTCTCTTCACTTTACGTGGAAAACTG  
TGTACGTCTCAAATTAATAAGCAGC

>1877

CAAGTTCTCACCTCCTCGTGGGCTTCTCTTCACTTTACGTGGAAAACTGTGTACGTCT  
CAAATTAATAAGCAGCTCTTGCCCGCTTAGAGCCGGTGAAAGCTGCTTCGAAGGCGTT  
TG TAGAGTAGGGATTGAAAATGT

>1878

GTTCTCACCTCCTCGTGGGCTTCTCTTCACTTTACGTGGAAAACTGTGTACGTCTCAA  
ATTAATAAGCAGCTCTTGCCCGCTTAGAGCCGGTGAAAGCTGCTTCGAAGGCGTTTGT  
AGAGTAGGGATTGAAAATGTTCA

>1879

GGGCTTCTCTTCACTTTACGTGGAAAACTGTGTACGTCTCAAATTAATAAGCAGCTCTT  
GCCCCGCTTAGAGCCGGTGAAAGCTGCTTCGAAGGCGTTTGTAGAGTAGGGATTGGAA  
ATGTTCAATGCAAAGTTAAATC

>1880

GCTTCTCTTCACTTTACGTGGAAAACTGTGTACGTCTCAAATTAATAAGCAGCTCTTGC  
CCCGCTTAGAGCCGGTGAAAGCTGCTTCGAAGGCGTTTGTAGAGTAGGGATTGAAAAT  
GTTCAATGCAAAGTTAAATCGT

>1881

ACTTTACGTGGAAAACTGTGTACGTCTCAAATTAATAAGCAGCTCTTGCCCGCTTAG  
AGCCGGTGAAAGCTGCTTCGAAGGCGTTTGTAGAGTAGGGATTGAAAATGTTCAATGC  
AAAAGTTAAATCGTGACAGTTGTC

>1882

TACGTCTCAAATAAAAGCAGCTCTTGCCCCGCTTAGAGCCGGTGAAAGCTGCTTCGA  
AGGCGTTTGTAGAGTAGGGATTGGAAATGTTCAATGCAAAAGTTAAATCGTGACAGTT  
GTCCCCTAAATGATCTGCTAAATT

>1883

CGCTTAGAGCCGGTGAAAGCTGCTTCGAAGGCGTTTGTAGAGTAGGGATTGGAAATGT  
TCAATGCAAAAGTTAAATCGTGACAGTTGTCCCCTAAATGATCTGCTAAATTAAGGATC  
CGCTAACATTTGTGAGTCTACCT

>1884

GAAAGCTGCTTCGAAGGCGTTTGTAGAGTAGGGATTGGAAATGTTCAATGCAAAAGTT  
AAATCGTGACAGTTGTCCCCTAAATGATCTGCTAAATTAAGGATCCGCTAACATTTGTG  
AGTCTACCTCCCTGCATTCCCCC

>1885

AGGGATTGGAAATGTTCAATGCAAAAGTTAAATCGTGACAGTTGTCCCCTAAATGATCT  
GCTAAATTAAGGATCCGCTAACATTTGTGAGTCTACCTCCCTGCATTCCCCCACCCCC  
ACCCCCGCCCCCTTGGCAGAAG

>1886

GCAAAAGTTAAATCGTGACAGTTGTCCCCTAAATGATCTGCTAAATTAAGGATCCGCTA  
ACATTTGTGAGTCTACCTCCCTGCATTCCCCCACCCCCACCCCCGCCCCCTTGGCAGA  
AGGGATAAAGATGGTACCTAAA

>1887

AAGGATCCGCTAACATTTGTGAGTCTACCTCCCTGCATTCCCCCACCCCCACCCCCGC  
CCCCTTGGCAGAAGGGATAAAGATGGTACCTAAAAACAATGTGAAGCGGCTGCTAAAT  
CGAGTGACTCTAAAAACATTTTT

>1888

GATCCGCTAACATTTGTGAGTCTACCTCCCTGCATTCCCCCACCCCCACCCCCGCCCC  
CTTGGCAGAAGGGATAAAGATGGTACCTAAAAACAATGTGAAGCGGCTGCTAAATCGA  
GTGACTCTAAAAACATTTTTCTT

>1889

AACATTTGTGAGTCTACCTCCCTGCATTCCCCCACCCCCACCCCCGCCCCCTTGGCAG  
AAGGGATAAAGATGGTACCTAAAAACAATGTGAAGCGGCTGCTAAATCGAGTGACTCT  
AAAAACATTTTTCTTCTTGA

>1890

CATCCCCCACCCCCACCCCCGCCCCCTTGGCAGAAGGGATAAAGATGGTACCTAAA  
AACATGTGAAGCGGCTGCTAAATCGAGTGACTCTAAAAACATTTTTCTTCTTGAAG  
TTCAGTGTGAAAACCACTGG

>1891

ACCCCCGCCCCCTTGGCAGAAGGGATAAAGATGGTACCTAAAAACAATGTGAAGCGGC  
TGCTAAATCGAGTGACTCTAAAAACATTTTTCTTCTTGAAGTTCAGTGTGAAAACCA  
AGACTGGACTTGTGAGGATGCA

>1892

TGGTACCTAAAAACAATGTGAAGCGGCTGCTAAATCGAGTGACTCTAAAAACATTTTT  
CTTCTTGAAGTTCAGTGTGAAAACCACTGGACTTGTGAGGATGCAGACCTAT  
ATAGGGCCCATGTGCCTGGCCCCT

>1893

CCTAAAAACAATGTGAAGCGGCTGCTAAATCGAGTGACTCTAAAAACATTTTTCTTCC

TTGAAGTTCAGTGTGGAAAACCAGACTGGACTTGTGAGGGATGCAGACCTATATAGGG  
CCCATGTGCCTGGCCCCTTCTCT

>1894

AATCGAGTACTCTAAAAACATTTTTCTTCTTGAAGTTCAGTGTGGAAAACCAGAC  
TGGACTTGTGAGGGATGCAGACCTATATAGGGCCCATGTGCCTGGCCCCTTCTCTACT  
TTCTAGCACAAATGGTTTTTCATTG

>1895

ACATTTTTCTTCTTGAAGTTCAGTGTGGAAAACCAGACTGGACTTGTGAGGGATGC  
AGACCTATATAGGGCCCATGTGCCTGGCCCCTTCTCTACTTTCTAGCACAAATGGTTTTTC  
ATTGCCACCTCTCCCGCGCCTT

>1896

CAGACTGGACTTGTGAGGGATGCAGACCTATATAGGGCCCATGTGCCTGGCCCCTTCC  
TCACTTTCTAGCACAAATGGTTTTTCATTGCCACCTCTCCCGCGCCTTCCCCCCTTCATAA  
TTATCCACTATTTTACTTTCT

>1897

CATTGCCACCTCTCCCGCGCCTTCCCCCCTTCATAATTATCCACTATTTTACTTTCTGTG  
TCCTGACAGCTACAAGAGTAGTTTTTGTTTTTTTGAGCTGAGTAGCTGCTAAATATTCCC  
CAGCAGCCAGATTCAACGG

>1898

ACCTCTCCCGCGCCTTCCCCCCTTCATAATTATCCACTATTTTACTTTCTGTGCTCCTGAC  
AGCTACAAGAGTAGTTTTTGTTTTTTTGAGCTGAGTAGCTGCTAAATATTCCCAGCAG  
CCAGATTCAACGGCTGGGGG

>1899

CCTTCATAATTATCCACTATTTTACTTTCTGTGCTCCTGACAGCTACAAGAGTAGTTTTTGT  
TTTTTTGAGCTGAGTAGCTGCTAAATATTCCCAGCAGCCAGATTCAACGGCTGGGGGG  
GAGAATAGGCCAAACCTTGG

>1900

TTCTGTGCTCCTGACAGCTACAAGAGTAGTTTTTGTTTTTTTGAGCTGAGTAGCTGCTAA  
ATATTCCCAGCAGCCAGATTCAACGGCTGGGGGGGAGAATAGGCCAAACCTTGGCAT  
CCCCTGTTGAAAAGTGAAAAAT

>1901

TGTGCTCCTGACAGCTACAAGAGTAGTTTTTGTTTTTTTGAGCTGAGTAGCTGCTAAATA  
TTCCCAGCAGCCAGATTCAACGGCTGGGGGGGAGAATAGGCCAAACCTTGGCATCCC  
CTGTTGCAAAAAGTGAAAAATATT

>1902

TCCTGACAGCTACAAGAGTAGTTTTTGTTTTTTTGAGCTGAGTAGCTGCTAAATATTCCC  
CAGCAGCCAGATTCAACGGCTGGGGGGGAGAATAGGCCAAACCTTGGCATCCCCTGTT  
GCAAAAAGTGAAAAATATTCTG

>1903

GTTTTTGTTTTTTTGAGCTGAGTAGCTGCTAAATATTCCCAGCAGCCAGATTCAACGG  
CTGGGGGGGAGAATAGGCCAAACCTTGGCATCCCCTGTTGCAAAAAGTGAAAAATATT  
CTGTTGCAAAAAGTGAAAAATATT

>1904

TTCCCAGCAGCCAGATTCAACGGCTGGGGGGGAGAATAGGCCAAACCTTGGCATCCC  
CTGTTGCAAAAAGTGAAAAATATTCTGTTTGCAGTTAATTTAGTGGCAAGCAGATCAT  
GTTAACTGGATGTAATTGCTTCC



>1905

GGCTGGGGGGGAGAATAGGCCAAACCTTGGCATCCCCTGTTGCAAAAGTGAAAAATAT  
TTCTGTTTGCAGTTAATTTTAGTGGCAAGCAGATCATGTAACTGGATGTAATTGCTTCC  
AGATATGGCCGAGGGTTTTGTG

>1906

GAGAATAGGCCAAACCTTGGCATCCCCTGTTGCAAAAGTGAAAAATATTTCTGTTTGC  
AGTTAATTTTAGTGGCAAGCAGATCATGTAACTGGATGTAATTGCTTCCAGATATGGCC  
GAGGGTTTTGTGTGTTGAGATG

>1907

AAAAATATTTCTGTTTGCAGTTAATTTTAGTGGCAAGCAGATCATGTAACTGGATGTAA  
TTGCTTCCAGATATGGCCGAGGGTTTTGTGTGTTGAGATGAAGGGTCTGGTAAGTGCTT  
ACTTCCTGTGTAAATTAGCCT

>1908

TGTTTGCAGTTAATTTTAGTGGCAAGCAGATCATGTAACTGGATGTAATTGCTTCCAGA  
TATGGCCGAGGGTTTTGTGTGTTGAGATGAAGGGTCTGGTAAGTGCTTACTTCCTGTGT  
AAATTAGCCTATTCCATTAG

>1909

TAGTGGCAAGCAGATCATGTAACTGGATGTAATTGCTTCCAGATATGGCCGAGGGTTT  
TGTTGTTGAGATGAAGGGTCTGGTAAGTGCTTACTTCCTGTGTAAATTAGCCTATTCCA  
TTCAGTCTTTCATTCTGGCCA

>1910

CAGATATGGCCGAGGGTTTTGTGTGTTGAGATGAAGGGTCTGGTAAGTGCTTACTTCCT  
GTGTAAATTAGCCTATTCCATTAGTCTTTCATTCTGGCCAGCCCTGGATTCTGTCATTC  
TGCTCCCATTTCCCTCC

>1911

GGTTTTGTGTGTTGAGATGAAGGGTCTGGTAAGTGCTTACTTCCTGTGTAAATTAGCCT  
ATTCCATTAGTCTTTCATTCTGGCCAGCCCTGGATTCTGTCATTCTGCTCCCATTTTCC  
CCCTCCCAGCCTGCAGCCTG

>1912

ATTCCATTAGTCTTTCATTCTGGCCAGCCCTGGATTCTGTCATTCTGCTCCCATTTTCC  
CCCTCCCAGCCTGCAGCCTGGTGTGAGAAGCCGCTTGCTATGTTCTTAAGTGAAT  
TCTTTTGTCACTTGGAGCCAC

>1913

TCAGTCTTTCATTCTGGCCAGCCCTGGATTCTGTCATTCTGCTCCCATTTTCCCTCC  
CAGCCTGCAGCCTGGTGTGAGAAGCCGCTTGCTATGTTCTTAAGTGAATCTTTTG  
TCACTTGGAGCCACTCTCCTC

>1914

TTCTGCTCCCATTTTCCCTCCCTCCAGCCTGCAGCCTGGTGTGAGAAGCCGCTTGCTAT  
GTTCTTAAGTGAATCTTTTGTCACTTGGAGCCACTCTCCTCTTGTTCTTGATGTG  
AGTTTGCCTTAAATAATGAG

>1915

CCAGCCTGCAGCCTGGTGTGAGAAGCCGCTTGCTATGTTCTTAAGTGAATCTTTT  
GTCATTGGAGCCACTCTCCTCTTGTTCTTGATGTGAGTTTGCCTTAAATAATGAGA  
AGGGTTTAAAAGATGCCACCT

>1916

CTTGCTATGTTCTTAAGTGAATCTTTTGTCACTTGGAGCCACTCTCCTCTTGTTT

TTGATGTGAGTTTGGCCCTAAATAATGAGAAGGGTTTGAAAAGATGCCACCTGGACCC  
CAGGCCACCTCCCGCCTCTTTC

>1917

TGTAATCTTTTGTCACTTGGAGCCACTCTCCTCTTGGTTCTTGATGTGAGTTTGGCCCTT  
AAATAATGAGAAGGGTTTGAAAAGATGCCACCTGGACCCAGGCCACCTCCCGCCTCT  
TTCCCAGCAAAGGCAGATCTGA

>1918

CACTTGGAGCCACTCTCCTCTTGGTTCTTGATGTGAGTTTGGCCCTAAATAATGAGAAG  
GGTTTGAAAAGATGCCACCTGGACCCAGGCCACCTCCCGCCTCTTTCCCAGCAAAGG  
CAGATCTGAAGAGCATCTCCTGG

>1919

CCCTAAATAATGAGAAGGGTTTGAAAAGATGCCACCTGGACCCAGGCCACCTCCCG  
CCTCTTTCCCAGCAAAGGCAGATCTGAAGAGCATCTCCTGGTCATGGGGGTTGCATCTT  
GGAACCCAGAACTCCTTGTCTTTC

>1920

AAATAATGAGAAGGGTTTGAAAAGATGCCACCTGGACCCAGGCCACCTCCCGCCTCT  
TTCCCAGCAAAGGCAGATCTGAAGAGCATCTCCTGGTCATGGGGGTTGCATCTTGAA  
CCCAGAACTCCTTGTCTTCTATGC

>1921

CGCCTCTTTCCCAGCAAAGGCAGATCTGAAGAGCATCTCCTGGTCATGGGGGTTGCAT  
CTTGAAACCCAGAACTCCTTGTCTTCTATGCATTTTTTTTTTCTACTGCCCTCTGACCC  
CGACTCTCACCTGGGAGAACAC

>1922

CCCAGAACTCCTTGTCTTCTATGCATTTTTTTTTTCTACTGCCCTCTGACCCCGACTCT  
CACCTGGGAGAACACCTTCTCTTCTCAATTAGCCGACTCCTCCTCAGCCTGAACT  
AAGCACGTTCCAGTGGGTCCG

>1923

TTTTTTTTTCTACTGCCCTCTGACCCCGACTCTCACCTGGGAGAACACCTTCTCTTTC  
TCTCAATTAGTCCGACTCCTCCTCAGCCTGAACTAAGCACGTTCCAGTGGGTCCGAAAT  
CTCAGAAAAAATGAAACGGCT

>1924

CCCTCTGACCCCGACTCTCACCTGGGAGAACACCTTCTCTTCTCAATTAGTCCGA  
CTCCTCCTCAGCCTGAACTAAGCACGTTCCAGTGGGTCCGAAATCTCAGAAAAAATGA  
AACGGCTGTTGCGCAGAGGAGAA

>1925

CCGACTCTCACCTGGGAGAACACCTTCTCTTCTCAATTAGTCCGACTCCTCCTCAG  
CCTGAACTAAGCACGTTCCAGTGGGTCCGAAATCTCAGAAAAAATGAAACGGCTGTTG  
CGCAGAGGAGAAGGTTGTGGCCA

>1926

CCTGGGAGAACACCTTCTCTTCTCAATTAGTCCGACTCCTCCTCAGCCTGAACTAA  
GCACGTTCCAGTGGGTCCGAAATCTCAGAAAAAATGAAACGGCTGTTGCGCAGAGGA  
GAAGGTTGTGGCCACAGAAAGGAG

>1927

TCCTCAGCCTGAACTAAGCACGTTCCAGTGGGTCCGAAATCTCAGAAAAAATGAAACG  
GCTGTTGCGCAGAGGAGAAGGTTGTGGCCACAGAAAGGAGTTGCCTCATCAGACGTG  
AAGCCGCCACCTTGCCTTGCAAAGC

>1928

CTCAGCCTGAACTAAGCACGTTCCAGTGGGTCCGAAATCTCAGAAAAAATGAAACGG  
CTGTTGCGCAGAGGAGAAGGTTGTGGCCACAGAAAGGAGTTGCCTCATCAGACGTGA  
AGCCGCCACCTTGCTTGCAAAGCAG

>1929

GTTCCAGTGGGTCCGAAATCTCAGAAAAAATGAAACGGCTGTTGCGCAGAGGAGAAG  
GTTGTGGCCACAGAAAGGAGTTGCCTCATCAGACGTGAAGCCGCCACCTTGCTTGCA  
AAGCAGGCTGCACCTCCTGACACAC

>1930

CTCAGAAAAAATGAAACGGCTGTTGCGCAGAGGAGAAGGTTGTGGCCACAGAAAGG  
AGTTGCCTCATCAGACGTGAAGCCGCCACCTTGCTTGCAAAGCAGGCTGCACCTCCT  
GACACACCTGCCCTCCCTGCAAGAA

>1931

GAGGAGAAGGTTGTGGCCACAGAAAGGAGTTGCCTCATCAGACGTGAAGCCGCCACC  
TTGCCTTGCAAAGCAGGCTGCACCTCCTGACACACCTGCCCTCCCTGCAAGAAAGG  
GAGGGGAAATCCCACCCAAGAGAACC

>1932

GAGAAGGTTGTGGCCACAGAAAGGAGTTGCCTCATCAGACGTGAAGCCGCCACCTTG  
CCTTGCAAAGCAGGCTGCACCTCCTGACACACCTGCCCTCCCTGCAAGAAAGGGAG  
GGGAAATCCCACCCAAGAGAACCTTC

>1933

AGACGTGAAGCCGCCACCTTGCTTGCAAAGCAGGCTGCACCTCCTGACACACCTGC  
CCCTCCCTGCAAGAAAGGGAGGGGAAATCCCACCCAAGAGAACCTTCTCCAGGTTCC  
TGTGGGTTTCCAGGTTGCAACTGAA

>1934

AGCCGCCACCTTGCTTGCAAAGCAGGCTGCACCTCCTGACACACCTGCCCTCCCTG  
CAAGAAAGGGAGGGGAAATCCCACCCAAGAGAACCTTCTCCAGGTTCTGTGGGTTT  
CCAGGTTGCAACTGAAGAAAAGTG

>1935

GCAAAGCAGGCTGCACCTCCTGACACACCTGCCCTCCCTGCAAGAAAGGGAGGGGA  
AATCCCACCCAAGAGAACCTTCTCCAGGTTCTGTGGGTTTCCAGGTTGCAACTGAA  
GAAAAGTGTTAAGATTCATGTTCTC

>1936

ACCTCCTGACACACCTGCCCTCCCTGCAAGAAAGGGAGGGGAAATCCCACCCAAGA  
GAACCTTCTCCAGGTTCTGTGGGTTTCCAGGTTGCAACTGAAGAAAAGTGTTAAGA  
TTCATGTTCTCCTAAATTCTGCTTT

>1937

AAGGGAGGGGAAATCCCACCCAAGAGAACCTTCTCCAGGTTCTGTGGGTTTCCAGG  
GTTGCAACTGAAGAAAAGTGTTAAGATTCATGTTCTCCTAAATTCTGCTTTTGTCTGT  
GGCCAGTCCCACATTCTTAGTGCT

>1938

AGGGGAAATCCCACCCAAGAGAACCTTCTCCAGGTTCTGTGGGTTTCCAGGTTGCA  
ACTGAAGAAAAGTGTTAAGATTCATGTTCTCCTAAATTCTGCTTTTGTCTGTGGCCAG  
TCCCACATTCTTAGTGCTATTTG

>1939

CCAGGGTTGCAACTGAAGAAAAGTGTTAAGATTCATGTTCTCCTAAATTCTGCTTTTGT

CCTGTGGCCAGTCCCACATTCTTAGTGCTATTTGCATAAGAGGTTGCTGTTTATCTTCCT  
ATATCAGCCCCACTGATAACC

>1940

GAAGAAAAGTGTTAAGATTCATGTTCTCCTAAATTCTGCTTTTGCCTGTGGCCAGTCC  
CACATTCTTAGTGCTATTTGCATAAGAGGTTGCTGTTTATCTTCCTATATCAGCCCCACTG  
ATAACCCCTGTGGTCTGTTT

>1941

GATTCATGTTCTCCTAAATTCTGCTTTTGCCTGTGGCCAGTCCCACATTCTTAGTGCTA  
TTTGCATAAGAGGTTGCTGTTTATCTTCCTATATCAGCCCCACTGATAACCCCTGTGGTC  
TGTTTAAACAACCTATGAGGA

>1942

TGCTGTGGCCAGTCCCACATTCTTAGTGCTATTTGCATAAGAGGTTGCTGTTTATCTT  
CCTATATCAGCCCCACTGATAACCCCTGTGGTCTGTTTAAACAACCTATGAGGAGTAGATT  
ACTTGATAAATGCCAGTTTT

>1943

AGAGGTTGCTGTTTATCTTCCTATATCAGCCCCACTGATAACCCCTGTGGTCTGTTTAAAC  
AACCTATGAGGAGTAGATTACTTGATAAATGCCAGTTTTTCCAATATGCAAAGATAAAC  
TGTTGGGGTCAGGGTGAGGGG

>1944

GGTTGCTGTTTATCTTCCTATATCAGCCCCACTGATAACCCCTGTGGTCTGTTTAAACAAC  
CTATGAGGAGTAGATTACTTGATAAATGCCAGTTTTTCCAATATGCAAAGATAAACTGTT  
GGGGTCAGGGTGAGGGGTGG

>1945

TCAGCCCCACTGATAACCCCTGTGGTCTGTTTAAACAACCTATGAGGAGTAGATTACTTG  
ATAAATGCCAGTTTTTCCAATATGCAAAGATAAACTGTTGGGGTCAGGGTGAGGGGTG  
GTGTGTTATGAAGGAGGGGACAG

>1946

CCTGTGGTCTGTTTAAACAACCTATGAGGAGTAGATTACTTGATAAATGCCAGTTTTTCCA  
ATATGCAAAGATAAACTGTTGGGGTCAGGGTGAGGGGTGGTGTGTTATGAAGGAGGGG  
ACAGGTGGGGAGCCAGGACCCT

>1947

ACCTATGAGGAGTAGATTACTTGATAAATGCCAGTTTTTCCAATATGCAAAGATAAACT  
GTTGGGGTCAGGGTGAGGGGTGGTGTGTTATGAAGGAGGGGACAGGTGGGGAGCCAG  
GACCCTCTTTTAGTGGGCTGGAGA

>1948

TAAATGCCAGTTTTTCCAATATGCAAAGATAAACTGTTGGGGTCAGGGTGAGGGGTGG  
TGTGTTATGAAGGAGGGGACAGGTGGGGAGCCAGGACCCTCTTTTAGTGGGCTGGAG  
AAGTGTGAAAGAGCCTGATGAAAGA

>1949

ATGCCAGTTTTTCCAATATGCAAAGATAAACTGTTGGGGTCAGGGTGAGGGGTGGTGT  
GTTATGAAGGAGGGGACAGGTGGGGAGCCAGGACCCTCTTTTAGTGGGCTGGAGAAG  
TGTGAAAGAGCCTGATGAAAGAAAA

>1950

TTTTTCCAATATGCAAAGATAAACTGTTGGGGTCAGGGTGAGGGGTGGTGTGTTATGAA  
GGAGGGGACAGGTGGGGAGCCAGGACCCTCTTTTAGTGGGCTGGAGAAGTGTGAAAG  
AGCCTGATGAAAGAAAACAGGTAG

>1951

ATATGCAAAGATAAACTGTTGGGGTCAGGGTGAGGGGTGGTGTGTTATGAAGGAGGGG  
ACAGGTGGGGAGCCAGGACCCTCTTTTAGTGGGCTGGAGAAGTGTGAAAGAGCCTGA  
TGAAAGAAAACAGGTAGCTTGTCAC

>1952

GTTGGGGTCAGGGTGAGGGGTGGTGTGTTATGAAGGAGGGGACAGGTGGGGAGCCAG  
GACCCTCTTTTAGTGGGCTGGAGAAGTGTGAAAGAGCCTGATGAAAGAAAACAGGTA  
GCTTGTCACATAACAGCTGCATTT

>1953

GGAGGGGACAGGTGGGGAGCCAGGACCCTCTTTTAGTGGGCTGGAGAAGTGTGAAAG  
AGCCTGATGAAAGAAAACAGGTAGCTTGTCACATAACAGCTGCATTTATCATACGGT  
TGATCAGCTTCCTGCCCTCACCTA

>1954

ACAGGTGGGGAGCCAGGACCCTCTTTTAGTGGGCTGGAGAAGTGTGAAAGAGCCTGA  
TGAAAGAAAACAGGTAGCTTGTCACATAACAGCTGCATTTATCATACGGTTGATCAG  
CTCCTGCCCTCACCTACTTTTCT

>1955

TCTTTTAGTGGGCTGGAGAAGTGTGAAAGAGCCTGATGAAAGAAAACAGGTAGCTTG  
TCACATAACAGCTGCATTTATCATACGGTTGATCAGCTTCCTGCCCTCACCTACTTTT  
CTCCTCCTTCATGTGGACATGCA

>1956

AAAGAGCCTGATGAAAGAAAACAGGTAGCTTGTCACATAACAGCTGCATTTATCAT  
ACGGTTGATCAGCTTCCTGCCCTCACCTACTTTTCTCCTCCTTCATGTGGACATGCAGA  
GTCTCTGAGAACATTTATCAAG

>1957

TGCATTTATCATACGGTTGATCAGCTTCCTGCCCTCACCTACTTTTCTCCTCCTTCATGTG  
GACATGCAGAGTCTCTGAGAACATTTATCAAGTGGGTTGCCTATGCCACATTAATAC  
AAGATGGGAAAGGGTGGAGG

>1958

ATACGGTTGATCAGCTTCCTGCCCTCACCTACTTTTCTCCTCCTTCATGTGGACATGCAG  
AGTCTCTGAGAACATTTATCAAGTGGGTTGCCTATGCCACATTAATACAAGATGGGA  
AAGGGTGGAGGTTATCTTTGC

>1959

CTCCTGCCCTCACCTACTTTTCTCCTCCTTCATGTGGACATGCAGAGTCTCTGAGAAC  
ATTTATCAAGTGGGTTGCCTATGCCACATTAATACAAGATGGGAAAGGGTGGAGGTT  
ATCTTTGCTTTTTAAGTTCCCA

>1960

TTCATGTGGACATGCAGAGTCTCTGAGAACATTTATCAAGTGGGTTGCCTATGCCAC  
ATTAATACAAGATGGGAAAGGGTGGAGGTTATCTTTGCTTTTTAAGTTCCCATCTTTTTC  
TCCCTTGGTCTCTCCACCC

>1961

GAGTCTCTGAGAACATTTATCAAGTGGGTTGCCTATGCCACATTAATACAAGATGGG  
AAAGGGTGGAGGTTATCTTTGCTTTTTAAGTTCCCATCTTTTCTCCTTGGTCTCTCC  
CACCCCTACAAGTTGTTGGCT

>1962

ATCAAGTGGGTTGCCTATGCCACATTAATACAAGATGGGAAAGGGTGGAGGTTATCTT

TGCTTTTTAAGTTCATCTTTTTCTCCCTTGGTCCTCTCCACCCCTACAAGTTGTTGG  
CTGGTAAGCAATTGATGCTCA

>1963

AGGGTGGAGGTTATCTTTGCTTTTTAAGTTCATCTTTTTCTCCCTTGGTCCTCTCCCA  
CCCCTACAAGTTGTTGGCTGGTAAGCAATTGATGCTCAGAAAAATGATGTTTCATCTGAA  
ATCTTAAATGAGTGGACTTTT

>1964

TTTGCTTTTTAAGTTCATCTTTTTCTCCCTTGGTCCTCTCCACCCCTACAAGTTGTT  
GGCTGGTAAGCAATTGATGCTCAGAAAAATGATGTTTCATCTGAAATCTTAAATGAGTGG  
ACTTTTTCTACCTTCCCTGAC

>1965

TCCATCTTTTTCTCCCTTGGTCCTCTCCACCCCTACAAGTTGTTGGCTGGTAAGCAAT  
TGATGCTCAGAAAAATGATGTTTCATCTGAAATCTTAAATGAGTGGACTTTTTCTACCTT  
CCTGACTTTGCAGGTGCTTC

>1966

TGCTCAGAAAAATGATGTTTCATCTGAAATCTTAAATGAGTGGACTTTTTCTACCTTCCCT  
GACTTTGCAGGTGCTTCTTGAAGAGCCAAGGAGAAAAGAAAACCTCTGACCTCATCA  
CCTAGTCAATAAGCTGTCTGAGA

>1967

GATGTTTCATCTGAAATCTTAAATGAGTGGACTTTTTCTACCTTCCCTGACTTTGCAGGTG  
CTTCTTGAAGAGCCAAGGAGAAAAGAAAACCTCTGACCTCATCACCTAGTCAATAAGC  
TGTCTGAGAAACAAAACAAAAGA

>1968

CCTTCCCTGACTTTGCAGGTGCTTCTTGAAGAGCCAAGGAGAAAAGAAAACCTCTGA  
CCTCATCACCTAGTCAATAAGCTGTCTGAGAAACAAAACAAAAGAGTTTAGACTGGCTG  
CTAAAGCTAGGAACCCAGCTGATAG

>1969

GACTTTGCAGGTGCTTCTTGAAGAGCCAAGGAGAAAAGAAAACCTCTGACCTCATCA  
CCTAGTCAATAAGCTGTCTGAGAAACAAAACAAAAGAGTTTAGACTGGCTGCTAAAGCT  
AGGAACCCAGCTGATAGCTTTGTTT

>1970

GCCAAGGAGAAAAGAAAACCTTCTGACCTCATCACCTAGTCAATAAGCTGTCTGAGAA  
ACAAAACAAAAGAGTTTAGACTGGCTGCTAAAGCTAGGAACCCAGCTGATAGCTTTGTT  
TTGATGTCCTTGTAATGTTTGCGGA

>1971

TTCTGACCTCATCACCTAGTCAATAAGCTGTCTGAGAAACAAAACAAAAGAGTTTAGAC  
TGGCTGCTAAAGCTAGGAACCCAGCTGATAGCTTTGTTTTGATGTCCTTGAATGTTTG  
CGGATCGCAGAGGGTGCTATTTA

>1972

GACCTCATCACCTAGTCAATAAGCTGTCTGAGAAACAAAACAAAAGAGTTTAGACTGGC  
TGCTAAAGCTAGGAACCCAGCTGATAGCTTTGTTTTGATGTCCTTGAATGTTTGCGGA  
TCGCAGAGGGTGCTATTTAGAGC

>1973

TCAATAAGCTGTCTGAGAAACAAAACAAAAGAGTTTAGACTGGCTGCTAAAGCTAGGA  
ACCCAGCTGATAGCTTTGTTTTGATGTCCTTGAATGTTTGCGGATCGCAGAGGGTGCT  
ATTTAGAGCAGGGGGCATCTACTG

>1974

CTGGCTGCTAAAGCTAGGAACCCAGCTGATAGCTTTGTTTTGATGTCCTTGTAATGTTT  
GCGGATCGCAGAGGGTGCTATTTAGAGCAGGGGGCATCTACTGGGACAGACTCACTGG  
GAAGTTGAAACAGCTAGCTCAAA

>1975

GGCTGCTAAAGCTAGGAACCCAGCTGATAGCTTTGTTTTGATGTCCTTGTAATGTTTGC  
GGATCGCAGAGGGTGCTATTTAGAGCAGGGGGCATCTACTGGGACAGACTCACTGGGA  
AGTTGAAACAGCTAGCTCAAAGT

>1976

TAGGAACCCAGCTGATAGCTTTGTTTTGATGTCCTTGTAATGTTTGC  
GGATCGCAGAGGGTGCTATTTAGAGCAGGGGGCATCTACTGGGACAGACTCACTGGGAAGTTGAAACAGC  
TAGCTCAAAGTCCAAGAGATGCT

>1977

TAATGTTTGC  
GGATCGCAGAGGGTGCTATTTAGAGCAGGGGGCATCTACTGGGACAGA  
CTCACTGGGAAGTTGAAACAGCTAGCTCAAAGTCCAAGAGATGCTAAAGATAGTGAAA  
TACAGCCCAGGAATTGAGGGGGAG

>1978

CGGATCGCAGAGGGTGCTATTTAGAGCAGGGGGCATCTACTGGGACAGACTCACTGGG  
AAGTTGAAACAGCTAGCTCAAAGTCCAAGAGATGCTAAAGATAGTGAAATACAGCCCA  
GGAATTGAGGGGGAGGGGGTTCCT

>1979

TCGCAGAGGGTGCTATTTAGAGCAGGGGGCATCTACTGGGACAGACTCACTGGGAAGT  
TGAAACAGCTAGCTCAAAGTCCAAGAGATGCTAAAGATAGTGAAATACAGCCCAGGAA  
TTGAGGGGGAGGGGGTTCCTCACT

>1980

TTTAGAGCAGGGGGCATCTACTGGGACAGACTCACTGGGAAGTTGAAACAGCTAGCTC  
AAAGTCCAAGAGATGCTAAAGATAGTGAAATACAGCCCAGGAATTGAGGGGGAGGGG  
GTTCTCACTCAAGAAGGAGACTTT

>1981

GGGAAGTTGAAACAGCTAGCTCAAAGTCCAAGAGATGCTAAAGATAGTGAAATACAG  
CCCAGGAATTGAGGGGGAGGGGGTTCCTCACTCAAGAAGGAGACTTTCTAGGAGGGG  
GCGGGCGTGGTATTTTCTAGGGACAG

>1982

TTGAAACAGCTAGCTCAAAGTCCAAGAGATGCTAAAGATAGTGAAATACAGCCCAGGA  
ATTGAGGGGGAGGGGGTTCCTCACTCAAGAAGGAGACTTTCTAGGAGGGGGCGGGCG  
TGGTATTTTCTAGGGACAGTATGGA

>1983

AAGTCCAAGAGATGCTAAAGATAGTGAAATACAGCCCAGGAATTGAGGGGGAGGGGG  
TTCCTCACTCAAGAAGGAGACTTTCTAGGAGGGGGCGGGCGTGGTATTTTCTAGGGAC  
AGTATGGAATGAAGGGAAGAAGTT

>1984

ATTGAGGGGGAGGGGGTTCCTCACTCAAGAAGGAGACTTTCTAGGAGGGGGCGGGCG  
TGGTATTTTCTAGGGACAGTATGGAATGAAGGGAAGAAGTTGGCTTTAGAAGGAGGC  
ACCCTGTGGGAGGCTGAGACAGGTG

>1985

GGGGAGGGGGTTCCTCACTCAAGAAGGAGACTTTCTAGGAGGGGGCGGGCGTGGTAT

TTTCTAGGGACAGTATGGAATGAAGGGAAGAAGGTTGGCTTTAGAAGGAGGCACCCCT  
GTGGGAGGCTGAGACAGGTGGGTAC

>1986

CCTCACTCAAGAAGGAGACTTTCTAGGAGGGGGCGGGCGTGGTATTTTCTAGGGACAG  
TATGGAATGAAGGGAAGAAGGTTGGCTTTAGAAGGAGGCACCCCTGTGGGAGGCTGAG  
ACAGGTGGGTACCTGAGGTCAGGA

>1987

TGGTATTTTCTAGGGACAGTATGGAATGAAGGGAAGAAGGTTGGCTTTAGAAGGAGGC  
ACCCTGTGGGAGGCTGAGACAGGTGGGTACCTGAGGTCAGGAGTTTGAGACCAGCC  
TGGCCAACATGGTGAAACCCAGTCT

>1988

TTTCTAGGGACAGTATGGAATGAAGGGAAGAAGGTTGGCTTTAGAAGGAGGCACCCCT  
GTGGGAGGCTGAGACAGGTGGGTACCTGAGGTCAGGAGTTTGAGACCAGCCTGGCC  
AACATGGTGAAACCCAGTCTCTACTA

>1989

AATGAAGGGAAGAAGGTTGGCTTTAGAAGGAGGCACCCCTGTGGGAGGCTGAGACAG  
GTGGGTACCTGAGGTCAGGAGTTTGAGACCAGCCTGGCCAACATGGTGAAACCCAG  
TCTCTACTAAAAATACAAAATTAGCT

>1990

GAGGCTGAGACAGGTGGGTACCTGAGGTCAGGAGTTTGAGACCAGCCTGGCCAACA  
TGGTGAAACCCAGTCTCTACTAAAAATACAAAATTAGCTGGGTGGCAGGTGCCTGTA  
ATCCCAGCTAGTCGGGGGAGGCTGA

>1991

AGGTCAGGAGTTTGAGACCAGCCTGGCCAACATGGTGAAACCCAGTCTCTACTAAAAA  
TACAAAATTAGCTGGGTGGCAGGTGCCTGTAATCCCAGCTAGTCGGGGGAGGCTGAG  
GCAGGAAAATCGCTTGGGATTACA

>1992

CAACATGGTGAAACCCAGTCTCTACTAAAAATACAAAATTAGCTGGGTGGCAGGTGC  
CTGTAATCCCAGCTAGTCGGGGGAGGCTGAGGCAGGAAAATCGCTTGGGATTACAGGT  
GCCTGTAATCCCAGCTAGTCGGGA

>1993

ATGGTGAAACCCAGTCTCTACTAAAAATACAAAATTAGCTGGGTGGCAGGTGCCTGT  
AATCCCAGCTAGTCGGGGGAGGCTGAGGCAGGAAAATCGCTTGGGATTACAGGTGCCT  
GTAATCCCAGCTAGTCGGGAGAGG

>1994

CCCAGTCTCTACTAAAAATACAAAATTAGCTGGGTGGCAGGTGCCTGTAATCCCAGCT  
AGTCGGGGGAGGCTGAGGCAGGAAAATCGCTTGGGATTACAGGTGCCTGTAATCCCA  
GCTAGTCGGGAGAGGCTGAGGCAG

>1995

TGGGTGGCAGGTGCCTGTAATCCCAGCTAGTCGGGGGAGGCTGAGGCAGGAAAATCG  
CTTGGGATTACAGGTGCCTGTAATCCCAGCTAGTCGGGAGAGGCTGAGGCAGGAAAAT  
TGCTTGAAGGAGGCGGAGGTTGCAG

>1996

GTAATCCCAGCTAGTCGGGGGAGGCTGAGGCAGGAAAATCGCTTGGGATTACAGGTGC  
CTGTAATCCCAGCTAGTCGGGAGAGGCTGAGGCAGGAAAATTGCTTGAAGGAGGCGG  
AGGTTGCAGTGAGCCCAGATCCTGC



>1997

TCCACGCTAGTCGGGGGAGGCTGAGGCAGGAAAATCGCTTGGGATTACAGGTGCCTGT  
AATCCCAGCTAGTCGGGAGAGGCTGAGGCAGGAAAATTGCTTGAAGGAGGCGGAGGT  
TGCAGTGAGCCCAGATCCTGCCGTT

>1998

TAGTCGGGGGAGGCTGAGGCAGGAAAATCGCTTGGGATTACAGGTGCCTGTAATCCCA  
GCTAGTCGGGAGAGGCTGAGGCAGGAAAATTGCTTGAAGGAGGCGGAGGTTGCAGTG  
AGCCCAGATCCTGCCGTTGCACTCC

>1999

TCGCTTGGGATTACAGGTGCCTGTAATCCCAGCTAGTCGGGAGAGGCTGAGGCAGGAA  
AATTGCTTGAAGGAGGCGGAGGTTGCAGTGAGCCCAGATCCTGCCGTTGCACTCCAGC  
CCAAGACTTTGTCTCATTAAAAAAA

>2000

CTGTAATCCCAGCTAGTCGGGAGAGGCTGAGGCAGGAAAATTGCTTGAAGGAGGCGG  
AGGTTGCAGTGAGCCCAGATCCTGCCGTTGCACTCCAGCCCAAGACTTTGTCTCATT  
AAAAAAAAAAAAAGAAGAAGAAGAAG

>2001

ATCCCAGCTAGTCGGGAGAGGCTGAGGCAGGAAAATTGCTTGAAGGAGGCGGAGGTT  
GCAGTGAGCCCAGATCCTGCCGTTGCACTCCAGCCCAAGACTTTGTCTCATTAAAAAA  
AAAAAAGAAGAAGAAGAAGAAGGA

>2002

GCTGAGGCAGGAAAATTGCTTGAAGGAGGCGGAGGTTGCAGTGAGCCCAGATCCTGC  
CGTTGCACTCCAGCCCAAGACTTTGTCTCATTAAAAAAAAAAAAAGAAGAAGAAGAA  
GAAGGAGGCACCCTGGATGAAGACTC

>2003

GGTTGCAGTGAGCCCAGATCCTGCCGTTGCACTCCAGCCCAAGACTTTGTCTCATTAA  
AAAAAAAAAAAAAGAAGAAGAAGAAGGAGGCACCCTGGATGAAGACTCAGGCTCC  
AGAATTTACTATCTGTATGTCTTGGG

>2004

TGCAGTGAGCCCAGATCCTGCCGTTGCACTCCAGCCCAAGACTTTGTCTCATTAAAAAA  
AAAAAAGAAGAAGAAGAAGAAGGAGGCACCCTGGATGAAGACTCAGGCTCCAGA  
ATTTACTATCTGTATGTCTTGGGCAA

>2005

AGTGAGCCCAGATCCTGCCGTTGCACTCCAGCCCAAGACTTTGTCTCATTAAAAAAA  
AAAAAGAAGAAGAAGAAGAAGGAGGCACCCTGGATGAAGACTCAGGCTCCAGAATT  
TACTATCTGTATGTCTTGGGCAAGTG

>2006

AGATCCTGCCGTTGCACTCCAGCCCAAGACTTTGTCTCATTAAAAAAAAAAAAAGAAG  
AAGAAGAAGAAGGAGGCACCCTGGATGAAGACTCAGGCTCCAGAATTTACTATCTGTA  
TGTCTTGGGCAAGTGGCTTAGCTT

>2007

CCAGCCCAAGACTTTGTCTCATTAAAAAAAAAAAAAGAAGAAGAAGAAGAAGGAGG  
CACCTGGATGAAGACTCAGGCTCCAGAATTTACTATCTGTATGTCTTGGGCAAGTGGC  
TTAGCTTCTCTGAGCCCCTGTTTAC

>2008

AGAAGAAGAAGGAGGCACCCTGGATGAAGACTCAGGCTCCAGAATTTACTATCTGTAT

GTCTTGGGCAAGTGGCTTAGCTTCTCTGAGCCCCTGTTACTTTCTTTTGAAAATGAC  
CACCTTGCCATGGTAATGAGGA

>2009

AAGGAGGCACCCTGGATGAAGACTCAGGCTCCAGAATTTACTATCTGTATGTCTTGGGC  
AAGTGGCTTAGCTTCTCTGAGCCCCTGTTACTTTCTTTTGAAAATGACCACCTTGTC  
CATGGTAATGAGGATAAAAAAC

>2010

AGTGGCTTAGCTTCTCTGAGCCCCTGTTACTTTCTTTTGAAAATGACCACCTTGCCA  
TGGAATGAGGATAAAAAACGTGTAAAGTGCATAGCAGAGTGCAGGTGTACTGGGTAG  
ACATGTATGATTGCGCTGTAGC

>2011

AGCCCCTGTTACTTTCTTTTGAAAATGACCACCTTGCCATGGTAATGAGGATAAAA  
AACGTGTAAAGTGCATAGCAGAGTGCAGGTGTACTGGGTAGACATGTATGATTGCGCT  
GTAGCCCCTGTTATGGCCCGGGGA

>2012

CCACCTTGCCATGGTAATGAGGATAAAAAACGTGTAAAGTGCATAGCAGAGTGCAGG  
TGACTGGGTAGACATGTATGATTGCGCTGTAGCCCTGTTATGGCCCGGGGAGAACTA  
TGAAAGGAACCAAGTAAATCTTT

>2013

GGATAAAAAACGTGTAAAGTGCATAGCAGAGTGCAGGTGTACTGGGTAGACATGTATG  
ATTGCGCTGTAGCCCTGTTATGGCCCGGGGAGAACTATGAAAGGAACCAAGTAAATC  
TTTTGTTTTGGGCACTGCTAAATT

>2014

GCATAGCAGAGTGCAGGTGTACTGGGTAGACATGTATGATTGCGCTGTAGCCCTGTTAT  
GGCCCGGGGAGAACTATGAAAGGAACCAAGTAAATCTTTGTTTTGGGCACTGCTAA  
ATTGATGATAGTACTAACCCTGT

>2015

GCAGGTGTACTGGGTAGACATGTATGATTGCGCTGTAGCCCTGTTATGGCCCGGGGAGA  
AACTATGAAAGGAACCAAGTAAATCTTTGTTTTGGGCACTGCTAAATTGATGATAGTA  
CTAACCCCTGTGCTAGCAGCCAG

>2016

TACTGGGTAGACATGTATGATTGCGCTGTAGCCCTGTTATGGCCCGGGGAGAACTATG  
AAAGGAACCAAGTAAATCTTTGTTTTGGGCACTGCTAAATTGATGATAGTACTAACC  
TGTGCTAGCAGCCAGCCGGTGA

>2017

TGGCCCGGGGAGAACTATGAAAGGAACCAAGTAAATCTTTGTTTTGGGCACTGCTA  
AATTGATGATAGTACTAACCCTGTGCTAGCAGCCAGCCGGTGAATAATAGGTGAATAA  
TGTTAGTACATTGTGAATATAAA

>2018

ATGAAAGGAACCAAGTAAATCTTTGTTTTGGGCACTGCTAAATTGATGATAGTACTAA  
CCCTGTGCTAGCAGCCAGCCGGTGAATAATAGGTGAATAATGTTAGTACATTGTGAAT  
ATAAAAGTTTCCATTTGCAAAG

>2019

AAAGGAACCAAGTAAATCTTTGTTTTGGGCACTGCTAAATTGATGATAGTACTAACC  
TGTGCTAGCAGCCAGCCGGTGAATAATAGGTGAATAATGTTAGTACATTGTGAATATA  
AAAGTTTCCATTTGCAAAGTGC

>2020

TTTGTTTTGGGCACTGCTAAATTGATGATAGTACTAACCCCTGTGCTAGCAGCCAGCCGG  
TGAAATAATAGGTGAATAATGTTAGTACATTGTGAATATAAAAGTTCCATTTGCAAAGT  
GCTACTGCTGTTCTAAAGAAG

>2021

CTAACCCCTGTGCTAGCAGCCAGCCGGTGAATAATAGGTGAATAATGTTAGTACATTGT  
GAATATAAAAGTTCCATTTGCAAAGTGCTACTGCTGTTCTAAAGAAGCCACATTTCTA  
ATAAATGATTGCTTAATCCTGT

>2022

CAGCCAGCCGGTGAATAATAGGTGAATAATGTTAGTACATTGTGAATATAAAAGTTTC  
CATTTGCAAAGTGCTACTGCTGTTCTAAAGAAGCCACATTTCTAATAAATGATTGCTTAA  
TCCTGTGATGCTGCCACAGCC

>2023

TAGGTGAATAATGTTAGTACATTGTGAATATAAAAGTTTCATTTGCAAAGTGCTACTGC  
TGTTCTAAAGAAGCCACATTTCTAATAAATGATTGCTTAATCCTGTGATGCTGCCACAGC  
CCCACAGAGTTTGGGAATGT

>2024

AGTGCTACTGCTGTTCTAAAGAAGCCACATTTCTAATAAATGATTGCTTAATCCTGTGAT  
GCTGCCACAGCCCCACAGAGTTTGGGAATGTTTGGGAATTCTTTCTGAAGTGTGTGCC  
GCATTCTTTTGCTTTGCCTTTT

>2025

TGCTGTTCTAAAGAAGCCACATTTCTAATAAATGATTGCTTAATCCTGTGATGCTGCCAC  
AGCCCCACAGAGTTTGGGAATGTTTGGGAATTCTTTCTGAAGTGTGTGCCGCATTCTTT  
TGCTTTGCCTTTTGGGAGGGT

>2026

TGATTGCTTAATCCTGTGATGCTGCCACAGCCCCACAGAGTTTGGGAATGTTTGGGAAT  
TCTTTCTGAAGTGTGTGCCGCATTCTTTTGCTTTGCCTTTTGGGAGGGTAGATGTGACTA  
TTGAAAATGGTCAAATAATG

>2027

CAGAGTTTGGGAATGTTTGGGAATTCTTTCTGAAGTGTGTGCCGCATTCTTTTGCTTTG  
CCTTTTGGGAGGGTAGATGTGACTATTGAAAATGGTCAAATAATGCAGTAGCAAATCT  
GTTGACTATAGTGAGTGATAAG

>2028

GTGCCGCATTCTTTTGCTTTGCCTTTTGGGAGGGTAGATGTGACTATTGAAAATGGTCA  
AAATAATGCAGTAGCAAATCTGTTGACTATAGTGAGTGATAAGCACTGTGCGCTGCTGT  
GTCTGACTCGGAAGGCAGATTC

>2029

CCGCATTCTTTTGCTTTGCCTTTTGGGAGGGTAGATGTGACTATTGAAAATGGTCAAAA  
TAATGCAGTAGCAAATCTGTTGACTATAGTGAGTGATAAGCACTGTGCGCTGCTGTGTC  
TGACTCGGAAGGCAGATTCTGG

>2030

TTGGGAGGGTAGATGTGACTATTGAAAATGGTCAAATAATGCAGTAGCAAATCTGTTG  
ACTATAGTGAGTGATAAGCACTGTGCGCTGCTGTGTCTGACTCGGAAGGCAGATTCTG  
GAAGGGGTGTGTGGGAAGGCTT

>2031

TAATGCAGTAGCAAATCTGTTGACTATAGTGAGTGATAAGCACTGTGCGCTGCTGTGTC

TGACTCGGAAGGCAGATTCTGGAAGGGGTGTGTGGGGAAGGCTTGTGGCTCAGCAC  
TGGGGTGAGTGTGGCCTCACTTC

>2032

GCAGTAGCAAATCTGTTGACTATAGTGAGTGATAAGCACTGTCGGCTGCTGTGTCTGAC  
TCGGAAGGCAGATTCTGGAAGGGGTGTGTGGGGAAGGCTTGTGGCTCAGCACTGGG  
GTGAGTGTGGCCTCACTTCTTAG

>2033

TGAGTGATAAGCACTGTCGGCTGCTGTGTCTGACTCGGAAGGCAGATTCTGGAAGGGG  
TGTGTGGGGAAGGCTTGTGGCTCAGCACTGGGGTGAGTGTGGCCTCACTTCTTAGG  
TGGGAAGTGGACAAGGCCAAGGGG

>2034

TGTCGGCTGCTGTGTCTGACTCGGAAGGCAGATTCTGGAAGGGGTGTGTGGGGAAGG  
CTTGTGGCTCAGCACTGGGGTGAGTGTGGCCTCACTTCTTAGGTGGGAAGTGGACA  
AGGCCAAGGGGCTTTTGATTCCAG

>2035

TGTCTGACTCGGAAGGCAGATTCTGGAAGGGGTGTGTGGGGAAGGCTTGTGGCTCA  
GCACTGGGGTGAGTGTGGCCTCACTTCTTAGGTGGGAAGTGGACAAGGCCAAGGGG  
CTTTTGATTCCAGCTACTATGGCTG

>2036

ATTCTGGAAGGGGTGTGTGGGGAAGGCTTGTGGCTCAGCACTGGGGTGAGTGTGG  
CCTCACTTCTTAGGTGGGAAGTGGACAAGGCCAAGGGGCTTTTGATTCCAGCTACTAT  
GGCTGGACTCCCAGTGAGGAAGGA

>2037

AAGGCTTGTGGCTCAGCACTGGGGTGAGTGTGGCCTCACTTCTTAGGTGGGAAGTG  
GACAAGGCCAAGGGGCTTTTGATTCCAGCTACTATGGCTGGACTCCCAGTGAGGAAG  
GAGTCGCTGCCATGGATTGCCTGG

>2038

CACTGGGGTGAGTGTGGCCTCACTTCTTAGGTGGGAAGTGGACAAGGCCAAGGGGC  
TTTTGATTCCAGCTACTATGGCTGGACTCCCAGTGAGGAAGGAGTCGCTGCCATGGAT  
TGCCTGGGACTGGGAAGACTCCTT

>2039

CACTTCTTAGGTGGGAAGTGGACAAGGCCAAGGGGCTTTTGATTCCAGCTACTATGG  
CTGGACTCCCAGTGAGGAAGGAGTCGCTGCCATGGATTGCCTGGGACTGGGAAGACT  
CCTTTAACTGCTGTAATGTTCTG

>2040

TTTCCAGCTACTATGGCTGGACTCCCAGTGAGGAAGGAGTCGCTGCCATGGATTGCCT  
GGGACTGGGAAGACTCCTTTAACTGCTGTAATGTTTCTGCATTTGTGGTTTGGCCTCC  
TGTGAGTTTGGGCTCCGGGGCGG

>2041

TGCCTGGGACTGGGAAGACTCCTTTAACTGCTGTAATGTTTCTGCATTTGTGGTTTGG  
CCTCCTGTGAGTTTGGGCTCCGGGGCGGCACTTCTGTTGTTAAAAGAACAGAAAAGA  
AAACAAAACAAAACAAAAAACCAG

>2042

AATGTTTCTGCATTTGTGGTTTGGCCTCCTGTGAGTTTGGGCTCCGGGGCGGCACTTCT  
GTTGTTAAAAGAACAGAAAAGAAAACAAAACAAAACAAAAAACCAGGACTGTCACT  
GTTAGATGTTGGTTGAGGCTAGAAA

>2043

TTTGGGCTCCGGGGCGGCACTTCTGTTGTTAAAAGAACAGAAAAGAAAACAAAACAA  
AACAAAAACCAGGACTGTCACTGTTAGATGTTGGTTGAGGCTAGAAAGAATGGATTG  
AGTTTTGACCCCTACACCCAGGG

>2044

GGCACTTCTGTTGTTAAAAGAACAGAAAAGAAAACAAAACAAAACAAAACACCAGG  
ACTGTCACTGTTAGATGTTGGTTGAGGCTAGAAAGAATGGATTGAGTTTTGACCCCTA  
CACCCAGGGAGTAGGGAGGCCTGG

>2045

ACAGAAAAGAAAACAAAACAAAACAAAACAAAACACCAGGACTGTCACTGTTAGATGTTGGT  
TGAGGCTAGAAAGAATGGATTGAGTTTTGACCCCTACACCCAGGGAGTAGGGAGGC  
CTGGGAGGCACAGTGGCCTGAGTTT

>2046

AACAAAACAAAACAAAACAAAACAAAACAAAACACCAGGACTGTCACTGTTAGATGTTGGTTGAGGCTAGAA  
AGAATGGATTGAGTTTTGACCCCTACACCCAGGGAGTAGGGAGGCCTGGGAGGCA  
CAGTGGCCTGAGTTTGAATTCTGACT

>2047

AGGACTGTCACTGTTAGATGTTGGTTGAGGCTAGAAAGAATGGATTGAGTTTTGACCC  
CCTACACCCAGGGAGTAGGGAGGCCTGGGAGGCACAGTGGCCTGAGTTTGAATTCT  
GACTCTGCCTCTTTGGAAGGCTCTG

>2048

TGTTAGATGTTGGTTGAGGCTAGAAAGAATGGATTGAGTTTTGACCCCTACACCCAG  
GGAGTAGGGAGGCCTGGGAGGCACAGTGGCCTGAGTTTGAATTCTGACTCTGCCTCTT  
TGGAAGGCTCTGGAAGGTTAAAG

>2049

AAGAATGGATTGAGTTTTGACCCCTACACCCAGGGAGTAGGGAGGCCTGGGAGGC  
ACAGTGGCCTGAGTTTGAATTCTGACTCTGCCTCTTTGGAAGGCTCTGGAAGGTTAA  
GGAGCTTGTGTGTTCAAATCTTAGC

>2050

CCCCAGGGAGTAGGGAGGCCTGGGAGGCACAGTGGCCTGAGTTTGAATTCTGACTCT  
GCCTCTTTGGAAGGCTCTGGAAGGTTAAAGGAGCTTGTGTGTTCAAATCTTAGCCTGG  
TACCTGGCATATACTCAGCATGTAT

>2051

TAGGGAGGCCTGGGAGGCACAGTGGCCTGAGTTTGAATTCTGACTCTGCCTCTTTGGA  
AGGCTCTGGAAGGTTAAAGGAGCTTGTGTGTTCAAATCTTAGCCTGGTACCTGGCATAT  
ACTCAGCATGTATTTTTCCCT

>2052

GTTTGAATTCTGACTCTGCCTCTTTGGAAGGCTCTGGAAGGTTAAAGGAGCTTGTGTG  
TTCAAATCTTAGCCTGGTACCTGGCATATACTCAGCATGTATTTTTCCCTTTCTGAC  
AATGTTCTTGCCCCGAACACT

>2053

TTGGAAGGCTCTGGAAGGTTAAAGGAGCTTGTGTGTTCAAATCTTAGCCTGGTACCTG  
GCATATACTCAGCATGTATTTTTCCCTTTCTGACAATGTTCTTGCCCCGAACACTT  
GAATAGTGGAGAGAGGAATGTT

>2054

CCTGGCATATACTCAGCATGTATTTTTCCCTTTCTGACAATGTTCTTGCCCCGAAC

ACTTGAATAGTGGAGAGAGGAATGTTTGCTTTTCCTCTCCATTGAACCAACACTCGCCC  
ATCCACTGAGCCCAAGATTCA

>2055

CATATACTCAGCATGTATTTTTCCCTTTCTGACAATGTTCTTGCCCCGAACACTTG  
AATAGTGGAGAGAGGAATGTTTGCTTTTCCTCTCCATTGAACCAACACTCGCCCATCCA  
CTGAGCCCAAGATTCACCTTA

>2056

CACTTGAATAGTGGAGAGAGGAATGTTTGCTTTTCCTCTCCATTGAACCAACACTCGCC  
CATCCACTGAGCCCAAGATTCACCTTAGGATTGTCTGTTGGACTCGGCTCTTTTGTGAC  
CTAACAGTGCAGGGGCCTTGTG

>2057

AATAGTGGAGAGAGGAATGTTTGCTTTTCCTCTCCATTGAACCAACACTCGCCCATCCA  
CTGAGCCCAAGATTCACCTTAGGATTGTCTGTTGGACTCGGCTCTTTTGTGACCTAACA  
GTGCAGGGGCCTTGTGCTGAGC

>2058

CGCCCATCCACTGAGCCCAAGATTCACCTTAGGATTGTCTGTTGGACTCGGCTCTTTTG  
TGACCTAACAGTGCAGGGGCCTTGTGCTGAGCTGCACATGCTCGCTCTCGCTGGTGCT  
CCCTCTCTCTCTCTCTCTGTC

>2059

ATCCACTGAGCCCAAGATTCACCTTAGGATTGTCTGTTGGACTCGGCTCTTTTGTGACC  
TAACAGTGCAGGGGCCTTGTGCTGAGCTGCACATGCTCGCTCTCGCTGGTGCTCCCTC  
TCTCTCTCTCTCTGTCTGCAT

>2060

GCTGAGCTGCACATGCTCGCTCTCGCTGGTGCTCCCTCTCTCTCTCTCTCTGTCTGC  
ATTATTTATAGTAAACCATATTAGAACAGAGTGTTAAAGAGGAAGGATGAGTCATTCCC  
ATTGAAACCATTGATGACATAA

>2061

GCTCTCGCTGGTGCTCCCTCTCTCTCTCTCTCTGTCTGCATTATTTATAGTAAACCATA  
TTAGAACAGAGTGTTAAAGAGGAAGGATGAGTCATTCCCATTGAAACCATTGATGACA  
TAAATAAAAGCAAATGCTTA

>2062

TCTCGCTGGTGCTCCCTCTCTCTCTCTCTGTCTGCATTATTTATAGTAAACCATATT  
AGAACAGAGTGTTAAAGAGGAAGGATGAGTCATTCCCATTGAAACCATTGATGACATA  
AATAAAAGCAAATGCTTACT

>2063

GTGCTCCCTCTCTCTCTCTCTGTCTGCATTATTTATAGTAAACCATATTAGAACAGA  
GTGTTAAAGAGGAAGGATGAGTCATTCCCATTGAAACCATTGATGACATAAATAAAAG  
CAAATGCTTACTATGTGTTT

>2064

TATTAGAACAGAGTGTTAAAGAGGAAGGATGAGTCATTCCCATTGAAACCATTGATGA  
CATAAATAAAAGCAAATGCTTACTATGTGTTTGTGTCAGTATTTAAGGCCAGGTTGTG  
CTAATTTGAATGCTCCCAAACCTG

>2065

ATGAGTCATTCCCATTGAAACCATTGATGACATAAATAAAAGCAAATGCTTACTATGT  
GTTTTGTGTCAGTATTTAAGGCCAGGTTGTGCTAATTTGAATGCTCCCAAACCTGGATCTG  
TGAAAGCATAACATATGTGGGAA

>2066

TTCCCATTGAAACCATTGATGACATAAATAAAAGCAAATGCTTACTATGTGTTTTGTGC  
AGTATTTAAGGCCAGGTTGTGCTAATTTGAATGCTCCCAAAGGATCTGTGAAAGCAT  
ACATATGTGGGAAAAAATTC

>2067

TATGTGTTTTGTGCAGTATTTAAGGCCAGGTTGTGCTAATTTGAATGCTCCCAAAGGGA  
TCTGTGAAAGCATAACATATGTGGGAAAAAATTCAGGTTAACTAGAGGGAAGTTATTTA  
TTGAAAATCCATTTAGTATC

>2068

CCAGGTTGTGCTAATTTGAATGCTCCCAAAGGATCTGTGAAAGCATAACATATGTGGG  
AAAAAATTCAGGTTAACTAGAGGGAAGTTATTTATTGAAAATCCATTTAGTATCTGCT  
TTCTCCCTTCTATTTACTCA

>2069

CTAATTTGAATGCTCCCAAAGGATCTGTGAAAGCATAACATATGTGGGAAAAAATTC  
GGTTAACTAGAGGGAAGTTATTTATTGAAAATCCATTTAGTATCTGCTTTCTCCCTC  
TATTTACTTCAGATCCATATT

>2070

AATTTGAATGCTCCCAAAGGATCTGTGAAAGCATAACATATGTGGGAAAAAATTCAGG  
TTAACTAGAGGGAAGTTATTTATTGAAAATCCATTTAGTATCTGCTTTCTCCCTCTAT  
TTACTTCAGATCCATATTCA

>2071

GAATGCTCCCAAAGGATCTGTGAAAGCATAACATATGTGGGAAAAAATTCAGGTTAA  
CTAGAGGGAAGTTATTTATTGAAAATCCATTTAGTATCTGCTTTCTCCCTTCTATTTACT  
TCAGATCCATATTCATATCA

>2072

AAAGCATAACATATGTGGGAAAAAATTCAGGTTAACTAGAGGGAAGTTATTTATTGAAA  
ATCCATTTAGTATCTGCTTTCTCCCTTCTATTTACTTCAGATCCATATTCATATCATGCTT  
GTTGTTCTGGCTAACGAGA

>2073

TTAACTAGAGGGAAGTTATTTATTGAAAATCCATTTAGTATCTGCTTTCTCCCTTCTAT  
TTACTTCAGATCCATATTCATATCATGCTTGTGTTCTGGCTAACGAGAGGGACTGGCTT  
ATTCAGCTAAGGTTTG

>2074

GTATCTGCTTTCTCCCTTCTATTTACTTCAGATCCATATTCATATCATGCTTGTGTTCTGG  
CTAACGAGAGGGACTGGCTTATTCAGCTAAGGTTGTTTATTTTCGGAAGGTTGAG  
GAATAGCACAGAGAGGTTG

>2075

TTACTTCAGATCCATATTCATATCATGCTTGTGTTCTGGCTAACGAGAGGGACTGGCT  
TATTCAGCTAAGGTTGTTTATTTTCGGAAGGTTGAGGAATAGCACAGAGAGGTTG  
TCTAAGTGTCCCTGTCTCCAT

>2076

TTCAGATCCATATTCATATCATGCTTGTGTTCTGGCTAACGAGAGGGACTGGCTTATTC  
ACTAGCTAAGGTTGTTTATTTTCGGAAGGTTGAGGAATAGCACAGAGAGGTTGTCTAA  
GTGTCCCTGTCTCCATTCCTC

>2077

CATGCTTGTGTTCTGGCTAACGAGAGGGACTGGCTTATTCAGCTAAGGTTGTTT

ATTTTCGGAAGGTTGAGGAATAGCACAGAGAGGTTGTCTAAGTGTCCCTGTCTCCATTC  
CTCCTCTTGCCACCTGTTGAGG

>2078

TCTGGCTAACGAGAGGGACTGGCTTATTCACTAGCTAAGGTTTGTATTTCGGAAGG  
TTGAGGAATAGCACAGAGAGGTTGTCTAAGTGTCCCTGTCTCCATTCTCCTCTTGCCA  
CCTGTTGAGGAAGGCACTCTCC

>2079

GGTTGAGGAATAGCACAGAGAGGTTGTCTAAGTGTCCCTGTCTCCATTCTCCTCTTGC  
CACCTGTTGAGGAAGGCACTCTCCACCTGCTTTGCAGGCGTGGGCTCTCAATGTGTCC  
AAGAATCACAGTCAGAGCTGAAG

>2080

GAGGAATAGCACAGAGAGGTTGTCTAAGTGTCCCTGTCTCCATTCTCCTCTTGCCACC  
TGTTGAGGAAGGCACTCTCCACCTGCTTTGCAGGCGTGGGCTCTCAATGTGTCCAAGA  
ATCACAGTCAGAGCTGAAGGGCC

>2081

TCTAAGTGTCCCTGTCTCCATTCTCCTCTTGCCACCTGTTGAGGAAGGCACTCTCCAC  
CTGCTTTGCAGGCGTGGGCTCTCAATGTGTCCAAGAATCACAGTCAGAGCTGAAGGGC  
CCTTGGAATCATTTATTGCAGCA

>2082

TCCTCTTGCCACCTGTTGAGGAAGGCACTCTCCACCTGCTTTGCAGGCGTGGGCTCTC  
AATGTGTCCAAGAATCACAGTCAGAGCTGAAGGGCCCTTGGAATCATTTATTGCAGCAT  
GCTCATTTGGGAGGAGTAAGTGG

>2083

CCACCTGTTGAGGAAGGCACTCTCCACCTGCTTTGCAGGCGTGGGCTCTCAATGTGTG  
CAAGAATCACAGTCAGAGCTGAAGGGCCCTTGGAATCATTTATTGCAGCATGCTCATTT  
GGGAGGAGTAAGTGGAGGTCCAG

>2084

AGGCGTGGGCTCTCAATGTGTCCAAGAATCACAGTCAGAGCTGAAGGGCCCTTGGAAT  
CATTTATTGCAGCATGCTCATTTGGGAGGAGTAAGTGGAGGTCCAGAGAGGTTCTGTG  
ATTTCCCTAGGTCACACAGCAAG

>2085

TGTGTCCAAGAATCACAGTCAGAGCTGAAGGGCCCTTGGAATCATTTATTGCAGCATG  
CTCATTTGGGAGGAGTAAGTGGAGGTCCAGAGAGGTTCTGTGATTTCCCTAGGTCAC  
ACAGCAAGCTAGAGGCAAACCCAG

>2086

TCACAGTCAGAGCTGAAGGGCCCTTGGAATCATTTATTGCAGCATGCTCATTTGGGAGG  
AGTAAGTGGAGGTCCAGAGAGGTTCTGTGATTTCCCTAGGTCACACAGCAAGCTAGA  
GGCAAACCCAGGACCCTCACTCC

>2087

TCATTTATTGCAGCATGCTCATTTGGGAGGAGTAAGTGGAGGTCCAGAGAGGTTCTGT  
GATTTCCCTAGGTCACACAGCAAGCTAGAGGCAAACCCAGGACCCTCACTCCCAGCC  
CACTTTAATTCTCCTTACAAGC

>2088

GCAGCATGCTCATTTGGGAGGAGTAAGTGGAGGTCCAGAGAGGTTCTGTGATTTCCC  
TAGGTCACACAGCAAGCTAGAGGCAAACCCAGGACCCTCACTCCCAGCCCACTTTAAT  
TCTTCCTTACAAGCCTGCCTGTG



>2089

CTCATTGGGAGGAGTAAGTGGAGGTCCAGAGAGGTTCTGTGATTTCCCTAGGTCAC  
ACAGCAAGCTAGAGGCAAACCAGGACCCTCACTCCCAGCCACTTTAATTCTTCCT  
CACAAGCCTGCCTGTGACTGCCCA

>2090

CAGAGAGGTTCTGTGATTTCCCTAGGTCACACAGCAAGCTAGAGGCAAACCAGGA  
CCCTCACTCCCAGCCACTTTAATTCTTCCTTACAAGCCTGCCTGTGACTGCCCAGGT  
CTGTTCTCTGCTTCTACCAAGGGG

>2091

GGTCACACAGCAAGCTAGAGGCAAACCAGGACCCTCACTCCCAGCCACTTTAATTC  
TTCCTTACAAGCCTGCCTGTGACTGCCCAGGTCTGTTCTCTGCTTCTACCAAGGGGTA  
GGCAAGACTAGAATCTGACTTGA

>2092

GGCAAACCAGGACCCTCACTCCCAGCCACTTTAATTCTTCCTTACAAGCCTGCCT  
GTGACTGCCCAGGTCTGTTCTCTGCTTCTACCAAGGGGTAGGCAAGACTAGAATCTGA  
CTTGAGAGCAGTTTCAGATCTTTG

>2093

CAGCCACTTTAATTCTTCCTTACAAGCCTGCCTGTGACTGCCCAGGTCTGTTCTCTG  
CTTCTACCAAGGGGTAGGCAAGACTAGAATCTGACTTGAGAGCAGTTTCAGATCTTTG  
TCTGTGAGGGATGCTGGGGGGTT

>2094

ACTTTAATTCTTCCTTACAAGCCTGCCTGTGACTGCCCAGGTCTGTTCTCTGCTTCTAC  
CAAGGGGTAGGCAAGACTAGAATCTGACTTGAGAGCAGTTTCAGATCTTTGTCTGTGA  
GGGATGCTGGGGGGTTTCTGGC

>2095

AATTCTTCCTTACAAGCCTGCCTGTGACTGCCCAGGTCTGTTCTCTGCTTCTACCAAG  
GGGTAGGCAAGACTAGAATCTGACTTGAGAGCAGTTTCAGATCTTTGTCTGTGAGGGA  
TGCTGGGGGGTTTCTGGCATGGT

>2096

TTCCTTACAAGCCTGCCTGTGACTGCCCAGGTCTGTTCTCTGCTTCTACCAAGGGGTA  
GGCAAGACTAGAATCTGACTTGAGAGCAGTTTCAGATCTTTGTCTGTGAGGGATGCTG  
GGGGGTTTCTGGCATGGTGACTT

>2097

CTGCCTGTGACTGCCCAGGTCTGTTCTCTGCTTCTACCAAGGGGTAGGCAAGACTAGA  
ATCTGACTTGAGAGCAGTTTCAGATCTTTGTCTGTGAGGGATGCTGGGGGGTTTCTGGC  
ATGGTGACTTGCTCCTGGGACA

>2098

TCTGCTTCTACCAAGGGGTAGGCAAGACTAGAATCTGACTTGAGAGCAGTTTCAGATC  
TTTGTCTGTGAGGGATGCTGGGGGGTTTCTGGCATGGTGACTTGCTCCTGGGACACT  
CATTAACTCTCTGCTGCTGAGCC

>2099

GCTGGGGGGTTTCTGGCATGGTGACTTGCTCCTGGGACACTCATTAACTCTCTGCTG  
CTGAGCCTGAGCAGACTAATGTACATCAACTCCTTAGGATTTACAGACAATGCCCTATG  
TTGGGGGGTTTGTAGACCCAAAG

>2100

GGGGGGTTTCTGGCATGGTGACTTGCTCCTGGGACACTCATTAACTCTCTGCTGCTG

AGCCTGAGCAGACTAATGTACATCAACTCCTTAGGATTTACAGACAATGCCCTATGTTG  
GGGGTTTTGAGACCCAAAGATT

>2101

TGCCTCTGGGACACTCATTAACCTCTCTGCTGCTGAGCCTGAGCAGACTAATGTACAT  
CAACTCCTTAGGATTTACAGACAATGCCCTATGTTGGGGTTTTGAGACCCAAAGATTG  
CTAAGACATGGGACTTTTCCTT

>2102

AGCCTGAGCAGACTAATGTACATCAACTCCTTAGGATTTACAGACAATGCCCTATGTTG  
GGGGTTTTGAGACCCAAAGATTGCTAAGACATGGGACTTTTCCTTGAAGAGCTTATACT  
TTGAGTTAAATATGTATGTTG

>2103

CAGACTAATGTACATCAACTCCTTAGGATTTACAGACAATGCCCTATGTTGGGGTTTT  
GAGACCCAAAGATTGCTAAGACATGGGACTTTTCCTTGAAGAGCTTATACTTTGAGTTA  
AAATATGTATGTTGATATCTAT

>2104

GTACATCAACTCCTTAGGATTTACAGACAATGCCCTATGTTGGGGTTTTGAGACCCAA  
AGATTGCTAAGACATGGGACTTTTCCTTGAAGAGCTTATACTTTGAGTTAAATATGTAT  
GTTGATATCTATGACAGAGAA

>2105

ATGTTGGGGTTTTGAGACCCAAAGATTGCTAAGACATGGGACTTTTCCTTGAAGAGC  
TTATACTTTGAGTTAAATATGTATGTTGATATCTATGACAGAGAATAGGAAATGGAAAG  
ACTATGATATATATTCAGAG

>2106

TAAGACATGGGACTTTTCCTTGAAGAGCTTATACTTTGAGTTAAATATGTATGTTGATA  
TCTATGACAGAGAATAGGAAATGGAAAGACTATGATATATATTCAGAGTTGAAATGA  
CTTCTGTCTGGAGTGATTCAT

>2107

AGACATGGGACTTTTCCTTGAAGAGCTTATACTTTGAGTTAAATATGTATGTTGATATC  
TATGACAGAGAATAGGAAATGGAAAGACTATGATATATATTCAGAGTTGAAATGACTT  
CTGTCTGGAGTGATTCATTT

>2108

AGTTAAATATGTATGTTGATATCTATGACAGAGAATAGGAAATGGAAAGACTATGATAT  
ATATATTCAGAGTTGAAATGACTTCTGTCTGGAGTGATTCATTTAAATTTTAAACCTT  
GTTGAGCACTTACTGTCTGC

>2109

TTAAATATGTATGTTGATATCTATGACAGAGAATAGGAAATGGAAAGACTATGATATATA  
TATTCAGAGTTGAAATGACTTCTGTCTGGAGTGATTCATTTAAATTTTAAACCTTGT  
GAGCACTTACTGTCTGCTG

>2110

TATGACAGAGAATAGGAAATGGAAAGACTATGATATATATTCAGAGTTGAAATGACTT  
CTGTCTGGAGTGATTCATTTAAATTTTAAACCTTGTGAGCACTTACTGTCTGCTGGG  
CACCTGGGTAGGCCCTGGGA

>2111

ATATATATATTCAGAGTTGAAATGACTTCTGTCTGGAGTGATTCATTTAAATTTTAAAC  
CTTGTGAGCACTTACTGTCTGCTGGCACCTGGGTAGGCCCTGGGAATACTGTGATGA  
GCAAGATAGACAAGACGTCT

>2112

TGTCTGGAGTGATTCATTTTAAATTTTAAAACCTTGTTGAGCACTTACTGTCTGCTGGGC  
ACCTGGGTAGGCCCTGGGAATACTGTGATGAGCAAGATAGACAAGACGTCTACCTCC  
TGGGGCTTTCCTAATGGGGAAG

>2113

ATTTTAAAACCTTGTTGAGCACTTACTGTCTGCTGGGCACCTGGGTAGGCCCTGGGAAT  
ACTGTGATGAGCAAGATAGACAAGACGTCTACCTCCTGGGGCTTTCCTAATGGGGAA  
GAAAGATCCTTACTTAGCTAGCA

>2114

ACCTTGTTGAGCACTTACTGTCTGCTGGGCACCTGGGTAGGCCCTGGGAATACTGTGAT  
GAGCAAGATAGACAAGACGTCTACCTCCTGGGGCTTTCCTAATGGGGAAGAAAGATC  
CTTACTTAGCTAGCAGTCCTGTC

>2115

GTTGAGCACTTACTGTCTGCTGGGCACCTGGGTAGGCCCTGGGAATACTGTGATGAGC  
AAGATAGACAAGACGTCTACCTCCTGGGGCTTTCCTAATGGGGAAGAAAGATCCTTA  
CTTAGCTAGCAGTCCTGTCCGTAA

>2116

GCCCTGGGAATACTGTGATGAGCAAGATAGACAAGACGTCTACCTCCTGGGGCTTTC  
CTAATGGGGAAGAAAGATCCTTACTTAGCTAGCAGTCCTGTCCGTAAGTGTGTAAGGGT  
GATTTTGATACATGTTGGGAGCC

>2117

AGCAAGATAGACAAGACGTCTACCTCCTGGGGCTTTCCTAATGGGGAAGAAAGATCC  
TACTTAGCTAGCAGTCCTGTCCGTAAGTGTGTAAGGGTGATTTTGATACATGTTGGGA  
GCCTGGATGAAGCAGCACATGAG

>2118

AAGATAGACAAGACGTCTACCTCCTGGGGCTTTCCTAATGGGGAAGAAAGATCCTTA  
CTTAGCTAGCAGTCCTGTCCGTAAGTGTGTAAGGGTGATTTTGATACATGTTGGGAGCC  
TGGATGAAGCAGCACATGAGTAG

>2119

CTCCTGGGGCTTTCCTAATGGGGAAGAAAGATCCTTACTTAGCTAGCAGTCCTGTCCGT  
AACTGTGTAAGGGTGATTTTGATACATGTTGGGAGCCTGGATGAAGCAGCACATGAGT  
AGGATATTAAAGGATAAGTAGGT

>2120

AGAAAGATCCTTACTTAGCTAGCAGTCCTGTCCGTAAGTGTGTAAGGGTGATTTTGATA  
CATGTTGGGAGCCTGGATGAAGCAGCACATGAGTAGGATATTAAAGGATAAGTAGGTTT  
TGAAGACGGGGACAGAAAGAAG

>2121

TACTTAGCTAGCAGTCCTGTCCGTAAGTGTGTAAGGGTGATTTTGATACATGTTGGGAG  
CCTGGATGAAGCAGCACATGAGTAGGATATTAAAGGATAAGTAGGTTTGAAGACGGG  
GACAGAAAGAAGGAAAATTGTGG

>2122

TTAGCTAGCAGTCCTGTCCGTAAGTGTGTAAGGGTGATTTTGATACATGTTGGGAGCCT  
GGATGAAGCAGCACATGAGTAGGATATTAAAGGATAAGTAGGTTTGAAGACGGGGAC  
AGAAAGAAGGAAAATTGTGGTCA

>2123

CAGTCCTGTCCGTAAGTGTGTAAGGGTGATTTTGATACATGTTGGGAGCCTGGATGAAG

CAGCACATGAGTAGGATATTAAGGATAAGTAGGTTTTGAAGACGGGGACAGAAAGAA  
GGAAAATTGTGGTCAGGGCCAGG

>2124

AACTGTGTAAGGGTGATTTTGATACATGTTGGGAGCCTGGATGAAGCAGCACATGAGT  
AGGATATTAAGGATAAGTAGGTTTTGAAGACGGGGACAGAAAGAAGGAAAATTGTG  
GTCAGGGCCAGGGGAGAAAACAAGG

>2125

TTGGGAGCCTGGATGAAGCAGCACATGAGTAGGATATTAAGGATAAGTAGGTTTTGA  
AGACGGGGACAGAAAGAAGGAAAATTGTGGTCAGGGCCAGGGGAGAAAACAAGGA  
GTAACTTTCTTTGGCAGGAATGAGGGT

>2126

CCTGGATGAAGCAGCACATGAGTAGGATATTAAGGATAAGTAGGTTTTGAAGACGGG  
GACAGAAAGAAGGAAAATTGTGGTCAGGGCCAGGGGAGAAAACAAGGAGTAACTTT  
CTTTGGCAGGAATGAGGGTGATTCAT

>2127

ACATGAGTAGGATATTAAGGATAAGTAGGTTTTGAAGACGGGGACAGAAAGAAGGA  
AAATTGTGGTCAGGGCCAGGGGAGAAAACAAGGAGTAACTTTCTTTGGCAGGAATGA  
GGGTGATTCATGCTGGAATGGTAGGC

>2128

GTAGGATATTAAGGATAAGTAGGTTTTGAAGACGGGGACAGAAAGAAGGAAAATTGT  
GGTCAGGGCCAGGGGAGAAAACAAGGAGTAACTTTCTTTGGCAGGAATGAGGGTGAT  
TCATGCTGGAATGGTAGGCTGGGGT

>2129

ACGGGGACAGAAAGAAGGAAAATTGTGGTCAGGGCCAGGGGAGAAAACAAGGAGTA  
ACTTTCTTTGGCAGGAATGAGGGTGATTCATGCTGGAATGGTAGGCTGGGGTCAGACT  
GTGGTGCTATAAATGCGGGGAGAGAG

>2130

CAGAAAGAAGGAAAATTGTGGTCAGGGCCAGGGGAGAAAACAAGGAGTAACTTTCTT  
TGGCAGGAATGAGGGTGATTCATGCTGGAATGGTAGGCTGGGGTCAGACTGTGGTGCT  
ATAAATGCGGGGAGAGAGATTAGAG

>2131

AGGGCCAGGGGAGAAAACAAGGAGTAACTTTCTTTGGCAGGAATGAGGGTGATTCAT  
GCTGGAATGGTAGGCTGGGGTCAGACTGTGGTGCTATAAATGCGGGGAGAGAGATTAG  
AGAAGGCAGCATGAAGAATGGAGAG

>2132

AGAAAACAAGGAGTAACTTTCTTTGGCAGGAATGAGGGTGATTCATGCTGGAATGGTA  
GGCTGGGGTCAGACTGTGGTGCTATAAATGCGGGGAGAGAGATTAGAGAAGGCAGCA  
TGAAGAATGGAGAGAAAATGAGTTT

>2133

GCAGGAATGAGGGTGATTCATGCTGGAATGGTAGGCTGGGGTCAGACTGTGGTGCTAT  
AAATGCGGGGAGAGAGATTAGAGAAGGCAGCATGAAGAATGGAGAGAAAATGAGTTT  
GAAGTTGAGCAGACCCGGGTTTCAGA

>2134

AGGAATGAGGGTGATTCATGCTGGAATGGTAGGCTGGGGTCAGACTGTGGTGCTATAA  
ATGCGGGGAGAGAGATTAGAGAAGGCAGCATGAAGAATGGAGAGAAAATGAGTTTGA  
AGTTGAGCAGACCCGGGTTTCAGATT

>2135

GAATGAGGGTGATTCATGCTGGAATGGTAGGCTGGGGTCAGACTGTGGTGCTATAAAT  
GCGGGGAGAGAGATTAGAGAAGGCAGCATGAAGAATGGAGAGAAAATGAGTTTGAA  
GTTGAGCAGACCCGGGTTTCAGATTTT

>2136

AGGGTGATTCATGCTGGAATGGTAGGCTGGGGTCAGACTGTGGTGCTATAAATGCGGG  
GAGAGAGATTAGAGAAGGCAGCATGAAGAATGGAGAGAAAATGAGTTTGAAGTTGAG  
CAGACCCGGGTTTCAGATTTTCATGC

>2137

GAATGGTAGGCTGGGGTCAGACTGTGGTGCTATAAATGCGGGGAGAGAGATTAGAGAA  
GGCAGCATGAAGAATGGAGAGAAAATGAGTTTGAAGTTGAGCAGACCCGGGTTTCAGA  
TTTTTCATGCTGCCACTTGCAAACCTG

>2138

TGGTGCTATAAATGCGGGGAGAGAGATTAGAGAAGGCAGCATGAAGAATGGAGAGAA  
AATGAGTTTGAAGTTGAGCAGACCCGGGTTTCAGATTTTCATGCTGCCACTTGCAAACCT  
GTGTGATGTTGGCCATCAAGGACTG

>2139

GAGAGATTAGAGAAGGCAGCATGAAGAATGGAGAGAAAATGAGTTTGAAGTTGAGCA  
GACCCGGGTTTCAGATTTTCATGCTGCCACTTGCAAACCTGTGTGATGTTGGCCATCAAGG  
ACTGTGAACTGGCTGGGTGCAGTG

>2140

TGAAGTTGAGCAGACCCGGGTTTCAGATTTTCATGCTGCCACTTGCAAACCTGTGTGATG  
TTGGCCATCAAGGACTGTGAACTGGCTGGGTGCAGTGGCTCACACCTGTCATCCCAGT  
GCTTTGGGAGGCCAAGGCAGGAGG

>2141

AGATTTTCATGCTGCCACTTGCAAACCTGTGTGATGTTGGCCATCAAGGACTGTGAACTG  
GCTGGGTGCAGTGGCTCACACCTGTCATCCCAGTGCTTTGGGAGGCCAAGGCAGGAG  
GATTGCGTGAGGCCAGAAGTTTGA

>2142

AACTGTGTGATGTTGGCCATCAAGGACTGTGAACTGGCTGGGTGCAGTGGCTCACAC  
CTGTCATCCCAGTGCTTTGGGAGGCCAAGGCAGGAGGATTGCGTGAGGCCAGAAGTT  
TGAGACTGGCTTGGGCAATATAGCG

>2143

CAAGGACTGTGAACTGGCTGGGTGCAGTGGCTCACACCTGTCATCCCAGTGCTTTGGG  
AGGCCAAGGCAGGAGGATTGCGTGAGGCCAGAAGTTTGGAGACTGGCTTGGGCAATAT  
AGCGAGACGATCTTTCCAAAAA

>2144

GGACTGTGAACTGGCTGGGTGCAGTGGCTCACACCTGTCATCCCAGTGCTTTGGGAGG  
CCAAGGCAGGAGGATTGCGTGAGGCCAGAAGTTTGGAGACTGGCTTGGGCAATATAGC  
GAGACGATCTTTCCAAAAA

>2145

TGGCTGGGTGCAGTGGCTCACACCTGTCATCCCAGTGCTTTGGGAGGCCAAGGCAGG  
AGGATTGCGTGAGGCCAGAAGTTTGGAGACTGGCTTGGGCAATATAGCGAGACGATCTT  
TCCAAAAA

>2146

TGCAGTGGCTCACACCTGTCATCCCAGTGCTTTGGGAGGCCAAGGCAGGAGGATTGCG

TGAGGCCAGAAGTTTGAGACTGGCTTGGGCAATATAGCGAGACGATCTTCCAAAAA  
AAAAAAAAAAAAAATTAATAATGCA

>2147

AGTGCTTTGGGAGGCCAAGGCAGGAGGATTGCGTGAGGCCAGAAGTTTGAGACTGGC  
TTGGGCAATATAGCGAGACGATCTTCCAAAAAATTAATAATGCA  
GCTGTGCATGCCATAATCCCAGCT

>2148

TTGAGACTGGCTTGGGCAATATAGCGAGACGATCTTCCAAAAAATTAATAATGCA  
ATTAATAATGCAGCTGTGCATGCCATAATCCCAGCTTCTCGGGTGGCTGAAGAGGGA  
GGATGGCTTGAACCTATAAGTTCAA

>2149

AGCGAGACGATCTTCCAAAAAATTAATAATGCAGCTGTGCATG  
CCCATAATCCCAGCTTCTCGGGTGGCTGAAGAGGGAGGATGGCTTGAACCTATAAGTTC  
AAGGCTGTGGTGAGCTATGATCAC

>2150

AAAAAAAAAAAAAATTAATAATGCAGCTGTGCATGCCATAATCCCAGCTTCTC  
GGGTGGCTGAAGAGGGAGGATGGCTTGAACCTATAAGTTCAAGGCTGTGGTGAGCTAT  
GATCACGCCACTGCACTCCAGCCT

>2151

AAAAAAAAAAAAAATTAATAATGCAGCTGTGCATGCCATAATCCCAGCTTCTCGG  
GTGGCTGAAGAGGGAGGATGGCTTGAACCTATAAGTTCAAGGCTGTGGTGAGCTATGA  
TCACGCCACTGCACTCCAGCCTGG

>2152

TGCAGCTGTGCATGCCATAATCCCAGCTTCTCGGGTGGCTGAAGAGGGAGGATGGCT  
TGAACCTATAAGTTCAAGGCTGTGGTGAGCTATGATCACGCCACTGCACTCCAGCCTGG  
GCAACAAAGTGAGACCCTATCTC

>2153

AAGAGGGAGGATGGCTTGAACCTATAAGTTCAAGGCTGTGGTGAGCTATGATCACGCC  
ACTGCACTCCAGCCTGGGCAACAAAGTGAGACCCTATCTCTATTTCAAACAACAACA  
ACAACAACAGCAACACACACCATG

>2154

CTTGAACCTATAAGTTCAAGGCTGTGGTGAGCTATGATCACGCCACTGCACTCCAGCCT  
GGGCAACAAAGTGAGACCCTATCTCTATTTCAAACAACAACAACAACAACAGCAAC  
ACACCCATGAACTGTAGCTTCTT

>2155

CCACTGCACTCCAGCCTGGGCAACAAAGTGAGACCCTATCTCTATTTCAAACAACAA  
CAACAACAACAGCAACACACACCATGAACTGTAGCTTCTTCATTCCTACAGTGCAGTT  
ATTGTGTGGGATAGCCTGAGGATT

>2156

ACAAAGTGAGACCCTATCTCTATTTCAAACAACAACAACAACAACAGCAACACACA  
CCATGAACTGTAGCTTCTTCATTCCTACAGTGCAGTTATTGTGTGGGATAGCCTGAGGA  
TTTGGGGTCGTGACTTAACACAC

>2157

TTTCAAACAACAACAACAACAACAGCAACACACACCATGAACTGTAGCTTCTTCATT  
CCTACAGTGCAGTTATTGTGTGGGATAGCCTGAGGATTTGGGGTCGTGACTTAACACA  
CTCTGCACAGTGCCTGTAACAGT

>2158

ACAACAACAGCAACACACACCATGAACTGTAGCTTCTTCATTCTACAGTGCAGTTATT  
GTGTGGGATAGCCTGAGGATTTGGGGTCGTGTACTTAACACACTCTGCACAGTGCCTGT  
AACAGTGTAGTTGCTCAATAAA

>2159

ACAGCAACACACACCATGAACTGTAGCTTCTTCATTCTACAGTGCAGTTATTGTGTGG  
GATAGCCTGAGGATTTGGGGTCGTGTACTTAACACACTCTGCACAGTGCCTGTAACAG  
TGTAGTTGCTCAATAAATAAC

>2160

TCCTACAGTGCAGTTATTGTGTGGGATAGCCTGAGGATTTGGGGTCGTGTACTTAACAC  
ACTCTGCACAGTGCCTGTAACAGTGTAGTTGCTCAATAAATAACTGCTGTTTGTTTTA  
ACTGCTGTTTCTTTTTGGACT

>2161

GTTATTGTGTGGGATAGCCTGAGGATTTGGGGTCGTGTACTTAACACACTCTGCACAGT  
GCCTGTAACAGTGTAGTTGCTCAATAAATAACTGCTGTTTGTTTAACTGCTGTTTCT  
TTTTGGACTTTATCCCGGGAG

>2162

TGTGTGGGATAGCCTGAGGATTTGGGGTCGTGTACTTAACACACTCTGCACAGTGCCT  
GTAACAGTGTAGTTGCTCAATAAATAACTGCTGTTTGTTTAACTGCTGTTTCTTTTT  
GGACTTTATCCCGGGAGAGTTG

>2163

TGTAGTTGCTCAATAAATAACTGCTGTTTGTTTAACTGCTGTTTCTTTTTGGACTTTA  
TCCCGGGAGAGTTGGAGCCTTGGAAGGCATTTGAAAAGGAGAGTGACGTGACTGGAG  
TGCTCCATACTGATGTGACATC

>2164

TAGTTGCTCAATAAATAACTGCTGTTTGTTTAACTGCTGTTTCTTTTTGGACTTTATC  
CCGGGAGAGTTGGAGCCTTGGAAGGCATTTGAAAAGGAGAGTGACGTGACTGGAGTG  
CTCCATACTGATGTGACATCCA

>2165

TTGTTTTAACTGCTGTTTCTTTTTGGACTTTATCCCGGGAGAGTTGGAGCCTTGGAAGG  
CATTTGAAAAGGAGAGTGACGTGACTGGAGTGCTCCATACTGATGTGACATCCACTAG  
GCATGTGTCTGACTGCCCCCTGC

>2166

TTTTTGGACTTTATCCCGGGAGAGTTGGAGCCTTGGAAGGCATTTGAAAAGGAGAGTG  
ACGTGACTGGAGTGCTCCATACTGATGTGACATCCACTAGGCATGTGTCTGACTGCCCC  
CTGCTCCTTCCCTGCCTTCACGA

>2167

AGCCTTGGAAGGCATTTGAAAAGGAGAGTGACGTGACTGGAGTGCTCCATACTGATGT  
GACATCCACTAGGCATGTGTCTGACTGCCCCCTGCTCCTTCCCTGCCTTCACGAGCCTG  
TCTGAAAAGGAGTTTAGTGCGTG

>2168

GCTCCATACTGATGTGACATCCACTAGGCATGTGTCTGACTGCCCCCTGCTCCTTCCCT  
GCCTTCACGAGCCTGTCTGAAAAGGAGTTAGTGCGTGATCATCAGCTCCTAAGGAGA  
CCTCTCCCCTGTATCTTGACCT

>2169

GTGACATCCACTAGGCATGTGTCTGACTGCCCCCTGCTCCTTCCCTGCCTTCACGAGCC

TGCTGAAAAGGAGTTTAGTGCCTGATCATCAGCTCCTAAGGAGACCTCTCCCCTGTAT  
CTTGACCTGGCACTCTACCAA

>2170

CTGACTGCCCCCTGCTCCTTCCCTGCCTTACGAGCCTGTCTGAAAAGGAGTTTAGTG  
CGTGATCATCAGCTCCTAAGGAGACCTCTCCCCTGTATCTTGACCTGGCACTCTACCA  
AGATTTGATGAAAGGACATGAAA

>2171

CCCCTGCTCCTTCCCTGCCTTACGAGCCTGTCTGAAAAGGAGTTTAGTGCCTGATCAT  
CAGCTCCTAAGGAGACCTCTCCCCTGTATCTTGACCTGGCACTCTACCAAGATTTGAT  
GAAAGGACATGAAATGGACCCT

>2172

CTGCTCCTTCCCTGCCTTACGAGCCTGTCTGAAAAGGAGTTTAGTGCCTGATCATCAG  
CTCCTAAGGAGACCTCTCCCCTGTATCTTGACCTGGCACTCTACCAAGATTTGATGAA  
AGGACATGAAATGGACCCTTGC

>2173

AGTTTAGTGCCTGATCATCAGCTCCTAAGGAGACCTCTCCCCTGTATCTTGACCTGGC  
ACTCTACCAAGATTTGATGAAAGGACATGAAATGGACCCTTGCCACCTCTCGGTGGGC  
GGGAAGCTGGGAGAGGGGCCTG

>2174

GATCATCAGCTCCTAAGGAGACCTCTCCCCTGTATCTTGACCTGGCACTCTACCAAGA  
TTTGATGAAAGGACATGAAATGGACCCTTGCCACCTCTCGGTGGGCGGGGAAGCTGG  
GAGAGGGGCCTGGGAGAGGGGGT

>2175

CTGGCACTCTACCAAGATTTGATGAAAGGACATGAAATGGACCCTTGCCACCTCTCGG  
TGGGCGGGGAAGCTGGGAGAGGGGCCTGGGAGAGGGGGTCTTACCTGTCAGGAT  
CAAAGGAAGTGACACTCTGAAGCTGG

>2176

TCTACCAAGATTTGATGAAAGGACATGAAATGGACCCTTGCCACCTCTCGGTGGGCGG  
GGAAGCTGGGAGAGGGGCCTGGGAGAGGGGGTCTTACCTGTCAGGATCAAAGGA  
AGTGACACTCTGAAGCTGGTCTGCCG

>2177

AAATGGACCCTTGCCACCTCTCGGTGGGCGGGGAAGCTGGGAGAGGGGCCTGGGGAG  
AGGGGGTCTTACCTGTCAGGATCAAAGGAAGTGACACTCTGAAGCTGGTCTGCCGG  
ACTGTTACCGTCTCTCTAACTCTCT

>2178

CCCTTGCCACCTCTCGGTGGGCGGGGAAGCTGGGAGAGGGGCCTGGGAGAGGGGG  
TCTTACCTGTCAGGATCAAAGGAAGTGACACTCTGAAGCTGGTCTGCCGGACTGTTA  
CCCGTCTCTCTAACTCTCTTTAATA

>2179

CTCGGTGGGCGGGGAAGCTGGGAGAGGGGCCTGGGAGAGGGGGTCTTACCTGTC  
AGGATCAAAGGAAGTGACACTCTGAAGCTGGTCTGCCGGACTGTTACCGTCTCTCTA  
ACTCTCTTTAATAGAAACCCAGTCT

>2180

ATCAAAGGAAGTGACACTCTGAAGCTGGTCTGCCGGACTGTTACCGTCTCTCTAACT  
CTCTTTAATAGAAACCCAGTCTCCCCTTGCCTCCCTGATAGTAACAGCGACGCTA  
TCTCCCGGGCCAGTCTCGGCT



>2181

AAGTGACACTCTGAAGCTGGTCTGCCGACTGTTACCCGTCTCTCTAACTCTCTTTTAA  
TAGAAACCCAGTCTCCCCTCTTGCCCTCCCTGATAGTGAACAGCGACGCTATCTCCCGCG  
GGCCAGTCTCGGCTGTGGTCGT

>2182

CCGACTGTTACCCGTCTCTCTAACTCTCTTTAATAGAAACCCAGTCTCCCCTCTTGCC  
TCCCTGATAGTGAACAGCGACGCTATCTCCCGCGGGCCAGTCTCGGCTGTGGTCGTAG  
CACTACGCAATGTCTGCAAACC

>2183

GTTACCCGTCTCTCTAACTCTCTTTAATAGAAACCCAGTCTCCCCTCTTGCCCTCCCTGA  
TAGTGAACAGCGACGCTATCTCCCGCGGGCCAGTCTCGGCTGTGGTCGTAGCACTACG  
CAATGTCTGCAAACCGACAGTG

>2184

TTAATAGAAACCCAGTCTCCCCTCTTGCCCTCCCTGATAGTGAACAGCGACGCTATCTC  
CCGCGGGCCAGTCTCGGCTGTGGTCGTAGCACTACGCAATGTCTGCAAACCGACAGTG  
GCATGGGGAGATAAGGGCCCAA

>2185

TCCCCTCTTGCCCTCCCTGATAGTGAACAGCGACGCTATCTCCCGCGGGCCAGTCTCGGC  
TGTGGTCGTAGCACTACGCAATGTCTGCAAACCGACAGTGGCATGGGGAGATAAGGGC  
CCAACGTTGTGTAACGAGGGGC

>2186

AGCGACGCTATCTCCCGCGGGCCAGTCTCGGCTGTGGTCGTAGCACTACGCAATGTCT  
GCAAACCGACAGTGGCATGGGGAGATAAGGGCCCAAACGTTGTGTAACGAGGGGCAT  
GGGCTGTTTGCCCGAGTGGCTCCTG

>2187

TCCCGCGGGCCAGTCTCGGCTGTGGTCGTAGCACTACGCAATGTCTGCAAACCGACAG  
TGGCATGGGGAGATAAGGGCCCAAACGTTGTGTAACGAGGGGCATGGGCTGTTTGCCC  
GAGTGGCTCCTGGCCCCTGGGTAA

>2188

GTAGCACTACGCAATGTCTGCAAACCGACAGTGGCATGGGGAGATAAGGGCCCAAAC  
GTTGTGTAACGAGGGGCATGGGCTGTTTGCCCGAGTGGCTCCTGGCCCCTGGGTAAC  
GCTAACCTCAACGAGGAGCGGGCC

>2189

AACCGACAGTGGCATGGGGAGATAAGGGCCCAAACGTTGTGTAACGAGGGGCATGGG  
CTGTTTGCCCGAGTGGCTCCTGGCCCCTGGGTAACCTCAACCTCAACGAGGAGCGG  
GCCGGCCTTGAAACGCCGTTCCAG

>2190

TGTAACGAGGGGCATGGGCTGTTTGCCCGAGTGGCTCCTGGCCCCTGGGTAACCTGCTA  
ACCTCAACGAGGAGCGGGCCGGCCTTGAAACGCCGTTCCAGGGCCCCTCGCTGGT  
TCCACGGATGCCTTTTTGTGGTTGG

>2191

TGGCTCCTGGCCCCTGGGTAACCTGCTAACCTCAACGAGGAGCGGGCCGGCCTTGGA  
AACGCCGTTCCAGGGCCCCTCGCTGGTTCCACGGATGCCTTTTTGTGGTTGGATAAAG  
GAAGCTCATGTAGGCCGCCACAGC

>2192

GCCGGCCTTGAAACGCCGTTCCAGGGCCCCTCGCTGGTTCCACGGATGCCTTTTTGT

GGTTGGATAAAGGAAGCTCATGTAGGCCGCCACAGCGCAGCATGGCCTTGGGCTACG  
GGTGTGGTTGTTTGTCTTTCT

>2193

GCCTTGAAACGCCGTTCCAGGGCCCCTCGCTGGTTCACGGATGCCTTTTTGTGGTT  
GGATAAAGGAAGCTCATGTAGGCCGCCACAGCGCAGCATGGCCTTGGGCTACGGGTG  
TTTGGTTGTTTGTCTTTCTCTT

>2194

GGGCCCTCGCTGGTTCACGGATGCCTTTTTGTGGTTGGATAAAGGAAGCTCATGTAG  
GCCGCCACAGCGCAGCATGGCCTTGGGCTACGGGTGTTGGTTGTTTGTCTTTCTCT  
TTCTTTGTCTTTTTTAAAAA

>2195

CAGCATGGCCTTGGGCTACGGGTGTTGGTTGTTTGTCTTTCTTTCTTTGTCTTTT  
TAAAAAAGAAGTTGAAAGGGGATAGTCTTGCTTGGCACCTACCACCTTAACCCA  
AAACCAATAAAACAAACAGTT

>2196

CATGGCCTTGGGCTACGGGTGTTGGTTGTTTGTCTTTCTTTGTCTTTTTTAA  
AAAAAGAAGTTGAAAGGGGATAGTCTTGCTTGGCACCTACCACCTTAACCCAAAAC  
CAAATAAAACAAACAGTTCT

>2197

CGGGTGTGGTTGTTTGTCTTTCTTTGTCTTTTTAAAAAAGAAGTTGAA  
AGGGGATAGTCTTGCTTGGCACCTACCACCTTAACCCAAAACCAAATAAAACAAAC  
AGTTCCTAAATATAAATTAAC

>2198

AGAAGTTGAAAGGGGATAGTCTTGCTTGGCACCTACCACCTTAACCCAAAACAAA  
TAAACAAACAGTTCTAAATATAAATAAAGTTCACCTGCAGTATAGACATCCTCCT  
CCCTGCCCGAAACCCACTGGCC

>2199

CCTACCACCTTTAACCCAAAACCAAATAAAACAAACAGTTCTAAATATAAATAAAGT  
TCAACCTGCAGTATAGACATCCTCCTCCCTGCCCGAAACCCACTGGCCACTGGAGGCT  
AGCTTTAAGAAATTGTTTTGG

>2200

CACCTTTAACCCAAAACCAAATAAAACAAACAGTTCTAAATATAAATAAAGTTCAC  
CTGCAGTATAGACATCCTCCTCCCTGCCCGAAACCCACTGGCCACTGGAGGCTAGCTT  
TAAGAAATTGGTTTTGGAGACT

>2201

ATATAAATAAAGTTCACCTGCAGTATAGACATCCTCCTCCCTGCCCGAAACCCACT  
GGCCACTGGAGGCTAGCTTTAAGAAATTGTTTTGGAGACTCTGGCTTGAAAAGGAGC  
CATGCCCACTTGTCTCACGTCCC

>2202

AATTAAGTTCACCTGCAGTATAGACATCCTCCTCCCTGCCCGAAACCCACTGGCCA  
CTGGAGGCTAGCTTTAAGAAATTGTTTTGGAGACTCTGGCTTGAAAAGGAGCCATGC  
CCTTGTCTCACGTCCCAGTCG

>2203

TAGACATCCTCCTCCCTGCCCGAAACCCACTGGCCACTGGAGGCTAGCTTTAAGAAA  
TTGTTTTGGAGACTCTGGCTTGAAAAGGAGCCATGCCCACTTGTCTCACGTCCCAGT  
CGCTGGCTCCAGGGGGCCGTGGTA

>2204

TAGCTTTAAGAAATTGGTTTTGGAGACTCTGGCTTGAAAAGGAGCCATGCCCACTTGT  
CTCACGTCCCAGTCGCTGGCTCCAGGGGGCCGTGGTAGAACATATATTGACTTCAGCT  
GCCTTTCCCCTCCAAGCTTCCTC

>2205

TTGGTTTTGGAGACTCTGGCTTGAAAAGGAGCCATGCCCACTTGTCTCACGTCCCAGT  
CGCTGGCTCCAGGGGGCCGTGGTAGAACATATATTGACTTCAGCTGCCTTTCCCCTCC  
AAGCTTCCTCAGCCACCCACAGC

>2206

CATGCCCACTTGTCTCACGTCCCAGTCGCTGGCTCCAGGGGGCCGTGGTAGAACATATA  
TTGACTTCAGCTGCCTTTCCCCTCCAAGCTTCCTCAGCCACCCACAGCCCTTCAGAT  
GAGCTGAGCCCTAGCACTGTGC

>2207

GTCCCAGTCGCTGGCTCCAGGGGGCCGTGGTAGAACATATATTGACTTCAGCTGCCTT  
TCCCCTCCAAGCTTCCTCAGCCACCCACAGCCCTTCAGATGAGCTGAGCCCTAGCAC  
TGTGCCCTCTCCCCTCTGCCCTC

>2208

GGGGGCCGTGGTAGAACATATATTGACTTCAGCTGCCTTTCCCCTCCAAGCTTCCTCA  
GCCACCCACAGCCCTTCAGATGAGCTGAGCCCTAGCACTGTGCCCTCTCCCCTCTGC  
CCTTTAGGGTGATAGAATCCAC

>2209

AACATATATTGACTTCAGCTGCCTTTCCCCTCCAAGCTTCCTCAGCCACCCACAGCCC  
TTTCAGATGAGCTGAGCCCTAGCACTGTGCCCTCTCCCCTCTGCCCTTTAGGGTGATA  
GAATCCACTACCCTGACATCTG

>2210

ATATTGACTTCAGCTGCCTTTCCCCTCCAAGCTTCCTCAGCCACCCACAGCCCTTTCA  
GATGAGCTGAGCCCTAGCACTGTGCCCTCTCCCCTCTGCCCTTTAGGGTGATAGAATC  
CACTACCCTGACATCTGGGGTT

>2211

TACTTCAGCTGCCTTTCCCCTCCAAGCTTCCTCAGCCACCCACAGCCCTTCAGATGAG  
CTGAGCCCTAGCACTGTGCCCTCTCCCCTCTGCCCTTTAGGGTGATAGAATCCACTAC  
CCTGACATCTGGGGTTGCCCTG

>2212

CTCAGCCACCCACAGCCCTTCAGATGAGCTGAGCCCTAGCACTGTGCCCTCTCCCCT  
CTGCCCTTTAGGGTGATAGAATCCACTACCCTGACATCTGGGGTTGCCCTGTTCTGCT  
GTGGTGGGAGATGGGCTGGAAGG

>2213

TCTGCCCTTTAGGGTGATAGAATCCACTACCCTGACATCTGGGGTTGCCCTGTTCTGC  
TGTGGTGGGAGATGGGCTGGAAGGGACTTCGGAGGCTCTCCCGTGTCTGTACCACCC  
AGCTTCCCCTTGATCCCTCCAC

>2214

GGGTGATAGAATCCACTACCCTGACATCTGGGGTTGCCCTGTTCTGCTGTGGTGGGAGA  
TGGGCTGGAAGGGACTTCGGAGGCTCTCCCGTGTCTGTACCACCCAGCTTCCCCTTG  
GATCCCTCCACCCCGCAGCCAG

>2215

TCCACTACCCTGACATCTGGGGTTGCCCTGTTCTGCTGTGGTGGGAGATGGGCTGGAA

GGGACTTCGGAGGCTCTCCCGTGTCTGTACCACCCAGCTTCCCCTTGGATCCCTCCAC  
CCCCGAGCCAGGAGAGGGAAGT

>2216

CCTGTTCTGCTGTGGTGGGAGATGGGCTGGAAGGGACTTCGGAGGCTCTCCCGTGTTC  
TGACCACCCAGCTTCCCCTTGGATCCCTCCACCCCCGAGCCAGGAGAGGGAAGTAA  
CTGTTCTTTGAGCAGGACATTTCA

>2217

GAAGGGACTTCGGAGGCTCTCCCGTGTCTGTACCACCCAGCTTCCCCTTGGATCCCTC  
CACCCCCGAGCCAGGAGAGGGAAGTAACTGTTCTTTGAGCAGGACATTTCAATTTCA  
AAGTATTCTTGATGCCGCCCCC

>2218

GGACTTCGGAGGCTCTCCCGTGTCTGTACCACCCAGCTTCCCCTTGGATCCCTCCACC  
CCCCGAGCCAGGAGAGGGAAGTAACTGTTCTTTGAGCAGGACATTTCAATTTCAAAGT  
ATTCTTGATGCCGCCCCCCCCGCC

>2219

CTTCGGAGGCTCTCCCGTGTCTGTACCACCCAGCTTCCCCTTGGATCCCTCCACCCCC  
GCAGCCAGGAGAGGGAAGTAACTGTTCTTTGAGCAGGACATTTCAATTTCAAAGTATT  
CTTGATGCCGCCCCCCCCGCCCA

>2220

TCGGAGGCTCTCCCGTGTCTGTACCACCCAGCTTCCCCTTGGATCCCTCCACCCCCGC  
AGCCAGGAGAGGGAAGTAACTGTTCTTTGAGCAGGACATTTCAATTTCAAAGTATTCTT  
GATGCCGCCCCCCCCGCCACC

>2221

TGTACCACCCAGCTTCCCCTTGGATCCCTCCACCCCCGAGCCAGGAGAGGGAAGTAA  
CTGTTCTTTGAGCAGGACATTTCAATTTCAAAGTATTCTTGATGCCGCCCCCCCCGCC  
ACCGCCAAGAATTCTGCTCTGTG

>2222

GGATCCCTCCACCCCCGAGCCAGGAGAGGGAAGTAACTGTTCTTTGAGCAGGACATT  
TCATTTCAAAGTATTCTTGATGCCGCCCCCCCCGCCACCAGCAAGAATTCTGCTCTG  
TGGGTGATACTTATAAGGTAAGTAACT

>2223

AACTGTTCTTTGAGCAGGACATTTCAATTTCAAAGTATTCTTGATGCCGCCCCCCCCGCC  
CCACCGCAAGAATTCTGCTCTGTGGGTGATACTTATAAGGTAAGTAACTATATGGCTTCCTTA  
TTAGGCAGCAGTTTCTCTTC

>2224

TCAAAGTATTCTTGATGCCGCCCCCCCCGCCACCAGCAAGAATTCTGCTCTGTGGGTG  
ATACTTATAAGGTAAGTAACTATATGGCTTCCTTATTTAGGCAGCAGTTTCTCTCTATGATTT  
AGTTCCTCTCATGATTCTTA

>2225

CCGCCCCACCGCAAGAATTCTGCTCTGTGGGTGATACTTATAAGGTAAGTAACTATATGGCTT  
CCTTATTTAGGCAGCAGTTTCTCTCTATGATTTAGTTCCTCTCATGATTCTTATAACCC  
TCTCTCAGATACTCCAGG

>2226

CCCACCGCAAGAATTCTGCTCTGTGGGTGATACTTATAAGGTAAGTAACTATATGGCTTCCTT  
ATTTAGGCAGCAGTTTCTCTCTATGATTTAGTTCCTCTCATGATTCTTATAACCCCTCTC  
TCAGATACTCCAGGATGA

>2227

GTGGGTGACTTATAAGGTAACATATGGCTTCTTATTTAGGCAGCAGTTTCTTCTA  
TGATTTTAGTTCCTCTCATGATTCTTATAACCCTCTCTCAGATACTTCCAGGATGATAAAT  
CTTCTATCACTGTTTCAT

>2228

TCCTTATTTAGGCAGCAGTTTCTTCTATGATTTTAGTTCCTCTCATGATTCTTATAACC  
CTCTCTCAGATACTTCCAGGATGATAAATCTTCTATCACTGTTTCATCTGATCACATCAG  
GGTGATTATATTCGTGAC

>2229

GGCAGCAGTTTCTTCTATGATTTTAGTTCCTCTCATGATTCTTATAACCCTCTCAGA  
TACTTCCAGGATGATAAATCTTCTATCACTGTTTCATCTGATCACATCAGGGTGATTATAT  
TTCGTGACATAACCAGGT

>2230

TCTTATAACCCTCTCTCAGATACTTCCAGGATGATAAATCTTCTATCACTGTTTCATCTGA  
TCACATCAGGGTGATTATATTCGTGACATAACCAGGTGGCTTTAATCCGTTGGTGAA  
GAACCAGGCTCTCACCTCCA

>2231

AGGATGATAAATCTTCTATCACTGTTTCATCTGATCACATCAGGGTGATTATATTCGTGA  
CATAACCAGGTGGCTTTAATCCGTTGGTGGAAGAACCAGGCTCTCACCTCCATTGTTTA  
AGATGTTATGTTTCTACTAA

>2232

TTTCATCTGATCACATCAGGGTGATTATATTCGTGACATAACCAGGTGGCTTTAATCCG  
TTGGTGGAAGAACCAGGCTCTCACCTCCATTGTTAAGATGTTATGTTTCTACTAATCTG  
TCCACTGAGTGTCTCCATCC

>2233

CTGATCACATCAGGGTGATTATATTCGTGACATAACCAGGTGGCTTTAATCCGTTGGTG  
GAAGAACCAGGCTCTCACCTCCATTGTTAAGATGTTATGTTTCTACTAATCTGTCCACT  
GAGTGTCTCCATCCTATTGT

>2234

ATTTCTGACATAACCAGGTGGCTTTAATCCGTTGGTGGAAGAACCAGGCTCTCACCTC  
CATTGTTAAGATGTTATGTTTCTACTAATCTGTCCACTGAGTGTCTCCATCCTATTGTTT  
CCATTGCATGCTCTCAGGTT

>2235

GTTGGTGGAAGAACCAGGCTCTCACCTCCATTGTTAAGATGTTATGTTTCTACTAATCT  
GTCCACTGAGTGTCTCCATCCTATTGTTCCATTGCATGCTCTCAGGTTATTTCTTTGTT  
CTTGGCTGTCTGATTGCTC

>2236

AAGATGTTATGTTTCTACTAATCTGTCCACTGAGTGTCTCCATCCTATTGTTTCCATTGCA  
TGCTCTCAGGTTATTTCTTTGTTCTTGGCTGTCTGATTGCTCCAGAGGCTGCAGTTAT  
TTATTTTATTTATTTTCAT

>2237

TCCATCCTATTGTTTCCATTGCATGCTCTCAGGTTATTTCTTTGTTCTTGGCTGTCTGAT  
TGCTCCCAGAGGCTGCAGTTATTTATTTTATTTATTTTCATTTTTGGTGGGAGTAGGGG  
ATTGATCTCTCTTGCCT

>2238

CATCCTATTGTTTCCATTGCATGCTCTCAGGTTATTTCTTTGTTCTTGGCTGTCTGATTG

CTCCCAGAGGCTGCAGTTATTTTATTTTATTTATTTTATTTTATTTTATTTTGGTGGGAGTAGGGGATT  
GATCTCTCTCTGCCTTT

>2239

TTCTTGGCTGTCTGATTGCTCCCAGAGGCTGCAGTTATTTTATTTTATTTATTTTATTTTATTTT  
TGGTGGGAGTAGGGGATTGATCTCTCTCTGCCTTTAGCTTGAATGGGTGGTCATTTCC  
AGGCTTACACATTGCTCCAT

>2240

TGCAGTTATTTTATTTTATTTTATTTTATTTTATTTTATTTTATTTTATTTTATTTTATTTT  
TGCCTTTAGCTTGAATGGGTGGTCATTTCCAGGCTTACACATTGCTCCATGCCCACTGTA  
GGGGTCTGGCTTAGAGATG

>2241

TTCATTTTTTGGTGGGAGTAGGGGATTGATCTCTCTCTGCCTTTAGCTTGAATGGGTGG  
TCATTTCCAGGCTTACACATTGCTCCATGCCCACTGTAGGGGTCTGGCTTAGAGATGGT  
CGGGGGAGAGAAGGTGGTGAT

>2242

TCTCTCTCTGCCTTTAGCTTGAATGGGTGGTCATTTCCAGGCTTACACATTGCTCCATG  
CCCACTGTAGGGGTCTGGCTTAGAGATGGTCGGGGGAGAGAAGGTGGTGATTTAAAA  
GATTTGGAGGCGGTGGCTTACAT

>2243

TTTAGCTTGAATGGGTGGTCATTTCCAGGCTTACACATTGCTCCATGCCCACTGTAGGG  
GTCTGGCTTAGAGATGGTCGGGGGAGAGAAGGTGGTGATTTAAAAGATTTGGAGGCG  
GTGGCTTACATTGATTTAGCTTA

>2244

GTCATTTCCAGGCTTACACATTGCTCCATGCCCACTGTAGGGGTCTGGCTTAGAGATGG  
TCGGGGGAGAGAAGGTGGTGATTTAAAAGATTTGGAGGCGGTGGCTTACATTGATTTT  
AGCTTATCTAACCTTTAGCTAG

>2245

CATTGCTCCATGCCCACTGTAGGGGTCTGGCTTAGAGATGGTCGGGGGAGAGAAGGTG  
GTGATTTAAAAGATTTGGAGGCGGTGGCTTACATTGATTTTAGCTTATCTAACCTTTAG  
CTAGAGGCTGCTTCCCTCAG

>2246

CATGCCCACTGTAGGGGTCTGGCTTAGAGATGGTCGGGGGAGAGAAGGTGGTGATTTA  
AAAGATTTGGAGGCGGTGGCTTACATTGATTTTAGCTTATCTAACCTTTAGCTAGAGG  
CTGCTTCCCTCAGAGTGCCA

>2247

TTAGAGATGGTCGGGGGAGAGAAGGTGGTGATTTAAAAGATTTGGAGGCGGTGGCTTA  
CATTGATTTTAGCTTATCTAACCTTTAGCTAGAGGCTGCTTCCCTCAGAGTGCCAA  
CTAGCTGTAACCTAAAGCAACA

>2248

AGAGAAGGTGGTGATTTAAAAGATTTGGAGGCGGTGGCTTACATTGATTTTAGCTTATC  
TAACCTTTAGCTAGAGGCTGCTTCCCTCAGAGTGCCAACCTAGCTGTAACCTAAAG  
CAACAGAGAAATGTATATCATC

>2249

ATTTGGAGGCGGTGGCTTACATTGATTTTAGCTTATCTAACCTTTAGCTAGAGGCTGCT  
CTTCCCTCAGAGTGCCAACCTAGCTGTAACCTAAAGCAACAGAGAAATGTATATCATCC  
CTTTTCTGCATTAATTAGGG

>2250

TTGGAGGCGGTGGCTTACATTGATTTTAGCTTATCTAACCCCTTAGCTAGAGGCTGCTCT  
TCCCTCAGAGTGTCCAACCTAGCTGTAACCTAAAGCAACAGAGAAATGTATATCATCCCT  
TTTCTTGCAATTAATTAGGGCT

>2251

TTTAGCTTATCTAACCCCTTAGCTAGAGGCTGCTCTTCCCTCAGAGTGTCCAACCTAGCT  
GTAACCTAAAGCAACAGAGAAATGTATATCATCCCTTTTCTTGCAATTAATTAGGGCTGAG  
AAATTCATTATTTAGAGGGAT

>2252

AGAGTGTCCAACCTAGCTGTAACCTAAAGCAACAGAGAAATGTATATCATCCCTTTTCTT  
GCATTAATTAGGGCTGAGAAATTCATTATTTAGAGGGATAAGAGCTCCGGAGGAGGAG  
GGTTTTTTGAACTAATGTAGAGA

>2253

CCAACCTAGCTGTAACCTAAAGCAACAGAGAAATGTATATCATCCCTTTTCTTGCAATTA  
TAGGGCTGAGAAATTCATTATTTAGAGGGATAAGAGCTCCGGAGGAGGAGGGTTTTTT  
GAACTAATGTAGAGATCTGTGG

>2254

CAGAGAAATGTATATCATCCCTTTTCTTGCAATTAATTAGGGCTGAGAAATTCATTATTTAG  
AGGGATAAGAGCTCCGGAGGAGGAGGGTTTTTTGAACTAATGTAGAGATCTGTGGCCA  
GCTGTGTGATTCTCAGGTAGC

>2255

TATATCATCCCTTTTCTTGCAATTAATTAGGGCTGAGAAATTCATTATTTAGAGGGATAAGA  
GCTCCGGAGGAGGAGGGTTTTTTGAACTAATGTAGAGATCTGTGGCCAGCTGTGTGAT  
TCTCAGGTAGCAGGTGAGGGG

>2256

ATCATCCCTTTTCTTGCAATTAATTAGGGCTGAGAAATTCATTATTTAGAGGGATAAGAGC  
TCCGGAGGAGGAGGGTTTTTTGAACTAATGTAGAGATCTGTGGCCAGCTGTGTGATTC  
TCAGGTAGCAGGTGAGGGGGTG

>2257

TAGGGCTGAGAAATTCATTATTTAGAGGGATAAGAGCTCCGGAGGAGGAGGGTTTTTT  
GAACTAATGTAGAGATCTGTGGCCAGCTGTGTGATTCTCAGGTAGCAGGTGAGGGGGT  
GGGGGTTGATGAGAGGGGGTGAGAA

>2258

TCATTATTTAGAGGGATAAGAGCTCCGGAGGAGGAGGGTTTTTTGAACTAATGTAGAGA  
TCTGTGGCCAGCTGTGTGATTCTCAGGTAGCAGGTGAGGGGGTGGGGGTTGATGAGAG  
GGGTGAGAAGGAGCAGGTGCCAG

>2259

GAGCTCCGGAGGAGGAGGGTTTTTTGAACTAATGTAGAGATCTGTGGCCAGCTGTGTG  
ATTCTCAGGTAGCAGGTGAGGGGGTGGGGGTTGATGAGAGGGGTGAGAAGGAGCAGG  
TGCCAGGGTCAGGCAGGGGAGGGAG

>2260

CTCCGGAGGAGGAGGGTTTTTTGAACTAATGTAGAGATCTGTGGCCAGCTGTGTGATT  
CTCAGGTAGCAGGTGAGGGGGTGGGGGTTGATGAGAGGGGTGAGAAGGAGCAGGTG  
CCAGGGTCAGGCAGGGGAGGGAGCCC

>2261

GAGGAGGAGGGTTTTTTGAACTAATGTAGAGATCTGTGGCCAGCTGTGTGATTCTCAG

GTAGCAGGTGAGGGGGTGGGGTTGATGAGAGGGGTGAGAAGGAGCAGGTGCCAGG  
GTCAGGCAGGGGAGGGAGCCCCACT

>2262

AACTAATGTAGAGATCTGTGGCCAGCTGTGTGATTCTCAGGTAGCAGGTGAGGGGGT  
GGGGTTGATGAGAGGGGTGAGAAGGAGCAGGTGCCAGGGTCAGGCAGGGGAGGGAG  
CCCCACTCCGTGCATCATCCCAGAG

>2263

TGGCCAGCTGTGTGATTCTCAGGTAGCAGGTGAGGGGGTGGGGTTGATGAGAGGGG  
TGAGAAGGAGCAGGTGCCAGGGTCAGGCAGGGGAGGGAGCCCCACTCCGTGCATCA  
TCCCAGAGCCCTGTTCTCCAAGCCC

>2264

CTCAGGTAGCAGGTGAGGGGGTGGGGTTGATGAGAGGGGTGAGAAGGAGCAGGTG  
CCAGGGTCAGGCAGGGGAGGGAGCCCCACTCCGTGCATCATCCCAGAGCCCTGTT  
CTCCAAGCCCAGATTAGACACCCTTCT

>2265

GTAGCAGGTGAGGGGGTGGGGTTGATGAGAGGGGTGAGAAGGAGCAGGTGCCAGG  
GTCAGGCAGGGGAGGGAGCCCCACTCCGTGCATCATCCCAGAGCCCTGTTCTCCAA  
GCCAGATTAGACACCCTTCTCCACG

>2266

CAGGTGAGGGGGTGGGGTTGATGAGAGGGGTGAGAAGGAGCAGGTGCCAGGGTCA  
GGCAGGGGAGGGAGCCCCACTCCGTGCATCATCCCAGAGCCCTGTTCTCCAAGCCC  
AGATTAGACACCCTTCTCCACGTGGG

>2267

AGAGGGGTGAGAAGGAGCAGGTGCCAGGGTCAGGCAGGGGAGGGAGCCCCACTCC  
GTGCATCATCCCAGAGCCCTGTTCTCCAAGCCCAGATTAGACACCCTTCTCCACGTGG  
GGCCTCAAGTTAGAAATCCTGGGAG

>2268

GGTCAGGCAGGGGAGGGAGCCCCACTCCGTGCATCATCCCAGAGCCCTGTTCTCCA  
AGCCCAGATTAGACACCCTTCTCCACGTGGGGCCTCAAGTTAGAAATCCTGGGAGGAG  
GCCTTATTGCTCAGGATCATCTGG

>2269

CCGTGCATCATCCCAGAGCCCTGTTCTCCAAGCCCAGATTAGACACCCTTCTCCACGT  
GGGGCCTCAAGTTAGAAATCCTGGGAGGAGGCCTTATTGCTCAGGATCATCTGGGAAT  
GTTGCTTTCTGGGTTAAAATAC

>2270

GCATCATCCCAGAGCCCTGTTCTCCAAGCCCAGATTAGACACCCTTCTCCACGTGGG  
GCCTCAAGTTAGAAATCCTGGGAGGAGGCCTTATTGCTCAGGATCATCTGGGAATGTTG  
CTTTCTGGGTTAAAATACAGTC

>2271

CCCAGATTAGACACCCTTCTCCACGTGGGGCCTCAAGTTAGAAATCCTGGGAGGAGGC  
CTTATTGCTCAGGATCATCTGGGAATGTTGCTTTCTGGGTTAAAATACAGTCAATGTTT  
AGATGAGCTGCTGTTCAAGCAC

>2272

AGAAATCCTGGGAGGAGGCCTTATTGCTCAGGATCATCTGGGAATGTTGCTTTCTGGGT  
TAAAATACAGTCAATGTTTAGATGAGCTGCTGTTCAAGGCACATGGTCTGGTTAGCAA  
GGGTTAAATCCTGCATCCCGTT



>2273

GAGGAGGCCTTATTGCTCAGGATCATCTGGGAATGTTGCTTTCTGGGTTTAAAATACAG  
TCAATGTTTAGATGAGCTGCTGTTACAGGCACATGGTCTGGTTAGCAAAGGGTTAAATCC  
TGCATCCCGTTTTTAGTCATCA

>2274

TCAGGATCATCTGGGAATGTTGCTTTCTGGGTTTAAAATACAGTCAATGTTTAGATGAG  
CTGCTGTTACAGGCACATGGTCTGGTTAGCAAAGGGTTAAATCCTGCATCCCGTTTTTAG  
TCATCAAGCTAGCTCAGATCTG

>2275

TGTTGCTTTCTGGGTTTAAAATACAGTCAATGTTTAGATGAGCTGCTGTTACAGGCACAT  
GGTCTGGTTAGCAAAGGGTTAAATCCTGCATCCCGTTTTTAGTCATCAAGCTAGCTCAG  
ATCTGCCACCTTGGAGCCCTG

>2276

GTTTAGATGAGCTGCTGTTACAGGCACATGGTCTGGTTAGCAAAGGGTTAAATCCTGCAT  
CCCGTTTTTAGTCATCAAGCTAGCTCAGATCTGCCACCTTGGAGCCCTGTGCTTTCCT  
GCCTTAGTGGGCAGAGTCTAGG

>2277

GAGCTGCTGTTACAGGCACATGGTCTGGTTAGCAAAGGGTTAAATCCTGCATCCCGTTTT  
TAGTCATCAAGCTAGCTCAGATCTGCCACCTTGGAGCCCTGTGCTTTCCTGCCTTAGT  
GGGCAGAGTCTAGGGGACCTGT

>2278

TGCTGTTACAGGCACATGGTCTGGTTAGCAAAGGGTTAAATCCTGCATCCCGTTTTTAGT  
CATCAAGCTAGCTCAGATCTGCCACCTTGGAGCCCTGTGCTTTCCTGCCTTAGTGGGC  
AGAGTCTAGGGGACCTGTGGCA

>2279

GTTAGCAAAGGGTTAAATCCTGCATCCCGTTTTTAGTCATCAAGCTAGCTCAGATCTGC  
CCACCTTGGAGCCCTGTGCTTTCCTGCCTTAGTGGGCAGAGTCTAGGGGACCTGTGGC  
ATGTTCAATGATTGAGGACTCTT

>2280

GCATCCCGTTTTTAGTCATCAAGCTAGCTCAGATCTGCCACCTTGGAGCCCTGTGCTT  
TCCTGCCTTAGTGGGCAGAGTCTAGGGGACCTGTGGCATGTTCAATGATTGAGGACTC  
TTGTCCAGATTCCAAAAACCTAC

>2281

TTTTAGTCATCAAGCTAGCTCAGATCTGCCACCTTGGAGCCCTGTGCTTTCCTGCCTT  
AGTGGGCAGAGTCTAGGGGACCTGTGGCATGTTCAATGATTGAGGACTCTTGTCCAGA  
TTCCAAAAACCTACTGTGATGAT

>2282

GTCATCAAGCTAGCTCAGATCTGCCACCTTGGAGCCCTGTGCTTTCCTGCCTTAGTGG  
GCAGAGTCTAGGGGACCTGTGGCATGTTCAATGATTGAGGACTCTTGTCCAGATTCCA  
AAAACCTACTGTGATGATGCTGT

>2283

CTTGGAGCCCTGTGCTTTCCTGCCTTAGTGGGCAGAGTCTAGGGGACCTGTGGCATGT  
TCAATGATTGAGGACTCTTGTCCAGATTCCAAAAACCTACTGTGATGATGCTGTTCTGA  
AGCTGTGGTAGGCGGTGATTGAG

>2284

GCTTTCCTGCCTTAGTGGGCAGAGTCTAGGGGACCTGTGGCATGTTCAATGATTGAGG

ACTCTTGCCAGATTCCAAAAACCTACTGTGATGATGCTGTTCTGAAGCTGTGGTAGGC  
GGTGATTGAGTGGAGTGTGTAGT

>2285

GTGGCATGTTCAATGATTGAGGACTCTTGCCAGATTCCAAAAACCTACTGTGATGATG  
CTGTTCTGAAGCTGTGGTAGGCGGTGATTGAGTGGAGTGTGTAGTGACCCTCAGGAAT  
TCTTCAGAAGTTAGGATTTTGAC

>2286

TCAATGATTGAGGACTCTTGCCAGATTCCAAAAACCTACTGTGATGATGCTGTTCTGA  
AGCTGTGGTAGGCGGTGATTGAGTGGAGTGTGTAGTGACCCTCAGGAATTCTTCAGAA  
GTTAGGATTTTGACGATACCTCT

>2287

GATTCCAAAAACCTACTGTGATGATGCTGTTCTGAAGCTGTGGTAGGCGGTGATTGAGT  
GGAGTGTGTAGTGACCCTCAGGAATTCTTCAGAAGTTAGGATTTTGACGATACCTCTGA  
TAAGTTGGGTTTTTAATTTGCT

>2288

ACCTACTGTGATGATGCTGTTCTGAAGCTGTGGTAGGCGGTGATTGAGTGGAGTGTGTA  
GTGACCCTCAGGAATTCTTCAGAAGTTAGGATTTTGACGATACCTCTGATAAGTTGGGT  
TTTTAATTTGCTGGTTTATCTT

>2289

TGATGCTGTTCTGAAGCTGTGGTAGGCGGTGATTGAGTGGAGTGTGTAGTGACCCTCA  
GGAATTCTTCAGAAGTTAGGATTTTGACGATACCTCTGATAAGTTGGGTTTTTAATTTGC  
TGGTTTATCTTAGAGTGGAGGC

>2290

GTTCTGAAGCTGTGGTAGGCGGTGATTGAGTGGAGTGTGTAGTGACCCTCAGGAATTC  
TTCAGAAGTTAGGATTTTGACGATACCTCTGATAAGTTGGGTTTTTAATTTGCTGGTTA  
TCTTAGAGTGGAGGCTGTGGCC

>2291

ATTGAGTGGAGTGTGTAGTGACCCTCAGGAATTCTTCAGAAGTTAGGATTTTGACGATA  
CCTCTGATAAGTTGGGTTTTTAATTTGCTGGTTTATCTTAGAGTGGAGGCTGTGGCCCA  
CAGCAAGTAGTACATTTCCAT

>2292

ATTCTTCAGAAGTTAGGATTTTGACGATACCTCTGATAAGTTGGGTTTTTAATTTGCTGG  
TTTATCTTAGAGTGGAGGCTGTGGCCACAGCAAGTAGTACATTTCCATCTCAGCCCA  
GTGCATGGACAAACGTACCTC

>2293

TCTTCAGAAGTTAGGATTTTGACGATACCTCTGATAAGTTGGGTTTTTAATTTGCTGGTT  
TATCTTAGAGTGGAGGCTGTGGCCACAGCAAGTAGTACATTTCCATCTCAGCCCAGT  
GCATGGACAAACGTACCTCAA

>2294

TGACGATACCTCTGATAAGTTGGGTTTTTAATTTGCTGGTTTATCTTAGAGTGGAGGCTG  
TGGCCACAGCAAGTAGTACATTTCCATCTCAGCCCAGTGCATGGACAAACGTACCTC  
AAACCAAAGTTCAATGAAGC

>2295

TTTTTAATTTGCTGGTTTATCTTAGAGTGGAGGCTGTGGCCACAGCAAGTAGTACATTT  
TCCATCTCAGCCCAGTGCATGGACAAACGTACCTCAAACCAAAGTTCAATGAAGCTC  
TATTTATCTTACTATATGCTC

>2296

AATTTGCTGGTTTATCTTAGAGTGGAGGCTGTGGCCACAGCAAGTAGTACATTTTCCA  
TCTCAGCCCAGTGCATGGACAAACGTACCTCAAACCAAAGGTTCAATGAAGCTCTATT  
TATCTTTACTATATGCTCTGGTA

>2297

TGTGGCCACAGCAAGTAGTACATTTTCCATCTCAGCCCAGTGCATGGACAAACGTAC  
CTCAAACCAAAGGTTCAATGAAGCTCTATTTATCTTTACTATATGCTCTGGTATCTTCTCT  
TCCATTCTATCTTATTTCAAT

>2298

AATGAAGCTCTATTTATCTTTACTATATGCTCTGGTATCTTCTCTTCCATTCTATCTTATT  
CATTTAAGAACGTTAATGAAGACCCACTAATGGATTGCCACCCATGGTTGAGGAGGTC  
CCCCAAACAGTGAGGCCTT

>2299

TTATCTTTACTATATGCTCTGGTATCTTCTCTTCCATTCTATCTTATTTCAATTAAGAACGT  
TAATGAAGACCCACTAATGGATTGCCACCCATGGTTGAGGAGGTCCCCAAACAGTG  
AGGCCTTAGCCATAGGTATT

>2300

TCCATTCTATCTTATTTCAATTAAGAACGTTAATGAAGACCCACTAATGGATTGCCACCC  
ATGGTTGAGGAGGTCCCCAAACAGTGAGGCCTTAGCCATAGGTATTCAATTCAAAA  
AGCATTACTGAGCATCACTGT

>2301

TCATTTAAGAACGTTAATGAAGACCCACTAATGGATTGCCACCCATGGTTGAGGAGGT  
CCCCAAACAGTGAGGCCTTAGCCATAGGTATTCAATTCAAAAAGCATTACTGAGCAT  
CACTGTGTACTAGGTGGTTGCT

>2302

CGTTAATGAAGACCCACTAATGGATTGCCACCCATGGTTGAGGAGGTCCCCAAACA  
GTGAGGCCTTAGCCATAGGTATTCAATTCAAAAAGCATTACTGAGCATCACTGTGTAC  
TAGGTGGTTGCTAAATGCTATGG

>2303

TGAAGACCCACTAATGGATTGCCACCCATGGTTGAGGAGGTCCCCAAACAGTGAGG  
CCTTAGCCATAGGTATTCAATTCAAAAAGCATTACTGAGCATCACTGTGTACTAGGTG  
GTTGCTAAATGCTATGGGGGTAA

>2304

ATTGCCACCCATGGTTGAGGAGGTCCCCAAACAGTGAGGCCTTAGCCATAGGTATTC  
AATTCAAAAAGCATTACTGAGCATCACTGTGTACTAGGTGGTTGCTAAATGCTATGGG  
GGTAATGCAGAGAAATTAATAA

>2305

CCCAAACAGTGAGGCCTTAGCCATAGGTATTCAATTCAAAAAGCATTACTGAGCATCA  
CTGTGTACTAGGTGGTTGCTAAATGCTATGGGGGTAATGCAGAGAAATTAATAAATCCC  
TGTAAGAGTTCACTGTAAAACA

>2306

CAATTCAAAAAGCATTACTGAGCATCACTGTGTACTAGGTGGTTGCTAAATGCTATGG  
GGGTAATGCAGAGAAATTAATAAATCCCTGTAAGAGTTCACTGTAAAACAGAAATGAC  
AGCCATATGTGTATGACTTTGTG

>2307

ATTCAAAAGCATTACTGAGCATCACTGTGTACTAGGTGGTTGCTAAATGCTATGGGG

GTAATGCAGAGAAATTAATAAATCCCTGTAAGAGTTCACTGTAAAACAGAAATGACAG  
CCATATGTGTATGACTTTGTGTG

>2308

TGGTTGCTAAATGCTATGGGGGTAATGCAGAGAAATTAATAAATCCCTGTAAGAGTTCA  
CTGTAAAACAGAAATGACAGCCATATGTGTATGACTTTGTGTGTGTGTGTATATATATA  
TCAGACTGTATGATTAATA

>2309

AATGCTATGGGGGTAATGCAGAGAAATTAATAAATCCCTGTAAGAGTTCACTGTAAAAC  
AGAAATGACAGCCATATGTGTATGACTTTGTGTGTGTGTGTATATATATATATCAGACTGT  
ATGATTAATATTATATAAG

>2310

GTTCACTGTAAAACAGAAATGACAGCCATATGTGTATGACTTTGTGTGTGTGTGTATATA  
TATATATCAGACTGTATGATTAATATTATATAAGTGAGGTATGGGGGAGCAGAGGAGAG  
GAATTGAATTTTGAATTTG

>2311

CCATATGTGTATGACTTTGTGTGTGTGTGTATATATATATATCAGACTGTATGATTAATAT  
TATATAAGTGAGGTATGGGGGAGCAGAGGAGAGGAATTGAATTTTGAATTTTGAATTGAA  
GATTCAGGAGGGCTTCATG

>2312

ATGTGTATGACTTTGTGTGTGTGTGTATATATATATATCAGACTGTATGATTAATATTATA  
TAAGTGAGGTATGGGGGAGCAGAGGAGAGGAATTGAATTTTGAATTTTGAATTGAGAT  
TCAGGAGGGCTTCATGGAGG

>2313

GATTAAATATTATATAAGTGAGGTATGGGGGAGCAGAGGAGAGGAATTGAATTTTGAAT  
TTTGATTGAAGATTCAGGAGGGCTTCATGGAGGAGGTAGCATTGGCCAGGTTTTAGA  
GAATGGCTAGGCTTTGGACAAGT

>2314

ATATTATATAAGTGAGGTATGGGGGAGCAGAGGAGAGGAATTGAATTTTGAATTTTGAAT  
TGAAGATTCAGGAGGGCTTCATGGAGGAGGTAGCATTGGCCAGGTTTTAGAGAATGG  
CTAGGCTTTGGACAAGTGGAGAC

>2315

ATGGGGGAGCAGAGGAGAGGAATTGAATTTTGAATTTTGAATTGAGATTGAGGAGGGC  
TTCATGGAGGAGGTAGCATTGGCCAGGTTTTAGAGAATGGCTAGGCTTTGGACAAGT  
GGAGACAGGAACTGCCATTTGGAG

>2316

TTGAATTTTGAATTTTGAATTGATTGAAGATTCAGGAGGGCTTCATGGAGGAGGTAGCATTGG  
CCAGGTTTTAGAGAATGGCTAGGCTTTGGACAAGTGGAGACAGGAACTGCCATTTGGA  
GGTAGGAGATGAGCTAATGTGTG

>2317

GAATTTTGAATTTTGAATTGATTGAAGATTCAGGAGGGCTTCATGGAGGAGGTAGCATTGGCC  
AGGTTTTAGAGAATGGCTAGGCTTTGGACAAGTGGAGACAGGAACTGCCATTTGGAG  
GTAGGAGATGAGCTAATGTGTG

>2318

ATTTTGAATTGAGATTGAGGAGGGCTTCATGGAGGAGGTAGCATTGGCCAGGTTTTAG  
AGAATGGCTAGGCTTTGGACAAGTGGAGACAGGAACTGCCATTTGGAGGTAGGAGAT  
GAGCTAATGTGTGGCAGTGTATGG

>2319

GATTCAGGAGGGCTTCATGGAGGAGGTAGCATTGGCCAGGTTTTAGAGAATGGCTAG  
GCTTTGGACAAGTGGAGACAGGAACTGCCATTTGGAGGTAGGAGATGAGCTAATGTGT  
GGCAGTGTATGGGTGGGGGCAGGT

>2320

GTAGCATTGGCCAGGTTTTAGAGAATGGCTAGGCTTTGGACAAGTGGAGACAGGAAC  
TGCCATTTGGAGGTAGGAGATGAGCTAATGTGTGGCAGTGTATGGGTGGGGGCAGGTG  
CCTGTATACAAGGTAGTGTGCTGG

>2321

CAGGTTTTAGAGAATGGCTAGGCTTTGGACAAGTGGAGACAGGAACTGCCATTTGGAG  
GTAGGAGATGAGCTAATGTGTGGCAGTGTATGGGTGGGGGCAGGTGCCTGTATACAAG  
GTAGTGTGCTGGAATGGGGCGATG

>2322

TGGCTAGGCTTTGGACAAGTGGAGACAGGAACTGCCATTTGGAGGTAGGAGATGAGCT  
AATGTGTGGCAGTGTATGGGTGGGGGCAGGTGCCTGTATACAAGGTAGTGTGCTGGAA  
TGGGGCGATGGGCATGGGGTAGGA

>2323

AGTGGAGACAGGAACTGCCATTTGGAGGTAGGAGATGAGCTAATGTGTGGCAGTGTAT  
GGGTGGGGGCAGGTGCCTGTATACAAGGTAGTGTGCTGGAATGGGGCGATGGGCATGG  
GGTAGGATGGGAGATCAAGCAGGG

>2324

ATTTGGAGGTAGGAGATGAGCTAATGTGTGGCAGTGTATGGGTGGGGGCAGGTGCCTG  
TATACAAGGTAGTGTGCTGGAATGGGGCGATGGGCATGGGGTAGGATGGGAGATCAAG  
CAGGGAAAGTGGATTGGGGCCAGG

>2325

AGTGTATGGGTGGGGGCAGGTGCCTGTATACAAGGTAGTGTGCTGGAATGGGGCGATG  
GGCATGGGGTAGGATGGGAGATCAAGCAGGGAAAGTGGATTGGGGCCAGGTCCTAGA  
ATGATTTGAATACCAAGCTAGCTTT

>2326

GGTGGGGGCAGGTGCCTGTATACAAGGTAGTGTGCTGGAATGGGGCGATGGGCATGGG  
GTAGGATGGGAGATCAAGCAGGGAAAGTGGATTGGGGCCAGGTCCTAGAATGATTTGA  
ATACCAAGCTAGCTTTCTGGACAT

>2327

GGAATGGGGCGATGGGCATGGGGTAGGATGGGAGATCAAGCAGGGAAAGTGGATTGG  
GGCCAGGTCCTAGAATGATTTGAATACCAAGCTAGCTTTCTGGACATTTGTAAGGCGCA  
CTTGATAGGGTTGGATCATTGCG

>2328

TGGGGTAGGATGGGAGATCAAGCAGGGAAAGTGGATTGGGGCCAGGTCCTAGAATGA  
TTTGAATACCAAGCTAGCTTTCTGGACATTTGTAAGGCGCACTTGATAGGGTTGGATC  
ATTGCGATATTATTGGAAGACAAA

>2329

AGGGAAAGTGGATTGGGGCCAGGTCCTAGAATGATTTGAATACCAAGCTAGCTTTCTG  
GACATTTGTAAGGCGCACTTGATAGGGTTGGATCATTGCGATATTATTGGAAGACAAA  
ACTGGGGAGGGTGTGAGACCATG

>2330

TGGGGCCAGGTCCTAGAATGATTTGAATACCAAGCTAGCTTTCTGGACATTTGTAAGGC

GCACTTGATAGGGTTGGATCATTGCGATATTATTGGAAGACAAAACCTGGGGAGGGTG  
TGAGACCATGTGGCTGCTCAGAA

>2331

CCAAGCTAGCTTTCTGGACATTTGTAAGGCGCACTTGATAGGGTTGGATCATTGCGAT  
ATTATTGGAAGACAAAACCTGGGGAGGGTGTGAGACCATGTGGCTGCTCAGAATGCAG  
AGCCCCTCTGATGTCCTCAGCCTT

>2332

TGGACATTTGTAAGGCGCACTTGATAGGGTTGGATCATTGCGATATTATTGGAAGACA  
AAACTGGGGAGGGTGTGAGACCATGTGGCTGCTCAGAATGCAGAGCCCCTCTGATGTC  
CTCAGCCTTCTACGTATTTAGTG

>2333

AGGGGTTGGATCATTGCGATATTATTGGAAGACAAAACCTGGGGAGGGTGTGAGACCAT  
GTGGCTGCTCAGAATGCAGAGCCCCTCTGATGTCCTCAGCCTTCTACGTATTTAGTGAT  
GGGGTGGTGGTAAAGAGCC

>2334

GGATCATTGCGATATTATTGGAAGACAAAACCTGGGGAGGGTGTGAGACCATGTGGCTG  
CTCAGAATGCAGAGCCCCTCTGATGTCCTCAGCCTTCTACGTATTTAGTGATGGGGTG  
GTGGTAAAGAGCCTTGCAGA

>2335

GAAGACAAAACCTGGGGAGGGTGTGAGACCATGTGGCTGCTCAGAATGCAGAGCCCCT  
CTGATGTCCTCAGCCTTCTACGTATTTAGTGATGGGGTGGTGGTAAAGAGCCTTG  
CAGACAGCCTGGCTTGGGTGCTTG

>2336

TCAGAATGCAGAGCCCCTCTGATGTCCTCAGCCTTCTACGTATTTAGTGATGGGGTGG  
TGGTAAAGAGCCTTGCAGACAGCCTGGCTTGGGTGCTTGAAGTTCTTACGC  
CCACTAACTCCTGCCCTGCTCTG

>2337

AGAATGCAGAGCCCCTCTGATGTCCTCAGCCTTCTACGTATTTAGTGATGGGGTGGT  
GTGGTAAAGAGCCTTGCAGACAGCCTGGCTTGGGTGCTTGAAGTTCTTACGCC  
ACTAACTCCTGCCCTGCTCTGTG

>2338

CGTATTTAGTGATGGGGTGGTGGTAAAGAGCCTTGCAGACAGCCTGGCTTGGGT  
GCTTGCTTGAAGTTCTTACGCCACTAACTCCTGCCCTGCTCTGTGGAGCCTGCTGAAT  
GGGGCATTAGGCTAGTCACACAC

>2339

TGCAGACAGCCTGGCTTGGGTGCTTGAAGTTCTTACGCCACTAACTCCTGCCCT  
GCTCTGTGGAGCCTGCTGAATGGGGCATTAGGCTAGTCACACACCTGTCCTTTTCACA  
TTCATGCTGTACCCTTTGCAAA

>2340

TGCTTGCTTGAAGTTCTTACGCCACTAACTCCTGCCCTGCTCTGTGGAGCCTGCTGAA  
TGGGGCATTAGGCTAGTCACACACCTGTCCTTTTTCACATTCATGCTGTACCCTTTGCA  
AACATTACGCAGCAGTGCAAAC

>2341

GGGGCATTAGGCTAGTCACACACCTGTCCTTTTTCACATTCATGCTGTACCCTTTGCAA  
ACATTACGCAGCAGTGCAAACCTAGCCCTGGGCCTCAGAGGAGCCAGGCGTGGCCAG  
GAGAGTGGGATTTGGAACGGAAGT

>2342

GCATTAGGCTAGTCACACACCTGTCCTTTTTACATTCATGCTGTACCCTTTGCAAACAT  
TACGCAGCAGTGCAAACCTAGCCCTGGGCCTCAGAGGAGCCAGGCGTGGCCAGGAGA  
GTGGGATTTGGAACGGAAGTGCT

>2343

GTCACACACCTGTCCTTTTTACATTCATGCTGTACCCTTTGCAAACATTACGCAGCAG  
TGCAAACCTAGCCCTGGGCCTCAGAGGAGCCAGGCGTGGCCAGGAGAGTGGGATTTG  
GAACGGAAGTGCTTTTGTTTTTGG

>2344

CCTTTTTACATTCATGCTGTACCCTTTGCAAACATTACGCAGCAGTGCAAACCTAGCC  
CTGGGCCTCAGAGGAGCCAGGCGTGGCCAGGAGAGTGGGATTTGGAACGGAAGTGCT  
TTTTTTTTGGCATTCACTACTCC

>2345

TTCATTCATGCTGTACCCTTTGCAAACATTACGCAGCAGTGCAAACCTAGCCCTGGG  
CCTCAGAGGAGCCAGGCGTGGCCAGGAGAGTGGGATTTGGAACGGAAGTGCTTTTGT  
TTTTGGCATTCACTACTCCCCAC

>2346

GCAGTGCAAACCTAGCCCTGGGCCTCAGAGGAGCCAGGCGTGGCCAGGAGAGTGGG  
ATTTGGAACGGAAGTGCTTTTGTTTTTGGCATTCACTACTCCCCACCCCCACTGGCAC  
TTGGATTGTCCTTCTTTTTCTCCTT

>2347

CTACTCCCCACCCCCACTGGCACTTGGATTGTCCTTCTTTTTCTCCTTGGTGTCTCTCA  
TCCTGTCCAGCCTTCAAGACCTCCTCAAGTCAGGCTTCTCTGGGAAGCGCTGTCTGTC  
TGCTTGGTGCTTGCTGGCTTC

>2348

CCACCCCCACTGGCACTTGGATTGTCCTTCTTTTTCTCCTTGGTGTCTCTCATCCTGTCC  
AGCCTTCAAGACCTCCTCAAGTCAGGCTTCTCTGGGAAGCGCTGTCTGTCTGTCTTGG  
TGCTTGCTGGCTTCTCTTCTG

>2349

CTTTTTCTCCTTGGTGTCTCTCATCCTGTCCAGCCTTCAAGACCTCCTCAAGTCAGGCT  
TCTCTGGGAAGCGCTGTCTGTCTGTCTTGGTGCTTGCTGGCTTCTCTTCTGTCTCCTG  
TGCCATCTCCAGTTTGCACCAT

>2350

CTCTGGGAAGCGCTGTCTGTCTGTCTTGGTGCTTGCTGGCTTCTCCTTCTGTCTCCTGT  
GCCATCTCCAGTTTGCACCATTTGAGTATAAGCTCTGCTGCCTCATTTGAGTTTAAGTTT  
TATCCCCCAGCCACAACCTA

>2351

TCTGTCTGTCTTGGTGCTTGCTGGCTTCTCTTCTGTCTCCTGTGCCATCTCCAGTTTGC  
ACCATTTGAGTATAAGCTCTGCTGCCTCATTTGAGTTTAAGTTTATCCCCCAGCCACA  
ACCTAAGTTCCATGAGGATA

>2352

TTCTCTTCTGTCTCCTGTGCCATCTCCAGTTTGCACCATTTGAGTATAAGCTCTGCTGC  
CTCATTTGAGTTTAAGTTTATCCCCCAGCCACAACCTAAGTTCCATGAGGATAGTGAT  
TGTGGTTTATCTTCTCTCCC

>2353

CCATCTCCAGTTTGCACCATTTGAGTATAAGCTCTGCTGCCTCATTTGAGTTTAAGTTT

ATCCCCCAGCCACAACCTAAGTTCATGAGGATAGTGATTGTGGTTTATCTTCTCTCCC  
TCAGCTGTCTGCTGACACCA

>2354

TGCACCATTTGAGTATAAGCTCTGCTGCCTCATTTGAGTTTAAGTTTTATCCCCCAGCC  
ACAACCTAAGTTCATGAGGATAGTGATTGTGGTTTATCTTCTCTCCCTCAGCTGTCTGC  
TGACACCATGCTGAATACAT

>2355

TGAGTATAAGCTCTGCTGCCTCATTTGAGTTTAAGTTTTATCCCCCAGCCACAACCTAA  
GTTCCATGAGGATAGTGATTGTGGTTTATCTTCTCTCCCTCAGCTGTCTGCTGACACCAT  
GCTGAATACATAGTAGGTAC

>2356

AGTTTTATCCCCCAGCCACAACCTAAGTTCATGAGGATAGTGATTGTGGTTTATCTTC  
TCTCCCTCAGCTGTCTGCTGACACCATGCTGAATACATAGTAGGTACTCAGTAAATAATA  
GCTAATTGAGCATTACTAT

>2357

CCATGAGGATAGTGATTGTGGTTTATCTTCTCTCCCTCAGCTGTCTGCTGACACCATGCT  
GAATACATAGTAGGTACTCAGTAAATAATAGCTAATTGAGCATTACTATGGACAAAGCA  
CTTACTTGCCATTAACACAT

>2358

TGAGGATAGTGATTGTGGTTTATCTTCTCTCCCTCAGCTGTCTGCTGACACCATGCTGAA  
TACATAGTAGGTACTCAGTAAATAATAGCTAATTGAGCATTACTATGGACAAAGCACTT  
TACTTGCCATTAACACATCCC

>2359

TCTCCCTCAGCTGTCTGCTGACACCATGCTGAATACATAGTAGGTACTCAGTAAATAATA  
GCTAATTGAGCATTACTATGGACAAAGCACTTACTTGCCATTAACACATCCCATCCTCA  
CAACCACCTGTGAGGTGAAT

>2360

TGACACCATGCTGAATACATAGTAGGTACTCAGTAAATAATAGCTAATTGAGCATTACT  
ATGGACAAAGCACTTACTTGCCATTAACACATCCCATCCTCACAACCACCTGTGAGGTG  
AATCCTATTAAGGAATACT

>2361

ATTGAGCATTACTATGGACAAAGCACTTACTTGCCATTAACACATCCCATCCTCACAAC  
CACCTGTGAGGTGAATCCTATTAAGGAATACTTGGGTGCTTTCAGAGTTATTCTCTC  
CAGCTTTGGACTTCTTGTTTC

>2362

GACAAAGCACTTACTTGCCATTAACACATCCCATCCTCACAACCACCTGTGAGGTGAAT  
CCTATTAAGGAATACTTGGGTGCTTTCAGAGTTATTCTCTCCAGCTTTGGACTTCTTG  
TTTCATTTGCCCTGAGAGCTC

>2363

TTAACACATCCCATCCTCACAACCACCTGTGAGGTGAATCCTATTAAGGAATACTTG  
GGTGCTTTCAGAGTTATTCTCTCCAGCTTTGGACTTCTTGTTTCATTTGCCCTGAGAGCT  
CCTCAACTCTGTTGATGCTGT

>2364

AAAAGGAATACTTGGGTGCTTTCAGAGTTATTCTCTCCAGCTTTGGACTTCTTGTTTCA  
TTTGCCCTGAGAGCTCCTCAACTCTGTTGATGCTGTTCTTCAAAGGTTGCTTGTGACC  
TCTTAGTTCTCAAGAGCACTGT



>2365

AAGGAATACTTGGGTGCTTTCAGAGTTATTCTCTCCAGCTTTGGACTTCTTGTTTCATTT  
GCCCTGAGAGCTCCTCAACTCTGTTGATGCTGTTCTTCAAAGGTTGCTTGTGACCTCT  
TAGTTCTCAAGAGCACTGTAT

>2366

TCCAGCTTTGGACTTCTTGTTTCATTTGCCCTGAGAGCTCCTCAACTCTGTTGATGCTG  
TTCTTCAAAGGTTGCTTGTGACCTCTTAGTTCTCAAGAGCACTGTATTAGGTTGGTGC  
AAAAGTAATTGCTATTTTAGAC

>2367

TTTCATTTGCCCTGAGAGCTCCTCAACTCTGTTGATGCTGTTCTTCAAAGGTTGCTTG  
TGACCTCTTAGTTCTCAAGAGCACTGTATTAGGTTGGTGCAAAAGTAATTGCTATTTTA  
GACATTACTTTCAATGGCAAAA

>2368

GCCCTGAGAGCTCCTCAACTCTGTTGATGCTGTTCTTCAAAGGTTGCTTGTGACCTCT  
TAGTTCTCAAGAGCACTGTATTAGGTTGGTGCAAAAGTAATTGCTATTTAGACATTACT  
TTCAATGGCAAAAAGTGAAT

>2369

ATGCTGTTCTTCAAAGGTTGCTTGTGACCTCTTAGTTCTCAAGAGCACTGTATTAGGT  
TGGTGCAAAAGTAATTGCTATTTAGACATTACTTTCAATGGCAAAAAGTGAATTA  
TTGCGCCAATAACTTTCC

>2370

AGGTTGCTTGTGACCTCTTAGTTCTCAAGAGCACTGTATTAGGTTGGTGCAAAAGTAAT  
TGCTATTTAGACATTACTTTCAATGGCAAAAAGTGAATTA  
CTTTCCAGACTCCAGTATTG

>2371

TTGCTATTTAGACATTACTTTCAATGGCAAAAAGTGAATTA  
ACTTTCCAGACTCCAGTATTGGCTCCATTGACCCCTCCTGTTCTGCAACTTCTCCC  
CCTCCTCCTGTTATTTCT

>2372

TTTAGACATTACTTTCAATGGCAAAAAGTGAATTA  
CAGACTCCAGTATTGGCTCCATTGACCCCTCCTGTTCTGCAACTTCTCCCCTCCTC  
CTCTGGTATTTCTGGAATC

>2373

CATTGACCCCTCCTGTTCTGCAACTTCTCCCCTCCTCCTGTTATTTCTGGAATC  
CCCTCCCTAGGGTCAGTGCCATGTGGTGCCTGGAATCCCTGGGATCTGTGTTGAATC  
CTGACATTGCCACTTTCTAAG

>2374

CCCCTCCTGTTCTGCAACTTCTCCCCTCCTCCTGTTATTTCTGGAATCCCTCC  
CTAGGGTCAGTGCCATGTGGTGCCTGGAATCCCTGGGATCTGTGTTGAATCCTGACA  
TTGCCACTTTCTAAGTGGCAA

>2375

GGTCAGTGCCATGTGGTGCCTGGAATCCCTGGGATCTGTGTTGAATCCTGACATTGC  
CACTTTCTAAGTGGCAAACACTTTGGCCACCTCCCCTCCTCCTGAGTCTGTTTCATCA  
TCTGCAAAATGCTGGTAGTTTC

>2376

CTGTGTTTGAATCCTGACATTGCCACTTTCTAAGTGGCAAACACTTTGGCCACCTCCCC

CTCTTCCTGAGTCTGTTTCATCATCTGCAAATGCTGGTAGTTTCTTCTCACAGGAA  
AGATGGTGGTTGTTTCATCGATG

>2377

TAAGTGGCAAACACTTTGGCCACCTCCCCCTTCTCTGAGTCTGTTTCATCATCTGCAA  
AATGCTGGTAGTTTCTTCTCACAGGAAAGATGGTGGTTGTTTCATCGATGTCTGTTGA  
AACCGTGACCCTCTCTGCTGAA

>2378

TTGGCCACCTCCCCCTTCTCTGAGTCTGTTTCATCATCTGCAAATGCTGGTAGTTTCT  
CTTCTCACAGGAAAGATGGTGGTTGTTTCATCGATGTCTGTTGAAACCGTGACCCTCTCT  
GCTGAATGTAGAAGAAGATGA

>2379

CACCTCCCCCTTCTCTGAGTCTGTTTCATCATCTGCAAATGCTGGTAGTTTCTTCT  
CACAGGAAAGATGGTGGTTGTTTCATCGATGTCTGTTGAAACCGTGACCCTCTCTGCTG  
AATGTAGAAGAAGATGACCTTA

>2380

CTTCTCACAGGAAAGATGGTGGTTGTTTCATCGATGTCTGTTGAAACCGTGACCCTCTCT  
GCTGAATGTAGAAGAAGATGACCTTACCAGTTCTCTGTCTCTCCAGTGTCTTTCTTGA  
CAATCTTGTTGTTTCCACAAGC

>2381

CTCACAGGAAAGATGGTGGTTGTTTCATCGATGTCTGTTGAAACCGTGACCCTCTCTGCT  
GAATGTAGAAGAAGATGACCTTACCAGTTCTCTGTCTCTCCAGTGTCTTTCTTGACAA  
TCTTGTGGTTTCCACAAGCAAC

>2382

TGGTTGTTTCATCGATGTCTGTTGAAACCGTGACCCTCTCTGCTGAATGTAGAAGAAGAT  
GACCTTACCAGTTCTCTGTCTCTCCAGTGTCTTTCTTGACAATCTTGTTGTTTCCACA  
AGCAACCCTCTGTGGGTGATTT

>2383

CTGTTGAAACCGTGACCCTCTCTGCTGAATGTAGAAGAAGATGACCTTACCAGTTCTC  
CTGTCTCTCCAGTGTCTTTCTTGACAATCTTGTTGTTTCCACAAGCAACCCTCTGTGGG  
TGATTTCCAGATCTCTACCTCTA

>2384

GAAGAAGATGACCTTACCAGTTCTCTGTCTCTCCAGTGTCTTTCTTGACAATCTTGTTG  
GTTTCCACAAGCAACCCTCTGTGGGTGATTTCCAGATCTCTACCTCTAGTTGTTTTTCGT  
TTTTTGCTTTTCTTGTTT

>2385

CCTGTCTCTCCAGTGTCTTTCTTGACAATCTTGTTGTTTCCACAAGCAACCCTCTGTGG  
GTGATTTCCAGATCTCTACCTCTAGTTGTTTTTCGTTTTTGTCTTTTCTTGTTTCCACA  
CATTCTTTTCCAGTAGCCTC

>2386

TTTCCAGATCTCTACCTCTAGTTGTTTTTCGTTTTTGTCTTTTCTTGTTTCCACACATT  
CTTTTCCAGTAGCCTCACGGGCACACCAGTCTGCAAGGATCTAGAATGTGATGGTTTG  
AGCTAGTTCAACACCTTCT

>2387

CCAGATCTCTACCTCTAGTTGTTTTTCGTTTTTGTCTTTTCTTGTTTCCACACATTCTT  
TTCCAGTAGCCTCACGGGCACACCAGTCTGCAAGGATCTAGAATGTGATGGTTTGAG  
CTAGTTCAACACCTTCTCTC

>2388

GTTGTTTTTCGTTTTTTGTCTTTTCTTGTTTCACACATTCTTTTCCAGTAGCCTCACG  
GGCACACCAGTCTCTGCAAGGATCTAGAATGTGATGGTTTGAGCTAGTTCAACACCTTC  
CTCTCGAATCGTCTCCTGTGTC

>2389

CGTTTTTTGTCTTTTCTTGTTTCACACATTCTTTTCCAGTAGCCTCACGGGCACACCA  
GTCCTGCAAGGATCTAGAATGTGATGGTTTGAGCTAGTTCAACACCTTCCTCTCGAATC  
GTCTCCTGTGCCTCATGTTT

>2390

TGTCTTTTCTTGTTTCACACATTCTTTTCCAGTAGCCTCACGGGCACACCAGTCTG  
CAAGGATCTAGAATGTGATGGTTTGAGCTAGTTCAACACCTTCCTCTCGAATCGTCTCC  
TGTGTCCTCATGTTTTGTGGTC

>2391

TCACACATTCTTTTCCAGTAGCCTCACGGGCACACCAGTCTGCAAGGATCTAGAATGT  
GATGGTTTGAGCTAGTTCAACACCTTCCTCTCGAATCGTCTCCTGTGTCCTCATGTTTTG  
TGGTCTCTGCCCTCTCCAG

>2392

CTAGTTCAACACCTTCCTCTCGAATCGTCTCCTGTGTCCTCATGTTTTGTGGTCTTGCC  
CTCTCCAGGCACCCAAGTGCAGACTTTGGCATCATCTGTGGCTCCTGTCTTCCCTTT  
GCCTCCATATCCACCATTTG

>2393

TCCTCTCGAATCGTCTCCTGTGTCCTCATGTTTTGTGGTCTCTGCCCTCTCCAGGCAC  
CCAAGTGCAGACTTTGGCATCATCTGTGGCTCCTGTCTTCCCTTTGCCTCCATATCCAC  
CATTTGCCTCTCCAGCCTAC

>2394

TGCAGACTTTGGCATCATCTGTGGCTCCTGTCTTCCCTTTGCCTCCATATCCACCATTT  
GCCTCTCCAGCCTACTTAACCAGATGGCTGTCTGATTTCCTCACCAGCCTTCCTGCAG  
TGCACCCCTGCAAGGCTCATC

>2395

ATCATCTGTGGCTCCTGTCTTCCCTTTGCCTCCATATCCACCATTTGCCTCTCCAGCCT  
ACTTAACCAGATGGCTGTCTGATTTCCTCACCAGCCTTCCTGCAGTGCACCCCTGCAA  
GGCTCATCACCCCACTTCCCT

>2396

TTGCCTCCATATCCACCATTTGCCTCTCCAGCCTACTTAACCAGATGGCTGTCTGATT  
TCCTCACCAGCCTTCCTGCAGTGCACCCCTGCAAGGCTCATCACCCCACTTCCCTGAG  
CAGAGTAGGGCTCTGATGGGGT

>2397

TCTCCAGCCTACTTAACCAGATGGCTGTCTGATTTCCTCACCAGCCTTCCTGCAGTGC  
ACCCCTGCAAGGCTCATCACCCCACTTCCCTGAGCAGAGTAGGGCTCTGATGGGGTTG  
CTCTCCTGCTCTGAACCCTGCAG

>2398

GCTGTCTGATTTCCTCACCAGCCTTCCTGCAGTGCACCCCTGCAAGGCTCATCACCC  
ACTTCCCTGAGCAGAGTAGGGCTCTGATGGGGTTGCTCTCCTGCTCTGAACCCTGCAG  
TGGCTCACTATGGCCTATTCTAG

>2399

GATTTCTCACCAGCCTTCCTGCAGTGCACCCCTGCAAGGCTCATCACCCCACTTCCCT

GAGCAGAGTAGGGCTCTGATGGGGTTGCTCTCCTGCTCTGAACCCTGCAGTGGCTCAC  
TATGGCCTATTCTAGAGAAGAAA

>2400

GCTCATCACCCCACTTCCCTGAGCAGAGTAGGGCTCTGATGGGGTTGCTCTCCTGCTCT  
GAACCCTGCAGTGGCTCACTATGGCCTATTCTAGAGAAGAAACGAGAGAATTCTTAGC  
GTGGCATTCAAAGCCATCCGGGA

>2401

CAGAGTAGGGCTCTGATGGGGTTGCTCTCCTGCTCTGAACCCTGCAGTGGCTCACTAT  
GGCCTATTCTAGAGAAGAAACGAGAGAATTCTTAGCGTGGCATTCAAAGCCATCCGGG  
ATCCTAGATTCCAGCTACATTTTC

>2402

GCTCTCCTGCTCTGAACCCTGCAGTGGCTCACTATGGCCTATTCTAGAGAAGAAACGA  
GAGAATTCTTAGCGTGGCATTCAAAGCCATCCGGGATCCTAGATTCCAGCTACATTTTC  
ACTCTTCATCCCTTTCTCTGCAT

>2403

AACCCTGCAGTGGCTCACTATGGCCTATTCTAGAGAAGAAACGAGAGAATTCTTAGCG  
TGGCATTCAAAGCCATCCGGGATCCTAGATTCCAGCTACATTTTCACTCTTCATCCCTT  
CTCTGCATATTTCTTAGAATGT

>2404

ACTATGGCCTATTCTAGAGAAGAAACGAGAGAATTCTTAGCGTGGCATTCAAAGCCATC  
CGGGATCCTAGATTCCAGCTACATTTTCACTCTTCATCCCTTTCTCTGCATATTTCTTAGA  
ATGTACACCCCTGAAGGCAG

>2405

CAAAGCCATCCGGGATCCTAGATTCCAGCTACATTTTCACTCTTCATCCCTTTCTCTGCA  
TATTTCTTAGAATGTACACCCCTGAAGGCAGGGACCATCTTTTTCACATCTGTGTTACA  
ACCTTTTAGTCCACTCTCTAG

>2406

CTAGATTCCAGCTACATTTTCACTCTTCATCCCTTTCTCTGCATATTTCTTAGAATGTACA  
CCCCTGAAGGCAGGGACCATCTTTTTCACATCTGTGTTACAACCTTTTAGTCCACTCTC  
TAGCATATGGCAACTCAGCA

>2407

CATATTTCTTAGAATGTACACCCCTGAAGGCAGGGACCATCTTTTTCACATCTGTGTTAC  
AACCTTTTAGTCCACTCTCTAGCATATGGCAACTCAGCAGATGCTGCTGTTGAGTAAAC  
TCTTATGCTTCCCTTCCCATG

>2408

AATGTACACCCCTGAAGGCAGGGACCATCTTTTTCACATCTGTGTTACAACCTTTTAGT  
CCTCTCTAGCATATGGCAACTCAGCAGATGCTGCTGTTGAGTAAACTCTTATGCTTC  
CCTTCCCATGCCATATCCTTCT

>2409

TTCACATCTGTGTTACAACCTTTTAGTCCACTCTCTAGCATATGGCAACTCAGCAGATGC  
TGCTGTTGAGTAAACTCTTATGCTTCCCTTCCCATGCCATATCCTTCTCTGGTCATCGCA  
ACAGGGCCAAATCTCTCATG

>2410

AGATGCTGCTGTTGAGTAAACTCTTATGCTTCCCTTCCCATGCCATATCCTTCTCTGGTC  
ATCGCAACAGGGCCAAATCTCTCATGCTTCAGTGAAATGCCCTCTCCTTGCAGCATCC  
TTTCTGGGGCATTCTTCCTC

>2411

CTTATGCTTCCCTTCCCATGCCATATCCTTCTCTGGTCATCGCAACAGGGCCAAATCTCT  
CATGCTTCAGTGAAATGCCCTCTCCTTGCAGCATCCTTTCTGGGGCATTCTTCCTCCT  
TGCATCCAGTTGGAAATAAT

>2412

ATATCCTTCTCTGGTCATCGCAACAGGGCCAAATCTCTCATGCTTCAGTGAAATGCCCT  
CTCCTTGCAGCATCCTTTCTGGGGCATTCTTCCTCCTTGCATCCAGTTGGAAATAATAT  
GTCCCTCCATTGGAGCTCCC

>2413

TCATGCTTCAGTGAAATGCCCTCTCCTTGCAGCATCCTTTCTGGGGCATTCTTCCTCC  
TTGCATCCAGTTGGAAATAATATGTCCCTCCATTGGAGCTCCCACACCAGAAGAGGTAT  
AGATAAAGCCAGATACTTCTT

>2414

TGCAGCATCCTTTCTGGGGCATTCTTCCTCCTTGCATCCAGTTGGAAATAATATGTCCC  
TCCATTGGAGCTCCCACACCAGAAGAGGTATAGATAAAGCCAGATACTTCTTTTTTTTT  
TTTTTTTTTTGATACAGAGTC

>2415

GGGCATTCTTCCTCCTTGCATCCAGTTGGAAATAATATGTCCCTCCATTGGAGCTCCCAC  
ACCAGAAGAGGTATAGATAAAGCCAGATACTTCTTTTTTTTTTTTTTTTTTTGATACAGA  
GTCTCACTCTGTTGCCCAGG

>2416

TCTTCCTCCTTGCATCCAGTTGGAAATAATATGTCCCTCCATTGGAGCTCCCACACCAG  
AAGAGGTATAGATAAAGCCAGATACTTCTTTTTTTTTTTTTTTTTTTGATACAGAGTCTC  
ACTCTGTTGCCCAGGCTGGAG

>2417

TCCTTGCATCCAGTTGGAAATAATATGTCCCTCCATTGGAGCTCCCACACCAGAAGAGG  
TATAGATAAAGCCAGATACTTCTTTTTTTTTTTTTTTTTTTGATACAGAGTCTCACTCTGT  
TGCCCAGGCTGGAGTGTAGT

>2418

GGAGCTCCCACACCAGAAGAGGTATAGATAAAGCCAGATACTTCTTTTTTTTTTTTTTTTT  
TTTGATACAGAGTCTCACTCTGTTGCCCAGGCTGGAGTGTAGTGGCATGAACTGGGCTC  
ACTGCAGCCTCTGCCTTTGG

>2419

GGTATAGATAAAGCCAGATACTTCTTTTTTTTTTTTTTTTTTTGATACAGAGTCTCACTCT  
GTTGCCCAGGCTGGAGTGTAGTGGCATGAACTTGGCTCACTGCAGCCTCTGCCTCTTG  
GGTTCAAGTGATTCTTGCCTC

>2420

ATAAAGCCAGATACTTCTTTTTTTTTTTTTTTTTTTGATACAGAGTCTCACTCTGTTGCC  
AGGCTGGAGTGTAGTGGCATGAACTTGGCTCACTGCAGCCTCTGCCTTTGGGTTCAA  
GTGATTCTTGCCTCTCAGCCT

>2421

TTTTTTTGGATACAGAGTCTCACTCTGTTGCCCAGGCTGGAGTGTAGTGGCATGAACTTG  
GCTCACTGCAGCCTCTGCCTCTTGGGTTCAAGTGATTCTTGCCTCTCAGCCTCCCGAGT  
AGCTGAGATTACAGACATGCGC

>2422

CTCTGTTGCCCAGGCTGGAGTGTAGTGGCATGAACTTGGCTCACTGCAGCCTCTGCCT

CTTGGGTTCAAGTGATTCTTGCCTCTCAGCCTCCCGAGTAGCTGAGATTACAGACATGC  
GCTACCATGCCTGGCTAATTTTT

>2423

GAGTGTAGTGGCATGAACTTGGCTCACTGCAGCCTCTGCCTCTTGGGTTCAAGTGATTC  
TTGCGTCTCAGCCTCCCGAGTAGCTGAGATTACAGACATGCGCTACCATGCCTGGCTAA  
TTTTGTATTTTTAGTAGAGAT

>2424

GGCATGAACTTGGCTCACTGCAGCCTCTGCCTCTTGGGTTCAAGTGATTCTTGCCTCTC  
AGCCTCCCGAGTAGCTGAGATTACAGACATGCGCTACCATGCCTGGCTAATTTTTGTATT  
TTTAGTAGAGATGCGGTTTCA

>2425

GTCTCAGCCTCCCGAGTAGCTGAGATTACAGACATGCGCTACCATGCCTGGCTAATTTT  
TGATTTTTAGTAGAGATGCGGTTTACCATGCTGGCCAGGCTGGTCCCAACTCCTCG  
CCTCAAGTGATCTTCTGCCTT

>2426

TCAGCCTCCCGAGTAGCTGAGATTACAGACATGCGCTACCATGCCTGGCTAATTTTTGT  
ATTTTTAGTAGAGATGCGGTTTACCATGCTGGCCAGGCTGGTCCCAACTCCTCGCCT  
CAAGTGATCTTCTGCCTTAGC

>2427

TTTTGTATTTTTAGTAGAGATGCGGTTTACCATGCTGGCCAGGCTGGTCCCAACTC  
CTGCCTCAAGTGATCTTCTGCCTTAGCCTCCAGAGTGCTAGGATTACAGGTGTGAG  
TCACTGTGCCCGGCCTGGATCT

>2428

GAGATGCGGTTTACCATGCTGGCCAGGCTGGTCCCAACTCCTCGCCTCAAGTGATC  
TTCTGCCTTAGCCTCCAGAGTGCTAGGATTACAGGTGTGAGTCACTGTGCCCGGCCT  
GGATCTTTTATTGTTTGTATTTC

>2429

CAGGCTGGTCCCAACTCCTCGCCTCAAGTGATCTTCTGCCTTAGCCTCCAGAGTGC  
TAGGATTACAGGTGTGAGTCACTGTGCCCGGCCTGGATCTTTTATTGTTTGTATTCTGT  
TCATTTCTCCCTAAGAAACC

>2430

GTCCCAACTCCTCGCCTCAAGTGATCTTCTGCCTTAGCCTCCAGAGTGCTAGGATT  
ACAGGTGTGAGTCACTGTGCCCGGCCTGGATCTTTTATTGTTTGTATTCTGTTCAATTC  
TTCCCTAAGAAACCCACGTT

>2431

TACAGGTGTGAGTCACTGTGCCCGGCCTGGATCTTTTATTGTTTGTATTCTGTTCAATTC  
CTTCCCTAAGAAACCCACGTTTTTGTGGGCAGGACCTGGAATCCTATTAGTTATACA  
GCCCCGTTCTGTTCACTGCTC

>2432

GGCCTGGATCTTTTATTGTTTGTATTCTGTTCAATTCCTTCCCTAAGAAACCCACGTTTT  
TGTGGGCAGGACCTGGAATCCTATTAGTTATACAGCCCCGCTTCGTTCACTGCTCCCC  
TTCAGAGTCTAGTGCCTGG

>2433

TTGATTTCTGTTCAATTCCTTCCCTAAGAAACCCACGTTTTTGTGGGCAGGACCTGGA  
ATCCTATTAGTTATACAGCCCCGCTTCGTTCACTGCTCCCCCTCAGAGTCTAGTGCCT  
GGACATCATAGGTATTAGTA

>2434

CGTTTTTGTGGGCAGGACCTGGAATCCTATTCAGTTATACAGCCCCGCTTCGTCCACTG  
CTCCCCTTCAGAGTCTAGTGCCCTGGACATCATAGGTATTCAGTACCTCTTGCTGGCTTA  
GGAACAGGAGGATGCCTGATG

>2435

TTTTTGTGGGCAGGACCTGGAATCCTATTCAGTTATACAGCCCCGCTTCGTCCACTGCT  
CCCCTTCAGAGTCTAGTGCCCTGGACATCATAGGTATTCAGTACCTCTTGCTGGCTTAG  
GAACAGGAGGATGCCTGATGGC

>2436

AGTTATACAGCCCCGCTTCGTCCACTGCTCCCCTTCAGAGTCTAGTGCCCTGGACATCA  
TAGGTATTCAGTACCTCTTGCTGGCTTAGGAACAGGAGGATGCCTGATGGCCAGGGTG  
TTCCTCTGAAGCAGTGGTGGCTG

>2437

CGTCCACTGCTCCCCTTCAGAGTCTAGTGCCCTGGACATCATAGGTATTCAGTACCTCT  
TGCTGGCTTAGGAACAGGAGGATGCCTGATGGCCAGGGTGTTCCCTCTGAAGCAGTGGT  
GGCTGAGCTTTTTGAATATCTGC

>2438

CTGCTCCCCTTCAGAGTCTAGTGCCCTGGACATCATAGGTATTCAGTACCTCTTGCTGG  
CTTAGGAACAGGAGGATGCCTGATGGCCAGGGTGTTCCCTCTGAAGCAGTGGTGGCTGA  
GCTTTTTGAATATCTGCATTGTG

>2439

AGTGCCCTGGACATCATAGGTATTCAGTACCTCTTGCTGGCTTAGGAACAGGAGGATGC  
CTGATGGCCAGGGTGTTCCCTCTGAAGCAGTGGTGGCTGAGCTTTTTGAATATCTGCATT  
GTGCTAAGGGTAACTACCCAG

>2440

CCTCTTGCTGGCTTAGGAACAGGAGGATGCCTGATGGCCAGGGTGTTCCCTCTGAAGCA  
GTGGTGGCTGAGCTTTTTGAATATCTGCATTGTGCTAAGGGTAACTACCCAGGCAGTA  
CTGGTGGGGAAGGGCCCCAGAAG

>2441

TGCCTGATGGCCAGGGTGTTCCCTCTGAAGCAGTGGTGGCTGAGCTTTTTGAATATCTGC  
ATTGTGCTAAGGGTAACTACCCAGGCAGTACTGGTGGGGAAGGGCCCCAGAAGCAG  
GCCCAGACTCAGGTATTGTTAAAG

>2442

GGTGTTCCTCTGAAGCAGTGGTGGCTGAGCTTTTTGAATATCTGCATTGTGCTAAGGGT  
TAACTACCCAGGCAGTACTGGTGGGGAAGGGCCCCAGAAGCAGGCCCAGACTCAGGT  
ATTGTTAAAGCAGAGTCATCTTTG

>2443

TGGTGGCTGAGCTTTTTGAATATCTGCATTGTGCTAAGGGTAACTACCCAGGCAGTAC  
TGGTGGGGAAGGGCCCCAGAAGCAGGCCCAGACTCAGGTATTGTTAAAGCAGAGTCA  
TCTTTGCTCTGAAGTTTTTTCTTT

>2444

GAGCTTTTTGAATATCTGCATTGTGCTAAGGGTAACTACCCAGGCAGTACTGGTGGGG  
AAGGGCCCCAGAAGCAGGCCCAGACTCAGGTATTGTTAAAGCAGAGTCATCTTTGCTC  
TGAAGTTTTTTCTTTTATCTTTT

>2445

TATCTGCATTGTGCTAAGGGTAACTACCCAGGCAGTACTGGTGGGGAAGGGCCCCAG

AAGCAGGCCAGACTCAGGTATTGTTAAAGCAGAGTCATCTTTGCTCTGAAGTTTTTC  
TTTTATCTTTCTTTCTTTTT

>2446

GGTGGGGAAGGGCCCCAGAAGCAGGCCAGACTCAGGTATTGTTAAAGCAGAGTCAT  
CTTTGCTCTGAAGTTTTCTTTATCTTTCTTTCTTTTTAATTGGGGGAAACCTTGT  
CCTAATTGGCATCTTTATTGTG

>2447

TTCTTTTATCTTTCTTTCTTTTTAATTGGGGGAAACCTTGTCTAATTGGCATCTTTA  
TTGTGGCAGGAATAGGCCAGGCAGGGCTGGGGGAGTGTGAAGTCTGTGAAGGGAGGT  
GGCCTGGGGGCCCCCACACA

>2448

TATCTTTCTTTCTTTTTAATTGGGGGAAACCTTGTCTAATTGGCATCTTTATTGTGG  
CAGGAATAGGCCAGGCAGGGCTGGGGGAGTGTGAAGTCTGTGAAGGGAGGTGGCCTG  
GGGGCCCCCACACAATGCCT

>2449

GGAAACCTTGTCTAATTGGCATCTTTATTGTGGCAGGAATAGGCCAGGCAGGGCTGG  
GGGAGTGTGAAGTCTGTGAAGGGAGGTGGCCTGGGGGCCCCCACACAATGCCTGA  
TTGTGCAGGCATAGGTATGAACACA

>2450

GTCCTAATTGGCATCTTTATTGTGGCAGGAATAGGCCAGGCAGGGCTGGGGGAGTGTG  
AAGTCTGTGAAGGGAGGTGGCCTGGGGGCCCCCACACAATGCCTGATTGTGCAGG  
CATAGGTATGAACACATTGCAGCCT

>2451

TAATTGGCATCTTTATTGTGGCAGGAATAGGCCAGGCAGGGCTGGGGGAGTGTGAAGT  
CTGTGAAGGGAGGTGGCCTGGGGGCCCCCACACAATGCCTGATTGTGCAGGCATAG  
GTATGAACACATTGCAGCCTGTGT

>2452

GCTGGGGGAGTGTGAAGTCTGTGAAGGGAGGTGGCCTGGGGGCCCCCACACAATG  
CCTGATTGTGCAGGCATAGGTATGAACACATTGCAGCCTGTGTGCACCCACAGGGTGA  
CCACGAGCAAGGCCTGGGGACGAGG

>2453

AAGGGAGGTGGCCTGGGGGCCCCCACACAATGCCTGATTGTGCAGGCATAGGTATG  
AACACATTGCAGCCTGTGTGCACCCACAGGGTGACCACGAGCAAGGCCTGGGGACGA  
GGACTACGAGGCCTGCAGCTGGGTC

>2454

GGCCCCCACACAATGCCTGATTGTGCAGGCATAGGTATGAACACATTGCAGCCTGT  
GTGCACCCACAGGGTGACCACGAGCAAGGCCTGGGGACGAGGACTACGAGGCCTGC  
AGCTGGGTCCTCTTTCTCCCTCCTC

>2455

GCCTGATTGTGCAGGCATAGGTATGAACACATTGCAGCCTGTGTGCACCCACAGGGTG  
ACCACGAGCAAGGCCTGGGGACGAGGACTACGAGGCCTGCAGCTGGGTCCTCTTTTC  
TCCCTCCTACCCCCACCCAGTACC

>2456

ATGAACACATTGCAGCCTGTGTGCACCCACAGGGTGACCACGAGCAAGGCCTGGGGA  
CGAGGACTACGAGGCCTGCAGCTGGGTCCTCTTTCTCCCTCCTACCCCCACCCAGT  
ACCCACGTGATTGGGCCACATCCCA



>2457

ATTGCAGCTGTGTGCACCCACAGGGTGACCACGAGCAAGGCCTGGGGACGAGGACT  
ACGAGGCCTGCAGCTGGGTCTCTTTTCTCCCTCCTCACCCCCACCCAGTACCCACGT  
GATTGGGCCACATCCCAGTAACAAG

>2458

CAAGGCCTGGGGACGAGGACTACGAGGCCTGCAGCTGGGTCTCTTTTCTCCCTCCTC  
ACCCCCACCCAGTACCCACGTGATTGGGCCACATCCCAGTAACAAGCAGTCCTTGTGG  
AAGAGCCTTCATGAAGACCTTTGC

>2459

CCTGCAGCTGGGTCTCTTTTCTCCCTCCTCACCCCCACCCAGTACCCACGTGATTGGG  
CCACATCCCAGTAACAAGCAGTCCTTGTGGAAGAGCCTTCATGAAGACCTTTGCTGGG  
AGTGGCGGGCAGGGATCTGCGGG

>2460

CTGGGTCTCTTTTCTCCCTCCTCACCCCCACCCAGTACCCACGTGATTGGGCCACATC  
CCAGTAACAAGCAGTCCTTGTGGAAGAGCCTTCATGAAGACCTTTGCTGGGAGTGGCG  
GGCAGGGATCTGCGGGGAGCGTT

>2461

CCACCCAGTACCCACGTGATTGGGCCACATCCCAGTAACAAGCAGTCCTTGTGGAAGA  
GCCTTCATGAAGACCTTTGCTGGGAGTGGCGGGCAGGGATCTGCGGGGAGCGTTGCT  
GGTTCAAGCTGGGGCTTTCCTATGG

>2462

CGTGATTGGGCCACATCCCAGTAACAAGCAGTCCTTGTGGAAGAGCCTTCATGAAGAC  
CTTTGCTGGGAGTGGCGGGCAGGGATCTGCGGGGAGCGTTGCTGGTTCAAGCTGGGG  
CTTTCCTATGGATGATGCCTGTGA

>2463

CCACATCCCAGTAACAAGCAGTCCTTGTGGAAGAGCCTTCATGAAGACCTTTGCTGGG  
AGTGGCGGGCAGGGATCTGCGGGGAGCGTTGCTGGTTCAAGCTGGGGCTTTCCTATGG  
ATGATGTCCTGTGAAGGGTAGATC

>2464

CAAGCAGTCCTTGTGGAAGAGCCTTCATGAAGACCTTTGCTGGGAGTGGCGGGCAGG  
GATCTGCGGGGAGCGTTGCTGGTTCAAGCTGGGGCTTTCCTATGGATGATGCCTGTGA  
AGGGTAGATCCTGGAGGGACAGAC

>2465

GCGGGCAGGGATCTGCGGGGAGCGTTGCTGGTTCAAGCTGGGGCTTTCCTATGGATGA  
TGTCTGTGAAGGGTAGATCCTGGAGGGACAGACAGGTGTCTGATCTTTGGCAGGCAG  
GGATGTCTCATTGTACATTATAG

>2466

CAGGGATCTGCGGGGAGCGTTGCTGGTTCAAGCTGGGGCTTTCCTATGGATGATGCCT  
GTGAAGGGTAGATCCTGGAGGGACAGACAGGTGTCTGATCTTTGGCAGGCAGGGATG  
TCTCATTGTACATTATAGGTATT

>2467

GCTTTCCTATGGATGATGCCTGTGAAGGGTAGATCCTGGAGGGACAGACAGGTGTCT  
GATCTTTGGCAGGCAGGGATGTCTCATTGTACATTATAGGTATTCAAGTATCTTTGCTG  
GCTTAGGCTTCATAATGTCTCA

>2468

TCCTATGGATGATGCCTGTGAAGGGTAGATCCTGGAGGGACAGACAGGTGTCTGATC

TTTGGCAGGCAGGGATGTCTCATTTGTACATTATAGGTATTCAGTATCTCTTGCTGGCTT  
AGGCTTCATAATGTCTCATTTG

>2469

GGTAGATCCTGGAGGGACAGACAGGTGTCTGATCTTTGGCAGGCAGGGATGTCTCATT  
TGACATTATAGGTATTCAGTATCTCTTGCTGGCTTAGGCTTCATAATGTCTCATTTGTAC  
ATCATAGCCTTCAGTACCTCT

>2470

GTCTGATCTTTGGCAGGCAGGGATGTCTCATTTGTACATTATAGGTATTCAGTATCTCT  
GCTGGCTTAGGCTTCATAATGTCTCATTTGTACATCATAGCCTTCAGTACCTCTTGCTGA  
TTTGGTTAACCCAGTTGTTA

>2471

TTTGTACATTATAGGTATTCAGTATCTCTTGCTGGCTTAGGCTTCATAATGTCTCATTTGT  
ACATCATAGCCTTCAGTACCTCTTGCTGATTTGGTTAACCCAGTTGTTATACCACGATAT  
TGATTTTTTCATGCCATTTT

>2472

ATTATAGGTATTCAGTATCTCTTGCTGGCTTAGGCTTCATAATGTCTCATTTGTACATCAT  
AGCCTTCAGTACCTCTTGCTGATTTGGTTAACCCAGTTGTTATACCACGATATTGATTTT  
TCATGCCATTTTCTTTAGG

>2473

GTACCTCTTGCTGATTTGGTTAACCCAGTTGTTATACCACGATATTGATTTTTTCATGCCAT  
TTTCTTTAGGAAGATTGGAAGATCATTGAGGATAGGGACTGTGACCTTTTCTTTTTTTCT  
ACCCAGTACCCAACCTGG

>2474

CTCTTGCTGATTTGGTTAACCCAGTTGTTATACCACGATATTGATTTTTTCATGCCATTTTC  
TTTAGGAAGATTGGAAGATCATTGAGGATAGGGACTGTGACCTTTTCTTTTTTTCTACC  
CCAGTACCCAACCTGGCAGG

>2475

AACCCAGTTGTTATACCACGATATTGATTTTTTCATGCCATTTTCTTTAGGAAGATTGGAA  
GATCATTGAGGATAGGGACTGTGACCTTTTCTTTTTTTCTACCCAGTACCCAACCTGG  
CAGGTAGCACAGCGCAATGAT

>2476

AGTTGTTATACCACGATATTGATTTTTTCATGCCATTTTCTTTAGGAAGATTGGAAGATCAT  
TGAGGATAGGGACTGTGACCTTTTCTTTTTTTCTACCCAGTACCCAACCTGGCAGGTA  
GCACAGCGCAATGATCCACG

>2477

CATTTTCTTTAGGAAGATTGGAAGATCATTGAGGATAGGGACTGTGACCTTTTCTTTTTTT  
TCTACCCAGTACCCAACCTGGCAGGTAGCACAGCGCAATGATCCACGATGTTAATAG  
GTTGAATTGTAGAGGGGGCCT

>2478

GATTGGAAGATCATTGAGGATAGGGACTGTGACCTTTTCTTTTTTTCTACCCAGTACC  
CAACCTGGCAGGTAGCACAGCGCAATGATCCACGATGTTAATAGGTTGAATTGTAGA  
GGGGGCCTCTGATTCCAAGATG

>2479

ATCATTGAGGATAGGGACTGTGACCTTTTCTTTTTTTCTACCCAGTACCCAACCTGGC  
AGGTAGCACAGCGCAATGATCCACGATGTTAATAGGTTGAATTGTAGAGGGGGCCTCT  
GATTCCAAGATGGGGGCAGAA

>2480

TTTTCTTTTTTCTACCCAGTACCCAACCTGGCAGGTAGCACAGCGCAATGATCCACG  
ATGTTTAATAGGTTGAATTGTAGAGGGGGCCTCTGATTCCAAAGATGGGGGCAGAATAT  
CAGTCCTCTCCAGACTGCCTGG

>2481

CTACCCAGTACCCAACCTGGCAGGTAGCACAGCGCAATGATCCACGATGTTTAATAGG  
TTGAATTGTAGAGGGGGCCTCTGATTCCAAAGATGGGGGCAGAATATCAGTCCTCTCC  
AGACTGCCTGGGAATCCTCCTCT

>2482

CAGGTAGCACAGCGCAATGATCCACGATGTTTAATAGGTTGAATTGTAGAGGGGGCCT  
CTGATTCCAAAGATGGGGGCAGAATATCAGTCCTCTCCAGACTGCCTGGGAATCCTCCT  
CTCTCCAGCCTGGGCCTGGCCAG

>2483

AGCGCAATGATCCACGATGTTTAATAGGTTGAATTGTAGAGGGGGCCTCTGATTCCAAA  
GATGGGGGCAGAATATCAGTCCTCTCCAGACTGCCTGGGAATCCTCCTCTCTCCAGCCT  
GGGCCTGGCCAGTGGGAGACAG

>2484

GATCCACGATGTTTAATAGGTTGAATTGTAGAGGGGGCCTCTGATTCCAAAGATGGGGG  
CAGAATATCAGTCCTCTCCAGACTGCCTGGGAATCCTCCTCTCTCCAGCCTGGGCCTGG  
CCAGTGGGAGACAGAGGCTGCT

>2485

CCTCTGATTCCAAAGATGGGGGCAGAATATCAGTCCTCTCCAGACTGCCTGGGAATCCT  
CCTCTCTCCAGCCTGGGCCTGGCCAGTGGGAGACAGAGGCTGCTGAAGTAGCTGGCA  
AGGAGGCAAAGAAGATGATGACCT

>2486

ATGGGGGCAGAATATCAGTCCTCTCCAGACTGCCTGGGAATCCTCCTCTCTCCAGCCTG  
GGCCTGGCCAGTGGGAGACAGAGGCTGCTGAAGTAGCTGGCAAGGAGGCAAAGAAG  
ATGATGACCTAGCTACGGTCCTCAT

>2487

GCAGAATATCAGTCCTCTCCAGACTGCCTGGGAATCCTCCTCTCTCCAGCCTGGGCCTG  
GCCAGTGGGAGACAGAGGCTGCTGAAGTAGCTGGCAAGGAGGCAAAGAAGATGATG  
ACCTAGCTACGGTCCTCATGTGCC

>2488

CTCCAGACTGCCTGGGAATCCTCCTCTCTCCAGCCTGGGCCTGGCCAGTGGGAGACAG  
AGGCTGCTGAAGTAGCTGGCAAGGAGGCAAAGAAGATGATGACCTAGCTACGGTCCT  
CATGTGCCCACTGGGAATCATCTT

>2489

TGGGCCTGGCCAGTGGGAGACAGAGGCTGCTGAAGTAGCTGGCAAGGAGGCAAAGA  
AGATGATGACCTAGCTACGGTCCTCATGTGCCCACTGGGAATCATCTTTTTGCATCTG  
AGTTAGTCAATGTGCTGTGCATTCT

>2490

AGGCAAAGAAGATGATGACCTAGCTACGGTCCTCATGTGCCCACTGGGAATCATCTT  
TTTGCATCTGAGTTAGTCAATGTGCTGTGCATTCTCTGCAGAATTTGTGAACCTGGTATA  
GGTATGAGGTGAGAGAGGCCAG

>2491

TCCTCATGTGCCCACTGGGAATCATCTTTTTGCATCTGAGTTAGTCAATGTGCTGTGCA

TTCTCTGCAGAATTTGTGAACCTGGTATAGGTATGAGGTGAGAGAGGCCAGGAGGTCT  
GGCTGCTCCCCCTCTAGACTTC

>2492

AATCATCTTTTTGCATCTGAGTTAGTCAATGTGCTGTGCATTCTCTGCAGAATTTGTGAA  
CCTGGTATAGGTATGAGGTGAGAGAGGCCAGGAGGTCTGGCTGCTCCCCCTCTAGACT  
TCGCAGGTAAAACCCAAGGTGT

>2493

CTGAGTTAGTCAATGTGCTGTGCATTCTCTGCAGAATTTGTGAACCTGGTATAGGTATG  
AGGTGAGAGAGGCCAGGAGGTCTGGCTGCTCCCCCTCTAGACTTCGCAGGTAAAACC  
CAAGGTGTGTGCCACGTAAAGGTT

>2494

TTAGTCAATGTGCTGTGCATTCTCTGCAGAATTTGTGAACCTGGTATAGGTATGAGGTG  
AGAGAGGCCAGGAGGTCTGGCTGCTCCCCCTCTAGACTTCGCAGGTAAAACCCAAGG  
TGTGTGCCACGTAAAGGTTAGAG

>2495

GTCAATGTGCTGTGCATTCTCTGCAGAATTTGTGAACCTGGTATAGGTATGAGGTGAGA  
GAGGCCAGGAGGTCTGGCTGCTCCCCCTCTAGACTTCGCAGGTAAAACCCAAGGTGT  
GTGCCACGTAAAGGTTAGAGGTT

>2496

TGCAGAATTTGTGAACCTGGTATAGGTATGAGGTGAGAGAGGCCAGGAGGTCTGGCTG  
CTCCCCCTCTAGACTTCGCAGGTAAAACCCAAGGTGTGTGCCACGTAAAGGTTAGAG  
GTTTTATAGGCATCCAGATAGCAC

>2497

ATAGGTATGAGGTGAGAGAGGCCAGGAGGTCTGGCTGCTCCCCCTCTAGACTTCGCAG  
GTAAAACCCAAGGTGTGTGCCACGTAAAGGTTAGAGGTTTTATAGGCATCCAGATAG  
CACATGTGGGTCTCTGCCCTGCT

>2498

GAGGCCAGGAGGTCTGGCTGCTCCCCCTCTAGACTTCGCAGGTAAAACCCAAGGTGT  
GTGCCACGTAAAGGTTAGAGGTTTTATAGGCATCCAGATAGCACATGTGGGTCTCTGC  
CCCTGCTTGCAGCCTCCCTGGGGC

>2499

AGGAGGTCTGGCTGCTCCCCCTCTAGACTTCGCAGGTAAAACCCAAGGTGTGTGCCAC  
GTAAAGGTTAGAGGTTTTATAGGCATCCAGATAGCACATGTGGGTCTCTGCCCTGCT  
TGCAGCCTCCCTGGGGCAGCCAG

>2500

CTGCTCCCCCTCTAGACTTCGCAGGTAAAACCCAAGGTGTGTGCCACGTAAAGGTTCA  
GAGGTTTTATAGGCATCCAGATAGCACATGTGGGTCTCTGCCCTGCTTGCAGCCTCCC  
TGGGGCAGCCAGCCAGGCTCAGG

>2501

TGCCACGTAAAGGTTAGAGGTTTTATAGGCATCCAGATAGCACATGTGGGTCTCTGCC  
CCTGCTTGCAGCCTCCCTGGGGCAGCCAGCCAGGCTCAGGGCAGGAAGCTGCTGATT  
CTGGGTCACTTGGCTGCTCTTGCT

>2502

TCAGAGGTTTTATAGGCATCCAGATAGCACATGTGGGTCTCTGCCCTGCTTGCAGCCT  
CCCTGGGGCAGCCAGCCAGGCTCAGGGCAGGAAGCTGCTGATTCTGGGTCACTTGGC  
TGCTCTTGCTTGTGCTGCTGTGA

>2503

TTTATAGGCATCCAGATAGCACATGTGGGTCTCTGCCCTGCTTGCAGCCTCCCTGGGG  
CAGCCAGCCAGGCTCAGGGCAGGAAGCTGCTGATTCTGGGTCACTTGGCTGCTCTTGC  
TTGCTGCTGCTGTGATTGTTCCCT

>2504

AGGGCAGGAAGCTGCTGATTCTGGGTCACTTGGCTGCTCTTGGCTGCTGCTGTGA  
TTGTTCCCTACAGTTAAGATCTTAGCTCCATAAGGGACATACGGAGGTCATCTAGGTCAT  
CTCATGGCTCTCAGGCAAGAAAA

>2505

AGGAAGCTGCTGATTCTGGGTCACTTGGCTGCTCTTGGCTGCTGCTGTGATTGTTT  
CTACAGTTAAGATCTTAGCTCCATAAGGGACATACGGAGGTCATCTAGGTCATCTCATG  
GCTCTCAGGCAAGAAAAGTAGC

>2506

TGGGTCACTTGGCTGCTCTTGGCTGCTGCTGTGATTGTTCCCTACAGTTAAGATCTTA  
GCTCCATAAGGGACATACGGAGGTCATCTAGGTCATCTCATGGCTCTCAGGCAAGAAA  
AGTAGCATTATTGCTCTCATGC

>2507

CTGCTCTTGGCTGCTGCTGTGATTGTTCCCTACAGTTAAGATCTTAGCTCCATAAGGG  
ACATACGGAGGTCATCTAGGTCATCTCATGGCTCTCAGGCAAGAAAAGTAGCATTATTG  
CTCTCATGCCCACTTTATGGA

>2508

CTTGTGCTGCTGTGATTGTTCCCTACAGTTAAGATCTTAGCTCCATAAGGGACATACGG  
AGGTCATCTAGGTCATCTCATGGCTCTCAGGCAAGAAAAGTAGCATTATTGCTCTCATG  
CCCACTTTATGGATAAGTGACC

>2509

TTCCCTACAGTTAAGATCTTAGCTCCATAAGGGACATACGGAGGTCATCTAGGTCATCTCA  
TGGCTCTCAGGCAAGAAAAGTAGCATTATTGCTCTCATGCCCACTTTATGGATAAGTGA  
CCGAGGCCTGCAGAGGCAGAG

>2510

TCTAGGTCATCTCATGGCTCTCAGGCAAGAAAAGTAGCATTATTGCTCTCATGCCCACT  
TTATGGATAAGTGACCGAGGCCTGCAGAGGCAGAGTGGCTATTCCAGCCATTAATGT  
GGCTCCCTGCTATTCTGTTCCCT

>2511

ATCTCATGGCTCTCAGGCAAGAAAAGTAGCATTATTGCTCTCATGCCCACTTTATGGATA  
AGTGACCGAGGCCTGCAGAGGCAGAGTGGCTATTCCAGCCATTAATGTGGCTCCCTG  
CTATTCTGTTCCCTGCCAGGAT

>2512

GCATTATTGCTCTCATGCCCACTTTATGGATAAGTGACCGAGGCCTGCAGAGGCAGAGT  
GGCTATTCCAGCCATTAATGTGGCTCCCTGCTATTCTGTTCCCTGCCAGGATATTCTGT  
GGATGGTTAGGGGAGGGGTCT

>2513

GAGGCCTGCAGAGGCAGAGTGGCTATTCCAGCCATTAATGTGGCTCCCTGCTATTCTG  
TTCCCTGCCAGGATATTCTGTGGATGGTTAGGGGAGGGGTCTTACCTCAGCTAACGAGG  
TGCATTTTCTGTGGGGTGAGGC

>2514

GGCTATTCCAGCCATTAATGTGGCTCCCTGCTATTCTGTTCCCTGCCAGGATATTCTGT

GGATGGTTAGGGGAGGGTCTTACCTCAGCTAACGAGGTGCATTTTCTGTGGGGTGAG  
GCCATTCTTGCACTTAGGTGT

>2515

TTCCAGCCATTAAATGTGGCTCCCTGCTATTCTGTTCCCTGCCAGGATATTCTGTGGATG  
GTTAGGGGAGGGTCTTACCTCAGCTAACGAGGTGCATTTTCTGTGGGGTGAGGCCAT  
TCTTGCACTTAGGTGTCTGAG

>2516

TGTGGCTCCCTGCTATTCTGTTCCCTGCCAGGATATTCTGTGGATGGTTAGGGGAGGGG  
TCTTACCTCAGCTAACGAGGTGCATTTTCTGTGGGGTGAGGCCATTCTTGCACTTAGG  
TGTCTGAGGCCTGATGGTGTG

>2517

AGGATATTCTGTGGATGGTTAGGGGAGGGTCTTACCTCAGCTAACGAGGTGCATTTTC  
TGTGGGGTGAGGCCATTCTTGCACTTAGGTGTCTGAGGCCTGATGGTGTGGGGAAT  
GTCCTGGTTCTATTCCCAGGGCT

>2518

TTAGGGGAGGGTCTTACCTCAGCTAACGAGGTGCATTTTCTGTGGGGTGAGGCCATT  
CTTGCACTTAGGTGTCTGAGGCCTGATGGTGTGGGGAATGTCCTGGTTCTATTCCCA  
GGGCTGTAACTGGGGGAAGGAT

>2519

GGGTCTTACCTCAGCTAACGAGGTGCATTTTCTGTGGGGTGAGGCCATTCTTGCACTT  
AGGTGTCTGAGGCCTGATGGTGTGGGGAATGTCCTGGTTCTATTCCCAGGGCTGTAA  
GTGGGGGAAGGATGGAGGAAGA

>2520

TGAGGCCATTCTTGCACTTAGGTGTCTGAGGCCTGATGGTGTGGGGAATGTCCTGGT  
TCTATTCCCAGGGCTGTAACTGGGGGAAGGATGGAGGAAGACAGAATGGCCTCTGG  
AACTTTTGGATCTTTCTGAGTTGA

>2521

TAGGTGTCTGAGGCCTGATGGTGTGGGGAATGTCCTGGTTCTATTCCCAGGGCTGTAA  
CGTGGGGGAAGGATGGAGGAAGACAGAATGGCCTCTGGAACCTTTGGATCTTTCTGA  
GTTGAGGCCTGTCTGGCCAACTC

>2522

CTGAGGCCTGATGGTGTGGGGAATGTCCTGGTTCTATTCCCAGGGCTGTAACTGGG  
GGAAGGATGGAGGAAGACAGAATGGCCTCTGGAACCTTTGGATCTTTCTGAGTTGAGG  
CCTTGCTGGCCAACTCCGGGAGG

>2523

CCAGGGCTGTAACTGGGGGAAGGATGGAGGAAGACAGAATGGCCTCTGGAACCTTT  
GGATCTTTCTGAGTTGAGGCCTTGTCTGGCCAACTCCGGGAGGCTGCTGGCATGGCAA  
GCAGGGTAGGGATGCCTGGCCTAGC

>2524

GCTGTAACTGGGGGAAGGATGGAGGAAGACAGAATGGCCTCTGGAACCTTTGGATC  
TTTCTGAGTTGAGGCCTTGTCTGGCCAACTCCGGGAGGCTGCTGGCATGGCAAGCAGG  
GTAGGGATGCCTGGCCTAGCCAGG

>2525

GGAAGACAGAATGGCCTCTGGAACCTTTGGATCTTTCTGAGTTGAGGCCTTGTCTGGC  
CAACTCCGGGAGGCTGCTGGCATGGCAAGCAGGGTAGGGATGCCTGGCCTAGCCAGG  
GGAGCTCCCTCTCCCCTCTGCTG

>2526

CTGGAAC TTTTGGATCTTTCTGAGTTGAGGCCTTGCTGGCCAACTCCGGGAGGCTGC  
TGGCATGGCAAGCAGGGTAGGGATGCCTGGCCTAGCCAGGGGAGCTCCCTCTCTCCCC  
TCTGCTGCCCCCTTTTCCACCCCC

>2527

GTTGAGGCCTTGCTGGCCAACTCCGGGAGGCTGCTGGCATGGCAAGCAGGGTAGGG  
ATGCCTGGCCTAGCCAGGGGAGCTCCCTCTCTCCCCTCTGCTGCCCCCTTTTCCACCCC  
CATCATAAACACGTGTGGACTTTC

>2528

AGGCCTTGCTGGCCAACTCCGGGAGGCTGCTGGCATGGCAAGCAGGGTAGGGATGC  
CTGGCCTAGCCAGGGGAGCTCCCTCTCTCCCCTCTGCTGCCCCCTTTTCCACCCCCATC  
ATAAACACGTGTGGACTTTCTGGT

>2529

TCCCTCTCTCCCCTCTGCTGCCCCCTTTTCCACCCCCATCATAAACACGTGTGGACTTTC  
TGGTGGTGAGAAGATGGTTTTGGAGGGCTGGGCTGAGGTCTAGGCAGGCAAGAGCTT  
CCAAATGTGTGGCTTTGATTCTC

>2530

CTCTCTCCCCTCTGCTGCCCCCTTTTCCACCCCCATCATAAACACGTGTGGACTTTCTG  
GTGGTGAGAAGATGGTTTTGGAGGGCTGGGCTGAGGTCTAGGCAGGCAAGAGCTTCC  
AAATGTGTGGCTTTGATTCTCAGC

>2531

CCCCATCATAAACACGTGTGGACTTTCTGGTGGTGAGAAGATGGTTTTGGAGGGCTGG  
GCTGAGGTCTAGGCAGGCAAGAGCTTCCAAATGTGTGGCTTTGATTCTCAGCCTTTTCA  
TCCCTCAATCCTGGGAGACTCAT

>2532

ATCATAAACACGTGTGGACTTTCTGGTGGTGAGAAGATGGTTTTGGAGGGCTGGGCTG  
AGGTCTAGGCAGGCAAGAGCTTCCAAATGTGTGGCTTTGATTCTCAGCCTTTTCATCCC  
TCAATCCTGGGAGACTCATTTTA

>2533

ACACGTGTGGACTTTCTGGTGGTGAGAAGATGGTTTTGGAGGGCTGGGCTGAGGTCTA  
GGCAGGCAAGAGCTTCCAAATGTGTGGCTTTGATTCTCAGCCTTTTCATCCCTCAATCC  
TGGGAGACTCATTTTAAACTTA

>2534

GATGGTTTTGGAGGGCTGGGCTGAGGTCTAGGCAGGCAAGAGCTTCCAAATGTGTGGC  
TTTGATTCTCAGCCTTTTCATCCCTCAATCCTGGGAGACTCATTTTAAACTTAAAAAA  
GGACTTCATTCTATTGGATGCTA

>2535

GTCTAGGCAGGCAAGAGCTTCCAAATGTGTGGCTTTGATTCTCAGCCTTTTCATCCCTC  
AATCCTGGGAGACTCATTTTAAACTTAAAAAAGGACTTCATTCTATTGGATGCTATGT  
GGCAGGCCCTGGGCTGTTGTA

>2536

AATGTGTGGCTTTGATTCTCAGCCTTTTCATCCCTCAATCCTGGGAGACTCATTTTAAAA  
CTTAAAAAAGGACTTCATTCTATTGGATGCTATGTGGCAGGCCCTGGGCTGTTGTAGA  
GAGGCCTGAAACCACTTCAG

>2537

CCCTCAATCCTGGGAGACTCATTTTAAACTTAAAAAAGGACTTCATTCTATTGGATGC

TATGTGGGCAGGCCCTGGGCTGTTGTAGAGAGGCCTGAAACCCACTTCAGTTTCCTGG  
ACAGGCTGGGAGTGTGTACCCAT

>2538

CTCATTTTAAAACCTAAAAAAGGACTTCATTCTATTGGATGCTATGTGGGCAGGCCCTG  
GGCTGTTGTAGAGAGGCCTGAAACCCACTTCAGTTTCCTGGACAGGCTGGGAGTGTGT  
ACCCATGGGTTCCCTGCTGCCCT

>2539

GACTTCATTCTATTGGATGCTATGTGGGCAGGCCCTGGGCTGTTGTAGAGAGGCCTGAA  
ACCCACTTCAGTTTCCTGGACAGGCTGGGAGTGTGTACCCATGGGTTCCCTGCTGCCCT  
ATTCCTGGAAGACTAATATC

>2540

TATGTGGGCAGGCCCTGGGCTGTTGTAGAGAGGCCTGAAACCCACTTCAGTTTCCTGG  
ACAGGCTGGGAGTGTGTACCCATGGGTTCCCTGCTGCCCTATTCCTGGAAGACTAAT  
ATCCCTCCAAACTCTTGTTGG

>2541

ACCCACTTCAGTTTCCTGGACAGGCTGGGAGTGTGTACCCATGGGTTCCCTGCTGCCCT  
ATTCCTGGAAGACTAATATCCCTCCAAACTCTTGTTGGTTTCTGCTTTTTTTCTGT  
AGCATTTTGTCTTTGTGGGAA

>2542

GCTGCCCTATTCCTGGAAGACTAATATCCCTCCAAACTCTTGTTGGTTTCTGCTTT  
TTTTCTGTAGCATTTTGTCTTTGTGGGAAATTTAAGAAACATATGTATGGCTTTTTGGT  
TTCCACTATTTATTTCC

>2543

TCTTTGTGGGAAATTTAAGAAACATATGTATGGCTTTTTGGTTTCCACTTATTTATTTTC  
CCCTCTGAGTTTCAGATTCATCCTTCTCCACCCCTTCCCCCTGCCCTAAGGTGGGGCT  
AGTGCAAATCGCAGTGTGTG

>2544

TGGGAAATTTAAGAAACATATGTATGGCTTTTTGGTTTCCACTTATTTATTTTCCCTCT  
GAGTTTCAGATTCATCCTTCTCCACCCCTTCCCCCTGCCCTAAGGTGGGGCTAGTGCA  
AATCGCAGTGTGTGTAGT

>2545

TTTCCACTTATTTATTTTCCCTCTGAGTTTCAGATTCATCCTTCTCCACCCCTTCCCC  
TGCCCTAAGGTGGGGCTAGTGCAAATCGCAGTGTGTGTAGTGGGATGGTTAAAGAG  
CCGTACATCCTCACACCTGGT

>2546

TTTATTTTCCCTCTGAGTTTCAGATTCATCCTTCTCCACCCCTTCCCCCTGCCCTAAG  
GTGGGGCTAGTGCAAATCGCAGTGTGTGTAGTGGGATGGTTAAAGAGCCGTACATC  
CTCACACCTGGTGACGCAGACT

>2547

GATTCATCCTTCTCCACCCCTTCCCCCTGCCCTAAGGTGGGGCTAGTGCAAATCGCAG  
TGTGTGTAGTGGGATGGTTAAAGAGCCGTACATCCTCACACCTGGTGACGCAGACT  
AAGGCAATTAACCTTCTTTAGTA

>2548

CCACCCCTTCCCCCTGCCCTAAGGTGGGGCTAGTGCAAATCGCAGTGTGTGTAGTG  
GGATGGTTAAAGAGCCGTACATCCTCACACCTGGTGACGCAGACTAAGGCAATTAACC  
TTCTTTAGTAAAGACCCTTTCAGC



>2549

TAGTGCAAATCGCAGTGTGTGTAGTGGGATGGTTAAAGAGCCGTACATCCTCACAC  
CTGGTGACGCAGACTAAGGCAATTAACCTTCTTTAGTAAAGACCCTTTCAGCTGGGTG  
CGGTGGGAGGCACTTCGGGAGGCC

>2550

AGTGGGATGGTTAAAGAGCCGTACATCCTCACACCTGGTGACGCAGACTAAGGCAATT  
AACCTTCTTTAGTAAAGACCCTTTCAGCTGGGTGCGGTGGGAGGCACTTCGGGAGGCC  
GAGGTGGAAGGATTGCTTGAGCCC

>2551

GATGGTTAAAGAGCCGTACATCCTCACACCTGGTGACGCAGACTAAGGCAATTAACCT  
TCTTTAGTAAAGACCCTTTCAGCTGGGTGCGGTGGGAGGCACTTCGGGAGGCCGAGGT  
GGAAGGATTGCTTGAGCCCTGGAG

>2552

CACCTGGTGACGCAGACTAAGGCAATTAACCTTCTTTAGTAAAGACCCTTTCAGCTGG  
GTGCGGTGGGAGGCACTTCGGGAGGCCGAGGTGGAAGGATTGCTTGAGCCCTGGAGT  
TGGAGACCAGCTTGGGCAGCATGGT

>2553

AAGGCAATTAACCTTCTTTAGTAAAGACCCTTTCAGCTGGGTGCGGTGGGAGGCACTT  
CGGGAGGCCGAGGTGGAAGGATTGCTTGAGCCCTGGAGTTGGAGACCAGCTTGGGCA  
GCATGGTGAAACCACCTCTCTAAAA

>2554

TTAACCTTCTTTAGTAAAGACCCTTTCAGCTGGGTGCGGTGGGAGGCACTTCGGGAGG  
CCGAGGTGGAAGGATTGCTTGAGCCCTGGAGTTGGAGACCAGCTTGGGCAGCATGGT  
GAAACCACCTCTCTAAAAAATATA

>2555

TAGTAAAGACCCTTTCAGCTGGGTGCGGTGGGAGGCACTTCGGGAGGCCGAGGTGGA  
AGGATTGCTTGAGCCCTGGAGTTGGAGACCAGCTTGGGCAGCATGGTGAAACCACCT  
CTCTAAAAAATATAAAAAATTAACGG

>2556

TCAGCTGGGTGCGGTGGGAGGCACTTCGGGAGGCCGAGGTGGAAGGATTGCTTGAGC  
CCTGGAGTTGGAGACCAGCTTGGGCAGCATGGTGAAACCACCTCTCTAAAAAATATA  
AAAATTAACGGGACGTTGTGGCATG

>2557

GGCAGCATGGTGAAACCACCTCTCTAAAAAATATAAAAAATTAACGGGACGTTGTGGC  
ATGCACCTATAGTCCCAGCTACTTGGGAGGCTGGGGCGCGAGAAGTGCTTGAACCTGA  
GAGATGGAGACTGCGGTGAGGCGA

>2558

ATGGTGAAACCACCTCTCTAAAAAATATAAAAAATTAACGGGACGTTGTGGCATGCAC  
CTATAGTCCCAGCTACTTGGGAGGCTGGGGCGCGAGAAGTGCTTGAACCTGAGAGATG  
GAGACTGCGGTGAGGCGAGATTGC

>2559

ACCTCTCTAAAAAATATAAAAAATTAACGGGACGTTGTGGCATGCACCTATAGTCCCAG  
CTACTTGGGAGGCTGGGGCGCGAGAAGTGCTTGAACCTGAGAGATGGAGACTGCGGT  
GAGGCGAGATTGCACCACTGCACT

>2560

AATATAAAAAATTAACGGGACGTTGTGGCATGCACCTATAGTCCCAGCTACTTGGGAGGC

TGGGGCGCGAGAAGTGCTTGAACCTGAGAGATGGAGACTGCGGTGAGGCGAGATTGC  
ACCACTGCACTTCAGCTAGGTGAC

>2561

GACGTTGTGGCATGCACCTATAGTCCCAGCTACTTGGGAGGCTGGGGCGCGAGAAGTG  
CTTGAACCTGAGAGATGGAGACTGCGGTGAGGCGAGATTGCACCACTGCACTTCAGCT  
AGGTGACAGAGTGGGACCCTGTCT

>2562

CCCAGCTACTTGGGAGGCTGGGGCGCGAGAAGTGCTTGAACCTGAGAGATGGAGACT  
GCGGTGAGGCGAGATTGCACCACTGCACTTCAGCTAGGTGACAGAGTGGGACCCTGT  
CTCAAAACAAAACAAAACAACAA

>2563

GGGCGCGAGAAGTGCTTGAACCTGAGAGATGGAGACTGCGGTGAGGCGAGATTGCAC  
CACTGCACTTCAGCTAGGTGACAGAGTGGGACCCTGTCTCAAAACAAAACAAAACA  
CAACAAAAAAGCATGTTTTCTGTCT

>2564

GTGCTTGAACCTGAGAGATGGAGACTGCGGTGAGGCGAGATTGCACCACTGCACTTC  
AGCTAGGTGACAGAGTGGGACCCTGTCTCAAAACAAAACAAAACAACAAAAA  
AGCATGTTTTCTGTCTTTCCCTTCT

>2565

CCACTGCACTTCAGCTAGGTGACAGAGTGGGACCCTGTCTCAAAACAAAACAAAACA  
ACAACAAAAAAGCATGTTTTCTGTCTTTCCCTTCTCTCCACCCCTGGCATGA  
ACTCTCAACTCTTAGCCTGTGGAT

>2566

CAAAAAAAGCATGTTTTCTGTCTTTCCCTTCTCTCCACCCCTGGCATGAACTC  
TCAACTCTTAGCCTGTGGATGTCCGTTTCTATAAATGCTGGTGCTCGGTGGTCACCGTA  
GACGTCCGAGCAGCCCCTGGGG

>2567

GCATGAACTCTCAACTCTTAGCCTGTGGATGTCCGTTTCTATAAATGCTGGTGCTCGGT  
GGTCACCGTAGACGTCCGAGCAGCCCCTGGGGCTTTGGCTTGTGTTTTCTCTGTACTTG  
TGAGGGTGGTTGCCACTTCTGG

>2568

CTCAACTCTTAGCCTGTGGATGTCCGTTTCTATAAATGCTGGTGCTCGGTGGTCACCGT  
AGACGTCCGAGCAGCCCCTGGGGCTTTGGCTTGTGTTTTCTCTGTACTTGTGAGGGTG  
GTTGCCACTTCTGGCCTTCTTTG

>2569

GCTCGGTGGTCACCGTAGACGTCCGAGCAGCCCCTGGGGCTTTGGCTTGTGTTTTCTC  
TGACTTGTGAGGGTGGTTGCCACTTCTGGCCTTCTTTGTGCTTCTTTTTCTTTCCCTT  
CCCAATCTTTTGTTCCTCCCT

>2570

CAATCTTTTGTTCCTCCCTCCCTCCCTCCCTCCCTCCCTCCCTCCCTCCCTTCTGCTTTCC  
TGTTTAAAGTATATGGCTGCACCTAGCATGACACAGTTCCTATTTATTCCTCAGACTTGC  
TGGGACAGTCTCCTCTGTA

>2571

CTCCCTCCCTCCCTCCCTCCCTCCCTCCCTCCCTCCCTCCCTCCCTCCCTCCCTCCCT  
TGCACCTAGCATGACACAGTTCCTATTTATTCCTCAGACTTGTGAGGGTCTCCTCT  
GTATGCGGCGACTGAGGGTG

>2572

CCCTCCCTTCCTCCCTTCCTTCCTTCTGCTTTCCTGTTTAAAGTATATGGCTGCACCTAG  
CATGACACAGTTCCTATTTATTCCTCAGACTTGCTGGGACAGTCTCCTCTGTATGCGGC  
GACTGAGGGTGGGTTCCAGTG

>2573

CCTGTTTAAAGTATATGGCTGCACCTAGCATGACACAGTTCCTATTTATTCCTCAGACTT  
GCTGGGACAGTCTCCTCTGTATGCGGCGACTGAGGGTGGGTTCCAGTGCCCCAGCCCA  
CTCCCCTTCCCCTGTTTTTGT

>2574

CTAGCATGACACAGTTCCTATTTATTCCTCAGACTTGCTGGGACAGTCTCCTCTGTATGC  
GGCGACTGAGGGTGGGTTCCAGTGCCCCAGCCCACTCCCCTTCCCCTGTTTTTGTCC  
ACTTGGCTGGACAAAGAGAACA

>2575

AGTTCCTATTTATTCCTCAGACTTGCTGGGACAGTCTCCTCTGTATGCGGCGACTGAGG  
GTGGGTTCCAGTGCCCCAGCCCACTCCCCTTCCCCTGTTTTTGTCCACTTGGCTGGAC  
AAAGAGAACAAAACCAAATGGC

>2576

ACTGAGGGTGGGTTCCAGTGCCCCAGCCCACTCCCCTTCCCCTGTTTTTGTCCACTTG  
GCTGGACAAAGAGAACAAAACCAAATGGCCTCCCCTCCCCTCTCCTAAACCGGTCA  
AGCAGTGGTATTCTGGGATGATTT

>2577

TGAGGGTGGGTTCCAGTGCCCCAGCCCACTCCCCTTCCCCTGTTTTTGTCCACTTGGC  
TGGACAAAGAGAACAAAACCAAATGGCCTCCCCTCCCCTCTCCTAAACCGGTCAAG  
CAGTGGTATTCTGGGATGATTTTC

>2578

TTGTCCACTTGGCTGGACAAAGAGAACAAAACCAAATGGCCTCCCCTCCCCTCTCCT  
AAACCGGTCAAGCAGTGGTATTCTGGGATGATTTCCCTGCAACCATTAAACAAGTGC  
TTTGATGCTTACGAGTCATTGGA

>2579

TCCACTTGGCTGGACAAAGAGAACAAAACCAAATGGCCTCCCCTCCCCTCTCCTAAA  
CCGGTCAAGCAGTGGTATTCTGGGATGATTTCCCTGCAACCATTAAACAAGTGCTTT  
GATGCTTACGAGTCATTGGAATG

>2580

CCTCCCCTCTCCTAAACCGGTCAAGCAGTGGTATTCTGGGATGATTTCCCTGCAACC  
ATTTAAACAAGTGCTTTGATGCTTACGAGTCATTGGAATGACCAGGCCTGTGCGCCCCT  
TCTCACTGACACCCTTAGACCA

>2581

CGGTCAAGCAGTGGTATTCTGGGATGATTTCCCTGCAACCATTAAACAAGTGCTTTG  
ATGCTTACGAGTCATTGGAATGACCAGGCCTGTGCGCCCCTTCTCACTGACACCCTTAG  
ACCAGGCTGGGCCTCACCTTT

>2582

TTCTGGGATGATTTCCCTGCAACCATTAAACAAGTGCTTTGATGCTTACGAGTCATTG  
GAATGACCAGGCCTGTGCGCCCCTTCTCACTGACACCCTTAGACCAGGCTGGGCCTCA  
CCTTTTGTCTTGCTGCCCTC

>2583

CAAGTGCTTTGATGCTTACGAGTCATTGGAATGACCAGGCCTGTGCGCCCCTTCTCACT

GACACCCTTAGACCAGGCTGGGCCTCACCCCTTTGTCTTGCTGCCCTCGGTGCCAG  
TGGGCGTGGGCAGTAGGACTGAG

>2584

GCTTTGATGCTTACGAGTCATTGGAATGACCAGGCTGTGCGCCCTTCTCACTGACAC  
CCTTAGACCAGGCTGGGCCTCACCCCTTTGTCTTGCTGCCCTCGGTGCCAGTGGGC  
GTGGGCAGTAGGACTGAGCAGAG

>2585

CCCCTTCTACTGACACCCTTAGACCAGGCTGGGCCTCACCCCTTTGTCTTGCTGCCCT  
TCGGTGCCAGTGGGCGTGGGCAGTAGGACTGAGCAGAGGGGCCGAGGCTGTGCTGG  
CCGGCAGCTCTGTTACAGTAGAGT

>2586

ACACCCTTAGACCAGGCTGGGCCTCACCCCTTTGTCTTGCTGCCCTCGGTGCCAGT  
GGGCGTGGGCAGTAGGACTGAGCAGAGGGGCCGAGGCTGTGCTGGCCGGCAGCTCTG  
TTACAGTAGAGTGAAGGAGGTCCC

>2587

CCCTTAGACCAGGCTGGGCCTCACCCCTTTGTCTTGCTGCCCTCGGTGCCAGTGGG  
CGTGGGCAGTAGGACTGAGCAGAGGGGCCGAGGCTGTGCTGGCCGGCAGCTCTGTTA  
CAGTAGAGTGAAGGAGGTCCCGGC

>2588

AGGCTGGGCCTCACCCCTTTGTCTTGCTGCCCTCGGTGCCAGTGGGCGTGGGCAGT  
AGGACTGAGCAGAGGGGCCGAGGCTGTGCTGGCCGGCAGCTCTGTTACAGTAGAGTG  
GAAGGAGGTCCCGGCCAGAGGGGCA

>2589

TGCCCTCGGTGCCAGTGGGCGTGGGCAGTAGGACTGAGCAGAGGGGCCGAGGCTG  
TGCTGGCCGGCAGCTCTGTTACAGTAGAGTGAAGGAGGTCCCGGCCAGAGGGGCAG  
GTCAAACAGGCCTCTTTATTACAG

>2590

CAGTGGGCGTGGGCAGTAGGACTGAGCAGAGGGGCCGAGGCTGTGCTGGCCGGCAG  
CTCTGTTACAGTAGAGTGAAGGAGGTCCCGGCCAGAGGGGCAGGTCAAACAGGCCT  
CTTTATTACAGTGCTCTCTTTCACG

>2591

GTGGGCGTGGGCAGTAGGACTGAGCAGAGGGGCCGAGGCTGTGCTGGCCGGCAGCTC  
TGTTACAGTAGAGTGAAGGAGGTCCCGGCCAGAGGGGCAGGTCAAACAGGCCTCTT  
TTATTACAGTGCTCTCTTTCACGGC

>2592

GTGGGCAGTAGGACTGAGCAGAGGGGCCGAGGCTGTGCTGGCCGGCAGCTCTGTTAC  
AGTAGAGTGAAGGAGGTCCCGGCCAGAGGGGCAGGTCAAACAGGCCTCTTTATT  
ACAGTGCTCTCTTTCACGGCCTCACT

>2593

TGAGCAGAGGGGCCGAGGCTGTGCTGGCCGGCAGCTCTGTTACAGTAGAGTGAAGG  
AGGTCCCGGCCAGAGGGGCAGGTCAAACAGGCCTCTTTATTACAGTGCTCTCTTTC  
ACGGCCTCACTGAAACAGGAGACCC

>2594

GCTGTGCTGGCCGGCAGCTCTGTTACAGTAGAGTGAAGGAGGTCCCGGCCAGAGGG  
GCAGGTCAAACAGGCCTCTTTATTACAGTGCTCTCTTTCACGGCCTCACTGAAACAG  
GAGACCCGAGAGGCTCCGGTGAAG

>2595

CGGCCAGAGGGGCAGGTCAAACAGGCCTCTTTTATTACAGTGCTCTTTTCACGGCC  
TCACTGAAACAGGAGACCCGAGAGGCTCCGGTGAAAGGGCACTGTGTTTGTGCATT  
AGGCCTCCAGGGCTGGCTACAAAG

>2596

CCAGAGGGGCAGGTCAAACAGGCCTCTTTTATTACAGTGCTCTTTTCACGGCCTCA  
CTGAAACAGGAGACCCGAGAGGCTCCGGTGAAAGGGCACTGTGTTTGTGCATT  
CCTTCCAGGGCTGGCTACAAAGGTG

>2597

CTTTCACGGCCTCACTGAAACAGGAGACCCGAGAGGCTCCGGTGAAAGGGCACTGTG  
TTTGTGCATTACAGGCCTTCCAGGGCTGGCTACAAAGGTGGGGGCACCCGGAGCACTGA  
AGGGGCTTTTTGTGCATTGGCAGTTT

>2598

CCTCACTGAAACAGGAGACCCGAGAGGCTCCGGTGAAAGGGCACTGTGTTTGTGCAT  
TCAGGCCTTCCAGGGCTGGCTACAAAGGTGGGGGCACCCGGAGCACTGAAGGGGCT  
TTTGTGCATTGGCAGTTTGGCTTAGGG

>2599

CGGTGAAAGGGCACTGTGTTTGTGCATTACAGGCCTTCCAGGGCTGGCTACAAAGGTGG  
GGGCACCCGGAGCACTGAAGGGGCTTTTTGTGCATTGGCAGTTTGGCTTAGGGGAGAA  
GCGAGGGAGAGCCAGTGTGGGAGCC

>2600

GGGCACTGTGTTTGTGCATTACAGGCCTTCCAGGGCTGGCTACAAAGGTGGGGGCACCC  
GGAGCACTGAAGGGGCTTTTTGTGCATTGGCAGTTTGGCTTAGGGGAGAAGCGAGGGA  
GAGCCAGTGTGGGAGCCGCCTCTAG

>2601

CAGGCCTTCCAGGGCTGGCTACAAAGGTGGGGGCACCCGGAGCACTGAAGGGGCTTT  
TTGTGCATTGGCAGTTTGGCTTAGGGGAGAAGCGAGGGAGAGCCAGTGTGGGAGCCGC  
CTCTAGGATTGTGAGCAAGTGCCTGT

>2602

AGGGCTGGCTACAAAGGTGGGGGCACCCGGAGCACTGAAGGGGCTTTTTGTGCATTGG  
CAGTTTGGCTTAGGGGAGAAGCGAGGGAGAGCCAGTGTGGGAGCCGCCTCTAGGATT  
GTGAGCAAGTGCCTGTTTAGACAGCT

>2603

AGCACTGAAGGGGCTTTTTGTGCATTGGCAGTTTGGCTTAGGGGAGAAGCGAGGGAGA  
GCCAGTGTGGGAGCCGCCTCTAGGATTGTGAGCAAGTGCCTGTTTAGACAGCTCCACG  
CTGCTCCTTAAACCTATTTTGTGG

>2604

GGGCTTTTTGTGCATTGGCAGTTTGGCTTAGGGGAGAAGCGAGGGAGAGCCAGTGTGG  
GAGCCGCCTCTAGGATTGTGAGCAAGTGCCTGTTTAGACAGCTCCACGCTGCTCCTTA  
AAACCTATTTTGTGGTCTGGGGTTG

>2605

GTCATTGGCAGTTTGGCTTAGGGGAGAAGCGAGGGAGAGCCAGTGTGGGAGCCGCCT  
CTAGGATTGTGAGCAAGTGCCTGTTTAGACAGCTCCACGCTGCTCCTTAAACCTATTT  
TGTGGTCTGGGGTTGGGGCGGGGG

>2606

GCTTAGGGGAGAAGCGAGGGAGAGCCAGTGTGGGAGCCGCCTCTAGGATTGTGAGCA

AGTGCCTGTTTAGACAGCTCCACGCTGCTCCTTAAAACCTATTTTGTGGTCTGGGGTTG  
GGGCGGGGGCACACTGCCTCGATC

>2607

CCTTAAAACCTATTTTGTGGTCTGGGGTTGGGGCGGGGGCACACTGCCTCGATCCTCTT  
GTTGTGTGGAGCAAAGTGATTCTCTCTTCTTGTGTTCTCCAGATGGTTCGTTGCCT  
CACATCCATTGTGGTTGAGGAT

>2608

AAACCTATTTTGTGGTCTGGGGTTGGGGCGGGGGCACACTGCCTCGATCCTCTTGTGT  
GTGGAGCAAAGTGATTCTCTCTTCTTGTGTTCTCCAGATGGTTCGTTGCCTCACAT  
CCATTGTGGTTGAGGATACAGT

>2609

GCGGGGGCACACTGCCTCGATCCTCTTGTGTGTGGAGCAAAGTGATTCTCTCTTCTT  
GTGTTCTCCAGATGGTTCGTTGCCTCACATCCATTGTGGTTGAGGATACAGTGCAGA  
GAAGACCCCGCTGCCTCTGCT

>2610

GAGCAAAGTGATTCTCTCTTCTTGTGTTCTCCAGATGGTTCGTTGCCTCACATCCAT  
TGTGGTTGAGGATACAGTGCAGAGAAGACCCCGCTGCCTCTGCTCCCCCTCCTTTTCT  
CTCAAAGAGAAGTTTCAGGG

>2611

GTGATTCTCTCTTCTTGTGTTCTCCAGATGGTTCGTTGCCTCACATCCATTGTGGTT  
GAGGATACAGTGCAGAGAAGACCCCGCTGCCTCTGCTCCCCCTCCTTTTCTCTCAA  
AGAGAAGTTTCAGGGACAGCAA

>2612

TCTTCTTGTGTTCTCCAGATGGTTCGTTGCCTCACATCCATTGTGGTTGAGGATACAG  
TGCAGAGAAGACCCCGCTGCCTCTGCTCCCCCTCCTTTTCTCAAAGAGAAGTTT  
CAGGGACAGCAATAGACTTCTG

>2613

CATTGTGGTTGAGGATACAGTGCAGAGAAGACCCCGCTGCCTCTGCTCCCCCTCCTTT  
TCTCTCAAAGAGAAGTTTCAGGGACAGCAATAGACTTCTGTGGGGCCTTTGTTCTT  
GTAGCTTTCATTTTCAATTCTT

>2614

TTGTGGTTGAGGATACAGTGCAGAGAAGACCCCGCTGCCTCTGCTCCCCCTCCTTTT  
TCTCAAAGAGAAGTTTCAGGGACAGCAATAGACTTCTGTGGGGCCTTTGTTCTTGT  
AGCTTTCATTTTCAATTCTTCT

>2615

AGGATACAGTGCAGAGAAGACCCCGCTGCCTCTGCTCCCCCTCCTTTTCTCTCAA  
GAGAAGTTTCAGGGACAGCAATAGACTTCTGTGGGGCCTTTGTTCTTGTAGCTTTCAT  
TTTTCAATTCTTCTTCCCTGT

>2616

CCTCCTTTTCTCTCAAAGAGAAGTTTCAGGGACAGCAATAGACTTCTGTGGGGCCTT  
TGTTCTTGTAGCTTTCATTTTCAATTCTTCTTCCCTGTATTATCTGTAGGCCTTA  
GTTTGTGCATCTCTAAAATGG

>2617

CTTCTGTGGGGCCTTTGTTCTTGTAGCTTTCATTTTCAATTCTTCTTCCCTGTATTA  
TCTTGTAGGCCTTAGTTTGTGCATCTCTAAAATGGGCTGGGAGGTGCTAGCCATACC  
TAATATATAGGGCCGTCGTA

>2618

GGGGCCTTTGTTCCCTGTAGCTTTCATTTTTCAATTCTTCTCTCCCTGTATTATCTTGCT  
AGGCCTTAGTTTGTGCATCTCTAAAATGGGCTGGGAGGTGCTAGCCCATACCTAATATAT  
AGGGCCGTCGTAAGGCTTA

>2619

TTTCAATTCTTCTCTCCCTGTATTATCTTGCTAGGCCTTAGTTTGTGCATCTCTAAAATG  
GGCTGGGAGGTGCTAGCCCATACCTAATATATAGGGCCGTCGTAAGGCTTAGGTCCCAT  
AACTCATGGGGTTGGCTTGC

>2620

TCTTCTTCTCCCTGTATTATCTTGCTAGGCCTTAGTTTGTGCATCTCTAAAATGGGCTGG  
GAGGTGCTAGCCCATACCTAATATATAGGGCCGTCGTAAGGCTTAGGTCCCATAACTCAT  
GGGGTTGGCTTGACAGGGC

>2621

ATCTTGCTAGGCCTTAGTTTGTGCATCTCTAAAATGGGCTGGGAGGTGCTAGCCCATAC  
CTAATATATAGGGCCGTCGTAAGGCTTAGGTCCCATAACTCATGGGGTTGGCTTGACA  
GGGCTCTCTCCTTTCAGACTGG

>2622

TAGCCCATACCTAATATATAGGGCCGTCGTAAGGCTTAGGTCCCATAACTCATGGGGTTG  
GCTTGACAGGGCTCTCCTTTCAGACTGGTCAGGCCATGGTCCTTTTATGAGTCTGA  
AGAGCCAAAATGAAGACCTCA

>2623

TATAGGGCCGTCGTAAGGCTTAGGTCCCATAACTCATGGGGTTGGCTTGACAGGGCTC  
TCTCCTTTCAGACTGGTCAGGCCATGGTCCTTTTATGAGTCTGAAGAGCCAAAATGAA  
GACCTCACTTTCTAGTATCCCA

>2624

ATAACTCATGGGGTTGGCTTGACAGGGCTCTCCTTTCAGACTGGTCAGGCCATGGT  
CCTTTTATGAGTCTGAAGAGCCAAAATGAAGACCTCACTTTCTAGTATCCCAATCTTC  
CTCCACCTTCCCTGGCTCTT

>2625

ATGGGGTTGGCTTGACAGGGCTCTCCTTTCAGACTGGTCAGGCCATGGTCCTTTTA  
TGAGTCTGAAGAGCCAAAATGAAGACCTCACTTTCTAGTATCCCAATCTTCTCCAC  
CTTCCCTGGCTCTTGAGGGTT

>2626

GCACAGGGCTCTCCTTTCAGACTGGTCAGGCCATGGTCCTTTTATGAGTCTGAAGA  
GCCAAAATGAAGACCTCACTTTCTAGTATCCCAATCTTCTCCACCTTCCCTGGCT  
CTTGAGGGTTCTTTGGGCATGTT

>2627

GAAGAGCCAAAATGAAGACCTCACTTTCTAGTATCCCAATCTTCTCCACCTTTCCC  
TGGCTCTGAGGGTTCTTTGGGCATGTTCCCTCTGGTCTCCATTATTATATAGGGAAGA  
GAAATTTCCAGAAGAATATT

>2628

TCCTCCACCTTCCCTGGCTCTTGAGGGTTCTTTGGGCATGTTCCCTCTGGTCTCCAT  
TATTATATAGGGAAGAGAAATTTCCAGAAGAATATTGAAGGATTAAGTTTGAGGTT  
GTAGAATATGTGAAAACACAC

>2629

CCACCTTCCCTGGCTCTTGAGGGTTCTTTGGGCATGTTCCCTCTGGTCTCCATTATTA

TATAGGGAAGAGAAATTTCCAGAAGAATATTTGAAGGATTAAAGTTTGAGGTTGTAGA  
ATATGTGAAAACACACACACA

>2630

GCTCTTGAGGGTTCTTTGGGCATGTTCCCCTCTGGTCTCCATTATTATATAGGGAAGAGA  
AATTTTCCAGAAGAATATTTGAAGGATTAAAGTTTGAGGTTGTAGAATATGTGAAAACA  
CACACACACCACACCACACC

>2631

TGTTCCCCTCTGGTCTCCATTATTATATAGGGAAGAGAAATTTCCAGAAGAATATTTGA  
AGGATTAAGTTTGAGGTTGTAGAATATGTGAAAACACACACACACCACACCACACC  
CAAAATCACCCCTTTAAAGAAG

>2632

TCTCCATTATTATATAGGGAAGAGAAATTTCCAGAAGAATATTTGAAGGATTAAGTTT  
GAGGTTGTAGAATATGTGAAAACACACACACACCACACCACACCCCAAAATCACCCCT  
TTAAAGAAGATTA AAAAACCAC

>2633

AAGTTTGAGGTTGTAGAATATGTGAAAACACACACACACCACACCACACCCCAAAATC  
ACCCTTTAAAGAAGATTA AAAAACCACAGTGCCTGTCTACATTGGTAAACTCTGG  
CAAGCCTCATAATGTTGACTTTAC

>2634

TTTGAGGTTGTAGAATATGTGAAAACACACACACACCACACCACACCCCAAAATCACC  
CTTTAAAGAAGATTA AAAAACCACAGTGCCTGTCTACATTGGTAAACTCTGGCAA  
GCCTCATAATGTTGACTTTACTGA

>2635

ATGTGAAAACACACACACACCACACCACACCCCAAAATCACCCCTTTAAAGAAGATTA  
AAAAACCACAGTGCCTGTCTACATTGGTAAACTCTGGCAAGCCTCATAATGTTGACT  
TTACTGACCTGCCTGACTTCAGT

>2636

CCAAAATCACCCCTTTAAAGAAGATTA AAAAACCACAGTGCCTGTCTACATTGGTA  
AACTCTGGCAAGCCTCATAATGTTGACTTTACTGACCTGCCTGACTTCAGTGGCCGAGT  
CTACATGGGGTGTTAAGGCCCA

>2637

GTGCCTGTCTACATTGGTAAACTCTGGCAAGCCTCATAATGTTGACTTTACTGACCTG  
CCTGACTTCAGTGGCCGAGTCTACATGGGGTGTTAAGGCCCCACGTGTTTTTGCCTGTG  
CCCTTAATTGTATCTTCAGGA

>2638

CCTACATTGGTAAACTCTGGCAAGCCTCATAATGTTGACTTTACTGACCTGCCTGACTT  
CAGTGGCCGAGTCTACATGGGGTGTTAAGGCCCCACGTGTTTTTGCCTGTGCCCTTAA  
TTGTATCTTCAGGACCATATTT

>2639

AGTGGCCGAGTCTACATGGGGTGTTAAGGCCCCACGTGTTTTTGCCTGTGCCCTTAA  
TGATCTTCAGGACCATATTTTCAAGCCAGAAATCACAGCCACAGTTTGCCAGTGGC  
ACAGAATGGTTCAATTTAGGCCT

>2640

CATGGGGTGTTAAGGCCCCACGTGTTTTTGCCTGTGCCCTTAAATTGTATCTTCAGGAC  
CATATTTTCAAGCCAGAAATCACAGCCACAGTTTGGCAGTGGCACAGAATGGTTCAA  
TTTAGGCCTATCCCAGAGAGGCT



>2641

GTGTTTTTGCTGTGCCCTTAATTGTATCTTCAGGACCATATTTTCAGAACCAGAAATC  
ACAGCCACAGTTTGGCAGTGGCACAGAATGGTTCAATTTAGGCCTATCCCAGAGAGGC  
TTGGGTTGTCTGTGAAGTTCTG

>2642

GCCTGTGCCCTTAATTGTATCTTCAGGACCATATTTTCAGAACCAGAAATCACAGCCA  
CAGTTTGGCAGTGGCACAGAATGGTTCAATTTAGGCCTATCCCAGAGAGGCTTGGGTT  
GTCTGTGAAGTTCTGGGTGGTCT

>2643

CCTTTAATTGTATCTTCAGGACCATATTTTCAGAACCAGAAATCACAGCCACAGTTTGG  
CAGTGGCACAGAATGGTTCAATTTAGGCCTATCCCAGAGAGGCTTGGGTTGTCTGTGA  
AGTTCTGGGTGGTCTGTATTGTG

>2644

TTTTCAGAACCAGAAATCACAGCCACAGTTTGGCAGTGGCACAGAATGGTTCAATTTA  
GGCCTATCCCAGAGAGGCTTGGGTTGTCTGTGAAGTTCTGGGTGGTCTGTATTGTGGA  
GAGGTGAACACCGTATTGCTGGGG

>2645

CACAGTTTGGCAGTGGCACAGAATGGTTCAATTTAGGCCTATCCCAGAGAGGCTTGGG  
TTGTCTGTGAAGTTCTGGGTGGTCTGTATTGTGGAGAGGTGAACACCGTATTGCTGGG  
GGTGTGGAGGGGGGATGTTGCTGT

>2646

GGTTCAATTTAGGCCTATCCCAGAGAGGCTTGGGTTGTCTGTGAAGTTCTGGGTGGTCT  
GTATTGTGGAGAGGTGAACACCGTATTGCTGGGGGTGTGGAGGGGGGATGTTGCTGTT  
TCCCTGCTACAGAAAGGCCAGGC

>2647

GGGTTGTCTGTGAAGTTCTGGGTGGTCTGTATTGTGGAGAGGTGAACACCGTATTGCT  
GGGGGTGTGGAGGGGGGATGTTGCTGTTTCCCTGCTACAGAAAGGCCAGGCTTCCTTT  
TCAGCCTTTTGTCCCGATTCCC

>2648

GTATTGTGGAGAGGTGAACACCGTATTGCTGGGGGTGTGGAGGGGGGATGTTGCTGTT  
TCCCTGCTACAGAAAGGCCAGGCTTCCTTTTTCAGCCTTTTGTCCCGATTCCCCTCTC  
TTCCTCCACTACACTCAGCCCTG

>2649

AGAGGTGAACACCGTATTGCTGGGGGTGTGGAGGGGGGATGTTGCTGTTTCCCTGCTA  
CAGAAAGGCCAGGCTTCCTTTTTCAGCCTTTTGTCCCGATTCCCCTCTCTTCCCTCCAC  
TACTACTCAGCCCTGCTGCTGCTT

>2650

TACAGAAAGGCCAGGCTTCCTTTTTCAGCCTTTTGTCCCGATTCCCCTCTCTTCCCTCC  
ACTACTACTCAGCCCTGCTGCTGCTTCCAAGGGACAACCTCCCTCTCTTGTCCCTTGCCCAT  
CTTTGAGAGAGGCGGTGAATAA

>2651

CTTTTCAGCCTTTTGTCCCGATTCCCCTCTCTTCCCTCCACTACTCAGCCCTGCTGC  
TGCTTCCAAGGGACAACCTCCCTCTCTTGTCCCTTGCCCATCTTTGAGAGAGGCGGTGAAT  
AAACACCAAGGCAAGAAGAAG

>2652

CTCCACTACTCAGCCCTGCTGCTGCTTCCAAGGGACAACCTCCCTCTCTTGTCCCTGCTG

CCATCTTTGAGAGAGGCGGTGAATAAACACCAAGGCAAGAAGAAGCAACGGGACCCC  
TAGAAGGAGATGAGTGTGTGGCCC

>2653

CCACTACACTCAGCCCTGCTGCTTCCAAGGGACAACCTCCTCTTGTCTTGCCC  
ATCTTTGAGAGAGGCGGTGAATAAACACCAAGGCAAGAAGAAGCAACGGGACCCCTA  
GAAGGAGATGAGTGTGTGGCCAA

>2654

TCCAAGGGACAACCTCCTCTTGTCTTGCCCATCTTTGAGAGAGGCGGTGAATAAA  
CACCAAGGCAAGAAGAAGCAACGGGACCCCTAGAAGGAGATGAGTGTGTGGCCAA  
GGATGGTGGAGCATTGTCCTGAAAGG

>2655

AAGGGACAACCTCCTCTTGTCTTGCCCATCTTTGAGAGAGGCGGTGAATAAACAC  
CAAGGCAAGAAGAAGCAACGGGACCCCTAGAAGGAGATGAGTGTGTGGCCCAAGGA  
TGGTGGAGCATTGTCCTGAAAGGTAG

>2656

GGACAACCTCCTCTTGTCTTGCCCATCTTTGAGAGAGGCGGTGAATAAACACCAA  
GGCAAGAAGAAGCAACGGGACCCCTAGAAGGAGATGAGTGTGTGGCCCAAGGATGGT  
GGAGCATTGTCCTGAAAGGTAGAAC

>2657

TTGTCCTTGCCCATCTTTGAGAGAGGCGGTGAATAAACACCAAGGCAAGAAGAAGCA  
ACGGGACCCCTAGAAGGAGATGAGTGTGTGGCCCAAGGATGGTGGAGCATTGTCCTG  
AAAGGTAGAACCAAGACTATAGCCTC

>2658

GGCGGTGAATAAACACCAAGGCAAGAAGAAGCAACGGGACCCCTAGAAGGAGATGA  
GTGTGTGGCCCAAGGATGGTGGAGCATTGTCCTGAAAGGTAGAACCAAGACTATAGCC  
TCCGAGGCTCTGTTTACCATATTCTT

>2659

GAAGAAGCAACGGGACCCCTAGAAGGAGATGAGTGTGTGGCCCAAGGATGGTGGAGC  
ATTGTCCTGAAAGGTAGAACCAAGACTATAGCCTCCGAGGCTCTGTTTACCATATTCTT  
GGCTCTTGTGCCACTTCTGTGTCC

>2660

AAGCAACGGGACCCCTAGAAGGAGATGAGTGTGTGGCCCAAGGATGGTGGAGCATTG  
TCCTGAAAGGTAGAACCAAGACTATAGCCTCCGAGGCTCTGTTTACCATATTCTTGGCT  
CTTGTGCCACTTCTGTGTCCAGCA

>2661

CTAGAAGGAGATGAGTGTGTGGCCCAAGGATGGTGGAGCATTGTCCTGAAAGGTAGA  
ACCAAGACTATAGCCTCCGAGGCTCTGTTTACCATATTCTTGGCTCTTGTGCCACTTCTG  
TGCCAGCAGCTGGAGCTTGTAG

>2662

AGAACCAAGACTATAGCCTCCGAGGCTCTGTTTACCATATTCTTGGCTCTTGTGCCACT  
TCTGTGTCCAGCAGCTGGAGCTTGTAGAAGAAAGATGGGAAAGACATAGTACAGGAA  
ATGTTCCCATTCAGCCAGCACTGA

>2663

ACCAAGACTATAGCCTCCGAGGCTCTGTTTACCATATTCTTGGCTCTTGTGCCACTTCTG  
TGCCAGCAGCTGGAGCTTGTAGAAGAAAGATGGGAAAGACATAGTACAGGAAATGT  
TCCCATTCAGCCAGCACTGATTT

>2664

TACCATATTCTTGGCTCTTGTGCCACTTCTGTGTCCAGCAGCTGGAGCTTGTAGAAGAA  
AGATGGGAAAGACATAGTACAGGAAATGTTCCATTTCAGCCAGCACTGATTTATCTGCT  
GCCTGGTTTCTCAGGAGGCCTA

>2665

ATTCTTGGCTCTTGTGCCACTTCTGTGTCCAGCAGCTGGAGCTTGTAGAAGAAAGATG  
GGAAAGACATAGTACAGGAAATGTTCCATTTCAGCCAGCACTGATTTATCTGCTGCCTG  
GTTTCTCAGGAGGCCTAATCTGT

>2666

TGGCTCTTGTGCCACTTCTGTGTCCAGCAGCTGGAGCTTGTAGAAGAAAGATGGGAAA  
GACATAGTACAGGAAATGTTCCATTTCAGCCAGCACTGATTTATCTGCTGCCTGGTTTC  
TCAGGAGGCCTAATCTGTAAGAA

>2667

CTGTGTCCAGCAGCTGGAGCTTGTAGAAGAAAGATGGGAAAGACATAGTACAGGAAA  
TGTTCCATTTCAGCCAGCACTGATTTATCTGCTGCCTGGTTTCTCAGGAGGCCTAATCT  
GTAAGAACAGTCGAGAAGTTTATT

>2668

TGGGAAAGACATAGTACAGGAAATGTTCCATTTCAGCCAGCACTGATTTATCTGCTGCC  
TGTTTCTCAGGAGGCCTAATCTGTAAGAACAGTCGAGAAGTTTATTCTGCCCTTTAA  
CCTATGTCCATTTTCTAGATAG

>2669

AGGAAATGTTCCATTTCAGCCAGCACTGATTTATCTGCTGCCTGGTTTCTCAGGAGGCC  
TAATCTGTAAGAACAGTCGAGAAGTTTATTCTGCCCTTTAACCTATGTCCATTTTCTAG  
ATAGTTTCTAAAAAAGGCATC

>2670

ATGTTCCATTTCAGCCAGCACTGATTTATCTGCTGCCTGGTTTCTCAGGAGGCCTAATCT  
GTAAGAACAGTCGAGAAGTTTATTCTGCCCTTTAACCTATGTCCATTTTCTAGATAGTT  
TCTAAAAAAGGCATCACACC

>2671

TCAGGAGGCCTAATCTGTAAGAACAGTCGAGAAGTTTATTCTGCCCTTTAACCTATGT  
CCATTTTCTAGATAGTTTCTAAAAAAGGCATCACACCAGCTCTTTGAGACAACATGTCA  
TATGCAACTGTTGGTTTTGGGT

>2672

GAGGCCTAATCTGTAAGAACAGTCGAGAAGTTTATTCTGCCCTTTAACCTATGTCCATT  
TTCTAGATAGTTTCTAAAAAAGGCATCACACCAGCTCTTTGAGACAACATGTCATATGC  
AACTGTTGGTTTTGGGTGGAA

>2673

GTAAGAACAGTCGAGAAGTTTATTCTGCCCTTTAACCTATGTCCATTTTCTAGATAGTT  
TCTAAAAAAGGCATCACACCAGCTCTTTGAGACAACATGTCATATGCAACTGTTGGTTT  
TGGGTGGAATGAACTGAATT

>2674

GAGAAGTTTATTCTGCCCTTTAACCTATGTCCATTTTCTAGATAGTTTCTAAAAAAGGC  
ATCACACCAGCTCTTTGAGACAACATGTCATATGCAACTGTTGGTTTTGGGTGGAATGA  
AACTGAATTGTCAACGGACAT

>2675

GGTTTTGGGTGGAATGAACTGAATTGTCAACGGACATTTTTTTCTTTCTGTATTCATGTG

TTTGAATAGTGACAACGTCATTGGTTCAGACTTTGAGCCCCCTTCTGGTTAGGCTCTT  
CAGTATAAGCCCTTAAAAATA

>2676

TGAATTGTCAACGGACATTTTTTCTTTCTGTATTCATGTGTTTGAATAGTGACAACGTC  
ATTGGTTCAGACTTTGAGCCCCCTTCTGGTTAGGCTCTTCAGTATAAGCCCTTAAAAATA  
TTTTTGACTTTTCAGGGCCA

>2677

CTTTCTGTATTCATGTGTTTGAATAGTGACAACGTCATTGGTTCAGACTTTGAGCCCC  
CTTCTGGTTAGGCTCTTCAGTATAAGCCCTTAAAAATATTTTTGACTTTTCAGGGCCAGG  
CGCGGTGGCTCACGCCTGTAA

>2678

TTCATGTGTTTGAATAGTGACAACGTCATTGGTTCAGACTTTGAGCCCCCTTCTGGTT  
AGGCTCTTCAGTATAAGCCCTTAAAAATATTTTTGACTTTTCAGGGCCAGGCGCGGTGG  
CTCACGCCTGTAATCCCAGCAC

>2679

TGTTTGAATAGTGACAACGTCATTGGTTCAGACTTTGAGCCCCCTTCTGGTTAGGCTC  
TTCAGTATAAGCCCTTAAAAATATTTTTGACTTTTCAGGGCCAGGCGCGGTGGCTCACG  
CCTGTAATCCCAGCACTTTGGG

>2680

TTCAGACTTTGAGCCCCCTTCTGGTTAGGCTCTTCAGTATAAGCCCTTAAAAATATTTTT  
GACTTTTCAGGGCCAGGCGCGGTGGCTCACGCCTGTAATCCCAGCACTTTGGGAGGCC  
GAGGCAGGTGGATCACGAGGTC

>2681

CAGTATAAGCCCTTAAAAATATTTTTGACTTTTCAGGGCCAGGCGCGGTGGCTCACGCC  
TGTAATCCCAGCACTTTGGGAGGCCGAGGCAGGTGGATCACGAGGTCAGGAGATCGA  
GACCATCCTGGCTAACACGGTGAA

>2682

CTTAAAAATATTTTTGACTTTTCAGGGCCAGGCGCGGTGGCTCACGCCTGTAATCCCAG  
CACTTTGGGAGGCCGAGGCAGGTGGATCACGAGGTCAGGAGATCGAGACCATCCTGG  
CTAACACGGTGAAAGCCCGTCTCT

>2683

CAGGGCCAGGCGCGGTGGCTCACGCCTGTAATCCCAGCACTTTGGGAGGCCGAGGCA  
GGTGGATCACGAGGTCAGGAGATCGAGACCATCCTGGCTAACACGGTGAAAGCCCGT  
CTCTACTAAAAATACAAAAAATTAGC

>2684

CTTTGGGAGGCCGAGGCAGGTGGATCACGAGGTCAGGAGATCGAGACCATCCTGGCT  
AACACGGTGAAAGCCCGTCTCTACTAAAAATACAAAAAATTAGCCAGGTGTGGTGGCG  
GGCGCCTGTAGTCCCAGCTACTCGA

>2685

GGTCAGGAGATCGAGACCATCCTGGCTAACACGGTGAAAGCCCGTCTCTACTAAAAAT  
ACAAAAAATTAGCCAGGTGTGGTGGCGGGCGCCTGTAGTCCCAGCTACTCGAGAGGCT  
GAGGCTGGAGAATGGCGTGAACCC

>2686

TAAACGGTGAAAGCCCGTCTCTACTAAAAATACAAAAAATTAGCCAGGTGTGGTGGC  
GGGCGCCTGTAGTCCCAGCTACTCGAGAGGCTGAGGCTGGAGAATGGCGTGAACCCG  
GAGGCAGAGTTTGCAGTGAGCTGAG



GTCCGTGTAAAGTCTAAGATGTTGGTTCATCTCAACATTGGGATATTGGAATAGGCCAC  
TTTGAAGGTTTCTCTAATTGAT

>2699

AACAAAAACCAAACGAGTCCGTGTAAAGTCTAAGATGTTGGTTCATCTCAACATTGGG  
ATATTGGAATAGGCCACTTTGGAAGGTTTCTCTAATTGATGAAGGGCATGGGCCACCCC  
ATGGATTGCAATGCTGTGGCTGT

>2700

CGAGTCCGTGTAAAGTCTAAGATGTTGGTTCATCTCAACATTGGGATATTGGAATAGGC  
CACTTTGGAAGGTTTCTCTAATTGATGAAGGGCATGGGCCACCCCATGGATTGCAATGC  
TGTGGCTGTTTGGGTGGCATCC

>2701

AGATGTTGGTTCATCTCAACATTGGGATATTGGAATAGGCCACTTTGGAAGGTTTCTCT  
AATTGATGAAGGGCATGGGCCACCCCATGGATTGCAATGCTGTGGCTGTTTGGGTGGC  
ATCCAGCTTCTAGGGGATGGTGG

>2702

TTCTCTAATTGATGAAGGGCATGGGCCACCCCATGGATTGCAATGCTGTGGCTGTTTGG  
GTGGCATCCAGCTTCTAGGGGATGGTGGCAAACCTTGGGTGTGCAGGCAGTAGGAAGG  
AGGAGGTAGCTTCCAGAGAGAGCC

>2703

ATTGATGAAGGGCATGGGCCACCCCATGGATTGCAATGCTGTGGCTGTTTGGGTGGCAT  
CCAGCTTCTAGGGGATGGTGGCAAACCTTGGGTGTGCAGGCAGTAGGAAGGAGGAGGT  
AGCTTCCAGAGAGAGCCATTGCTG

>2704

GGATTGCAATGCTGTGGCTGTTTGGGTGGCATCCAGCTTCTAGGGGATGGTGGCAAAC  
TTGGGTGTGCAGGCAGTAGGAAGGAGGAGGTAGCTTCCAGAGAGAGCCATTGCTGGG  
GCTCAAGAAGTTTCTTTCTGGGCTC

>2705

TGCAATGCTGTGGCTGTTTGGGTGGCATCCAGCTTCTAGGGGATGGTGGCAAACCTTGG  
GTGTGCAGGCAGTAGGAAGGAGGAGGTAGCTTCCAGAGAGAGCCATTGCTGGGGCTC  
AAGAAGTTTCTTTCTGGGCTCAAGC

>2706

TTGGGTGGCATCCAGCTTCTAGGGGATGGTGGCAAACCTTGGGTGTGCAGGCAGTAGGA  
AGGAGGAGGTAGCTTCCAGAGAGAGCCATTGCTGGGGCTCAAGAAGTTTCTTTCTGG  
GCTCAAGCATGGTTGCTAGTGGTCC

>2707

GCAAACCTTGGGTGTGCAGGCAGTAGGAAGGAGGAGGTAGCTTCCAGAGAGAGCCATT  
GCTGGGGCTCAAGAAGTTTCTTTCTGGGCTCAAGCATGGTTGCTAGTGGTCCACACAG  
TGCTTTCGTGTGAATTAGAAAAAGC

>2708

AACTTGGGTGTGCAGGCAGTAGGAAGGAGGAGGTAGCTTCCAGAGAGAGCCATTGCT  
GGGGCTCAAGAAGTTTCTTTCTGGGCTCAAGCATGGTTGCTAGTGGTCCACACAGTGC  
TTTCGTGTGAATTAGAAAAAGCACC

>2709

GTAGGAAGGAGGAGGTAGCTTCCAGAGAGAGCCATTGCTGGGGCTCAAGAAGTTTCT  
TTCTGGGCTCAAGCATGGTTGCTAGTGGTCCACACAGTGCTTTCGTGTGAATTAGAAA  
AAGCACCTTGTTGTGGATGGATGT

>2710

GAGAGAGCCATTGCTGGGGCTCAAGAAGTTTCTTTCTGGGCTCAAGCATGGTTGCTAG  
TGGTCCACACAGTGCTTTCTGTGAATTAGAAAAAGCACCCCTTGTTGTGGATGGATG  
GGCTCTTAAGGGTCTATCCCA

>2711

GCTCAAGAAGTTTCTTTCTGGGCTCAAGCATGGTTGCTAGTGGTCCACACAGTGCTTTC  
GTGTGAATTAGAAAAAGCACCCCTTGTTGTGGATGGATGTGGCTCTTAAGGGTCTAT  
CCCACAGTGAGCTGGTTGGGGC

>2712

GAAGTTTCTTTCTGGGCTCAAGCATGGTTGCTAGTGGTCCACACAGTGCTTTCGTGTGA  
ATTAGAAAAAGCACCCCTTGTTGTGGATGGATGTGGCTCTTAAGGGTCTATCCACA  
GTGAGCTGGTTGGGGCTGGATC

>2713

GGTCCACACAGTGCTTTCGTGTGAATTAGAAAAAGCACCCCTTGTTGTGGATGGATGTG  
GCTCTTAAGGGTCTATCCACAGTGAGCTGGTTGGGGCTGGATCTCAAACCTCTTT  
GCCCCTCAATCAGAGGCAGGAGG

>2714

TTTCGTGTGAATTAGAAAAAGCACCCCTTGTTGTGGATGGATGTGGCTCTTAAGGGT  
CTATCCACAGTGAGCTGGTTGGGGCTGGATCTCAAACCTCTTTGCCCTCAATCAGAG  
GCAGGAGGTCCCTGGCCCAAGG

>2715

GTGTGAATTAGAAAAAGCACCCCTTGTTGTGGATGGATGTGGCTCTTAAGGGTCTAT  
CCCACAGTGAGCTGGTTGGGGCTGGATCTCAAACCTCTTTGCCCTCAATCAGAGGCA  
GGAGGTCCCTGGCCCAAGGGGCT

>2716

TCTTAAGGGTCTATCCACAGTGAGCTGGTTGGGGCTGGATCTCAAACCTCTTTGC  
CCCTCAATCAGAGGCAGGAGGTCCCTGGCCCAAGGGGCTTCATGGTTGGAGTGGTC  
GTCAGCCGAAAGCTGTTCTGGTGA

>2717

GTGAGCTGGTTGGGGCTGGATCTCAAACCTCTTTGCCCTCAATCAGAGGCAGGAGGT  
CCCTGGCCCAAGGGGCTCCATGGTTGGAGTGGTCGTCAGCCGAAAGCTGTTCTGGTG  
AGATGTTTTGAGCTATCAGTTCCA

>2718

GATCTCAAACCTCTTTGCCCTCAATCAGAGGCAGGAGGTCCCTGGCCCAAGGGGCTT  
CCATGGTTGGAGTGGTCGTCAGCCGAAAGCTGTTCTGGTGAGATGTTTTGAGCTATCA  
GTTCCAAGTTTCAAAGGCCAAGG

>2719

CCCCTCAATCAGAGGCAGGAGGTCCCTGGCCCAAGGGGCTTCATGGTTGGAGTGGTC  
GTCAGCCGAAAGCTGTTCTGGTGAGATGTTTTGAGCTATCAGTTCCAAGTTTCAAAG  
GCCAAGGCCTCTGGGATCAGTTTC

>2720

GGCAGGAGGTCCCTGGCCCAAGGGGCTTCATGGTTGGAGTGGTCGTCAGCCGAAAG  
CTGTTCTGGTGAGATGTTTTGAGCTATCAGTTCCAAGTTTCAAAGGCCAAGGCCTCTG  
GGATCAGTTTCACTGATCCTTCAA

>2721

CCCTGGCCCAAGGGGCTTCATGGTTGGAGTGGTCGTCAGCCGAAAGCTGTTCTGGTG

AGATGTTTTGAGCTATCAGTTCCAAGTTTCAAAGGCCAAGGCCTCTGGGATCAGTTTC  
ACTGATCCTTCAACCAGCTTATG

>2722

CCAAGGGGCTTCCATGGTTGGAGTGGTCGTCAGCCGAAAGCTGTTCTGGTGAGATGTT  
TTGAGCTATCAGTTCCAAGTTTCAAAGGCCAAGGCCTCTGGGATCAGTTTCACTGATC  
CTTCAACCAGCTTATGTGCCCTG

>2723

GTTGGAGTGGTCGTCAGCCGAAAGCTGTTCTGGTGAGATGTTTTGAGCTATCAGTTCC  
AAGTTTCAAAGGCCAAGGCCTCTGGGATCAGTTTCACTGATCCTTCAACCAGCTTATG  
TGCCCTGTTAGCCCAGATACCCC

>2724

TTTGAGCTATCAGTTCCAAGTTTCAAAGGCCAAGGCCTCTGGGATCAGTTTCACTGAT  
CCTTCAACCAGCTTATGTGCCCTGTTAGCCCAGATACCCCTCCAGAGTGCTTCGCACTG  
GGCTGCAGGTCACTGTGGCCCC

>2725

AAGTTTCAAAGGCCAAGGCCTCTGGGATCAGTTTCACTGATCCTTCAACCAGCTTATG  
TGCCCTGTTAGCCCAGATACCCCTCCAGAGTGCTTCGCACTGGGCTGCAGGTCACTGT  
GGCCCCACACCATAGAAGCTGGG

>2726

GGCCTCTGGGATCAGTTTCACTGATCCTTCAACCAGCTTATGTGCCCTGTTAGCCCAGA  
TACCCCTCCAGAGTGCTTCGCACTGGGCTGCAGGTCACTGTGGCCCCACACCATAGAA  
GCTGGGGGCCTGTCTGCATGTTT

>2727

GATCCTTCAACCAGCTTATGTGCCCTGTTAGCCCAGATACCCCTCCAGAGTGCTTCGCA  
CTGGGCTGCAGGTCACTGTGGCCCCACACCATAGAAGCTGGGGGCCTGTCTGCATGTT  
CTGGCATCCATAAAGCTGCCTGC

>2728

CCTGTTAGCCCAGATACCCCTCCAGAGTGCTTCGCACTGGGCTGCAGGTCACTGTGGC  
CCCACACCATAGAAGCTGGGGCCTGTCTGCATGTTCTGGCATCCATAAAGCTGCCTGC  
AAACGTGAGAGGGGGTTTATGGC

>2729

GGCTGCAGGTCACTGTGGCCCCACACCATAGAAGCTGGGGCCTGTCTGCATGTTCTG  
GCATCCATAAAGCTGCCTGCAAACGTGAGAGGGGGTTTATGGCACCCCTTTTAGCATGA  
CTGTCTCTTGACCAAGGCCAAG

>2730

GCCCCACACCATAGAAGCTGGGGCCTGTCTGCATGTTCTGGCATCCATAAAGCTGCCT  
GCAAACGTGAGAGGGGGTTTATGGCACCCCTTTTAGCATGACTGTCTCTTGACCAAG  
GCCAAGAAAATAGCACAAGAT

>2731

CCTGTCTGCATGTTCTGGCATCCATAAAGCTGCCTGCAAACGTGAGAGGGGGTTTATGG  
CACCCCTTTAGCATGACTGTCTCTTGACCAAGGCCAAGAAAATAGCACAAGATG  
TAGGAGTGGTGAGGAATGAAGAT

>2732

ATAAAGCTGCCTGCAAACGTGAGAGGGGGTTTATGGCACCCCTTTTAGCATGACTGTCTC  
TTGTGACCAAGGCCAAGAAAATAGCACAAGATGTAGGAGTGGTGAGGAATGAAGA  
TGCACGTGCACGCGCCCTGCAGTC



>2733

CTGCCTGCAAACGTGAGAGGGGGTTTATGGCACCCCTTTTAGCATGACTGTCTCTTGTGA  
CCAAGGCCAAGAAAAATAGCACAAAGATGTAGGAGTGGTGAGGAATGAAGATGCACG  
TGCACGCGCCCTGCAGTCTCAGTC

>2734

GGTTTATGGCACCCCTTTTAGCATGACTGTCTCTTGTGACCAAGGCCAAGAAAAATAGCA  
CAAAGATGTAGGAGTGGTGAGGAATGAAGATGCACGTGCACGCGCCCTGCAGTCTCA  
GTCAATGCGCTCTTTAGGGTTAG

>2735

AGCATGACTGTCTCTTGTGACCAAGGCCAAGAAAAATAGCACAAAGATGTAGGAGTG  
GTGAGGAATGAAGATGCACGTGCACGCGCCCTGCAGTCTCAGTCAATGCGCTCTTTAG  
GGTTAGTTTGAAAACACAGTGT

>2736

AGGCCAAGAAAAATAGCACAAAGATGTAGGAGTGGTGAGGAATGAAGATGCACGTGC  
ACGCGCCCTGCAGTCTCAGTCAATGCGCTCTTTAGGGTTAGTTTGAAAACACAGT  
GTCGTGTCTTATGTAACCAATTTCT

>2737

AGAAAAATAGCACAAAGATGTAGGAGTGGTGAGGAATGAAGATGCACGTGCACGCGC  
CCTGCAGTCTCAGTCAATGCGCTCTTTAGGGTTAGTTTGAAAACACAGTGTGCGTGT  
CTTATGTAACCAATTTCTTTTCTT

>2738

AAGATGCACGTGCACGCGCCCTGCAGTCTCAGTCAATGCGCTCTTTAGGGTTAGTTTG  
GAAAACACAGTGTGCGTGTCTTATGTAACCAATTTCTTTCTTTTCTTTTCTTTTCTTTT  
TTTTTTTTTTTTTTGTGATG

>2739

CGTGTCTTATGTAACCAATTTCTTTTCTTTTCTTTTCTTTTCTTTTTTTTTTTTTTTTGG  
TGATGGAGTCTCGTGTCTTGCTCTGTCAACCCAGGCTGGAGTGCAGTGGCTCGATCTCG  
GCTCACTGCAACCTCCGCCT

>2740

TCTTTTCTTTCTTTTCTTTTCTTTTCTTTTCTTTTCTTTTCTTTTTTTTTTTTTTTTGG  
TCAACCCAGGCTGGAGTGCAGTGGCTCGATCTCGGCTCACTGCAACCTCCGCCTCCAG  
GTTCAAGCGACTATCCTGCC

>2741

TGTCTTGCTCTGTCAACCCAGGCTGGAGTGCAGTGGCTCGATCTCGGCTCACTGCAACC  
TCCGCCTCCAGGTTCAAGCGACTATCCTGCCTCAGCCTCCTGAGTAGCTGGGACTAC  
AGGCGCCCCGCCACCACGCCAGCT

>2742

CTCTGTCACCCAGGCTGGAGTGCAGTGGCTCGATCTCGGCTCACTGCAACCTCCGCCT  
CCCAGGTTCAAGCGACTATCCTGCCTCAGCCTCCTGAGTAGCTGGGACTACAGGCGCC  
CGCCACCACGCCAGCTAATTTTT

>2743

GAGTGCAGTGGCTCGATCTCGGCTCACTGCAACCTCCGCCTCCAGGTTCAAGCGACT  
ATCCTGCCTCAGCCTCCTGAGTAGCTGGGACTACAGGCGCCCCGCCACCACGCCAGCT  
AATTTTTTGTGTATTTAGTAGAGA

>2744

GGCTCGATCTCGGCTCACTGCAACCTCCGCCTCCAGGTTCAAGCGACTATCCTGCCTC

AGCCTCCTGAGTAGCTGGGACTACAGGCGCCCGCCACCACGCCAGCTAATTTTTTGT  
GTATTTAGTAGAGACGGGGTTTC

>2745

TCGATCTCGGCTCACTGCAACCTCCGCCTCCAGGTTCAAGCGACTATCCTGCCTCAGC  
CTCCTGAGTAGCTGGGACTACAGGCGCCCGCCACCACGCCAGCTAATTTTTTGTGTAT  
TTAGTAGAGACGGGGTTTCACC

>2746

CACTGCAACCTCCGCCTCCAGGTTCAAGCGACTATCCTGCCTCAGCCTCCTGAGTAG  
CTGGGACTACAGGCGCCCGCCACCACGCCAGCTAATTTTTTGTGTATTTAGTAGAGAC  
GGGGTTTCACCGTGTAGCCAGG

>2747

CCTCAGCCTCCTGAGTAGCTGGGACTACAGGCGCCCGCCACCACGCCAGCTAATTTT  
TTGTGTATTTAGTAGAGACGGGGTTTCACCGTGTAGCCAGGATGGTCACAATCTCCTG  
ACCTCGTGGTCCGCCCGCCTTGG

>2748

CAGCCTCCTGAGTAGCTGGGACTACAGGCGCCCGCCACCACGCCAGCTAATTTTTTG  
TGATTTAGTAGAGACGGGGTTTCACCGTGTAGCCAGGATGGTCACAATCTCCTGACC  
TCGTGGTCCGCCCGCCTTGGCCT

>2749

TACAGGCGCCCGCCACCACGCCAGCTAATTTTTTGTGTATTTAGTAGAGACGGGGTTT  
CACCGTGTAGCCAGGATGGTCACAATCTCCTGACCTCGTGGTCCGCCCGCCTTGGCCT  
CCCACAGTGCTGGGATTACAGG

>2750

GTTTCACCGTGTAGCCAGGATGGTCACAATCTCCTGACCTCGTGGTCCGCCCGCCTTG  
GCCTCCACAGTGCTGGGATTACAGGCGTGAGCCACCACGCCCGGCCACCAATTTCTT  
ATACATAGGTTATGGAGCAGGGA

>2751

GCCAGGATGGTCACAATCTCCTGACCTCGTGGTCCGCCCGCCTTGGCCTCCACAGTG  
CTGGGATTACAGGCGTGAGCCACCACGCCCGGCCACCAATTTCTTATACATAGGTTATG  
GAGCAGGGAGAAAGAGACATGCA

>2752

CTTGGCCTCCACAGTGCTGGGATTACAGGCGTGAGCCACCACGCCCGGCCACCAATT  
TCTTATACATAGGTTATGGAGCAGGGAGAAAGAGACATGCAAACAAGGCAGAATTGGG  
ACCTTTGCAAGAAGACCTTCTTCA

>2753

CCACAGTGCTGGGATTACAGGCGTGAGCCACCACGCCCGGCCACCAATTTCTTATACAT  
AGGTTATGGAGCAGGGAGAAAGAGACATGCAAACAAGGCAGAATTGGGACCTTTGCA  
AGAAGACCTTCTTCACTCGCCAC

>2754

GCCACCACGCCCGGCCACCAATTTCTTATACATAGGTTATGGAGCAGGGAGAAAGAGA  
CATGCAAACAAGGCAGAATTGGGACCTTTGCAAGAAGACCTTCTTCACTCGCCCACTT  
TCTCATACTTTTAGTCACCAAGGC

>2755

TTCTTATACATAGGTTATGGAGCAGGGAGAAAGAGACATGCAAACAAGGCAGAATTGG  
GACCTTTGCAAGAAGACCTTCTTCACTCGCCCACTTTCTCATACTTTTAGTCACCAAGG  
CAGGGTCTTTTTAAACAACCTTCG

>2756

TTATACATAGGTTATGGAGCAGGGAGAAAGAGACATGCAAACAAGGCAGAATTGGGAC  
CTTTGCAAGAAGACCTTCTTCACTCGCCCACTTTCTCATACTTTTAGTCACCAAGGCAG  
GGTCTTTTTAAACAACCTCGAGG

>2757

TGCAAACAAGGCAGAATTGGGACCTTTGCAAGAAGACCTTCTTCACTCGCCCACTTTC  
TCATACTTTTAGTCACCAAGGCAGGGTCTTTTTAAACAACCTCGAGGCTCAGGCCTAGG  
GGGTTAGGAGAGTAAACCCTAAA

>2758

AGGCAGAATTGGGACCTTTGCAAGAAGACCTTCTTCACTCGCCCACTTTCTCATACTTT  
TAGTCACCAAGGCAGGGTCTTTTTAAACAACCTCGAGGCTCAGGCCTAGGGGGTTAGG  
AGAGTAAACCCTAAATCCCTTTC

>2759

AGAATTGGGACCTTTGCAAGAAGACCTTCTTCACTCGCCCACTTTCTCATACTTTTAGT  
CACCAAGGCAGGGTCTTTTTAAACAACCTCGAGGCTCAGGCCTAGGGGGTTAGGAGA  
GTAAACCCTAAATCCCTTTCACCC

>2760

GACCTTCTTCACTCGCCCACTTTCTCATACTTTTAGTCACCAAGGCAGGGTCTTTTTAA  
ACAACCTCGAGGCTCAGGCCTAGGGGGTTAGGAGAGTAAACCCTAAATCCCTTTCACC  
CTAGCATGCTTGGGTGCCGTGT

>2761

TCGCCCACTTTCTCATACTTTTAGTCACCAAGGCAGGGTCTTTTTAAACAACCTCGAGG  
CTCAGGCCTAGGGGGTTAGGAGAGTAAACCCTAAATCCCTTTCACCCTAGCATGCTTGG  
GTGCCGTGTTGACAAGGTCTCT

>2762

CTTTTTAAACAACCTCGAGGCTCAGGCCTAGGGGGTTAGGAGAGTAAACCCTAAATCC  
CTTTCACCCTAGCATGCTTGGGTGCCGTGTTGACAAGGTCTCTGAAGTGCCCATGGGA  
AGCAGACCAGGCTCTGAGAATAAT

>2763

GCCTAGGGGGTTAGGAGAGTAAACCCTAAATCCCTTTCACCCTAGCATGCTTGGGTGCC  
GTGTTGACAAGGTCTCTGAAGTGCCCATGGGAAGCAGACCAGGCTCTGAGAATAATTT  
CCATGGAATTAATTATTGTTCTT

>2764

CCCTAAATCCCTTTCACCCTAGCATGCTTGGGTGCCGTGTTGACAAGGTCTCTGAAGTG  
CCCATGGGAAGCAGACCAGGCTCTGAGAATAATTTCCATGGAATTAATTATTGTTCTTA  
CTCCAATAGATTTGAAATCTAT

>2765

TAAATCCCTTTCACCCTAGCATGCTTGGGTGCCGTGTTGACAAGGTCTCTGAAGTGCCC  
ATGGGAAGCAGACCAGGCTCTGAGAATAATTTCCATGGAATTAATTATTGTTCTTACTCC  
AATAGATTTGAAATCTATTTA

>2766

CCCTAGCATGCTTGGGTGCCGTGTTGACAAGGTCTCTGAAGTGCCCATGGGAAGCAGA  
CCAGGCTCTGAGAATAATTTCCATGGAATTAATTATTGTTCTTACTCCAATAGATTTGAA  
ATCTATTTAACTTTTCAGGGTC

>2767

TGCCCATGGGAAGCAGACCAGGCTCTGAGAATAATTTCCATGGAATTAATTATTGTTCTT

ACTCCAATAGATTTGAAATCTATTTAACTTTTCAGGGTCCCCTAGCTTTTTAAATGTTTC  
AAGTGATTCTCTCTGATAG

>2768

TGAGAATAATTTCCATGGAATTAATTATTGTTCTTACTCCAATAGATTTGAAATCTATTTA  
ACTTTTCAGGGTCCCCTAGCTTTTTAAATGTTTCAAGTGATTCTCTCTGATAGGTTGCC  
TTTTCTCTCCCTGTAGGCT

>2769

TTCATGGAATTAATTATTGTTCTTACTCCAATAGATTTGAAATCTATTTAACTTTTCAGG  
GTCCCCTAGCTTTTTAAATGTTTCAAGTGATTCTCTCTGATAGGTTGCCTTTTCTCTCCC  
TGTAGGCTATAATTAGTG

>2770

ATTTGAAATCTATTTAACTTTTCAGGGTCCCCTAGCTTTTTAAATGTTTCAAGTGATTCT  
CTCTGATAGGTTGCCTTTTCTCTCCCTGTAGGCTATAATTAGTGCCTTTACACAAAATT  
GGCTTAGAATTGGATTTAG

>2771

CAGGGTCCCCTAGCTTTTTAAATGTTTCAAGTGATTCTCTCTGATAGGTTGCCTTTTCT  
CTCCCTGTAGGCTATAATTAGTGCCTTTACACAAAATTGGCTTAGAATTGGATTTAGAG  
AAGATAAGAATCAAATTACC

>2772

TCTCTGATAGGTTGCCTTTTCTCTCCCTGTAGGCTATAATTAGTGCCTTTACACAAA  
ATTGGCTTAGAATTGGATTTAGAGAAGATAAGAATCAAATTACCAGTATTTATCTTGTA  
ATTCCAAAAGATCTACTTAA

>2773

GTTGCCTTTTCTCTCCCTGTAGGCTATAATTAGTGCCTTTACACAAAATTGGCTTAGAA  
TTGGATTTAGAGAAGATAAGAATCAAATTACCAGTATTTATCTTGAAATTCCAAAAGAT  
CTACTTAAGACACTGTATTA

>2774

TATAATTAGTGCCTTTACACAAAATTGGCTTAGAATTGGATTTAGAGAAGATAAGAATC  
AAATTACCAGTATTTATCTTGAAATTCCAAAAGATCTACTTAAGACACTGTATTA  
AGGAGTATAAAAGAAAAGTT

>2775

ATTGGCTTAGAATTGGATTTAGAGAAGATAAGAATCAAATTACCAGTATTTATCTTGTA  
ATTCCAAAAGATCTACTTAAGACACTGTATTA  
AGGAGTATAAAAGAAAAGTTTAT  
TCTATGAAAAGTAAATTCCT

>2776

ATTGGATTTAGAGAAGATAAGAATCAAATTACCAGTATTTATCTTGAAATTCCAAAAGA  
TCTACTTAAGACACTGTATTA  
AGGAGTATAAAAGAAAAGTTTAT  
TCTATGAAAAA

>2777

TAAGAATCAAATTACCAGTATTTATCTTGAAATTCCAAAAGATCTACTTAAGACACTGT  
ATTA  
AGGAGTATAAAAGAAAAGTTTAT  
TCTATGAAAAA  
AGTAAATTCCTCATGGTCTGAG

>2778

TTCCAAAAGATCTACTTAAGACACTGTATTA  
AGGAGTATAAAAGAAAAGTTTAT  
CTATGAAAAA  
AGTAAATTCCTCATGGTCTGAGCAACCAGGGGATTTTAAATATCAAATCTC  
CAGACTTCCCTTGAGGCACC

>2779

ACACTGTATTAAGGAGTATAAGAAAAGTTTATTCTATGAAAAGTAAATTCCT  
CATGGTCTGAGCAACCAGGGGTATTTAATATCAAATCTCCAGACTTCCCTTGGAGGCA  
CCTAAAATTGCCTTTCCCTTG

>2780

GTTTATTCTATGAAAAGTAAATTCCTCATGGTCTGAGCAACCAGGGGTATTTAATATC  
AAATCTCCAGACTTCCCTTGGAGGCACCTAAAATTGCCTTTCCCTTGTGCGCTCGTTTT  
ATCTCCAGTTGAGCTTCTGA

>2781

AAAAGTAAATTCCTCATGGTCTGAGCAACCAGGGGTATTTAATATCAAATCTCCAGAC  
TTCCCTTGGAGGCACCTAAAATTGCCTTTCCCTTGTGCGCTCGTTTTATCTCCAGTTGA  
GCTTCTGAAATATGTTGCCAG

>2782

TCAAATCTCCAGACTTCCCTTGGAGGCACCTAAAATTGCCTTTCCCTTGTGCGCTCGTT  
TTTATCTCCAGTTGAGCTTCTGAAATATGTTGCCAGGCTTTGGATATTGGAGAGCTGGT  
GTGGTTTCAGCTTTCATTAATA

>2783

TCTCCAGACTTCCCTTGGAGGCACCTAAAATTGCCTTTCCCTTGTGCGCTCGTTTTATC  
TCCAGTTGAGCTTCTGAAATATGTTGCCAGGCTTTGGATATTGGAGAGCTGGTGTGGTT  
TCAGCTTTCATTAATAATTCGG

>2784

GCACCTAAAATTGCCTTTCCCTTGTGCGCTCGTTTTATCTCCAGTTGAGCTTCTGAAAT  
ATGTTGCCAGGCTTTGGATATTGGAGAGCTGGTGTGGTTTCAGCTTTCATTAATAATTCG  
GAGGTTTACTTATCTATTA

>2785

TTCCCTTGTGCGCTCGTTTTATCTCCAGTTGAGCTTCTGAAATATGTTGCCAGGCTTTG  
GATATTGGAGAGCTGGTGTGGTTTCAGCTTTCATTAATAATTCGGAGGTTTACTTATCT  
ATTATTTCTGATTTGTGGTA

>2786

TTTTATCTCCAGTTGAGCTTCTGAAATATGTTGCCAGGCTTTGGATATTGGAGAGCTGGT  
GTGGTTTCAGCTTTCATTAATAATTCGGAGGTTTACTTATCTATTTCTGATTTGTGG  
TAAGACATAAGCCTCTAAA

>2787

TCTGAAATATGTTGCCAGGCTTTGGATATTGGAGAGCTGGTGTGGTTTCAGCTTTCATTA  
AAATTCGGAGGTTTACTTATCTATTTCTGATTTGTGGTAAGACATAAGCCTCTAA  
AATATGCTATCTTAAAGAGA

>2788

CTGGTGTGGTTTCAGCTTTCATTAATAATTCGGAGGTTTACTTATCTATTTCTGATT  
TGTGGTAAGACATAAGCCTCTAAAATATGCTATCTTAAAGAGATACACAAAATTTATC  
TTAGCATGTTAAGTTTTTA

>2789

GGTTTCAGCTTTCATTAATAATTCGGAGGTTTACTTATCTATTTCTGATTTGTGGTA  
AGACATAAGCCTCTAAAATATGCTATCTTAAAGAGATACACAAAATTTATCTTAGCAT  
GTTAAGTTTTAAGCCGTT

>2790

GAGGTTTACTTATCTATTTCTGATTTGTGGTAAGACATAAGCCTCTAAAATATGCT

ATCTTAAAGAGATACACACAAATTTTATCTTAGCATGTAAAGTTTTTAAGCCGTTGAGAG  
ATGGCAGAATAGACCTCTG

>2791

CTGATTTGTGGTAAGACATAAGCCTCTAAAATATGCTATCTTAAAGAGATACACACAAAT  
TTTATCTTAGCATGTAAAGTTTTTAAGCCGTTGAGAGATGGCAGAATAGACCTCTGTGG  
TCTCCTGTGTGCTTCTTCGTC

>2792

GGTAAGACATAAGCCTCTAAAATATGCTATCTTAAAGAGATACACACAAATTTTATCTTA  
GCATGTTAAGTTTTTAAGCCGTTGAGAGATGGCAGAATAGACCTCTGTGGTCTCCTGTG  
TGCTTCTTCGTCCTAAAATGT

>2793

ATAAGCCTCTAAAATATGCTATCTTAAAGAGATACACACAAATTTTATCTTAGCATGTAA  
AGTTTTTAAGCCGTTGAGAGATGGCAGAATAGACCTCTGTGGTCTCCTGTGTGCTTCTT  
CGTCCTAAAATGTCAGCATGC

>2794

CTAAAATATGCTATCTTAAAGAGATACACACAAATTTTATCTTAGCATGTTAAGTTTTTA  
AGCCGTTGAGAGATGGCAGAATAGACCTCTGTGGTCTCCTGTGTGCTTCTTCGTCCTAA  
AATGTCAGCATGCTGGTTTTTC

>2795

CTTAAAGAGATACACACAAATTTTATCTTAGCATGTAAAGTTTTTAAGCCGTTGAGAGAT  
GGCAGAATAGACCTCTGTGGTCTCCTGTGTGCTTCTTCGTCCTAAAATGTCAGCATGCT  
GGTTTTCATGTGCTGCCTCGT

>2796

TTAAGCCGTTGAGAGATGGCAGAATAGACCTCTGTGGTCTCCTGTGTGCTTCTTCGTCC  
TAAAATGTCAGCATGCTGGTTTTCATGTGCTGCCTCGTACAGTAAGTCCCCAGCAGATT  
TAAATAAGGTTGTGTCAAACA

>2797

CTGTGGTCTCCTGTGTGCTTCTTCGTCCTAAAATGTCAGCATGCTGGTTTTCATGTGCTG  
CCTCGTACAGTAAGTCCCCAGCAGATTTAAATAAGGTTGTGTCAAACATATGCCTATG  
TTTTTTTTAACATCGTTGTCT

>2798

TCCTAAAATGTCAGCATGCTGGTTTTCATGTGCTGCCTCGTACAGTAAGTCCCCAGCAG  
ATTTAAATAAGGTTGTGTCAAACATATGCCTATGTTTTTTTTAACATCGTTGTCTCATAA  
GTGTGCAGTAATGGCATATT

>2799

CCCAGCAGATTTAAATAAGGTTGTGTCAAACATATGCCTATGTTTTTTTTAACATCGTT  
GTCTCATAAGTGTGCAGTAATGGCATATTGAGACTGTTTCATAGACTGGTCAGCTGCATT  
TCCTGCAGCCGAGGAACCCTT

>2800

GATTTAAATAAGGTTGTGTCAAACATATGCCTATGTTTTTTTTAACATCGTTGTCTCATA  
AGTGTGCAGTAATGGCATATTGAGACTGTTTCATAGACTGGTCAGCTGCATTTCTGCAG  
CCGAGGAACCCTTTATTAAG
